# Supplementary material for: CUL4A-DDB1-DCAF10 is an N-recognin for N-terminally acetylated Src kinases
Source: Research Square preprint supplement (doi:10.21203/rs.3.rs-6184818/v1), 2025-04-01
Supplement: Supplementary file 1 [file 081ab6a2ea2f8d653bb99ada.xlsx]

## Sheet: RNAi dCAF10
Control (sum intensities of fractions)	siRNA DCAF10 (sum of intensities of fractions)	Protein.Group	Protein.Ids	Protein.Names	Genes	First.Protein.Description
22.3703	NaN	Q5QP82	A0A0A0MQT4;Q5QP82-2;Q5QP82	DCA10_HUMAN	DCAF10	DDB1- and CUL4-associated factor 10
15.1519	15658475	Q5XKK7	H3BRU1;H3BPC2;Q5XKK7	F219B_HUMAN	FAM219B	Protein FAM219B
17.0138	16.9327	Q17RY6;Q17RY6-2	H0YB07;Q17RY6-2;E5RGJ8;Q17RY6	LY6K_HUMAN	LY6K	Lymphocyte antigen 6K
18.3329	18.1736	P49748-2	P49748-2	ACADV_HUMAN	ACADVL	Isoform of P49748, Isoform 2 of Very long-chain specific acyl-CoA dehydrogenase, mitochondrial
18.4751	17.865	P16383-3	P16383-3	GCFC2_HUMAN	GCFC2	Isoform of P16383, Isoform 3 of Intron Large complex component GCFC2
18.8394	17.9636	Q9H4X1;Q9H4X1-2	Q9H4X1-2;Q9H4X1	RGCC_HUMAN	RGCC	Regulator of cell cycle RGCC
18.9545	21.2255	P05106	P05106-2;P05106-3;I3L4X8;H3BM21;P05106	ITB3_HUMAN	ITGB3	Integrin beta-3
19.0376	22.4229	Q9HB65;Q9HB65-2	Q9HB65-2;Q9HB65	ELL3_HUMAN	ELL3	RNA polymerase II elongation factor ELL3
19.0978	20.5487	Q96EF9;Q96K31	Q96EF9;Q96K31	CH076_HUMAN;ZHX1R_HUMAN	C8orf76;ZHX1-C8orf76	Zinc fingers and homeoboxes protein 1, isoform 2
19.2063	20.787	Q7Z7K0	Q7Z7K0	COXM1_HUMAN	CMC1	COX assembly mitochondrial protein homolog
19.2531	17.9559	Q13555-9	Q13555-9;A0A8V8TQW6;A0A8V8TQ60	KCC2G_HUMAN	CAMK2G	Isoform of Q13555, Isoform 9 of Calcium/calmodulin-dependent protein kinase type II subunit gamma
19.2645	19.1749	P51114-2	E7EU85;E9PFF5;A0A8V8TNP6;P51114-2	FXR1_HUMAN	FXR1	Isoform of P51114, Isoform 2 of RNA-binding protein FXR1
19.3384	18.8361	Q5JU85;Q5JU85-3	A0A6Q8PFR7;Q5JU85-3;A0A1W2PR18;A0A1W2PR28;Q5JU85	IQEC2_HUMAN	IQSEC2	IQ motif and SEC7 domain-containing protein 2
19.368	NaN	P49184	P49184	DNSL1_HUMAN	DNASE1L1	Deoxyribonuclease-1-like 1
19.3751	20.0398	O43791	O43791	SPOP_HUMAN	SPOP	Speckle-type POZ protein
19.4099	19.6738	H0YM70	H0YM70	H0YM70_HUMAN	PSME2	Isoform of Q9UL46, Proteasome activator subunit 2
19.4743	23.0295	Q9UPW6;Q9UPW6-2	Q9UPW6-2;C9JR56;A0A8V8TPF3;Q9UPW6	SATB2_HUMAN	SATB2	DNA-binding protein SATB2
19.5017	20.611	Q92692-2	Q92692-2	NECT2_HUMAN	NECTIN2	Isoform of Q92692, Isoform Alpha of Nectin-2
19.5048	24.3251	Q9ULJ8;Q9ULJ8-3;Q9ULJ8-4;Q9ULJ8-5	Q9ULJ8-3;Q9ULJ8-4;Q9ULJ8-5;Q9ULJ8	NEB1_HUMAN	PPP1R9A	Neurabin-1
19.5239	22.4596	Q9BWC9	K7EMI9;Q9BWC9	CC106_HUMAN	CCDC106	Coiled-coil domain-containing protein 106
19.5695	23.5021	O75570	X6RFD4;Q8N6Z2;A0A087X1S1;O75570-2;O75570	RF1M_HUMAN	MTRF1	Peptide chain release factor 1, mitochondrial
19.5806	19.6798	Q9UGK8	H0YEL8;Q9UGK8	SRGEF_HUMAN	SERGEF	Secretion-regulating guanine nucleotide exchange factor
19.5938	20.2745	Q5HYI7;Q5HYI7-4	Q5HYI7-2;Q5HYI7-4;Q5HYI7-5;Q5HYI7	MTX3_HUMAN	MTX3	Metaxin-3
19.6063	19.3243	Q14681	J3QSC8;Q14681	KCTD2_HUMAN	KCTD2	BTB/POZ domain-containing protein KCTD2
19.6251	21.6844	Q0P5N6	B4E3H0;I3L4Z7;I3L196;Q0P5N6	ARL16_HUMAN	ARL16	ADP-ribosylation factor-like protein 16
19.6968	18.5727	Q15413;Q15413-2	A0A0X1KG73;Q15413-2;Q15413-3;A0A087X080;Q15413	RYR3_HUMAN	RYR3	Ryanodine receptor 3
19.7216	18.6857	Q9BXS9;Q9BXS9-2;Q9BXS9-3;Q9BXS9-4;Q9BXS9-5;Q9BXS9-7	Q9BXS9-2;Q9BXS9-3;Q9BXS9-4;Q9BXS9-5;Q9BXS9-7;G3XAC1;A0A0C4DFT5;Q9BXS9	S26A6_HUMAN	SLC26A6	Solute carrier family 26 member 6
19.7485	19.0202	Q8NBT0;Q8NBT0-2;Q8NBT0-3	Q8NBT0-2;Q8NBT0-3;Q8NBT0	POC1A_HUMAN	POC1A	POC1 centriolar protein homolog A
19.773	23.1746	Q96NW7;Q96NW7-2	A0A075B6E9;A0A494C1A4;Q96NW7-2;Q96NW7	LRRC7_HUMAN	LRRC7	Leucine-rich repeat-containing protein 7
19.7855	21.5649	Q16181-2	Q16181-2	SEPT7_HUMAN	SEPTIN7	Isoform of Q16181, Isoform 2 of Septin-7
19.7995	20.758	P18583-6	P18583-6	SON_HUMAN	SON	Isoform of P18583, Isoform E of Protein SON
19.8393	20.1247	P57768;P57768-2	P57768-2;E5RJ65;E5RGS8;E5RGQ6;E5RHF1;P57768	SNX16_HUMAN	SNX16	Sorting nexin-16
19.8501	22.9752	P30622;P30622-1	P30622-1;F5H6A0;F5H0N7;P30622	CLIP1_HUMAN	CLIP1	CAP-Gly domain-containing linker protein 1
19.8669	19.5228	Q9H2K0	Q9H2K0	IF3M_HUMAN	MTIF3	Translation initiation factor IF-3, mitochondrial
19.9018	27.2236	Q9NY35;Q9NY35-2	A0A0R4J2F2;D6RIU2;D6RFX6;Q9NY35-2;D6RDY1;D6RHU6;D6RC11;D6RAZ7;D6RA76;D6RDP6;D6RDI6;D6RD48;D6RCR8;D6RCE6;D6R9S8;H0Y8T9;Q9NY35	CLDN1_HUMAN	CLDND1	Claudin domain-containing protein 1
19.9048	22.3618	Q6ZU80;Q6ZU80-1	H0YJE3;Q6ZU80-1;Q6ZU80	CE128_HUMAN	CEP128	Centrosomal protein of 128 kDa
19.9196	18.2583	A0A1B0GUD6;A0A1B0GVV0;A0A1W2PQ30	A0A1B0GUD6;A0A1B0GVV0;A0A1W2PQ30	A0A1B0GUD6_HUMAN;A0A1B0GVV0_HUMAN;A0A1W2PQ30_HUMAN	GRAMD1B	Isoform of Q3KR37, GRAM domain containing 1B
20.124	19.171	O60239;O60239-2	O60239-2;C9JK30;O60239	3BP5_HUMAN	SH3BP5	SH3 domain-binding protein 5
20.1479	26.2047	Q6PH81;Q6PH81-2	Q6PH81-2;Q6PH81	CP087_HUMAN	C16orf87	UPF0547 protein C16orf87
20.1552	20.8754	Q9NQ11;Q9NQ11-2;Q9NQ11-3	Q9NQ11-2;Q9NQ11-3;Q9NQ11	AT132_HUMAN	ATP13A2	Polyamine-transporting ATPase 13A2
20.1635	20.4816	Q8IWS0-2	Q8IWS0-2;Q5JRC6;A0A0D9SGE8	PHF6_HUMAN	PHF6	Isoform of Q8IWS0, Isoform 2 of PHD finger protein 6
20.1727	19.3033	Q6PJT7-3	G3V5I6;Q6PJT7-3;Q6PJT7-10	ZC3HE_HUMAN	ZC3H14	Isoform of Q6PJT7, Isoform 3 of Zinc finger CCCH domain-containing protein 14
20.1848	23.2778	Q9NX38	X6REY2;Q9NX38	ABITM_HUMAN	ABITRAM	Protein Abitram
20.2051	17.5317	P52952	P52952-2;P52952-3;E5RH49;P52952	NKX25_HUMAN	NKX2-5	Homeobox protein Nkx-2.5
20.2432	22.7772	G3V542	G3V542	G3V542_HUMAN	TUBB3	Isoform of Q13509, Tubulin beta 3 class III (Fragment)
20.2741	22.9969	E9PNX1	E9PNX1	E9PNX1_HUMAN	SERPINH1	Isoform of P50454, Serpin family H member 1 (Fragment)
20.3163	NaN	Q9ULU4-2	Q9ULU4-20;Q9ULU4-21;Q9ULU4-12;Q9ULU4-14;Q9ULU4-15;Q9ULU4-18;Q9ULU4-10;Q9ULU4-17;Q9ULU4-2;Q9ULU4-3;Q9ULU4-4;Q9ULU4-5;Q9ULU4	ZMYD8_HUMAN	ZMYND8	Isoform of Q9ULU4, Isoform 2 of MYND-type zinc finger-containing chromatin reader ZMYND8
20.3201	22.2604	A0PJW6	A0PJW6	TM223_HUMAN	TMEM223	Transmembrane protein 223
20.3323	19.6838	P50219;P50219-2	P50219-2;P50219	MNX1_HUMAN	MNX1	Motor neuron and pancreas homeobox protein 1
20.4002	23.5873	O15409;O15409-4;O15409-5;O15409-6;O15409-7;O15409-8;O15409-9	A8MUV4;A0A0U1RQR8;A0A0U1RQM2;A0A0U1RQY3;A0A0U1RQE0;C9JQP8;O15409-4;O15409-5;O15409-6;O15409-7;O15409-8;O15409-9;Q8N6B5;A0A994J6W1;A0A994J3Y0;O15409	FOXP2_HUMAN	FOXP2	Forkhead box protein P2
20.419	21.6815	O60507	O60507	TPST1_HUMAN	TPST1	Protein-tyrosine sulfotransferase 1
20.4198	24.8518	Q6XE24;Q6XE24-2;Q6XE24-3;Q6XE24-4;Q6XE24-5	C9J9B2;Q6XE24-3;Q6XE24-4;Q6XE24-5;Q6XE24-2;A0A1B0GUW5;C9JIJ9;Q6XE24	RBMS3_HUMAN	RBMS3	RNA-binding motif, single-stranded-interacting protein 3
20.4494	26.4565	Q58FG0	Q58FG0	HS905_HUMAN	HSP90AA5P	Putative heat shock protein HSP 90-alpha A5
20.4747	20.29	P16035	P16035	TIMP2_HUMAN	TIMP2	Metalloproteinase inhibitor 2
20.524	20.7139	Q9UKF7-2	Q9UKF7-2;A0A0C4DGP0	PITC1_HUMAN	PITPNC1	Isoform of Q9UKF7, Isoform 2 of Cytoplasmic phosphatidylinositol transfer protein 1
20.532	NaN	A0A1B0GVL4	A0A1B0GVL4	A0A1B0GVL4_HUMAN	FAM193A	Isoform of P78312, Family with sequence similarity 193 member A
20.5495	21.7844	Q96GS6;Q96GS6-2	Q96GS6-2;A0A7I2YQW9;Q96GS6	AB17A_HUMAN	ABHD17A	Alpha/beta hydrolase domain-containing protein 17A
20.5608	23.2595	Q9BRQ6	J3QTB2;J3QTA6;Q9BRQ6	MIC25_HUMAN	CHCHD6	MICOS complex subunit MIC25
20.5695	22.4225	Q15035	Q15035	TRAM2_HUMAN	TRAM2	Translocating chain-associated membrane protein 2
20.5986	20.126	P40189	A0A0A0N0L5;A0A8V8TNI4;A0A8V8TMJ4;A0A8V8TMJ9;P40189-3;P40189	IL6RB_HUMAN	IL6ST	Interleukin-6 receptor subunit beta
20.6899	19.8162	Q15464;Q15464-2	Q15464-2;Q15464	SHB_HUMAN	SHB	SH2 domain-containing adapter protein B
20.71	19.7792	Q9H8W3	Q5T374;F2Z2Y3;Q9H8W3	F204A_HUMAN	FAM204A	Protein FAM204A
20.7236	17.8935	Q16760;Q16760-2	Q16760-2;H7BZR7;Q16760	DGKD_HUMAN	DGKD	Diacylglycerol kinase delta
20.7545	19.8452	P28370-2	A0A0A0MRP6;P28370-2	SMCA1_HUMAN	SMARCA1	Isoform of P28370, Isoform 2 of Probable global transcription activator SNF2L1
20.7935	22.3555	Q6EMK4	Q6EMK4	VASN_HUMAN	VASN	Vasorin
20.8054	20.1681	Q68DC2;Q68DC2-4	Q68DC2-3;Q68DC2-4;Q68DC2	ANKS6_HUMAN	ANKS6	Ankyrin repeat and SAM domain-containing protein 6
20.8683	21.1472	Q86W92-2	Q86W92-2	LIPB1_HUMAN	PPFIBP1	Isoform of Q86W92, Isoform 2 of Liprin-beta-1
20.8808	21.4555	Q7L2Z9	Q7L2Z9	CENPQ_HUMAN	CENPQ	Centromere protein Q
20.8926	19.6606	Q5T4F4;Q5T4F4-2;Q5T4F4-3;Q5T4F4-5;Q5T4F4-6;Q5T4F4-7;Q5T4F4-8	Q5T4F4-2;Q5T4F4-3;Q5T4F4-5;Q5T4F4-6;Q5T4F4-7;Q5T4F4-8;Q5T4F4	ZFY27_HUMAN	ZFYVE27	Protrudin
20.9161	17.5875	P02795;P13640;P13640-2;P80297	P13640-2;P02795;Q8N339;P80297;P13640;P04732	MT1G_HUMAN;MT1X_HUMAN;MT2_HUMAN	MT1G;MT1X;MT2A	Metallothionein-2
20.9183	22.9293	Q96NB1;Q96NB1-2	I3NI25;I3L269;Q96NB1-2;Q96NB1	CEP20_HUMAN	CEP20	Centrosomal protein 20
20.9387	26.3429	Q9UGM1	Q9UGM1	ACHA9_HUMAN	CHRNA9	Neuronal acetylcholine receptor subunit alpha-9
20.9609	NaN	K7ES11	K7ES11	K7ES11_HUMAN	UBE2O	Isoform of Q9C0C9, Ubiquitin conjugating enzyme E2 O (Fragment)
20.966	23.6792	O75953;O75953-4;O75953-5	O75953-4;O75953-5;A0A7I2RN43;H0YH04;H0YFL9;Q5T657;H7C5W0;O75953	DNJB5_HUMAN	DNAJB5	DnaJ homolog subfamily B member 5
20.9708	29.4131	Q96AP4	Q96AP4	ZUP1_HUMAN	ZUP1	Zinc finger-containing ubiquitin peptidase 1
20.9747	28.6531	P17066	P48741;P17066	HSP76_HUMAN	HSPA6	Heat shock 70 kDa protein 6
20.9821	23.7942	Q8N2S1-3	Q8N2S1-2;Q8N2S1-3;A0A0C4DH07;Q8N2S1	LTBP4_HUMAN	LTBP4	Isoform of Q8N2S1, Isoform 3 of Latent-transforming growth factor beta-binding protein 4
20.9887	26.9646	Q9UIS9-8	A0A0A0MS90;Q9UIS9-2;Q9UIS9-4;Q9UIS9-5;Q9UIS9-6;Q9UIS9-7;Q9UIS9-8;Q9UIS9-9;A0A994J7H0;Q9UIS9-10;Q9UIS9-11;Q9UIS9-12;Q9UIS9	MBD1_HUMAN	MBD1	Isoform of Q9UIS9, Isoform 8 of Methyl-CpG-binding domain protein 1
21.0152	21.817	O43248	J3KMZ0;O43248	HXC11_HUMAN	HOXC11	Homeobox protein Hox-C11
21.0274	21.0516	O94885	O94885	SASH1_HUMAN	SASH1	SAM and SH3 domain-containing protein 1
21.0329	20.2611	Q1ZZU3	H3BLW9;V9GYD7;V9GZ11;H7C5E9;H7C3F2;A0A494C0Z4;A0A8Q3SIQ2;Q1ZZU3	SWI5_HUMAN	SWI5	DNA repair protein SWI5 homolog
21.0402	22.7227	O75891;O75891-3	O75891-3;O75891-4;O75891	AL1L1_HUMAN	ALDH1L1	Cytosolic 10-formyltetrahydrofolate dehydrogenase
21.0518	27.2561	Q8NF91;Q8NF91-4	Q8NF91-4;Q8NF91-7;A0A0C4DG40;Q8NF91	SYNE1_HUMAN	SYNE1	Nesprin-1
21.063	21.3673	Q5T6S3;Q5T6S3-2;Q5T6S3-3	B0QZ72;Q5T6S3-2;Q5T6S3-3;X6RER8;A0A087X169;Q5T6S3	PHF19_HUMAN	PHF19	PHD finger protein 19
21.0837	23.9896	Q09019	G5E9A7;Q09019	DMWD_HUMAN	DMWD	Dystrophia myotonica WD repeat-containing protein
21.0868	23.2675	Q9H1X3	Q9H1X3-2;Q9H1X3	DJC25_HUMAN	DNAJC25	DnaJ homolog subfamily C member 25
21.1286	19.9122	P17302	P17302	CXA1_HUMAN	GJA1	Gap junction alpha-1 protein
21.1952	21.893	O94876;O94876-2	E9PC87;O94876-2;Q6N039;A0A8V8TLJ9;O94876	TMCC1_HUMAN	TMCC1	Transmembrane and coiled-coil domains protein 1
21.2068	24.4732	Q9HD67;Q9HD67-3	Q9HD67-3;A0A0A0MQX1;E9PEW5;Q9HD67	MYO10_HUMAN	MYO10	Unconventional myosin-X
21.2098	22.031	Q8N3J3;Q8N3J3-3;Q8N3J3-4	Q8N3J3-3;Q8N3J3-4;Q8N3J3	HROB_HUMAN	HROB	Homologous recombination OB-fold protein
21.2405	19.3993	Q9NUL5;Q9NUL5-3;Q9NUL5-4	Q9NUL5-2;Q9NUL5-3;Q9NUL5-4;Q9NUL5	SHFL_HUMAN	SHFL	Shiftless antiviral inhibitor of ribosomal frameshifting protein
21.2722	21.7374	O76082;O76082-2;O76082-3	O76082-2;O76082-3;A0A8I5KTN6;A0A8I5KUR7;A0A8I5KYG6;O76082	OCTN2_HUMAN	SLC22A5	Organic cation/carnitine transporter 2
21.2906	21.8665	Q8IWQ3-4	Q8IWQ3-2;Q8IWQ3-3;Q8IWQ3-4;Q8IWQ3-5;Q8IWQ3-6;Q8IWQ3	BRSK2_HUMAN	BRSK2	Isoform of Q8IWQ3, Isoform 4 of Serine/threonine-protein kinase BRSK2
21.3075	23.2717	O75400-3	H0YG38;O75400-3	PR40A_HUMAN	PRPF40A	Isoform of O75400, Isoform 3 of Pre-mRNA-processing factor 40 homolog A
21.3111	23.4535	Q96BK5	Q9BT81-2;Q96BK5-2;E5RJG9;E5RGR1;A0A0A6YYK5;Q96BK5	PINX1_HUMAN	PINX1	PIN2/TERF1-interacting telomerase inhibitor 1
21.3121	20.5652	P02686;P02686-2;P02686-3;P02686-4;P02686-5;P02686-6	A8MZH3;P02686-2;P02686-3;P02686-4;P02686-5;P02686-6;J3KS94;J3KT34;F8WEU6;H0YEA2;H0YF02;H7BYR8;E9PSE2;E9PQE7;E9PNZ1;E9PKX9;E9PLQ9;E9PLU9;E9PMR5;J3QKL5;J3QL64;F5H7N4;J3QQK6;P02686	MBP_HUMAN	MBP	Myelin basic protein
21.3609	23.7065	P52429	I3L112;P52429	DGKE_HUMAN	DGKE	Diacylglycerol kinase epsilon
21.3936	21.1446	Q8IW50;Q8IW50-2;Q8IW50-3;Q8IW50-4;Q8IW50-5;Q8IW50-6;Q8IW50-7	Q8IW50-2;Q8IW50-3;Q8IW50-4;Q8IW50-5;Q8IW50-6;Q8IW50-7;Q5T586;Q5T593;A0A0A0MRW0;A0A0A0MRW1;A0A0A0MRW2;A0A0A0MRW3;A0A0A0MRV9;Q8IW50	F219A_HUMAN	FAM219A	Protein FAM219A
21.4011	23.9739	Q6P3W2;Q6P3W2-2	Q6P3W2-2;Q6P3W2	DJC24_HUMAN	DNAJC24	DnaJ homolog subfamily C member 24
21.4261	22.0289	Q9BRU9	Q9BRU9	UTP23_HUMAN	UTP23	rRNA-processing protein UTP23 homolog
21.4274	22.2678	Q86YS6	Q86YS6	RAB43_HUMAN	RAB43	Ras-related protein Rab-43
21.4288	23.5979	Q99574	Q99574	NEUS_HUMAN	SERPINI1	Neuroserpin
21.441	23.005	A6NP11;Q96JC4	P0CB33;A6NP11;Q96JC4	ZN479_HUMAN;ZN716_HUMAN	ZNF479;ZNF716	Zinc finger protein 716
21.4426	23.7565	Q96NT0	B8ZZ99;Q96NT0	CC115_HUMAN	CCDC115	Coiled-coil domain-containing protein 115
21.4446	26.8554	Q9BVV6;Q9BVV6-2;Q9BVV6-3;Q9BVV6-4	Q9BVV6-2;Q9BVV6-3;Q9BVV6-4;A0A494C0Z1;A0A494C171;A0A494C0M8;A0A087WYM5;Q9BVV6	TALD3_HUMAN	KIAA0586	Protein TALPID3
21.4555	21.6125	O15061;O15061-2	O15061-2;A0A075B7B1;H0YL34;O15061	SYNEM_HUMAN	SYNM	Synemin
21.4965	23.6823	P12273	P12273	PIP_HUMAN	PIP	Prolactin-inducible protein
21.525	22.5529	P17096-2	P17096-2	HMGA1_HUMAN	HMGA1	Isoform of P17096, Isoform HMG-Y of High mobility group protein HMG-I/HMG-Y
21.5875	22.4191	Q6UW78	Q6UW78	UQCC3_HUMAN	UQCC3	Ubiquinol-cytochrome-c reductase complex assembly factor 3
21.5922	24.0165	Q00597	A0A087WW44;Q00597	FANCC_HUMAN	FANCC	Fanconi anemia group C protein
21.5951	26.1882	Q4L235;Q4L235-2;Q4L235-3;Q4L235-4	Q4L235-2;Q4L235-3;Q4L235-4;R4GNB1;Q4L235	ACSF4_HUMAN	AASDH	Beta-alanine-activating enzyme
21.6007	19.5585	Q12946	Q12946	FOXF1_HUMAN	FOXF1	Forkhead box protein F1
21.6124	19.0312	Q68DQ2	Q68DQ2	CRBG3_HUMAN	CRYBG3	Very large A-kinase anchor protein
21.6141	25.1508	Q6V9R5;Q6V9R5-2	K7EIE6;Q6V9R5-2;Q6V9R5	ZN562_HUMAN	ZNF562	Zinc finger protein 562
21.6151	20.9238	Q9HB66	Q9HB66	Q9HB66_HUMAN	MKKS	Alternative protein MKKS
21.633	20.1546	Q04727;Q04727-2;Q04727-3;Q04727-4	Q5JSY7;Q04727-2;Q04727-3;Q04727-4;H7C4W5;H7C4P7;A0A994J7T6;Q04727	TLE4_HUMAN	TLE4	Transducin-like enhancer protein 4
21.6339	23.4823	Q9H160;Q9H160-2	C9J4X5;Q9H160-2;Q9H160	ING2_HUMAN	ING2	Inhibitor of growth protein 2
21.6395	19.2403	Q5T7W0;Q5T7W0-2;Q5T7W0-4	Q5T7W0-2;Q5T7W0-4;Q5T7W0	ZN618_HUMAN	ZNF618	Zinc finger protein 618
21.67	24.9258	Q6NUK4;Q6NUK4-2	A0A0U1RR85;Q6NUK4-2;Q6NUK4	REEP3_HUMAN	REEP3	Receptor expression-enhancing protein 3
21.6789	22.7503	Q8NG11;Q8NG11-2	A6NEP9;Q8NG11-2;Q8NG11	TSN14_HUMAN	TSPAN14	Tetraspanin-14
21.7123	22.8478	Q8TBF2;Q8TBF2-2;Q8TBF2-3;Q8TBF2-4;Q8TBF2-6;Q8TBF2-7	J3KPF5;J3KPF6;J3KRV9;A0A2P0CTH9;A0A2P0CTB1;A0A2P0CU24;A0A0G2JSF1;A0A0G2JRR6;A0A0A0MRV4;A0A0A0MT35;J3QKK8;Q8TBF2-2;Q8TBF2-3;Q8TBF2-4;Q8TBF2-6;Q8TBF2-7;Q8TBF2	PXL2B_HUMAN	PRXL2B	Prostamide/prostaglandin F synthase
21.7139	20.3263	Q9Y2G2;Q9Y2G2-1;Q9Y2G2-4;Q9Y2G2-7	Q9Y2G2-1;Q9Y2G2-4;Q9Y2G2-7;Q9Y2G2	CARD8_HUMAN	CARD8	Caspase recruitment domain-containing protein 8
21.7242	22.5064	P04066	P04066	FUCO_HUMAN	FUCA1	Tissue alpha-L-fucosidase
21.7262	23.9552	P02753	Q5VY30;P02753	RET4_HUMAN	RBP4	Retinol-binding protein 4
21.7339	23.9416	Q96J42;Q96J42-2	D6RBD9;D6RB48;H0Y997;Q96J42-2;Q96J42	TXD15_HUMAN	TXNDC15	Thioredoxin domain-containing protein 15
21.7375	21.7265	Q9NS73	S4R3P6;S4R3N2;S4R3Y0;S4R2X9;Q9NS73-2;Q9NS73-3;Q9NS73-5;Q9NS73	MBIP1_HUMAN	MBIP	MAP3K12-binding inhibitory protein 1
21.7724	25.2009	P06732	P06732	KCRM_HUMAN	CKM	Creatine kinase M-type
21.7746	24.9425	Q9NYZ1	C9JYS5;J3QL47;J3QL63;Q9NYZ1	TV23B_HUMAN	TVP23B	Golgi apparatus membrane protein TVP23 homolog B
21.7953	21.6267	V9GYT7	V9GYT7	V9GYT7_HUMAN	PSIP1	Isoform of O75475, PC4 and SFRS1 interacting protein 1 (Fragment)
21.7988	20.8997	P04746;P0DTE7;P0DTE8;P0DUB6;P19961;P19961-2	P19961-2;P0DTE7;P0DUB6;P19961;P0DTE8;P04746	AMY1A_HUMAN;AMY1B_HUMAN;AMY1C_HUMAN;AMY2B_HUMAN;AMYP_HUMAN	AMY1A;AMY1B;AMY1C;AMY2A;AMY2B	Pancreatic alpha-amylase
21.823	21.4211	Q99759;Q99759-2	J3KRN4;Q99759-2;J3QRB6;Q99759	M3K3_HUMAN	MAP3K3	Mitogen-activated protein kinase kinase kinase 3
21.8322	22.5227	Q8IXZ2	Q8IXZ2-2;Q8IXZ2	ZC3H3_HUMAN	ZC3H3	Zinc finger CCCH domain-containing protein 3
21.8424	20.7009	Q8WYL5;Q8WYL5-4	Q8WYL5-4;Q8WYL5	SSH1_HUMAN	SSH1	Protein phosphatase Slingshot homolog 1
21.8482	21.2382	Q66K89	H3BUJ7;H3BSL4;Q66K89	E4F1_HUMAN	E4F1	Transcription factor E4F1
21.851	24.0275	P10646	P10646	TFPI1_HUMAN	TFPI	Tissue factor pathway inhibitor
21.8948	20.7303	A0A7I2V3F7	A0A7I2V3F7	A0A7I2V3F7_HUMAN	HSPA9	Isoform of P38646, Heat shock protein family A (Hsp70) member 9
21.9013	23.2218	Q9Y2J4-2	Q9Y2J4-2;Q9Y2J4-3;Q9Y2J4-4;Q9Y2J4	AMOL2_HUMAN	AMOTL2	Isoform of Q9Y2J4, Isoform 2 of Angiomotin-like protein 2
21.9356	23.0435	Q8N567	Q8N567	ZCHC9_HUMAN	ZCCHC9	Zinc finger CCHC domain-containing protein 9
21.9391	21.353	Q9H7H0;Q9H7H0-2;Q9H7H0-3	G3V3X6;G3V4H5;G3V4P2;G3V353;Q9H7H0-2;Q9H7H0-3;Q9H7H0	MET17_HUMAN	METTL17	Methyltransferase-like protein 17, mitochondrial
21.9481	22.8902	Q02833;Q02833-2;Q02833-3	F8W7Q0;A0A0J9YYE4;A0A0G2JLR5;A0A0G2JMW4;E9PM39;Q02833-2;Q02833-3;Q02833	RASF7_HUMAN	RASSF7	Ras association domain-containing protein 7
21.9487	26.3905	Q03181;Q03181-2;Q03181-3;Q03181-4	Q03181-2;Q03181-3;Q03181-4;Q03181	PPARD_HUMAN	PPARD	Peroxisome proliferator-activated receptor delta
21.9548	22.9697	Q7Z4R8	Q7Z4R8	CF120_HUMAN	C6orf120	UPF0669 protein C6orf120
21.9589	NaN	Q5U4P2	Q5U4P2	ASPH1_HUMAN	ASPHD1	Aspartate beta-hydroxylase domain-containing protein 1
21.964	22.306	P61371;Q96A47	D6RBJ1;Q96A47;P61371	ISL1_HUMAN;ISL2_HUMAN	ISL1;ISL2	Insulin gene enhancer protein ISL-1
21.9749	22.1417	Q13099;Q13099-1;Q13099-3	Q13099-1;Q13099-3;F5H6C2;Q13099	IFT88_HUMAN	IFT88	Intraflagellar transport protein 88 homolog
21.993	21.5275	Q9UJP4;Q9UJP4-2	Q9UJP4-2;Q9UJP4	KLH21_HUMAN	KLHL21	Kelch-like protein 21
22.0058	NaN	Q9UKA2	Q9UKA2	FBXL4_HUMAN	FBXL4	F-box/LRR-repeat protein 4
22.0153	24.8038	Q9Y5U8	Q5TI65;A0A087WVZ0;Q9Y5U8	MPC1_HUMAN	MPC1	Mitochondrial pyruvate carrier 1
22.0324	24.2507	Q70EL1;Q70EL1-7	Q70EL1-6;Q70EL1-7;A0A7P0T9K1;A0A7P0T9N2;A0A804D9U3;R4GN32;H7C296;H7C1E9;A0A8I5KNN9;A0A8I5KTP4;A0A8I5KYV7;A0A8I5KYW2;Q70EL1	UBP54_HUMAN	USP54	Inactive ubiquitin carboxyl-terminal hydrolase 54
22.0328	18.811	O94988;O94988-1;O94988-3;O94988-5;O94988-6	E9PGM7;O94988-1;O94988-3;O94988-5;O94988-6;O94988	FA13A_HUMAN	FAM13A	Protein FAM13A
22.0429	NaN	Q9UM54-2;Q9UM54-5	Q9UM54-2;Q9UM54-5;A0A0A0MRM8	MYO6_HUMAN	MYO6	Isoform of Q9UM54, Isoform 2 of Unconventional myosin-VI
22.0432	21.109	Q8N0Z3	Q8N0Z3	SPICE_HUMAN	SPICE1	Spindle and centriole-associated protein 1
22.0485	27.0655	O60303	H3BNJ6;A0A087X098;O60303	KATIP_HUMAN	KATNIP	Katanin-interacting protein
22.0744	24.2792	Q9ULT0;Q9ULT0-4	Q9ULT0-3;Q9ULT0-4;H0Y3V7;G5E9G4;H7C055;A0A8V8TMV0;Q9ULT0	TTC7A_HUMAN	TTC7A	Tetratricopeptide repeat protein 7A
22.0746	23.7444	Q08050;Q08050-2	H0YG99;Q08050-2;Q08050-3;A0A0D9SFF0;Q08050	FOXM1_HUMAN	FOXM1	Forkhead box protein M1
22.0958	23.1679	Q8TAD7	F8VQD4;Q8TAD7	OCC1_HUMAN	OCC1	Overexpressed in colon carcinoma 1 protein
22.1005	25.968	Q9HB20	F8WCR7;Q9HB20	PKHA3_HUMAN	PLEKHA3	Pleckstrin homology domain-containing family A member 3
22.1008	22.3236	Q587I9	Q587I9	SFT2C_HUMAN	SFT2D3	Vesicle transport protein SFT2C
22.1095	24.6507	Q5C9Z4	Q5C9Z4	NOM1_HUMAN	NOM1	Nucleolar MIF4G domain-containing protein 1
22.1099	19.6937	Q8IYL2	Q8IYL2-2;Q8IYL2-3;Q8IYL2	TRM44_HUMAN	TRMT44	Probable tRNA (uracil-O(2)-)-methyltransferase
22.1164	NaN	A0A1B0GV68	A0A1B0GV68	A0A1B0GV68_HUMAN	FARP1	Isoform of Q9Y4F1, FERM, ARH/RhoGEF and pleckstrin domain protein 1
22.1175	17.7999	Q53TQ3	Q53TQ3	IN80D_HUMAN	INO80D	INO80 complex subunit D
22.1286	22.5958	M0R0K9	M0R0K9	M0R0K9_HUMAN	TRIM28	Isoform of Q13263, Tripartite motif containing 28 (Fragment)
22.1308	20.5343	H0Y9Y2	H0Y9Y2	H0Y9Y2_HUMAN	BOD1L1	Isoform of Q8NFC6, Biorientation of chromosomes in cell division 1 like 1
22.1407	23.4515	Q6P444	H0YEA6;Q6P444	MTFR2_HUMAN	MTFR2	Mitochondrial fission regulator 2
22.1493	23.123	Q96JS3	Q96JS3	PGBD1_HUMAN	PGBD1	PiggyBac transposable element-derived protein 1
22.1535	25.2673	P07305	P07305-2;P07305	H10_HUMAN	H1-0	Histone H1.0
22.1536	23.4843	Q63HR2;Q63HR2-2;Q63HR2-4;Q63HR2-5;Q63HR2-6	F8VV64;Q63HR2-2;Q63HR2-4;Q63HR2-5;Q63HR2-6;Q63HR2	TENS2_HUMAN	TNS2	Tensin-2
22.1642	21.8553	H7C3M7	H7C3M7	H7C3M7_HUMAN	FARP2	Isoform of O94887, FERM, ARH/RhoGEF and pleckstrin domain protein 2 (Fragment)
22.1845	26.3959	Q96JZ2;Q96JZ2-2	Q96JZ2-2;K7EP18;Q96JZ2	HSH2D_HUMAN	HSH2D	Hematopoietic SH2 domain-containing protein
22.2008	24.1514	A0A2R8Y454	A0A2R8Y454	A0A2R8Y454_HUMAN	MYH14	Isoform of Q7Z406, Myosin heavy chain 14 (Fragment)
22.2356	19.111	P42224-2	J3KPM9;P42224-2	STAT1_HUMAN	STAT1	Isoform of P42224, Isoform Beta of Signal transducer and activator of transcription 1-alpha/beta
22.2559	23.7606	Q9NS93	H0YFT0;H0YFW7;H0YFM3;F5GWC3;Q9NS93	TM7S3_HUMAN	TM7SF3	Transmembrane 7 superfamily member 3
22.2568	22.9442	Q01664	Q01664	TFAP4_HUMAN	TFAP4	Transcription factor AP-4
22.2606	20.1776	Q9NP84	Q9NP84	TNR12_HUMAN	TNFRSF12A	Tumor necrosis factor receptor superfamily member 12A
22.2613	17.45	Q9H707	M0R1N2;M0QY62;A0A494C1I7;B7Z6K7;Q9H707;E7ETH6	ZN552_HUMAN	ZNF552	Zinc finger protein 552
22.2613	20.8538	Q05823;Q05823-2	Q05823-2;Q05823	RN5A_HUMAN	RNASEL	2-5A-dependent ribonuclease
22.2779	24.0164	Q6UXV4	Q6UXV4	MIC27_HUMAN	APOOL	MICOS complex subunit MIC27
22.292	20.5588	Q9UI09	Q9UI09	NDUAC_HUMAN	NDUFA12	NADH dehydrogenase [ubiquinone] 1 alpha subcomplex subunit 12
22.3146	23.2593	P17152	P17152	TMM11_HUMAN	TMEM11	Transmembrane protein 11, mitochondrial
22.3193	24.533	Q53GS7;Q53GS7-2	A0A804HI94;A0A804HJ70;A0A804HIJ1;A0A804HK09;A0A804HJY9;A0A804HJB3;Q53GS7-2;Q53GS7	GLE1_HUMAN	GLE1	mRNA export factor GLE1
22.3229	21.5951	Q12805;Q12805-2;Q12805-3;Q12805-4;Q12805-5	A0A0U1RQV3;Q12805-2;Q12805-3;Q12805-4;Q12805-5;Q12805	FBLN3_HUMAN	EFEMP1	EGF-containing fibulin-like extracellular matrix protein 1
22.3464	25.074	O14548	H0YBD2;E5RJZ1;O14548	COX7R_HUMAN	COX7A2L	Cytochrome c oxidase subunit 7A-related protein, mitochondrial
22.3554	23.9648	Q9NWT8	Q9NWT8	AKIP_HUMAN	AURKAIP1	Small ribosomal subunit protein mS38
22.4057	18.6129	A8MW92	H0YDF7;F8W9L8;A0A0A0MQS0;A8MW92-4;A8MW92	P20L1_HUMAN	PHF20L1	PHD finger protein 20-like protein 1
22.4256	NaN	A0A0U1RQE4;A0A494C1M0	A0A0U1RQE4;A0A494C1M0	A0A0U1RQE4_HUMAN;A0A494C1M0_HUMAN	SH3D19	Isoform of Q5HYK7, SH3 domain containing 19
22.44	22.7397	Q02413	Q02413	DSG1_HUMAN	DSG1	Desmoglein-1
22.4487	21.7221	Q03188;Q03188-2	Q03188-2;H0Y8J2;Q03188	CENPC_HUMAN	CENPC	Centromere protein C
22.4495	22.2981	Q9GZU7-2;Q9GZU7-3	Q9GZU7-2;Q9GZU7-3;H7C270;H7C1Z7;Q9GZU7	CTDS1_HUMAN	CTDSP1	Isoform of Q9GZU7, Isoform 2 of Carboxy-terminal domain RNA polymerase II polypeptide A small phosphatase 1
22.4577	27.2579	Q9UJC5	Q9UJC5	SH3L2_HUMAN	SH3BGRL2	SH3 domain-binding glutamic acid-rich-like protein 2
22.4609	19.8	P20930	P20930	FILA_HUMAN	FLG	Filaggrin
22.4626	23.6759	Q8IZ40	Q8IZ40	RCOR2_HUMAN	RCOR2	REST corepressor 2
22.4675	22.523	Q9Y2H5	A0A1B0GUN5;Q5VTI5;Q9Y2H5	PKHA6_HUMAN	PLEKHA6	Pleckstrin homology domain-containing family A member 6
22.481	24.2701	Q9NUP1	Q9NUP1	BL1S4_HUMAN	BLOC1S4	Biogenesis of lysosome-related organelles complex 1 subunit 4
22.4906	19.4748	P10244;P10244-2	P10244-2;P10244	MYBB_HUMAN	MYBL2	Myb-related protein B
22.4954	22.579	P26012;P26012-2	P26012-2;P26012	ITB8_HUMAN	ITGB8	Integrin beta-8
22.5041	NaN	Q5HY98	Q9NV72-2;Q7L2R6-2;Q7L2R6-3;L0R8M2;Q9HCG1-2;E7EU70;E7EUL5;M0R1K6;M0R0P3;M0R0Z8;M0R0C2;M0R085;M0R099;M0R327;M0R2P3;M0R2R1;M0R3A5;M0R2L4;M0R1N4;M0R1T0;M0QXU9;M0QXU3;M0QXF0;M0QX96;M0QYS4;M0QYU5;M0QZA2;M0QZA4;M0QYE7;Q6IQ01;A0A494C1D2;A0A0B4J2B2;E7ENB8;G3XAE0;A0A994J813;A0A669KBJ2;A0A087WXU7;Q96IR2;Q9NV72;Q6ZNA1;A2RRD8;P17035;Q5HY98;Q5VIY5;Q8N782;P0CJ79;Q9HCG1;Q08AN1;Q86XN6;Q6ZN06;Q7L2R6	ZN766_HUMAN	ZNF766	Zinc finger protein 766
22.5101	22.1001	Q9UMX0-3	Q9UMX0-3;H0YDS0	UBQL1_HUMAN	UBQLN1	Isoform of Q9UMX0, Isoform 3 of Ubiquilin-1
22.5106	22.0701	Q8IZM8	Q8IZM8	ZN654_HUMAN	ZNF654	Zinc finger protein 654
22.5159	29.4292	Q5THK1;Q5THK1-2;Q5THK1-3;Q5THK1-4	Q5THK1-2;Q5THK1-3;Q5THK1-4;Q5THK1	PR14L_HUMAN	PRR14L	Protein PRR14L
22.5194	19.7227	P54253	P54253	ATX1_HUMAN	ATXN1	Ataxin-1
22.5237	NaN	A0A1B0GW05	A0A1B0GW05	A0A1B0GW05_HUMAN	DPY19L1	Isoform of Q2PZI1, Dpy-19 like C-mannosyltransferase 1
22.5361	19.256	O15131	A0A8V8TMV2;A0A8V8TL88;A0A8V8TLL2;O15131	IMA6_HUMAN	KPNA5	Importin subunit alpha-6
22.539	23.1986	Q99675	Q99675	CGRF1_HUMAN	CGRRF1	Cell growth regulator with RING finger domain protein 1
22.5477	21.3825	Q9H1J1;Q9H1J1-2	Q9H1J1-2;Q9H1J1	REN3A_HUMAN	UPF3A	Regulator of nonsense transcripts 3A
22.5485	22.4818	P57723;P57723-2	C9J0A4;P57723-2;P57723	PCBP4_HUMAN	PCBP4	Poly(rC)-binding protein 4
22.5499	21.2219	Q8N344	Q8N344	MIER2_HUMAN	MIER2	Mesoderm induction early response protein 2
22.5684	23.559	Q8WV60	D6RGK0;F6S289;Q8WV60-2;Q8WV60-3;Q8WV60	PTCD2_HUMAN	PTCD2	Pentatricopeptide repeat-containing protein 2, mitochondrial
22.5843	21.1632	E5RGW4	E5RGW4	E5RGW4_HUMAN	NPM1	Isoform of P06748, Nucleophosmin 1 (Fragment)
22.6013	23.2827	Q14789-2	A0A8Q3WLR7;A0A8Q3WKE2;A0A8Q3SHP0;Q14789-2	GOGB1_HUMAN	GOLGB1	Isoform of Q14789, Isoform 2 of Golgin subfamily B member 1
22.609	21.5804	P0CJ78	P0CJ78	ZN865_HUMAN	ZNF865	Zinc finger protein 865
22.6092	20.0572	O94810;O94810-2;O94810-3	O94810-2;O94810-3;O94810	RGS11_HUMAN	RGS11	Regulator of G-protein signaling 11
22.6115	21.1019	Q6IC98	H0Y5A3;Q6IC98	GRAM4_HUMAN	GRAMD4	GRAM domain-containing protein 4
22.6116	22.5016	Q9NWS8	A0A2R8Y4J4;Q9NWS8-2;A0A804HHW6;A0A804HLE1;A0A804HKF8;A0A087WXU0;Q9NWS8	RMND1_HUMAN	RMND1	Required for meiotic nuclear division protein 1 homolog
22.6125	23.1965	Q12796;Q12796-2	Q12796-2;Q12796	PNRC1_HUMAN	PNRC1	Proline-rich nuclear receptor coactivator 1
22.6175	21.6851	H0Y5F3	H0Y5F3	H0Y5F3_HUMAN	FLNA	Isoform of P21333, Filamin A (Fragment)
22.6187	21.5634	H0YAB3	H0YAB3	H0YAB3_HUMAN	SEC31A	Isoform of O94979, SEC31 homolog A, COPII coat complex component (Fragment)
22.6213	24.5383	Q92484;Q92484-2	Q92484-2;Q92484	ASM3A_HUMAN	SMPDL3A	Acid sphingomyelinase-like phosphodiesterase 3a
22.6217	22.5383	O76054;O76054-4;O76054-5	O76054-4;O76054-5;C9JZI9;B3KRD8;H7C417;O76054	S14L2_HUMAN	SEC14L2	SEC14-like protein 2
22.6241	19.5812	Q9C0C4	Q9C0C4	SEM4C_HUMAN	SEMA4C	Semaphorin-4C
22.6305	20.4442	Q96JN0-3	A0A6Q8PFM9;A0A6Q8PFQ9;A0A6Q8PGL8;A0A6Q8PGP3;A0A6Q8PH28;A0A6Q8PGR8;Q96JN0-2;Q96JN0-3;Q96JN0	LCOR_HUMAN	LCOR	Isoform of Q96JN0, Isoform 3 of Ligand-dependent corepressor
22.6328	23.5272	Q9NXJ5	U3KQ24;U3KQG9;S4R2Y9;Q9NXJ5	PGPI_HUMAN	PGPEP1	Pyroglutamyl-peptidase 1
22.6447	22.9406	P26367;P26367-2	A0A1X7SBT0;A0A1W2PP89;A0A1W2PP27;A0A1W2PQ31;A0A1W2PPG3;A0A1W2PPH0;A0A1W2PPJ2;A0A1W2PPM5;A0A1W2PPN2;A0A1W2PNS7;A0A1W2PRA4;A0A1W2PRA8;A0A1W2PQJ8;A0A1W2PQL7;A0A1W2PQM7;A0A1W2PQA8;A0A1W2PQG3;A0A1W2PQG7;A0A1W2PSA8;A0A1W2PRS6;A0A1W2PRU4;A0A1W2PSB5;A0A1W2PRW7;A0A1W2PS91;A0A1W2PRG3;A0A1W2PRH6;D1KF47;E9PKM0;B1B1J0;B1B1I8;B1B1I9;P26367-2;P26367	PAX6_HUMAN	PAX6	Paired box protein Pax-6
22.6477	NaN	K7EL99	K7EL99	K7EL99_HUMAN	TBCB	Isoform of Q99426, Tubulin folding cofactor B (Fragment)
22.6482	23.8976	O94955	O94955	RHBT3_HUMAN	RHOBTB3	Rho-related BTB domain-containing protein 3
22.6536	22.9932	Q8TB72-4	Q8TB72-3;Q8TB72-4;A0A0C4DG68	PUM2_HUMAN	PUM2	Isoform of Q8TB72, Isoform 4 of Pumilio homolog 2
22.6567	23.5721	O94782	C9JC88;O94782	UBP1_HUMAN	USP1	Ubiquitin carboxyl-terminal hydrolase 1
22.6604	23.1211	Q9Y251;Q9Y251-2;Q9Y251-3	D6RHG4;D6RAQ1;A0A7P0TBD9;Q9Y251-2;Q9Y251-3;Q9Y251-4;Q9Y251	HPSE_HUMAN	HPSE	Heparanase
22.667	22.8672	O43184;O43184-2;O43184-3;O43184-4	Q5JRP2;O43184-2;O43184-3;O43184-4;O43184	ADA12_HUMAN	ADAM12	Disintegrin and metalloproteinase domain-containing protein 12
22.6671	22.7923	Q8NC69	F5H7I0;Q8NC69	KCTD6_HUMAN	KCTD6	BTB/POZ domain-containing protein KCTD6
22.6709	21.8738	O15550	A0A6Q8PFK0;A0A6Q8PFD0;A0A6Q8PG92;A0A6Q8PG32;A0A6Q8PGN0;A0A6Q8PGG6;A0A6Q8PH94;A0A6Q8PHJ0;A0A6Q8PHB6;F8W8R6;A0A804HIZ7;A0A804HLJ3;A0A804HJA2;A0A087X0R0;A0A087WUN6;F5H6S1;F5H5V6;O15550	KDM6A_HUMAN	KDM6A	Lysine-specific demethylase 6A
22.6742	22.805	P06753	A0A2R8Y5V9;P06753-6;A0A2R8YHD2;A0A494C034;A0A2R2Y2Q3;P06753	TPM3_HUMAN	TPM3	Tropomyosin alpha-3 chain
22.6849	22.0186	Q8WYH8;Q8WYH8-2	A0A1B0GW41;E9PEN0;Q8WYH8-2;Q8WYH8	ING5_HUMAN	ING5	Inhibitor of growth protein 5
22.6855	NaN	Q5S007	E9PC85;A0A7P0T8S1;C9JBF0;A0A7P0Z468;Q5S007	LRRK2_HUMAN	LRRK2	Leucine-rich repeat serine/threonine-protein kinase 2
22.6872	22.7678	Q9NRZ7;Q9NRZ7-2;Q9NRZ7-3	Q9NRZ7-3;Q9NRZ7-2;Q9NRZ7	PLCC_HUMAN	AGPAT3	1-acyl-sn-glycerol-3-phosphate acyltransferase gamma
22.6898	NaN	Q9UKL3	A0A087WTW5;Q9UKL3	C8AP2_HUMAN	CASP8AP2	CASP8-associated protein 2
22.6916	20.3799	Q6ZUT1;Q6ZUT1-2;Q6ZUT1-3	Q6ZUT1-2;Q6ZUT1-3;E9PSC8;E9PQL5;E9PKA8;Q6ZUT1	NKAP1_HUMAN	NKAPD1	Uncharacterized protein NKAPD1
22.6949	23.5326	Q02086;Q02086-2	Q02086-2;Q02086	SP2_HUMAN	SP2	Transcription factor Sp2
22.698	22.8217	Q92543;Q92543-2	Q92543-2;E9PLV3;Q92543	SNX19_HUMAN	SNX19	Sorting nexin-19
22.7017	24.012	E7EQJ0	E7EQJ0	E7EQJ0_HUMAN	HNRNPH1	Isoform of P31943, Heterogeneous nuclear ribonucleoprotein H1 (Fragment)
22.705	22.2773	Q53FV1;Q8N138;Q8N138-4;Q9P0S3	J3KTF9;Q8N138-4;F6WST4;F8VXD5;A0A1B0GXE7;J3QRM9;Q53FV1;Q8N138;Q9P0S3	ORML1_HUMAN;ORML2_HUMAN;ORML3_HUMAN	ORMDL1;ORMDL2;ORMDL3	ORM1-like protein 2
22.7168	24.0789	Q8WVX3;Q8WVX3-2	Q8WVX3-2;Q8WVX3	CD003_HUMAN	C4orf3	Uncharacterized protein C4orf3
22.7176	25.5314	F8W726;Q5VU77	F8W726;Q5VU77	F8W726_HUMAN;Q5VU77_HUMAN	UBAP2L	Isoform of Q14157, Ubiquitin associated protein 2 like
22.7196	22.0559	A0A0D9SFE4	A0A0D9SFE4	A0A0D9SFE4_HUMAN	DNM1	Isoform of Q05193, dynamin GTPase
22.724	23.5742	P32189;P32189-1;P32189-2;P32189-4	F8WDA9;F8WBI8;F8WC39;P32189-1;P32189-2;P32189-4;A6NP46;A0A8I5KXY7;Q14410;P32189	GLPK_HUMAN	GK	Glycerol kinase
22.7333	22.321	Q96DR4	Q96DR4-2;D6REN7;D6RDM5;Q96DR4	STAR4_HUMAN	STARD4	StAR-related lipid transfer protein 4
22.7376	24.4905	H0Y459	H0Y459	H0Y459_HUMAN	NCOR1	Isoform of O75376, Nuclear receptor corepressor 1
22.7467	22.4258	Q9UIS9-12	A0A0A0MS90;K7EN65;Q9UIS9-5;Q9UIS9-7;Q9UIS9-9;A0A994J7H0;Q9UIS9-10;Q9UIS9-12;Q9UIS9	MBD1_HUMAN	MBD1	Isoform of Q9UIS9, Isoform 12 of Methyl-CpG-binding domain protein 1
22.7503	21.332	P35555	P35555	FBN1_HUMAN	FBN1	Fibrillin-1
22.7523	23.6462	P24311	A0A3B3ITX0;A0A3B3IRN8;P24311	COX7B_HUMAN	COX7B	Cytochrome c oxidase subunit 7B, mitochondrial
22.7574	25.831	Q66LE6	H0YB06;A0A3B3IRK1;Q66LE6	2ABD_HUMAN	PPP2R2D	Serine/threonine-protein phosphatase 2A 55 kDa regulatory subunit B delta isoform
22.7619	20.5415	Q9BQK8;Q9BQK8-2	Q9BQK8-2;H0Y5E1;Q9BQK8	LPIN3_HUMAN	LPIN3	Phosphatidate phosphatase LPIN3
22.7679	19.1494	Q92994;Q92994-5;Q92994-7;Q92994-8	Q92994-3;Q92994-5;Q92994-7;Q92994-8;Q92994-9;Q92994	TF3B_HUMAN	BRF1	Transcription factor IIIB 90 kDa subunit
22.7687	20.434	Q5JVL4;Q5JVL4-3	A0A1B0GVB0;A0A1B0GUV2;A0A1B0GUP6;A0A1B0GTV6;A0A1B0GTM7;A0A1B0GU13;A0A1B0GTB1;A0A1B0GTD7;A0A1B0GTF7;A0A1B0GTH2;A0A1B0GWB3;A0A1B0GVP6;A0A1C7CYY1;Q5JVL4-2;Q5JVL4-3;Q5JVL4	EFHC1_HUMAN	EFHC1	EF-hand domain-containing protein 1
22.772	22.0235	P28562	P28562	DUS1_HUMAN	DUSP1	Dual specificity protein phosphatase 1
22.7767	23.4431	Q9UQ53;Q9UQ53-2;Q9UQ53-3	Q9UQ53-2;Q9UQ53-3;H0YB84;H0YB89;H0YC13;Q9UQ53	MGT4B_HUMAN	MGAT4B	Alpha-1,3-mannosyl-glycoprotein 4-beta-N-acetylglucosaminyltransferase B
22.7781	23.8166	A0A804HIR9;A0A804HKQ1	A0A804HIR9;A0A804HKQ1	A0A804HIR9_HUMAN;A0A804HKQ1_HUMAN	MYCBP2	Isoform of O75592, RCR-type E3 ubiquitin transferase
22.7796	NaN	P53805;P53805-2;P53805-3	E9PD55;E9PDJ2;P53805-2;P53805-3;P53805-4;P53805	RCAN1_HUMAN	RCAN1	Calcipressin-1
22.7809	22.0767	O60268;O60268-3	H3BNA7;O60268-3;O60268	K0513_HUMAN	KIAA0513	Uncharacterized protein KIAA0513
22.7855	18.6676	Q6ZN54;Q6ZN54-2;Q6ZN54-3;Q6ZN54-4;Q6ZN54-5;Q6ZN54-6	H3BTS7;H3BT01;H3BSH6;H3BT87;H3BQH5;H3BRA7;H3BQX9;H3BMT5;H3BMP4;Q6ZN54-5;Q6ZN54-6;Q6ZN54-2;Q6ZN54-3;Q6ZN54-4;Q6ZN54	DEFI8_HUMAN	DEF8	Differentially expressed in FDCP 8 homolog
22.7898	23.5577	Q9C093;Q9C093-2	Q9C093-2;D6REZ4;A0A1B0GWD8;Q9C093	SPEF2_HUMAN	SPEF2	Sperm flagellar protein 2
22.7919	22.1766	O14770-5	O14770-2;O14770-3;O14770-4;O14770-5;O14770-6;O14770-7;O14770-8;H0YKN2;H0YKE5;A0A8V8TQU6;A0A8V8TPB7;A0A8V8TPM6;U3KQ95;U3KQI2;O14770	MEIS2_HUMAN	MEIS2	Isoform of O14770, Isoform 5 of Homeobox protein Meis2
22.7928	22.9023	Q7Z5N4;Q7Z5N4-3	F8W6X9;Q7Z5N4-3;Q7Z5N4	SDK1_HUMAN	SDK1	Protein sidekick-1
22.7945	22.7578	Q9BW30	Q9BW30	TPPP3_HUMAN	TPPP3	Tubulin polymerization-promoting protein family member 3
22.8006	22.0919	P27987	P27987-2;P27987	IP3KB_HUMAN	ITPKB	Inositol-trisphosphate 3-kinase B
22.8059	24.869	P43003;P43003-2	P43003-2;A0A7P0TAG7;A0A7P0Z4R4;A0A087X0U3;A0A087WT87;P43003	EAA1_HUMAN	SLC1A3	Excitatory amino acid transporter 1
22.817	23.2962	P13497;P13497-2;P13497-5;P13497-6	P13497-2;P13497-4;P13497-5;P13497-6;P13497	BMP1_HUMAN	BMP1	Bone morphogenetic protein 1
22.8205	22.1799	Q8N0Y2;Q8N0Y2-2	Q8N0Y2-2;Q8N0Y2	ZN444_HUMAN	ZNF444	Zinc finger protein 444
22.8207	23.2042	Q8N3R3;Q8N3R3-4	Q8N3R3-4;Q8N3R3	TCAIM_HUMAN	TCAIM	T-cell activation inhibitor, mitochondrial
22.8218	23.6922	Q8N1G1	Q8N1G1	REXO1_HUMAN	REXO1	RNA exonuclease 1 homolog
22.8227	23.5023	Q7Z794	Q7Z794	K2C1B_HUMAN	KRT77	Keratin, type II cytoskeletal 1b
22.8228	23.8313	Q15911	Q15911-2;Q15911	ZFHX3_HUMAN	ZFHX3	Zinc finger homeobox protein 3
22.8256	NaN	O00488	O00488	ZN593_HUMAN	ZNF593	Zinc finger protein 593
22.8413	24.5622	Q96FN9	Q96FN9	DTD2_HUMAN	DTD2	D-aminoacyl-tRNA deacylase 2
22.8416	22.6537	Q86XP1;Q86XP1-2;Q86XP1-3;Q86XP1-5	A0A0D9SFR6;Q86XP1-2;Q86XP1-3;Q86XP1-5;Q86XP1	DGKH_HUMAN	DGKH	Diacylglycerol kinase eta
22.8417	22.0924	P31629	A0A994J742;A0A994J481;P31629	ZEP2_HUMAN	HIVEP2	Transcription factor HIVEP2
22.8421	24.4213	H0Y400	H0Y400	H0Y400_HUMAN	DDX39B	Isoform of Q13838, DExD-box helicase 39B (Fragment)
22.8504	21.4199	Q7Z388	Q7Z388	D19L4_HUMAN	DPY19L4	Probable C-mannosyltransferase DPY19L4
22.8504	23.4472	Q9NS56;Q9NS56-2	Q9NS56-2;Q9NS56	TOPRS_HUMAN	TOPORS	E3 ubiquitin-protein ligase Topors
22.8582	24.1588	Q9Y421;Q9Y421-2;Q9Y421-3	K7EIY1;K7ELZ8;K7ENN5;Q9Y421-2;Q9Y421-3;Q9Y421	FA32A_HUMAN	FAM32A	Protein FAM32A
22.8608	NaN	Q49A88;Q49A88-2;Q49A88-3;Q49A88-4;Q49A88-6	C9JSI8;A0A0A0MR27;Q49A88-2;Q49A88-3;Q49A88-4;Q49A88-6;J3QT39;Q49A88	CCD14_HUMAN	CCDC14	Coiled-coil domain-containing protein 14
22.8636	22.6123	Q9NX61;Q9NX61-2	U3KQT6;K7EQ34;K7EPA3;K7EQE7;Q9NX61-2;Q9NX61	T161A_HUMAN	TMEM161A	Transmembrane protein 161A
22.8838	26.5453	O75071	A0A804H3B5;A0A6I8PIP2;A0A6I8PIF8;A0A6I8PU78;O75071	EFC14_HUMAN	EFCAB14	EF-hand calcium-binding domain-containing protein 14
22.8853	22.2621	Q9H6A9	Q9H6A9-2;Q9H6A9	PCX3_HUMAN	PCNX3	Pecanex-like protein 3
22.8929	21.4443	Q6JQN1;Q6JQN1-2;Q6JQN1-5	F8W0Q4;F8W179;F8W1I9;Q6JQN1-2;Q6JQN1-5;Q6JQN1	ACD10_HUMAN	ACAD10	Acyl-CoA dehydrogenase family member 10
22.897	21.7164	O75054;O75054-2	O75054-2;O75054	IGSF3_HUMAN	IGSF3	Immunoglobulin superfamily member 3
22.904	24.3836	O43167	A0A8V8TNA6;A0A8V8TNL7;A0A8V8TLS8;A0A8V8TLT3;A0A8V8TLV5;A0A8V8TMC2;O43167-2;O43167	ZBT24_HUMAN	ZBTB24	Zinc finger and BTB domain-containing protein 24
22.9044	24.8529	O14925	Q5SRD1-2;O14925;Q5SRD1	TIM23_HUMAN	TIMM23	Mitochondrial import inner membrane translocase subunit Tim23
22.9156	23.3729	P61218	B0QYL8;B0QYL9;F8WC47;U3KQB0;U3KPY1;U3KQS8;P61218	RPAB2_HUMAN	POLR2F	DNA-directed RNA polymerases I, II, and III subunit RPABC2
22.9175	22.8276	A6H8Y1;A6H8Y1-2;A6H8Y1-3;A6H8Y1-4;A6H8Y1-5;A6H8Y1-6;A6H8Y1-7	A6H8Y1-2;A6H8Y1-3;A6H8Y1-4;A6H8Y1-5;A6H8Y1-6;A6H8Y1-7;A0A0G2JNU3;A6H8Y1	BDP1_HUMAN	BDP1	Transcription factor TFIIIB component B'' homolog
22.9199	22.2017	Q9UHJ3	Q9UHJ3	SMBT1_HUMAN	SFMBT1	Scm-like with four MBT domains protein 1
22.9226	23.1108	Q2TB10	Q2TB10	ZN800_HUMAN	ZNF800	Zinc finger protein 800
22.9261	23.3426	Q9NYQ6	Q9NYQ6-2;H0Y7R9;A0A6I8PRU0;Q9NYQ6	CELR1_HUMAN	CELSR1	Cadherin EGF LAG seven-pass G-type receptor 1
22.9295	22.3247	Q9Y6X3	V9GYS3;Q9Y6X3	SCC4_HUMAN	MAU2	MAU2 chromatid cohesion factor homolog
22.9297	22.3969	Q13402-5	A0A590UJ94;B9A012;H7C4D8;Q13402-2;Q13402-3;Q13402-4;Q13402-5;Q13402-6;Q13402-7;Q13402-8;Q13402	MYO7A_HUMAN	MYO7A	Isoform of Q13402, Isoform 5 of Unconventional myosin-VIIa
22.93	25.1178	Q9UPU9;Q9UPU9-3	Q9UPU9-2;Q9UPU9-3;Q9UPU9	SMAG1_HUMAN	SAMD4A	Protein Smaug homolog 1
22.9333	21.6913	Q8TEJ3	Q8TEJ3	SH3R3_HUMAN	SH3RF3	E3 ubiquitin-protein ligase SH3RF3
22.9404	25.5376	Q14119	J9JIC7;J3QSH4;Q14119	VEZF1_HUMAN	VEZF1	Vascular endothelial zinc finger 1
22.9442	25.4697	O43286	O43286	B4GT5_HUMAN	B4GALT5	Beta-1,4-galactosyltransferase 5
22.945	26.59	P84022	P84022-2;P84022-3;P84022-4;H3BQ00;P84022	SMAD3_HUMAN	SMAD3	Mothers against decapentaplegic homolog 3
22.9466	NaN	O00267	M0QYL9;O00267	SPT5H_HUMAN	SUPT5H	Transcription elongation factor SPT5
22.9482	NaN	Q330K2;Q330K2-2	A0A075B6P0;Q330K2-2;E5RFN5;Q330K2	NDUF6_HUMAN	NDUFAF6	NADH dehydrogenase (ubiquinone) complex I, assembly factor 6
22.949	NaN	H0YLF3	H0YLF3	H0YLF3_HUMAN	B2M	Isoform of P61769, Beta-2-microglobulin (Fragment)
22.951	25.1957	Q8N6S4	Q8N6S4	AN13C_HUMAN	ANKRD13C	Ankyrin repeat domain-containing protein 13C
22.9537	24.9288	Q8N2H4	E7ETM6;Q8N2H4	SYS1_HUMAN	SYS1	Protein SYS1 homolog
22.9543	19.2049	Q9Y2D8;Q9Y2D8-2;Q9Y2D8-3	Q9Y2D8-2;Q9Y2D8-3;S4R403;Q9Y2D8	ADIP_HUMAN	SSX2IP	Afadin- and alpha-actinin-binding protein
22.9548	21.4477	P53671-3	B5MC51;P53671-2;P53671-3;P53671	LIMK2_HUMAN	LIMK2	Isoform of P53671, Isoform 3 of LIM domain kinase 2
22.9707	23.5283	P23297	Q5T7Y6;P23297	S10A1_HUMAN	S100A1	Protein S100-A1
22.9747	25.989	Q8TCD1	Q8TCD1	CR032_HUMAN	C18orf32	UPF0729 protein C18orf32
22.9779	23.929	Q8TAQ2-2;Q8TAQ2-3	F8VXC8;Q8TAQ2-2;Q8TAQ2-3	SMRC2_HUMAN	SMARCC2	Isoform of Q8TAQ2, Isoform 2 of SWI/SNF complex subunit SMARCC2
22.9862	21.5894	O43164;O43164-2	O43164-2;O43164	PJA2_HUMAN	PJA2	E3 ubiquitin-protein ligase Praja-2
22.9874	22.4646	Q9NQS3	Q9NQS3-2;Q9NQS3-3;Q9NQS3	NECT3_HUMAN	NECTIN3	Nectin-3
22.9938	NaN	Q5U5Q3	A0A6Q8PG18;Q6ZN04;Q5U5Q3	MEX3C_HUMAN	MEX3C	RNA-binding E3 ubiquitin-protein ligase MEX3C
22.9982	19.3823	Q9H3U5;Q9H3U5-3;Q9H3U5-5;Q9H3U5-6	Q9H3U5-3;Q9H3U5-4;Q9H3U5-5;Q9H3U5-6;A0A494C105;Q9H3U5	MFSD1_HUMAN	MFSD1	Major facilitator superfamily domain-containing protein 1
23.0013	19.2468	P41212	P41212	ETV6_HUMAN	ETV6	Transcription factor ETV6
23.0036	22.2317	B7ZAQ6;B7ZAQ6-2;B7ZAQ6-3;P0CG08	B7ZAQ6-2;B7ZAQ6-3;P0CG08;B7ZAQ6	GPHRA_HUMAN;GPHRB_HUMAN	GPR89A;GPR89B	Golgi pH regulator A
23.0055	23.5449	Q8IXL7;Q8IXL7-2	H0YFW5;Q8IXL7-2;F5H7C4;F5H6G9;F5H199;Q8IXL7	MSRB3_HUMAN	MSRB3	Methionine-R-sulfoxide reductase B3
23.0098	24.3266	P00749;P00749-2	E7ET40;P00749-2;P00749	UROK_HUMAN	PLAU	Urokinase-type plasminogen activator
23.0118	20.7006	Q969U6;Q969U6-2	A0A096LNM2;Q969U6-2;Q969U6	FBXW5_HUMAN	FBXW5	F-box/WD repeat-containing protein 5
23.0148	22.5591	P33764	P33764	S10A3_HUMAN	S100A3	Protein S100-A3
23.0148	25.0701	Q9P246;Q9P246-2	A0A1X7SBY3;H0Y860;Q9P246-2;A0A8V8TMC8;Q9P246	STIM2_HUMAN	STIM2	Stromal interaction molecule 2
23.0188	24.5972	Q96EW2;Q96EW2-3	Q96EW2-3;Q96EW2	HBAP1_HUMAN	HSPBAP1	HSPB1-associated protein 1
23.0384	24.4526	Q9NQ31;Q9NQ31-2;Q9NQ31-3	B4DGE2;E9PNI1;E9PN38;Q9NQ31-2;Q9NQ31-3;Q9NQ31	AKIP1_HUMAN	AKIP1	A-kinase-interacting protein 1
23.0409	24.7221	Q8IVF7;Q8IVF7-2;Q8IVF7-3	Q8IVF7-2;Q8IVF7-3;F8W1F5;Q8IVF7	FMNL3_HUMAN	FMNL3	Formin-like protein 3
23.0425	21.1387	P16885	A0A8V8TMG4;A0A8V8TL51;P16885	PLCG2_HUMAN	PLCG2	1-phosphatidylinositol 4,5-bisphosphate phosphodiesterase gamma-2
23.0476	23.2578	Q86VW0	H0Y774;Q86VW0	SESD1_HUMAN	SESTD1	SEC14 domain and spectrin repeat-containing protein 1
23.0574	20.7869	Q8IV20	Q8IV20	LACC1_HUMAN	LACC1	Purine nucleoside phosphorylase LACC1
23.0574	22.8815	Q5SVZ6	Q5SVZ6	ZMYM1_HUMAN	ZMYM1	Zinc finger MYM-type protein 1
23.0637	23.8801	P08567	P08567	PLEK_HUMAN	PLEK	Pleckstrin
23.065	22.4704	Q8IXU6;Q8IXU6-3	Q8IXU6-3;Q8IXU6	S35F2_HUMAN	SLC35F2	Solute carrier family 35 member F2
23.0661	23.9679	H0Y7U4	H0Y7U4	H0Y7U4_HUMAN	THOC2	Isoform of Q8NI27, THO complex subunit 2 (Fragment)
23.0669	24.3334	Q68D85	Q68D85	NR3L1_HUMAN	NCR3LG1	Natural cytotoxicity triggering receptor 3 ligand 1
23.0682	22.5962	Q9P2B7	A0A3B3IRJ5;Q9P2B7-2;Q9P2B7	CFA97_HUMAN	CFAP97	Cilia- and flagella-associated protein 97
23.0745	22.1681	O75379;O75379-2	O75379-2;O75379	VAMP4_HUMAN	VAMP4	Vesicle-associated membrane protein 4
23.0824	25.6578	Q15070;Q15070-2	J3KNA0;E7EVY0;A0A087X0L7;Q15070-2;Q15070	OXA1L_HUMAN	OXA1L	Mitochondrial inner membrane protein OXA1L
23.0881	23.5454	P51956;P51956-2	P51956-2;A0A087WY58;P51956	NEK3_HUMAN	NEK3	Serine/threonine-protein kinase Nek3
23.0914	22.5308	Q15390;Q15390-2	H0YBZ4;Q15390-2;Q15390	MTFR1_HUMAN	MTFR1	Mitochondrial fission regulator 1
23.1026	24.1047	Q7Z3B3	A0A1W2PPV8;A0A1W2PRB5;A0A0J9YVS1;A0A0G2JQF4;A0A0G2JQF5;A0A0G2JNT7;A0A0G2JNB1;A0A3B3IT55;I3L233;Q7Z3B3	KANL1_HUMAN	KANSL1	KAT8 regulatory NSL complex subunit 1
23.1042	19.5567	Q13033	H0YJZ4;Q13033	STRN3_HUMAN	STRN3	Striatin-3
23.106	24.5513	Q8N5G2	Q8N5G2-2;Q8N5G2-3;Q8N5G2	MACOI_HUMAN	MACO1	Macoilin
23.1109	24.6855	Q96DX7	Q96DX7	TRI44_HUMAN	TRIM44	Tripartite motif-containing protein 44
23.113	22.3923	P46087-3	P46087-2;P46087-3;F5H5X6	NOP2_HUMAN	NOP2	Isoform of P46087, Isoform 3 of Probable 28S rRNA (cytosine(4447)-C(5))-methyltransferase
23.1186	25.5762	Q8N9M5	Q8N9M5	TM102_HUMAN	TMEM102	Transmembrane protein 102
23.1246	21.7799	P07199	P07199	CENPB_HUMAN	CENPB	Major centromere autoantigen B
23.1335	23.5586	Q6PML9	Q6PML9	ZNT9_HUMAN	SLC30A9	Proton-coupled zinc antiporter SLC30A9, mitochondrial
23.1402	20.5979	Q9BRX9	Q9BRX9	WDR83_HUMAN	WDR83	WD repeat domain-containing protein 83
23.1492	22.2515	U3KQ93	U3KQ93	U3KQ93_HUMAN	UBA2	Isoform of Q9UBT2, Ubiquitin like modifier activating enzyme 2
23.1493	22.1655	O15265;O15265-2	O15265-2;A0A2R8YDD6;O15265	ATX7_HUMAN	ATXN7	Ataxin-7
23.1504	18.3738	Q4AC94	H0YG44;A0A7P0T8E9;A0A7P0T995;A0A7P0T8V8;A0A7P0T883;A0A7P0TAM9;Q4AC94-1;Q4AC94-2;Q4AC94-3;Q4AC94-4;H7BZB4;A0A7P0Z4H1;A0A7P0Z4J2;A0A7P0Z475;Q4AC94	C2CD3_HUMAN	C2CD3	C2 domain-containing protein 3
23.1558	20.8265	A7E2Y1	A0A6E1W127;A7E2Y1	MYH7B_HUMAN	MYH7B	Myosin-7B
23.1578	23.0206	Q93073	Q93073-2;Q93073	SBP2L_HUMAN	SECISBP2L	Selenocysteine insertion sequence-binding protein 2-like
23.1681	NaN	Q2TB18;Q2TB18-2	D6RG30;Q2TB18-2;Q2TB18	ASTE1_HUMAN	ASTE1	Protein asteroid homolog 1
23.1766	26.0257	P06702	P06702	S10A9_HUMAN	S100A9	Protein S100-A9
23.1772	19.0069	Q8N465	B5MCV2;H7C0N1;Q8N465	D2HDH_HUMAN	D2HGDH	D-2-hydroxyglutarate dehydrogenase, mitochondrial
23.1839	21.3877	O43155	A0A804HKH2;O43155	FLRT2_HUMAN	FLRT2	Leucine-rich repeat transmembrane protein FLRT2
23.185	22.9322	Q9BVG9	E9PS47;E9PLE4;Q9BVG9	PTSS2_HUMAN	PTDSS2	Phosphatidylserine synthase 2
23.1875	23.065	Q8IXJ9	A0A2R8Y5U1;A0A494C1R1;Q76L82;Q8IXJ9	ASXL1_HUMAN	ASXL1	Polycomb group protein ASXL1
23.1891	22.0018	O15527;O15527-2;O15527-3;O15527-4;O15527-7;O15527-8	H7BZM3;H7C1V7;O15527-2;O15527-3;O15527-4;O15527-7;O15527-8;O15527	OGG1_HUMAN	OGG1	N-glycosylase/DNA lyase
23.1924	24.6615	Q13105;Q13105-2;Q13105-3	Q13105-2;Q13105-3;Q13105	ZBT17_HUMAN	ZBTB17	Zinc finger and BTB domain-containing protein 17
23.1926	23.4467	Q9ULI3	A0A994J6K3;Q9ULI3	HEG1_HUMAN	HEG1	Protein HEG homolog 1
23.1936	20.8174	P0C1Z6;P0C1Z6-2	A8MTQ3;P0C1Z6-2;A0A0G2JP55;P0C1Z6	TFPT_HUMAN	TFPT	TCF3 fusion partner
23.1984	24.1955	Q08426;Q08426-2	Q08426-2;Q08426	ECHP_HUMAN	EHHADH	Peroxisomal bifunctional enzyme
23.1995	20.9975	O00139;O00139-1;O00139-4;O00139-5	A0A6Q8PG37;A0A6Q8PGG1;D6R9M0;O00139-5;O00139-1;O00139-4;O00139	KIF2A_HUMAN	KIF2A	Kinesin-like protein KIF2A
23.2041	22.5095	Q9H694	Q9H694-2;A6NGY7;Q9H694	BICC1_HUMAN	BICC1	Protein bicaudal C homolog 1
23.2057	23.8143	Q14542;Q14542-3	Q14542-3;Q14542-4;Q14542	S29A2_HUMAN	SLC29A2	Equilibrative nucleoside transporter 2
23.221	24.1619	Q8WUN7	Q8WUN7	UBTD2_HUMAN	UBTD2	Ubiquitin domain-containing protein 2
23.2241	24.5958	P49760;P49760-3	P49760-3;B1AVT0;P49760	CLK2_HUMAN	CLK2	Dual specificity protein kinase CLK2
23.226	22.9573	P31944	P31944	CASPE_HUMAN	CASP14	Caspase-14
23.23	24.0675	Q9Y5Z7	Q9Y5Z7	HCFC2_HUMAN	HCFC2	Host cell factor 2
23.234	23.6125	Q9BQ48	M0R226;Q9BQ48	RM34_HUMAN	MRPL34	Large ribosomal subunit protein bL34m
23.24	22.6898	O76095;O76095-2	O76095-2;O76095	JTB_HUMAN	JTB	Protein JTB
23.2435	25.0793	Q14568	Q14568	HS902_HUMAN	HSP90AA2P	Heat shock protein HSP 90-alpha A2
23.2551	23.4108	Q9BSI4-2	H0YLC9;B4DFJ1;A0A8V8TQE2;A0A8V8TQ07;A0A8V8TNU6;Q9BSI4-2;Q9BSI4	TINF2_HUMAN	TINF2	Isoform of Q9BSI4, Isoform 2 of TERF1-interacting nuclear factor 2
23.2633	23.6889	O95081	O95081-2;A0A0C4DG34;O95081	AGFG2_HUMAN	AGFG2	Arf-GAP domain and FG repeat-containing protein 2
23.2635	23.7411	Q86VQ1	Q86VQ1	GLCI1_HUMAN	GLCCI1	Glucocorticoid-induced transcript 1 protein
23.2637	24.3015	Q96K76-2	Q96K76-2	UBP47_HUMAN	USP47	Isoform of Q96K76, Isoform 2 of Ubiquitin carboxyl-terminal hydrolase 47
23.2688	24.3491	Q96EX1	Q96EX1	SIM12_HUMAN	SMIM12	Small integral membrane protein 12
23.2752	24.9982	P15822	F5H212;P15822	ZEP1_HUMAN	HIVEP1	Zinc finger protein 40
23.2831	20.8332	A0A0M3HER3	A0A0M3HER3	A0A0M3HER3_HUMAN	TRIM47	Isoform of Q96LD4, Tripartite motif containing 47 (Fragment)
23.2847	23.719	Q7Z412;Q7Z412-2	Q7Z412-2;E9PRC5;Q7Z412	PEX26_HUMAN	PEX26	Peroxisome assembly protein 26
23.2951	23.8751	Q8TEW0-9	Q8TEW0-10;Q5VWU8;F5GZI3;Q8TEW0-8;Q8TEW0-9	PARD3_HUMAN	PARD3	Isoform of Q8TEW0, Isoform 9 of Partitioning defective 3 homolog
23.2977	23.6445	Q16600	Q16600	ZN239_HUMAN	ZNF239	Zinc finger protein 239
23.2981	22.6005	P15882;P15882-3	P15882-3;A0A494C0V1;A0A494C1D3;P15882	CHIN_HUMAN	CHN1	N-chimaerin
23.3126	23.3926	Q6ZNA5;Q6ZNA5-2	Q6ZNA5-2;Q6ZNA5	FRRS1_HUMAN	FRRS1	Ferric-chelate reductase 1
23.3136	23.0004	P62341	F6U0C2;P62341	SELT_HUMAN	SELENOT	Thioredoxin reductase-like selenoprotein T
23.3145	20.9104	Q92570;Q92570-3	Q92570-3;Q92570	NR4A3_HUMAN	NR4A3	Nuclear receptor subfamily 4 group A member 3
23.3173	23.1009	Q9NRA0;Q9NRA0-2;Q9NRA0-4;Q9NRA0-5	Q9NRA0-2;Q9NRA0-4;Q9NRA0-5;M0R344;E9PCV4;Q9NRA0	SPHK2_HUMAN	SPHK2	Sphingosine kinase 2
23.3174	24.2897	E9PEW8	E9PEW8	E9PEW8_HUMAN	HBD	Isoform of P02042, Hemoglobin subunit delta (Fragment)
23.3176	23.6085	Q5T7W7	Q5T7W7-2;Q5T7W7	TSTD2_HUMAN	TSTD2	Thiosulfate sulfurtransferase/rhodanese-like domain-containing protein 2
23.3213	25.2612	A0A7P0T9I3;A0A994J506;A0A994J509	A0A7P0T9I3;A0A994J506;A0A994J509	A0A7P0T9I3_HUMAN;A0A994J506_HUMAN;A0A994J509_HUMAN	MBNL2	Isoform of Q5VZF2, Muscleblind like splicing regulator 2
23.3337	20.3572	Q86XK2;Q86XK2-3;Q86XK2-5;Q86XK2-6	C9IYF0;Q86XK2-3;Q86XK2-4;Q86XK2-5;Q86XK2-6;A0A804HK63;Q86XK2	FBX11_HUMAN	FBXO11	F-box only protein 11
23.3352	22.8394	Q9BVV7	J3QRI1;Q9BVV7	TIM21_HUMAN	TIMM21	Mitochondrial import inner membrane translocase subunit Tim21
23.3411	22.9389	O75864	O75864-2;O75864	PPR37_HUMAN	PPP1R37	Protein phosphatase 1 regulatory subunit 37
23.3503	22.9449	Q14168;Q14168-2;Q14168-3;Q14168-4;Q14168-6	D3DX48;D3DX49;Q14168-6;Q14168-2;Q14168-3;Q14168-4;Q14168-5;B4DZ84;A0A0C4DH75;A0A0A0MRU0;A0A087WVY2;E5RI47;Q14168	MPP2_HUMAN	MPP2	MAGUK p55 subfamily member 2
23.3522	24.3424	Q7L7V1;Q7L7V1-2	Q7L7V1-2;Q7L7V1	DHX32_HUMAN	DHX32	Putative pre-mRNA-splicing factor ATP-dependent RNA helicase DHX32
23.3526	24.1426	Q9UIU6	G3V2N2;Q9UIU6	SIX4_HUMAN	SIX4	Homeobox protein SIX4
23.3546	24.6265	Q6N021	E7EQS8;Q6N021	TET2_HUMAN	TET2	Methylcytosine dioxygenase TET2
23.3589	22.7304	Q969T3	Q5JZH3;Q969T3	SNX21_HUMAN	SNX21	Sorting nexin-21
23.3659	26.1147	Q5TCS8;Q5TCS8-1;Q5TCS8-3;Q5TCS8-6	J3KP89;F8W6I9;Q5TCS8-1;Q5TCS8-3;Q5TCS8-6;E9PP91;E9PIL2;Q8N9B4;Q5TCS8	KAD9_HUMAN	AK9	Adenylate kinase 9
23.3691	23.3084	Q86WX3	Q86WX3	AROS_HUMAN	RPS19BP1	Active regulator of SIRT1
23.3693	24.3747	Q8WV44	Q8WV44-3;Q8WV44	TRI41_HUMAN	TRIM41	E3 ubiquitin-protein ligase TRIM41
23.3716	21.5884	O00287	O00287	RFXAP_HUMAN	RFXAP	Regulatory factor X-associated protein
23.3739	21.4928	Q8WVD3	Q8WVD3-2;J3QLQ3;Q8WVD3	RN138_HUMAN	RNF138	E3 ubiquitin-protein ligase RNF138
23.3786	21.6136	Q14164	Q14164-2;A0A075B7B4;Q14164	IKKE_HUMAN	IKBKE	Inhibitor of nuclear factor kappa-B kinase subunit epsilon
23.3833	23.3211	Q9NUQ2	Q9NUQ2	PLCE_HUMAN	AGPAT5	1-acyl-sn-glycerol-3-phosphate acyltransferase epsilon
23.3842	23.8122	P05090	C9JX71;C9JF17;P05090	APOD_HUMAN	APOD	Apolipoprotein D
23.3945	24.575	O94854	O94854;A0A804HL78;A0A0A6YYJ5	K0754_HUMAN	MACF1	Isoform of Q9UPN3, Microtubule-actin cross-linking factor 1, isoforms 6/7
23.3951	24.7874	O95298	O95298-2;E9PRJ5;O95298	NDUC2_HUMAN	NDUFC2	NADH dehydrogenase [ubiquinone] 1 subunit C2
23.3967	23.7261	P15529-16	P15529-16;P15529-2;P15529-3;P15529-4;P15529-5;P15529-6;P15529-7;R4GN18	MCP_HUMAN	CD46	Isoform of P15529, Isoform 3 of Membrane cofactor protein
23.4015	19.4906	O43257	O43257	ZNHI1_HUMAN	ZNHIT1	Zinc finger HIT domain-containing protein 1
23.4116	22.9236	G5EA36;I3L328	G5EA36;I3L328	G5EA36_HUMAN;I3L328_HUMAN	CDC27	Isoform of P30260, Cell division cycle 27
23.4149	22.8295	A0A1B0GUI1;A0A7P0TAR5	A0A1B0GUI1;A0A7P0TAR5	A0A1B0GUI1_HUMAN;A0A7P0TAR5_HUMAN	RALGAPA1	Isoform of Q6GYQ0, Ral GTPase activating protein catalytic subunit alpha 1
23.4206	21.5908	Q9NYM9	H7BXT7;B8ZZS0;E9PHY4;A0A0C4DH16;Q9NYM9	BET1L_HUMAN	BET1L	BET1-like protein
23.426	23.6925	Q9NQ86;Q9NQ86-4	Q9NQ86-4;E9PBG3;Q9NQ86	TRI36_HUMAN	TRIM36	E3 ubiquitin-protein ligase TRIM36
23.4269	20.4801	Q8N5Y8;Q8N5Y8-3	H3BV75;Q8N5Y8-2;Q8N5Y8-3;Q8N5Y8	PAR16_HUMAN	PARP16	Protein mono-ADP-ribosyltransferase PARP16
23.4309	22.9212	A0A494C039	A0A494C039	A0A494C039_HUMAN	HYOU1	Isoform of Q9Y4L1, Hypoxia up-regulated 1
23.4374	24.1915	Q9UHK0	Q9UHK0	NUFP1_HUMAN	NUFIP1	FMR1-interacting protein NUFIP1
23.4387	22.8016	P43250-2	P43250-2;P43250-3;F8W9W2;P43250	GRK6_HUMAN	GRK6	Isoform of P43250, Isoform GRK6B of G protein-coupled receptor kinase 6
23.4439	24.9486	Q96ND0	K7EK00;K7ERQ2;Q96ND0	F210A_HUMAN	FAM210A	Protein FAM210A
23.4465	23.035	Q14596;Q14596-2	Q14596-2;Q14596	NBR1_HUMAN	NBR1	Next to BRCA1 gene 1 protein
23.4504	NaN	Q5U651	Q5U651	RAIN_HUMAN	RASIP1	Ras-interacting protein 1
23.451	23.7823	A0A8I5KPG1	A0A8I5KPG1	A0A8I5KPG1_HUMAN	SEC16A	Isoform of O15027, Protein transport protein sec16
23.451	21.7525	P31641	A0A087WY96;P31641	SC6A6_HUMAN	SLC6A6	Sodium- and chloride-dependent taurine transporter
23.4521	23.0138	Q9UQ84;Q9UQ84-4	Q9UQ84-4;Q9UQ84	EXO1_HUMAN	EXO1	Exonuclease 1
23.4523	25.4287	Q96H22;Q96H22-3	Q96H22-2;Q96H22-3;Q96H22-5;H3BMC7;Q96H22	CENPN_HUMAN	CENPN	Centromere protein N
23.4616	22.9913	Q5W0Z9;Q5W0Z9-2;Q5W0Z9-3;Q5W0Z9-4	B4DRN8;Q5W0Z9-2;Q5W0Z9-3;Q5W0Z9-4;Q5W0Z9	ZDH20_HUMAN	ZDHHC20	Palmitoyltransferase ZDHHC20
23.466	24.708	Q9NPL8	C9JU35;Q9NPL8	TIDC1_HUMAN	TIMMDC1	Complex I assembly factor TIMMDC1, mitochondrial
23.4711	20.1614	Q8N490;Q8N490-3;Q8N490-4	A0A8I5QKK6;Q8N490-3;Q8N490-4;A0A8J8ZTU4;A0A8I5KSD7;A0A8I5KV27;A0A8I5KVK5;A0A8I5KXZ5;A0A8I5KXK0;Q8N490	PNKD_HUMAN	PNKD	Probable hydrolase PNKD
23.474	23.7689	Q14315;Q14315-2	Q14315-2;Q14315	FLNC_HUMAN	FLNC	Filamin-C
23.4751	23.405	O60347	O60347	TBC12_HUMAN	TBC1D12	TBC1 domain family member 12
23.476	23.3909	Q99583	V9GY02;Q99583	MNT_HUMAN	MNT	Max-binding protein MNT
23.4773	24.4148	Q9NQG1	Q9NQG1	MANBL_HUMAN	MANBAL	Protein MANBAL
23.4782	22.8986	Q15291-2	Q15291-2	RBBP5_HUMAN	RBBP5	Isoform of Q15291, Isoform 2 of Retinoblastoma-binding protein 5
23.4821	24.9832	Q68DK7	J3KSZ8;J3QQY0;Q68DK7	MSL1_HUMAN	MSL1	Male-specific lethal 1 homolog
23.4838	25.2199	A0A0A0MRR3	A0A0A0MRR3	A0A0A0MRR3_HUMAN	TAF8	Isoform of Q7Z7C8, Transcription initiation factor TFIID subunit 8
23.4854	19.798	P42568;P42568-2	P42568-2;P42568	AF9_HUMAN	MLLT3	Protein AF-9
23.4893	22.4998	Q9BYT3	F8WAK5;B4DDH2;Q9BYT3-2;A0A0C4DH60;Q9BYT3	STK33_HUMAN	STK33	Serine/threonine-protein kinase 33
23.4898	22.516	Q9Y4D1;Q9Y4D1-2	Q9Y4D1-2;Q9Y4D1-3;Q9Y4D1	DAAM1_HUMAN	DAAM1	Disheveled-associated activator of morphogenesis 1
23.4954	20.9372	Q5MNZ9;Q5MNZ9-2	G5EA37;K7EK57;Q5MNZ9-2;Q5MNZ9	WIPI1_HUMAN	WIPI1	WD repeat domain phosphoinositide-interacting protein 1
23.5007	25.2922	Q9Y2H2	A0A3B3ISI3;A0A3B3ITL0;A0A3B3ITR9;A0A3B3IRJ9;Q9Y2H2	SAC2_HUMAN	INPP5F	Phosphatidylinositide phosphatase SAC2
23.5083	21.7648	P35625	P35625	TIMP3_HUMAN	TIMP3	Metalloproteinase inhibitor 3
23.5093	21.0454	A0A494BZY7;M0QZ67	A0A494BZY7;M0QZ67;H3BQF6	A0A494BZY7_HUMAN;M0QZ67_HUMAN	EEF1AKMT2	Isoform of Q5JPI9, EEF1A lysine methyltransferase 2
23.5174	26.8649	Q9BQB6	H0YD56;Q9BQB6	VKOR1_HUMAN	VKORC1	Vitamin K epoxide reductase complex subunit 1
23.5187	25.4057	Q5JTC6;Q5JTC6-2	Q5JTC6-2;Q5JTC6	AMER1_HUMAN	AMER1	APC membrane recruitment protein 1
23.5228	23.8399	Q8ND07	Q8ND07	BBOF1_HUMAN	BBOF1	Basal body-orientation factor 1
23.5243	21.4507	Q96NA2	Q96NA2	RILP_HUMAN	RILP	Rab-interacting lysosomal protein
23.5303	21.4355	O75581	F5H7J9;O75581	LRP6_HUMAN	LRP6	Low-density lipoprotein receptor-related protein 6
23.534	NaN	O00429-7	O00429-3;O00429-6;O00429-7;F8VUJ9;A0A8V8TQT5;A0A994J3G5;O00429	DNM1L_HUMAN	DNM1L	Isoform of O00429, Isoform 7 of Dynamin-1-like protein
23.5357	22.8359	P08779	C9JM50;K7EMS3;P08779;P08727	K1C16_HUMAN	KRT16	Keratin, type I cytoskeletal 16
23.5379	23.6363	Q9UNK9	Q9UNK9	ANGE1_HUMAN	ANGEL1	Protein angel homolog 1
23.5395	24.1529	Q9NWL6	C9IYZ1;U3KQP1;Q9NWL6	ASND1_HUMAN	ASNSD1	Asparagine synthetase domain-containing protein 1
23.5414	24.3485	Q5T2R2;Q5T2R2-3	Q5T2R2-2;Q5T2R2-3;Q5T2R2	DPS1_HUMAN	PDSS1	All trans-polyprenyl-diphosphate synthase PDSS1
23.542	19.6825	Q9Y259	Q9Y259	CHKB_HUMAN	CHKB	Choline/ethanolamine kinase
23.5474	18.5799	Q99959;Q99959-2	Q99959-2;A0A8V8TQD7;A0A087WXY2;Q99959	PKP2_HUMAN	PKP2	Plakophilin-2
23.5545	19.394	Q9HCE3	Q9HCE3	ZN532_HUMAN	ZNF532	Zinc finger protein 532
23.5574	23.4086	Q9H0V1;Q9H0V1-2	H7C268;Q9H0V1-2;Q9H0V1	TM168_HUMAN	TMEM168	Transmembrane protein 168
23.559	NaN	Q5U623	H3BPC9;Q5U623-2;F5GY73;Q5U623	MCAF2_HUMAN	ATF7IP2	Activating transcription factor 7-interacting protein 2
23.5598	20.4559	Q12923;Q12923-2;Q12923-3;Q12923-4	Q12923-2;Q12923-3;Q12923-4;Q12923	PTN13_HUMAN	PTPN13	Tyrosine-protein phosphatase non-receptor type 13
23.5661	22.3661	Q96AJ1	J3KNW5;I3L487;I3L3S9;Q96AJ1	CLUA1_HUMAN	CLUAP1	Clusterin-associated protein 1
23.5719	24.7301	Q9H6Y7;Q9H6Y7-2	Q9H6Y7-2;I3L2Y3;Q9H6Y7	RN167_HUMAN	RNF167	E3 ubiquitin-protein ligase RNF167
23.5748	23.5484	P12111;P12111-2	C9JNG9;P12111-2;P12111-5;P12111	CO6A3_HUMAN	COL6A3	Collagen alpha-3(VI) chain
23.5748	15.3698	P38398;P38398-4;P38398-7;P38398-8	A0A2R8Y7V5;E7EUM2;B7ZA85;P38398-3;P38398-4;P38398-5;P38398-6;P38398-7;P38398-8;H0Y8B8;H0Y850;A0A8V8TPY7;P38398	BRCA1_HUMAN	BRCA1	Breast cancer type 1 susceptibility protein
23.5802	24.1429	Q8IVW6;Q8IVW6-4	Q8IVW6-3;Q8IVW6-4;Q8IVW6	ARI3B_HUMAN	ARID3B	AT-rich interactive domain-containing protein 3B
23.5804	23.1743	O15169;O15169-2	O15169-2;O15169	AXIN1_HUMAN	AXIN1	Axin-1
23.5814	24.2486	O60237;O60237-6	O60237-6;A0A994J7P4;O60237	MYPT2_HUMAN	PPP1R12B	Protein phosphatase 1 regulatory subunit 12B
23.5818	25.3027	Q9HBU6	H0YH69;A0A5K1VW28;Q9HBU6	EKI1_HUMAN	ETNK1	Ethanolamine kinase 1
23.5829	24.8365	Q8TD26	Q8TD26-2;Q8TD26-3;Q8TD26	CHD6_HUMAN	CHD6	Chromodomain-helicase-DNA-binding protein 6
23.5865	19.8785	Q9H4G4	Q5VZR0;Q9H4G4	GAPR1_HUMAN	GLIPR2	Golgi-associated plant pathogenesis-related protein 1
23.5887	28.3443	O15417;O15417-2	O15417-2;H9KVB4;O15417	TNC18_HUMAN	TNRC18	Trinucleotide repeat-containing gene 18 protein
23.5903	23.4596	Q96JN0	A0A6Q8PFM9;A0A6Q8PG83;A0A6Q8PGL8;A0A6Q8PGR8;Q96JN0	LCOR_HUMAN	LCOR	Ligand-dependent corepressor
23.5913	21.6842	Q6P1Q0;Q6P1Q0-2;Q6P1Q0-4;Q6P1Q0-7	H0YIV5;F8VZA2;F8VVQ3;F8VP71;Q6P1Q0-2;Q6P1Q0-4;Q6P1Q0-7;Q6P1Q0	LTMD1_HUMAN	LETMD1	LETM1 domain-containing protein 1
23.5936	24.3639	P16422	B5MCA4;P16422	EPCAM_HUMAN	EPCAM	Epithelial cell adhesion molecule
23.5949	NaN	A0A1W2PQ37;A0A1W2PQH3	A0A1W2PQ37;A0A1W2PQH3	A0A1W2PQ37_HUMAN;A0A1W2PQH3_HUMAN	ME2	Isoform of P23368, Malic enzyme
23.5968	22.7839	Q8IVL0;Q8IVL0-2;Q8IVL0-3	A0A2R8YFX5;H0YHA8;Q8IVL0-2;Q8IVL0-3;Q8IVL0	NAV3_HUMAN	NAV3	Neuron navigator 3
23.5978	22.8079	O95255;O95255-3	O95255-3;A0A0J9YVW5;A0A0G2JMG3;A0A8C8Q0G8;O95255	MRP6_HUMAN	ABCC6	ATP-binding cassette sub-family C member 6
23.598	26.0643	Q92560	F8W6N3;H0Y8E8;Q92560	BAP1_HUMAN	BAP1	Ubiquitin carboxyl-terminal hydrolase BAP1
23.6015	22.3728	Q9H777	Q9H777	RNZ1_HUMAN	ELAC1	Zinc phosphodiesterase ELAC protein 1
23.613	23.6682	Q9UGP5	Q5JQP2;Q5JQP3;Q5JQP4;Q5JQP8;Q9HBN3;Q9UGP5-2;Q9UGP5	DPOLL_HUMAN	POLL	DNA polymerase lambda
23.6145	23.7979	Q9Y3Q3	Q9Y3Q3	TMED3_HUMAN	TMED3	Transmembrane emp24 domain-containing protein 3
23.6164	23.7627	P58012	P58012	FOXL2_HUMAN	FOXL2	Forkhead box protein L2
23.6164	24.7154	Q9H840	Q9H840	GEMI7_HUMAN	GEMIN7	Gem-associated protein 7
23.6172	23.3853	Q8NFJ5	Q8NFJ5	RAI3_HUMAN	GPRC5A	Retinoic acid-induced protein 3
23.618	NaN	Q2TAK8	Q2TAK8-2;Q2TAK8-3;J3KNX4;A0A0D9SGJ8;Q2TAK8	PWP3A_HUMAN	PWWP3A	PWWP domain-containing DNA repair factor 3A
23.6193	24.1752	P78317	P78317	RNF4_HUMAN	RNF4	E3 ubiquitin-protein ligase RNF4
23.6197	24.5165	Q9NVH0	A0A8I5KSH7;Q9NVH0	EXD2_HUMAN	EXD2	Exonuclease 3'-5' domain-containing protein 2
23.6251	26.6593	Q8TF71	H0Y5M8;H0Y3W8;Q8TF71	MOT10_HUMAN	SLC16A10	Monocarboxylate transporter 10
23.6262	22.5487	Q86UT8	Q86UT8	CATAC_HUMAN	CENATAC	Centrosomal AT-AC splicing factor
23.6314	25.1312	Q6IQ55	H3BTY5;Q6IQ55-3;Q5TCY1-2;A0A0B4J292;A0A994J709;Q6IQ55;Q5TCY1	TTBK2_HUMAN	TTBK2	Tau-tubulin kinase 2
23.6347	23.8455	Q9P2D6;Q9P2D6-2	Q9P2D6-2;Q9P2D6-3;D6RCC7;Q9P2D6	F135A_HUMAN	FAM135A	Protein FAM135A
23.6375	21.8988	P35443	E7ES19;Q2HIZ1;P49746-2;F5H4Z8;P49746;P35443	TSP4_HUMAN	THBS4	Thrombospondin-4
23.6376	23.4223	Q9NRW4;Q9NRW4-2	Q9NRW4-2;S4R3M1;Q9NRW4	DUS22_HUMAN	DUSP22	Dual specificity protein phosphatase 22
23.6399	24.4758	Q13936;Q13936-10;Q13936-11;Q13936-12;Q13936-13;Q13936-14;Q13936-15;Q13936-16;Q13936-17;Q13936-18;Q13936-19;Q13936-2;Q13936-20;Q13936-21;Q13936-22;Q13936-23;Q13936-24;Q13936-25;Q13936-26;Q13936-27;Q13936-28;Q13936-29;Q13936-3;Q13936-30;Q13936-31;Q13936-32;Q13936-33;Q13936-34;Q13936-35;Q13936-36;Q13936-37;Q13936-4;Q13936-5;Q13936-6;Q13936-7;Q13936-8;Q13936-9	Q13936-10;Q13936-11;Q13936-12;Q13936-13;Q13936-14;Q13936-15;Q13936-16;Q13936-17;Q13936-18;Q13936-19;Q13936-20;Q13936-21;Q13936-22;Q13936-23;Q13936-24;Q13936-25;Q13936-26;Q13936-27;Q13936-28;Q13936-29;Q13936-30;Q13936-31;Q13936-32;Q13936-33;Q13936-34;Q13936-35;Q13936-36;Q13936-37;Q13936-2;Q13936-3;Q13936-4;Q13936-5;Q13936-6;Q13936-7;Q13936-8;Q13936-9;A0A804HI37;A0A804HIR0;A0A804HIZ0;A0A804HIJ8;A0A…	CAC1C_HUMAN	CACNA1C	Voltage-dependent L-type calcium channel subunit alpha-1C
23.6527	23.6377	Q9NUX5;Q9NUX5-2	Q9NUX5-2;B7Z7M5;Q5MJ34;Q5MJ35;A0A590UJP0;A0A590UJF2;A0A590UJF7;Q9NUX5	POTE1_HUMAN	POT1	Protection of telomeres protein 1
23.6624	NaN	Q9UM47	M0R3C9;Q9UM47	NOTC3_HUMAN	NOTCH3	Neurogenic locus notch homolog protein 3
23.6635	24.0449	Q96DT6	H7BZW5;Q96DT6	ATG4C_HUMAN	ATG4C	Cysteine protease ATG4C
23.6684	20.9737	Q9NVH6;Q9NVH6-5;Q9NVH6-7;Q9NVH6-8	Q9NVH6-8;Q9NVH6-2;Q9NVH6-3;Q9NVH6-4;Q9NVH6-5;Q9NVH6-7;Q9NVH6	TMLH_HUMAN	TMLHE	Trimethyllysine dioxygenase, mitochondrial
23.6716	24.3739	Q8NF64;Q8NF64-2;Q8NF64-3	E7EWM3;Q8NF64-3;Q8NF64-2;Q8NF64	ZMIZ2_HUMAN	ZMIZ2	Zinc finger MIZ domain-containing protein 2
23.6779	23.3598	Q9H0P0	X6RM59;Q9H0P0	5NT3A_HUMAN	NT5C3A	Cytosolic 5'-nucleotidase 3A
23.6779	23.9438	Q9BVT8	C9JCW7;C9JE12;A0A590UJA9;Q9BVT8	TMUB1_HUMAN	TMUB1	Transmembrane and ubiquitin-like domain-containing protein 1
23.6794	25.7814	Q8NDD1;Q8NDD1-5;Q8NDD1-6	Q5TBI2;Q8NDD1-5;Q8NDD1-6;Q8NDD1	CA131_HUMAN	C1orf131	Uncharacterized protein C1orf131
23.6796	NaN	Q9UG01	A0A6Q8PGJ2;H7C252;H7C186;Q9UG01-2;Q9UG01	IF172_HUMAN	IFT172	Intraflagellar transport protein 172 homolog
23.6855	26.654	O95210	O95210	STBD1_HUMAN	STBD1	Starch-binding domain-containing protein 1
23.6855	24.1792	Q9NRR3	D6REL0;Q9NRR3	C42S2_HUMAN	CDC42SE2	CDC42 small effector protein 2
23.6877	27.9619	O75197	E9PHY1;O75197	LRP5_HUMAN	LRP5	Low-density lipoprotein receptor-related protein 5
23.6905	21.9453	A0A8V8TMQ1;A0A8V8TNP6	A0A8V8TNP6;A0A8V8TMQ1	A0A8V8TMQ1_HUMAN;A0A8V8TNP6_HUMAN	FXR1	Isoform of P51114, RNA-binding protein FXR1
23.6922	24.4758	Q9Y5K5	H0Y6Y4;H0Y4E0;Q5LJA9;Q9Y5K5	UCHL5_HUMAN	UCHL5	Ubiquitin carboxyl-terminal hydrolase isozyme L5
23.6941	20.6829	A0A8V8TMR6	A0A8V8TMR6	A0A8V8TMR6_HUMAN	SBDS	Isoform of Q9Y3A5, SBDS ribosome maturation factor
23.6952	24.7242	Q9BRA0;Q9BRA0-2	Q9BRA0-2;A0A0B4J297;I3L4V0;I3L3Z2;I3L310;Q9BRA0	LSMD1_HUMAN	NAA38	N-alpha-acetyltransferase 38, NatC auxiliary subunit
23.6958	24.6503	P55055;P55055-2	P55055-2;P55055	NR1H2_HUMAN	NR1H2	Oxysterols receptor LXR-beta
23.6986	20.3267	P30838	A8MYB8;C9JKT2;C9JMC5;E9PNN6;I3L4E5;I3L3I9;I3L1H6;P30838	AL3A1_HUMAN	ALDH3A1	Aldehyde dehydrogenase, dimeric NADP-preferring
23.7003	23.677	O60830	O60830	TI17B_HUMAN	TIMM17B	Mitochondrial import inner membrane translocase subunit Tim17-B
23.7075	24.4386	Q969V6	B0QY83;A0A494BZX7;A0A499FIJ6;W0Z7M9;A0A087X287;A0A087WU73;Q969V6	MRTFA_HUMAN	MRTFA	Myocardin-related transcription factor A
23.7093	NaN	Q2KHT3-2	A0A8V8TR67;Q2KHT3-2	CL16A_HUMAN	CLEC16A	Isoform of Q2KHT3, Isoform 2 of Protein CLEC16A
23.71	23.6912	Q7KYR7;Q7KYR7-1;Q7KYR7-5	C9IY66;C9JNC3;C9JAJ6;H7BYC3;Q7KYR7-4;Q7KYR7-5;Q7KYR7-6;Q7KYR7-1;Q8WVV5-2;Q8WVV5-3;Q7KYR7;Q8WVV5	BT2A1_HUMAN	BTN2A1	Butyrophilin subfamily 2 member A1
23.7106	24.4276	O94941;O94941-2	O94941-2;O94941	RNF37_HUMAN	UBOX5	RING finger protein 37
23.7215	23.2191	O75319	O75319-2;H7C0E6;A0A8Q3WM77;A0A8Q3SIC9;A0A8Q3SIF8;A0A8Q3SIE6;A0A8Q3SIB0;A0A8Q3SI82;A0A8Q3SI85;O75319	DUS11_HUMAN	DUSP11	RNA/RNP complex-1-interacting phosphatase
23.7342	23.1821	Q9NXC2;Q9NXC2-2	Q9NXC2-2;Q9NXC2	GFOD1_HUMAN	GFOD1	Glucose-fructose oxidoreductase domain-containing protein 1
23.7355	26.0285	Q9NZT1	Q9NZT1	CALL5_HUMAN	CALML5	Calmodulin-like protein 5
23.736	21.8945	Q9UL54-3	Q9UL54-3;Q9UL54	TAOK2_HUMAN	TAOK2	Isoform of Q9UL54, Isoform 3 of Serine/threonine-protein kinase TAO2
23.7364	28.2766	P78386	P78386	KRT85_HUMAN	KRT85	Keratin, type II cuticular Hb5
23.7378	20.8457	Q9Y4X4;Q9Y4X4-3	Q9Y4X4-3;Q9Y4X4	KLF12_HUMAN	KLF12	Krueppel-like factor 12
23.7461	23.5806	Q8IYW5	Q8IYW5	RN168_HUMAN	RNF168	E3 ubiquitin-protein ligase RNF168
23.7565	24.6093	Q8IWB7	C9JJ54;A0A494C0A6;Q8IWB7	WDFY1_HUMAN	WDFY1	WD repeat and FYVE domain-containing protein 1
23.7566	25.3741	O14717	O14717-2;A0A0B4J214;O14717	TRDMT_HUMAN	TRDMT1	tRNA (cytosine(38)-C(5))-methyltransferase
23.7616	NaN	U3KQK2	U3KQK2	U3KQK2_HUMAN	TPM2	Isoform of P07951, Tropomyosin 2 (Fragment)
23.7642	23.7679	Q96B49	Q96B49	TOM6_HUMAN	TOMM6	Mitochondrial import receptor subunit TOM6 homolog
23.7646	21.2231	Q9Y2Q0;Q9Y2Q0-2;Q9Y2Q0-3	Q9Y2Q0-2;Q9Y2Q0-3;Q9Y2Q0	AT8A1_HUMAN	ATP8A1	Phospholipid-transporting ATPase IA
23.7665	23.747	Q9Y5W7;Q9Y5W7-2;Q9Y5W7-3;Q9Y5W7-4	D6RJG9;Q9Y5W7-2;Q9Y5W7-3;Q9Y5W7-4;D6RBA7;D6RDH9;H0Y926;A0A804HI30;A0A804HI47;A0A804HI51;A0A804HIR3;A0A804HIZ9;A0A804HIX9;A0A804HJ91;A0A804HJ61;A0A804HIA1;A0A804HIC6;A0A804HIK6;A0A804HID8;A0A804HJS3;A0A804HJT4;A0A804HK22;A0A804HK55;A0A804HJW4;A0A804HJZ4;A0A804HJC6;A0A804HJL8;A0A804HJI4;A0A804HJK3;A0A804HJG1;A0A804HL44;A0A804HKZ1;A0A804HKA3;A0A804HKC6;A0A804HKN0;A0A804HKH6;A0A804HKJ3;Q9Y5W7	SNX14_HUMAN	SNX14	Sorting nexin-14
23.7669	23.3128	P09493-10	A0A0S2Z4G6;H0YKJ4;A0A494C0I0;P09493-10	TPM1_HUMAN	TPM1	Isoform of P09493, Isoform 10 of Tropomyosin alpha-1 chain
23.7677	24.522	Q07866-8	H0YJL0;H0YJU9;F8W6L3;G5E9S8;Q07866-8	KLC1_HUMAN	KLC1	Isoform of Q07866, Isoform S of Kinesin light chain 1
23.7701	21.6841	Q86YZ3	Q86YZ3	HORN_HUMAN	HRNR	Hornerin
23.7744	22.0769	Q8WZ74	F8WB16;H0Y448;Q8WZ74	CTTB2_HUMAN	CTTNBP2	Cortactin-binding protein 2
23.7774	23.1605	Q9P273	Q9P273	TEN3_HUMAN	TENM3	Teneurin-3
23.788	25.2944	Q9Y3A2	Q9Y3A2-2;Q9Y3A2	UTP11_HUMAN	UTP11	Probable U3 small nucleolar RNA-associated protein 11
23.7907	22.8476	Q2YD98	A0A7I2V3L2;A0A7I2V4K1;A0A7I2V554;Q2YD98	UVSSA_HUMAN	UVSSA	UV-stimulated scaffold protein A
23.7912	23.3724	P49768;P49768-2	P49768-2;P49768-3;P49768-4;P49768-5;P49768-6;P49768-7;H0YM52;G3V3Z0;G3V4M0;G3V4P4;G3V519;G3V2B1;G3V2G7;A0A8V8TQT3;A0A8V8TQU7;A0A8V8TR50;A0A8V8TR52;A0A8V8TR55;A0A8V8TQV2;A0A8V8TPK5;A0A8V8TPL5;A0A8V8TQ36;A0A8V8TQ53;A0A8V8TQ54;A0A8V8TQ90;A0A8V8TQ93;A0A8V8TLT5;P49768	PSN1_HUMAN	PSEN1	Presenilin-1
23.7913	24.7165	Q9H9Y4	Q5JYG3;Q9H9Y4	GPN2_HUMAN	GPN2	GPN-loop GTPase 2
23.7976	22.818	Q7Z5Q1-5;Q7Z5Q1-6	Q7Z5Q1-3;Q7Z5Q1-4;Q7Z5Q1-5;Q7Z5Q1-6;Q7Z5Q1-7;Q7Z5Q1-8;Q7Z5Q1-9;Q8NE35-2;H0Y9D9;A0A5K1VW93;A0A5K1VW61;A0A5K1VW71;A0A5K1VW79;Q7Z5Q1;Q8NE35	CPEB2_HUMAN	CPEB2	Isoform of Q7Z5Q1, Isoform 4 of Cytoplasmic polyadenylation element-binding protein 2
23.7986	21.4151	Q13432	Q13432-2;C9JSK0;J3QQT8;Q13432	U119A_HUMAN	UNC119	Protein unc-119 homolog A
23.8014	23.4957	H0Y8U5	H0Y8U5	H0Y8U5_HUMAN	CTBP1	Isoform of Q13363, C-terminal binding protein 1
23.8034	23.7667	Q02535	Q02535	ID3_HUMAN	ID3	DNA-binding protein inhibitor ID-3
23.8037	21.4198	P00742	P00742	FA10_HUMAN	F10	Coagulation factor X
23.8083	24.1674	Q9Y5W8;Q9Y5W8-2	Q9Y5W8-2;A0A087WUZ7;Q9Y5W8	SNX13_HUMAN	SNX13	Sorting nexin-13
23.8086	23.8946	Q9NSV4-6	Q9NSV4-6	DIAP3_HUMAN	DIAPH3	Isoform of Q9NSV4, Isoform 6 of Protein diaphanous homolog 3
23.8113	24.6807	Q96BX8	Q96BX8	MOB3A_HUMAN	MOB3A	MOB kinase activator 3A
23.814	23.675	Q8WUH2	Q8WUH2	TGFA1_HUMAN	TGFBRAP1	Transforming growth factor-beta receptor-associated protein 1
23.8198	25.0058	Q6IQ23;Q6IQ23-2	H0YDE2;A0A1B0GTN9;Q6IQ23-2;Q6IQ23-3;E9PKC0;A0A8V8TMS3;A0A8Q3WLI9;Q6IQ23	PKHA7_HUMAN	PLEKHA7	Pleckstrin homology domain-containing family A member 7
23.8208	24.5587	Q15699	Q15699	ALX1_HUMAN	ALX1	ALX homeobox protein 1
23.8225	21.8463	Q9Y3D5	H0YAG5;D6RCM2;Q9Y3D5	RT18C_HUMAN	MRPS18C	Small ribosomal subunit protein bS18m
23.8336	25.7004	O15182	E5RJF8;E5RK82;O15182	CETN3_HUMAN	CETN3	Centrin-3
23.834	24.4812	Q9P227	Q9P227	RHG23_HUMAN	ARHGAP23	Rho GTPase-activating protein 23
23.8387	24.5808	Q8N5C8;Q8N5C8-2	Q8N5C8-2;F6SS63;Q8N5C8	TAB3_HUMAN	TAB3	TGF-beta-activated kinase 1 and MAP3K7-binding protein 3
23.8395	19.63	O43829	O43829	ZBT14_HUMAN	ZBTB14	Zinc finger and BTB domain-containing protein 14
23.8425	21.97	Q9HC44	Q9HC44	GPBL1_HUMAN	GPBP1L1	Vasculin-like protein 1
23.845	24.938	Q96IW7	C9J463;F8WAU7;C9JZ27;C9JNZ0;C9JRY4;C9JR77;C9JDJ8;Q96IW7	SC22A_HUMAN	SEC22A	Vesicle-trafficking protein SEC22a
23.847	24.0274	Q6ZU65	H7C4P8;Q6ZU65-2;Q6ZU65	UBN2_HUMAN	UBN2	Ubinuclein-2
23.8501	24.5771	P15941;P15941-11;P15941-17;P15941-2;P15941-3;P15941-4;P15941-7;P15941-8	P15941-11;P15941-13;P15941-17;A0A0C4DGW3;A0A0A0MSH4;P15941-2;P15941-3;P15941-4;P15941-7;P15941-8;A0A0A0MRB3;B1AVQ7;A0A087X061;Q7Z536;A0A087WVJ0;A0A087WZZ6;P15941	MUC1_HUMAN	MUC1	Mucin-1
23.8519	23.414	Q8NFP9	A0A8I5QKR1;A0A8I5QKR6;Q5T321;A0A8I5KTY1;A0A8I5KSX3;A0A8I5KZ13;Q8NFP9	NBEA_HUMAN	NBEA	Neurobeachin
23.8529	24.6059	P08123	P08123	CO1A2_HUMAN	COL1A2	Collagen alpha-2(I) chain
23.8558	25.3981	Q6SJ93	Q6SJ93-2;Q6SJ93	F111B_HUMAN	FAM111B	Serine protease FAM111B
23.8562	23.3959	A0A8V8TNZ5	A0A8V8TNZ5	A0A8V8TNZ5_HUMAN	ARF1	Isoform of P84077, ADP-ribosylation factor (Fragment)
23.8574	NaN	P50053-2	P50053-2	KHK_HUMAN	KHK	Isoform of P50053, Isoform A of Ketohexokinase
23.8582	24.9214	Q8N4S0;Q8N4S0-2	A0A2R8Y7C3;A0A2R8Y4L3;A0A2R8YE98;A0A7P0T8E7;A0A7P0T881;A0A7P0TAG3;Q8N4S0-2;F5H777;Q8N4S0	CCD82_HUMAN	CCDC82	Coiled-coil domain-containing protein 82
23.8683	24.0346	Q9H079	H0YMR8;H0YLX9;Q9H079	KTBL1_HUMAN	KATNBL1	KATNB1-like protein 1
23.8684	25.393	Q12948	M0R279;P55316;Q12948;Q99958;Q12952	FOXC1_HUMAN	FOXC1	Forkhead box protein C1
23.8695	21.6513	O60307	A0A8V8TMW0;A0A8V8TMM3;A0A8V8TLL8;A0A8I5KST9;A0A994J700;O60307	MAST3_HUMAN	MAST3	Microtubule-associated serine/threonine-protein kinase 3
23.8709	22.5617	P28289	P28289-2;P28289	TMOD1_HUMAN	TMOD1	Tropomodulin-1
23.873	22.061	Q7Z3V4	Q7Z3V4-2;Q7Z3V4-3;F5H6D6;F5H5T5;Q7Z3V4	UBE3B_HUMAN	UBE3B	Ubiquitin-protein ligase E3B
23.8783	22.359	Q9P0M2	A0A804HI88;F5GXD1;Q9P0M2	AKA7G_HUMAN	AKAP7	A-kinase anchor protein 7 isoform gamma
23.8866	24.6515	P37287;P37287-3	A0A0U1RQM9;P37287-2;P37287-3;B3KUV7;P37287	PIGA_HUMAN	PIGA	Phosphatidylinositol N-acetylglucosaminyltransferase subunit A
23.8869	19.4395	Q92794	A0A3F2YNX6;A5PLL3;A0A3B3IS53;A0A3B3ITI3;Q92794	KAT6A_HUMAN	KAT6A	Histone acetyltransferase KAT6A
23.8911	22.6259	P11532-9	P11532-14;P11532-15;P11532-16;A0A5H1ZRP9;A0A5H1ZRQ8;H0Y304;A0A804HKY9;P11532-5;P11532-6;P11532-9;A0A7P0Z4P7;A0A7P0Z4Q6;A0A087WTU7	DMD_HUMAN	DMD	Isoform of P11532, Isoform 16 of Dystrophin
23.893	27.5677	Q92664	Q92664-2;A0A1X7SBT5;H7BZH7;Q92664	TF3A_HUMAN	GTF3A	Transcription factor IIIA
23.8952	25.0147	Q9NUS5	Q9NUS5	AP5S1_HUMAN	AP5S1	AP-5 complex subunit sigma-1
23.8992	20.2698	O95425-2;O95425-4	O95425-2;O95425-3;O95425-4;A0A6I8PIX7;O95425	SVIL_HUMAN	SVIL	Isoform of O95425, Isoform 2 of Supervillin
23.9015	22.7256	Q96J92-2	Q96J92-2	WNK4_HUMAN	WNK4	Isoform of Q96J92, Isoform 2 of Serine/threonine-protein kinase WNK4
23.9035	23.0848	Q86UX7;Q86UX7-2	Q86UX7-2;A0A8V8TP41;A0A8V8TMU1;A0A8V8TNT4;A0A8V8TMD7;A0A8V8TME2;F5H3I6;Q86UX7	URP2_HUMAN	FERMT3	Fermitin family homolog 3
23.9074	26.0331	Q7L099-3;Q7L099-4	D6REM9;D6RCQ1;Q7L099-2;Q7L099-3;Q7L099-4;Q7L099	RUFY3_HUMAN	RUFY3	Isoform of Q7L099, Isoform 3 of Protein RUFY3
23.91	NaN	I3L0M9	I3L0M9	I3L0M9_HUMAN	ELOB	Isoform of Q15370, Elongin B (Fragment)
23.9165	21.5481	P53539;P53539-10;P53539-11;P53539-3;P53539-4;P53539-7	P53539-10;P53539-11;P53539-3;P53539-4;P53539-7;K7ERZ8;P53539	FOSB_HUMAN	FOSB	Protein FosB
23.9169	26.473	Q8IY21	A0A7P0T8Y0;A0A7P0TAZ7;Q8IY21	DDX60_HUMAN	DDX60	Probable ATP-dependent RNA helicase DDX60
23.9197	27.4126	Q9UHW9;Q9UHW9-2;Q9UHW9-3;Q9UHW9-4;Q9UHW9-5;Q9UHW9-6	A0A6Q8PH21;H0YMQ9;H0YKQ8;H0YKE6;Q9UHW9-2;Q9UHW9-3;Q9UHW9-4;Q9UHW9-5;Q9UHW9-6;Q9UHW9	S12A6_HUMAN	SLC12A6	Solute carrier family 12 member 6
23.9246	21.8142	P49747;P49747-2	P49747-2;G3XAP6;P49747	COMP_HUMAN	COMP	Cartilage oligomeric matrix protein
23.9296	21.9956	Q96DU7	A0A8V8TPP3;Q96DU7	IP3KC_HUMAN	ITPKC	Inositol-trisphosphate 3-kinase C
23.935	24.845	Q8WVQ1;Q8WVQ1-3	Q8WVQ1-2;Q8WVQ1-3;K7EN15;Q8WVQ1	CANT1_HUMAN	CANT1	Soluble calcium-activated nucleotidase 1
23.9409	25.7353	Q06787-2	A8MQB8;G3V0J0;Q06787-2;Q06787-4;Q06787-6;Q06787-7;A0A8I5KUC2;A0A8I5KT56;A0A8I5KWH0;A0A8I5KZ21	FMR1_HUMAN	FMR1	Isoform of Q06787, Isoform 1 of Fragile X messenger ribonucleoprotein 1
23.9461	22.975	Q8NHM5;Q8NHM5-2;Q8NHM5-3;Q8NHM5-4	Q8NHM5-2;Q8NHM5-3;Q8NHM5-4;Q8NHM5-5;F8WBN2;S4R3G4;F5GXC2;Q8NHM5	KDM2B_HUMAN	KDM2B	Lysine-specific demethylase 2B
23.9475	22.0265	H0Y8X4	H0Y8X4	H0Y8X4_HUMAN	DNPH1	Isoform of O43598, 2'-deoxynucleoside 5'-phosphate N-hydrolase 1 (Fragment)
23.9479	20.3659	Q86X95	Q86X95	CIR1_HUMAN	CIR1	Corepressor interacting with RBPJ 1
23.9537	22.0892	Q92567;Q92567-2	Q92567-2;Q92567	F168A_HUMAN	FAM168A	Protein FAM168A
23.9581	NaN	Q2M2Z5;Q2M2Z5-2;Q2M2Z5-3;Q2M2Z5-4;Q2M2Z5-5	Q2M2Z5-2;Q2M2Z5-3;Q2M2Z5-4;Q2M2Z5-5;A0A087X032;A0A087X0T6;A0A087X251;A0A087WTH3;A0A087WX12;Q2M2Z5	KIZ_HUMAN	KIZ	Centrosomal protein kizuna
23.9594	25.8829	Q969P6	Q969P6-2;E5RIC7;Q969P6	TOP1M_HUMAN	TOP1MT	DNA topoisomerase I, mitochondrial
23.9596	NaN	Q9UHC1;Q9UHC1-2	Q9UHC1-2;H0YJB4;G3V419;Q9UHC1	MLH3_HUMAN	MLH3	DNA mismatch repair protein Mlh3
23.9612	19.9433	Q7L266	E9PJK6;A0A087WUG3;Q7L266	ASGL1_HUMAN	ASRGL1	Isoaspartyl peptidase/L-asparaginase
23.9637	22.936	O15287	C9JSE3;A0A8Q3WMK6;A0A8Q3WLH9;A0A8Q3SJ04;O15287	FANCG_HUMAN	FANCG	Fanconi anemia group G protein
23.9659	22.6787	Q96B02;Q96B02-2;Q96B02-3	Q96B02-2;Q96B02-3;H0YB73;X6REH9;E5RG25;H3BMM0;Q96B02	UBE2W_HUMAN	UBE2W	Ubiquitin-conjugating enzyme E2 W
23.9668	21.4683	Q8WWN8	Q8WWN8-2;G5E9Y3;Q8WWN8	ARAP3_HUMAN	ARAP3	Arf-GAP with Rho-GAP domain, ANK repeat and PH domain-containing protein 3
23.973	23.4458	E9PLG2	E9PLG2	E9PLG2_HUMAN	PSMC3	Isoform of P17980, Proteasome 26S subunit, ATPase 3 (Fragment)
23.9828	NaN	Q63HQ0	Q63HQ0	AP1AR_HUMAN	AP1AR	AP-1 complex-associated regulatory protein
23.9877	25.1056	Q86UW9;Q86UW9-2	E7ET89;Q86UW9-2;C9JII1;C9JEH4;Q86UW9	DTX2_HUMAN	DTX2	Probable E3 ubiquitin-protein ligase DTX2
23.9897	24.535	A0A499FI48;C9JMN9	C9JMN9;A0A499FI48	A0A499FI48_HUMAN;C9JMN9_HUMAN	PDIA4	Isoform of P13667, Protein disulfide-isomerase
23.991	21.1956	O75771	K7EKG7;O75771-2;O75771-3;O75771-4;O75771-5;O75771-6;O75771-7;O75771-8;O75771	RA51D_HUMAN	RAD51D	DNA repair protein RAD51 homolog 4
23.9916	22.79	Q5XG87	Q5XG87-2;A0A9H4DBI9;Q5XG87	PAPD7_HUMAN	TENT4A	Terminal nucleotidyltransferase 4A
24.0028	23.2666	O95260	A0A8I5KNV5;A0A8I5KSC8;A0A8I5KTH0;A0A8I5KWA6;A0A8I5KZ10;A0A8I5KZ28;A0A8I5KXF6;O95260	ATE1_HUMAN	ATE1	Arginyl-tRNA--protein transferase 1
24.0031	22.8354	Q15517	Q2L6G8;G8JLG2;Q15517	CDSN_HUMAN	CDSN	Corneodesmosin
24.0031	24.1517	O43639	E7EPF5;E9PEE2;O43639	NCK2_HUMAN	NCK2	Cytoplasmic protein NCK2
24.0042	23.0926	P24863;P24863-2	J3KP90;P24863-2;H0YBQ5;Q5JV82;G5E954;E5RIH8;E5RFX8;E5RI39;E5RFK5;P24863	CCNC_HUMAN	CCNC	Cyclin-C
24.0064	21.0486	O94953	O94953-2;K7ES23;F5GX28;A0A0C4DFL8;O94953	KDM4B_HUMAN	KDM4B	Lysine-specific demethylase 4B
24.0148	20.2768	Q14642	Q5T1B5;Q14642	I5P1_HUMAN	INPP5A	Inositol polyphosphate-5-phosphatase A
24.0157	24.3171	Q7Z5U6	C9JJZ8;C9JBE7;Q7Z5U6	WDR53_HUMAN	WDR53	WD repeat-containing protein 53
24.0169	20.2752	A7KAX9;A7KAX9-2	G3V174;A7KAX9-2;A7KAX9-3;A0A804HK06;A7KAX9	RHG32_HUMAN	ARHGAP32	Rho GTPase-activating protein 32
24.0199	21.8913	Q86V87	Q86V87	FHI2B_HUMAN	FHIP2B	FHF complex subunit HOOK-interacting protein 2B
24.0214	23.1039	O75147-1	A6NN50;O75147-1;O75147-2;O75147-4;O75147	OBSL1_HUMAN	OBSL1	Isoform of O75147, Isoform 3 of Obscurin-like protein 1
24.0255	25.0217	Q96PK6-5	Q96PK6-5;Q9BWF3	RBM14_HUMAN	RBM14	Isoform of Q96PK6, Isoform 5 of RNA-binding protein 14
24.0271	22.9171	A2RTX5-2	A2RTX5-2;A2RTX5	SYTC2_HUMAN	TARS3	Isoform of A2RTX5, Isoform 2 of Threonine--tRNA ligase 2, cytoplasmic
24.0285	22.5039	O75925;O75925-2	H3BSI8;O75925-2;O75925-3;O75925	PIAS1_HUMAN	PIAS1	E3 SUMO-protein ligase PIAS1
24.0295	23.0878	Q8N1F8	H7C2J7;Q8N1F8	S11IP_HUMAN	STK11IP	Serine/threonine-protein kinase 11-interacting protein
24.0326	22.4669	O00472	A0A0U1RR08;D6RC27;O00472-2;O00472	ELL2_HUMAN	ELL2	RNA polymerase II elongation factor ELL2
24.0336	25.5891	P17568	P17568	NDUB7_HUMAN	NDUFB7	NADH dehydrogenase [ubiquinone] 1 beta subcomplex subunit 7
24.0341	24.1051	A0A8I5KX85	A0A8I5KX85	A0A8I5KX85_HUMAN	CDV3	Isoform of Q9UKY7, CDV3 homolog
24.0345	21.2096	Q8IXS8	A0A804HIT6;Q8IXS8	HYCC2_HUMAN	HYCC2	Hyccin 2
24.0376	22.7626	Q52LA3	B3KN83;Q52LA3	LIN52_HUMAN	LIN52	Protein lin-52 homolog
24.0416	27.3421	O60248;O60248-2	O60248-2;O60248	SOX15_HUMAN	SOX15	Protein SOX-15
24.0452	22.5066	Q2M296;Q2M296-2	Q2M296-4;Q2M296-2;Q2M296-3;F5H0M7;Q2M296	MTHSD_HUMAN	MTHFSD	Methenyltetrahydrofolate synthase domain-containing protein
24.0492	NaN	K7EL68	K7EL68	K7EL68_HUMAN	CDC37	Isoform of Q16543, Cell division cycle 37, HSP90 cochaperone (Fragment)
24.0507	22.4421	P13056	P13056-2;P13056-3;A0A087WUK4;P13056	NR2C1_HUMAN	NR2C1	Nuclear receptor subfamily 2 group C member 1
24.0532	23.5934	A2RUS2;A2RUS2-2	H0YAY3;E9PF32;A2RUS2-2;A2RUS2	DEND3_HUMAN	DENND3	DENN domain-containing protein 3
24.057	22.4045	P42679;P42679-2;P42679-3	K7EQY5;P42679-2;P42679-3;P42679	MATK_HUMAN	MATK	Megakaryocyte-associated tyrosine-protein kinase
24.0575	22.769	Q6P1M9	S4R3L0;S4R3L5;Q6P1M9	ARMX5_HUMAN	ARMCX5	Armadillo repeat-containing X-linked protein 5
24.0592	25.1341	P31431	P31431-2;P31431	SDC4_HUMAN	SDC4	Syndecan-4
24.0595	22.3597	Q9Y5W9;Q9Y5W9-2	J3KTN6;Q9Y5W9-2;J3QLV8;J3QRB9;Q9Y5W9	SNX11_HUMAN	SNX11	Sorting nexin-11
24.0652	24.0451	P53667;P53667-2;P53667-4	E9PC47;P53667-2;P53667-4;P53667	LIMK1_HUMAN	LIMK1	LIM domain kinase 1
24.0668	23.1598	Q9HCM4;Q9HCM4-3;Q9HCM4-4	Q9HCM4-2;Q9HCM4-3;Q9HCM4-4;Q9HCM4	E41L5_HUMAN	EPB41L5	Band 4.1-like protein 5
24.0686	24.0882	O15120;O15120-2	O15120-2;O15120	PLCB_HUMAN	AGPAT2	1-acyl-sn-glycerol-3-phosphate acyltransferase beta
24.0691	23.5382	Q8TDR0;Q8TDR0-2	Q8TDR0-2;Q8TDR0	MIPT3_HUMAN	TRAF3IP1	TRAF3-interacting protein 1
24.0714	23.7575	Q7L3T8	Q7L3T8	SYPM_HUMAN	PARS2	Probable proline--tRNA ligase, mitochondrial
24.0745	21.058	O96011	O96011-2;O96011	PX11B_HUMAN	PEX11B	Peroxisomal membrane protein 11B
24.0754	30.4392	P04406-2	P04406-2	G3P_HUMAN	GAPDH	Isoform of P04406, Isoform 2 of Glyceraldehyde-3-phosphate dehydrogenase
24.0762	NaN	Q9Y5Z0;Q9Y5Z0-2;Q9Y5Z0-4;Q9Y5Z0-5	Q9Y5Z0-2;Q9Y5Z0-3;Q9Y5Z0-4;Q9Y5Z0-5;Q9Y5Z0	BACE2_HUMAN	BACE2	Beta-secretase 2
24.0784	24.3425	Q9NWQ9	Q9NWQ9	CN119_HUMAN	C14orf119	Uncharacterized protein C14orf119
24.0788	23.3819	Q8IYU2	Q8IYU2-4;Q8IYU2	HACE1_HUMAN	HACE1	E3 ubiquitin-protein ligase HACE1
24.0791	21.0857	Q9UHA2	Q9UHA2	S18L2_HUMAN	SS18L2	SS18-like protein 2
24.0809	23.8816	O00767	O00767	SCD_HUMAN	SCD	Stearoyl-CoA desaturase
24.0817	22.5159	Q8WU58	Q8WU58	F222B_HUMAN	FAM222B	Protein FAM222B
24.0889	21.6545	Q9BX70	K7ENV9;Q9BX70	BTBD2_HUMAN	BTBD2	BTB/POZ domain-containing protein 2
24.0919	20.4312	Q16533	Q16533	SNPC1_HUMAN	SNAPC1	snRNA-activating protein complex subunit 1
24.0943	24.5745	O00194	O00194	RB27B_HUMAN	RAB27B	Ras-related protein Rab-27B
24.0944	23.602	Q8WVN8;Q8WVN8-4	H3BN94;E9PHD0;Q8WVN8-2;Q8WVN8-3;Q8WVN8-4;Q8WVN8	UB2Q2_HUMAN	UBE2Q2	Ubiquitin-conjugating enzyme E2 Q2
24.0973	21.7168	Q15119	D6RJH7;D6RHG2;D6RGV8;D6RDN9;D6R983;Q15119-2;Q15119	PDK2_HUMAN	PDK2	[Pyruvate dehydrogenase (acetyl-transferring)] kinase isozyme 2, mitochondrial
24.1014	23.5978	Q9Y2E5;Q9Y2E5-2	Q9Y2E5-2;H0YA68;E9PCD7;Q9Y2E5	MA2B2_HUMAN	MAN2B2	Epididymis-specific alpha-mannosidase
24.1015	23.2844	Q9GZM8;Q9GZM8-2;Q9GZM8-3	J3KRK9;Q9GZM8-2;Q9GZM8-3;A6NIZ0;J3QL85;Q9GZM8	NDEL1_HUMAN	NDEL1	Nuclear distribution protein nudE-like 1
24.1019	24.9532	Q53HV7	Q53HV7	SMUG1_HUMAN	SMUG1	Single-strand selective monofunctional uracil DNA glycosylase
24.103	24.3141	Q2VPB7	Q2VPB7	AP5B1_HUMAN	AP5B1	AP-5 complex subunit beta-1
24.1034	24.9378	Q14BN4;Q14BN4-2;Q14BN4-3	Q14BN4-2;Q14BN4-3;Q14BN4-4;Q14BN4-5;Q14BN4-8;A0A590UJS6;A0A590UJK3;A0A590UJP6;H7BZW9;H7BZK0;H7C5G9;H7C3M8;A0A5F9VB99;A0A994J7U9;A0A994J5K5;A0A994J4X9;A0A994J4X6;A0A994J562;A0A994J558;Q14BN4	SLMAP_HUMAN	SLMAP	Sarcolemmal membrane-associated protein
24.1036	24.6442	A0A994J5B1;H0Y5B0	H0Y5B0;A0A994J5B1	A0A994J5B1_HUMAN;H0Y5B0_HUMAN	EPB41L2	Isoform of O43491, Erythrocyte membrane protein band 4.1 like 2
24.1061	25.0914	Q5D862	Q5D862	FILA2_HUMAN	FLG2	Filaggrin-2
24.1076	20.7217	Q3SXY8	A0A7P0T969;A0A7P0T9C1;A0A7P0T892;A0A7P0TAS1;A0A7P0Z473;Q3SXY8	AR13B_HUMAN	ARL13B	ADP-ribosylation factor-like protein 13B
24.1091	24.8501	A2RU67	A2RU67	F234B_HUMAN	FAM234B	Protein FAM234B
24.1109	25.7156	Q13029;Q13029-3	Q13029-2;Q13029-3;Q13029-5;Q13029	PRDM2_HUMAN	PRDM2	PR domain zinc finger protein 2
24.1174	23.9588	A0A804HKC3	A0A804HKC3	A0A804HKC3_HUMAN	PRRC2B	Isoform of Q5JSZ5, Proline rich coiled-coil 2B (Fragment)
24.1197	28.7819	Q5SNV9;Q5SNV9-2	Q5SNV9-2;H0Y5F2;H0Y5L4;H7BXQ2;A0A8I5KXP5;Q5SNV9	CA167_HUMAN	C1orf167	Uncharacterized protein C1orf167
24.1197	22.0225	Q96N46	Q96N46-2;Q96N46-3;Q96N46	TTC14_HUMAN	TTC14	Tetratricopeptide repeat protein 14
24.1201	21.655	Q15834	Q15834	CC85B_HUMAN	CCDC85B	Coiled-coil domain-containing protein 85B
24.1235	23.1198	Q5VWN6	Q5VWN6-2;A0A2R8YH03;A0A8V8TMM4;A0A8V8TMN1;A0A8Q3SI29;A0A8Q3SI68;A0A8Q3SI84;Q5VWN6	TASO2_HUMAN	TASOR2	Protein TASOR 2
24.1238	19.597	Q13487	M0QXY9;Q13487	SNPC2_HUMAN	SNAPC2	snRNA-activating protein complex subunit 2
24.1255	28.0559	O43567	C9J8T4;C9J383;F8WDJ5;C9JYY4;C9JYN7;C9JU37;C9JRV0;O43567	RNF13_HUMAN	RNF13	E3 ubiquitin-protein ligase RNF13
24.1264	24.5891	A0A140TA76;K7EMZ9	A0A140TA76;K7EMZ9	A0A140TA76_HUMAN;K7EMZ9_HUMAN	LSM14A	Isoform of Q8ND56, Protein LSM14 homolog A (Fragment)
24.1275	23.3448	Q7Z5Y7	Q7Z5Y7	KCD20_HUMAN	KCTD20	BTB/POZ domain-containing protein KCTD20
24.13	24.0597	Q8TDH9	A0A0D9SEU2;Q8TDH9-2;A0A0A0MTN6;G5E931;H3BN57;Q8TDH9	BL1S5_HUMAN	BLOC1S5	Biogenesis of lysosome-related organelles complex 1 subunit 5
24.1314	25.4816	Q6P3S1	Q6P3S1	DEN1B_HUMAN	DENND1B	DENN domain-containing protein 1B
24.1336	24.5993	H0YC40	H0YC40	H0YC40_HUMAN	CD47	Isoform of Q08722, CD47 molecule (Fragment)
24.137	23.7568	Q17R89;Q17R89-2;Q17R89-3	J3KRS3;E7ERK8;Q17R89-2;Q17R89-3;F5H6L3;Q17R89	RHG44_HUMAN	ARHGAP44	Rho GTPase-activating protein 44
24.1381	22.4464	Q9NVA4	Q9NVA4	T184C_HUMAN	TMEM184C	Transmembrane protein 184C
24.1384	23.9155	Q9UMN6	A0A8I5KR41;A0A8I5KWS6;A0A669KBD5;A0A669KBI7;Q9UMN6	KMT2B_HUMAN	KMT2B	Histone-lysine N-methyltransferase 2B
24.139	23.2405	Q13163;Q13163-2;Q13163-3;Q13163-4	A6NK28;Q13163-2;Q13163-3;Q13163-4;Q13163	MP2K5_HUMAN	MAP2K5	Dual specificity mitogen-activated protein kinase kinase 5
24.1397	22.0794	Q8WVZ9	Q8WVZ9	KBTB7_HUMAN	KBTBD7	Kelch repeat and BTB domain-containing protein 7
24.1416	23.1535	Q86UW6;Q86UW6-2	H0YA93;Q86UW6-2;Q86UW6	N4BP2_HUMAN	N4BP2	NEDD4-binding protein 2
24.1427	23.2439	Q14142	Q14142-2;Q14142-3;Q14142	TRI14_HUMAN	TRIM14	Tripartite motif-containing protein 14
24.1449	22.1293	Q8IX15;Q8IX15-3	U3KPW8;A0A669KB72;Q8IX15-3;Q8IX15	HOMEZ_HUMAN	HOMEZ	Homeobox and leucine zipper protein Homez
24.1491	22.3809	P31146	H3BRY3;P31146	COR1A_HUMAN	CORO1A	Coronin-1A
24.1512	21.5825	Q15375;Q15375-4	A0A7P0TBL4;A0A7P0TA58;Q15375-2;Q15375-4;Q15375	EPHA7_HUMAN	EPHA7	Ephrin type-A receptor 7
24.155	23.7315	Q53QV2	B5MBX5;B5MCP4;Q53QV2	LBH_HUMAN	LBH	Protein LBH
24.1613	25.133	Q9NRP4	F8W9V1;Q9NRP4	SDHF3_HUMAN	SDHAF3	Succinate dehydrogenase assembly factor 3, mitochondrial
24.1663	22.7871	Q96DR8	F8VV13;Q96DR8	MUCL1_HUMAN	MUCL1	Mucin-like protein 1
24.1665	23.7397	Q13542	Q13542	4EBP2_HUMAN	EIF4EBP2	Eukaryotic translation initiation factor 4E-binding protein 2
24.1683	25.8164	P78559;P78559-2	E9PGC8;P78559-2;P78559	MAP1A_HUMAN	MAP1A	Microtubule-associated protein 1A
24.1824	25.1635	Q9BPX6;Q9BPX6-2;Q9BPX6-3	A0A0U1RRK1;Q9BPX6-2;Q9BPX6-3;Q9BPX6-4;Q9BPX6-5;A0A286YF11;E9PQV6;Q9BPX6	MICU1_HUMAN	MICU1	Calcium uptake protein 1, mitochondrial
24.1836	23.7853	Q6PHR2;Q6PHR2-3	Q6PHR2-3;Q6PHR2-4;Q6PHR2	ULK3_HUMAN	ULK3	Serine/threonine-protein kinase ULK3
24.1897	26.4307	P26232-3	A0A0A0MTJ6;A0A0A0MRI5;P26232-2;P26232-3;P26232-4;P26232-5;P26232-6;P26232	CTNA2_HUMAN	CTNNA2	Isoform of P26232, Isoform 3 of Catenin alpha-2
24.1904	26.0304	Q9BQ95	J3KTF5;Q9BQ95-3;Q9BQ95	ECSIT_HUMAN	ECSIT	Evolutionarily conserved signaling intermediate in Toll pathway, mitochondrial
24.191	20.7877	Q86WH2	A0A1B0GUG6;Q86WH2	RASF3_HUMAN	RASSF3	Ras association domain-containing protein 3
24.1956	23.0938	Q7Z309;Q7Z309-2	G1UD79;Q7Z309-2;Q7Z309-3;Q7Z309-4;Q7Z309-5;Q7Z309	PBIR2_HUMAN	PABIR2	PABIR family member 2
24.1997	22.3896	O95672;O95672-2	O95672-2;O95672	ECEL1_HUMAN	ECEL1	Endothelin-converting enzyme-like 1
24.2005	21.4323	O75084;Q14332	Q14332;O75084	FZD2_HUMAN;FZD7_HUMAN	FZD2;FZD7	Frizzled-7
24.2005	24.8743	Q14191	Q14191	WRN_HUMAN	WRN	Bifunctional 3'-5' exonuclease/ATP-dependent helicase WRN
24.2009	22.7825	O94952;O94952-1	O94952-1;H0YIE9;O94952	FBX21_HUMAN	FBXO21	F-box only protein 21
24.2013	25.4547	Q8NBZ7;Q8NBZ7-2	A0A6Q8PGM4;C9JW33;Q8NBZ7-2;Q8NBZ7	UXS1_HUMAN	UXS1	UDP-glucuronic acid decarboxylase 1
24.2017	23.6783	Q9NPG3;Q9NPG3-2	Q9NPG3-2;K7EJT1;Q9NPG3	UBN1_HUMAN	UBN1	Ubinuclein-1
24.2023	21.3962	Q96L58	Q96L58	B3GT6_HUMAN	B3GALT6	Beta-1,3-galactosyltransferase 6
24.2024	24.7703	Q5VWG9	A0A8I5KR98;Q5VWG9	TAF3_HUMAN	TAF3	Transcription initiation factor TFIID subunit 3
24.207	23.384	O00748;O00748-4	O00748-2;O00748-4;O00748-5;J3QSC0;O00748	EST2_HUMAN	CES2	Cocaine esterase
24.2096	21.6458	P46531	A0A7P0T8U6;A0A7P0T8W1;A0A7P0TA56;A0A7P0TB20;P46531	NOTC1_HUMAN	NOTCH1	Neurogenic locus notch homolog protein 1
24.2106	25.8205	Q9H2F5;Q9H2F5-2;Q9H2F5-3	Q9H2F5-2;Q9H2F5-3;A0A590UJN0;Q9H2F5	EPC1_HUMAN	EPC1	Enhancer of polycomb homolog 1
24.2116	25.0645	Q96CP6;Q96CP6-2;Q96CP6-3	M0QZ12;Q96CP6-2;Q96CP6-3;Q96CP6	ASTRA_HUMAN	GRAMD1A	Protein Aster-A
24.213	24.4485	O14713	C9J6Y2;C9J5T5;A8MPU2;C9J0J6;C9JZ07;O14713-2;C9JBU8;G3V1A3;O14713	ITBP1_HUMAN	ITGB1BP1	Integrin beta-1-binding protein 1
24.2142	24.1416	Q08722	H7BYS8;Q08722	CD47_HUMAN	CD47	Leukocyte surface antigen CD47
24.2154	24.8411	Q9BX10;Q9BX10-2;Q9BX10-4	Q9BX10-2;Q9BX10-3;Q9BX10-4;Q9BX10	GTPB2_HUMAN	GTPBP2	GTP-binding protein 2
24.2159	22.8317	Q8NDF8-5	E9PC61;A0A7N4YH79;Q8NDF8-2;Q8NDF8-3;Q8NDF8-5;Q8NDF8	PAPD5_HUMAN	TENT4B	Isoform of Q8NDF8, Isoform 5 of Terminal nucleotidyltransferase 4B
24.2226	25.8933	Q8NDV3;Q8NDV3-2	Q8NDV3-2;Q8NDV3	SMC1B_HUMAN	SMC1B	Structural maintenance of chromosomes protein 1B
24.2227	23.8739	Q969S2;Q969S2-2;Q969S2-4	Q969S2-2;Q969S2-3;Q969S2-4;Q969S2	NEIL2_HUMAN	NEIL2	Endonuclease 8-like 2
24.2268	24.9087	A0A0G2JPD3;A0A140T8W8;A0A140T8Y4;A0A1W2PPF8;A0A1W2PR61;Q5SPM2	Q5SPM2;A0A1W2PPF8;A0A1W2PR61;A0A140T8W8;A0A140T8Y4;A0A0G2JPD3	A0A0G2JPD3_HUMAN;A0A140T8W8_HUMAN;A0A140T8Y4_HUMAN;A0A1W2PPF8_HUMAN;A0A1W2PR61_HUMAN;Q5SPM2_HUMAN	HLA-A	Isoform of P04439, HLA class I histocompatibility antigen, A alpha chain
24.2284	25.2236	Q9NYP7;Q9NYP7-2	Q9NYP7-2;Q9NYP7	ELOV5_HUMAN	ELOVL5	Elongation of very long chain fatty acids protein 5
24.2293	24.7202	Q92830	K7ERS6;Q92830	KAT2A_HUMAN	KAT2A	Histone acetyltransferase KAT2A
24.2303	23.7275	Q96BT3	H3BTR4;Q96BT3	CENPT_HUMAN	CENPT	Centromere protein T
24.2315	23.5521	Q1MSJ5;Q1MSJ5-1	A0A6Q8PGS3;A0A6Q8PF61;A0A6Q8PF96;A0A6Q8PHN8;Q1MSJ5-1;Q1MSJ5-2;A0A7I2PHE7;A0A7I2YQH9;A0A7I2YQX1;A0A7I2V2I3;A0A7I2V2P7;A0A7I2V398;A0A7I2V372;A0A7I2V3F0;A0A7I2V3G6;A0A7I2V3M9;A0A7I2V3Q0;A0A7I2V425;A0A7I2V450;A0A7I2V3Z9;A0A7I2V3V5;A0A7I2V3W2;A0A7I2V4L2;A0A7I2V571;A0A7I2V4R5;A0A7I2V5G7;A0A7I2V5A7;A0A7I2V5N5;A0A7I2V5P5;A0A7I2V5J9;A0A7I2V5L8;A0A7I2V5W3;Q1MSJ5	CSPP1_HUMAN	CSPP1	Centrosome and spindle pole-associated protein 1
24.2319	23.8259	Q9NXV2	H3BSS5;Q9NXV2	KCTD5_HUMAN	KCTD5	BTB/POZ domain-containing protein KCTD5
24.2356	23.5131	P63316	C9JDI3;P63316	TNNC1_HUMAN	TNNC1	Troponin C, slow skeletal and cardiac muscles
24.2371	23.8884	Q96CD2;Q96CD2-2	H3BU63;H3BSE3;H3BRQ0;H3BQB0;Q96CD2-2;Q96CD2	COAC_HUMAN	PPCDC	Phosphopantothenoylcysteine decarboxylase
24.2388	22.7561	Q92968	Q92968	PEX13_HUMAN	PEX13	Peroxisomal membrane protein PEX13
24.2399	25.1672	Q9UDX5	F8WEN7;B5MC22;Q9UDX5-2;Q9UDX5	MTFP1_HUMAN	MTFP1	Mitochondrial fission process protein 1
24.2428	24.3791	O95793;O95793-2;O95793-3	O95793-2;O95793-3;Q5JW28;Q5JW30;O95793	STAU1_HUMAN	STAU1	Double-stranded RNA-binding protein Staufen homolog 1
24.2437	20.1214	Q6ZN40	Q6ZN40	Q6ZN40_HUMAN	TPM1	Isoform of P09493, Tropomyosin 1
24.2458	26.3447	Q9UBQ6	C9JEG3;Q9UBQ6	EXTL2_HUMAN	EXTL2	Exostosin-like 2
24.2516	23.9666	Q9BY49	B4DJS2;Q9BY49	PECR_HUMAN	PECR	Peroxisomal trans-2-enoyl-CoA reductase
24.2537	22.6941	Q9P0K1-2	H7C3I4;H7C0Q9;Q9P0K1-2;Q9P0K1-5;Q9P0K1	ADA22_HUMAN	ADAM22	Isoform of Q9P0K1, Isoform 2 of Disintegrin and metalloproteinase domain-containing protein 22
24.257	24.0555	Q32MZ4-4	Q32MZ4-4;A0A8V8TLX7	LRRF1_HUMAN	LRRFIP1	Isoform of Q32MZ4, Isoform 4 of Leucine-rich repeat flightless-interacting protein 1
24.2652	28.5929	D6REC4	A0A499FIZ3;D6REC4	CFA99_HUMAN	CFAP99	Cilia- and flagella-associated protein 99
24.2678	23.4704	Q96N66	C9J4E9;Q96N66-3;A9C4B8;A0A0G2JNX6;H7C2M4;Q96N66	MBOA7_HUMAN	MBOAT7	Lysophospholipid acyltransferase 7
24.268	23.1077	Q9GZN1	F8VSD1;F8VRL1;F8W057;G3V1Y1;Q9GZN1	ARP6_HUMAN	ACTR6	Actin-related protein 6
24.2681	26.4245	Q9P1U1;Q9P1U1-2	Q9P1U1-2;Q9P1U1-3;Q9P1U1	ARP3B_HUMAN	ACTR3B	Actin-related protein 3B
24.27	25.4328	Q96QD9	Q96QD9-2;Q96QD9-3;H9KVC6;Q96QD9	UIF_HUMAN	FYTTD1	UAP56-interacting factor
24.2736	26.4062	O94768	C9JZJ1;O94768	ST17B_HUMAN	STK17B	Serine/threonine-protein kinase 17B
24.2776	22.2684	Q9NQX6	E7ETJ5;Q9NQX6	ZN331_HUMAN	ZNF331	Zinc finger protein 331
24.2797	20.9107	Q9P2S5	J3KTP2;A0A0A0MRV3;Q9P2S5	WRP73_HUMAN	WRAP73	WD repeat-containing protein WRAP73
24.2805	NaN	Q1MX18;Q1MX18-2;Q1MX18-4;Q1MX18-5;Q1MX18-6	Q1MX18-2;Q1MX18-4;Q1MX18-5;Q1MX18-6;A0A0A0MSI1;Q1MX18	INSC_HUMAN	INSC	Protein inscuteable homolog
24.2826	25.853	O60506-2	A0A7I2V2F2;A0A7I2V309;O60506-2;O60506	HNRPQ_HUMAN	SYNCRIP	Isoform of O60506, Isoform 2 of Heterogeneous nuclear ribonucleoprotein Q
24.286	21.9711	Q96PY6;Q96PY6-2;Q96PY6-3;Q96PY6-4;Q96PY6-6	A0A8I5QJM8;Q96PY6-2;Q96PY6-3;Q96PY6-4;Q96PY6-5;Q96PY6-6;H0Y8M6;A0A8I5KQ77;A0A8I5KRM5;A0A8I5KSI3;A0A8I5KUL6;A0A8I5KWD5;Q96PY6	NEK1_HUMAN	NEK1	Serine/threonine-protein kinase Nek1
24.2862	23.558	O14810	D6RI11;O14810	CPLX1_HUMAN	CPLX1	Complexin-1
24.2871	23.3754	D6RIF6;H0Y9L2	D6RIF6;H0Y9L2	D6RIF6_HUMAN;H0Y9L2_HUMAN	SLAIN2	Isoform of Q9P270, SLAIN motif family member 2
24.2928	25.5776	P56589	P56589	PEX3_HUMAN	PEX3	Peroxisomal biogenesis factor 3
24.2946	25.1182	Q5UCC4;Q5UCC4-2	Q5UCC4-2;M0R2A0;Q5UCC4	EMC10_HUMAN	EMC10	ER membrane protein complex subunit 10
24.2948	27.9162	A6NI56	H3BS06;B7ZBA8;A0A590PWR5;A6NI56	CC154_HUMAN	CCDC154	Coiled-coil domain-containing protein 154
24.2949	21.9173	Q02487	A0A3B3ISU0;Q02487	DSC2_HUMAN	DSC2	Desmocollin-2
24.2956	25.0953	Q96LT9;Q96LT9-2	Q96LT9-2;H0YEB8;Q96LT9	RNPC3_HUMAN	RNPC3	RNA-binding region-containing protein 3
24.297	23.9734	Q6ZYL4	Q6ZYL4	TF2H5_HUMAN	GTF2H5	General transcription factor IIH subunit 5
24.3016	21.9513	Q9NVF7	Q9NVF7	FBX28_HUMAN	FBXO28	F-box only protein 28
24.3025	23.5143	Q96KM6	Q96KM6	Z512B_HUMAN	ZNF512B	Zinc finger protein 512B
24.3037	26.8196	Q13670	Q13670	PM2PB_HUMAN	PMS2P11	Putative postmeiotic segregation increased 2-like protein 11
24.3041	19.4584	P47974	G3V2P5;G3V2D5;Q07352;P47974	TISD_HUMAN	ZFP36L2	mRNA decay activator protein ZFP36L2
24.3112	24.2009	A0A3B3ISJ8	A0A3B3ISJ8	A0A3B3ISJ8_HUMAN	CLIP1	Isoform of P30622, CAP-Gly domain containing linker protein 1 (Fragment)
24.312	25.0785	Q5T6C5	A0A804HI28;A0A804HIX1;A0A804HIT1;A0A804HJY2;Q5T6C5	AT7L2_HUMAN	ATXN7L2	Ataxin-7-like protein 2
24.3123	24.1539	Q15118	C9IYB4;F8WEJ6;F8WC75;C9JKT3;Q15118-2;Q15118	PDK1_HUMAN	PDK1	[Pyruvate dehydrogenase (acetyl-transferring)] kinase isozyme 1, mitochondrial
24.3162	24.4163	Q92624	Q92624	APBP2_HUMAN	APPBP2	Amyloid protein-binding protein 2
24.3168	23.7295	Q96MG8;Q96MG8-2	Q96MG8-2;Q96MG8	PCMD1_HUMAN	PCMTD1	Protein-L-isoaspartate O-methyltransferase domain-containing protein 1
24.3185	23.3922	Q6NXT4;Q6NXT4-2;Q6NXT4-4	Q6NXT4-2;Q6NXT4-3;Q6NXT4-4;B5MCR8;Q6NXT4	ZNT6_HUMAN	SLC30A6	Zinc transporter 6
24.3205	24.4657	Q13155-2	Q13155-2	AIMP2_HUMAN	AIMP2	Isoform of Q13155, Isoform 2 of Aminoacyl tRNA synthase complex-interacting multifunctional protein 2
24.3219	21.7577	Q9BX46;Q9H0Z9;Q9H0Z9-2	H0YA61;F6VZ39;Q9H0Z9-2;Q9H0Z9;Q9BX46	RBM24_HUMAN;RBM38_HUMAN	RBM24;RBM38	RNA-binding protein 24
24.3222	22.1192	A0A2R8Y5A6;A0A2R8YDM9;A0A2R8YGV1	A0A2R8Y5A6;A0A2R8YGV1;A0A2R8YDM9	A0A2R8Y5A6_HUMAN;A0A2R8YDM9_HUMAN;A0A2R8YGV1_HUMAN	ATXN2	Isoform of Q99700, Ataxin 2
24.3228	23.899	Q14CB8;Q14CB8-2;Q14CB8-3;Q14CB8-7	Q14CB8-2;Q14CB8-3;Q14CB8-7;Q14CB8	RHG19_HUMAN	ARHGAP19	Rho GTPase-activating protein 19
24.3277	24.5547	Q8WYA0	H0YHE2;Q8WYA0	IFT81_HUMAN	IFT81	Intraflagellar transport protein 81 homolog
24.3305	23.4326	Q9UI08;Q9UI08-2	Q9UI08-2;Q9UI08-3;Q9UI08-4;Q9UI08	EVL_HUMAN	EVL	Ena/VASP-like protein
24.3315	20.7352	Q8NI37	Q8NI37	PPTC7_HUMAN	PPTC7	Protein phosphatase PTC7 homolog
24.3342	24.1491	O00763;O00763-2	O00763-2;F5H5C3;O00763	ACACB_HUMAN	ACACB	Acetyl-CoA carboxylase 2
24.3348	25.1193	Q9Y6P5-2	Q9Y6P5-2;Q9Y6P5-3;Q9Y6P5	SESN1_HUMAN	SESN1	Isoform of Q9Y6P5, Isoform T1 of Sestrin-1
24.3358	22.5887	O95479;O95479-2	O95479-2;O95479	G6PE_HUMAN	H6PD	GDH/6PGL endoplasmic bifunctional protein
24.3383	24.0491	Q7Z6R9	Q92754-2;C1K3N0;C9JXZ2;H7C5E5;Q92481-2;A0A6E1XE14;P05549-2;P05549-5;P05549-6;Q7Z6R9;Q92754;Q6VUC0;Q92481;P05549	AP2D_HUMAN	TFAP2D	Transcription factor AP-2-delta
24.3391	24.5604	P18065	C9JW52;C9JMY1;P18065	IBP2_HUMAN	IGFBP2	Insulin-like growth factor-binding protein 2
24.3395	22.5746	Q9HBE1;Q9HBE1-2;Q9HBE1-3;Q9HBE1-4	Q9HBE1-2;Q9HBE1-3;Q9HBE1-4;Q9HBE1	PATZ1_HUMAN	PATZ1	POZ-, AT hook-, and zinc finger-containing protein 1
24.3427	25.6989	Q8TEP8	Q8TEP8-1;Q8TEP8-2;H0Y966;A0A0A0MR42;K7ENP4;K7EPA2;Q8TEP8	CE192_HUMAN	CEP192	Centrosomal protein of 192 kDa
24.3444	21.8541	Q13233	Q13233	M3K1_HUMAN	MAP3K1	Mitogen-activated protein kinase kinase kinase 1
24.3455	24.1998	A6NDB9	A0A590UJ23;A0A590UJ36;K7EKN5;A6NDB9	PALM3_HUMAN	PALM3	Paralemmin-3
24.3476	24.6791	Q9UKL6;Q9UKL6-2	Q9UKL6-2;I3L4Z8;I3L3H0;I3L2M9;Q9UKL6	PPCT_HUMAN	PCTP	Phosphatidylcholine transfer protein
24.353	24.587	Q9BTT6	Q9BTT6	LRRC1_HUMAN	LRRC1	Leucine-rich repeat-containing protein 1
24.355	22.377	Q9HAH7;Q9HAH7-1	J3KNZ9;Q9HAH7-1;Q9HAH7	FBRS_HUMAN	FBRS	Probable fibrosin-1
24.3571	21.9765	Q5SQN1;Q5SQN1-2	A0A7P0T9T2;A0A7P0T8U4;A0A7P0T899;Q5SQN1-2;H7C3C7;A0A7P0Z4P6;U3KPT7;A0A087X0B7;A0A087X2J6;Q5SQN1	SNP47_HUMAN	SNAP47	Synaptosomal-associated protein 47
24.3604	25.7855	P23025	F2Z2T2;P23025	XPA_HUMAN	XPA	DNA repair protein complementing XP-A cells
24.3613	23.5168	Q96G04;Q96G04-2	H0YDM8;H0YD24;Q96G04-2;E9PQV7;E9PNH4;E9PLC7;E9PN63;Q8N7N1-2;K7EQE4;K7ES84;A0A8I5KZ44;Q8N7N1;Q96G04;P0C5J1;A6NEL3	EF2KT_HUMAN	EEF2KMT	Protein-lysine N-methyltransferase EEF2KMT
24.3656	24.8723	A0A7P0Z4M5	A0A7P0Z4M5	A0A7P0Z4M5_HUMAN	CC2D1A	Isoform of Q6P1N0, Coiled-coil and C2 domain containing 1A (Fragment)
24.3735	27.0871	Q9NV66	Q6NUM6-2;A0A087WWV6;Q6NUM6;Q9NV66	TYW1_HUMAN	TYW1	S-adenosyl-L-methionine-dependent tRNA 4-demethylwyosine synthase TYW1
24.376	20.7307	P69849	J3KN36;A0A087WTD5;Q5JPE7-2;Q5JPE7-3;A0A7I2V2Z5;A0A7I2V3P4;A0A7I2V4T6;A0A7I2V6B0;Q5JPE7;P69849	NOMO3_HUMAN	NOMO3	BOS complex subunit NOMO3
24.378	23.3306	Q8NDX6	Q8NDX6	ZN740_HUMAN	ZNF740	Zinc finger protein 740
24.3785	25.7902	Q9UJT1-2	Q9UJT1-2;Q9UJT1-5;Q9UJT1-6;Q9UJT1	TBD_HUMAN	TUBD1	Isoform of Q9UJT1, Isoform 2 of Tubulin delta chain
24.3796	21.6238	Q9Y5Y5;Q9Y5Y5-2	E9PP98;E9PLS4;E9PMM3;Q9Y5Y5-2;Q9Y5Y5	PEX16_HUMAN	PEX16	Peroxisomal membrane protein PEX16
24.3812	25.6513	Q96QT6;Q96QT6-4	C9J9G2;Q96QT6-2;Q96QT6-3;Q96QT6-4;Q96QT6-5;K7EPF7;Q96QT6	PHF12_HUMAN	PHF12	PHD finger protein 12
24.3824	24.2647	Q6H8Q1;Q6H8Q1-2;Q6H8Q1-3;Q6H8Q1-4;Q6H8Q1-5;Q6H8Q1-6;Q6H8Q1-7;Q6H8Q1-8;Q6H8Q1-9	D6RAL0;F5GYR0;Q6H8Q1-2;Q6H8Q1-3;Q6H8Q1-4;Q6H8Q1-5;Q6H8Q1-6;Q6H8Q1-7;Q6H8Q1-8;Q6H8Q1-9;A0A7I2V5G9;Q6H8Q1	ABLM2_HUMAN	ABLIM2	Actin-binding LIM protein 2
24.3829	22.5982	Q9UQ16;Q9UQ16-2;Q9UQ16-3;Q9UQ16-4	H0YBC6;Q9UQ16-2;Q9UQ16-3;Q9UQ16-4;Q9UQ16-5;A0A8I5KXV5;E5RIK2;E5RHK8;Q9UQ16	DYN3_HUMAN	DNM3	Dynamin-3
24.3846	23.25	Q9BRY0;Q9BRY0-2	Q9BRY0-2;K7EJZ1;K7ENJ1;F5H385;K7EQS6;Q9BRY0	S39A3_HUMAN	SLC39A3	Zinc transporter ZIP3
24.3921	24.6342	Q9NYP9	Q9NYP9	MS18A_HUMAN	MIS18A	Protein Mis18-alpha
24.3926	23.9108	B5MCA1	B5MCA1	B5MCA1_HUMAN	CFAP36	Isoform of Q96G28, Cilia- and flagella-associated protein 36
24.3958	26.1953	Q68D10-2	Q68D10-2;Q68D10-3;Q68D10	SPT2_HUMAN	SPTY2D1	Isoform of Q68D10, Isoform 2 of Protein SPT2 homolog
24.3962	25.0169	P01112;P01112-2	P01112-2;A0A804HJ06;A0A8C8MQR2;P01112	RASH_HUMAN	HRAS	GTPase HRas
24.4093	24.0526	A9QM74	A9QM74	IMA8_HUMAN	KPNA7	Importin subunit alpha-8
24.4118	24.1984	Q12929	A0A2R8Y4W2;A0A2R8YE63;Q12929-2;Q12929	EPS8_HUMAN	EPS8	Epidermal growth factor receptor kinase substrate 8
24.4139	23.9875	Q2LD37;Q2LD37-4	H3BLT5;A0A7P0T938;H0Y781;A0A8I5KRW6;A0A8I5KQV3;Q2LD37-4;Q2LD37	BLTP1_HUMAN	BLTP1	Bridge-like lipid transfer protein family member 1
24.4179	24.1713	Q29983	A0A1W2PPN1;A0A1W2PRA6;Q96QC4;A0A024RCL3;Q29983	MICA_HUMAN	MICA	MHC class I polypeptide-related sequence A
24.4196	26.0059	Q12841	Q12841-2;Q12841	FSTL1_HUMAN	FSTL1	Follistatin-related protein 1
24.42	25.3038	Q9P2D0	E7EPI0;Q9P2D0-2;H0Y9N7;E9PDR5;Q9P2D0	IBTK_HUMAN	IBTK	Inhibitor of Bruton tyrosine kinase
24.4297	23.8929	Q96PV7;Q96PV7-2;Q96PV7-3	H0YCX2;Q96PV7-2;Q96PV7-3;Q96PV7	F193B_HUMAN	FAM193B	Protein FAM193B
24.4314	24.7021	Q9H4I2	Q9H4I2-2;H0Y6F5;Q9H4I2	ZHX3_HUMAN	ZHX3	Zinc fingers and homeoboxes protein 3
24.432	23.3621	Q9UGY1	V9GYY5;Q9UGY1	NOL12_HUMAN	NOL12	Nucleolar protein 12
24.4332	24.7171	A2RUC4	A2RUC4	TYW5_HUMAN	TYW5	tRNA wybutosine-synthesizing protein 5
24.4345	15.8669	Q14934;Q14934-10;Q14934-12;Q14934-13;Q14934-19;Q14934-2;Q14934-20;Q14934-3;Q14934-4;Q14934-5;Q14934-6;Q14934-7;Q14934-8;Q14934-9	Q14934-10;Q14934-12;Q14934-13;Q14934-19;Q14934-20;Q14934-22;Q14934-23;Q14934-2;Q14934-3;Q14934-4;Q14934-5;Q14934-6;Q14934-7;Q14934-8;Q14934-9;Q14934	NFAC4_HUMAN	NFATC4	Nuclear factor of activated T-cells, cytoplasmic 4
24.4374	25.0422	P55197;P55197-1	P55197-1;Q5JT35;P55197	AF10_HUMAN	MLLT10	Protein AF-10
24.4394	23.5568	Q53G59;Q53G59-2	Q53G59-2;J3QSX3;Q53G59	KLH12_HUMAN	KLHL12	Kelch-like protein 12
24.4436	21.4544	Q9BYE7	Q9BYE7-3;Q9BYE7	PCGF6_HUMAN	PCGF6	Polycomb group RING finger protein 6
24.4446	25.5615	P41440	C9J8K6;P41440-3;H3BTQ3;C9JKP4;E9PIL5;P41440	S19A1_HUMAN	SLC19A1	Reduced folate transporter
24.4464	20.8753	Q96MX3	A0A087WVT1;Q96MX3	ZNF48_HUMAN	ZNF48	Zinc finger protein 48
24.4528	23.3417	Q8NHG8	Q8NHG8	ZNRF2_HUMAN	ZNRF2	E3 ubiquitin-protein ligase ZNRF2
24.4531	24.9	Q13905;Q13905-2;Q13905-3;Q13905-4	H0Y6R4;A0A804HL87;Q13905-2;Q13905-3;Q13905-4;Q13905	RPGF1_HUMAN	RAPGEF1	Rap guanine nucleotide exchange factor 1
24.4597	21.5737	A0A0U1RRM4	A0A0U1RRM4	A0A0U1RRM4_HUMAN	PTBP1	Isoform of P26599, Polypyrimidine tract-binding protein 1
24.4614	21.717	Q71F56	H0YHC1;F8VRB8;A0A3B3IRX3;A0A3B3IS46;Q71F56	MD13L_HUMAN	MED13L	Mediator of RNA polymerase II transcription subunit 13-like
24.4627	25.1017	A0A0A0MR33;A0A0C4DFM0;G3V4T6;G3V5T0	G3V5T0;G3V4T6;G3V267;A0A0A0MR33;A0A0C4DFM0	A0A0A0MR33_HUMAN;A0A0C4DFM0_HUMAN;G3V4T6_HUMAN;G3V5T0_HUMAN	GSTZ1	Isoform of O43708, Glutathione S-transferase zeta 1
24.4634	25.9468	F8W696	F8W696	F8W696_HUMAN	APOA1	Isoform of P02647, Apolipoprotein A1
24.4634	24.0584	Q99638	F5H4F1;Q99638	RAD9A_HUMAN	RAD9A	Cell cycle checkpoint control protein RAD9A
24.4645	25.7849	Q9BV29;Q9BV29-2	H0YN78;H0YLN5;Q9BV29-2;Q9BV29	CCD32_HUMAN	CCDC32	Coiled-coil domain-containing protein 32
24.4659	23.2576	Q96L50	Q96L50	LLR1_HUMAN	LRR1	Leucine-rich repeat protein 1
24.4663	24.6737	Q8IVV7	K7ELH7;K7ENE2;Q8IVV7	GID4_HUMAN	GID4	Glucose-induced degradation protein 4 homolog
24.4714	20.6362	Q9BWG4;Q9BWG4-2	V9GYB2;Q9BWG4-2;U3KPY3;Q9BWG4	SSBP4_HUMAN	SSBP4	Single-stranded DNA-binding protein 4
24.472	24.4599	Q8N8D1	Q8N8D1	PDCD7_HUMAN	PDCD7	Programmed cell death protein 7
24.4728	NaN	Q9UHB4;Q9UHB4-2;Q9UHB4-4	Q9UHB4-2;Q9UHB4-3;Q9UHB4-4;Q9UHB4	NDOR1_HUMAN	NDOR1	NADPH-dependent diflavin oxidoreductase 1
24.4749	22.0609	Q9BZC7;Q9BZC7-2;Q9BZC7-3;Q9BZC7-4	H0Y8D6;Q9BZC7-2;Q9BZC7-3;Q9BZC7-4;A0A087WXK5;Q9BZC7	ABCA2_HUMAN	ABCA2	ATP-binding cassette sub-family A member 2
24.4755	24.7178	P68133	A6NL76;A0A804HKV3;P62736;P68133;P68032	ACTS_HUMAN	ACTA1	Actin, alpha skeletal muscle
24.4758	25.8489	Q9Y483;Q9Y483-4	Q9Y483-2;Q9Y483-3;Q9Y483-4;Q9Y483	MTF2_HUMAN	MTF2	Metal-response element-binding transcription factor 2
24.4815	24.3453	Q7Z7N9	Q7Z7N9	T179B_HUMAN	TMEM179B	Transmembrane protein 179B
24.484	25.2624	Q02078-2;Q02078-4;Q02078-6	Q02078-2;Q02078-4;Q02078-6;Q02078-7;Q02078-8	MEF2A_HUMAN	MEF2A	Isoform of Q02078, Isoform MEFA of Myocyte-specific enhancer factor 2A
24.487	23.0701	Q9Y605	Q9Y605	MOFA1_HUMAN	MRFAP1	MORF4 family-associated protein 1
24.4887	21.9269	Q6PJ61	Q6PJ61	FBX46_HUMAN	FBXO46	F-box only protein 46
24.4894	23.9619	Q9H568	Q9H568	ACTL8_HUMAN	ACTL8	Actin-like protein 8
24.4916	24.0835	P20933	P20933	ASPG_HUMAN	AGA	N(4)-(beta-N-acetylglucosaminyl)-L-asparaginase
24.4919	23.2537	Q9P242	A0A8V8N5G5;Q9P242	NYAP2_HUMAN	NYAP2	Neuronal tyrosine-phosphorylated phosphoinositide-3-kinase adapter 2
24.4939	23.1075	O14613	O14613	BORG1_HUMAN	CDC42EP2	Cdc42 effector protein 2
24.4971	22.4792	A0A8Q3WKT6	A0A8Q3WKT6	A0A8Q3WKT6_HUMAN	CD55	Isoform of P08174, CD55 molecule (Cromer blood group)
24.4971	24.1768	Q04724	Q04727-2;Q04727-3;Q04727-4;H7C4E4;A0A994J7T6;Q04724;Q04727	TLE1_HUMAN	TLE1	Transducin-like enhancer protein 1
24.4983	24.1904	Q92585	Q92585	MAML1_HUMAN	MAML1	Mastermind-like protein 1
24.4987	25.4269	P78310	P78310-7;P78310	CXAR_HUMAN	CXADR	Coxsackievirus and adenovirus receptor
24.4996	22.5017	O95685	O95685	PPR3D_HUMAN	PPP1R3D	Protein phosphatase 1 regulatory subunit 3D
24.5006	22.064	Q92581-3	A0A1B0GV11;A0A0D9SGH0;A0A0D9SFM4;Q92581-3	SL9A6_HUMAN	SLC9A6	Isoform of Q92581, Isoform 3 of Sodium/hydrogen exchanger 6
24.5049	25.5263	P46108-2	P46108-2	CRK_HUMAN	CRK	Isoform of P46108, Isoform Crk-I of Adapter molecule crk
24.5057	25.554	Q659A1	H0YNU9;H0YK97;Q659A1	ICE2_HUMAN	ICE2	Little elongation complex subunit 2
24.515	23.5744	Q9UET6-2	Q9UET6-2	TRM7_HUMAN	FTSJ1	Isoform of Q9UET6, Isoform 2 of Putative tRNA (cytidine(32)/guanosine(34)-2'-O)-methyltransferase
24.5208	25.8924	Q5PSV4;Q5PSV4-2	Q5PSV4-2;Q5PSV4	BRM1L_HUMAN	BRMS1L	Breast cancer metastasis-suppressor 1-like protein
24.522	24.2555	Q9UKT8	Q9UKT8-2;B4DT60;Q9UKT8	FBXW2_HUMAN	FBXW2	F-box/WD repeat-containing protein 2
24.5225	23.8524	Q01814;Q01814-5;Q01814-6;Q01814-8	A0A2R8Y4R4;A0A2U3U055;A0A2U3TZI3;Q01814-4;Q01814-5;Q01814-6;Q01814-7;Q01814-8;Q01814-2;Q01814-3;Q01814	AT2B2_HUMAN	ATP2B2	Plasma membrane calcium-transporting ATPase 2
24.5269	24.5826	Q9NZ43	M0QZE0;M0QYT5;Q9NZ43-2;Q9NZ43-3;Q9NZ43	USE1_HUMAN	USE1	Vesicle transport protein USE1
24.5335	24.7109	Q6ZMG9;Q6ZMG9-2	Q6ZMG9-2;Q6ZMG9	CERS6_HUMAN	CERS6	Ceramide synthase 6
24.5337	24.7264	Q8TEA7;Q8TEA7-2;Q8TEA7-3	Q8TEA7-2;Q8TEA7-3;Q8TEA7	TBCK_HUMAN	TBCK	TBC domain-containing protein kinase-like protein
24.5352	23.4738	Q8WV74;Q8WV74-2	Q8WV74-2;Q8WV74	NUDT8_HUMAN	NUDT8	Mitochondrial coenzyme A diphosphatase NUDT8
24.5357	22.7035	Q12770	Q12770-3;Q12770	SCAP_HUMAN	SCAP	Sterol regulatory element-binding protein cleavage-activating protein
24.5371	24.4369	O43766;O43766-3	O43766-3;A0A1X7SBR7;D6RCP8;A0A1W2PPM2;A0A1W2PQE9;A0A1W2PRE7;O43766	LIAS_HUMAN	LIAS	Lipoyl synthase, mitochondrial
24.5427	24.5046	Q8N3Y7	G3V145;Q8N3Y7	RDHE2_HUMAN	SDR16C5	Epidermal retinol dehydrogenase 2
24.5442	22.4513	Q0VF49;Q0VF49-2	Q0VF49-2;H7C5G6;Q0VF49	K2012_HUMAN	KIAA2012	Uncharacterized protein KIAA2012
24.5447	NaN	Q17R98;Q17R98-2;Q17R98-3	H0Y9K9;H0Y9M2;A0A5F9ZGW8;A0A590UJE4;Q17R98-3;Q17R98-2;G5E9Z1;A0A494C0H4;Q17R98	ZN827_HUMAN	ZNF827	Zinc finger protein 827
24.5484	23.4482	Q96AY2;Q96AY2-2	Q96AY2-2;Q96AY2	EME1_HUMAN	EME1	Crossover junction endonuclease EME1
24.5521	24.3803	Q4VC05-2	Q4VC05-2;Q4VC05	BCL7A_HUMAN	BCL7A	Isoform of Q4VC05, Isoform 2 of B-cell CLL/lymphoma 7 protein family member A
24.5526	20.7325	Q30201;Q30201-2;Q30201-5	Q30201-2;Q30201-5;Q30201-6;Q30201-7;Q30201-8;F8W7W8;Q30201	HFE_HUMAN	HFE	Hereditary hemochromatosis protein
24.5534	23.9038	Q765P7	Q765P7	MTSS2_HUMAN	MTSS2	Protein MTSS 2
24.5536	24.5436	Q8N488	Q8N488	RYBP_HUMAN	RYBP	RING1 and YY1-binding protein
24.5536	22.0998	P31323	P31323	KAP3_HUMAN	PRKAR2B	cAMP-dependent protein kinase type II-beta regulatory subunit
24.555	20.2425	A0A0S2Z471	A0A0S2Z471	A0A0S2Z471_HUMAN	CKB	Isoform of P12277, creatine kinase (Fragment)
24.5575	23.1322	O60318	O60318-2;O60318	GANP_HUMAN	MCM3AP	Germinal-center associated nuclear protein
24.5593	23.9963	H0Y5C6	H0Y5C6	H0Y5C6_HUMAN	FLNA	Isoform of P21333, Filamin A (Fragment)
24.5619	24.497	I6L8E2	I6L8E2	I6L8E2_HUMAN	MCIDAS	Isoform of D6RGH6, Multiciliate differentiation and DNA synthesis associated cell cycle protein
24.5681	25.7346	Q9HCE7;Q9HCE7-2	Q9HCE7-2;Q9HCE7	SMUF1_HUMAN	SMURF1	E3 ubiquitin-protein ligase SMURF1
24.5693	24.5919	Q96AE7	A0A075B7B2;Q96AE7-2;A0A994J3X0;Q96AE7	TTC17_HUMAN	TTC17	Tetratricopeptide repeat protein 17
24.5717	24.2866	Q9UBD5-2	Q9UBD5-2	ORC3_HUMAN	ORC3	Isoform of Q9UBD5, Isoform 2 of Origin recognition complex subunit 3
24.5739	22.3667	H0YBA1	A0A5H1ZRS1;E7EV93;A0A4W8VX11;H0YBA1;E9PGW9	H0YBA1_HUMAN	PCM1	Isoform of Q15154, Pericentriolar material 1
24.5754	24.4674	O75438;O75438-2	O75438-2;O75438	NDUB1_HUMAN	NDUFB1	NADH dehydrogenase [ubiquinone] 1 beta subcomplex subunit 1
24.5762	22.5239	O43255	Q8IUQ4-2;Q8IUQ4;O43255	SIAH2_HUMAN	SIAH2	E3 ubiquitin-protein ligase SIAH2
24.5766	21.3319	Q86WA8	H3BQ67;Q86WA8-2;E7EN44;Q86WA8	LONP2_HUMAN	LONP2	Lon protease homolog 2, peroxisomal
24.5777	24.1771	Q9UGC7	Q9UGC7-3;X6RKB4;Q9UGC7	RF1ML_HUMAN	MTRF1L	Peptide chain release factor 1-like, mitochondrial
24.5816	24.5344	Q96HQ2;Q96HQ2-2	Q96HQ2-2;Q96HQ2	C2AIL_HUMAN	CDKN2AIPNL	CDKN2AIP N-terminal-like protein
24.5818	24.1578	Q8N8R5	Q8N8R5	CB069_HUMAN	C2orf69	Mitochondrial protein C2orf69
24.5823	22.5808	Q8TCA0	A0A0A0MS58;X6RK58;Q8TCA0-2;Q8TCA0-3;Q8TCA0	LRC20_HUMAN	LRRC20	Leucine-rich repeat-containing protein 20
24.587	22.3164	Q8WVD5	E9PQV2;E9PLX2;Q8WVD5	RN141_HUMAN	RNF141	RING finger protein 141
24.589	23.7867	Q8IWE5;Q8IWE5-2	A0A2R8Y575;Q8IWE5-2;Q8IWE5	PKHM2_HUMAN	PLEKHM2	Pleckstrin homology domain-containing family M member 2
24.5942	21.8578	Q96T21;Q96T21-2;Q96T21-3	Q96T21-2;Q96T21-3;Q5HYY5;Q96T21	SEBP2_HUMAN	SECISBP2	Selenocysteine insertion sequence-binding protein 2
24.5949	22.36	Q96AP0;Q96AP0-2	R4GND4;R4GNJ5;R4GMR6;Q96AP0-2;A0A8Q3WLR8;A0A8Q3WM11;A0A8Q3WLT1;A0A8Q3WKU3;A0A8Q3WKP4;A0A8Q3WKP5;A0A8Q3SHZ0;A0A8Q3SI48;A0A8Q3SI54;A0A8Q3SHY1;A0A8Q3SHY4;A0A8Q3SI14;Q96AP0	ACD_HUMAN	ACD	Adrenocortical dysplasia protein homolog
24.598	29.1654	O94964;O94964-2	O94964-2;O94964-3;H0YDM2;O94964	SOGA1_HUMAN	SOGA1	Protein SOGA1
24.6022	24.003	Q8WXW3	A0A087WUI6;Q8WXW3	PIBF1_HUMAN	PIBF1	Progesterone-induced-blocking factor 1
24.6046	24.3707	Q9Y375	H0YNN4;H0YNB7;H0YL22;A0A7I2YQA4;A0A7I2V4I7;Q9Y375	CIA30_HUMAN	NDUFAF1	Complex I intermediate-associated protein 30, mitochondrial
24.6075	24.8925	O75865;O75865-2	O75865-2;O75865	TPC6A_HUMAN	TRAPPC6A	Trafficking protein particle complex subunit 6A
24.6077	28.0789	Q05682-3	E7EX44;Q05682-2;Q05682-3;Q05682-6	CALD1_HUMAN	CALD1	Isoform of Q05682, Isoform 3 of Caldesmon
24.6091	21.05	Q96BP2	Q96BP2	CHCH1_HUMAN	CHCHD1	Small ribosomal subunit protein mS37
24.6106	NaN	P24666-2	D3YTI2;P24666-2	PPAC_HUMAN	ACP1	Isoform of P24666, Isoform 2 of Low molecular weight phosphotyrosine protein phosphatase
24.6107	21.7591	Q32NB8	Q32NB8	PGPS1_HUMAN	PGS1	CDP-diacylglycerol--glycerol-3-phosphate 3-phosphatidyltransferase, mitochondrial
24.6109	25.3674	Q9BVG8;Q9BVG8-2;Q9BVG8-5;Q9BVG8-6	H3BTL6;B7Z896;Q9BVG8-2;Q9BVG8-5;Q9BVG8-6;F5H3M2;Q9BVG8	KIFC3_HUMAN	KIFC3	Kinesin-like protein KIFC3
24.6161	22.4118	O94966-3;O94966-4	E7ESU0;O94966-3;O94966-4;O94966-6;O94966-7;A0A8I5KV50	UBP19_HUMAN	USP19	Isoform of O94966, Isoform 3 of Ubiquitin carboxyl-terminal hydrolase 19
24.6169	24.6625	O00257	O00257	CBX4_HUMAN	CBX4	E3 SUMO-protein ligase CBX4
24.6179	24.4309	Q6PI78	A0A994J794;A0A994J4W9;A0A994J4P3;Q6PI78	TMM65_HUMAN	TMEM65	Transmembrane protein 65
24.619	23.1831	Q15572;Q15572-2;Q15572-6	Q15572-2;Q15572-4;Q15572-5;Q15572-6;H3BR71;Q15572	TAF1C_HUMAN	TAF1C	TATA box-binding protein-associated factor RNA polymerase I subunit C
24.6216	22.9009	O60512	O60512	B4GT3_HUMAN	B4GALT3	Beta-1,4-galactosyltransferase 3
24.6294	23.8311	Q9HC21;Q9HC21-2	Q9HC21-2;Q9HC21	TPC_HUMAN	SLC25A19	Mitochondrial thiamine pyrophosphate carrier
24.6351	24.1471	Q8N0Z8	J3KTG4;Q8N0Z8-2;Q8N0Z8	PUSL1_HUMAN	PUSL1	tRNA pseudouridine synthase-like 1
24.6368	25.1382	Q9C0B9	Q9C0B9-2;K7ESN2;A0A087WXC7;Q9C0B9	ZCHC2_HUMAN	ZCCHC2	Zinc finger CCHC domain-containing protein 2
24.638	24.7438	O60447;O60447-2	A0A804HIC4;O60447-2;O60447	EVI5_HUMAN	EVI5	Ecotropic viral integration site 5 protein homolog
24.6411	25.6767	Q9P086	Q9P086	MED11_HUMAN	MED11	Mediator of RNA polymerase II transcription subunit 11
24.6421	21.2189	Q969Q6	H0YJC5;Q969Q6-2;Q969Q6	P2R3C_HUMAN	PPP2R3C	Serine/threonine-protein phosphatase 2A regulatory subunit B'' subunit gamma
24.6426	22.904	O95870	A0A0G2JJD3;O95870-2;O95870	ABHGA_HUMAN	ABHD16A	Phosphatidylserine lipase ABHD16A
24.6437	20.8986	Q96QT4	H0YLN8;A0A0C4DGL2;Q96QT4	TRPM7_HUMAN	TRPM7	Transient receptor potential cation channel subfamily M member 7
24.6438	23.067	Q96QF0;Q96QF0-2;Q96QF0-3;Q96QF0-4;Q96QF0-8	Q96QF0-2;Q96QF0-3;Q96QF0-4;Q96QF0-5;Q96QF0-6;Q96QF0-7;Q96QF0-8;J3KPG1;H0YI02;Q96QF0	RAB3I_HUMAN	RAB3IP	Rab-3A-interacting protein
24.645	18.6469	Q92738;Q92738-2	X6RAB3;Q92738-2;Q92738	US6NL_HUMAN	USP6NL	USP6 N-terminal-like protein
24.6487	20.191	Q9Y5P8	A0A0G2JNR6;A0A0G2JN52;Q9Y5P8	P2R3B_HUMAN	PPP2R3B	Serine/threonine-protein phosphatase 2A regulatory subunit B'' subunit beta
24.6502	24.0649	Q8TE76;Q8TE76-3	Q8TE76-2;Q8TE76-3;Q8TE76	MORC4_HUMAN	MORC4	MORC family CW-type zinc finger protein 4
24.6508	23.7191	Q9P2N2;Q9P2N2-2;Q9P2N2-3;Q9P2N2-5	Q9P2N2-2;Q9P2N2-3;Q9P2N2-5;E9PMX7;J3QKM0;Q9P2N2	RHG28_HUMAN	ARHGAP28	Rho GTPase-activating protein 28
24.6514	24.8913	Q96BT7;Q96BT7-4	Q96BT7-4;Q96BT7	ALKB8_HUMAN	ALKBH8	Alkylated DNA repair protein alkB homolog 8
24.6515	24.3797	Q9NP80;Q9NP80-3	Q9NP80-3;A0A0C4DG51;Q9NP80	PLPL8_HUMAN	PNPLA8	Calcium-independent phospholipase A2-gamma
24.6517	28.0092	Q16720;Q16720-2;Q16720-3;Q16720-4;Q16720-5;Q16720-6;Q16720-7;Q16720-8	Q16720-2;Q16720-3;Q16720-4;Q16720-5;Q16720-6;Q16720-7;Q16720-8;A0A804HKZ0;A0A994J5M1;A0A994J581;Q16720	AT2B3_HUMAN	ATP2B3	Plasma membrane calcium-transporting ATPase 3
24.6533	22.4119	Q05DH4	Q05DH4	FHI1A_HUMAN	FHIP1A	FHF complex subunit HOOK-interacting protein 1A
24.6571	21.4202	P57764	G3V1A6;E9PIB2;P57764	GSDMD_HUMAN	GSDMD	Gasdermin-D
24.6613	26.7339	H0YD48;H0YE97;H0YEF7;H0YEH1;H0YEY8	H0YEF7;H0YEH1;H0YE97;H0YEY8;H0YD48	H0YD48_HUMAN;H0YE97_HUMAN;H0YEF7_HUMAN;H0YEH1_HUMAN;H0YEY8_HUMAN	PICALM	Isoform of Q13492, Phosphatidylinositol binding clathrin assembly protein (Fragment)
24.662	24.6522	Q6AZY7;Q6AZY7-2	Q6AZY7-2;Q6AZY7	SCAR3_HUMAN	SCARA3	Scavenger receptor class A member 3
24.6639	22.6864	Q99594	A0A1X7SBS4;A0A7P0SNI2;Q99594	TEAD3_HUMAN	TEAD3	Transcriptional enhancer factor TEF-5
24.6661	24.6471	Q86WC4	A0A0A0MSP4;A0A8V8TPT7;A0A8V8TQ80;A0A8V8TNX7;A0A8V8TNF7;A0A8V8TNK5;Q86WC4	OSTM1_HUMAN	OSTM1	Osteopetrosis-associated transmembrane protein 1
24.6664	24.0256	O00273-2	O00273-2	DFFA_HUMAN	DFFA	Isoform of O00273, Isoform DFF35 of DNA fragmentation factor subunit alpha
24.6686	23.4742	Q5VVJ2	A0A590UK32;A0A590UJW2;A0A590UJD8;A0A8V8TKW8;Q5VVJ2	MYSM1_HUMAN	MYSM1	Deubiquitinase MYSM1
24.6689	25.772	Q8TCC3;Q8TCC3-2;Q8TCC3-3	Q8TCC3-2;Q8TCC3-3;B8ZZV5;Q8TCC3	RM30_HUMAN	MRPL30	Large ribosomal subunit protein uL30m
24.6716	21.5451	Q9BTE0-2	Q9BTE0-2;J3KSE9;J3QLF4;J3QRL7;J3QRC3;J3QS35;J3QSG9	NAT9_HUMAN	NAT9	Isoform of Q9BTE0, Isoform 2 of Alpha/beta-tubulin-N-acetyltransferase 9
24.6721	25.1534	Q5H9L4;Q5H9L4-2	Q5H9L4-2;Q5H9L4-3;Q5H9L4	TAF7L_HUMAN	TAF7L	Transcription initiation factor TFIID subunit 7-like
24.673	22.393	Q8TCB7	Q8TCB7-2;H7C3H9;Q8TCB7	METL6_HUMAN	METTL6	tRNA N(3)-methylcytidine methyltransferase METTL6
24.6745	23.2935	P51817	O43930;P51817	PRKX_HUMAN	PRKX	cAMP-dependent protein kinase catalytic subunit PRKX
24.676	25.3538	P49795	P49795	RGS19_HUMAN	RGS19	Regulator of G-protein signaling 19
24.6768	22.446	P61812;P61812-2	P61812-2;P61812	TGFB2_HUMAN	TGFB2	Transforming growth factor beta-2 proprotein
24.6789	26.1683	O75394	O75394	RM33_HUMAN	MRPL33	Large ribosomal subunit protein bL33m
24.6813	24.5566	O60551	Q5VUC6;O60551	NMT2_HUMAN	NMT2	Glycylpeptide N-tetradecanoyltransferase 2
24.6831	24.3949	O00462	A0A2R8Y211;A0A2R8Y7A0;A0A2R8Y4U7;A0A2R8Y524;A0A2R8YEC9;A0A2R8YE79;A0A2R8YCE9;E9PFW2;O00462	MANBA_HUMAN	MANBA	Beta-mannosidase
24.6836	26.8328	Q92504	A2AAT0;A0A8V8TNV9;A0A8V8TM21;Q92504	S39A7_HUMAN	SLC39A7	Zinc transporter SLC39A7
24.6885	26.1565	P21589;P21589-2	P21589-2;H0Y7R7;P21589	5NTD_HUMAN	NT5E	5'-nucleotidase
24.6887	27.1513	P63313	P63313	TYB10_HUMAN	TMSB10	Thymosin beta-10
24.6889	24.8536	P48029	P48029-2;P48029-3;P48029-4;P48029	SC6A8_HUMAN	SLC6A8	Sodium- and chloride-dependent creatine transporter 1
24.689	23.9606	Q9Y2U9;Q9Y2U9-2	G3V3U8;G3V2H2;Q9Y2U9-2;Q9Y2U9	KLDC2_HUMAN	KLHDC2	Kelch domain-containing protein 2
24.6923	25.3542	Q96QD5;Q96QD5-2	Q96QD5-2;Q96QD5	DEPD7_HUMAN	DEPDC7	DEP domain-containing protein 7
24.6925	23.5752	P10636	P10636-9;A0A7I2PJZ2;P10636	TAU_HUMAN	MAPT	Microtubule-associated protein tau
24.6934	22.8689	Q15038-2	Q15038-2	DAZP2_HUMAN	DAZAP2	Isoform of Q15038, Isoform 2 of DAZ-associated protein 2
24.6962	22.4375	Q9NUN5;Q9NUN5-2;Q9NUN5-3;Q9NUN5-4	A0A3F2YP66;Q9NUN5-2;Q9NUN5-3;Q9NUN5-4;A0A3B3IRS7;A0A3B3IT31;A0A3B3ITP2;A0A3B3IU68;Q9NUN5	LMBD1_HUMAN	LMBRD1	Lysosomal cobalamin transport escort protein LMBD1
24.6967	21.0497	A0A087WZ13	A0A087WZ13	A0A087WZ13_HUMAN	RAVER1	Isoform of Q8IY67, Ribonucleoprotein, PTB binding 1
24.7008	24.7532	Q5T8D3-2;Q5T8D3-3	B7Z2R7;Q5T8E0;X6RDD7;Q5T8D3-2;Q5T8D3-3;A0A7I2YQD7;A0A7I2YQE9;A0A7I2YQJ9;A0A087X0B8;A0A7I2V2R8;A0A7I2V2M2;A0A7I2V2Y9;A0A7I2V347;A0A7I2V420;A0A7I2V462;A0A7I2V556;A0A7I2V560;A0A7I2V5E1;A0A7I2V5U2;A0A7I2V690;Q5T8D3	ACBD5_HUMAN	ACBD5	Isoform of Q5T8D3, Isoform 2 of Acyl-CoA-binding domain-containing protein 5
24.7022	24.4545	Q9Y2R4	Q9Y2R4	DDX52_HUMAN	DDX52	Probable ATP-dependent RNA helicase DDX52
24.7043	20.7048	P43353;P43353-2	P43353-2;P43353	AL3B1_HUMAN	ALDH3B1	Aldehyde dehydrogenase family 3 member B1
24.7056	25.7007	Q8N8U2	A0A0B4J291;Q8N8U2	CDYL2_HUMAN	CDYL2	Chromodomain Y-like protein 2
24.7076	23.3313	Q8TE77	Q8TE77-3;Q8TE77	SSH3_HUMAN	SSH3	Protein phosphatase Slingshot homolog 3
24.7082	25.7649	P56378	G3V556;A0A0A0MTQ5;P56378	ATP68_HUMAN	ATP5MJ	ATP synthase subunit ATP5MJ, mitochondrial
24.7101	27.3691	A0A2R8YE82	C9J6G3;C9J7M1;A0A2R8YE82;O95749	A0A2R8YE82_HUMAN	TBCE	Isoform of Q15813, Tubulin folding cofactor E
24.7106	25.6389	Q8WWI5;Q8WWI5-2;Q8WWI5-3	A0A8V8TN05;A0A8V8TN34;Q8WWI5-2;Q8WWI5-3;Q8WWI5	CTL1_HUMAN	SLC44A1	Choline transporter-like protein 1
24.7114	25.3285	Q92556	Q92556-2;Q92556-3;Q92556	ELMO1_HUMAN	ELMO1	Engulfment and cell motility protein 1
24.7121	22.8076	P23469;P23469-2;P23469-3	P23469-2;P23469-3;P23469	PTPRE_HUMAN	PTPRE	Receptor-type tyrosine-protein phosphatase epsilon
24.7146	24.2883	O95819	E7EX83;A0A0D9SEY1;O95819-2;O95819-3;O95819-4;O95819-5;H7C360;H7C0P6;E7EN19;E7ENQ1;O95819	M4K4_HUMAN	MAP4K4	Mitogen-activated protein kinase kinase kinase kinase 4
24.7157	22.6003	Q96KQ4	G3V5J1;A0A3B3ISJ2;Q96KQ4	ASPP1_HUMAN	PPP1R13B	Apoptosis-stimulating of p53 protein 1
24.7176	24.3578	Q9UIF8;Q9UIF8-2;Q9UIF8-3;Q9UIF8-4;Q9UIF8-5	Q9UIF8-2;Q9UIF8-3;Q9UIF8-4;Q9UIF8-5;Q9UIF8	BAZ2B_HUMAN	BAZ2B	Bromodomain adjacent to zinc finger domain protein 2B
24.7179	25.6811	Q8N5H3-1	Q8N5H3-4;Q8N5H3-1;Q8N5H3	LRA25_HUMAN	FAM89B	Isoform of Q8N5H3, Isoform 1 of Leucine repeat adapter protein 25
24.7185	25.013	M0QY01	M0QY01	M0QY01_HUMAN	EPS15L1	Isoform of Q9UBC2, Epidermal growth factor receptor pathway substrate 15 like 1 (Fragment)
24.7211	26.2593	O43491-4	H0Y5B0;O43491-4;E9PMG5;E9PK52;E9PHY5;A0A994J5B1	E41L2_HUMAN	EPB41L2	Isoform of O43491, Isoform 4 of Band 4.1-like protein 2
24.7215	24.3835	Q8N5I4	C9JB06;Q8N5I4	DHRSX_HUMAN	DHRSX	Dehydrogenase/reductase SDR family member on chromosome X
24.723	25.2326	P49281-2;P49281-3;P49281-5	A0A2R8YD71;F8W1P7;P49281-2;P49281-3;P49281-5	NRAM2_HUMAN	SLC11A2	Isoform of P49281, Isoform 1 of Natural resistance-associated macrophage protein 2
24.7248	22.469	A5PLL7;A5PLL7-2	A5PLL7-2;F8W924;I3L0A0;A5PLL7	PDES1_HUMAN	PEDS1	Plasmanylethanolamine desaturase 1
24.7277	22.4304	Q09028-2	Q09028-2	RBBP4_HUMAN	RBBP4	Isoform of Q09028, Isoform 2 of Histone-binding protein RBBP4
24.7282	23.306	Q92698	V9GYD3;Q92698	RAD54_HUMAN	RAD54L	DNA repair and recombination protein RAD54-like
24.729	21.0606	O60930	O60930	RNH1_HUMAN	RNASEH1	Ribonuclease H1
24.7308	20.8345	Q9H4B6	H0YJH0;H0YJ02;Q9H4B6	SAV1_HUMAN	SAV1	Protein salvador homolog 1
24.7316	24.9177	Q86UD0	Q86UD0	SAPC2_HUMAN	SAPCD2	Suppressor APC domain-containing protein 2
24.7329	21.7576	Q6ZN18;Q6ZN18-2;Q6ZN18-3	Q6ZN18-2;Q6ZN18-3;G5EA50;A0A669KBL4;A0A669KBC9;Q6ZN18	AEBP2_HUMAN	AEBP2	Zinc finger protein AEBP2
24.7362	24.2495	Q12800-2	Q12800-2;Q12800-4	TFCP2_HUMAN	TFCP2	Isoform of Q12800, Isoform 2 of Alpha-globin transcription factor CP2
24.7368	21.5346	Q5JTV8-2	J3KN66;Q5JTV8-2;Q5JTV8-3	TOIP1_HUMAN	TOR1AIP1	Isoform of Q5JTV8, Isoform 2 of Torsin-1A-interacting protein 1
24.737	25.7232	Q8TCU4	Q8TCU4-2;Q8TCU4-3;A0A804HJ69;A0A804HIB7;A0A804HJW3;A0A804HJA5;A0A804HL70;A0A804HKP4;A0A804HKC0;H7C1D9;A0A087WTU9;A0A087WV20;Q8TCU4	ALMS1_HUMAN	ALMS1	Centrosome-associated protein ALMS1
24.7486	21.8329	Q86WN1	Q86WN1-3;E5RGB1;E5RGT6;Q86WN1	FCSD1_HUMAN	FCHSD1	F-BAR and double SH3 domains protein 1
24.7499	22.502	Q9H9L4	H0YIQ8;H0YID1;F8VXI8;F8VX10;F8VUX5;Q9H9L4-4;Q9H9L4	KANL2_HUMAN	KANSL2	KAT8 regulatory NSL complex subunit 2
24.7524	22.5322	Q969K3;Q969K3-2	Q969K3-2;H7BYJ1;Q969K3	RNF34_HUMAN	RNF34	E3 ubiquitin-protein ligase RNF34
24.7531	21.4913	Q9UF56	A0A6E1XD66;Q9UF56	FXL17_HUMAN	FBXL17	F-box/LRR-repeat protein 17
24.7544	25.1364	O43524	O43524-2;O43524	FOXO3_HUMAN	FOXO3	Forkhead box protein O3
24.7576	23.5991	P22692;P22692-2	P22692-2;P22692	IBP4_HUMAN	IGFBP4	Insulin-like growth factor-binding protein 4
24.7581	22.1858	Q8WUH1;Q8WUH1-1	H0YID9;B7Z3N2;Q8WUH1-1;B4DL54;Q8WUH1	CHUR_HUMAN	CHURC1	Protein Churchill
24.7615	25.1398	Q9Y6G3	J3KPP0;S4R2Z7;S4R360;Q9Y6G3	RM42_HUMAN	MRPL42	Large ribosomal subunit protein mL42
24.765	20.9652	Q9NQV6;Q9NQV6-1;Q9NQV6-2;Q9NQV6-4;Q9NQV6-5;Q9NQV6-6;Q9NQV6-7	E9PLV1;Q9NQV6-1;Q9NQV6-2;Q9NQV6-4;Q9NQV6-5;Q9NQV6-6;Q9NQV6-7;Q9NQV6	PRD10_HUMAN	PRDM10	PR domain zinc finger protein 10
24.7668	24.0134	Q13506	H0Y4C5;B8ZZS2;Q13506-2;Q13506	NAB1_HUMAN	NAB1	NGFI-A-binding protein 1
24.7698	24.9554	Q8IW41;Q8IW41-2	Q8IW41-2;F8VRP2;R4GN33;Q8IW41	MAPK5_HUMAN	MAPKAPK5	MAP kinase-activated protein kinase 5
24.7698	24.0932	Q9UDW1	Q9UDW1-2;Q9UDW1	QCR9_HUMAN	UQCR10	Cytochrome b-c1 complex subunit 9
24.77	23.6706	Q96C92;Q96C92-2;Q96C92-3;Q96C92-4	Q96C92-2;Q96C92-3;Q96C92-4;H7C331;Q96C92	ENTR1_HUMAN	ENTR1	Endosome-associated-trafficking regulator 1
24.7705	24.7608	Q03112;Q03112-1;Q03112-3;Q03112-5	E7EUL6;A0A0C3SFZ7;Q03112-1;Q03112-3;Q03112-4;Q03112-5;Q03112-6;Q03112-8;Q03112	MECOM_HUMAN	MECOM	Histone-lysine N-methyltransferase MECOM
24.7747	24.1539	Q8NBA8	Q8NBA8-2;D6REE2;Q8NBA8	DTWD2_HUMAN	DTWD2	tRNA-uridine aminocarboxypropyltransferase 2
24.7752	23.7595	Q5BKX5	Q5BKX5-3;Q5BKX5	ACTMP_HUMAN	ACTMAP	Actin maturation protease
24.7758	25.8881	Q9H799;Q9H799-5	H0YA77;H0Y9I8;Q9H799-5;A0A494BZW6;Q9H799	CPLN1_HUMAN	CPLANE1	Ciliogenesis and planar polarity effector 1
24.778	24.9022	Q4KMQ2;Q4KMQ2-2;Q4KMQ2-3	A0A7P0T8Y2;A0A7P0TAW4;A0A7P0TBC5;A0A7P0TBD5;A0A7P0TBI1;A0A7P0TAF4;Q4KMQ2-2;Q4KMQ2-3;Q4KMQ2-4;Q4KMQ2	ANO6_HUMAN	ANO6	Anoctamin-6
24.779	25.1827	P33908	P33908-2;P33908	MA1A1_HUMAN	MAN1A1	Mannosyl-oligosaccharide 1,2-alpha-mannosidase IA
24.7795	23.9347	O94986;O94986-3	O94986-1;O94986-2;O94986-3;O94986	CE152_HUMAN	CEP152	Centrosomal protein of 152 kDa
24.7812	21.9897	Q9BYM8	Q9BYM8-3;Q9BYM8-4;B4DML5;H0Y4S7;A0A8V8TMZ2;A0A8V8TMQ4;G3XAG9;Q9BYM8	HOIL1_HUMAN	RBCK1	RanBP-type and C3HC4-type zinc finger-containing protein 1
24.7825	23.4094	Q8N2K1;Q8N2K1-2;Q8N2K1-3	A6NGS0;D6RD90;Q8N2K1-2;Q8N2K1-3;B1AMF0;Q8N2K1	UB2J2_HUMAN	UBE2J2	Ubiquitin-conjugating enzyme E2 J2
24.7829	21.6577	Q2KHR2;Q2KHR2-3	Q2KHR2-2;Q2KHR2-3;H0YLX2;A0A8C8UYX0;Q2KHR2	RFX7_HUMAN	RFX7	DNA-binding protein RFX7
24.7841	22.8256	P54756;P54756-2;P54756-3	P54764-2;B7ZKW7;B7ZKJ3;C9JXA2;F8W9W0;F8VP57;P54756-2;P54756-3;E9PG71;P54764;P29320;P54756	EPHA5_HUMAN	EPHA5	Ephrin type-A receptor 5
24.7853	25.3696	Q96ED9;Q96ED9-2	Q96ED9-2;Q96ED9	HOOK2_HUMAN	HOOK2	Protein Hook homolog 2
24.7856	24.3984	Q9BRV8	Q9BRV8-2;Q9BRV8	SIKE1_HUMAN	SIKE1	Suppressor of IKBKE 1
24.7863	26.3596	E9PN89	E9PN89	E9PN89_HUMAN	HSPA8	Isoform of P11142, Heat shock protein family A (Hsp70) member 8 (Fragment)
24.789	21.9444	Q8N4Z0	Q8N4Z0	RAB42_HUMAN	RAB42	Ras-related protein Rab-42
24.7909	22.5323	Q8N5V2;Q8N5V2-3	Q8N5V2-3;Q8N5V2	NGEF_HUMAN	NGEF	Ephexin-1
24.7911	24.3706	A9IYQ1	A9IYQ1	A9IYQ1_HUMAN	PDS5B	Isoform of Q9NTI5, PDS5 cohesin associated factor B (Fragment)
24.7919	24.0308	Q8IYH5;Q8IYH5-2	Q8IYH5-2;Q8IYH5-4;Q8IYH5	ZZZ3_HUMAN	ZZZ3	ZZ-type zinc finger-containing protein 3
24.793	23.4442	Q9H9Y2	Q9H9Y2	RPF1_HUMAN	RPF1	Ribosome production factor 1
24.7949	24.1421	Q86TW2;Q86TW2-2	F8W9Q8;G3V426;G3V3J2;Q86TW2-2;Q86TW2-3;Q86TW2	ADCK1_HUMAN	ADCK1	AarF domain-containing protein kinase 1
24.7951	25.2691	O95563	Q5R3B4;O95563	MPC2_HUMAN	MPC2	Mitochondrial pyruvate carrier 2
24.7964	22.3459	A8MT69	J3QR01;A8MT69	CENPX_HUMAN	CENPX	Centromere protein X
24.7971	26.8079	Q9BSC4;Q9BSC4-2;Q9BSC4-4	Q9BSC4-2;Q9BSC4-4;A0A8Q3SIR1;A0A8Q3SHT1;A0A8Q3SHT6;A0A8Q3SHW5;A0A8Q3SHX7;Q9BSC4	NOL10_HUMAN	NOL10	Nucleolar protein 10
24.7983	24.1347	Q9NZJ9-2	Q9NZJ9-2;Q9NZJ9-3;A0A024RBG1	NUDT4_HUMAN	NUDT4	Isoform of Q9NZJ9, Isoform 2 of Diphosphoinositol polyphosphate phosphohydrolase 2
24.804	25.4002	Q9H3E2	Q9H3E2-2;H0Y9R5;A0A494C0S0;Q9H3E2	SNX25_HUMAN	SNX25	Sorting nexin-25
24.8046	24.5009	Q9BV94;Q9BV94-2	Q9BV94-2;Q9BV94	EDEM2_HUMAN	EDEM2	ER degradation-enhancing alpha-mannosidase-like protein 2
24.8085	20.6089	Q7Z460-4	Q7Z460-4;A0A8V8TRF6	CLAP1_HUMAN	CLASP1	Isoform of Q7Z460, Isoform 4 of CLIP-associating protein 1
24.8089	25.0544	Q8WVX9	E9PPB8;Q8WVX9	FACR1_HUMAN	FAR1	Fatty acyl-CoA reductase 1
24.8096	22.3198	Q9NQC8;Q9NQC8-2	A0A5F9ZH13;Q9NQC8-2;E9PRT0;E9PSB9;E9PR06;Q9NQC8	IFT46_HUMAN	IFT46	Intraflagellar transport protein 46 homolog
24.8135	25.2092	Q96DT7	Q96DT7-2;Q96DT7-3;Q96DT7-4;Q96DT7	ZBT10_HUMAN	ZBTB10	Zinc finger and BTB domain-containing protein 10
24.8155	21.9204	Q12955	Q12955-4;Q12955-6;Q12955-7;Q12955-5;H0Y9E9;A0A087WTF3;A0A087WZ65;Q12955	ANK3_HUMAN	ANK3	Ankyrin-3
24.8159	24.1409	Q96ER9	Q96ER9-2;C9JSW8;Q96ER9	MITOK_HUMAN	CCDC51	Mitochondrial potassium channel
24.8164	23.2982	Q6DKK2	Q6DKK2	TTC19_HUMAN	TTC19	Tetratricopeptide repeat protein 19, mitochondrial
24.8202	25.0615	P15954	D6R9Z7;P15954	COX7C_HUMAN	COX7C	Cytochrome c oxidase subunit 7C, mitochondrial
24.8202	22.8794	Q96N64;Q96N64-2;Q96N64-3	Q96N64-2;Q96N64-3;Q96N64	PWP2A_HUMAN	PWWP2A	PWWP domain-containing protein 2A
24.821	22.1144	O43542	G3V399;G3V3H9;O43542	XRCC3_HUMAN	XRCC3	DNA repair protein XRCC3
24.8225	24.4766	Q9UHQ1;Q9UHQ1-2;Q9UHQ1-3	J3KRH7;J3KS48;J3KT43;J3KTP5;Q9UHQ1-2;Q9UHQ1-3;E7EP87;E9PH27;Q9UHQ1	NARF_HUMAN	NARF	Nuclear prelamin A recognition factor
24.8301	25.1802	P55042	J3KRG9;J3KSM6;P55042	RAD_HUMAN	RRAD	GTP-binding protein RAD
24.8304	24.6379	Q8N697	B6ZDF2;H7BYB7;Q8N697	S15A4_HUMAN	SLC15A4	Solute carrier family 15 member 4
24.8308	24.2525	P17010;P17010-2;P17010-3	E9PEP7;P08048-2;P08048-3;P17010-2;P17010-3;P08048;P17010	ZFX_HUMAN	ZFX	Zinc finger X-chromosomal protein
24.8324	25.8279	P49069	A0A7I2V377;A0A7I2V518;P49069	CAMLG_HUMAN	CAMLG	Guided entry of tail-anchored proteins factor CAMLG
24.8333	20.6388	Q9ULI4	C9JFF0;A0A8V8TM02;Q9ULI4	KI26A_HUMAN	KIF26A	Kinesin-like protein KIF26A
24.8355	24.0735	Q7LGA3	A0A8I5QKN0;A0A8I5KW95;Q7LGA3-2;Q7LGA3	HS2ST_HUMAN	HS2ST1	Heparan sulfate 2-O-sulfotransferase 1
24.8379	24.9363	P25963	G3V3I4;G3V2A2;A0A8V8TLC3;P25963	IKBA_HUMAN	NFKBIA	NF-kappa-B inhibitor alpha
24.8416	24.4734	O00635	O00635	TRI38_HUMAN	TRIM38	E3 ubiquitin-protein ligase TRIM38
24.8434	NaN	I6L899	I6L899	GOG8R_HUMAN	GOLGA8R	Golgin subfamily A member 8R
24.8434	22.4657	A0A804F6T5;A0A804F729;A0A8V8TNX9	A0A8V8TNX9;A0A804F6T5;A0A804F729	A0A804F6T5_HUMAN;A0A804F729_HUMAN;A0A8V8TNX9_HUMAN	PKM	Isoform of P14618, Pyruvate kinase
24.8438	22.9775	P50225	H3BRY5;E9PKW4;E9PM76;E9PKR8;P50225;P50226	ST1A1_HUMAN	SULT1A1	Sulfotransferase 1A1
24.8439	23.3333	Q6XUX3;Q6XUX3-2	Q6XUX3-2;Q6XUX3-4;Q6XUX3	DUSTY_HUMAN	DSTYK	Dual serine/threonine and tyrosine protein kinase
24.8448	23.7993	Q11201	E5RHV6;Q11201	SIA4A_HUMAN	ST3GAL1	CMP-N-acetylneuraminate-beta-galactosamide-alpha-2,3-sialyltransferase 1
24.8484	25.7985	O95139	A0A087WZX2;O95139	NDUB6_HUMAN	NDUFB6	NADH dehydrogenase [ubiquinone] 1 beta subcomplex subunit 6
24.8498	25.0116	Q5SW79-2	H0Y4T4;Q5SW79-2	CE170_HUMAN	CEP170	Isoform of Q5SW79, Isoform 2 of Centrosomal protein of 170 kDa
24.8515	24.8526	Q9H159;Q9H159-2	J3KTP3;F8VVI9;Q9H159-2;Q9H159	CAD19_HUMAN	CDH19	Cadherin-19
24.8546	23.1564	Q96HA8;Q96HA8-2	Q96HA8-2;E5RIY9;Q96HA8	NTAQ1_HUMAN	NTAQ1	Protein N-terminal glutamine amidohydrolase
24.8564	25.0571	Q9NVR7;Q9NVR7-2	C9J4M0;Q9NVR7-2;C9JUE9;Q9NVR7	TBCC1_HUMAN	TBCCD1	TBCC domain-containing protein 1
24.8587	26.5369	Q684P5;Q684P5-2;Q684P5-3	A0A1B0GV05;Q684P5-2;Q684P5-3;A0A8V8TL16;A0A8V8TKZ8;Q684P5	RPGP2_HUMAN	RAP1GAP2	Rap1 GTPase-activating protein 2
24.8595	25.6817	Q96PV6;Q96PV6-1	C9JMY0;A0A0G2JNN3;Q96PV6-1;A0A087WUE4;Q96PV6	LENG8_HUMAN	LENG8	Leukocyte receptor cluster member 8
24.8608	23.8267	Q5JSL3	A6NIW2;Q5JSL3	DOC11_HUMAN	DOCK11	Dedicator of cytokinesis protein 11
24.8688	26.4949	Q6ICG6;Q6ICG6-2;Q6ICG6-3	B0QY16;Q6ICG6-2;Q6ICG6-3;Q6ICG6	K0930_HUMAN	KIAA0930	Uncharacterized protein KIAA0930
24.869	22.6143	Q9H8X2	X6R9A6;Q9H8X2	IPPK_HUMAN	IPPK	Inositol-pentakisphosphate 2-kinase
24.869	19.5592	O60783	O60783	RT14_HUMAN	MRPS14	Small ribosomal subunit protein uS14m
24.8691	24.6514	O15403	O15403	MOT7_HUMAN	SLC16A6	Monocarboxylate transporter 7
24.8707	25.0206	Q9BXU9;Q9BXU9-1	A0A0A0MSB7;Q9BXU9-1;Q9BXU9	CABP8_HUMAN	CALN1	Calcium-binding protein 8
24.8782	22.7253	Q14061	C9J8T6;Q14061	COX17_HUMAN	COX17	Cytochrome c oxidase copper chaperone
24.8828	22.8377	P54802	P54802	ANAG_HUMAN	NAGLU	Alpha-N-acetylglucosaminidase
24.884	21.9884	Q14CN4;Q14CN4-2;Q14CN4-3;Q3SY84;Q7RTS7	Q14CN4-2;Q14CN4-3;F8W1S1;Q3SY84;Q14CN4;Q7RTS7	K2C71_HUMAN;K2C72_HUMAN;K2C74_HUMAN	KRT71;KRT72;KRT74	Keratin, type II cytoskeletal 72
24.8892	24.935	O95405	O95405-3;O95405-2;O95405	ZFYV9_HUMAN	ZFYVE9	Zinc finger FYVE domain-containing protein 9
24.8919	24.6198	Q9UKA4	Q9UKA4	AKA11_HUMAN	AKAP11	A-kinase anchor protein 11
24.893	24.1916	P09493-6	P09493-4;P09493-6;A0A0S2Z4G6;H0YKJ4;H0YK48;A0A494C0I0;P09493-10;A0A994J554;P09493	TPM1_HUMAN	TPM1	Isoform of P09493, Isoform 6 of Tropomyosin alpha-1 chain
24.8938	25.2113	Q5T7N3-2	Q5T7N3-2	KANK4_HUMAN	KANK4	Isoform of Q5T7N3, Isoform 2 of KN motif and ankyrin repeat domain-containing protein 4
24.8942	20.9249	Q96FT9	Q96FT9-2;A0A7I2V6B2;Q96FT9	IFT43_HUMAN	IFT43	Intraflagellar transport protein 43 homolog
24.8968	26.0592	Q86WT1	Q86WT1	IT70A_HUMAN	IFT70A	Intraflagellar transport protein 70A
24.9048	24.6104	Q15545	Q15545	TAF7_HUMAN	TAF7	Transcription initiation factor TFIID subunit 7
24.9072	26.5658	P84101;P84101-4	P84101-4;P84101	SERF2_HUMAN	SERF2	Small EDRK-rich factor 2
24.9078	24.0526	P10070	P10070-1;P10070-2;P10070-3;P10070-4;A0A7I2PJA1;P10070	GLI2_HUMAN	GLI2	Zinc finger protein GLI2
24.9106	24.0151	Q7L1W4	Q7L1W4	LRC8D_HUMAN	LRRC8D	Volume-regulated anion channel subunit LRRC8D
24.9107	22.3155	Q6MZW2;Q6MZW2-2	Q6MZW2-2;Q6MZW2-3;Q6MZW2	FSTL4_HUMAN	FSTL4	Follistatin-related protein 4
24.9113	25.5591	Q8TEQ0;Q8TEQ0-2	H3BPI1;Q8TEQ0-2;A0A0C4DGM3;Q8TEQ0	SNX29_HUMAN	SNX29	Sorting nexin-29
24.9135	23.3625	P52306-4	P52306-4	GDS1_HUMAN	RAP1GDS1	Isoform of P52306, Isoform 4 of Rap1 GTPase-GDP dissociation stimulator 1
24.9154	26.7961	Q149N8;Q149N8-4	Q149N8-2;Q149N8-4;Q149N8-5;A0A0D9SFM0;H7C2W2;Q149N8	SHPRH_HUMAN	SHPRH	E3 ubiquitin-protein ligase SHPRH
24.9167	19.1919	H7C0N4	H7C561;H7C0N4	H7C0N4_HUMAN	SF1	Isoform of Q15637, Splicing factor 1 (Fragment)
24.9173	24.8083	Q9NPR9	M0R3H4;M0R2E1;M0QZW9;G5E9L6;Q9NPR9	GP108_HUMAN	GPR108	Protein GPR108
24.9185	23.0268	Q8IW19	F8WET0;E9PRH6;Q8IW19	APLF_HUMAN	APLF	Aprataxin and PNK-like factor
24.9216	24.6845	Q9UHI8	A0A7I2YQL5;E5RI60;A0A7I2V400;A0A7I2V5J1;Q9UHI8	ATS1_HUMAN	ADAMTS1	A disintegrin and metalloproteinase with thrombospondin motifs 1
24.9232	24.9261	Q6UW56;Q6UW56-3	Q6UW56-2;Q6UW56-3;C9JA62;Q6UW56	ARAID_HUMAN	ATRAID	All-trans retinoic acid-induced differentiation factor
24.9254	26.0998	P15056	A0A2U3TZI2;P15056	BRAF_HUMAN	BRAF	Serine/threonine-protein kinase B-raf
24.9284	25.3602	Q9BZF9;Q9BZF9-2	H0YN48;H0YMI1;H0YNH8;Q9BZF9-2;F5H2B9;Q9BZF9	UACA_HUMAN	UACA	Uveal autoantigen with coiled-coil domains and ankyrin repeats
24.9309	24.5872	P0C7T5	P0C7T5	ATX1L_HUMAN	ATXN1L	Ataxin-1-like
24.9313	23.719	Q6P3S6	Q6P3S6	FBX42_HUMAN	FBXO42	F-box only protein 42
24.9313	24.8922	P62834	P62834	RAP1A_HUMAN	RAP1A	Ras-related protein Rap-1A
24.932	24.2534	Q8TCX1;Q8TCX1-2	Q8TCX1-2;Q8TCX1-3;H7BYC8;Q8TCX1	DC2L1_HUMAN	DYNC2LI1	Cytoplasmic dynein 2 light intermediate chain 1
24.9331	NaN	Q3KRA9;Q3KRA9-2;Q3KRA9-3	Q3KRA9-2;Q3KRA9-3;H0YEC4;H0YEM5;H0YD83;E9PI76;Q3KRA9	ALKB6_HUMAN	ALKBH6	Alpha-ketoglutarate-dependent dioxygenase alkB homolog 6
24.9339	25.0728	Q86XN7;Q86XN7-2	Q5JS36;Q86XN7-2;Q86XN7	PRSR1_HUMAN	PROSER1	Proline and serine-rich protein 1
24.9355	25.4935	O75144;O75144-2;O75144-3	A0A2R8Y5W7;K4DIA0;B7Z1W8;A0A8V8TQV9;A0A8V8TQW2;A0A8V8TQ42;O75144-2;O75144-3;O75144	ICOSL_HUMAN	ICOSLG	ICOS ligand
24.938	23.9827	Q9UIJ5	Q9UIJ5	ZDHC2_HUMAN	ZDHHC2	Palmitoyltransferase ZDHHC2
24.9388	23.7435	Q9H7Z6;Q9H7Z6-2	Q9H7Z6-2;Q9H7Z6	KAT8_HUMAN	KAT8	Histone acetyltransferase KAT8
24.9389	24.4675	Q9HAU4	J3QQM4;Q9HAU4	SMUF2_HUMAN	SMURF2	E3 ubiquitin-protein ligase SMURF2
24.9406	23.9868	Q9NTW7-4;Q9NTW7-5;Q9NTW7-6	Q9NTW7-4;Q9NTW7-5;Q9NTW7-6	ZF64B_HUMAN	ZFP64	Isoform of Q9NTW7, Isoform 6 of Zinc finger protein 64
24.9457	26.0519	Q9Y4E1-3	J3KP36;Q9Y4E1-4;Q9Y4E1-5;Q9Y4E1-6;Q9Y4E1-1;Q9Y4E1-2;Q9Y4E1-3;Q9Y4E1	WAC2C_HUMAN	WASHC2C	Isoform of Q9Y4E1, Isoform 4 of WASH complex subunit 2C
24.946	23.0388	Q9BZ67;Q9BZ67-2	E9PS62;Q9BZ67-2;Q9BZ68;Q9BZ67	FRMD8_HUMAN	FRMD8	FERM domain-containing protein 8
24.9461	25.6691	Q9UBT6	Q9UBT6-8;Q9UBT6	POLK_HUMAN	POLK	DNA polymerase kappa
24.9467	24.5322	Q9NUU6	Q9NUU6	OTULL_HUMAN	OTULINL	Inactive ubiquitin thioesterase OTULINL
24.947	22.4777	Q08554;Q08554-2	Q08554-2;Q08554	DSC1_HUMAN	DSC1	Desmocollin-1
24.9475	23.2314	Q7Z4N8	H0YCC3;Q7Z4N8	P4HA3_HUMAN	P4HA3	Prolyl 4-hydroxylase subunit alpha-3
24.9497	25.4038	Q9UNL4;Q9UNL4-2;Q9UNL4-3;Q9UNL4-4;Q9UNL4-5;Q9UNL4-6;Q9UNL4-7;Q9UNL4-8	A0A1B0GW41;Q9UNL4-8;Q9UNL4-2;Q9UNL4-3;Q9UNL4-4;Q9UNL4-5;Q9UNL4-6;Q9UNL4-7;E9PEN0;Q8WYH8-2;Q8WYH8;Q9UNL4	ING4_HUMAN	ING4	Inhibitor of growth protein 4
24.9513	25.1667	P57060	P57060	RWD2B_HUMAN	RWDD2B	RWD domain-containing protein 2B
24.9514	25.8762	Q04900;Q04900-3;Q04900-4	Q04900-3;Q04900-4;D6R9B4;Q04900	MUC24_HUMAN	CD164	Sialomucin core protein 24
24.9551	25.3153	P53007	F6WWZ8;P53007	TXTP_HUMAN	SLC25A1	Tricarboxylate transport protein, mitochondrial
24.9558	24.3506	Q14CS0	Q14CS0	UBX2B_HUMAN	UBXN2B	UBX domain-containing protein 2B
24.96	21.463	Q9BWG6;Q9BWG6-2	Q9BWG6-2;Q9BWG6	SCNM1_HUMAN	SCNM1	Sodium channel modifier 1
24.9601	25.045	Q9UG56;Q9UG56-2	H0Y7P7;B1AKM6;B1AKM8;Q9UG56-2;Q9UG56	PISD_HUMAN	PISD	Phosphatidylserine decarboxylase proenzyme, mitochondrial
24.9643	24.833	Q9C037;Q9C037-2	H7C0Q6;Q9C037-2;Q9C037-3;Q9C037	TRIM4_HUMAN	TRIM4	E3 ubiquitin-protein ligase TRIM4
24.9652	25.5458	O43741	O43741-2;O43741	AAKB2_HUMAN	PRKAB2	5'-AMP-activated protein kinase subunit beta-2
24.9671	23.5251	A6NI28	E9PJK4;A6NI28	RHG42_HUMAN	ARHGAP42	Rho GTPase-activating protein 42
24.968	23.8859	Q969R5	H0Y5M2;Q969R5-2;Q969R5-3;Q969R5	LMBL2_HUMAN	L3MBTL2	Lethal(3)malignant brain tumor-like protein 2
24.9704	23.594	O00750	F5GWN5;O00750	P3C2B_HUMAN	PIK3C2B	Phosphatidylinositol 4-phosphate 3-kinase C2 domain-containing subunit beta
24.9718	27.3188	Q9UL16;Q9UL16-2	Q9UL16-2;Q9UL16	CFA45_HUMAN	CFAP45	Cilia- and flagella-associated protein 45
24.9744	24.3177	Q9H0X4	Q9H0X4-2;B4DGG1;Q9H0X4	F234A_HUMAN	FAM234A	Protein FAM234A
24.9752	21.4118	Q9Y2G3	H7C4W6;Q9Y2G3	AT11B_HUMAN	ATP11B	Phospholipid-transporting ATPase IF
24.9754	23.624	P53367	P53367	ARFP1_HUMAN	ARFIP1	Arfaptin-1
24.9785	24.5637	O60476	O60476	MA1A2_HUMAN	MAN1A2	Mannosyl-oligosaccharide 1,2-alpha-mannosidase IB
24.9801	26.0443	A0A087WVM4;B7ZM99;H0Y327	B7ZM99;H0Y327;A0A087WVM4	A0A087WVM4_HUMAN;B7ZM99_HUMAN;H0Y327_HUMAN	MTHFD1L	Isoform of Q6UB35, formate--tetrahydrofolate ligase
24.9819	22.4715	P21675;P21675-10;P21675-11;P21675-12;P21675-2;P21675-3;P21675-4;P21675-5;P21675-6;P21675-7;P21675-8;P21675-9	P21675-10;P21675-11;P21675-12;A0A804HHS0;A0A804HIY8;A0A804HIC2;A0A804HK58;P21675-2;P21675-3;P21675-4;P21675-5;P21675-6;P21675-7;P21675-8;P21675-9;Q8IZX4;P21675	TAF1_HUMAN	TAF1	Transcription initiation factor TFIID subunit 1
24.9846	27.1627	O75629	A0A3B3IRL2;O75629	CREG1_HUMAN	CREG1	Protein CREG1
24.9847	25.688	F5GZQ4	F5GZQ4	F5GZQ4_HUMAN	LDHA	Isoform of P00338, Lactate dehydrogenase A (Fragment)
24.986	25.68	O95182	M0R0N0;O95182	NDUA7_HUMAN	NDUFA7	NADH dehydrogenase [ubiquinone] 1 alpha subcomplex subunit 7
24.9874	25.6585	P78536	P78536-2;A0A8V8TPV7;A0A8V8TNK7;A0A8V8TN27;P78536	ADA17_HUMAN	ADAM17	Disintegrin and metalloproteinase domain-containing protein 17
24.9882	24.8297	Q9BS16	D6RJF0;D6RHD3;Q9BS16	CENPK_HUMAN	CENPK	Centromere protein K
24.989	25.4124	Q9BUB7	Q9BUB7-2;Q9BUB7	TMM70_HUMAN	TMEM70	Transmembrane protein 70, mitochondrial
24.9914	24.5296	P05452	E9PHK0;P05452	TETN_HUMAN	CLEC3B	Tetranectin
24.9934	24.2497	Q9UKT7	C9J0Y7;Q9UKT7	FBXL3_HUMAN	FBXL3	F-box/LRR-repeat protein 3
24.9948	23.3654	Q9HBM6	Q9HBM6	TAF9B_HUMAN	TAF9B	Transcription initiation factor TFIID subunit 9B
24.9956	NaN	Q5VST9;Q5VST9-2;Q5VST9-3;Q5VST9-5;Q5VST9-6	A6NGQ3;Q5VST9-2;Q5VST9-3;Q5VST9-5;Q5VST9-6;A0A590UJ10;A0A0A0MRI8;A0A7P0Z489;Q5VST9	OBSCN_HUMAN	OBSCN	Obscurin
24.9966	23.1872	Q4U2R6	Q4U2R6	RM51_HUMAN	MRPL51	Large ribosomal subunit protein mL51
25.0003	26.3449	Q6UWP7;Q6UWP7-3	Q6UWP7-2;Q6UWP7-3;C9K0C3;Q6UWP7	LCLT1_HUMAN	LCLAT1	Lysocardiolipin acyltransferase 1
25.0033	24.584	O43303;O43303-2	O43303-2;O43303	CP110_HUMAN	CCP110	Centriolar coiled-coil protein of 110 kDa
25.0045	26.423	Q9Y5C1	Q9Y5C1	ANGL3_HUMAN	ANGPTL3	Angiopoietin-related protein 3
25.0058	25.7711	Q16134	B4DEQ0;Q16134-3;A0A804HI70;A0A804HI73;A0A804HI80;A0A804HI48;A0A804HK05;A0A804HJK8;A0A804HL81;Q16134	ETFD_HUMAN	ETFDH	Electron transfer flavoprotein-ubiquinone oxidoreductase, mitochondrial
25.0064	24.666	Q9NXK8;Q9NXK8-2	Q9NXK8-2;Q9NXK8	FXL12_HUMAN	FBXL12	F-box/LRR-repeat protein 12
25.0068	25.0194	A0A5F9YFS9	A0A5F9YFS9	A0A5F9YFS9_HUMAN	SPCS1	Isoform of Q9Y6A9, Signal peptidase complex subunit 1
25.0087	23.8313	Q9UHB6-5	Q9UHB6-4;Q9UHB6-5	LIMA1_HUMAN	LIMA1	Isoform of Q9UHB6, Isoform 5 of LIM domain and actin-binding protein 1
25.0095	25.6959	Q6PI98	Q6PI98-4;K7EIY8;M0R3E2;Q6PI98	IN80C_HUMAN	INO80C	INO80 complex subunit C
25.0096	25.6353	Q16526;Q49AN0;Q49AN0-2	A0A0D2X7Z3;Q49AN0-2;Q16526;Q49AN0	CRY1_HUMAN;CRY2_HUMAN	CRY1;CRY2	Cryptochrome-1
25.0105	23.2904	P52848;P52848-3	P52848-3;P52848	NDST1_HUMAN	NDST1	Bifunctional heparan sulfate N-deacetylase/N-sulfotransferase 1
25.0144	23.4957	Q9H1C3	Q9H1C3	GL8D2_HUMAN	GLT8D2	Glycosyltransferase 8 domain-containing protein 2
25.0146	24.789	P38571;P38571-2	Q5T073;A0A0A0MT32;P38571-2;P38571	LICH_HUMAN	LIPA	Lysosomal acid lipase/cholesteryl ester hydrolase
25.0162	23.967	Q96LT7	A0A2R8Y5U5;A0A2R8Y5K2;A0A5F9ZHW7;Q96LT7	CI072_HUMAN	C9orf72	Guanine nucleotide exchange factor C9orf72
25.0171	24.4423	P04424;P04424-2;P04424-3	A0A5F9ZHM8;A0A5F9ZHC6;P04424-2;P04424-3;P04424	ARLY_HUMAN	ASL	Argininosuccinate lyase
25.0182	20.233	Q9HBX9;Q9HBX9-2;Q9HBX9-5	Q9HBX9-2;Q9HBX9-5;E9PCA3;B4DGP2;A0A0A0MT52;A0A087WWV0;Q9HBX9	RXFP1_HUMAN	RXFP1	Relaxin receptor 1
25.0196	22.3459	Q6IN84	Q6IN84-2;A0A087WZC1;Q6IN84	MRM1_HUMAN	MRM1	rRNA methyltransferase 1, mitochondrial
25.0232	23.4093	Q9BSJ5;Q9BSJ5-3	Q9BSJ5-2;Q9BSJ5-3;I3L072;Q9BSJ5	CQ080_HUMAN	C17orf80	Uncharacterized protein C17orf80
25.0235	23.5426	Q15776	Q15776	ZKSC8_HUMAN	ZKSCAN8	Zinc finger protein with KRAB and SCAN domains 8
25.0241	23.9443	A0A3B3IRW6	A0A3B3IRW6	A0A3B3IRW6_HUMAN	QSER1	Isoform of Q2KHR3, Glutamine and serine rich 1
25.0263	25.3099	Q14190;Q14190-2	H7BZX8;Q14190-2;Q14190	SIM2_HUMAN	SIM2	Single-minded homolog 2
25.0266	26.029	Q92766;Q92766-2	Q92766-2;Q92766-4;Q92766	RREB1_HUMAN	RREB1	Ras-responsive element-binding protein 1
25.0281	23.8183	Q8N9N5;Q8N9N5-2;Q8N9N5-3;Q8N9N5-4;Q8N9N5-5;Q8N9N5-6;Q8N9N5-7	B4DE54;A0A804HKG3;Q8N9N5-2;Q8N9N5-3;Q8N9N5-4;Q8N9N5-5;Q8N9N5-6;Q8N9N5-7;Q8N9N5	BANP_HUMAN	BANP	Protein BANP
25.0286	23.2788	Q96IQ9-2	Q96IQ9-2;M0R0Q5;M0R398	ZN414_HUMAN	ZNF414	Isoform of Q96IQ9, Isoform 2 of Zinc finger protein 414
25.03	25.6865	O95402	O95402	MED26_HUMAN	MED26	Mediator of RNA polymerase II transcription subunit 26
25.0343	23.4607	Q8TAA9;Q8TAA9-2	Q8TAA9-2;Q8TAA9	VANG1_HUMAN	VANGL1	Vang-like protein 1
25.0376	24.8468	Q15274	Q15274	NADC_HUMAN	QPRT	Nicotinate-nucleotide pyrophosphorylase [carboxylating]
25.0376	26.7555	O15391	O15391	TYY2_HUMAN	YY2	Transcription factor YY2
25.0378	24.7355	P78312-2;P78312-5;P78312-6	E7EUR8;A0A1B0GVL4;P78312-2;P78312-4;P78312-5;P78312-6;P78312	F193A_HUMAN	FAM193A	Isoform of P78312, Isoform 2 of Protein FAM193A
25.0389	24.7516	Q16539-2	Q16539-2	MK14_HUMAN	MAPK14	Isoform of Q16539, Isoform CSBP1 of Mitogen-activated protein kinase 14
25.0395	26.6578	Q9HAF1;Q9HAF1-2;Q9HAF1-3;Q9HAF1-4	B1AK63;Q9HAF1-2;Q9HAF1-3;Q9HAF1-4;Q9HAF1	EAF6_HUMAN	MEAF6	Chromatin modification-related protein MEAF6
25.0399	23.7509	Q9NYI0;Q9NYI0-2	Q9NYI0-2;E5RJ29;Q9NYI0	PSD3_HUMAN	PSD3	PH and SEC7 domain-containing protein 3
25.0404	23.0778	Q9NWW7	Q9NWW7	CB042_HUMAN	C2orf42	Uncharacterized protein C2orf42
25.0435	24.45	A0A8V8TMN4;H0Y9S9;K7ENU7	H0Y9S9;A0A8V8TMN4;K7ENU7	A0A8V8TMN4_HUMAN;H0Y9S9_HUMAN;K7ENU7_HUMAN	PPIP5K2	Isoform of O43314, Inositol hexakisphosphate and diphosphoinositol-pentakisphosphate kinase
25.0449	25.4538	Q15800	D6REA2;D6RDP9;D6R952;Q15800	MSMO1_HUMAN	MSMO1	Methylsterol monooxygenase 1
25.0462	24.0436	Q9H867	Q9H867-1;Q9H867-3;Q9H867-5;Q9H867	MT21D_HUMAN	VCPKMT	Protein N-lysine methyltransferase METTL21D
25.0465	25.5315	Q9UH99;Q9UH99-2	B0QY60;B0QY66;B0QY68;B0QY67;A0A8I5QKM0;Q9UH99-2;Q9UH99-3;Q9UH99	SUN2_HUMAN	SUN2	SUN domain-containing protein 2
25.048	22.6144	O43482	H0YKL4;O43482	MS18B_HUMAN	OIP5	Protein Mis18-beta
25.0494	21.6053	Q9HAP2	Q9HAP2-2;Q9HAP2-4;F5H0V4;Q9HAP2	MLXIP_HUMAN	MLXIP	MLX-interacting protein
25.0516	23.3076	Q92870;Q92870-4	H0YAJ5;H0Y9U9;G5E9Y1;Q92870-2;Q92870-4;Q92870	APBB2_HUMAN	APBB2	Amyloid beta precursor protein binding family B member 2
25.0527	24.704	Q9H6U8;Q9H6U8-3	H0YCW6;Q9H6U8-2;Q9H6U8-3;Q9H6U8-4;A0A087WZ62;Q9H6U8	ALG9_HUMAN	ALG9	Alpha-1,2-mannosyltransferase ALG9
25.0554	23.851	O00329	B7ZM44;F8W9P4;A0A8V8TNW9;A0A8V8TM62;A0A8V8TMM0;O00329	PK3CD_HUMAN	PIK3CD	Phosphatidylinositol 4,5-bisphosphate 3-kinase catalytic subunit delta isoform
25.0567	24.1255	Q5TGY1;Q5TGY1-2	Q5TGY1-2;A0A075B6H3;Q5TGY1	TMCO4_HUMAN	TMCO4	Transmembrane and coiled-coil domain-containing protein 4
25.0568	25.1114	Q8IYR2	I3L428;Q8IYR2	SMYD4_HUMAN	SMYD4	SET and MYND domain-containing protein 4
25.0568	24.5198	Q86XK3;Q86XK3-2	Q86XK3-2;Q86XK3-3;Q86XK3	SFR1_HUMAN	SFR1	Swi5-dependent recombination DNA repair protein 1 homolog
25.058	24.6061	Q8N6L1;Q8N6L1-2	Q8N6L1-2;A0A6I8PLD9;A0A6I8PRU6;Q8N6L1	KTAP2_HUMAN	KRTCAP2	Keratinocyte-associated protein 2
25.0584	24.5646	A0A2R8Y5V9;A0A2R8YHD2	A0A2R8Y5V9;A0A2R8YHD2	A0A2R8Y5V9_HUMAN;A0A2R8YHD2_HUMAN	TPM4	Isoform of P67936, Tropomyosin 4
25.059	23.0583	Q9NUA8	F8WAI8;Q9NUA8	ZBT40_HUMAN	ZBTB40	Zinc finger and BTB domain-containing protein 40
25.0596	23.2648	P48553	P48553	TPC10_HUMAN	TRAPPC10	Trafficking protein particle complex subunit 10
25.0615	24.2752	Q9H9Q4	Q9H9Q4-2;C9JWV4;G5E9Q8;H7C0G7;A0A8V8TMZ4;Q9H9Q4	NHEJ1_HUMAN	NHEJ1	Non-homologous end-joining factor 1
25.0642	22.3906	H7BY16	H7BY16	H7BY16_HUMAN	NCL	Isoform of P19338, Nucleolin
25.067	22.417	P11137;P11137-3	A0A024R3Z1;P11137-2;P11137-3;P11137-4;A0A669KB77;P11137	MTAP2_HUMAN	MAP2	Microtubule-associated protein 2
25.0696	23.223	O75063	O75063	XYLK_HUMAN	FAM20B	Glycosaminoglycan xylosylkinase
25.0708	24.6206	E7EQT4	E7EQT4	E7EQT4_HUMAN	ACIN1	Isoform of Q9UKV3, Apoptotic chromatin condensation inducer 1
25.0751	23.9603	Q9UI43	Q9UI43	MRM2_HUMAN	MRM2	rRNA methyltransferase 2, mitochondrial
25.0753	21.7164	Q14592;Q14592-2	Q14592-2;Q14592	ZN460_HUMAN	ZNF460	Zinc finger protein 460
25.0753	24.3047	Q7Z5W3	Q7Z5W3	BN3D2_HUMAN	BCDIN3D	RNA 5'-monophosphate methyltransferase
25.0767	21.9136	Q9NXH8	Q9NXH8	TOR4A_HUMAN	TOR4A	Torsin-4A
25.0792	20.6762	P05305	P05305	EDN1_HUMAN	EDN1	Endothelin-1
25.0793	26.2961	Q86WA6;Q86WA6-2	Q49AI2;B4DML3;Q86WA6-2;Q86WA6	BPHL_HUMAN	BPHL	Valacyclovir hydrolase
25.0799	26.7123	Q99698	Q99698-2;Q99698-3;A0A8V8TKT6;A0A8V8TL83;Q99698	LYST_HUMAN	LYST	Lysosomal-trafficking regulator
25.0811	25.5648	O60513	C9J3R8;E7ETS9;O60513	B4GT4_HUMAN	B4GALT4	Beta-1,4-galactosyltransferase 4
25.0823	24.6261	P61952	P63211;P61952	GBG11_HUMAN	GNG11	Guanine nucleotide-binding protein G(I)/G(S)/G(O) subunit gamma-11
25.0862	24.4288	Q15649	A0A087WY54;Q15649	ZNHI3_HUMAN	ZNHIT3	Zinc finger HIT domain-containing protein 3
25.0869	24.2511	O75385	O75385	ULK1_HUMAN	ULK1	Serine/threonine-protein kinase ULK1
25.0883	23.1097	P02458;P02458-1	P02458-1;P02458-3;P02458	CO2A1_HUMAN	COL2A1	Collagen alpha-1(II) chain
25.0902	22.1133	Q15629;Q15629-2	Q15629-2;G3XAN4;Q15629	TRAM1_HUMAN	TRAM1	Translocating chain-associated membrane protein 1
25.0906	25.6569	Q13495;Q13495-4	A0A8C8KAR0;A0A804HJ96;A0A804HJD4;Q13495-4;Q13495	MAMD1_HUMAN	MAMLD1	Mastermind-like domain-containing protein 1
25.0911	26.493	O15318	A0A7I2R591;D6RJH6;D6RIT0;D6R9U7;O15318	RPC7_HUMAN	POLR3G	DNA-directed RNA polymerase III subunit RPC7
25.0921	25.3395	O60292	A0A6Q8PFQ0;A0A6Q8PH54;O43166-2;O43166-3;F5GYF8;O60292;Q9P2F8;O43166	SI1L3_HUMAN	SIPA1L3	Signal-induced proliferation-associated 1-like protein 3
25.0937	26.8239	P49116	C9JKS0;P49116-2;P49116	NR2C2_HUMAN	NR2C2	Nuclear receptor subfamily 2 group C member 2
25.094	26.0271	Q9Y385	Q9Y385	UB2J1_HUMAN	UBE2J1	Ubiquitin-conjugating enzyme E2 J1
25.0961	25.7136	Q9Y546	A6NL66;E7EP35;Q9Y546	LRC42_HUMAN	LRRC42	Leucine-rich repeat-containing protein 42
25.0962	22.9408	Q6UB28	Q6UB28	MAP12_HUMAN	METAP1D	Methionine aminopeptidase 1D, mitochondrial
25.0969	21.8763	Q9NVP2	K7ELW9;Q9NVP2	ASF1B_HUMAN	ASF1B	Histone chaperone ASF1B
25.0985	24.0421	Q9NRR4;Q9NRR4-2;Q9NRR4-4	Q9NRR4-2;Q9NRR4-4;Q9NRR4	RNC_HUMAN	DROSHA	Ribonuclease 3
25.0988	25.014	Q5JU69;Q5JU69-2;Q8N2E6	Q5JU69-2;Q8N2E6;Q5JU69	TOR2A_HUMAN;TOR2X_HUMAN	TOR2A	Torsin-2A
25.0996	23.7425	Q9ULV3;Q9ULV3-5	F6VD24;H0Y5D5;Q5SYW2;Q9ULV3-2;Q9ULV3-3;Q9ULV3-4;Q9ULV3-5;A0A494C0L7;F5H2X7;Q9ULV3	CIZ1_HUMAN	CIZ1	Cip1-interacting zinc finger protein
25.1006	23.7054	Q5VUM1	Q5VUM1	SDHF4_HUMAN	SDHAF4	Succinate dehydrogenase assembly factor 4, mitochondrial
25.1039	25.0187	Q8TAV0;Q8TAV0-3	Q8TAV0-3;E9PQL1;Q8TAV0	FA76A_HUMAN	FAM76A	Protein FAM76A
25.1054	20.2627	Q96K19-3	Q96K19-2;Q96K19-3;Q96K19-5;E9PP55;Q96K19	RN170_HUMAN	RNF170	Isoform of Q96K19, Isoform 3 of E3 ubiquitin-protein ligase RNF170
25.1059	25.7848	Q9UBX3;Q9UBX3-2	F6RGN5;Q9UBX3-2;Q9UBX3	DIC_HUMAN	SLC25A10	Mitochondrial dicarboxylate carrier
25.1111	23.4796	Q92844	E7EVA2;E7EW82;E7EV32;E7EQA9;H7C3L4;E7EMT6;E7ENY2;Q92844	TANK_HUMAN	TANK	TRAF family member-associated NF-kappa-B activator
25.1111	24.4924	Q96ME7;Q96ME7-2;Q96ME7-3	Q96ME7-2;Q96ME7-3;G3XAG1;Q96ME7	ZN512_HUMAN	ZNF512	Zinc finger protein 512
25.1142	22.1594	Q76L83;Q76L83-2	Q76L83-2;E7EWD6;A0A5F9ZH08;A0A5F9ZHN2;Q76L83	ASXL2_HUMAN	ASXL2	Putative Polycomb group protein ASXL2
25.1147	24.5134	P56277	P56277	CMC4_HUMAN	CMC4	Cx9C motif-containing protein 4
25.1174	23.8913	Q96EZ8	Q96EZ8-2;Q96EZ8-3;Q96EZ8-4;F8W126;Q96EZ8	MCRS1_HUMAN	MCRS1	Microspherule protein 1
25.1196	25.6407	P84157-2	P84157-2;Q6ZR64;K7EQX8	MXRA7_HUMAN	MXRA7	Isoform of P84157, Isoform 2 of Matrix-remodeling-associated protein 7
25.1204	26.3133	Q9NQ89	Q9NQ89	CL004_HUMAN	C12orf4	Protein C12orf4
25.1211	21.1784	Q8N8S7	A0A8Q3WLE0;Q8N8S7	ENAH_HUMAN	ENAH	Protein enabled homolog
25.1217	23.9761	Q9HD40;Q9HD40-3	A0A7P0TA23;A0A7P0Z4P3;Q9HD40-3;Q9HD40	SPCS_HUMAN	SEPSECS	O-phosphoseryl-tRNA(Sec) selenium transferase
25.1225	25.7068	Q92564;Q92564-3	Q92564-2;Q92564-3;D6RB33;D6RDV8;Q92564	DCNL4_HUMAN	DCUN1D4	DCN1-like protein 4
25.1232	24.2459	P01031	A0A8Q3SID6;P01031	CO5_HUMAN	C5	Complement C5
25.1242	22.4498	Q8N0U4	Q8N0U4-3;Q8N0U4	F185A_HUMAN	FAM185A	Protein FAM185A
25.1245	23.1607	Q6PGN9;Q6PGN9-2	Q6PGN9-2;Q6PGN9-4;Q6PGN9	PSRC1_HUMAN	PSRC1	Proline/serine-rich coiled-coil protein 1
25.1252	22.0763	P49810;P49810-3	P49810-2;P49810-3;B1AP22;A0A7I2YQG9;E5RHT1;A0A7I2V355;A0A7I2V3R9;A0A7I2V3Y8;A0A7I2V4D0;A0A7I2V4T4;A0A7I2V551;A0A7I2V4Y6;A0A7I2V5L1;A0A7I2V5Q3;A0A7I2V5S6;A0A7I2V5Y0;P49810	PSN2_HUMAN	PSEN2	Presenilin-2
25.1315	25.3499	P52630;P52630-4	A0A494C164;A0A8V8TLG8;A0A8V8TLJ4;P52630-4;P52630	STAT2_HUMAN	STAT2	Signal transducer and activator of transcription 2
25.1318	25.6999	Q6PII3	A0A0B4J1R8;Q6PII3	CC174_HUMAN	CCDC174	Coiled-coil domain-containing protein 174
25.136	23.0609	Q9H0U6	Q9H0U6	RM18_HUMAN	MRPL18	Large ribosomal subunit protein uL18m
25.1399	24.1314	P05231	B4DNV3;B5MC21;B5MC14;B5MCZ3;A0A8Q3SJL1;P05231	IL6_HUMAN	IL6	Interleukin-6
25.1435	21.6745	Q96AH0;Q96AH0-3	Q96AH0-3;Q96AH0	SOSB2_HUMAN	NABP1	SOSS complex subunit B2
25.1435	23.1595	Q5M775-3	Q5M775-2;Q5M775-3;A0A7I2V5G2	CYTSB_HUMAN	SPECC1	Isoform of Q5M775, Isoform 3 of Cytospin-B
25.1452	24.0867	Q6P4Q7	Q6P4Q7	CNNM4_HUMAN	CNNM4	Metal transporter CNNM4
25.1469	22.4721	Q6UXD5;Q6UXD5-2;Q6UXD5-3;Q6UXD5-5;Q6UXD5-6	H3BN26;A0A087WYL5;Q6UXD5-5;Q6UXD5-6;Q6UXD5-2;Q6UXD5-3;Q6UXD5	SE6L2_HUMAN	SEZ6L2	Seizure 6-like protein 2
25.1496	26.2611	P69891	E9PBW4;A0A2R8Y7X9;P69891;P02100;P69892	HBG1_HUMAN	HBG1	Hemoglobin subunit gamma-1
25.1505	26.2086	O94900	O94900	TOX_HUMAN	TOX	Thymocyte selection-associated high mobility group box protein TOX
25.1532	22.3533	Q15034	H0Y8G9;Q15034	HERC3_HUMAN	HERC3	Probable E3 ubiquitin-protein ligase HERC3
25.1556	23.1248	P21953	P21953-2;P21953	ODBB_HUMAN	BCKDHB	2-oxoisovalerate dehydrogenase subunit beta, mitochondrial
25.1589	21.6281	Q9H469	X6RJB2;X6RHD7;X6RGT4;A0A0C4DFV0;Q9H469	FXL15_HUMAN	FBXL15	F-box/LRR-repeat protein 15
25.1639	26.3154	Q9UKD1	Q5JTV1;Q9UKD1	GMEB2_HUMAN	GMEB2	Glucocorticoid modulatory element-binding protein 2
25.164	26.0778	Q15532;Q15532-2	J3KRP6;J3KT22;J3KT74;Q15532-2;B4DLD3;J3QLJ7;J3QQX5;J3QQW2;J3QQW6;J3QQM2;J3QS72;J3QSG1;J3QSB3;X6R3J2;Q15532	SSXT_HUMAN	SS18	Protein SSXT
25.1665	25.3086	Q9UM82	Q9UM82	SPAT2_HUMAN	SPATA2	Spermatogenesis-associated protein 2
25.17	26.23	Q5HYJ3	Q5HYJ3-2;Q5HYJ3-3;F5GX09;Q5HYJ3	FA76B_HUMAN	FAM76B	Protein FAM76B
25.1713	23.7647	Q9Y2V0	A0A2R8Y7J6;Q9Y2V0-2;A0A2R8YD89;A0A2R8YEZ2;H3BS01;H3BNF9;Q9Y2V0	CDIN1_HUMAN	CDIN1	CDAN1-interacting nuclease 1
25.1716	25.6577	Q8NHG7	Q8NHG7	SVIP_HUMAN	SVIP	Small VCP/p97-interacting protein
25.1749	24.6467	O14647;O14647-2	A0A1B0GTU9;A0A0D9SEU0;A0A0D9SF92;O14647-2;O14647	CHD2_HUMAN	CHD2	Chromodomain-helicase-DNA-binding protein 2
25.175	24.9013	P43405;P43405-2	P43405-2;P43405	KSYK_HUMAN	SYK	Tyrosine-protein kinase SYK
25.1796	25.3277	Q9NWZ8	Q9NWZ8	GEMI8_HUMAN	GEMIN8	Gem-associated protein 8
25.1799	23.212	Q9H4B0;Q9H4B0-2;Q9H4B0-3	E7EVL7;Q9H4B0-3;Q9H4B0-2;E5RIL9;Q9H4B0	OSGL1_HUMAN	OSGEPL1	tRNA N6-adenosine threonylcarbamoyltransferase, mitochondrial
25.1806	25.6154	Q9UNA1;Q9UNA1-2	Q9UNA1-2;Q9UNA1	RHG26_HUMAN	ARHGAP26	Rho GTPase-activating protein 26
25.1825	25.3657	Q56NI9	E5RIE3;E5RFE4;E5RFP7;Q56NI9	ESCO2_HUMAN	ESCO2	N-acetyltransferase ESCO2
25.1861	19.9373	Q86TI0;Q86TI0-2	C9JIE2;A0A8V8TNS9;Q86TI0-2;Q86TI0	TBCD1_HUMAN	TBC1D1	TBC1 domain family member 1
25.1868	25.8709	Q7RTR2;Q7RTR2-2;Q7RTR2-4	H3BLT9;Q7RTR2-2;Q7RTR2-4;A0A087WZ24;Q7RTR2	NLRC3_HUMAN	NLRC3	NLR family CARD domain-containing protein 3
25.1881	21.9222	Q6P1R3;Q6P1R3-3	B4E1M0;A0A6I8PS01;E9PPE2;Q6P1R3-3;Q6P1R3	MSD2_HUMAN	MSANTD2	Myb/SANT-like DNA-binding domain-containing protein 2
25.1983	24.5115	Q5VST6	Q5VST6-2;Q5VST6	AB17B_HUMAN	ABHD17B	Alpha/beta hydrolase domain-containing protein 17B
25.1993	25.7476	Q11206;Q11206-2;Q11206-3;Q11206-4;Q11206-5;Q11206-6;Q11206-7	A0A7P0RGI5;E9PPJ6;E9PQZ2;Q11206-2;Q11206-3;Q11206-4;Q11206-5;Q11206-6;Q11206-7;A0A7I2V2H5;A0A7I2V4F4;A0A7I2V4V4;A0A7I2V4R4;A0A7I2V5F3;Q11206	SIA4C_HUMAN	ST3GAL4	CMP-N-acetylneuraminate-beta-galactosamide-alpha-2,3-sialyltransferase 4
25.2	25.8301	Q14157;Q14157-5	F8W726;H0Y5H6;H7C2T8;Q14157-3;Q14157-5;Q14157	UBP2L_HUMAN	UBAP2L	Ubiquitin-associated protein 2-like
25.2009	25.4494	Q9H204	H0YAA8;Q9H204	MED28_HUMAN	MED28	Mediator of RNA polymerase II transcription subunit 28
25.2041	25.717	Q8N5F7	A0A494C050;Q5M9Q1;Q8N5F7	NKAP_HUMAN	NKAP	NF-kappa-B-activating protein
25.2062	21.2456	P22466	P22466	GALA_HUMAN	GAL	Galanin peptides
25.2066	23.8676	Q8NFZ0;Q8NFZ0-2	F6UZG9;Q8NFZ0-2;Q8NFZ0	FBH1_HUMAN	FBH1	F-box DNA helicase 1
25.208	25.5058	Q96F44;Q96F44-3	Q96F44-2;Q96F44-3;Q96F44	TRI11_HUMAN	TRIM11	E3 ubiquitin-protein ligase TRIM11
25.2089	26.3441	Q96A26	F8W7Q4;E9PH05;A0A8I5KUL7;Q96A26	F162A_HUMAN	FAM162A	Protein FAM162A
25.2148	21.9024	Q9UPS6;Q9UPS6-2	Q9UPS6-2;O15047;Q9UPS6	SET1B_HUMAN	SETD1B	Histone-lysine N-methyltransferase SETD1B
25.2168	24.7919	Q9NTW7-2	Q9NTW7-2	ZF64B_HUMAN	ZFP64	Isoform of Q9NTW7, Isoform 4 of Zinc finger protein 64
25.2171	25.0381	O95848	O95848	NUD14_HUMAN	NUDT14	Uridine diphosphate glucose pyrophosphatase NUDT14
25.2186	22.8313	Q6ZPD9	K7ELH8;Q6ZPD9	D19L3_HUMAN	DPY19L3	Probable C-mannosyltransferase DPY19L3
25.2209	24.3058	Q8TB36	A0A6Q8PFG4;A0A6Q8PGL3;A0A6Q8PH97;A0A6Q8PGU0;A0A6Q8PH88;A0A6Q8PGQ9;A0A6Q8PH79;A0A6Q8PGS2;A0A6Q8PEX8;A0A6Q8PEZ4;A0A6Q8PHN7;A0A6Q8PHC1;A0A7I2RYU0;B4DIH2;Q8TB36-2;Q8TB36	GDAP1_HUMAN	GDAP1	Ganglioside-induced differentiation-associated protein 1
25.2212	25.3868	Q9NNX1;Q9NNX1-2;Q9NNX1-3	Q9NNX1-2;Q9NNX1-3;A6PVU8;Q9NNX1	TUFT1_HUMAN	TUFT1	Tuftelin
25.2241	24.8396	Q9Y4F3;Q9Y4F3-3;Q9Y4F3-4;Q9Y4F3-5	G8JLP4;F8VVB8;Q9Y4F3-3;Q9Y4F3-4;Q9Y4F3-5;Q9Y4F3	MARF1_HUMAN	MARF1	Meiosis regulator and mRNA stability factor 1
25.2284	24.6455	Q8TEY7;Q8TEY7-2	Q8TEY7-2;Q8TEY7-3;E9PQP0;E9PP47;E9PLK7;Q8TEY7	UBP33_HUMAN	USP33	Ubiquitin carboxyl-terminal hydrolase 33
25.2284	24.3064	P50579-2	F8VQZ7;P50579-2	MAP2_HUMAN	METAP2	Isoform of P50579, Isoform 2 of Methionine aminopeptidase 2
25.2288	23.6928	P09923	P05187;P09923	PPBI_HUMAN	ALPI	Intestinal-type alkaline phosphatase
25.2295	24.3794	Q16514;Q16514-2	A0A8I5QKX2;Q16514-2;A0A804HLG9;A0A8I5KU09;A0A8I5KTB6;A0A8I5KYW6;Q16514	TAF12_HUMAN	TAF12	Transcription initiation factor TFIID subunit 12
25.2312	24.0458	Q9HAH1	A0A0C4DGQ3;Q9HAH1	ZN556_HUMAN	ZNF556	Zinc finger protein 556
25.2326	21.6787	Q9Y5L2	Q9Y5L2	HLPDA_HUMAN	HILPDA	Hypoxia-inducible lipid droplet-associated protein
25.2329	24.6749	Q9NW75	Q9NW75	GPTC2_HUMAN	GPATCH2	G patch domain-containing protein 2
25.2338	26.3413	Q5TZA2	Q5TZA2	CROCC_HUMAN	CROCC	Rootletin
25.2339	25.0249	Q12913;Q12913-3	A0A8V8TP51;Q12913-3;Q12913	PTPRJ_HUMAN	PTPRJ	Receptor-type tyrosine-protein phosphatase eta
25.2362	24.8354	P05412	P05412	JUN_HUMAN	JUN	Transcription factor Jun
25.2367	23.3158	Q9HAV0	A0A6Q8PFE0;A0A6Q8PFW8;A0A6Q8PG88;A0A6Q8PFV8;A0A7I2S2S9;H7C5J5;Q9HAV0	GBB4_HUMAN	GNB4	Guanine nucleotide-binding protein subunit beta-4
25.2383	27.3224	Q8TA86	C9J6V2;A0A804HI79;Q8TA86	RP9_HUMAN	RP9	Retinitis pigmentosa 9 protein
25.2405	25.2211	Q99618	F8WDL1;F5GX58;Q99618	CDCA3_HUMAN	CDCA3	Cell division cycle-associated protein 3
25.244	24.5972	P51957;P51957-2	E7EX48;P51957-2;P51957-3;P51957	NEK4_HUMAN	NEK4	Serine/threonine-protein kinase Nek4
25.2455	25.4613	Q969R8	Q969R8	ITFG2_HUMAN	ITFG2	KICSTOR complex protein ITFG2
25.2465	23.8389	Q6DN90;Q6DN90-2;Q6DN90-3	A0A2R8Y7T6;Q6DN90-2;Q6DN90-3;A0A3B3IRZ4;A0A3B3IU98;A0A0C4DGT3;Q6DN90	IQEC1_HUMAN	IQSEC1	IQ motif and SEC7 domain-containing protein 1
25.2475	25.2119	P25445;P25445-6	Q59FU8;P25445-6;A0A8Q3WLI5;A0A8Q3WLK1;A0A8Q3WLK6;A0A8Q3WLL4;A0A8Q3SIR6;A0A8Q3SJI5;P25445	TNR6_HUMAN	FAS	Tumor necrosis factor receptor superfamily member 6
25.2509	23.6368	Q9H3F6	F5H6V0;F5H497;Q9H3F6	BACD3_HUMAN	KCTD10	BTB/POZ domain-containing adapter for CUL3-mediated RhoA degradation protein 3
25.2533	25.948	P05155;P05155-2;P05155-3	E9PGN7;A0A087WUD9;P05155-2;P05155-3;A0A7I2V2D2;H9KV48;A0A7I2V5R3;P05155	IC1_HUMAN	SERPING1	Plasma protease C1 inhibitor
25.2542	25.5146	Q75QN2;Q75QN2-2	J3KNV5;H0YBQ1;Q75QN2-2;E5RIN8;E5RJF0;E5RJL5;E5RG48;Q75QN2	INT8_HUMAN	INTS8	Integrator complex subunit 8
25.2568	24.9879	P00488	Q9NQP5;A6PVK5;P00488	F13A_HUMAN	F13A1	Coagulation factor XIII A chain
25.2568	26.9189	Q9NT68;Q9NT68-2	F8VNQ3;G3V106;Q9NT68-2;A0A8Q3SIB5;A0A8Q3SIA3;A0A8Q3SI97;Q9NT68	TEN2_HUMAN	TENM2	Teneurin-2
25.2569	24.1352	Q96E22	Q96E22	NGBR_HUMAN	NUS1	Dehydrodolichyl diphosphate synthase complex subunit NUS1
25.2577	25.6971	Q9ULJ7	Q9ULJ7-2;Q9ULJ7	ANR50_HUMAN	ANKRD50	Ankyrin repeat domain-containing protein 50
25.2599	22.7546	F8VR69	F8VR69	F8VR69_HUMAN	RPL6	Isoform of Q02878, 60S ribosomal protein L6 (Fragment)
25.2613	26.1375	P02461;P02461-2	P02461-2;P02461	CO3A1_HUMAN	COL3A1	Collagen alpha-1(III) chain
25.2614	22.595	Q5T481	Q5T481	RBM20_HUMAN	RBM20	RNA-binding protein 20
25.2671	25.2943	Q96GX2	Q96GX2	A7L3B_HUMAN	ATXN7L3B	Ataxin-7-like protein 3B
25.2752	24.6388	O14874;O14874-2;O14874-3	H3BTL2;H3BS02;O14874-2;O14874-3;O14874	BCKD_HUMAN	BCKDK	[3-methyl-2-oxobutanoate dehydrogenase [lipoamide]] kinase, mitochondrial
25.2755	23.1204	Q96SQ9;Q96SQ9-2	M0R152;Q96SQ9-2;Q96SQ9	CP2S1_HUMAN	CYP2S1	Cytochrome P450 2S1
25.2765	24.3797	Q96HP0	K7ESB7;Q96HP0	DOCK6_HUMAN	DOCK6	Dedicator of cytokinesis protein 6
25.2771	26.204	O75943;O75943-2	H0Y9J8;O75943-2;O75943-3;O75943-4;A0A0G2JP78;A0A0G2JPT5;A0A0G2JNH5;O75943	RAD17_HUMAN	RAD17	Cell cycle checkpoint protein RAD17
25.2772	25.3039	P55201;P55201-2;P55201-3;P55201-4	P55201-2;P55201-3;P55201-4;A0A804HI52;A0A804HIN1;A0A5F9ZH11;A0A8C8KWW5;A0A804HL48;A0A804HKY8;A0A804HL99;P55201	BRPF1_HUMAN	BRPF1	Peregrin
25.2815	25.7745	Q12968	H3BRS1;H3BR83;Q12968-2;Q12968-3;Q12968-4;Q12968-5;Q12968-6;I3L3K7;Q12968	NFAC3_HUMAN	NFATC3	Nuclear factor of activated T-cells, cytoplasmic 3
25.2836	23.3786	Q8IY57;Q8IY57-5	Q8IY57-3;Q8IY57-5;Q8IY57	YAF2_HUMAN	YAF2	YY1-associated factor 2
25.2842	25.5161	Q96QE3	A0A075B754;Q96QE3-2;Q96QE3	ATAD5_HUMAN	ATAD5	ATPase family AAA domain-containing protein 5
25.2855	27.5229	Q8NC54	Q8NC54	KCT2_HUMAN	KCT2	Keratinocyte-associated transmembrane protein 2
25.2872	26.1324	O95926	O95926-2;O95926	SYF2_HUMAN	SYF2	Pre-mRNA-splicing factor SYF2
25.2879	23.9609	Q99942	A0A140TA09;Q99942	RNF5_HUMAN	RNF5	E3 ubiquitin-protein ligase RNF5
25.2921	22.8926	Q86VZ5	Q86VZ5-2;Q86VZ5	SMS1_HUMAN	SGMS1	Phosphatidylcholine:ceramide cholinephosphotransferase 1
25.2931	22.3482	A0AV96;A0AV96-2	D6RFL5;D6REZ6;D6RBP6;D6RBS9;D6RA49;D6R9M7;D6R9D6;B7Z8Z7;A0AV96-2;A0AV96	RBM47_HUMAN	RBM47	RNA-binding protein 47
25.2936	24.4105	Q9Y6X4	D6RB01;D6R953;Q9Y6X4	F169A_HUMAN	FAM169A	Soluble lamin-associated protein of 75 kDa
25.2965	26.3293	F6RGN5	F6RGN5	F6RGN5_HUMAN	SLC25A10	Isoform of Q9UBX3, Solute carrier family 25 member 10
25.2986	24.8797	Q96BD0;Q96BD0-3;Q96BD0-4	E1P5H9;Q96BD0-2;Q96BD0-3;Q96BD0-4;Q96BD0	SO4A1_HUMAN	SLCO4A1	Solute carrier organic anion transporter family member 4A1
25.3054	21.6122	P60763	J3KSC4;J3QLK0;P60763	RAC3_HUMAN	RAC3	Ras-related C3 botulinum toxin substrate 3
25.3054	25.3334	Q9HBM0	F8W8C2;Q9HBM0-2;Q9HBM0	VEZA_HUMAN	VEZT	Vezatin
25.3092	25.6414	C9J7I0	C9J7I0	UMAD1_HUMAN	UMAD1	UBAP1-MVB12-associated (UMA)-domain containing protein 1
25.3119	24.8664	Q2TAC6;Q2TAC6-2;Q2TAC6-3	F8VW50;Q2TAC6-2;Q2TAC6-3;Q2TAC6	KIF19_HUMAN	KIF19	Kinesin-like protein KIF19
25.3131	25.9221	Q5QJ74	E9PP54;A0A2R8YFB7;Q5QJ74	TBCEL_HUMAN	TBCEL	Tubulin-specific chaperone cofactor E-like protein
25.3166	24.3063	P04196	P04196	HRG_HUMAN	HRG	Histidine-rich glycoprotein
25.3166	24.8212	Q7Z5L2;Q7Z5L2-2	Q7Z5L2-2;Q7Z5L2-3;A0A384DVK4;Q7Z5L2	R3HCL_HUMAN	R3HCC1L	Coiled-coil domain-containing protein R3HCC1L
25.3176	23.3631	Q96GV9	Q96GV9	MACIR_HUMAN	MACIR	Macrophage immunometabolism regulator
25.3188	25.9563	Q9Y6M4	H0YBN6;Q9Y6M4	KC1G3_HUMAN	CSNK1G3	Casein kinase I isoform gamma-3
25.3194	23.5671	Q10567;Q10567-2	Q10567-2;Q10567	AP1B1_HUMAN	AP1B1	AP-1 complex subunit beta-1
25.3238	24.4455	Q13362-4	A0A8Q3WKR3;Q13362-3;Q13362-4;Q13362-5;Q13362	2A5G_HUMAN	PPP2R5C	Isoform of Q13362, Isoform 4 of Serine/threonine-protein phosphatase 2A 56 kDa regulatory subunit gamma isoform
25.3257	25.8201	Q8TF74	A8MWR2;Q8TF74-2;Q8TF74	WIPF2_HUMAN	WIPF2	WAS/WASL-interacting protein family member 2
25.3267	24.9058	Q8IVL1;Q8IVL1-10;Q8IVL1-11;Q8IVL1-12;Q8IVL1-13;Q8IVL1-2;Q8IVL1-3;Q8IVL1-4;Q8IVL1-8;Q8IVL1-9	Q8IVL1-10;Q8IVL1-11;Q8IVL1-12;Q8IVL1-13;E9PNV5;Q8IVL1-2;Q8IVL1-3;Q8IVL1-4;Q8IVL1-5;Q8IVL1-8;Q8IVL1-9;Q8IVL1	NAV2_HUMAN	NAV2	Neuron navigator 2
25.3269	22.6405	Q9HCM7	A0A7P0Z485;A0A3B3IRR3;Q9HCM7	FBSL_HUMAN	FBRSL1	Fibrosin-1-like protein
25.3313	24.8026	Q2PPJ7;Q2PPJ7-2;Q2PPJ7-3	Q2PPJ7-2;Q2PPJ7-3;H7C1F9;Q2PPJ7	RGPA2_HUMAN	RALGAPA2	Ral GTPase-activating protein subunit alpha-2
25.3326	23.3052	A0A804HIE8;H0Y572	H0Y572;A0A804HIE8	A0A804HIE8_HUMAN;H0Y572_HUMAN	DOCK9	Isoform of Q9BZ29, Dedicator of cytokinesis 9
25.3365	24.5562	Q8WVR3	B3KNS5;Q8WVR3-2;Q8WVR3-3;Q8WVR3	TPC14_HUMAN	TRAPPC14	Trafficking protein particle complex subunit 14
25.3378	28.0551	Q96K58;Q96K58-2	C9JCJ0;Q96K58-2;Q96K58	ZN668_HUMAN	ZNF668	Zinc finger protein 668
25.3385	24.4238	Q14156;Q14156-2	A0A1B0GUZ7;Q14156-2;Q14156	EFR3A_HUMAN	EFR3A	Protein EFR3 homolog A
25.3387	24.8733	Q8TCZ2;Q8TCZ2-2;Q8TCZ2-3;Q8TCZ2-5	A0A0U1RQT8;Q8TCZ2-2;Q8TCZ2-3;Q8TCZ2-5;Q8TCZ2-6;Q8TCZ2	C99L2_HUMAN	CD99L2	CD99 antigen-like protein 2
25.3457	25.1637	Q969M7;Q969M7-6;Q969M7-7	C9J9P8;F8WD80;F8WCT3;F8WDQ9;F8WB39;H3BUI7;H3BSR4;C9JSK8;C9JFD2;Q969M7-2;Q969M7-4;Q969M7-5;Q969M7-6;Q969M7-7;Q969M7	UBE2F_HUMAN	UBE2F	NEDD8-conjugating enzyme UBE2F
25.3472	24.1647	P78357	K7EMM9;P78357	CNTP1_HUMAN	CNTNAP1	Contactin-associated protein 1
25.3483	25.2414	Q9UH17;Q9UH17-3	B0QYD3;Q9UH17-2;Q9UH17-3;Q6ICH2;Q9UH17;Q96AK3	ABC3B_HUMAN	APOBEC3B	DNA dC->dU-editing enzyme APOBEC-3B
25.3488	24.0828	O95674	O95674	CDS2_HUMAN	CDS2	Phosphatidate cytidylyltransferase 2
25.3521	22.2862	Q96NY9	H0YDE3;H0YDU2;H0YDK3;E9PRI1;Q96NY9	MUS81_HUMAN	MUS81	Crossover junction endonuclease MUS81
25.3526	23.697	P63092-2;Q5JWF2-2	P63092-2;Q5JWF2-2;A0A590UK28	GNAS1_HUMAN;GNAS2_HUMAN	GNAS	Isoform of Q5JWF2, Isoform Gnas-2 of Guanine nucleotide-binding protein G(s) subunit alpha isoforms short
25.357	25.6828	Q9H6S1	Q9H6S1-3;Q9H6S1-4;Q9H6S1-5;C9JVK8;Q9H6S1	AZI2_HUMAN	AZI2	5-azacytidine-induced protein 2
25.3593	23.1557	O95168;O95168-2	O95168-2;O95168	NDUB4_HUMAN	NDUFB4	NADH dehydrogenase [ubiquinone] 1 beta subcomplex subunit 4
25.3596	25.6031	Q8N350	A0A140LJL2;Q8N350-4;K7ELJ5;Q8N350	CBARP_HUMAN	CBARP	Voltage-dependent calcium channel beta subunit-associated regulatory protein
25.3606	24.8854	Q9P0N9;Q9P0N9-2;Q9P0N9-3;Q9P0N9-4	Q5SZL3;Q5SZL4;Q5SZL5;Q5SZL6;Q9P0N9-2;Q9P0N9-3;Q9P0N9-4;U3KPS8;Q9P0N9	TBCD7_HUMAN	TBC1D7	TBC1 domain family member 7
25.3656	24.1733	O60779	A0A2R8Y5B5;O60779	S19A2_HUMAN	SLC19A2	Thiamine transporter 1
25.3662	25.3438	P11831	P11831	SRF_HUMAN	SRF	Serum response factor
25.3663	26.7233	Q15652;Q15652-3	Q15652-2;Q15652-3;Q15652	JHD2C_HUMAN	JMJD1C	Probable JmjC domain-containing histone demethylation protein 2C
25.3675	24.2973	O95104;O95104-3	O95104-2;O95104-3;O95104	SCAF4_HUMAN	SCAF4	SR-related and CTD-associated factor 4
25.3687	24.8618	P15848	A0A2U3U034;P15848-2;P15848	ARSB_HUMAN	ARSB	Arylsulfatase B
25.369	26.966	A0A0J9YXR1;A0A286YF23;A0A2R8YFM0	A0A2R8YFM0;A0A286YF23;A0A0J9YXR1	A0A0J9YXR1_HUMAN;A0A286YF23_HUMAN;A0A2R8YFM0_HUMAN	MYO15B	Isoform of Q96JP2, Myosin XVB (Fragment)
25.3706	24.2691	O75781	O75781-2;O75781	PALM_HUMAN	PALM	Paralemmin-1
25.3713	24.8815	Q9H5H4	H3BS42;Q9H5H4	ZN768_HUMAN	ZNF768	Zinc finger protein 768
25.3718	25.45	Q5RI15;Q5RI15-2	Q5RI15-2;Q5RI15	COX20_HUMAN	COX20	Cytochrome c oxidase assembly protein COX20, mitochondrial
25.3723	23.8144	O43414;O43414-2;O43414-3	H0Y4B0;O43414-2;O43414-3;O43414	ERI3_HUMAN	ERI3	ERI1 exoribonuclease 3
25.3738	17.8573	Q9UK53;Q9UK53-2;Q9UK53-3;Q9UK53-4;Q9UK53-5	Q9UK53-2;Q9UK53-3;Q9UK53-4;Q9UK53-5;A0A087WXF7;A0A0C4DFW2;Q9UK53	ING1_HUMAN	ING1	Inhibitor of growth protein 1
25.3745	25.0914	Q2TBE0	H0YE03;Q2TBE0-2;Q2TBE0-3;H7C3G7;Q2TBE0	C19L2_HUMAN	CWF19L2	CWF19-like protein 2
25.375	24.1539	O15156;O15156-2	O15156-2;O15156	ZBT7B_HUMAN	ZBTB7B	Zinc finger and BTB domain-containing protein 7B
25.3752	24.3561	Q9UHC7;Q9UHC7-2;Q9UHC7-3;Q9UHC7-4	C9IY57;Q9UHC7-2;Q9UHC7-3;Q9UHC7-4;C9J031;C9JYX8;Q9UHC7	MKRN1_HUMAN	MKRN1	E3 ubiquitin-protein ligase makorin-1
25.3757	21.9052	Q96A73	A0A087WT18;Q96A73-2;Q96A73-3;Q96A73	P33MX_HUMAN	KIAA1191	Putative monooxygenase p33MONOX
25.3762	24.237	Q9NYT0	H0YJD0;H0YJ64;Q9NYT0	PLEK2_HUMAN	PLEK2	Pleckstrin-2
25.3798	22.6795	Q86UR5;Q86UR5-4;Q86UR5-5	H0YBU6;H0YBE7;Q86UR5-3;Q86UR5-4;Q86UR5-5;Q86UR5-6;Q86UR5-7;Q86UR5-8;Q86UR5-9;A0A8V8TKU9;Q86UR5-10;Q86UR5-11;Q86UR5-12;Q86UR5-13;A0A0C4DFV1;Q86UR5	RIMS1_HUMAN	RIMS1	Regulating synaptic membrane exocytosis protein 1
25.3834	24.577	O60266	A0A0A0MSC1;O60266-2;U3KQ91;O60266	ADCY3_HUMAN	ADCY3	Adenylate cyclase type 3
25.3854	25.1827	O43663-2	O43663-2;O43663-4	PRC1_HUMAN	PRC1	Isoform of O43663, Isoform 2 of Protein regulator of cytokinesis 1
25.387	24.2142	Q96PE3;Q96PE3-2;Q96PE3-3;Q96PE3-4	Q96PE3-2;Q96PE3-3;Q96PE3-4;Q96PE3	INP4A_HUMAN	INPP4A	Inositol polyphosphate-4-phosphatase type I A
25.3879	25.377	P60673	P60673	PROF3_HUMAN	PFN3	Profilin-3
25.3925	22.7684	Q9NW38;Q9NW38-2	Q9NW38-2;B4DN24;B5MC31;H7C1M0;A0A8Q3WMH1;A0A8Q3WMB2;A0A8Q3WMB7;A0A8Q3WMD8;A0A8Q3WMF8;A0A8Q3WLW1;A0A8Q3WM87;A0A8Q3WLU8;A0A8Q3WM99;A0A8Q3WLF1;A0A8Q3WLE2;A0A8Q3WLF5;A0A8Q3WLH7;A0A8Q3WLA4;A0A8Q3WLA5;A0A8Q3WLB5;A0A8Q3WLB8;A0A8Q3WLD6;A0A8Q3WL63;A0A8Q3WL68;A0A8Q3WLC1;A0A8Q3WLC2;A0A8Q3WL81;A0A8Q3WL86;A0A8Q3WL92;A0A8Q3SIL3;A0A8Q3SIK5;A0A8Q3SIK6;A0A8Q3SIM1;A0A8Q3SIM8;A0A8Q3SIP2;A0A8Q3SIP3;A0A8Q3SIQ5;A0A8Q3…	FANCL_HUMAN	FANCL	E3 ubiquitin-protein ligase FANCL
25.394	26.371	O95625	A0A8I5QKX4;A0A8I5KRR0;A0A994J7A5;O95625	ZBT11_HUMAN	ZBTB11	Zinc finger and BTB domain-containing protein 11
25.3975	25.4949	Q969R2;Q969R2-2;Q969R2-3;Q969R2-4;Q969R2-5;Q969R2-6	Q6ZN50;A0A0A0MSB4;H7C428;H7C368;H7C001;Q969R2-2;Q969R2-3;Q969R2-4;Q969R2-5;Q969R2-6;Q969R2	OSBP2_HUMAN	OSBP2	Oxysterol-binding protein 2
25.3983	25.2665	Q5TCX8	Q5TCX8-3;Q5TCX8	M3K21_HUMAN	MAP3K21	Mitogen-activated protein kinase kinase kinase 21
25.4002	24.5701	O77932	F8WC68;O77932	DXO_HUMAN	DXO	Decapping and exoribonuclease protein
25.4055	25.4738	Q14678	A0A8I5QKT2;Q14678-2;A0A8J9BYE6;A0A8I5KNW9;A0A8I5KP85;A0A8I5KRP2;A0A8I5KTS9;A0A8I5KUM3;A0A8I5KUI5;A0A8I5KUD8;A0A8I5KT40;A0A8I5KSV2;A0A8I5KVK4;A0A8I5KZ49;A0A8I5KXH8;Q14678	KANK1_HUMAN	KANK1	KN motif and ankyrin repeat domain-containing protein 1
25.4058	25.0253	A1L390	A0A8C8NWT4;A0A0U1RR71;G3V311;A1L390-2;A1L390-3;A1L390	PKHG3_HUMAN	PLEKHG3	Pleckstrin homology domain-containing family G member 3
25.4064	26.1949	Q8WVK7	J3KRZ0;J3KTC5;Q8WVK7	SKA2_HUMAN	SKA2	Spindle and kinetochore-associated protein 2
25.407	21.1037	A0A494C0Y9;A0A8V8TNY3	A0A8V8TNY3;A0A494C0Y9	A0A494C0Y9_HUMAN;A0A8V8TNY3_HUMAN	FAM120A	Isoform of Q9NZB2, Family with sequence similarity 120A (Fragment)
25.4104	23.0554	Q86V85	Q86V85	GP180_HUMAN	GPR180	Integral membrane protein GPR180
25.4105	24.6692	Q16798	Q16798-2;E9PNN2;E9PMB9;Q16798	MAON_HUMAN	ME3	NADP-dependent malic enzyme, mitochondrial
25.4107	25.9083	Q9P0M9	D6RAN8;H7C5U8;Q9P0M9	RM27_HUMAN	MRPL27	Large ribosomal subunit protein bL27m
25.4138	21.4996	Q15013;Q15013-3	Q15013-3;Q15013	MD2BP_HUMAN	MAD2L1BP	MAD2L1-binding protein
25.4161	24.0165	Q8NEJ9;Q8NEJ9-2	Q8NEJ9-2;H0YJQ1;H0YJ17;G3V4G1;A0A8V8TRJ3;A0A8V8TQS3;Q8NEJ9	NGDN_HUMAN	NGDN	Neuroguidin
25.4191	24.3268	Q9Y4U1	A0A0C4DGU2;Q9Y4U1	MMAC_HUMAN	MMACHC	Cyanocobalamin reductase / alkylcobalamin dealkylase
25.4202	26.3664	O43676	O43676	NDUB3_HUMAN	NDUFB3	NADH dehydrogenase [ubiquinone] 1 beta subcomplex subunit 3
25.4207	23.4113	O75151	E7ET14;A0A087WW48;O75151	PHF2_HUMAN	PHF2	Lysine-specific demethylase PHF2
25.4212	25.6018	Q96TC7	H0YNE5;H0YLG5;Q96TC7	RMD3_HUMAN	RMDN3	Regulator of microtubule dynamics protein 3
25.424	23.2562	P49759;P49759-3	F8WBF5;P49759-3;Q9HAZ1;P49759	CLK1_HUMAN	CLK1	Dual specificity protein kinase CLK1
25.4249	23.5863	P51530;P51530-3;P51530-4	P51530-2;P51530-3;P51530-4;F8VR31;P51530	DNA2_HUMAN	DNA2	DNA replication ATP-dependent helicase/nuclease DNA2
25.4301	23.0916	Q5TC84	Q5TC84	OGRL1_HUMAN	OGFRL1	Opioid growth factor receptor-like protein 1
25.4304	25.0252	Q8IYT2	Q8IYT2	CMTR2_HUMAN	CMTR2	Cap-specific mRNA (nucleoside-2'-O-)-methyltransferase 2
25.4312	26.1262	O75554;O75554-2	O75554-2;O75554	WBP4_HUMAN	WBP4	WW domain-binding protein 4
25.4352	27.2036	Q9Y320;Q9Y320-2	Q9Y320-2;Q9Y320	TMX2_HUMAN	TMX2	Thioredoxin-related transmembrane protein 2
25.436	26.3837	Q9UHA3	H3BMQ2;A0A7I2V2C6;A0A7I2V359;Q9UHA3	RLP24_HUMAN	RSL24D1	Probable ribosome biogenesis protein RLP24
25.4362	25.8733	Q8TB96	F5GXC5;Q8TB96	TIP_HUMAN	ITFG1	T-cell immunomodulatory protein
25.4368	25.0905	Q9UHQ9	H7C0R7;Q9UHQ9	NB5R1_HUMAN	CYB5R1	NADH-cytochrome b5 reductase 1
25.438	26.3282	Q5T280	Q5T280	CI114_HUMAN	SPOUT1	Putative methyltransferase C9orf114
25.4399	24.0984	Q15560	Q86VL0;Q15560	TCEA2_HUMAN	TCEA2	Transcription elongation factor A protein 2
25.442	24.8997	Q96DP5	H3BTN9;Q96DP5-2;Q96DP5	FMT_HUMAN	MTFMT	Methionyl-tRNA formyltransferase, mitochondrial
25.4438	24.29	Q03405	Q03405-2;Q03405-3;M0R1I2;M0R0Y4;M0R0H5;M0R2E9;M0QX27;M0QYR6;Q03405	UPAR_HUMAN	PLAUR	Urokinase plasminogen activator surface receptor
25.4447	23.1002	Q9BQD3	M0R0B4;M0R2G3;M0R228;M0QXN9;M0QXP3;M0QY77;M0QX74;Q9BQD3	KXDL1_HUMAN	KXD1	KxDL motif-containing protein 1
25.445	24.7659	Q7Z6J0	Q7Z6J0	SH3R1_HUMAN	SH3RF1	E3 ubiquitin-protein ligase SH3RF1
25.4451	25.5712	Q9UBN7	A0A2R8Y559;Q9UBN7-2;A0A2R8YDE6;A0A2R8YCS4;A0A8V8TM63;A0A8V8TMA5;A0A8V8TL08;A0A8V8TKY7;Q9UBN7	HDAC6_HUMAN	HDAC6	Histone deacetylase 6
25.4469	25.3689	O14763;O14763-2	O14763-2;O14763	TR10B_HUMAN	TNFRSF10B	Tumor necrosis factor receptor superfamily member 10B
25.4473	24.2219	Q9UBL6;Q9UBL6-2	Q9UBL6-2;Q9UBL6	CPNE7_HUMAN	CPNE7	Copine-7
25.4483	24.2541	Q9BWT7	Q9BWT7	CAR10_HUMAN	CARD10	Caspase recruitment domain-containing protein 10
25.4499	23.4009	P10589	A0A8V8TQQ6;A0A8V8TPV3;F1DAL9;F1DAL7;P24468-2;P24468-3;P10589;P24468	COT1_HUMAN	NR2F1	COUP transcription factor 1
25.4511	23.5447	Q6NVV7	F6RAJ7;Q6NVV7	CDPF1_HUMAN	CDPF1	Cysteine-rich DPF motif domain-containing protein 1
25.4512	25.0072	O43166;O43166-2;O43166-3	O43166-2;O43166-3;F5GYF8;O43166	SI1L1_HUMAN	SIPA1L1	Signal-induced proliferation-associated 1-like protein 1
25.4515	24.8457	Q12882	Q12882	DPYD_HUMAN	DPYD	Dihydropyrimidine dehydrogenase [NADP(+)]
25.4518	26.239	O75746	H0YFB2;F8W9J0;B4DGK6;O75746	S2512_HUMAN	SLC25A12	Electrogenic aspartate/glutamate antiporter SLC25A12, mitochondrial
25.4527	26.616	O75529	O75529	TAF5L_HUMAN	TAF5L	TAF5-like RNA polymerase II p300/CBP-associated factor-associated factor 65 kDa subunit 5L
25.453	23.1075	O75164	O75164-2;O75164	KDM4A_HUMAN	KDM4A	Lysine-specific demethylase 4A
25.4534	25.0337	Q9NYH9	Q9NYH9	UTP6_HUMAN	UTP6	U3 small nucleolar RNA-associated protein 6 homolog
25.454	24.3845	Q15582	H0Y8L3;Q15582	BGH3_HUMAN	TGFBI	Transforming growth factor-beta-induced protein ig-h3
25.4549	24.2467	Q9Y2G8	Q5TDG9;Q5TDH4;Q9Y2G8	DJC16_HUMAN	DNAJC16	DnaJ homolog subfamily C member 16
25.4552	25.4233	Q13510;Q13510-2	A0A1B0GUW4;A0A1B0GV06;A0A1B0GUE3;A0A1B0GUG1;A0A1B0GUH5;A0A1B0GTZ5;A0A1B0GUA4;A0A1B0GTM3;A0A1B0GTP7;A0A1B0GW68;E7EMM4;Q13510-2;Q13510-3;Q13510	ASAH1_HUMAN	ASAH1	Acid ceramidase
25.4572	27.2512	Q01804	Q01804-3;Q01804-5;Q01804	OTUD4_HUMAN	OTUD4	OTU domain-containing protein 4
25.4576	24.4446	Q5VV42	Q5VV42-2;Q5VV42	CDKAL_HUMAN	CDKAL1	Threonylcarbamoyladenosine tRNA methylthiotransferase
25.4586	25.474	P51157	H0Y9S6;H0Y927;P51157-2;P51157-3;P51157	RAB28_HUMAN	RAB28	Ras-related protein Rab-28
25.463	25.6596	Q14980-2	H0YFY6;K4DIE0;Q14980-2	NUMA1_HUMAN	NUMA1	Isoform of Q14980, Isoform 2 of Nuclear mitotic apparatus protein 1
25.4636	22.8949	Q9Y2F5	Q9Y2F5	ICE1_HUMAN	ICE1	Little elongation complex subunit 1
25.4636	25.1417	Q9H9A7	A0A0A0MSU3;Q9H9A7	RMI1_HUMAN	RMI1	RecQ-mediated genome instability protein 1
25.4658	26.7768	O75496	H7C608;E2QRF9;O75496	GEMI_HUMAN	GMNN	Geminin
25.4672	25.6113	Q8NDX5-7	E7EX82;Q8NDX5-2;Q8NDX5-7;Q8NDX5	PHC3_HUMAN	PHC3	Isoform of Q8NDX5, Isoform 7 of Polyhomeotic-like protein 3
25.4695	25.9787	O00522	C9J718;O00522-2;O00522-3;C9JIY2;C9JF32;A0A8I5KQD8;A0A8I5KUF9;A0A8I5KW41;A0A3B3ITR4;A0A8I5KWQ7;C9JD81;O00522	KRIT1_HUMAN	KRIT1	Krev interaction trapped protein 1
25.4715	24.6491	Q99502;Q99502-2;Q99502-3	Q99502-2;Q99502-3;A6NCB9;A0A2R8Y6K4;E7EQM5;A0A2R8YGM9;F8WB53;A0A2R8YET7;Q99502	EYA1_HUMAN	EYA1	Eyes absent homolog 1
25.4734	26.2562	Q9UBT7;Q9UBT7-2	Q9UBT7-2;Q9UBT7-3;Q9UBT7	CTNL1_HUMAN	CTNNAL1	Alpha-catulin
25.4735	26.5029	Q86T24	Q86T24	KAISO_HUMAN	ZBTB33	Transcriptional regulator Kaiso
25.4737	24.556	Q96JI7	C4B7M2;H0YLK7;Q96JI7-2;Q96JI7-3;A0A804HI99;A0A804HID9;A0A804HLE6;A0A804HLC5;A0A804HK59;Q96JI7	SPTCS_HUMAN	SPG11	Spatacsin
25.4786	26.1705	Q9HBF4;Q9HBF4-3	G3V5N8;Q9HBF4-3;Q9HBF4	ZFYV1_HUMAN	ZFYVE1	Zinc finger FYVE domain-containing protein 1
25.4787	24.288	Q96GF1	Q96GF1	RN185_HUMAN	RNF185	E3 ubiquitin-protein ligase RNF185
25.4808	25.8282	Q5H8A4;Q5H8A4-2;Q5H8A4-4	E7EWV1;D6RFE8;D6R9J9;E7EM50;Q5H8A4-6;Q5H8A4-2;Q5H8A4-4;Q5H8A4-5;Q5H8A4	PIGG_HUMAN	PIGG	GPI ethanolamine phosphate transferase 2
25.484	NaN	K7ENV7	K7ENV7	K7ENV7_HUMAN	ISOC2	Isoform of Q96AB3, Isochorismatase domain containing 2 (Fragment)
25.4858	25.1795	Q92930	H0YNE9;Q92930	RAB8B_HUMAN	RAB8B	Ras-related protein Rab-8B
25.4893	27.248	P08962;P08962-2;P08962-3	F8VV56;F8VWK8;F8VNT9;F8W022;P08962-2;P08962-3;P08962	CD63_HUMAN	CD63	CD63 antigen
25.4901	24.9817	O75167;O75167-2;O75167-4;O75167-5	J3KP75;O75167-2;O75167-4;O75167-5;F5H858;H9KVA6;O75167	PHAR2_HUMAN	PHACTR2	Phosphatase and actin regulator 2
25.4918	21.5953	Q92545	Q92545	TM131_HUMAN	TMEM131	Transmembrane protein 131
25.4923	27.405	Q5VU43-13	Q5VU43-2;Q5VU43-3;Q5VU43-4;Q5VU43-6;Q5VU43-7;A0A075B749;Q5VU43-13;E9PQG4;A0A8Q3WM32;A0A8Q3SI83;A0A8Q3SI21;A0A994J5E0;A0A087WX83;Q5VU43	MYOME_HUMAN	PDE4DIP	Isoform of Q5VU43, Isoform 13 of Myomegalin
25.4928	23.2921	Q99487	Q99487	PAFA2_HUMAN	PAFAH2	Platelet-activating factor acetylhydrolase 2, cytoplasmic
25.4964	24.1704	O15516	O15516	CLOCK_HUMAN	CLOCK	Circadian locomoter output cycles protein kaput
25.4991	23.1504	P02751;P02751-1;P02751-10;P02751-11;P02751-12;P02751-13;P02751-14;P02751-17;P02751-3;P02751-5;P02751-6;P02751-7;P02751-8;P02751-9	H0Y7Z1;P02751-10;P02751-11;P02751-12;P02751-13;P02751-14;P02751-17;P02751-7;P02751-1;P02751-3;P02751-4;P02751-5;P02751-6;P02751-8;P02751-9;P02751	FINC_HUMAN	FN1	Fibronectin
25.4998	24.2407	Q9NYG2;Q9NYG2-2	F8W6M3;H0Y6A5;Q9NYG2-2;A0A994J7J2;Q9NYG2	ZDHC3_HUMAN	ZDHHC3	Palmitoyltransferase ZDHHC3
25.5005	25.7349	Q99958	Q99958	FOXC2_HUMAN	FOXC2	Forkhead box protein C2
25.5006	25.8283	Q15723;Q15723-1;Q15723-2;Q15723-3	Q15723-1;Q15723-2;Q15723-3;Q15723-4;Q15723	ELF2_HUMAN	ELF2	ETS-related transcription factor Elf-2
25.5027	22.086	Q99836;Q99836-5;Q99836-6	A0A3F2YP85;A0A0A0MSI9;A0A8V8TP38;A0A494C0J8;A0A3B3ITY3;Q99836-2;Q99836-3;Q99836-4;Q99836-5;Q99836-6;Q99836	MYD88_HUMAN	MYD88	Myeloid differentiation primary response protein MyD88
25.5037	24.9088	Q9NRH2	E7EUC4;Q9NRH2	SNRK_HUMAN	SNRK	SNF-related serine/threonine-protein kinase
25.5074	25.5946	Q9ULL5;Q9ULL5-2	Q9ULL5-2;Q9ULL5	PRR12_HUMAN	PRR12	Proline-rich protein 12
25.5095	24.9255	P30711	P30711	GSTT1_HUMAN	GSTT1	Glutathione S-transferase theta-1
25.5098	24.8802	Q96FH0;Q96FH0-2	Q96FH0-2;Q96FH0	BORC8_HUMAN	BORCS8	BLOC-1-related complex subunit 8
25.5116	20.7404	Q13114	H0YL26;A6NHG8;Q13114-2;Q13114	TRAF3_HUMAN	TRAF3	TNF receptor-associated factor 3
25.512	24.8834	Q15051	C9JVC4;Q15051-2;Q15051-3;Q15051	IQCB1_HUMAN	IQCB1	IQ calmodulin-binding motif-containing protein 1
25.5124	21.1313	Q92817	K7EKI0;Q92817	EVPL_HUMAN	EVPL	Envoplakin
25.5144	24.4226	Q6UWZ7	D6REL5;Q6UWZ7-2;Q6UWZ7	ABRX1_HUMAN	ABRAXAS1	BRCA1-A complex subunit Abraxas 1
25.5176	23.1235	Q96NT5;Q96NT5-2	Q96NT5-2;J3QRF7;Q96NT5	PCFT_HUMAN	SLC46A1	Proton-coupled folate transporter
25.5187	26.0758	Q6IAN0	A0A0C4DGQ8;Q6IAN0	DRS7B_HUMAN	DHRS7B	Dehydrogenase/reductase SDR family member 7B
25.5202	24.0789	Q32NC0	A0A087X0E7;Q32NC0	CR021_HUMAN	C18orf21	UPF0711 protein C18orf21
25.5243	24.9363	Q14938;Q14938-2;Q14938-4	C9JWJ8;B4DHW2;A0A8J8YL86;K7EN08;Q14938-2;Q14938-3;Q14938-4;Q14938-5;Q14938-6;A0A8I5KYE6;A0A087WXP2;Q14938	NFIX_HUMAN	NFIX	Nuclear factor 1 X-type
25.5247	22.2699	Q9H0U9	Q9H0U9	TSYL1_HUMAN	TSPYL1	Testis-specific Y-encoded-like protein 1
25.5265	25.541	O60658	O60658-2;O60658-6;O60658	PDE8A_HUMAN	PDE8A	High affinity cAMP-specific and IBMX-insensitive 3',5'-cyclic phosphodiesterase 8A
25.5281	24.1884	Q03013	Q03013-3;Q03013	GSTM4_HUMAN	GSTM4	Glutathione S-transferase Mu 4
25.5293	24.0994	Q8WW22;Q8WW22-2;Q8WW22-3	Q8WW22-2;Q8WW22-3;Q8WW22	DNJA4_HUMAN	DNAJA4	DnaJ homolog subfamily A member 4
25.5316	24.1054	Q5T9L3;Q5T9L3-2	E9PQK1;E9PM62;Q5T9L3-2;Q7Z430;Q5T9L3	WLS_HUMAN	WLS	Protein wntless homolog
25.5358	26.8761	Q66GS9	Q66GS9	CP135_HUMAN	CEP135	Centrosomal protein of 135 kDa
25.5365	23.2492	M0R2J8	A0A804HJA9;M0R2J8	DCDC1_HUMAN	DCDC1	Doublecortin domain-containing protein 1
25.5372	23.533	Q8NFI3	Q8NFI3-2;Q8NFI3	ENASE_HUMAN	ENGASE	Cytosolic endo-beta-N-acetylglucosaminidase
25.5373	22.4709	Q14145	K7EJD8;K7EJ49;K7ESE0;Q14145	KEAP1_HUMAN	KEAP1	Kelch-like ECH-associated protein 1
25.538	24.5332	P30536	B1AH87;P30536	TSPO_HUMAN	TSPO	Translocator protein
25.5385	20.2444	Q6P5Z2	Q6P5Z2	PKN3_HUMAN	PKN3	Serine/threonine-protein kinase N3
25.5405	25.2352	Q96K49;Q96K49-2	A0A494BZZ8;H7C0B3;Q96K49-2;A0A3B3IU29;Q96K49	TM87B_HUMAN	TMEM87B	Transmembrane protein 87B
25.5406	24.5817	Q14849;Q14849-2;Q14849-3	J3KSL3;J3KSH0;J3KT87;C9J555;Q14849-2;Q14849-3;J3QLM1;J3QLA7;J3QLS1;J3QRG8;J3QS10;Q14849	STAR3_HUMAN	STARD3	StAR-related lipid transfer protein 3
25.5429	24.773	P10301	P10301	RRAS_HUMAN	RRAS	Ras-related protein R-Ras
25.5447	17.8766	P15407	P15407	FOSL1_HUMAN	FOSL1	Fos-related antigen 1
25.5453	24.2757	A0A994J7P9	A0A994J7P9	A0A994J7P9_HUMAN	FXR2	Isoform of P51116, FMR1 autosomal homolog 2
25.5456	23.3778	Q13488	E9PNA6;E9PM12;A0A8V8TM28;Q13488	VPP3_HUMAN	TCIRG1	V-type proton ATPase 116 kDa subunit a 3
25.5472	24.6187	Q8TBZ3;Q8TBZ3-2;Q8TBZ3-4;Q8TBZ3-5;Q8TBZ3-6;Q8TBZ3-7	H0YNU0;Q8TBZ3-2;Q8TBZ3-4;Q8TBZ3-5;Q8TBZ3-6;Q8TBZ3-7;A0A088AWN2;Q8TBZ3	WDR20_HUMAN	WDR20	WD repeat-containing protein 20
25.5498	24.6119	Q5SXM2	A0A8I5QKS3;A0A1B0GUB4;Q5SXM2	SNPC4_HUMAN	SNAPC4	snRNA-activating protein complex subunit 4
25.5539	24.5102	Q96JM2;Q96JM2-3	Q96JM2-2;Q96JM2-3;H3BLX4;Q96JM2	ZN462_HUMAN	ZNF462	Zinc finger protein 462
25.5548	25.1659	Q96LA8	A0A3B3ITK4;Q96LA8	ANM6_HUMAN	PRMT6	Protein arginine N-methyltransferase 6
25.5552	21.5925	Q6ZVK8	Q6ZVK8-2;Q6ZVK8	NUD18_HUMAN	NUDT18	8-oxo-dGDP phosphatase NUDT18
25.5564	25.6352	O75352;O75352-2	J3KSI4;J3KT75;J3KTK8;O75352-2;I3L4E0;I3L405;I3L295;I3L261;I3L1D2;J3QQZ4;J3QRD5;J3QS48;J3QW43;O75352	MPU1_HUMAN	MPDU1	Mannose-P-dolichol utilization defect 1 protein
25.5564	24.5853	Q8IWI9	H3BU53;A0A8C8P5L8;Q8IWI9-3;A0A994J6L2;Q8IWI9	MGAP_HUMAN	MGA	MAX gene-associated protein
25.5575	24.3382	Q9HA92	Q9HA92	RSAD1_HUMAN	RSAD1	Radical S-adenosyl methionine domain-containing protein 1, mitochondrial
25.558	25.1529	Q9P2C4	A0A804HII6;Q9P2C4	TM181_HUMAN	TMEM181	Transmembrane protein 181
25.5582	25.354	Q9BQE4	A0A182DWI4;E9PN30;Q9BQE4	SELS_HUMAN	SELENOS	Selenoprotein S
25.5583	26.4044	Q9H582	Q9H582-2;Q9H582	ZN644_HUMAN	ZNF644	Zinc finger protein 644
25.5594	24.7138	Q13424	Q13424-2;Q13424	SNTA1_HUMAN	SNTA1	Alpha-1-syntrophin
25.5603	22.3404	Q9NVS2;Q9NVS2-2	Q9NVS2-2;Q9NVS2-3;Q5QPA5;Q9NVS2	RT18A_HUMAN	MRPS18A	Large ribosomal subunit protein mL66
25.5609	22.9425	Q92546	Q92546	RGP1_HUMAN	RGP1	RAB6A-GEF complex partner protein 2
25.561	22.7105	P82921	P82921	RT21_HUMAN	MRPS21	Small ribosomal subunit protein bS21m
25.5624	23.9658	Q96CG3	Q96CG3	TIFA_HUMAN	TIFA	TRAF-interacting protein with FHA domain-containing protein A
25.5629	27.2696	Q8IZD4	Q8IZD4-2;F5GZK9;Q8IZD4	DCP1B_HUMAN	DCP1B	mRNA-decapping enzyme 1B
25.5638	25.2738	O43513	E5RIE8;O43513	MED7_HUMAN	MED7	Mediator of RNA polymerase II transcription subunit 7
25.5646	24.6866	Q9BW62	Q5T558;A2A3H2;Q9BW62	KATL1_HUMAN	KATNAL1	Katanin p60 ATPase-containing subunit A-like 1
25.5697	25.8918	P07711;P07711-3	Q5T8F0;P07711-3;A0A7I2YQA2;A0A7I2YQB5;A0A7I2V2H7;A0A7I2V5M3;P07711	CATL1_HUMAN	CTSL	Procathepsin L
25.5706	25.0732	Q9NZ53	Q9NZ53-2;Q9NZ53	PDXL2_HUMAN	PODXL2	Podocalyxin-like protein 2
25.571	23.0007	Q13574-3	Q13574-1;Q13574-3;Q13574-4;Q13574-5;Q13574-6;Q13574-7;E9PNL8;Q13574	DGKZ_HUMAN	DGKZ	Isoform of Q13574, Isoform 3 of Diacylglycerol kinase zeta
25.5716	25.5691	Q8TDJ6;Q8TDJ6-3	H0YLM8;Q8TDJ6-2;Q8TDJ6-3;Q8TDJ6	DMXL2_HUMAN	DMXL2	DmX-like protein 2
25.572	25.7418	Q9P2L0;Q9P2L0-2	F8WB94;H0Y6C0;Q9P2L0-2;Q9P2L0	WDR35_HUMAN	WDR35	WD repeat-containing protein 35
25.573	26.0732	Q9H0N5	H0YA52;Q9H0N5	PHS2_HUMAN	PCBD2	Pterin-4-alpha-carbinolamine dehydratase 2
25.5748	23.8581	Q96F25	Q96F25	ALG14_HUMAN	ALG14	UDP-N-acetylglucosamine transferase subunit ALG14 homolog
25.5759	24.6481	O14672	O14672	ADA10_HUMAN	ADAM10	Disintegrin and metalloproteinase domain-containing protein 10
25.5786	26.0598	Q9UJQ4	Q9UJQ4	SALL4_HUMAN	SALL4	Sal-like protein 4
25.5792	25.4223	P23743	P23743-3;F8W1H7;G3V4E1;P23743	DGKA_HUMAN	DGKA	Diacylglycerol kinase alpha
25.5794	25.7069	Q9P0J0	Q9P0J0-2;Q9P0J0	NDUAD_HUMAN	NDUFA13	NADH dehydrogenase [ubiquinone] 1 alpha subcomplex subunit 13
25.5805	24.4896	Q6UB99	A0A2R8Y438;Q6UB99	ANR11_HUMAN	ANKRD11	Ankyrin repeat domain-containing protein 11
25.581	20.8946	Q9NZJ7;Q9NZJ7-2	H0Y8C3;Q9NZJ7-2;A0A8Q3WLQ4;A0A8Q3WLQ9;A0A8Q3WKC1;A0A8Q3WKC8;A0A8Q3WKF6;A0A8Q3WKA3;A0A8Q3WKA4;A0A8Q3WKA5;A0A8Q3WLF0;A0A8Q3WKU8;A0A8Q3SHR5;A0A8Q3SHJ3;A0A8Q3SHK9;A0A8Q3SHP5;A0A8Q3SHP9;Q9NZJ7	MTCH1_HUMAN	MTCH1	Mitochondrial carrier homolog 1
25.5819	25.9624	Q9NYR9;Q9NYR9-2	Q9NYR9-2;Q9NYR9-3;H7BXP1;K7ERG2;Q9NYR9	KBRS2_HUMAN	NKIRAS2	NF-kappa-B inhibitor-interacting Ras-like protein 2
25.5834	23.4868	Q9H7X7	Q9H7X7-2;Q9H7X7	IFT22_HUMAN	IFT22	Intraflagellar transport protein 22 homolog
25.5835	25.1369	Q92667;Q92667-2	I3L3K1;I3L364;I3L2N7;I3L2A2;I3L0K6;Q92667-2;Q92667	AKAP1_HUMAN	AKAP1	A-kinase anchor protein 1, mitochondrial
25.5856	24.3695	P20337;Q96E17	P20337;Q96E17	RAB3B_HUMAN;RAB3C_HUMAN	RAB3B;RAB3C	Ras-related protein Rab-3B
25.5929	25.1355	Q12980	B7Z6Q0;Q12980	NPRL3_HUMAN	NPRL3	GATOR complex protein NPRL3
25.5958	24.4815	P53778;P53778-2	P53778-2;B5MDL5;P53778	MK12_HUMAN	MAPK12	Mitogen-activated protein kinase 12
25.5972	25.0672	Q9BV19	Q9BV19	CA050_HUMAN	C1orf50	Uncharacterized protein C1orf50
25.5994	24.2448	Q9Y2Y1	Q9Y2Y1	RPC10_HUMAN	POLR3K	DNA-directed RNA polymerase III subunit RPC10
25.5999	24.4538	Q9H869-2;Q9H869-3;Q9H869-9	Q9H869-2;Q9H869-3;Q9H869-4;Q9H869-5;Q9H869-6;Q9H869-7;Q9H869-8;Q9H869-9;Q9H869	YYAP1_HUMAN	YY1AP1	Isoform of Q9H869, Isoform 2 of YY1-associated protein 1
25.6014	25.7494	Q9NXU5	Q9NXU5	ARL15_HUMAN	ARL15	ADP-ribosylation factor-like protein 15
25.6016	22.0572	P48730	B0QY34;B0QY35;B0QY36;H0Y645;P48730-2;H7BYT1;H7C3J2;A0A669KBC0;J3QQI9;P49674;P48730	KC1D_HUMAN	CSNK1D	Casein kinase I isoform delta
25.6048	24.8533	Q53R41	Q53R41-2;Q53R41	FAKD1_HUMAN	FASTKD1	FAST kinase domain-containing protein 1, mitochondrial
25.607	24.9913	A1A4S6	A1A4S6	RHG10_HUMAN	ARHGAP10	Rho GTPase-activating protein 10
25.6075	27.1997	Q8N302	A0A2R8YFF1;Q8N302	AGGF1_HUMAN	AGGF1	Angiogenic factor with G patch and FHA domains 1
25.6081	25.4706	Q9NSA3	Q9NSA3	CNBP1_HUMAN	CTNNBIP1	Beta-catenin-interacting protein 1
25.6085	25.7652	Q15329;Q15329-2	C9JYE9;H0YBW8;H0YBK0;E5RHD4;Q15329-2;Q15329-3;Q15329	E2F5_HUMAN	E2F5	Transcription factor E2F5
25.6091	24.077	Q9Y3C7	I3L2J1;Q9Y3C7	MED31_HUMAN	MED31	Mediator of RNA polymerase II transcription subunit 31
25.6093	26.7215	Q13686	H0YJF3;G3V4M4;Q13686	ALKB1_HUMAN	ALKBH1	Nucleic acid dioxygenase ALKBH1
25.6099	23.1345	Q15326;Q15326-2;Q15326-3;Q15326-4;Q15326-6	B0QZE2;E7EV75;A0A0D9SGD6;A0A0A0MRY2;A0A994J6Y5;Q15326-2;Q15326-3;Q15326-4;Q15326-6;A0A994J4C0;Q15326	ZMY11_HUMAN	ZMYND11	Zinc finger MYND domain-containing protein 11
25.6101	26.2878	Q9H936	K4DIA2;K4DIA8;K4DIB0;K4DIB3;K4DIB4;K4DIB6;K4DIB8;A0A0D9SEI9;A0A0D9SG84;A0A0D9SFA8;A0A0D9SFE1;E9PS95;E9PQ36;A0A0A6YYN8;E9PJH7;E9PJY0;E9PI74;Q9H936	GHC1_HUMAN	SLC25A22	Mitochondrial glutamate carrier 1
25.6126	23.4303	P25686;P25686-2	C9JXB9;C9JRD2;P25686-2;P25686	DNJB2_HUMAN	DNAJB2	DnaJ homolog subfamily B member 2
25.6149	25.0758	B2RTY4;B2RTY4-2;B2RTY4-4	H3BRD5;H3BMM1;B2RTY4-2;B2RTY4-4;B2RTY4-5;B2RTY4	MYO9A_HUMAN	MYO9A	Unconventional myosin-IXa
25.6177	23.9328	Q12851;Q12851-2	Q12851-2;Q12851	M4K2_HUMAN	MAP4K2	Mitogen-activated protein kinase kinase kinase kinase 2
25.6181	22.8812	P20827;P20827-2	P20827-2;P20827	EFNA1_HUMAN	EFNA1	Ephrin-A1
25.6183	26.1342	Q53H47	Q53H47-3;Q53H47	SETMR_HUMAN	SETMAR	Histone-lysine N-methyltransferase SETMAR
25.6201	26.2242	Q5VWQ8;Q5VWQ8-5	A0A8V8TNA8;A0A3B3ITG3;Q5VWQ8-2;Q5VWQ8-3;Q5VWQ8-4;Q5VWQ8-5;Q5VWQ8	DAB2P_HUMAN	DAB2IP	Disabled homolog 2-interacting protein
25.6208	23.4366	Q6P4E1;Q6P4E1-5	Q6P4E1-2;Q6P4E1-5;A0A3B3IRW9;Q6P4E1	GOLM2_HUMAN	GOLM2	Protein GOLM2
25.6212	25.9574	Q96S66	A0A6Q8PFH1;A0A6Q8PG75;A0A6Q8PFT6;A0A6Q8PG30;A0A6Q8PG68;A0A6Q8PGA4;A0A6Q8PEZ7;A0A6Q8PF11;A0A6Q8PF97;A0A6Q8PHQ1;Q96S66-2;Q96S66-3;Q96S66-4;A0A8I5KRC0;A0A8I5KXB0;Q96S66	CLCC1_HUMAN	CLCC1	Chloride channel CLIC-like protein 1
25.6214	24.8809	P13196	P13196	HEM1_HUMAN	ALAS1	5-aminolevulinate synthase, non-specific, mitochondrial
25.6241	22.6749	P28827;P28827-2	E7EPS8;P28827-2;P28827	PTPRM_HUMAN	PTPRM	Receptor-type tyrosine-protein phosphatase mu
25.6242	23.2206	Q9NRW1-2	Q9NRW1-2;Q9NRW1	RAB6B_HUMAN	RAB6B	Isoform of Q9NRW1, Isoform 2 of Ras-related protein Rab-6B
25.6254	25.0578	Q9Y592	A0A338VFC5;Q9Y592-2;Q9Y592	CEP83_HUMAN	CEP83	Centrosomal protein of 83 kDa
25.6276	28.0543	H3BPS8	H3BPS8	H3BPS8_HUMAN	ALDOA	Isoform of P04075, fructose-bisphosphate aldolase (Fragment)
25.6277	24.4601	F8WCM5;P01308	C9JNR5;A6XGL2;P01308;F8WCM5	INSR2_HUMAN;INS_HUMAN	INS;INS-IGF2	Insulin, isoform 2
25.6283	25.4642	Q96SW2;Q96SW2-2	Q96SW2-2;A0A1W2PPJ5;J3QT87;Q96SW2	CRBN_HUMAN	CRBN	Protein cereblon
25.6292	25.0596	Q5TKA1-3	C9J5J4;H0Y322;H7C4T7;Q5TKA1-2;Q5TKA1-3;Q5TKA1	LIN9_HUMAN	LIN9	Isoform of Q5TKA1, Isoform 3 of Protein lin-9 homolog
25.6295	23.2584	O94925	B7Z509;O94925	GLSK_HUMAN	GLS	Glutaminase kidney isoform, mitochondrial
25.6302	22.359	Q86VP3;Q86VP3-2;Q86VP3-4	Q86VP3-2;Q86VP3-4;F8VW41;A0A8I5KQA5;Q86VP3	PACS2_HUMAN	PACS2	Phosphofurin acidic cluster sorting protein 2
25.6305	24.7342	O43808	F8WEC6;F8WE74;B1AHN4;F8WA85;O43808	PM34_HUMAN	SLC25A17	Peroxisomal membrane protein PMP34
25.6327	29.1014	H3BRZ1	H3BRZ1	H3BRZ1_HUMAN	MVD	Isoform of P53602, Mevalonate diphosphate decarboxylase
25.6367	26.4979	Q96BD5;Q96BD5-2;Q96BD5-3	H0YEK2;H0YCM5;Q96BD5-2;Q96BD5-3;Q96BD5	PF21A_HUMAN	PHF21A	PHD finger protein 21A
25.6371	25.0132	Q00537	A0A0A0MSJ6;Q00537-2;F5H6Z0;Q07002-3;Q07002;Q00537	CDK17_HUMAN	CDK17	Cyclin-dependent kinase 17
25.6379	24.236	Q969E4	Q969E4;Q5H9L2	TCAL3_HUMAN	TCEAL3	Transcription elongation factor A protein-like 3
25.6417	25.8792	Q9UPZ3	G3V159;Q9UPZ3-2;Q9UPZ3	HPS5_HUMAN	HPS5	BLOC-2 complex member HPS5
25.6426	24.0232	Q68DK2;Q68DK2-2	Q68DK2-2;Q68DK2-5;G3V2D8;A0A7I2YQU3;A0A7I2YQV0;A0A7I2V403;A0A7I2V4E6;Q68DK2	ZFY26_HUMAN	ZFYVE26	Zinc finger FYVE domain-containing protein 26
25.6436	28.0159	Q13445	K7EIN4;K7EQ63;Q13445	TMED1_HUMAN	TMED1	Transmembrane emp24 domain-containing protein 1
25.6442	23.523	Q8N4C8	Q8N4C8-2;Q8N4C8-3;Q8N4C8	MINK1_HUMAN	MINK1	Misshapen-like kinase 1
25.6451	28.1183	O00479	O00479	HMGN4_HUMAN	HMGN4	High mobility group nucleosome-binding domain-containing protein 4
25.6469	26.5191	O15321;O15321-2	E9PS99;E9PQY7;E9PL78;E9PMQ9;E9PJM1;E9PJC4;O15321-2;E9PSI1;O15321	TM9S1_HUMAN	TM9SF1	Transmembrane 9 superfamily member 1
25.6475	23.8978	Q86TN4;Q86TN4-4	H0YGY9;Q86TN4-2;Q86TN4-3;Q86TN4-4;F5H8A0;F5H6B6;F5H1K3;Q86TN4	TRPT1_HUMAN	TRPT1	tRNA 2'-phosphotransferase 1
25.6513	21.6622	Q8NBK3;Q8NBK3-5	E9PF05;Q8NBK3-2;Q8NBK3-4;Q8NBK3-5;Q8NBK3	SUMF1_HUMAN	SUMF1	Formylglycine-generating enzyme
25.6537	24.8358	Q9GZX9	J3QS03;Q9GZX9	TWSG1_HUMAN	TWSG1	Twisted gastrulation protein homolog 1
25.6563	26.2881	Q3KR37;Q3KR37-2;Q3KR37-4	A0A2R8Y5X2;A0A1B0GUD6;A0A1B0GWG7;Q3KR37-2;Q3KR37-3;Q3KR37-4;A0A024R3M2;Q3KR37	ASTRB_HUMAN	GRAMD1B	Protein Aster-B
25.6569	20.2702	P05413	S4R371;P05413	FABPH_HUMAN	FABP3	Fatty acid-binding protein, heart
25.6571	24.5951	Q9BSU3	Q9BSU3	NAA11_HUMAN	NAA11	N-alpha-acetyltransferase 11
25.6578	24.9979	Q92551	Q92551-2;Q92551	IP6K1_HUMAN	IP6K1	Inositol hexakisphosphate kinase 1
25.658	24.1175	Q9Y2G5	A0A0C4DGX7;Q9Y2G5-1;Q9Y2G5-2;H7C2T5;Q9Y2G5	OFUT2_HUMAN	POFUT2	GDP-fucose protein O-fucosyltransferase 2
25.6582	23.364	Q96LB3	Q96LB3	IFT74_HUMAN	IFT74	Intraflagellar transport protein 74 homolog
25.6594	21.0465	A0A7I2YQV8	A0A7I2YQV8	A0A7I2YQV8_HUMAN	SYNCRIP	Isoform of O60506, Synaptotagmin binding cytoplasmic RNA interacting protein
25.6601	25.5628	Q96JN8;Q96JN8-2	Q96JN8-2;K7EPS7;I3L2Z9;I3L2W2;I3L100;Q96JN8	NEUL4_HUMAN	NEURL4	Neuralized-like protein 4
25.6624	23.5858	Q8NB14	A0A804HIT0;Q8NB14	UBP38_HUMAN	USP38	Ubiquitin carboxyl-terminal hydrolase 38
25.6633	24.0588	Q96DE0;Q96DE0-3	Q96DE0-3;Q96DE0	NUD16_HUMAN	NUDT16	U8 snoRNA-decapping enzyme
25.6636	23.4002	P14621	F8WA34;E9PF46;U3KPX1;P14621	ACYP2_HUMAN	ACYP2	Acylphosphatase-2
25.6656	25.9295	Q8IUH3;Q8IUH3-3	H7BZE0;H7C476;Q8IUH3-3;Q8IUH3	RBM45_HUMAN	RBM45	RNA-binding protein 45
25.6672	24.784	Q96RQ1	F8VUZ2;F8VR88;F8W0R1;F8VPA6;Q96RQ1	ERGI2_HUMAN	ERGIC2	Endoplasmic reticulum-Golgi intermediate compartment protein 2
25.6678	25.8008	O43293	O43293	DAPK3_HUMAN	DAPK3	Death-associated protein kinase 3
25.6692	25.7993	Q07954	Q07954	LRP1_HUMAN	LRP1	Prolow-density lipoprotein receptor-related protein 1
25.6722	25.2291	Q9BV73	H7C0P0;Q9BV73-2;Q9BV73	CP250_HUMAN	CEP250	Centrosome-associated protein CEP250
25.6736	26.3924	Q86X27;Q86X27-3	A0A0A0MR31;Q86X27-2;Q86X27-3;Q86X27	RGPS2_HUMAN	RALGPS2	Ras-specific guanine nucleotide-releasing factor RalGPS2
25.6744	22.908	Q96SL8	Q96SL8	FIZ1_HUMAN	FIZ1	Flt3-interacting zinc finger protein 1
25.6752	25.8807	Q9GZM5	E7EQR8;D6RFI3;H0Y9A1;Q9GZM5	YIPF3_HUMAN	YIPF3	Protein YIPF3
25.68	24.662	Q9H2Y7	H3BSS6;H3BNX5;Q9H2Y7	ZN106_HUMAN	ZNF106	Zinc finger protein 106
25.6806	25.7719	Q86V40	C9IYB5;Q86V40-2;Q86V40	TIKI1_HUMAN	TRABD2A	Metalloprotease TIKI1
25.6809	25.1805	Q96G01;Q96G01-3;Q96G01-4	A8MVZ6;Q96G01-3;Q96G01-4;Q96G01	BICD1_HUMAN	BICD1	Protein bicaudal D homolog 1
25.6827	24.7732	Q7Z6B0;Q7Z6B0-2;Q7Z6B0-3	Q7Z6B0-2;Q7Z6B0-3;A0A0A0MTP0;F5GWB1;Q7Z6B0	CCD91_HUMAN	CCDC91	Coiled-coil domain-containing protein 91
25.6856	25.5183	O00458	O00458-2;A0A6Q8PFA5;A0A6Q8PH75;A0A6Q8PF03;A0A6Q8PHN0;C9JNM6;C9JA65;E9PMY4;A0A6Q8PHD2;O00458	IFRD1_HUMAN	IFRD1	Interferon-related developmental regulator 1
25.6871	25.3602	Q9Y2K1;Q9Y2K1-2	Q9Y2K1-2;Q9Y2K1	ZBTB1_HUMAN	ZBTB1	Zinc finger and BTB domain-containing protein 1
25.6883	25.2334	Q8NB91	C9J5X9;A0A8Q3WLR5;A0A8Q3WL66;A0A8Q3WL55;A0A8Q3SIN2;A0A8Q3SJA8;Q8NB91	FANCB_HUMAN	FANCB	Fanconi anemia group B protein
25.6894	24.4324	Q9H063	E9PSH4;E9PR76;Q9H063	MAF1_HUMAN	MAF1	Repressor of RNA polymerase III transcription MAF1 homolog
25.6895	24.5903	P15336;P15336-5	P15336-2;P15336-4;P15336-5;E9PBF9;B8ZZU6;H7C2N6;P15336	ATF2_HUMAN	ATF2	Cyclic AMP-dependent transcription factor ATF-2
25.6905	25.1361	P17029	E9PC66;B3KRF7;P17029	ZKSC1_HUMAN	ZKSCAN1	Zinc finger protein with KRAB and SCAN domains 1
25.6905	24.1217	P32519;P32519-2	A0A0U1RRL5;P32519-2;P32519	ELF1_HUMAN	ELF1	ETS-related transcription factor Elf-1
25.691	25.9523	Q9NVX7;Q9NVX7-2	A0A075B6T4;Q9NVX7-2;E9PQ38;E9PL18;Q9NVX7	KBTB4_HUMAN	KBTBD4	Kelch repeat and BTB domain-containing protein 4
25.6931	24.4576	Q92610	Q92610	ZN592_HUMAN	ZNF592	Zinc finger protein 592
25.6933	26.4286	Q7Z2K8	Q7Z2K8-2;Q7Z2K8	GRIN1_HUMAN	GPRIN1	G protein-regulated inducer of neurite outgrowth 1
25.6938	22.7559	Q96A19	Q96A19	C102A_HUMAN	CCDC102A	Coiled-coil domain-containing protein 102A
25.6951	24.2938	O94806	F8WBA3;H0Y5M6;O94806;Q15139	KPCD3_HUMAN	PRKD3	Serine/threonine-protein kinase D3
25.6998	19.2189	Q6ZW31;Q6ZW31-2	Q6ZW31-2;Q6ZW31	SYDE1_HUMAN	SYDE1	Rho GTPase-activating protein SYDE1
25.7027	24.5316	P19532	P19532	TFE3_HUMAN	TFE3	Transcription factor E3
25.7054	24.0562	Q99523	Q99523-2;Q99523	SORT_HUMAN	SORT1	Sortilin
25.7058	22.4798	Q96JM7;Q96JM7-2	Q96JM7-2;Q96JM7	LMBL3_HUMAN	L3MBTL3	Lethal(3)malignant brain tumor-like protein 3
25.7095	24.9375	Q9NXR5	Q9NXR5	ANR10_HUMAN	ANKRD10	Ankyrin repeat domain-containing protein 10
25.7108	22.9473	O43292	E9PPZ9;E9PLV6;O43292-2;A0A994J7N7;A0A994J7A1;A0A994J6W5;A0A994J6W8;A0A994J6X1;A0A994J6I4;A0A994J6I9;A0A994J5D7;A0A994J4X7;A0A994J4Q3;A0A994J4D0;A0A994J3Y5;A0A994J3Y9;A0A994J3Z2;A0A994J3S1;A0A994J3S5;O43292	GPAA1_HUMAN	GPAA1	Glycosylphosphatidylinositol anchor attachment 1 protein
25.7109	21.6256	Q9NQA3	A0A7I2YQU6;C4AMC7;A8K0Z3;Q6VEQ5;Q9NQA3;A8MWX3	WASH6_HUMAN	WASH6P	WAS protein family homolog 6
25.7145	25.7343	O95084	E9PRR2;O95084-2;O95084	PRS23_HUMAN	PRSS23	Serine protease 23
25.7161	26.2023	Q01831	E7EUB5;Q01831	XPC_HUMAN	XPC	DNA repair protein complementing XP-C cells
25.7167	24.1603	Q9BTF0	Q9BTF0	THUM2_HUMAN	THUMPD2	THUMP domain-containing protein 2
25.7173	27.7346	O75380	O75380	NDUS6_HUMAN	NDUFS6	NADH dehydrogenase [ubiquinone] iron-sulfur protein 6, mitochondrial
25.7186	25.0078	Q9C086	C9JKY0;B8ZZH7;B8ZZ93;H7C171;F8WCL7;J3KQ70;Q9C086	IN80B_HUMAN	INO80B	INO80 complex subunit B
25.7191	26.2195	P20336	S4R3Q3;P20336	RAB3A_HUMAN	RAB3A	Ras-related protein Rab-3A
25.7216	21.6981	Q8IUC6	Q8IUC6	TCAM1_HUMAN	TICAM1	TIR domain-containing adapter molecule 1
25.7223	25.9273	Q13636	J3QR51;Q13636	RAB31_HUMAN	RAB31	Ras-related protein Rab-31
25.725	24.6696	Q6PKC3;Q6PKC3-2	Q6PKC3-2;I3L0Q4;Q6PKC3	TXD11_HUMAN	TXNDC11	Thioredoxin domain-containing protein 11
25.7311	22.5729	Q8NBM8	D6R9J0;Q8NBM8	PCYXL_HUMAN	PCYOX1L	Prenylcysteine oxidase-like
25.7315	21.7495	Q7Z3K6;Q7Z3K6-2;Q7Z3K6-3	Q7Z3K6-2;Q7Z3K6-3;Q7Z3K6-4;A0A087WZA4;Q8N344;Q7Z3K6	MIER3_HUMAN	MIER3	Mesoderm induction early response protein 3
25.7333	24.8966	Q9HB09	A0A0X9JZX1;A0A120HB06;Q9HB09-2;Q9HB09-3;A0A0X8AXX1;A0A0X8ASA9;A0A0X8AT33;A0A0X8AT42;A0A109PLW1;M0R1K0;M0R1Z8;M0QZM6;A0A087WSV0;Q9HB09	B2L12_HUMAN	BCL2L12	Bcl-2-like protein 12
25.7334	24.3279	Q8NC44	H7C3D5;Q8NC44	RETR2_HUMAN	RETREG2	Reticulophagy regulator 2
25.7343	25.2216	Q8WVC6	A0A8J9G8Q5;Q8WVC6-2;K7ESP4;A0A8I5KT67;Q8WVC6	DCAKD_HUMAN	DCAKD	Dephospho-CoA kinase domain-containing protein
25.7407	24.522	P54646	P54646	AAPK2_HUMAN	PRKAA2	5'-AMP-activated protein kinase catalytic subunit alpha-2
25.7426	24.0882	Q5TCZ1;Q5TCZ1-3	Q5TCZ1-2;Q5TCZ1-3;Q5TCZ1	SPD2A_HUMAN	SH3PXD2A	SH3 and PX domain-containing protein 2A
25.7445	25.7431	P16219	E9PE82;P16219	ACADS_HUMAN	ACADS	Short-chain specific acyl-CoA dehydrogenase, mitochondrial
25.7455	27.5345	Q01484;Q01484-2;Q01484-5	A0A0U1RQN6;I6L894;D6RHE1;B7Z651;Q01484-2;Q01484-5;H0Y933;A0A5F9ZH03;A0A5F9ZH10;A0A5F9ZH17;A0A5F9ZH18;A0A5F9ZH19;A0A5F9ZGS5;A0A5F9ZGS7;A0A5F9ZH30;A0A5F9ZH34;A0A5F9ZH35;A0A5F9ZH38;A0A5F9ZH39;A0A5F9ZH58;A0A5F9ZH70;A0A5F9ZHJ6;A0A5F9ZHJ4;A0A5F9ZHL3;A0A5F9ZHL5;A0A5F9ZHL9;A0A5F9ZHM6;A0A5F9ZHN0;A0A5F9ZHN5;A0A5F9ZI08;A0A5F9ZI15;A0A5F9ZI16;A0A5F9ZI18;A0A5F9ZHQ3;A0A5F9ZHQ5;A0A5F9ZHR2;A0A5F9ZHR8;A0A5F9ZI30;A…	ANK2_HUMAN	ANK2	Ankyrin-2
25.7483	23.202	A0AVF1;A0AVF1-3	A0AVF1-2;A0AVF1-3;B7Z2T3;A0AVF1	IFT56_HUMAN	IFT56	Intraflagellar transport protein 56
25.7491	25.3828	O75928;O75928-2	A0A0A0MS92;K7EJT4;K7ER97;A0A087WUY7;O75928-2;O75928-3;O75928	PIAS2_HUMAN	PIAS2	E3 SUMO-protein ligase PIAS2
25.7508	23.6553	Q8TBF4	F8VXY6;G3V1V1;Q8TBF4	ZCRB1_HUMAN	ZCRB1	Zinc finger CCHC-type and RNA-binding motif-containing protein 1
25.7515	26.6465	Q8TD55	Q8TD55-2;C9J4A7;Q8TD55	PKHO2_HUMAN	PLEKHO2	Pleckstrin homology domain-containing family O member 2
25.7543	25.3003	Q9Y6J0;Q9Y6J0-2	B5MEB3;Q9Y6J0-2;A0A087WWW8;Q9Y6J0	CABIN_HUMAN	CABIN1	Calcineurin-binding protein cabin-1
25.755	23.8305	P47736-4	J3KPC5;X6R8W7;P47736-2;P47736-3;P47736-4;F2Z357;P47736	RPGP1_HUMAN	RAP1GAP	Isoform of P47736, Isoform 4 of Rap1 GTPase-activating protein 1
25.7572	25.1554	Q92828	Q92828	COR2A_HUMAN	CORO2A	Coronin-2A
25.7575	23.2931	Q16670	Q16670-2;B4DMT1;A0A024RCN4;A0A087X2F1;Q16670	ZSC26_HUMAN	ZSCAN26	Zinc finger and SCAN domain-containing protein 26
25.7615	26.5853	Q9NW81;Q9NW81-4;Q9NW81-5	Q9NW81-4;Q9NW81-5;Q9NW81	DMAC2_HUMAN	DMAC2	Distal membrane-arm assembly complex protein 2
25.7638	24.5262	P30047	H0YNM1;P30047	GFRP_HUMAN	GCHFR	GTP cyclohydrolase 1 feedback regulatory protein
25.7661	27.5554	Q9Y6N5	H3BNX3;Q9Y6N5	SQOR_HUMAN	SQOR	Sulfide:quinone oxidoreductase, mitochondrial
25.7681	20.1182	Q8TF68	Q8TF68-2;Q8TF68-3;R4GMR4;A0A804HJE2;Q8TF68	ZN384_HUMAN	ZNF384	Zinc finger protein 384
25.7691	24.9019	P06400	A0A3B3IS71;P06400	RB_HUMAN	RB1	Retinoblastoma-associated protein
25.7691	26.1667	Q9HB21	Q9HB21-2;Q5RGS4;Q9HB21	PKHA1_HUMAN	PLEKHA1	Pleckstrin homology domain-containing family A member 1
25.7703	22.5918	Q96NL6	A0A494C0G8;Q96NL6	SCLT1_HUMAN	SCLT1	Sodium channel and clathrin linker 1
25.7704	25.6632	Q86VV8;Q86VV8-3	J3KT00;A0A1W2PPP3;Q86VV8-3;Q86VV8-4;A0A7I2V670;Q86VV8	RTTN_HUMAN	RTTN	Rotatin
25.7728	24.8451	Q6MZP7	Q6MZP7-3;Q6MZP7	LIN54_HUMAN	LIN54	Protein lin-54 homolog
25.773	27.0274	Q9UHW5;Q9UHW5-2	Q9UHW5-2;S4R3M7;Q9UHW5	GPN3_HUMAN	GPN3	GPN-loop GTPase 3
25.7752	27.3526	P52739;P52739-2	P52739-2;P52739	ZN131_HUMAN	ZNF131	Zinc finger protein 131
25.7759	24.5647	Q5TA50	Q5TA50	CPTP_HUMAN	CPTP	Ceramide-1-phosphate transfer protein
25.7763	22.4165	Q6STE5;Q6STE5-2	Q6STE5-2;Q6STE5	SMRD3_HUMAN	SMARCD3	SWI/SNF-related matrix-associated actin-dependent regulator of chromatin subfamily D member 3
25.7789	23.1397	Q9Y5J5	Q9Y5J5	PHLA3_HUMAN	PHLDA3	Pleckstrin homology-like domain family A member 3
25.7803	25.2988	Q9UPR3	Q9UPR3	SMG5_HUMAN	SMG5	Nonsense-mediated mRNA decay factor SMG5
25.7807	24.2865	Q96Q42	J3KQ43;J3KQ33;A0A0S2Z5I4;A0A0S2Z5Q7;A0A7P0T9K3;A0A7P0T9P3;A0A7P0T9R1;A0A7P0T9U5;A0A7P0T9V4;A0A7P0T8F3;A0A7P0T8P3;A0A7P0T958;A0A7P0T8R1;A0A7P0T8T2;A0A7P0T951;A0A7P0T8W6;A0A7P0T976;A0A7P0T980;A0A7P0T813;A0A7P0TBB0;A0A7P0TAH8;A0A7P0TAM1;A0A7P0Z4I4;A0A7P0Z4J9;A0A7P0Z4M6;A0A7P0Z499;A0A7P0Z4F3;Q96Q42-2;Q96Q42-3;Q96Q42	ALS2_HUMAN	ALS2	Alsin
25.783	26.1638	Q8N9V3;Q8N9V3-2	B8ZZF2;Q8N9V3-2;Q8N9V3	WSDU1_HUMAN	WDSUB1	WD repeat, SAM and U-box domain-containing protein 1
25.7854	25.3518	P02452	P02452	CO1A1_HUMAN	COL1A1	Collagen alpha-1(I) chain
25.7893	27.4477	Q9NZC9	H7BYI2;A0A8V8TLD4;Q9NZC9	SMAL1_HUMAN	SMARCAL1	SWI/SNF-related matrix-associated actin-dependent regulator of chromatin subfamily A-like protein 1
25.7919	24.4482	Q8TAD8	Q8TAD8	SNIP1_HUMAN	SNIP1	Smad nuclear-interacting protein 1
25.7921	25.0847	Q92539	A0A8V8TM42;A0A8V8TLW1;Q92539	LPIN2_HUMAN	LPIN2	Phosphatidate phosphatase LPIN2
25.7923	23.3592	Q9H4P4;Q9H4P4-2	Q9H4P4-2;Q9H4P4	RNF41_HUMAN	RNF41	E3 ubiquitin-protein ligase NRDP1
25.794	27.7894	P29323;P29323-2;P29323-3	P29323-2;P29323-3;B1AKC9;P29323	EPHB2_HUMAN	EPHB2	Ephrin type-B receptor 2
25.7958	25.3775	Q92613	Q92613	JADE3_HUMAN	JADE3	Protein Jade-3
25.7964	25.9648	Q76FK4;Q76FK4-4	Q76FK4-2;Q76FK4-4;F8WE42;F5GWN9;F5H101;Q76FK4	NOL8_HUMAN	NOL8	Nucleolar protein 8
25.7991	24.5142	P30530;P30530-2	M0R0W6;P30530-2;P30530	UFO_HUMAN	AXL	Tyrosine-protein kinase receptor UFO
25.8007	24.2046	Q8N6Q8	H0YIN2;Q8N6Q8	MET25_HUMAN	METTL25	Probable methyltransferase-like protein 25
25.8031	24.6692	Q5T2D3	Q5T2D3	OTUD3_HUMAN	OTUD3	OTU domain-containing protein 3
25.8042	23.9906	P62745	P62745	RHOB_HUMAN	RHOB	Rho-related GTP-binding protein RhoB
25.8045	24.1471	O75462	A0A804HI12;M0QZL6;O75462	CRLF1_HUMAN	CRLF1	Cytokine receptor-like factor 1
25.8059	NaN	Q5U3C3	F6RZ86;Q5U3C3-2;Q5U3C3	TM164_HUMAN	TMEM164	Transmembrane protein 164
25.8087	25.283	O95140	A0A6Q8PFJ4;A0A6Q8PGA3;A0A6Q8PGS9;A0A6Q8PGV8;A0A6Q8PGR2;O95140	MFN2_HUMAN	MFN2	Mitofusin-2
25.8089	25.0665	Q8WYN0	Q8WYN0-3;Q8WYN0-5;A0A0A0MT61;H7BYM2;G5E979;Q8WYN0	ATG4A_HUMAN	ATG4A	Cysteine protease ATG4A
25.8094	26.0174	Q9Y4X0	A0A7P0T8F5;A0A7P0T9C2;A0A7P0TAX1;A0A7P0Z454;Q9Y4X0-3;Q9Y4X0-4;A0A8I5KSJ4;Q9Y4X0;Q6DCA0	AMMR1_HUMAN	AMMECR1	Nuclear protein AMMECR1
25.81	25.7322	Q9BX63	A0A804HJU1;A0A804HK62;A0A804HJY1;A0A804HJV4;A0A804HKS0;A0A804HL36;Q9BX63-2;J3QKX0;Q9BX63	FANCJ_HUMAN	BRIP1	Fanconi anemia group J protein
25.8102	25.8398	Q9BW83;Q9BW83-2	Q9BW83-2;Q9BW83	IFT27_HUMAN	IFT27	Intraflagellar transport protein 27 homolog
25.8107	26.1377	Q9UI95	B1AK43;B1AK44;B1AK45;A0A8V8TKV6;Q9UI95	MD2L2_HUMAN	MAD2L2	Mitotic spindle assembly checkpoint protein MAD2B
25.8115	19.3685	A0A994J7H4	A0A994J7H4	A0A994J7H4_HUMAN	NPLOC4	Isoform of Q8TAT6, NPL4 homolog, ubiquitin recognition factor
25.8137	24.8352	Q8N8Z6	Q8N8Z6-2;Q8N8Z6	DCBD1_HUMAN	DCBLD1	Discoidin, CUB and LCCL domain-containing protein 1
25.8141	24.8653	Q14766;Q14766-4	E7EV71;Q14766-2;Q14766-3;Q14766-4;Q14766-5;H7C0I7;Q14766	LTBP1_HUMAN	LTBP1	Latent-transforming growth factor beta-binding protein 1
25.8142	24.5981	O60890	A0A7P0T9G2;A0A7P0T9W4;A0A7P0T8V5;A0A7P0TBH4;A0A7P0Z4E9;O60890	OPHN1_HUMAN	OPHN1	Oligophrenin-1
25.8143	24.3189	O43674;O43674-2	E7EWP0;H0Y886;O43674-2;O43674	NDUB5_HUMAN	NDUFB5	NADH dehydrogenase [ubiquinone] 1 beta subcomplex subunit 5, mitochondrial
25.8143	24.6217	O15119;O15119-2;O15119-3	O15119-2;O15119-3;O15119	TBX3_HUMAN	TBX3	T-box transcription factor TBX3
25.8154	24.9361	Q6PJW8	Q6PJW8-2;Q6PJW8	CNST_HUMAN	CNST	Consortin
25.8179	25.5062	Q9P287-2	Q9P287-2	BCCIP_HUMAN	BCCIP	Isoform of Q9P287, Isoform 2 of BRCA2 and CDKN1A-interacting protein
25.819	26.268	P84157	P84157-2;P84157-3;P84157	MXRA7_HUMAN	MXRA7	Matrix-remodeling-associated protein 7
25.8234	25.6281	A8CG34	A8CG34-2;Q96HA1-2;Q96HA1-3;Q96HA1;A6NF01;A8CG34	P121C_HUMAN	POM121C	Nuclear envelope pore membrane protein POM 121C
25.8257	24.4295	Q13332;Q13332-2;Q13332-3;Q13332-4;Q13332-6	Q13332-2;Q13332-3;Q13332-4;Q13332-6;Q13332	PTPRS_HUMAN	PTPRS	Receptor-type tyrosine-protein phosphatase S
25.8258	22.1956	Q96EH3	Q96EH3	MASU1_HUMAN	MALSU1	Mitochondrial assembly of ribosomal large subunit protein 1
25.8282	25.8028	P54259	P54259	ATN1_HUMAN	ATN1	Atrophin-1
25.8311	25.4953	O15078	J3KNF5;A0A6Q8PG44;A0A6Q8PGB1;A0A6Q8PGC3;A0A6Q8PGP6;A0A6Q8PH24;A0A6Q8PH78;A0A6Q8PEZ6;A0A5F9ZHU6;A0A5K1VW81;S4R322;O15078	CE290_HUMAN	CEP290	Centrosomal protein of 290 kDa
25.832	23.2875	Q96EC8	Q96EC8	YIPF6_HUMAN	YIPF6	Protein YIPF6
25.8354	22.7169	Q9HA47;Q9HA47-3;Q9HA47-4	G3V170;Q9HA47-2;Q9HA47-3;Q9HA47-4;Q9HA47	UCK1_HUMAN	UCK1	Uridine-cytidine kinase 1
25.8384	25.2136	Q68CQ7	Q68CQ7	GL8D1_HUMAN	GLT8D1	Glycosyltransferase 8 domain-containing protein 1
25.8388	26.1483	Q9NX04	V9GYI2;V9GYN4;V9GYQ8;V9GY35;Q9NX04	AIRIM_HUMAN	AIRIM	AFG2-interacting ribosome maturation factor
25.839	26.1671	Q9Y4D7	Q9Y4D7-2;H0YAM9;H0YAB2;Q9Y4D7	PLXD1_HUMAN	PLXND1	Plexin-D1
25.8413	26.3389	Q5T8P6-3	Q5T8P6-3;Q5T8P6-4;Q5T8P6-5;A0A087X0H9	RBM26_HUMAN	RBM26	Isoform of Q5T8P6, Isoform 3 of RNA-binding protein 26
25.8418	26.0764	P30408	F8WF27;F8WBG6;P30408	T4S1_HUMAN	TM4SF1	Transmembrane 4 L6 family member 1
25.8429	24.8165	Q6Q0C0;Q6Q0C0-2	Q6Q0C0-2;A0A994J4N1;Q6Q0C0	TRAF7_HUMAN	TRAF7	E3 ubiquitin-protein ligase TRAF7
25.8445	22.7397	Q99501	A0A5E8;Q99501	GA2L1_HUMAN	GAS2L1	GAS2-like protein 1
25.8461	26.4334	Q86YB8	A0A8I5KWQ1;Q86YB8	ERO1B_HUMAN	ERO1B	ERO1-like protein beta
25.8466	20.9373	O60879;O60879-2;O60879-3	O60879-2;O60879-3;O60879	DIAP2_HUMAN	DIAPH2	Protein diaphanous homolog 2
25.8469	NaN	P27701;P27701-2	E9PJC7;P27701-2;P27701	CD82_HUMAN	CD82	CD82 antigen
25.848	24.8772	Q8NFG4	Q8NFG4	FLCN_HUMAN	FLCN	Folliculin
25.8498	25.7621	Q15004	H0YMA4;H0YKX3;A0A0U1RQM0;Q15004	PAF15_HUMAN	PCLAF	PCNA-associated factor
25.8509	NaN	Q17RN3	Q17RN3	FA98C_HUMAN	FAM98C	Protein FAM98C
25.851	23.2872	Q6MZQ0	Q6MZQ0-3;Q6MZQ0	PRR5L_HUMAN	PRR5L	Proline-rich protein 5-like
25.8533	25.152	Q13084	Q4TT37;A2IDC6;A2IDC7;Q13084	RM28_HUMAN	MRPL28	Large ribosomal subunit protein bL28m
25.8537	25.8318	P23434	H3BUH9;A0A1W2PQV2;P23434	GCSH_HUMAN	GCSH	Glycine cleavage system H protein, mitochondrial
25.8555	25.7859	Q9Y343;Q9Y343-2	A8MXB7;Q9Y343-2;H0YA25;Q9Y343	SNX24_HUMAN	SNX24	Sorting nexin-24
25.8558	25.1891	Q13045-2	J3KS54;Q13045-2	FLII_HUMAN	FLII	Isoform of Q13045, Isoform 2 of Protein flightless-1 homolog
25.8562	26.0069	Q6IQ26;Q6IQ26-2	A0A7P0T9H0;A0A7P0T9Z2;A0A7P0T8L1;A0A7P0T8L8;B4DFB6;A0A7P0TAA7;A0A7P0TAF6;A0A7P0TAH5;Q6IQ26-2;A0A7P0Z4N9;Q6IQ26	DEN5A_HUMAN	DENND5A	DENN domain-containing protein 5A
25.857	22.7412	Q6NUT3;Q6NUT3-2;Q6NUT3-3;Q6NUT3-4	Q6NUT3-2;Q6NUT3-3;Q6NUT3-4;K7EJS5;Q6NUT3	MFS12_HUMAN	MFSD12	Major facilitator superfamily domain-containing protein 12
25.8576	24.0537	O60331;O60331-2;O60331-3;O60331-4	O60331-2;O60331-3;O60331-4;A0A7P0T808;O60331	PI51C_HUMAN	PIP5K1C	Phosphatidylinositol 4-phosphate 5-kinase type-1 gamma
25.8578	24.3352	P17544;P17544-2;P17544-4	P17544-1;P17544-2;P17544-3;P17544-4;P17544	ATF7_HUMAN	ATF7	Cyclic AMP-dependent transcription factor ATF-7
25.8583	27.22	O00338;O00338-2	B4DLP0;O00338-2;B8ZZF7;O00338	ST1C2_HUMAN	SULT1C2	Sulfotransferase 1C2
25.8592	26.1179	Q8WV22	H3BSL0;H3BR73;I3L1I3;Q8WV22	NSE1_HUMAN	NSMCE1	Non-structural maintenance of chromosomes element 1 homolog
25.8601	24.8563	Q92508	Q92508	PIEZ1_HUMAN	PIEZO1	Piezo-type mechanosensitive ion channel component 1
25.861	24.0843	Q9BX95	Q9BX95	SGPP1_HUMAN	SGPP1	Sphingosine-1-phosphate phosphatase 1
25.8615	26.4035	O75381;O75381-2	O75381-2;O75381	PEX14_HUMAN	PEX14	Peroxisomal membrane protein PEX14
25.8641	25.9022	P32456	P32456	GBP2_HUMAN	GBP2	Guanylate-binding protein 2
25.8646	26.8631	Q8IUC4;Q8IUC4-2	Q8IUC4-2;Q8IUC4;A8MT19	RHPN2_HUMAN	RHPN2	Rhophilin-2
25.8704	27.4274	Q9UHQ4;Q9UHQ4-2	C9IYK6;F8WB99;C9JTE9;Q9UHQ4-2;C9JGJ9;H7C5E2;A0A669KBH7;A0A669KAY5;A0A669KB27;Q9UHQ4	BAP29_HUMAN	BCAP29	B-cell receptor-associated protein 29
25.8704	26.0947	Q9Y6M9	E9PH64;A0A7I2V620;Q9Y6M9	NDUB9_HUMAN	NDUFB9	NADH dehydrogenase [ubiquinone] 1 beta subcomplex subunit 9
25.8709	24.9525	Q9P2E3	Q5JXR5;Q5JXR6;Q5JXR7;Q9P2E3-2;Q9P2E3	ZNFX1_HUMAN	ZNFX1	NFX1-type zinc finger-containing protein 1
25.8709	26.5542	Q9HC98;Q9HC98-2;Q9HC98-3;Q9HC98-4	Q5TBG7;Q5TBH1;Q5TBH2;Q5TBG1;Q5TBG2;Q5TBG4;Q9HC98-2;Q9HC98-3;Q9HC98-4;Q9HC98	NEK6_HUMAN	NEK6	Serine/threonine-protein kinase Nek6
25.8736	26.0502	Q9BYC8	Q9BYC8	RM32_HUMAN	MRPL32	Large ribosomal subunit protein bL32m
25.8749	25.2008	Q9UBK7-2;Q9UNT1-2	Q9UNT1-2;Q9UNT1-3;E7EWW3;B7ZBD4;Q9UBK7-2;Q9UBK7-3;F2Z2T3;F2Z3J7;Q9UBK7;Q9UNT1	RBL2A_HUMAN;RBL2B_HUMAN	RABL2A;RABL2B	Isoform of Q9UBK7, Isoform 2 of Rab-like protein 2A
25.8755	24.5628	Q9BRQ0	Q9BRQ0	PYGO2_HUMAN	PYGO2	Pygopus homolog 2
25.8756	24.977	P27986;P27986-4	A0A8V8TME9;A0A8V8TMF4;A0A8V8TL10;A0A8V8TL14;A0A8V8TL31;A0A8V8TLF1;A0A8V8TLF7;B3KWZ7;P27986-2;P27986-3;P27986-4;P27986-5;E5RHI0;P27986	P85A_HUMAN	PIK3R1	Phosphatidylinositol 3-kinase regulatory subunit alpha
25.8756	26.8222	Q9Y5Z9;Q9Y5Z9-2	Q9Y5Z9-2;Q9Y5Z9	UBIA1_HUMAN	UBIAD1	UbiA prenyltransferase domain-containing protein 1
25.8767	24.1307	P53677	E5RJ52;P53677	AP3M2_HUMAN	AP3M2	AP-3 complex subunit mu-2
25.8789	24.6225	P55347;P55347-2	E7EPN6;P55347-2;P55347	PKNX1_HUMAN	PKNOX1	Homeobox protein PKNOX1
25.8805	27.1357	C9JUM1	C9JUM1	C9JUM1_HUMAN	ACTB	Isoform of P60709, Actin beta (Fragment)
25.8834	24.1899	Q9BXK1	A0A087WWX5;Q9BXK1	KLF16_HUMAN	KLF16	Krueppel-like factor 16
25.8847	23.3295	Q6N043;Q6N043-2;Q6N043-3	Q6N043-2;Q6N043-3;Q6N043-6;H0YN90;H0YLA6;H0YL38;Q6N043	Z280D_HUMAN	ZNF280D	Zinc finger protein 280D
25.8847	26.1257	O94919	O94919	ENDD1_HUMAN	ENDOD1	Endonuclease domain-containing 1 protein
25.8855	23.3125	Q86SX3;Q86SX3-2;Q86SX3-6	C9IYA4;C9J6B2;C9J317;C9K0G6;Q86SX3-2;Q86SX3-3;Q86SX3-5;Q86SX3-6;Q86SX3	TEDC1_HUMAN	TEDC1	Tubulin epsilon and delta complex protein 1
25.8866	26.2521	O43187	O43187	IRAK2_HUMAN	IRAK2	Interleukin-1 receptor-associated kinase-like 2
25.89	25.0583	P54277;P54277-3	P54277-2;P54277-4;P54277-3;E9PC65;Q5FBZ9;B7ZAA0;Q3BDU3;P54277	PMS1_HUMAN	PMS1	PMS1 protein homolog 1
25.8905	25.3741	O95544	O95544-2;O95544-3;J3KTI3;A0A0A0MR98;O95544	NADK_HUMAN	NADK	NAD kinase
25.892	24.8789	Q06190	Q06190-2;Q06190-3;Q06190	P2R3A_HUMAN	PPP2R3A	Serine/threonine-protein phosphatase 2A regulatory subunit B'' subunit alpha
25.8932	20.9493	Q8N5L8	Q8N5L8	RP25L_HUMAN	RPP25L	Ribonuclease P protein subunit p25-like protein
25.8961	22.9892	O43759;O43759-2	O43759-2;O43759-3;B5MCD7;O43759	SNG1_HUMAN	SYNGR1	Synaptogyrin-1
25.8967	25.6074	Q5JPI9	A0A494BZY7;H3BQF6;Q5JPI9	EFMT2_HUMAN	EEF1AKMT2	EEF1A lysine methyltransferase 2
25.8972	28.3365	Q9ULW3	Q9ULW3	ABT1_HUMAN	ABT1	Activator of basal transcription 1
25.8992	25.3196	Q8N7C3;Q8N7C3-2	J3KNI5;Q8N7C3-2;A0A804HJA0;Q8N7C3	TRIMM_HUMAN	TRIML2	Probable E3 ubiquitin-protein ligase TRIML2
25.9001	22.3149	O94991	O94991-2;O94991	SLIK5_HUMAN	SLITRK5	SLIT and NTRK-like protein 5
25.9014	25.4193	Q9HAW4;Q9HAW4-3	E7ESG2;Q9HAW4-2;Q9HAW4-3;Q9HAW4	CLSPN_HUMAN	CLSPN	Claspin
25.9037	24.4304	Q8NBR6;Q8NBR6-2	J3KNL7;H0YM15;Q8NBR6-2;Q8NBR6	MINY2_HUMAN	MINDY2	Ubiquitin carboxyl-terminal hydrolase MINDY-2
25.9047	24.4679	Q9C029	Q9C029-3;Q9C029-4;Q9C029	TRIM7_HUMAN	TRIM7	E3 ubiquitin-protein ligase TRIM7
25.9053	25.7251	Q86T82;Q86T82-2	Q86T82-2;Q86T82	UBP37_HUMAN	USP37	Ubiquitin carboxyl-terminal hydrolase 37
25.9058	22.4958	O15431	O15431	COPT1_HUMAN	SLC31A1	High affinity copper uptake protein 1
25.9068	22.4913	O43505	O43505	B4GA1_HUMAN	B4GAT1	Beta-1,4-glucuronyltransferase 1
25.9097	23.6309	Q6ZUM4;Q6ZUM4-2	A0A0G2JRC1;A0A0G2JRG8;A0A0G2JNY3;E9PNT2;E9PNX6;E9PIR1;A0A8I5KVA8;Q6ZUM4-2;Q6ZUM4	RHG27_HUMAN	ARHGAP27	Rho GTPase-activating protein 27
25.9101	25.1517	O00470	H0YNY8;U3KPR8;O00470	MEIS1_HUMAN	MEIS1	Homeobox protein Meis1
25.9102	20.5181	Q53ET0	Q53ET0	CRTC2_HUMAN	CRTC2	CREB-regulated transcription coactivator 2
25.9104	26.8255	Q96PY5	C9IZY8;Q96PY5-3;Q96PY5	FMNL2_HUMAN	FMNL2	Formin-like protein 2
25.9132	24.4891	Q96FV2	J3KT79;Q96FV2-2;J3QL71;J3QR84;J3QRJ1;Q96FV2	SCRN2_HUMAN	SCRN2	Secernin-2
25.9137	21.9045	Q8WUP2;Q8WUP2-2;Q8WUP2-3	E7EWE8;Q8WUP2-2;Q8WUP2-3;Q8WUP2	FBLI1_HUMAN	FBLIM1	Filamin-binding LIM protein 1
25.9148	17.3949	P0DI83	P0DI83;A0A1B0GTQ2;A0A1B0GWB1;A0A1C7CYW6	NARR_HUMAN	RAB34	Isoform of Q9BZG1, Ras-related protein Rab-34, isoform NARR
25.9152	NaN	Q5VU43-4	Q5VU43-3;Q5VU43-4;A0A075B749;H0YCY0;A0A8Q3WM32;A0A8Q3SI83;A0A8Q3SI21;A0A994J5E0;A0A087WX83;Q5VU43	MYOME_HUMAN	PDE4DIP	Isoform of Q5VU43, Isoform 4 of Myomegalin
25.9169	26.0809	Q9Y6M7-13;Q9Y6M7-6	Q9Y6M7-2;Q9Y6M7-4;Q9Y6M7-5;Q9Y6M7-6;Q9Y6M7-7;Q9Y6M7-8;Q9Y6M7-9;A0A0A0MST8;H7C3C4;E9PFN4;Q9Y6M7-12;Q9Y6M7-13;Q9Y6M7	S4A7_HUMAN	SLC4A7	Isoform of Q9Y6M7, Isoform 13 of Sodium bicarbonate cotransporter 3
25.9186	25.4723	Q9P275	A0A075B784;A0A8I5QJW4;Q8IXW9;E9PEW0;K7ELR5;K7ELT3;K7EPT1;K7EQS0;K7ERC1;Q9P275	UBP36_HUMAN	USP36	Ubiquitin carboxyl-terminal hydrolase 36
25.9193	22.3012	P51790;P51790-4;P51790-5	E9PE15;P51790-2;P51790-4;P51790-5;P51790	CLCN3_HUMAN	CLCN3	H(+)/Cl(-) exchange transporter 3
25.9224	23.7235	O15213	O15213	WDR46_HUMAN	WDR46	WD repeat-containing protein 46
25.9238	25.972	Q9H8W4	Q9H8W4	PKHF2_HUMAN	PLEKHF2	Pleckstrin homology domain-containing family F member 2
25.9241	24.9092	Q5VV52;Q5VV52-3	Q5VV52-3;Q5VV50;Q5VV52	ZN691_HUMAN	ZNF691	Zinc finger protein 691
25.9245	22.7094	Q96Q83	E9PRJ2;E9PRD0;E9PSA5;E9PN35;Q96Q83-2;Q96Q83	ALKB3_HUMAN	ALKBH3	Alpha-ketoglutarate-dependent dioxygenase alkB homolog 3
25.9262	25.2799	Q5ST30;Q5ST30-4	B7ZL25;B4E0K6;A0A140T8Y0;A0A0A0MTG1;Q5ST30-3;Q5ST30-4;A0A140TA35;A0A140TA36;A0A140TA40;A0A140TA45;A0A0G2JL52;A0A0G2JIA5;Q5ST30	SYVM_HUMAN	VARS2	Valine--tRNA ligase, mitochondrial
25.9274	21.1752	Q5SXM8	Q5SXM7;Q5SXM8	DNLZ_HUMAN	DNLZ	DNL-type zinc finger protein
25.9279	24.5063	Q9BY12	H3BT27;H3BS25;H3BPM0;Q9BY12-3;Q9BY12	SCAPE_HUMAN	SCAPER	S phase cyclin A-associated protein in the endoplasmic reticulum
25.928	27.3273	Q9BVW5	H3BU04;Q9BVW5	TIPIN_HUMAN	TIPIN	TIMELESS-interacting protein
25.9306	25.7117	Q15771	H0YDK7;E9PS06;E9PMJ1;Q15771	RAB30_HUMAN	RAB30	Ras-related protein Rab-30
25.9336	26.7976	Q9H6L5;Q9H6L5-2	H0Y9U4;A0A804HHX5;A0A804HJ37;A0A804HJI9;A0A804HKW5;A0A804HKT1;Q9H6L5-2;Q9H6L5	RETR1_HUMAN	RETREG1	Reticulophagy regulator 1
25.9351	23.5511	Q96EN9;Q96EN9-3	Q96EN9-3;Q96EN9	REX1B_HUMAN	REX1BD	Required for excision 1-B domain-containing protein
25.9357	25.9731	Q8TD30	Q8TD30-2;Q8TD30	ALAT2_HUMAN	GPT2	Alanine aminotransferase 2
25.9365	25.8792	O75665;O75665-3	A6NF31;O75665-2;O75665-3;A0A804HHU8;A0A804HIZ6;A0A804HK70;A0A804HL42;O75665	OFD1_HUMAN	OFD1	Centriole and centriolar satellite protein OFD1
25.9367	25.8903	Q969Q5	D6RFW3;F8W8H5;Q969Q5	RAB24_HUMAN	RAB24	Ras-related protein Rab-24
25.9387	25.3167	Q9Y4E5;Q9Y4E5-2	Q9Y4E5-2;E9PH99;Q9Y4E5	ZN451_HUMAN	ZNF451	E3 SUMO-protein ligase ZNF451
25.9409	23.9958	Q96PE2	Q96PE2	ARHGH_HUMAN	ARHGEF17	Rho guanine nucleotide exchange factor 17
25.9413	26.7952	Q15269	Q15269	PWP2_HUMAN	PWP2	Periodic tryptophan protein 2 homolog
25.9456	25.5511	O95365	O95365	ZBT7A_HUMAN	ZBTB7A	Zinc finger and BTB domain-containing protein 7A
25.946	26.3842	Q00013;Q00013-2;Q00013-3	A8MTH1;Q00013-2;Q00013-3;Q00013	EM55_HUMAN	MPP1	55 kDa erythrocyte membrane protein
25.9469	26.5432	Q96QB1-6	Q96QB1-1;Q96QB1-6;Q9Y3M8-2;Q9Y3M8-4;Q9Y3M8-5;H3BRG5;Q96QB1;Q9Y3M8	RHG07_HUMAN	DLC1	Isoform of Q96QB1, Isoform 6 of Rho GTPase-activating protein 7
25.9475	26.4314	Q8NFW8	Q8NFW8	NEUA_HUMAN	CMAS	N-acylneuraminate cytidylyltransferase
25.9482	25.9536	Q6ZNB6	Q6ZNB6	NFXL1_HUMAN	NFXL1	NF-X1-type zinc finger protein NFXL1
25.9502	25.1813	Q8NE01	Q8NE01-3;Q8NE01-2;Q8NE01	CNNM3_HUMAN	CNNM3	Metal transporter CNNM3
25.9524	23.4938	O95169;O95169-3	O95169-2;O95169-3;E9PQ68;K9J7I2;O95169	NDUB8_HUMAN	NDUFB8	NADH dehydrogenase [ubiquinone] 1 beta subcomplex subunit 8, mitochondrial
25.9526	23.9471	O75157;O75157-2	O75157-2;O75157	T22D2_HUMAN	TSC22D2	TSC22 domain family protein 2
25.9545	25.5346	O00423;O00423-3	O00423-3;F8W717;A0A3B3IU69;O00423	EMAL1_HUMAN	EML1	Echinoderm microtubule-associated protein-like 1
25.9556	24.71	Q9NPF0	M0R100;Q9NPF0	CD320_HUMAN	CD320	CD320 antigen
25.9568	24.7889	Q9BSQ5;Q9BSQ5-2;Q9BSQ5-4	C9JUH3;A0A0A0MT72;Q9BSQ5-2;Q9BSQ5-3;Q9BSQ5-4;E9PEC4;A0A3B3IRS0;Q9BSQ5	CCM2_HUMAN	CCM2	Cerebral cavernous malformations 2 protein
25.9571	24.5612	Q5T8I3;Q5T8I3-2	Q5T8I3-2;Q5T8I3	EEIG2_HUMAN	EEIG2	EEIG family member 2
25.9576	26.3448	P32856;P32856-2;P32856-3	P32856-2;P32856-3;A0A994J7R2;A0A994J5V9;P32856	STX2_HUMAN	STX2	Syntaxin-2
25.9584	25.3136	O00400	H7C562;O00400	ACATN_HUMAN	SLC33A1	Acetyl-coenzyme A transporter 1
25.9585	NaN	Q5VWQ0	A0A0C4DH79;Q5VWQ0-4;A0A087WWP8;Q5VWQ0	RSBN1_HUMAN	RSBN1	Lysine-specific demethylase 9
25.9588	25.3745	Q5T9A4	Q5T9A4-3;A0A5K1VW56;J3QSF3;Q5T2N8;Q5T9A4	ATD3B_HUMAN	ATAD3B	ATPase family AAA domain-containing protein 3B
25.9599	25.6776	Q96KC2	Q96KC2	ARL5B_HUMAN	ARL5B	ADP-ribosylation factor-like protein 5B
25.9608	23.0051	P62068;P62068-3;P62068-4	P62068-2;P62068-3;P62068-4;H7BZK6;O75317;P62068	UBP46_HUMAN	USP46	Ubiquitin carboxyl-terminal hydrolase 46
25.965	23.6204	Q9Y4C4	Q9Y4C4	MFHA1_HUMAN	MFHAS1	Malignant fibrous histiocytoma-amplified sequence 1
25.9659	25.308	Q12893	Q12893	TM115_HUMAN	TMEM115	Transmembrane protein 115
25.9671	25.8947	Q16649	Q16649	NFIL3_HUMAN	NFIL3	Nuclear factor interleukin-3-regulated protein
25.9682	24.6657	P17050	P17050	NAGAB_HUMAN	NAGA	Alpha-N-acetylgalactosaminidase
25.9698	28.2762	A6NKT7	J3KNE0;J3KQ37;A0A286YES2;F8VYC4;A0A8Q3SIN4;A0A8Q3SII4;A0A8Q3SII5;A6NKT7;O14715;P0DJD1;P0DJD0;Q99666	RGPD3_HUMAN	RGPD3	RanBP2-like and GRIP domain-containing protein 3
25.9731	24.011	O94979-7	D6REX3;H0Y9V3;O94979-7;H7BXG7	SC31A_HUMAN	SEC31A	Isoform of O94979, Isoform 7 of Protein transport protein Sec31A
25.9733	23.8226	Q9NWK9	Q9NWK9	BCD1_HUMAN	ZNHIT6	Box C/D snoRNA protein 1
25.974	23.431	Q9C035;Q9C035-2;Q9C035-3;Q9C035-4	Q9C035-2;Q9C035-3;Q9C035-4;Q9C035	TRIM5_HUMAN	TRIM5	Tripartite motif-containing protein 5
25.9748	25.7085	Q99640;Q99640-3	B4DZM6;A6NHV6;I3L4K3;I3L3P0;I3L1H7;I3L136;Q99640-2;Q99640-3;Q99640	PMYT1_HUMAN	PKMYT1	Membrane-associated tyrosine- and threonine-specific cdc2-inhibitory kinase
25.9755	25.3117	Q8N8R7	E9PRK7;Q8N8R7	AL14E_HUMAN	ARL14EP	ARL14 effector protein
25.9758	22.2451	O43310-2	O43310-2	CTIF_HUMAN	CTIF	Isoform of O43310, Isoform 2 of CBP80/20-dependent translation initiation factor
25.9761	26.4966	Q9Y303	H3BTZ6;H3BSV9;Q9Y303-2;Q9Y303-3;A0A3B3IU33;H3BQ15;Q9Y303	NAGA_HUMAN	AMDHD2	N-acetylglucosamine-6-phosphate deacetylase
25.9761	26.7133	Q969F1	Q969F1	TF3C6_HUMAN	GTF3C6	General transcription factor 3C polypeptide 6
25.9763	26.5619	Q9UJT0	S4R3K3;Q9UJT0	TBE_HUMAN	TUBE1	Tubulin epsilon chain
25.9766	26.6593	Q9P2N6-3;Q9P2N6-4;Q9P2N6-5	Q9P2N6-2;Q9P2N6-3;Q9P2N6-4;Q9P2N6-5;Q9P2N6-6;Q9P2N6-8;A0A590UJ53;Q9P2N6	KANL3_HUMAN	KANSL3	Isoform of Q9P2N6, Isoform 3 of KAT8 regulatory NSL complex subunit 3
25.9806	25.9656	Q3MIT2	Q3MIT2	PUS10_HUMAN	PUS10	tRNA pseudouridine synthase Pus10
25.9817	27.9508	Q71U36-2	F8VWV9;F8VX09;F8VQQ4;F8VRZ4;F8VRK0;Q71U36-2	TBA1A_HUMAN	TUBA1A	Isoform of Q71U36, Isoform 2 of Tubulin alpha-1A chain
25.9862	26.1368	Q8N2F6;Q8N2F6-2;Q8N2F6-3;Q8N2F6-4	C9J5N7;H7BXQ8;Q8N2F6-2;Q8N2F6-3;Q8N2F6-4;Q8N2F6-5;Q8N2F6-6;Q8N2F6	ARM10_HUMAN	ARMC10	Armadillo repeat-containing protein 10
25.9867	26.8493	Q96EL3	B9A051;Q96EL3	RM53_HUMAN	MRPL53	Large ribosomal subunit protein mL53
25.9879	23.891	Q06136	Q06136-2;K7ERC8;Q06136	KDSR_HUMAN	KDSR	3-ketodihydrosphingosine reductase
25.9881	24.7321	P01040	C9J0E4;P01040	CYTA_HUMAN	CSTA	Cystatin-A
25.99	23.7641	Q9NRW3	Q9NRW3	ABC3C_HUMAN	APOBEC3C	DNA dC->dU-editing enzyme APOBEC-3C
25.9918	26.2895	Q8IXI1	H3BST5;A0A8V8TM48;I3L2C6;Q8IXI1	MIRO2_HUMAN	RHOT2	Mitochondrial Rho GTPase 2
25.993	27.2107	Q13015	Q13015	AF1Q_HUMAN	MLLT11	Protein AF1q
25.9954	22.9236	P17028	P17028	ZNF24_HUMAN	ZNF24	Zinc finger protein 24
25.996	26.0467	Q9ULJ3	Q9ULJ3-2;Q9ULJ3	ZBT21_HUMAN	ZBTB21	Zinc finger and BTB domain-containing protein 21
25.9967	23.2795	O95455	O95455	TGDS_HUMAN	TGDS	dTDP-D-glucose 4,6-dehydratase
25.9981	26.0967	Q9NZN5-2	Q9NZN5-2;E9PMR6;Q9NZN5	ARHGC_HUMAN	ARHGEF12	Isoform of Q9NZN5, Isoform 2 of Rho guanine nucleotide exchange factor 12
25.9988	25.0112	Q499Z4	Q499Z4	ZN672_HUMAN	ZNF672	Zinc finger protein 672
25.9991	21.3918	Q14050	Q14050	CO9A3_HUMAN	COL9A3	Collagen alpha-3(IX) chain
25.9999	25.6248	Q9Y6A9	C9JBL1;A0A5F9YFS9;Q9Y6A9	SPCS1_HUMAN	SPCS1	Signal peptidase complex subunit 1
26	24.946	A0A096LP07;A0A096LPJ3;A8K070	A0A096LP07;A0A096LPJ3;A8K070	A0A096LP07_HUMAN;A0A096LPJ3_HUMAN;A8K070_HUMAN	GPS1	Isoform of Q13098, G protein pathway suppressor 1
26	27.0857	O14832	C9IYS5;C9JR86;B1ALH6;O14832-2;O14832	PAHX_HUMAN	PHYH	Phytanoyl-CoA dioxygenase, peroxisomal
26.0004	26.4667	Q3KRA6	Q3KRA6	CB076_HUMAN	C2orf76	UPF0538 protein C2orf76
26.0013	24.2487	Q14689;Q14689-6	A0A494C143;Q14689-6;Q14689	DIP2A_HUMAN	DIP2A	Disco-interacting protein 2 homolog A
26.0037	25.7401	P23511;P23511-2	P23511-2;P23511	NFYA_HUMAN	NFYA	Nuclear transcription factor Y subunit alpha
26.0045	26.5664	Q495W5;Q495W5-2	Q495W5-2;Q495W5	FUT11_HUMAN	FUT11	Alpha-(1,3)-fucosyltransferase 11
26.0061	26.2551	Q9Y4C1	Q9Y4C1	KDM3A_HUMAN	KDM3A	Lysine-specific demethylase 3A
26.0081	26.4487	Q6FIF0;Q6FIF0-2	Q6FIF0-2;Q6FIF0	ZFAN6_HUMAN	ZFAND6	AN1-type zinc finger protein 6
26.0089	26.79	P60604	P60604-2;P60604	UB2G2_HUMAN	UBE2G2	Ubiquitin-conjugating enzyme E2 G2
26.0091	24.8221	Q15149-3	Q15149-3	PLEC_HUMAN	PLEC	Isoform of Q15149, Isoform 3 of Plectin
26.0092	26.5088	Q9BY41;Q9BY41-4	A6NGJ7;A6NFW1;E7EVA8;Q9BY41-4;Q9BY41-5;Q9BY41-6;A6NMT1;A0A3B3IRZ0;A0A3B3IRZ8;A0A3B3IRP8;A0A3B3IS68;A0A3B3ISJ4;A0A3B3IT04;A0A3B3ISE4;A0A3B3IT30;A0A3B3ISS7;A0A3B3IT84;A0A3B3IT95;A0A3B3IU01;A0A3B3IU62;A0A3B3ITZ3;A0A3B3IRI9;A0A3B3IRV1;Q9BY41	HDAC8_HUMAN	HDAC8	Histone deacetylase 8
26.0106	27.0222	P02655	Q6P163;K7ER74;P02655	APOC2_HUMAN	APOC2	Apolipoprotein C-II
26.0107	25.2382	Q7Z7C8;Q7Z7C8-2	A0A8I5QL44;B4DZU5;Q7Z7C8-2;Q7Z7C8-4;A0A8I5KTT0;A0A8I5KVM3;Q7Z7C8	TAF8_HUMAN	TAF8	Transcription initiation factor TFIID subunit 8
26.0125	26.3803	P11474	F5H0E9;P11474	ERR1_HUMAN	ESRRA	Steroid hormone receptor ERR1
26.0127	22.2941	Q8NBZ0	J3KNE2;H3BNM4;Q8NBZ0	IN80E_HUMAN	INO80E	INO80 complex subunit E
26.0128	26.5145	Q53H12	E9PC15;E9PG39;A0A3B3ISZ0;A0A3B3ISY9;A0A3B3ITD0;A0A0G2JLG5;A0A0G2JLD0;Q53H12	AGK_HUMAN	AGK	Acylglycerol kinase, mitochondrial
26.0146	24.394	Q9NVR0	Q9NVR0	KLH11_HUMAN	KLHL11	Kelch-like protein 11
26.0158	26.4737	Q7LG56;Q7LG56-6	H0YAV1;Q7LG56-5;Q7LG56-6;Q7LG56	RIR2B_HUMAN	RRM2B	Ribonucleoside-diphosphate reductase subunit M2 B
26.0174	24.8666	Q9C0H2;Q9C0H2-2;Q9C0H2-3	Q9C0H2-2;Q9C0H2-3;Q9C0H2	TTYH3_HUMAN	TTYH3	Protein tweety homolog 3
26.0178	22.736	Q9Y2C2	Q9Y2C2	UST_HUMAN	UST	Uronyl 2-sulfotransferase
26.0185	27.17	O95263;O95263-4	O95263-2;O95263-4;O95263-6;A0A2R8Y4E6;O95263	PDE8B_HUMAN	PDE8B	High affinity cAMP-specific and IBMX-insensitive 3',5'-cyclic phosphodiesterase 8B
26.0197	23.3278	Q8N4T8	H0Y962;Q8N4T8-2;Q8N4T8	CBR4_HUMAN	CBR4	3-oxoacyl-[acyl-carrier-protein] reductase
26.0225	25.9194	Q86YT6	Q86YT6	MIB1_HUMAN	MIB1	E3 ubiquitin-protein ligase MIB1
26.0228	23.8574	Q92569;Q92569-2;Q92569-3	Q92569-2;Q92569-3;F6TDL0;Q92569	P55G_HUMAN	PIK3R3	Phosphatidylinositol 3-kinase regulatory subunit gamma
26.023	26.1693	Q8N2Z9	Q8N2Z9	CENPS_HUMAN	CENPS	Centromere protein S
26.0249	26.3012	Q9Y2Z0-2	Q9Y2Z0-2	SGT1_HUMAN	SUGT1	Isoform of Q9Y2Z0, Isoform 2 of Protein SGT1 homolog
26.0267	25.9679	P46821	P46821	MAP1B_HUMAN	MAP1B	Microtubule-associated protein 1B
26.0267	24.1674	Q7Z6J9	J9JIH8;A0A7P0TA59;A0A7P0Z413;E7EN92;Q7Z6J9	SEN54_HUMAN	TSEN54	tRNA-splicing endonuclease subunit Sen54
26.0293	24.3309	Q8IYS2;Q8IYS2-2	Q8IYS2-2;Q8IYS2	K2013_HUMAN	KIAA2013	Uncharacterized protein KIAA2013
26.0294	25.9493	K7EM38	K7EM38	K7EM38_HUMAN	ACTG1	Isoform of P63261, Actin, cytoplasmic 2 (Fragment)
26.0297	26.0666	P28290;P28290-2	P28290-2;P28290-3;E7EUL7;E9PHV5;P28290	ITPI2_HUMAN	ITPRID2	Protein ITPRID2
26.0314	24.8704	P10588	A0A8V8TQQ6;A0A8V8TPV3;F1DAL9;F1DAL7;P24468-2;P24468-3;P10589;P10588;P24468	NR2F6_HUMAN	NR2F6	Nuclear receptor subfamily 2 group F member 6
26.0317	26.919	Q96CM8;Q96CM8-2;Q96CM8-3	Q96CM8-2;Q96CM8-3;Q96CM8-4;E9PF16;Q96CM8	ACSF2_HUMAN	ACSF2	Medium-chain acyl-CoA ligase ACSF2, mitochondrial
26.0343	26.5221	Q8IZ07	H0YIN8;Q8IZ07	AN13A_HUMAN	ANKRD13A	Ankyrin repeat domain-containing protein 13A
26.0352	24.6368	Q7Z5L9-2	Q7Z5L9-2	I2BP2_HUMAN	IRF2BP2	Isoform of Q7Z5L9, Isoform 2 of Interferon regulatory factor 2-binding protein 2
26.0362	26.7598	Q96AQ6;Q96AQ6-2	Q96AQ6-2;Q96AQ6	PBIP1_HUMAN	PBXIP1	Pre-B-cell leukemia transcription factor-interacting protein 1
26.0372	26.9148	Q9H3K2	Q9H3K2	GHITM_HUMAN	GHITM	Growth hormone-inducible transmembrane protein
26.0376	26.7394	Q9BW61	Q9BW61	DDA1_HUMAN	DDA1	DET1- and DDB1-associated protein 1
26.0402	25.6872	Q9H061	E9PI90;Q9H061	T126A_HUMAN	TMEM126A	Transmembrane protein 126A
26.0427	24.7432	Q9NZ71;Q9NZ71-2;Q9NZ71-6;Q9NZ71-7	Q9NZ71-2;Q9NZ71-4;Q9NZ71-6;Q9NZ71-7;Q9NZ71-8;Q9NZ71-9;X6RBZ7;A0A0C4DGC7;Q9NZ71	RTEL1_HUMAN	RTEL1	Regulator of telomere elongation helicase 1
26.0439	22.8562	Q8NCD3;Q8NCD3-2;Q8NCD3-3	C9JWC4;Q8NCD3-2;Q8NCD3-3;Q8NCD3	HJURP_HUMAN	HJURP	Holliday junction recognition protein
26.0443	25.8919	Q15170	Q15170	TCAL1_HUMAN	TCEAL1	Transcription elongation factor A protein-like 1
26.0458	24.7351	Q99442	F8WF48;F8WCJ7;Q99442	SEC62_HUMAN	SEC62	Translocation protein SEC62
26.0459	24.568	Q9H8T0;Q9H8T0-2	Q9H8T0-2;Q9H8T0	AKTIP_HUMAN	AKTIP	AKT-interacting protein
26.0461	26.7799	Q13438;Q13438-2;Q13438-5;Q13438-6;Q13438-7	Q13438-2;Q13438-3;Q13438-4;Q13438-5;Q13438-6;Q13438-7;Q13438-8;B4E321;A0A8V8TRD7;A0A8V8TRE0;A0A8V8TPZ4;A0A8V8TQI0;A0A8V8TQI2;A0A8V8TQI4;A0A8V8TQI8;A0A8V8TQI9;A0A8V8TR31;A0A8V8TR34;A0A8V8TQ04;Q13438	OS9_HUMAN	OS9	Protein OS-9
26.0463	25.6116	Q12857;Q12857-3;Q12857-4	Q12857-2;Q12857-3;Q12857-4;A0A590UK38;A0A590UJU2;A0A590UK09;A0A8V8TQG7;A0A8V8TQI3;A0A8V8TQV0;A0A8V8TPG7;A0A8V8TPN0;A0A8V8TP49;B1AKN5;B1AKN6;B1AKN7;B1AKN8;S4R3K5;S4R3W2;Q12857	NFIA_HUMAN	NFIA	Nuclear factor 1 A-type
26.0467	26.03	O00311	O00311	CDC7_HUMAN	CDC7	Cell division cycle 7-related protein kinase
26.0472	24.5098	Q9H8M7	Q9H8M7-2;Q9H8M7	MINY3_HUMAN	MINDY3	Ubiquitin carboxyl-terminal hydrolase MINDY-3
26.05	26.2502	Q96GJ1;Q96GJ1-2	Q96GJ1-2;Q96GJ1	TRM2B_HUMAN	TRMT2B	tRNA (uracil-5-)-methyltransferase homolog B
26.0529	25.8843	O75528;O75528-2	O75528-2;C9JMS0;O75528	TADA3_HUMAN	TADA3	Transcriptional adapter 3
26.054	26.429	Q9H6X2;Q9H6X2-5	H0YC24;A0A7P0T9B0;Q9H6X2-2;Q9H6X2-3;Q9H6X2-4;Q9H6X2-5;Q9H6X2-6;A0A7P0Z463;Q9H6X2	ANTR1_HUMAN	ANTXR1	Anthrax toxin receptor 1
26.0572	26.5229	Q9Y3A4	Q9Y3A4	RRP7A_HUMAN	RRP7A	Ribosomal RNA-processing protein 7 homolog A
26.0624	25.9982	P52895	P52895-2;B4DK69;S4R3P0;Q04828;P52895	AK1C2_HUMAN	AKR1C2	Aldo-keto reductase family 1 member C2
26.0668	23.184	O75431;O75431-2	C9JNK6;C9JAZ1;O75431-2;O75431	MTX2_HUMAN	MTX2	Metaxin-2
26.069	21.4702	Q92686	Q92686	NEUG_HUMAN	NRGN	Neurogranin
26.0698	26.9076	Q9NUQ6;Q9NUQ6-2;Q9NUQ6-3;Q9NUQ6-4	B8ZZZ7;Q9NUQ6-2;Q9NUQ6-3;Q9NUQ6-4;Q9NUQ6	SPS2L_HUMAN	SPATS2L	SPATS2-like protein
26.0707	23.9174	Q7Z6I8	H0YAE0;Q7Z6I8-2;Q7Z6I8	CE024_HUMAN	C5orf24	UPF0461 protein C5orf24
26.0723	25.4591	Q86TM6;Q86TM6-2;Q86TM6-3	Q86TM6-2;Q86TM6-3;Q86TM6	SYVN1_HUMAN	SYVN1	E3 ubiquitin-protein ligase synoviolin
26.0726	25.0448	P19827	P19827-2;P19827-3;H7C0N0;P19827	ITIH1_HUMAN	ITIH1	Inter-alpha-trypsin inhibitor heavy chain H1
26.0729	24.7924	Q96S15	A0A499FJD3;A0A3B3ISA1;Q96S15	WDR24_HUMAN	WDR24	GATOR complex protein WDR24
26.0736	25.3508	Q99988	Q99988	GDF15_HUMAN	GDF15	Growth/differentiation factor 15
26.0739	26.8541	Q9P031	F8VNY5;Q9P031	TAP26_HUMAN	CCDC59	Thyroid transcription factor 1-associated protein 26
26.075	25.1159	Q9BUB5;Q9BUB5-2	Q9BUB5-2;Q9BUB5-3;A0A499FJN1;A0A499FIS5;A0A499FJS1;E9PSE0;E9PLE7;E9PN34;E9PMM8;E9PIA0;Q9BUB5	MKNK1_HUMAN	MKNK1	MAP kinase-interacting serine/threonine-protein kinase 1
26.0756	23.2844	Q9BXP2	Q9BXP2	S12A9_HUMAN	SLC12A9	Solute carrier family 12 member 9
26.0757	24.7682	Q9BTV6	Q9BTV6	DPH7_HUMAN	DPH7	Diphthine methyltransferase
26.0774	25.8324	Q9H579-2	Q9H579-2;Q5JYQ9;A0A8V8TLY2	MROH8_HUMAN	MROH8	Isoform of Q9H579, Isoform 2 of Protein MROH8
26.0782	25.3168	P10620;P10620-2	P10620-2;F5H7F6;F5H6X2;P10620	MGST1_HUMAN	MGST1	Microsomal glutathione S-transferase 1
26.0788	25.4554	Q5T9S5;Q5T9S5-2	J3KP97;Q5T9S5-2;H0YCD6;E9PFB9;A0A8I5KUE1;A0A8I5KWA2;Q5T9S5	CCD18_HUMAN	CCDC18	Coiled-coil domain-containing protein 18
26.0791	25.4191	Q9Y5Q0	H0YED5;H0YCN1;E9PS00;E9PKP8;Q9Y5Q0	FADS3_HUMAN	FADS3	Fatty acid desaturase 3
26.0796	27.2641	Q96C57	G5EA44;E7ENF1;F5H7W8;F5H3K2;Q96C57	CSTOS_HUMAN	CUSTOS	Protein CUSTOS
26.08	22.4681	Q5T0D9	Q5T0D9-2;Q5T0D9	TPRGL_HUMAN	TPRG1L	Tumor protein p63-regulated gene 1-like protein
26.0801	23.3034	Q96EX3	Q96EX3	DC2I2_HUMAN	DYNC2I2	Cytoplasmic dynein 2 intermediate chain 2
26.0824	24.066	Q9NXX6	Q9NXX6	NSE4A_HUMAN	NSMCE4A	Non-structural maintenance of chromosomes element 4 homolog A
26.083	23.702	Q17RY0;Q17RY0-2;Q17RY0-3	Q7Z5Q1-3;Q7Z5Q1-4;Q7Z5Q1-5;Q7Z5Q1-6;Q7Z5Q1-7;Q7Z5Q1-8;Q7Z5Q1-9;Q8NE35-2;B7ZLQ8;H0Y9D9;A0A590UJI5;A0A5K1VW93;A0A5K1VW61;A0A5K1VW71;A0A5K1VW79;Q17RY0-2;Q17RY0-3;E5RJM0;E5RFP2;Q7Z5Q1;Q17RY0;Q8NE35	CPEB4_HUMAN	CPEB4	Cytoplasmic polyadenylation element-binding protein 4
26.0833	27.1786	Q7Z7K6;Q7Z7K6-3	Q7Z7K6-3;A0A0M3HER2;Q7Z7K6	CENPV_HUMAN	CENPV	Centromere protein V
26.0839	23.7332	Q9NTG7;Q9NTG7-2	Q9NTG7-2;E9PNA0;E9PM75;E9PN58;E9PK80;Q9NTG7	SIR3_HUMAN	SIRT3	NAD-dependent protein deacetylase sirtuin-3, mitochondrial
26.0861	26.7515	O95299	E7ESZ7;A0A7I2YQU0;A0A087WXC5;A0A7I2V3H5;A0A7I2V594;O95299	NDUAA_HUMAN	NDUFA10	NADH dehydrogenase [ubiquinone] 1 alpha subcomplex subunit 10, mitochondrial
26.0869	25.3965	O60906	O60906	NSMA_HUMAN	SMPD2	Sphingomyelin phosphodiesterase 2
26.0879	24.4336	Q9H967	A0A0C4DFX7;Q9H967	WDR76_HUMAN	WDR76	WD repeat-containing protein 76
26.0918	24.6254	Q92562	Q5TCS4;Q5TCS5;A0A6Q8PFJ3;A0A6Q8PG49;A0A6Q8PG59;A0A6Q8PG61;A0A6Q8PGL0;A0A6Q8PGM1;A0A6Q8PGB4;A0A6Q8PGY4;A0A6Q8PGY7;A0A6Q8PHA1;A0A6Q8PGP4;A0A6Q8PF62;A0A6Q8PF70;A0A6Q8PF86;A0A6Q8PF90;A0A6Q8PHK3;A0A6Q8PHP5;A0A6Q8PHM5;A0A6Q8PHB4;A0A6Q8PHC7;A0A6Q8PHH5;Q92562	FIG4_HUMAN	FIG4	Polyphosphoinositide phosphatase
26.0938	25.9395	P18146	P11161-2;Q06889-2;A0A8I5KYI5;Q06889;P11161;P18146	EGR1_HUMAN	EGR1	Early growth response protein 1
26.0961	29.0559	Q49A26;Q49A26-3	Q49A26-2;Q49A26-3;Q49A26-4;Q49A26-5;K7EMM8;K7EPU6;K7EQB2;Q49A26	GLYR1_HUMAN	GLYR1	Cytokine-like nuclear factor N-PAC
26.098	23.3495	Q969E2;Q969E2-2	Q969E2-2;Q969E2	SCAM4_HUMAN	SCAMP4	Secretory carrier-associated membrane protein 4
26.0983	22.7351	Q16540	Q16540	RM23_HUMAN	MRPL23	Large ribosomal subunit protein uL23m
26.0995	22.1722	Q9NSC7	K7EMB6;G3XAD9;Q9NSC7	SIA7A_HUMAN	ST6GALNAC1	Alpha-N-acetylgalactosaminide alpha-2,6-sialyltransferase 1
26.1008	24.0652	Q6SPF0	E9PIW9;Q6SPF0	SAMD1_HUMAN	SAMD1	Sterile alpha motif domain-containing protein 1
26.1037	23.3788	Q02978	Q02978-2;I3L1P8;Q02978	M2OM_HUMAN	SLC25A11	Mitochondrial 2-oxoglutarate/malate carrier protein
26.1056	25.6891	Q9UN36;Q9UN36-2;Q9UN36-3;Q9UN36-4;Q9UN36-6	H0YJT9;G3V578;Q9UN36-2;Q9UN36-3;Q9UN36-4;Q9UN36-5;Q9UN36-6;Q9UN36	NDRG2_HUMAN	NDRG2	Protein NDRG2
26.1057	26.6726	Q9NX40	D6RIV2;D6RBN5;Q9NX40-4;Q9NX40	OCAD1_HUMAN	OCIAD1	OCIA domain-containing protein 1
26.1058	26.3789	Q9UI42;Q9UI42-2	B7Z5J4;Q9UI42-2;Q9UI42	CBPA4_HUMAN	CPA4	Carboxypeptidase A4
26.1068	23.6584	Q06609;Q06609-3	Q06609-2;Q06609-3;Q06609-4;Q06609	RAD51_HUMAN	RAD51	DNA repair protein RAD51 homolog 1
26.1097	25.3712	Q9NSY0	Q9NSY0-2;Q9NSY0-4;Q9NSY0	NRBP2_HUMAN	NRBP2	Nuclear receptor-binding protein 2
26.11	25.6355	Q9Y6B7	B1ALD0;Q9Y6B7	AP4B1_HUMAN	AP4B1	AP-4 complex subunit beta-1
26.1107	23.152	Q2M3G4	Q2M3G4-2;Q2M3G4	SHRM1_HUMAN	SHROOM1	Protein Shroom1
26.1117	27.558	P34931	V9GZ37;Q53FA3;P0DMV8-2;A0A0G2JIW1;P0DMV9;P0DMV8;P34931	HS71L_HUMAN	HSPA1L	Heat shock 70 kDa protein 1-like
26.1138	26.2285	Q9H6Q4	J3KS48;J3KT43;Q9UHQ1-2;Q9UHQ1-3;Q9UHQ1-4;E7EP87;H3BSH2;E9PH27;Q9H6Q4-3;J3QRB0;Q9UHQ1;Q9H6Q4	CIAO3_HUMAN	CIAO3	Cytosolic iron-sulfur assembly component 3
26.1153	26.8538	Q6ZWJ1	E7EPP7;Q6ZWJ1	STXB4_HUMAN	STXBP4	Syntaxin-binding protein 4
26.1184	26.3591	Q9UKV3-5	G3V3B0;Q9UKV3-5	ACINU_HUMAN	ACIN1	Isoform of Q9UKV3, Isoform 4 of Apoptotic chromatin condensation inducer in the nucleus
26.1202	24.4812	Q7Z4L5	A0A7P0T8P4;A0A7P0T962;A0A7P0TB61;A0A7P0TBE5;A0A7P0TAJ8;A0A494C0N4;H9KV93;Q7Z4L5	TT21B_HUMAN	TTC21B	Tetratricopeptide repeat protein 21B
26.1202	26.0434	Q9Y6J9	Q9Y6J9	TAF6L_HUMAN	TAF6L	TAF6-like RNA polymerase II p300/CBP-associated factor-associated factor 65 kDa subunit 6L
26.1203	25.6696	Q9H6E5	J3KN81;F8WA97;F5H0R1;H3BRB1;Q9H6E5	STPAP_HUMAN	TUT1	Speckle targeted PIP5K1A-regulated poly(A) polymerase
26.1208	25.6542	P50570-5	P50570-2;P50570-5;P50570	DYN2_HUMAN	DNM2	Isoform of P50570, Isoform 5 of Dynamin-2
26.1232	23.3386	Q8IVH8;Q8IVH8-2;Q8IVH8-3	Q8IVH8-2;Q8IVH8-3;F5H5A3;Q8IVH8	M4K3_HUMAN	MAP4K3	Mitogen-activated protein kinase kinase kinase kinase 3
26.1239	26.2669	Q9Y620	Q9Y620	RA54B_HUMAN	RAD54B	DNA repair and recombination protein RAD54B
26.1251	24.1572	Q9C0B5;Q9C0B5-2	Q9C0B5-2;H0YEF4;Q9C0B5	ZDHC5_HUMAN	ZDHHC5	Palmitoyltransferase ZDHHC5
26.1252	24.2554	Q9BZF3-3;Q9BZF3-5	Q9BZF3-2;Q9BZF3-3;Q9BZF3-4;Q9BZF3-5;Q9BZF3	OSBL6_HUMAN	OSBPL6	Isoform of Q9BZF3, Isoform 3 of Oxysterol-binding protein-related protein 6
26.1255	23.8675	Q9Y388	Q9Y388	RBMX2_HUMAN	RBMX2	RNA-binding motif protein, X-linked 2
26.1256	25.7896	P51617;P51617-2;P51617-3	P51617-2;P51617-3;P51617-4;H7C3C1;H7C2I6;H7C224;D3YTB5;P51617	IRAK1_HUMAN	IRAK1	Interleukin-1 receptor-associated kinase 1
26.1281	26.9783	Q8NEY1;Q8NEY1-2;Q8NEY1-3	H0Y6F6;A0A0A0MRJ3;Q8NEY1-2;Q8NEY1-3;Q8NEY1-4;Q8NEY1-5;Q8NEY1-6;Q8NEY1-7;A0A8I5KSE4;Q8NEY1	NAV1_HUMAN	NAV1	Neuron navigator 1
26.134	25.8373	Q68DH5	Q68DH5	LMBD2_HUMAN	LMBRD2	G-protein coupled receptor-associated protein LMBRD2
26.1352	24.2257	Q12834	Q12834	CDC20_HUMAN	CDC20	Cell division cycle protein 20 homolog
26.1357	26.2565	Q69YH5	E9PEI0;Q69YH5	CDCA2_HUMAN	CDCA2	Cell division cycle-associated protein 2
26.138	24.2214	Q8N2G8;Q8N2G8-3	Q8N2G8-2;Q8N2G8-3;K7ESN3;Q8N2G8	GHDC_HUMAN	GHDC	GH3 domain-containing protein
26.1383	25.5996	Q9H0K1	Q9H0K1	SIK2_HUMAN	SIK2	Serine/threonine-protein kinase SIK2
26.1393	26.0905	Q5XPI4	C9J266;C9JS59;Q5XPI4-2;Q5XPI4	RN123_HUMAN	RNF123	E3 ubiquitin-protein ligase RNF123
26.14	22.7077	P16298;P16298-4	P16298-2;P16298-3;P16298-4;Q5F2F8;P16298	PP2BB_HUMAN	PPP3CB	Serine/threonine-protein phosphatase 2B catalytic subunit beta isoform
26.1428	24.9621	P51531;P51531-2	F6VDE0;A0A0U1RQZ9;P51531-2;A0A994HRU5;A0A994J4Z7;P51531	SMCA2_HUMAN	SMARCA2	Probable global transcription activator SNF2L2
26.143	25.2883	Q9UPQ3;Q9UPQ3-2	C9J8Z2;A0A0U1RRF1;E7EUN2;H7C211;H7C0A7;Q9UPQ3-2;Q9UPQ3-3;X5D293;Q9UPQ3	AGAP1_HUMAN	AGAP1	Arf-GAP with GTPase, ANK repeat and PH domain-containing protein 1
26.1447	25.6166	P50747;P50747-2	P50747-2;A0A8C8QSB1;P50747	BPL1_HUMAN	HLCS	Biotin--protein ligase
26.1451	24.4668	Q6PJI9	H3BV71;Q6PJI9-2;Q6PJI9-3;H3BMH3;Q6PJI9	WDR59_HUMAN	WDR59	GATOR complex protein WDR59
26.1474	25.0792	P36952	P36952-2;P36952	SPB5_HUMAN	SERPINB5	Serpin B5
26.1505	27.5028	O95478	H0YAI9;A0A0A0MQZ6;O95478	NSA2_HUMAN	NSA2	Ribosome biogenesis protein NSA2 homolog
26.1508	23.5461	Q9UMX1	Q9UMX1-2;Q9UMX1-3;Q9UMX1	SUFU_HUMAN	SUFU	Suppressor of fused homolog
26.1515	27.3303	O75787;O75787-2	A0A1B0GVB9;A0A1B0GUT7;A0A1B0GV60;A0A1B0GV24;A0A1B0GTB0;A0A1B0GWJ8;A0A1B0GVW0;A0A1B0GW13;B7Z1I9;O75787-2;A0A1C7CYW4;H7C3E1;O75787	RENR_HUMAN	ATP6AP2	Renin receptor
26.1519	25.0132	Q9Y4K4	G3V4T8;A0A804HIS2;Q9Y4K4	M4K5_HUMAN	MAP4K5	Mitogen-activated protein kinase kinase kinase kinase 5
26.152	24.5144	Q9HCL2	Q5VW52;Q9HCL2	GPAT1_HUMAN	GPAM	Glycerol-3-phosphate acyltransferase 1, mitochondrial
26.1547	24.7962	Q9NYJ1;Q9NYJ1-2	Q9NYJ1-2;Q9NYJ1	COA4_HUMAN	COA4	Cytochrome c oxidase assembly factor 4 homolog, mitochondrial
26.1551	26.4593	Q6PD74	H0YL49;Q6PD74-2;Q6PD74	AAGAB_HUMAN	AAGAB	Alpha- and gamma-adaptin-binding protein p34
26.1556	24.3364	Q99720;Q99720-3;Q99720-4	B4DR71;A0A7P0T9D5;A0A7P0TA12;Q99720-3;Q99720-4;A0A7P0Z4C2;Q99720	SGMR1_HUMAN	SIGMAR1	Sigma non-opioid intracellular receptor 1
26.1565	27.3057	Q15006	Q15006	EMC2_HUMAN	EMC2	ER membrane protein complex subunit 2
26.157	19.4907	Q8IVB5	Q8IVB5	LIX1L_HUMAN	LIX1L	LIX1-like protein
26.1594	27.214	Q9P1Y6;Q9P1Y6-3	B7ZM65;F8WEF5;A0A0J9YWD5;A0A0J9YX88;A0A0J9YYB5;E9PJ24;Q9P1Y6-2;Q9P1Y6-3;Q9P1Y6	PHRF1_HUMAN	PHRF1	PHD and RING finger domain-containing protein 1
26.16	24.373	O75122	J3KR49;E3W994;A0A804HJG7;O75122	CLAP2_HUMAN	CLASP2	CLIP-associating protein 2
26.1602	25.1629	Q9BT40;Q9BT40-2	Q9BT40-2;C9JZB0;K7EPG6;I3L2L1;I3L0Y0;Q9BT40	INP5K_HUMAN	INPP5K	Inositol polyphosphate 5-phosphatase K
26.1625	27.114	Q96JB1;Q96JB1-2	A0A075B6F3;H0Y7V4;Q96JB1-2;Q96JB1	DYH8_HUMAN	DNAH8	Dynein axonemal heavy chain 8
26.1628	27.3697	P29317	P29317	EPHA2_HUMAN	EPHA2	Ephrin type-A receptor 2
26.1635	24.349	Q7Z3E5;Q7Z3E5-2	Q7Z3E5-2;A0A804HI20;A0A804HJ95;A0A804HIU9;A0A804HJ52;A0A804HHZ1;A0A804HIH2;H7BZY2;H7BZA2;A0A804HK42;A0A804HK85;A0A804HJI1;A0A804HL13;A0A2Q3DP09;Q7Z3E5	ARMC9_HUMAN	ARMC9	LisH domain-containing protein ARMC9
26.1645	26.6882	Q9NQT8	E7ERX9;F2Z2F9;Q9NQT8	KI13B_HUMAN	KIF13B	Kinesin-like protein KIF13B
26.1671	27.4537	Q93075	H7C1W4;Q93075	TATD2_HUMAN	TATDN2	Putative deoxyribonuclease TATDN2
26.1702	26.8286	Q9H2J7	Q9H2J7-2;F8VSG1;A0A7P0T9P8;A0A7P0T9Z9;A0A7P0T8B7;A0A7P0T8I1;A0A7P0TAT1;A0A7P0TAZ8;A0A7P0TBL2;A0A7P0TA72;A0A7P0TB05;A0A7P0Z4F0;Q9H2J7	S6A15_HUMAN	SLC6A15	Sodium-dependent neutral amino acid transporter B(0)AT2
26.1709	26.6188	O14880	Q5VV89;O14880	MGST3_HUMAN	MGST3	Glutathione S-transferase 3, mitochondrial
26.1723	23.3351	Q9Y2K6	Q9Y2K6	UBP20_HUMAN	USP20	Ubiquitin carboxyl-terminal hydrolase 20
26.1744	24.544	P0C2W1	C9JLC0;P0C2W1	FBSP1_HUMAN	FBXO45	F-box/SPRY domain-containing protein 1
26.1763	23.7708	Q6IPR3	Q6IPR3-2;V9GY40;V9GZ67;Q6IPR3	TYW3_HUMAN	TYW3	tRNA wybutosine-synthesizing protein 3 homolog
26.1765	25.067	Q15262-2;Q15262-3;Q15262-4	Q5TG12;E7EPS8;H0Y6P5;H0Y6V4;A0A0G2JQF6;Q15262-4;Q15262-2;Q15262-3;E9PGC5;P28827-2;P28827;Q15262	PTPRK_HUMAN	PTPRK	Isoform of Q15262, Isoform 2 of Receptor-type tyrosine-protein phosphatase kappa
26.1773	22.1447	P34059	H3BP66;P34059	GALNS_HUMAN	GALNS	N-acetylgalactosamine-6-sulfatase
26.1775	27.5546	E9PJN9	E9PJN9	E9PJN9_HUMAN	RPS3	Isoform of P23396, Ribosomal protein S3 (Fragment)
26.1778	26.2282	Q96CW6	Q96CW6	S7A6O_HUMAN	SLC7A6OS	Probable RNA polymerase II nuclear localization protein SLC7A6OS
26.1783	25.9958	Q86VP1;Q86VP1-2	Q86VP1-2;Q86VP1-3;Q86VP1-4;B8ZZD4;Q86VP1	TAXB1_HUMAN	TAX1BP1	Tax1-binding protein 1
26.1787	24.987	Q9H0R1	E7EQ45;Q9H0R1-2;Q9H0R1	AP5M1_HUMAN	AP5M1	AP-5 complex subunit mu-1
26.1794	26.9248	Q96L93;Q96L93-4;Q96L93-6	Q96L93-2;Q96L93-4;Q96L93-5;Q96L93-6;Q96L93	KI16B_HUMAN	KIF16B	Kinesin-like protein KIF16B
26.1808	22.0412	Q6V0I7;Q6V0I7-3	Q6V0I7-2;Q6V0I7-3;A0A7P0T1I0;A0A6Q8JR05;Q6V0I7	FAT4_HUMAN	FAT4	Protocadherin Fat 4
26.1827	26.3859	Q99549;Q99549-2	A0A0A0MT47;Q99549-2;Q99549	MPP8_HUMAN	MPHOSPH8	M-phase phosphoprotein 8
26.1832	25.2478	Q9BVN2;Q9BVN2-2;Q9BVN2-3;Q9BVN2-4	Q9BVN2-2;Q9BVN2-3;Q9BVN2-4;Q68CX2;A0A8Q3SIT1;A0A087WX95;A0A087WYB2;Q9BVN2	RUSC1_HUMAN	RUSC1	AP-4 complex accessory subunit RUSC1
26.185	25.2957	Q9BXI6;Q9BXI6-2	Q9BXI6-2;F8WCD1;F8W9Y7;B5MD46;H0Y2U5;H7C471;H0Y5R9;H7C1Q1;Q9BXI6	TB10A_HUMAN	TBC1D10A	TBC1 domain family member 10A
26.1913	27.1571	Q9Y5T5;Q9Y5T5-2	Q9Y5T5-2;Q9Y5T5-3;Q9Y5T5-5;Q9Y5T5	UBP16_HUMAN	USP16	Ubiquitin carboxyl-terminal hydrolase 16
26.194	24.6449	Q9NQC1;Q9NQC1-2;Q9NQC1-3	C9J929;B5MBX1;A0A7P0TAP8;Q9NQC1-2;Q9NQC1-3;A0A087X085;G3XAA4;A0A0C4DFT8;Q9NQC1	JADE2_HUMAN	JADE2	E3 ubiquitin-protein ligase Jade-2
26.1996	26.4104	Q86UU1;Q86UU1-2	Q86UU1-2;Q86UU1-3;Q86UU1	PHLB1_HUMAN	PHLDB1	Pleckstrin homology-like domain family B member 1
26.2019	25.9715	P06241-2	P06241-2	FYN_HUMAN	FYN	Isoform of P06241, Isoform 2 of Tyrosine-protein kinase Fyn
26.2031	26.537	Q9NY61	A0A7P0T868;A0A7P0TBI0;A0A7P0TAR0;A0A7P0Z4N2;A0A7P0Z4P2;A0A7P0Z434;A0A087WTH8;A0A087WWS8;Q9NY61	AATF_HUMAN	AATF	Protein AATF
26.2033	24.2896	Q9HCH0	Q9HCH0-2;H7C1V4;Q9HCH0	NCK5L_HUMAN	NCKAP5L	Nck-associated protein 5-like
26.2063	24.6656	Q13164	I3L0J8;Q13164-2;Q13164-3;Q13164-4;Q13164	MK07_HUMAN	MAPK7	Mitogen-activated protein kinase 7
26.2065	24.5967	Q96RY7	Q96RY7	IF140_HUMAN	IFT140	Intraflagellar transport protein 140 homolog
26.2073	24.6933	Q6DHV7;Q6DHV7-2	Q6DHV7-2;Q6DHV7-3;Q6DHV7	ADAL_HUMAN	ADAL	Adenosine deaminase-like protein
26.208	24.6676	Q9NRX5	Q9NRX5	SERC1_HUMAN	SERINC1	Serine incorporator 1
26.2096	25.0273	P18433;P18433-6	P18433-6;P18433	PTPRA_HUMAN	PTPRA	Receptor-type tyrosine-protein phosphatase alpha
26.2099	24.134	Q96FZ7	I3L4A1;Q96FZ7	CHMP6_HUMAN	CHMP6	Charged multivesicular body protein 6
26.2114	26.5812	O75362	O75362	ZN217_HUMAN	ZNF217	Zinc finger protein 217
26.2151	26.1134	Q8NE86;Q8NE86-3	Q8NE86-3;Q8NE86	MCU_HUMAN	MCU	Calcium uniporter protein, mitochondrial
26.2151	24.3942	Q96S79	Q96S79	RSLAB_HUMAN	RASL10B	Ras-like protein family member 10B
26.218	25.4499	Q9P0P8	A0A0D9SEI0;Q9P0P8	MRES1_HUMAN	MTRES1	Mitochondrial transcription rescue factor 1
26.2184	27.2896	P14406	D6RIE3;D6RGV5;H0UI06;P14406	CX7A2_HUMAN	COX7A2	Cytochrome c oxidase subunit 7A2, mitochondrial
26.2187	25.4605	Q9UKG9;Q9UKG9-3	C9J3D7;Q9UKG9-3;Q9UKG9	OCTC_HUMAN	CROT	Peroxisomal carnitine O-octanoyltransferase
26.2192	25.2663	Q96L73;Q96L73-2;Q96L73-3	A0A8I5QJP2;D6RBP3;Q96L73-3;Q96L73-2;Q96L73	NSD1_HUMAN	NSD1	Histone-lysine N-methyltransferase, H3 lysine-36 specific
26.2202	21.7055	Q96LR5	C9J180;F8WF15;F8W8F0;Q96LR5	UB2E2_HUMAN	UBE2E2	Ubiquitin-conjugating enzyme E2 E2
26.2221	25.2688	Q5HYI8	Q5HYI8	RABL3_HUMAN	RABL3	Rab-like protein 3
26.2238	25.6472	Q6NS38	S4R3T5;F5GZZ0;Q6NS38-2;F5H5X2;Q6NS38	ALKB2_HUMAN	ALKBH2	DNA oxidative demethylase ALKBH2
26.2239	26.8773	Q9BWT6	A0A6Q8PFL9;A0A6Q8PF18;A0A6Q8PHG4;Q9BWT6	MND1_HUMAN	MND1	Meiotic nuclear division protein 1 homolog
26.2244	24.3791	Q96K21;Q96K21-2	Q96K21-2;Q96K21-3;Q96K21-4;H3BRM1;H3BRF9;H3BN64;Q96K21	ANCHR_HUMAN	ZFYVE19	Abscission/NoCut checkpoint regulator
26.2248	27.9897	Q12840	J3KNA1;A0A6Q8PGN1;A0A6Q8PGJ3;A0A6Q8PGG7;A0A6Q8PEZ8;Q12840	KIF5A_HUMAN	KIF5A	Kinesin heavy chain isoform 5A
26.2249	26.051	Q9H825;Q9H825-2	C9J6U8;B5ME25;C9JE69;B3KW44;Q9H825-2;Q9H825	METL8_HUMAN	METTL8	tRNA N(3)-methylcytidine methyltransferase METTL8, mitochondrial
26.2251	23.1158	O43150;O43150-2	O43150-2;O43150	ASAP2_HUMAN	ASAP2	Arf-GAP with SH3 domain, ANK repeat and PH domain-containing protein 2
26.2268	25.6984	Q9UFG5	E7EP72;K7EK56;K7ELZ1;K7EQW1;K7ER12;A0A087WUU5;Q9UFG5-2;Q9UFG5	CS025_HUMAN	C19orf25	UPF0449 protein C19orf25
26.2317	26.2774	Q96MY1	Q96MY1-2;A0A087X0N3;Q96MY1	NOL4L_HUMAN	NOL4L	Nucleolar protein 4-like
26.2331	24.5986	P98160	A0A2R8YH07;P98160	PGBM_HUMAN	HSPG2	Basement membrane-specific heparan sulfate proteoglycan core protein
26.2336	25.0559	Q16875;Q16875-2;Q16875-3;Q16875-4	H0Y483;A0A1W2PR17;Q5W015;Q5VX20;Q16875-2;Q16875-3;Q16875-4;F2Z2I2;Q16875	F263_HUMAN	PFKFB3	6-phosphofructo-2-kinase/fructose-2,6-bisphosphatase 3
26.2369	26.9685	Q9BUR5;Q9BUR5-2	Q9BUR5-2;G3V1B6;H7C1U8;Q9BUR5	MIC26_HUMAN	APOO	MICOS complex subunit MIC26
26.2392	25.4645	P30038	P30038-2;P30038-3;P30038	AL4A1_HUMAN	ALDH4A1	Delta-1-pyrroline-5-carboxylate dehydrogenase, mitochondrial
26.2403	22.1853	Q9Y2R0	K7EPV0;Q9Y2R0	COA3_HUMAN	COA3	Cytochrome c oxidase assembly factor 3 homolog, mitochondrial
26.2406	26.8634	Q6ZN55;Q6ZN55-2	Q6ZN55-2;A0A0C4DFM2;Q6ZN55	ZN574_HUMAN	ZNF574	Zinc finger protein 574
26.2414	22.9526	Q92934	Q92934	BAD_HUMAN	BAD	Bcl2-associated agonist of cell death
26.2425	23.6353	Q6DD87	Q6DD87	ZN787_HUMAN	ZNF787	Zinc finger protein 787
26.2427	27.0161	Q13825	Q13825	AUHM_HUMAN	AUH	Methylglutaconyl-CoA hydratase, mitochondrial
26.2488	25.6413	Q8N1I0;Q8N1I0-3	Q8N1I0-2;Q8N1I0-3;Q8N1I0	DOCK4_HUMAN	DOCK4	Dedicator of cytokinesis protein 4
26.2513	25.3068	Q96BW1;Q96BW1-3	Q96BW1-3;A0A0A0MRR5;E9PSD7;A0A494C0H3;Q96BW1	UPP_HUMAN	UPRT	Uracil phosphoribosyltransferase homolog
26.2516	26.6849	Q6ZSS7	C9J134;C9JJH2;C9JAZ7;Q6ZSS7	MFSD6_HUMAN	MFSD6	Major facilitator superfamily domain-containing protein 6
26.252	22.4251	Q9NYP3	F8W8A5;H7C1C1;Q9NYP3	DONS_HUMAN	DONSON	Protein downstream neighbor of Son
26.2551	26.4776	Q8NG08	F5H1I4;Q8NG08	HELB_HUMAN	HELB	DNA helicase B
26.2569	27.7604	O43402	O43402-2;O43402	EMC8_HUMAN	EMC8	ER membrane protein complex subunit 8
26.259	25.6522	Q96QE2	Q96QE2	MYCT_HUMAN	SLC2A13	Proton myo-inositol cotransporter
26.2593	25.7572	Q5JPI3;Q5JPI3-2	Q5JPI3-2;E9PFZ1;Q5JPI3	CC038_HUMAN	C3orf38	Uncharacterized protein C3orf38
26.2597	27.7362	P30414	P30414	NKTR_HUMAN	NKTR	NK-tumor recognition protein
26.2625	25.9733	Q9BQI0;Q9BQI0-2;Q9BQI0-3	Q5JUP3;Q9BQI0-2;Q9BQI0-3;Q9BQI0-4;Q9BQI0	AIF1L_HUMAN	AIF1L	Allograft inflammatory factor 1-like
26.2633	22.2676	Q9NQB0;Q9NQB0-10;Q9NQB0-11;Q9NQB0-12;Q9NQB0-13;Q9NQB0-14;Q9NQB0-15;Q9NQB0-16;Q9NQB0-2;Q9NQB0-3;Q9NQB0-4;Q9NQB0-5;Q9NQB0-6;Q9NQB0-7;Q9NQB0-8;Q9NQB0-9	Q9NQB0-2;Q9NQB0-3;Q9NQB0-4;Q9NQB0-5;Q9NQB0-6;Q9NQB0-7;Q9NQB0-8;Q9NQB0-9;A0A0D9SGH8;A0A0A0MTL7;Q5VVR7;C6ZRJ7;C6ZRK5;A0A994J711;Q9NQB0-10;Q9NQB0-11;Q9NQB0-12;Q9NQB0-13;Q9NQB0-14;Q9NQB0-16;Q9NQB0-15;Q9NQB0	TF7L2_HUMAN	TCF7L2	Transcription factor 7-like 2
26.264	26.6749	O00115;O00115-2	O00115-2;A0A8V8TNK3;K7ENE5;O00115	DNS2A_HUMAN	DNASE2	Deoxyribonuclease-2-alpha
26.2648	26.3626	O94811	O94811	TPPP_HUMAN	TPPP	Tubulin polymerization-promoting protein
[truncated: 5,647 more rows]
