# Supplementary material for: CUL4A-DDB1-DCAF10 is an N-recognin for N-terminally acetylated Src kinases
Source: Research Square preprint supplement (doi:10.21203/rs.3.rs-6184818/v1), 2025-04-01
Supplement: Supplementary file 1 [file d466d7135fbcceca56f90f93.pdf]

## Supplementary Information

### CUL4A-DDB1-DCAF10 is an N-recognin for N-terminally acetylated Src kinases

Nora Kremer<sup>1,§</sup>, Franziska Mueller<sup>2,§</sup>, Hang Nguyen<sup>1</sup>, Tanja Popp<sup>1</sup>, Elena Artes<sup>1</sup>, Julian Wolters<sup>1</sup>, Michael Renner<sup>1</sup>, Ingrid Vetter<sup>2</sup>, Stefano Maffini<sup>2</sup>, Maria S. Robles<sup>1</sup>, Andrea Musacchio<sup>2,3</sup>, Tanja Bange<sup>1,\*</sup>

<sup>1</sup>, Institute of Medical Psychology and Biomedical Center (BMC), Faculty of Medicine, LMU Munich, 80336 Munich, Germany

<sup>2</sup>, Department of Mechanistic Cell Biology, Max Planck Institute of Molecular Physiology, 44227 Dortmund, Germany

<sup>3</sup>, Centre for Medical Biotechnology, Faculty of Biology, University of Duisburg-Essen, 45141 Essen, Germany

<sup>§</sup> these authors contributed equally

<sup>\*</sup> address correspondence to

T.B.: [tanja.bange@med.uni-muenchen.de](mailto:tanja.bange@med.uni-muenchen.de), +49-89-218075654, ORCID 0000-0002-9680-8586

**Keywords:** N-degron pathway, Src family kinases, Nt-acetylation, N-myristoylation, ubiquitination, CUL4A-DDB1-DCAF10

|    |                                                                                           |
|----|-------------------------------------------------------------------------------------------|
| 22 | <b>Table of Contents:</b>                                                                 |
| 23 | <b>Supplementary Methods</b>                                                              |
| 24 | <b>Supplementary Material Tables</b>                                                      |
| 25 | Supplementary Table S1. Peptides                                                          |
| 26 | Supplementary Table S2. Cell lines                                                        |
| 27 | Supplementary Table S3. siRNAs                                                            |
| 28 | Supplementary Table S4. Oligonucleotides and primers                                      |
| 29 | Supplementary Table S5. Plasmids                                                          |
| 30 | Supplementary Table S6. Antibodies                                                        |
| 31 | Supplementary Table S7. Antibiotics used in bacterial and cell culture                    |
| 32 | Supplementary Table S8. Reagents and Kits                                                 |
| 33 | Supplementary Table S9. List of enzymes                                                   |
| 34 | Supplementary Table S10. Software and Algorithms                                          |
| 35 | <b>Supplementary Tables for mass spectrometry data:</b>                                   |
| 36 | Supplementary Table S11. MS data volcano plots to <b>Figure 1</b>                         |
| 37 | Supplementary Table S12. MS data volcano plots to <b>Extended Figure 1</b>                |
| 38 | Supplementary Table S13. MS data DCAF10 fractionation to <b>Figure 3</b>                  |
| 39 | Supplementary Table S14. MS data ZYG11B fractionation to <b>Figure 3</b>                  |
| 40 | Supplementary Table S15. MS data Lyn parental and KOs to <b>Extended Figure 6</b>         |
| 41 | Supplementary Table S16. MS data Ac-Ala and Pro volcano plots to <b>Extended Figure 6</b> |

## Supplementary Methods

### Purification of GST-DCAF10

DCAF10 was amplified from pcDNA3.1+/C-(K)-DYK (GenScript; Piscataway, New Jersey, USA) and via Gibson cloning integrated in the first cassette of pGEX-6P-2rbs (GenBank accession code KM817768)<sup>46</sup>. BL21(DE3) cells (Thermo Fisher Scientific, Waltham, MA, USA) transformed with pGEX-6P-2rbs-DCAF10 were inoculated from a single colony picked from a Lysogeny Broth (LB) agar (LB medium with 1.5% (w/v) agar) plate containing 100 ng/mL ampicillin and 34 ng/mL chloramphenicol, then cultured overnight in LB medium (10 g/L tryptone, 5 g/L yeast extract, 10 g/L NaCl, pH 7.4) with the appropriate antibiotics. Terrific broth (TB) medium (24 g/L yeast extract, 20 g/L tryptone, glycerol 4 mL/L, 100 mL/L phosphate buffer containing 0.17 M KH<sub>2</sub>PO<sub>4</sub> and 0.72 M K<sub>2</sub>HPO<sub>4</sub>) was used to prepare a 1:100 dilution of the starter culture, and OD<sub>600</sub> (600 nm) was measured. At OD<sub>600</sub> = 1, protein induction was initiated by adding 1:1000 dilution of 1 M IPTG for overnight expression at 16°C for 18 h with shaking (120 rpm). The following day, pellets were homogenized and lysed in glycerol lysis buffer (20 mM Tris-HCl pH 6.8, 300 mM NaCl, 10% (v/v) glycerol, 5 mM 2-mercaptoethanol supplemented with protease inhibitor cocktail). Lysis was performed on ice for 30 min, followed by sonication (7 × 20 sec pulses with 20 sec breaks on ice) using a Bandelin sonoplus sonicator (Sonotrode MS1.5, 70% output, 20W). Lysates were centrifuged at 4°C for 1 h at 14,000 × g, and the supernatant was transferred in a new tube. 1 L of TB growth medium culture yielded 20 mL of supernatant (collected in 20 × 1 mL tubes).

GST beads were used according to manufacturer's instructions (Pierce<sup>TM</sup> Glutathione magnetic agarose bead; Thermo Fisher Scientific, Waltham, MA, USA). For each 1 mL of supernatant, 100 µL GST magnetic beads were used. 100 µL GST-magnetic beads were washed twice with 500 µL wash buffer (125 mM Tris-HCl pH 7.4, 150 mM NaCl, 1 mM DTT, 1 mM EDTA) in a 2 mL tube. The lysis supernatant was diluted 1:1 with wash buffer, and incubated with the beads on an end-over-end rotator for 1 h at 25°C. After incubation, the supernatant was removed, and

the beads were washed twice with wash buffer (without DTT and EDTA). Protein elution was then performed by incubating the beads with glutathione elution buffer (10 mM reduced glutathione, 125 mM Tris-HCl pH 7.4, 250 mM NaCl, 0.3% Triton X-100) for 30 min at 25°C on an end-over-end rotator. This process was repeated with glutathione elution buffer containing 0.1% Triton X-100 under the same conditions. Elution fractions were pooled and concentrated by centrifugation (4°C, 25 min, 4500 rpm) using a 30 kD cut-off concentrator (Merck Millipore, #UFC803008, Darmstadt, Germany). Purified proteins were analyzed by colloidal Coomassie stain, WB and MS.

### **Cloning, expression, and purification of hNatA**

Human NatA (hNatA) full-length (FL) was cloned in a pFL vector expressing both genes, NAA15 with a 6× C-term histidine tag (NAA15-6xHIS) and NAA10. The expression was carried out in insect cells (Tnao38) for 72 h infected 1:20 with baculovirus. Washed cell pellets were lysed by sonication in a lysis buffer containing 200 mM NaCl, 50 mM HEPES pH 8.0, 20 mM Imidazole, and 2 mM TCEP. The protein purification was performed as a three-step purification, starting with an affinity nickel-column, followed by an ion-exchange column with a gradient of 50–300 mM NaCl, and finished with size exclusion chromatography (SEC) using an S200 10/300 column. The main peaks were collected, and the protein was concentrated in SEC buffer (150 mM NaCl, 50 mM HEPES pH 8.0, 1 mM EDTA). The purified hNatA was flash-frozen in liquid nitrogen and stored at -80°C.

### **SiRNA knockdown and overexpression experiments in HeLa, DLD-1, and RPE-1 cell lines**

HeLa, DLD-1, and RPE-1 cells were grown in Dulbecco's Modified Eagle Medium (DMEM) supplemented with 10% fetal bovine serum (FBS). Cells were counted and diluted to 100,000 cells/mL. For siRNA knockdown, the transfection reagent Lipofectamine RNAiMAX (Invitrogen, Thermo Fisher Scientific, Waltham, MA, USA) was used at a final dilution of

1:333 (3  $\mu$ L/mL of medium). Pools of siRNAs, including siNMT1, siNMT2, siDCAF10, siZYG11B, and siZER1, or combinations of different siRNAs, were reverse transfected at a concentration of 25 nM for each siRNAi and incubated as indicated (48–72 h). As control, cells were treated only with Lipofectamine RNAiMAX. Both siRNAs and RNAiMAX were diluted in Opti-MEM (Thermo Fisher Scientific, Waltham, MA, USA). For overexpression of DCAF10, the transfection reagent Lipofectamine 2000 (Thermo Fisher Scientific, Waltham, MA, USA) was used at a final dilution of 1:200 (2  $\mu$ L/mL of medium). For one 6-well, 4  $\mu$ g of DNA were combined with Lipofectamine 2000 and diluted in Opti-MEM. The medium was changed 4–6 h post-transfection. The transfection was performed one day after plating, and the cells were incubated for an additional 24 h. For proteasomal or translational inhibition, the cells were treated with 10  $\mu$ M MG132 or 100  $\mu$ g/mL cycloheximide for 4 and 8 h before lysis, respectively.

#### **High-pH fractionation for DCAF10 and ZYG11B MS measurements**

10  $\mu$ g of cellular lysates were reduced, alkylated, and digested with LysC/Trypsin (protein:enzyme ratio of 1:100) according to MS standard in-solution digest<sup>55</sup>. Peptides were then separated with a high-pH fractionation kit (eight fractions for DCAF10 and four fractions for ZYG11B; Thermo Fisher Scientific, Waltham, MA, USA). Each fraction was again separated using a 50 min gradient from 5–60% acetonitrile with 0.1% formic acid using a self-packed 50 cm column (ReprosilC18, 75  $\mu$ M inner diameter), and directly sprayed via a nano-electrospray source in an Orbitrap Exploris<sup>TM</sup> 480 (Thermo Fisher Scientific, Waltham, MA, USA). Data were acquired in a data-independent mode, acquiring one survey scan (MS scan) with 120 k resolution and subsequently 34 windows with an isolation width of 18.7 Th with 1 Dalton overlap from 350 to 1000 m/z at a resolution of 15 k (1.5 sec cycle time). The target value was set to 300% for the MS scan and 1000% for the MS/MS scans. The maximum injection time was 45 msec for MS. HCD Collision energy was set to 30%. Resulting raw files

were processed with DIA-NN (version 1.8.2 beta 22 and 27) using a Uniprot human database (reference January 2023)<sup>91</sup>. Oxidation (M), M excision, Nt-acetylation, and carbamidomethylation (C) were given as modifications. One miscleavage and two modifications per peptide were allowed. A false discovery rate cut-off of 1% was applied. Intensities of fractions from the report.pg\_matrix.tsv were then summed and log<sub>2</sub>-transformed (log<sub>2</sub>) for overall protein quantities. DCAF10 and ZYG11B were detected in control cells but not in KD cells. To not overestimate the KD, we considered that the protein amounts of ZYG11B and ZER in the siRNA treated cells must be below the detection limit of these MS runs. Therefore, we used for our knock-down estimation the log<sub>2</sub> intensity of DCAF10 or ZYG11B, respectively, in the control cells and subtracted it from the lowest measured proteins. For DCAF10: 22.37 (mean log<sub>2</sub> intensity of DCAF10) - 14.35 (log<sub>2</sub> intensity of lowest quantified protein) means at least a log<sub>2</sub> reduction of 8. For ZYG11B: 19.7 (mean log<sub>2</sub> intensity of Zyg11B) - 15.7 (log<sub>2</sub> intensity of lowest measured proteins) means at least a log<sub>2</sub> reduction of 4.

### **Site-directed mutagenesis**

To generate Lyn variants with mutated N-terminal amino acid, site-directed mutagenesis was performed on the pcDNA5/FRT/TO-Lyn<sup>WT</sup>-EGFP-IRES construct using primers (listed in **Supplementary Table S4**) that carry single (for G2A) or double (for G2P) mismatches to wild-type Lyn in PCR reactions. The resulting PCR products were purified using the Wizard® SV Gel and PCR Clean-Up System (Promega; Madison, WI, USA) according to the manufacturer's instructions, followed by DpnI digestion, phosphorylation, and ligation. Subsequently, half of the ligation reaction was transformed into DH5α competent cells. After isolation, the plasmid DNA from single colonies was sent for Sanger sequencing (Eurofins Genomics, Munich, Germany) to confirm successful mutagenesis.

## Fluorescence microscopy

Cells were seeded on coverslips to be 90% confluent on the day of fixation. Lyn-GFP expression was induced by 24 h of doxycycline treatment (100 ng/mL for Lyn<sup>WT</sup>, and 10 ng/mL for Lyn<sup>G2A</sup> and Lyn<sup>G2P</sup>), or media was just replaced for the controls (without doxycycline). Cells were washed once with PBS before fixation with 4% PFA in PBS for 10 min at RT. After three washes with PBS, cells were permeabilized with PBS-T (PBS with 0.1% (v/v) Tween-20) for 10 min at RT. Afterwards, cover slips were incubated in 0.5 µg/mL DAPI diluted in PBS-T for 5 min at RT. After a final wash in ddH<sub>2</sub>O, the coverslips were dried on the air and mounted with Mowiol as a mounting medium on glass slides. Image acquisition of cells was performed at RT using a Deltavision Elite System (GE Healthcare, Chicago, IL, USA) equipped with an IX-71 inverted microscope (Olympus, Tokyo, Japan), a 60x/1.42 Plan Apo N objective and a pco.edge sCMOS camera (PCO-TECH Inc., Kelheim, Germany). Images were acquired as z-stacks containing 16 sections with a distance of 200 nm using the software softWoRx (GE Healthcare, Chicago, IL, USA). Raw data were then deconvolved and converted into average intensity projections, exported, and saved as 16-bit TIFF files. Figures were edited and arranged using ImageJ. Acquisition settings: Green channel: 0.1 sec, 50% transmission; DAPI channel: 0.01 sec, 32% transmission.

## Supplementary Methods References

55. Shevchenko, A., Tomas, H., Havli, J., Olsen, J. V. & Mann, M. In-gel digestion for mass spectrometric characterization of proteins and proteomes. *Nat. Protoc.* **1**, 2856–2860 (2006).

## Supplementary Tables

Peptides have been purchased from GenScript (Piscataway, NJ, USA).

| Gene name                  | Peptide sequence   | Protein name / UniProt ID                                                     | Nt modification | C-terminal modification |
|----------------------------|--------------------|-------------------------------------------------------------------------------|-----------------|-------------------------|
| ARF1                       | GNIFANLFKGKK       | ADP-ribosylation factor 1 / P84077                                            | /               | K(biotin)               |
| ARF1                       | GNIFANLFKGKK       | ADP-ribosylation factor 1 / P84077                                            | acetyl-group    | K(biotin)               |
| COX17                      | PGLVDSNPAPKK       | Cytochrome c oxidase copper chaperone / Q14061                                | /               | K(biotin)               |
| EF1B                       | GFGDLKSPAGKK       | Elongation factor 1-beta / P24534                                             | /               | K(biotin)               |
| EF1B                       | GFGDLKSPAGKK       | Elongation factor 1-beta / P24534                                             | acetyl-group    | K(biotin)               |
| FYN                        | GCVQCKDKEAKK       | Tyrosine-protein kinase Fyn / P06241                                          | /               | K(biotin)               |
| FYN                        | GCVQCKDKEAKK       | Tyrosine-protein kinase Fyn / P06241                                          | acetyl-group    | K(biotin)               |
| FYN                        | GCVQCKDKEAKK       | Tyrosine-protein kinase Fyn / P06241                                          | myristoyl-group | K(biotin)               |
| GNAI3                      | GCTLSAEDKAKK       | Guanine nucleotide-binding protein G(i) subunit alpha-3 / P08754              | /               | K(biotin)               |
| GNAI3                      | GCTLSAEDKAKK       | Guanine nucleotide-binding protein G(i) subunit alpha-3 / P08754              | acetyl-group    | K(biotin)               |
| LYN                        | GCIKSKGKDSKK       | Tyrosine-protein kinase Lyn / P07948                                          | /               | K(biotin)               |
| LYN                        | GCIKSKGKDSKK       | Tyrosine-protein kinase Lyn / P07948                                          | acetyl-group    | K(biotin)               |
| LYN                        | GCIKSKGKDSKK       | Tyrosine-protein kinase Lyn / P07948                                          | myristoyl-group | K(biotin)               |
| LYN G2A                    | ACIKSKGKDSKK       | Tyrosine-protein kinase Lyn / P07948                                          | acetyl-group    | K(biotin)               |
| LYN P2A                    | PCIKSKGKDSKK       | Tyrosine-protein kinase Lyn / P07948                                          | /               | K(biotin)               |
| <i>NatA target peptide</i> | SASEAGVRWGRPVGRRRR | /                                                                             | /               | /                       |
| NDUFAF4                    | GALVIRGIRNKK       | NADH dehydrogenase [ubiquinone] 1 alpha subcomplex assembly factor 4 / Q9P032 | /               | K(biotin)               |
| NDUFAF4                    | GALVIRGIRNKK       | NADH dehydrogenase [ubiquinone] 1 alpha subcomplex assembly factor 4 / Q9P032 | acetyl-group    | K(biotin)               |
| SRC                        | GSNKS KPKDAKK      | Proto-oncogene tyrosine-protein kinase Src / P12931                           | /               | K(biotin)               |
| SRC                        | GSNKS KPKDAKK      | Proto-oncogene tyrosine-protein kinase Src / P12931                           | acetyl-group    | K(biotin)               |
| THOC7                      | GAVTDDDEVIRKK      | THO complex subunit 7 / Q6I9Y2                                                | /               | K(biotin)               |



|        |               |                                         |              |           |
|--------|---------------|-----------------------------------------|--------------|-----------|
| THOC7  | GAVTDDEVIRKK  | THO complex subunit 7 / Q619Y2          | acetyl-group | K(biotin) |
| TMEM97 | GAPATRRRCVEKK | Sigma intracellular receptor 2 / Q5BJF2 | /            | K(biotin) |
| TMEM97 | GAPATRRRCVEKK | Sigma intracellular receptor 2 / Q5BJF2 | acetyl-group | K(biotin) |
| YES    | GCIKSKENKSKK  | Tyrosine-protein kinase Yes / P07947    | /            | K(biotin) |
| YES    | GCIKSKENKSKK  | Tyrosine-protein kinase Yes / P07947    | acetyl-group | K(biotin) |

171 **Supplementry S2. Cell lines**

| Cell line                                                                     | Plasmid                 | Gene    | Tag          | Reference                                                    |
|-------------------------------------------------------------------------------|-------------------------|---------|--------------|--------------------------------------------------------------|
| DLD-1 Flp-In <sup>TM</sup> T-REx <sup>TM</sup>                                | /                       | /       | /            | A gift from AG Musacchio, Dr. Stefano Maffini (MPI Dortmund) |
| DLD-1 Flp-In <sup>TM</sup> T-REx <sup>TM</sup> Lyn KO                         | /                       | /       | /            | this study                                                   |
| DLD-1 KO Lyn Flp-In <sup>TM</sup> T-REx <sup>TM</sup> Lyn <sup>G2A</sup> -GFP | pCDNA5/FRT/TO-EGFP-IRES | LYN-G2A | GFP (C-term) | this study                                                   |
| DLD-1 KO Lyn Flp-In <sup>TM</sup> T-REx <sup>TM</sup> Lyn <sup>G2P</sup> -GFP | pCDNA5/FRT/TO-EGFP-IRES | LYN-G2P | GFP (C-term) | this study                                                   |
| DLD-1 KO Lyn Flp-In <sup>TM</sup> T-REx <sup>TM</sup> Lyn <sup>WT</sup> -GFP  | pCDNA5/FRT/TO-EGFP-IRES | LYN-WT  | GFP (C-term) | this study                                                   |
| Hela Flp-In <sup>TM</sup> T-REx <sup>TM</sup>                                 | /                       | /       | /            | A gift from S. Taylor (University of Manchester)             |
| RPE-1 Flp-In <sup>TM</sup> T-REx <sup>TM</sup>                                | /                       | /       | /            | A gift from AG Musacchio, Dr. Stefano Maffini (MPI Dortmund) |

172

173 **Tsupplementary S3. siRNAs**

| siRNA                            | Company   | Identifier       |
|----------------------------------|-----------|------------------|
| ON-TARGETplus siRNA Human DCAF10 | Dharmacon | L-014344-01-0005 |
| ON-TARGETplus siRNA Human NMT1   | Dharmacon | L-004316-01-0005 |
| ON-TARGETplus siRNA Human NMT2   | Dharmacon | L-004317-01-0005 |
| ON-TARGETplus siRNA Human ZER1   | Dharmacon | L-019424-02-0005 |
| ON-TARGETplus siRNA Human ZYG11B | Dharmacon | L-021798-02-0005 |

174 **Supplementary Table S4. Oligonucleotides and primers (F: Forward, R: Reverse)**

| Sequence 5' to 3'                                              | Company  | Purpose                                                             |
|----------------------------------------------------------------|----------|---------------------------------------------------------------------|
| GTTCTGTTCCAGGGGCCCTGGGATCCATGTT<br>TCCCTTTGGGCCCCATAG          | Metabion | F primer DCAF10 to clone in pGEX-6P-2rbs for Gibson cloning         |
| CAGTCAGTCACGATGCGGCCGCTCGAGCTAC<br>TAAACTTTGGCTGTACAAAGAAACCCG | Metabion | R primer DCAF10 to clone in pGEX-6P-2rbs for Gibson cloning         |
| TTCTTCCAGTTGCCCCCTCT                                           | Metabion | crRNA for Lyn KO (sequence 1)                                       |
| GGAGGCCTCATACCCATTACA                                          | Metabion | crRNA for LYN KO (sequence 2)                                       |
| GCCACCATGGTGAGCAAG                                             | Metabion | pcDNA5-F to linearize pcDNA5/FRT/TO-EGFP-IRES                       |
| GGTACCAAGCTTAAGTTTAAACGC                                       | Metabion | pcDNA5-R to linearize pcDNA5/FRT/TO-EGFP-IRES                       |
| TAAACTTAAGCTTGGTACCATGGGATGTAT<br>AAAATCAAAGGG                 | Metabion | F primer to amplify LYN cDNA from pCR4-TOPO-LYN for Gibson assembly |
| CCCTTGCTCACCATGGTGGCAGGCTGCTGCT<br>GGTATTG                     | Metabion | R primer to amplify LYN cDNA from pCR4-TOPO-LYN for Gibson assembly |

|                                                                    |          |                                                                                                        |
|--------------------------------------------------------------------|----------|--------------------------------------------------------------------------------------------------------|
| CTTAAGTTTAAACGCTAGAGTCCG                                           | Metabion | LYN-R Site-directed mutagenesis of LYN in the pcDNA5/FRT/TO-LYN <sup>WT</sup> -EGFP-IRES construct     |
| CTTGGTACCATGGCATGTATAAAATC                                         | Metabion | LYN G2A-F Site-directed mutagenesis of LYN in the pcDNA5/FRT/TO-LYN <sup>WT</sup> -EGFP-IRES construct |
| CTTGGTACCATGCCATGTATAAAATC                                         | Metabion | LYN G2P-F Site-directed mutagenesis of LYN in the pcDNA5/FRT/TO-LYN <sup>WT</sup> -EGFP-IRES construct |
| GCTACCCGGGATGAACATCCGCAATGCC                                       | Sigma    | NAA10 F - Amplifying full-length wildtype human NAA10 for pFH vector                                   |
| TGCAGCTAGCTTAGCTGGCGCTATCGC                                        | Sigma    | NAA10 R - Amplifying full-length wildtype human NAA10 for pFH vector                                   |
| GATCGGATCCATGCCAGCCGTGTCCCTG                                       | Sigma    | NAA15 F - Amplifying full-length wildtype human NAA15-6xHIS for pFH vector                             |
| CGTAGTCGACCTAGTGATGGTGATGGTGATG<br>GATCTCGTTGGCCAGCTC              | Sigma    | NAA15-6xHIS R - Amplifying full-length wildtype human NAA15-6xHIS for pFH vector                       |
| TTGTTTCAAGGTCTTGGATCCTCGTACAACCTA<br>CGTGGTAACGGC                  | Sigma    | DDB1 F StrepII - Gibson cloning in pLIB                                                                |
| TCCTCTAGTACTTCTCGACAAGCTTTTACTAA<br>TGGATCCGAGTTAGCTCCTCC          | Sigma    | DDB1 R - Gibson cloning in pLIB                                                                        |
| CCACCATCGGGCGCGGATCCATGCATCACCA<br>TCACCATCACTTTCCCTTTGGGCCCCATAGC | Sigma    | DCAF10 6xHIS F - Gibson cloning in pLIB                                                                |
| CTGTTCCAGGGGCCCGGATCCTTTCCCTTTGG<br>GCCCCATAGC                     | Sigma    | DCAF10 F MBP - Gibson cloning in pLIB                                                                  |
| TCCTCTAGTACTTCTCGACAAGCTTTTATCAA<br>AACTTTGGCTGATACAAAGAAACCCG     | Sigma    | DCAF10 R - Gibson cloning in pLIB                                                                      |
| CCACCATCGGGCGCGGATCCATGGCGGACGA<br>GGCCC                           | Sigma    | CUL4A F - Gibson cloning in pLIB                                                                       |
| TCCTCTAGTACTTCTCGACAAGCTTTTATCAG<br>GCCACGTAGTGGTACTG              | Sigma    | CUL4A R - Gibson cloning in pLIB                                                                       |
| CCACCATCGGGCGCGGATCCATGGCGGCGGC<br>GATG                            | Sigma    | RBX1 F - Gibson cloning in pbig1a                                                                      |
| TCCTCTAGTACTTCTCGACAAGCTTTTACTAA<br>TGCCCATACTTCTGGAACCTCC         | Sigma    | RBX1 R - Gibson cloning in pbig1a                                                                      |
| AACGCTCTATGGTCTAAAGATTTAAATCGAC<br>CTACTCCGGAATATTAATAGATC         | Sigma    | Cas I F - Gibson cloning in pbig1a                                                                     |
| AAACGTGCAATAGTATCCAGTTTATTTAAAT<br>GGTTATGATAGTTATTGCTCAGCG        | Sigma    | Cas I R - Gibson cloning in pbig1a                                                                     |
| AAACTGGATACTATTGCACGTTTAAATCGAC<br>CTACTCCGGAATATTAATAGATC         | Sigma    | Cas II F - Gibson cloning in pbig1a                                                                    |
| AAACATCAGGCATCATTAGGTTTATTTAAAT<br>GGTTATGATAGTTATTGCTCAGCG        | Sigma    | Cas II R - Gibson cloning in pbig1a                                                                    |
| AAACCTAATGATGCCTGATGTTTAAATCGAC<br>CTACTCCGGAATATTAATAGATC         | Sigma    | Cas III F - Gibson cloning in pbig1a                                                                   |
| AACCCCGATTGAGATATAGATTTATTTAAAT<br>GGTTATGATAGTTATTGCTCAGCG        | Sigma    | Ω R - Gibson cloning in pbig1a                                                                         |
| GTACGGTTGCATGGGGAGTCGCCAACGCTGC<br>TTTTCAATTCCTCACTGCATC           | Sigma    | RBX1 mut - Gibson cloning in pbig1a                                                                    |
| ATTGGAGACATTTTGATGGCTTG                                            | Metabion | F - Diagnostic primers for LYN KO exon 2                                                               |
| TTTCTTCACACAAAAGAATGTGACC                                          | Metabion | R - Diganosite primers for LYN KO exon 2                                                               |
| TTCTTCCAGTTGCCCCCTCT                                               | Metabion | F - Diagnostic primers for LYN KO exon 4                                                               |
| GGAGGCCTCATACCCATTACA                                              | Metabion | R - Diganosite primers for LYN KO exon 4                                                               |

176 **Supplementary Table S5. Plasmids**

| Plasmid backbone         | Gene                                         | Reference                                                    |
|--------------------------|----------------------------------------------|--------------------------------------------------------------|
| pbiG1a                   | /                                            | A gift from AG Musacchio, (MPI Dortmund)                     |
| pbiG1a                   | DDB1, CUL4A, RBX1 human                      | this study                                                   |
| pbiG1a                   | DDB1, CUL4A, RBX1 <sup>C75A/H77A</sup> human | this study                                                   |
| pcDNA3.1+/c-(k)-DYK      | DCAF10 human                                 | Genscript ORF #OHu10624D                                     |
| pcDNA5/FRT/TO--EGFP-IRES | LYN <sup>G2A</sup> human                     | this study                                                   |
| pCDNA5/FRT/TO-EGFP-IRES  | /                                            | A gift from AG Musacchio, Dr. Stefano Maffini (MPI Dortmund) |
| pcDNA5/FRT/TO-EGFP-IRES  | LYN <sup>WT</sup> human                      | this study                                                   |
| pcDNA5/FRT/TO-EGFP-IRES  | LYN <sup>G2P</sup> human                     | this study                                                   |
| pCR4-TOPO-LYN            | LYN human                                    | Horizon Discovery/Dharmacon (#MHS6278-202856900)             |
| pFL                      | /                                            | A gift from AG Musacchio (MPI Dortmund)                      |
| pFL                      | NAA15-6xHIS + NAA10 human                    | this study                                                   |
| pGEX-6P-2rbs             | DCAF10 human                                 | this study                                                   |
| pGEX-6P-2rps             | /                                            | GenBank accession code KM817768                              |
| pLIB                     | /                                            | A gift from AG Musacchio (MPI Dortmund)                      |
| pLIB                     | CUL4A human                                  | this study                                                   |
| pLIB                     | RBX1 human                                   | this study                                                   |
| pLIB-6xHis-MBP           | DCAF10 human                                 | this study                                                   |
| pLIB-HIS-MBP             | /                                            | A gift from AG Musacchio, Dr. John Weir (MPI Dortmund)       |
| pLIB-StrepII             | DDB1 human                                   | this study                                                   |
| pLIB-StrepII-3C          | /                                            | A gift from AG Musacchio (MPI Dortmund)                      |
| pOG44                    | /                                            | A gift from AG Musacchio, Dr. Stefano Maffini (MPI Dortmund) |

177

178 **Supplementary Table S6. Antibodies**

| Antibody                      | Company                  | Identifier |
|-------------------------------|--------------------------|------------|
| anti-CUL4A Rabbit pAb         | Cell Signaling           | #2699      |
| anti-DCAF10/ WDR32 Rabbit pAb | Thermo Fisher Scientific | #PA5-24133 |
| anti-DDB1 (D4C8) Rabbit mAb   | Cell Signalling          | #6998      |

|                                             |                          |              |
|---------------------------------------------|--------------------------|--------------|
| anti-FLAG (DYKDDDDK) Mouse mAb              | Cell Signaling           | #8146S       |
| anti-Fyn Rabbit pAb                         | Cell Signaling           | #4023S       |
| anti-GFP Rabbit pAb                         | In-house                 | AG Musacchio |
| anti-GFP Mouse mAb                          | Roche                    | #11814460001 |
| anti-GST Mouse mAb                          | Merck Millipore          | #71097       |
| anti-Lyn (C13F9) Rabbit mAb                 | Cell Signaling           | #2796S       |
| anti-mouse IgG HRP linked antibody          | Cell Signaling           | #CST 7076S   |
| anti-NMT1 Rabbit pAb                        | abcam                    | #AB186123    |
| anti-NMT2 Rabbit pAb                        | abcam                    | #AB230028    |
| anti-rabbit IgG HRP-linked Antibody         | Cell Signaling           | #7074S       |
| anti-Src (36D10) Rabbit mAb                 | Cell Signaling           | #2109S       |
| anti-Streptavidin Rabbit pAb                | Rockland immunochemicals | #100-4195    |
| anti-THOC7 Rabbit pAb                       | abcam                    | #ab155218    |
| anti-Ubiquitin-HRP (P4D1) Mouse mAb         | Cell Signaling           | #14049       |
| anti-Vinculin Mouse mAb                     | Sigma                    | #V9131       |
| anti-ZER1 Rabbit pAb                        | Proteintech              | #16647-1-AP  |
| anti-ZYG11B Rabbit pAb                      | antibodies-online.com    | #ABIN4916715 |
| VeriBlot Detection Reagent (for IP samples) | abcam                    | #ab131366    |

**Supplementary Table S7. Antibiotics used in bacterial and cell culture**

| Reagent                 | Working concentration | Company                        |
|-------------------------|-----------------------|--------------------------------|
| Ampicillin              | 100 µg/mL             | Sigma                          |
| Blasticidin             | 8 µg/mL               | Sigma                          |
| Chloramphenicol         | 34 µg/mL              | Sigma                          |
| Doxycycline             | 10–100 ng/mL          | Sigma                          |
| Gentamicin              | 10 µg/mL              | Sigma                          |
| Hygromycin B            | 400 µg/mL             | Sigma                          |
| Kanamycin               | 50 µg/mL              | Sigma                          |
| Penicillin-streptomycin | 100 U/mL              | Gibco/Thermo Fisher Scientific |
| Tetracyclin             | 7 µg/mL               | Sigma                          |

**Supplementary Table S8. Reagents and Kits**

| Reagent                                                                              | Company                              | Reference number |
|--------------------------------------------------------------------------------------|--------------------------------------|------------------|
| Acetyl-Coenzym A                                                                     | Sigma Aldrich                        | A2056            |
| Biotin                                                                               | iba                                  | 2-1016-002       |
| BL21(DE3)                                                                            | Thermo Fisher Scientific             | EC0114           |
| CoA                                                                                  | Sigma Aldrich                        | C4282            |
| CPM (7-Diethylamino-3-(4'-Maleimidylphenyl)-4-Methylcoumarin)                        | Invitrogen                           | D346             |
| Cycloheximide                                                                        | Sigma Aldrich                        | C4859-1mL        |
| Dulbecco's Modified Eagle Medium (DMEM), high glucose, GlutaMAX Supplement, pyruvate | Gibco/Thermo Fisher Scientific       | 31966047         |
| Dynabeads™ MyOne™ Streptavidin                                                       | Invitrogen/ Thermo Fisher Scientific | 65601            |
| Dynabeads™ Protein A Immunoprecipitation Kit                                         | Invitrogen/ThermoFisher Scientific   | 10006D           |
| Fetal bovine serum (FBS)                                                             | Pan Biotech                          | P13-3001         |
| GeneJET Plasmid Miniprep Kit                                                         | Thermo Fisher Scientific             | K0502            |
| GFP-Trap magnetic agarose                                                            | ChromoTek                            | gtma             |
| Glutathione                                                                          | Thermo Fisher Scientific             | 78259            |
| GST magnetic agarose beads                                                           | Pierce/ Thermo Fisher Scientific     | #78602           |
| IPTG                                                                                 | Thermo Fisher Scientific             | 15529019         |
| Lipofectamine RNAiMAX                                                                | Invitrogen/ Thermo Fisher Scientific | 13778-150        |
| Lipofectamine® 2000                                                                  | Invitrogen/ Thermo Fisher Scientific | 11668-027        |
| LysC                                                                                 | Wako Chemicals                       | 129-02541        |
| MG132                                                                                | Sigma-Aldrich                        | 474787           |
| Monarch DNA Gel Extraction Kit                                                       | New England BioLabs                  | T1120S           |

|                                                      |                                |             |
|------------------------------------------------------|--------------------------------|-------------|
| Monarch PCR & DNA Cleanup Kit                        | New England BioLabs            | T1130S/L    |
| Opti-MEM I reduced-Serum medium                      | Gibco/Thermo Fisher Scientific | 31985062    |
| PageRuler Plus Prestained Protein Ladder             | Thermo Fisher Scientific       | 26619       |
| Phosphostop                                          | Roche                          | 04906845001 |
| Pierce <sup>TM</sup> Glutathione Magnetic Agarose    | Thermo Fisher Scientific       | 78602       |
| Precision Plus Protein Standard Dual color           | BIO-RAD                        | 1610374     |
| Protease Inhibitors                                  | Roche                          | 04693132001 |
| PureYield Plasmid Miniprep System                    | Promega                        | A1223       |
| Recombinant Human UbcH5a/UBE2D1 Protein (E2)         | Bio-Techne GmbH                | E2-622      |
| Recombinant Human Ubiquitin Activating Enzyme (UBE1) | Bio-Techne GmbH                | E-304-050   |
| Recombinant Human Ubiquitin Protein (Ub)             | Bio-Techne GmbH                | P0CG47.1    |
| SF Cell Line 4D-Nucleofector X Kit S                 | Lonza                          | V4XC-2032   |
| Strep-Tactin®XT 4Flow® beads                         | iba                            | 2-5010-010  |
| Trypsine                                             | Sigma-Aldrich                  | T6567       |
| Wizard SV Gel and PCR Clean-Up System                | Promega                        | A9281       |
| X-tremeGNE 360 Transfection reagent                  | Sigma-Aldrich                  | XTG360RO    |

183 **Supplementary Table S9. List of enzymes**

| Enzyme                                                                                 | Supplier                                                    | Reference Number |
|----------------------------------------------------------------------------------------|-------------------------------------------------------------|------------------|
| <i>Bam</i> HI HF                                                                       | New England Biolabs GmbH                                    | R3136S           |
| Benzonase® Nuclease                                                                    | Sigma-Aldrich                                               | 9025-65-4        |
| <i>Dpn</i> I restriction enzyme                                                        | New England Biolabs GmbH                                    | RO176S           |
| Gibson Assembly Master Mix (containing T5 Exonuclease, Phusion polymerase, Tag ligase) | New England Biolabs GmbH/<br><i>in-house</i> ; AG Musacchio | E2611S           |
| <i>Hind</i> III HF                                                                     | New England Biolabs GmbH                                    | R3104S           |
| Phusion® High-Fidelity PCR 2x Master Mix                                               | New England Biolabs GmbH                                    | M0530S           |
| <i>Pme</i> I                                                                           | New England Biolabs GmbH                                    | R0560S           |
| Q5® High-Fidelity 2x Master Mix                                                        | New England Biolabs GmbH                                    | M0494S           |
| <i>Swa</i> I                                                                           | New England Biolabs GmbH                                    | R0604S           |
| <i>T4</i> DNA Ligase                                                                   | New England Biolabs GmbH                                    | M0202S           |
| <i>T4</i> Polynucleotide Kinase                                                        | New England Biolabs GmbH                                    | M0201S           |

184 **Supplementary Table S10. Software and Algorithms**

| Software                                   | Version               | Supplier                                                                                          |
|--------------------------------------------|-----------------------|---------------------------------------------------------------------------------------------------|
| BioRender                                  | -                     | BioRender                                                                                         |
| DIA-NN                                     | 1.8.2. beta 22 and 27 | <a href="https://github.com/vdemichev/DiaNN">https://github.com/vdemichev/DiaNN</a> <sup>43</sup> |
| GraphPad Prism                             | Version 8.4.3         | GraphPad Software, LLC.                                                                           |
| ImageJ                                     | 2.0.0-rc-69/1.52p     | National Institutes of Health                                                                     |
| Image Lab Software                         | 6.0.1                 | BIO-RAD                                                                                           |
| Perseus                                    | 1.6.50, 2.0.11        | <a href="https://maxquant.net/perseus/">https://maxquant.net/perseus/</a> <sup>44</sup>           |
| PyMOL: The PyMOL molecular Graphics System | Version 3.0           | Schrödinger, LLC                                                                                  |
| Resolve3D softWoRx-Acquire                 | Version: 7.2.0        | Release RC4                                                                                       |
| Rstudio                                    | version 2023.06.0     | Posit Software, PBC                                                                               |
| SnapGene                                   | 7.1.2                 | GSL Biotech LLC                                                                                   |

185
