# Supplementary material for: CUL4A-DDB1-DCAF10 is an N-recognin for N-terminally acetylated Src kinases
Source: Research Square preprint supplement (doi:10.21203/rs.3.rs-6184818/v1), 2025-04-01
Supplement: Supplementary file 2 [file 107f21766dfe75ff928da27e.xlsx]

## Sheet: acLYN_LYN
Significant	-LOG(P-value)	Difference	Protein.Group	Protein.Ids	Protein.Names	Genes	First.Protein.Description	acLYN_1	acLYN_2	acLYN_3	LYN_1	LYN_2	LYN_3
+	6.87359	4.4465	Q5QP82	A0A0A0MQT4;Q5QP82-2;Q5QP82	DCA10_HUMAN	DCAF10	DDB1- and CUL4-associated factor 10	24.9472	24.8287	24.7735	20.4273	20.3676	20.415
+	4.48759	1.87687	P11498	P11498	PYC_HUMAN	PC	Pyruvate carboxylase, mitochondrial	24.191	24.1383	24.2626	22.4573	22.1691	22.3349
+	6.29582	3.33447	Q13085	Q13085-2;Q13085-3;Q13085-4;Q13085	ACACA_HUMAN	ACACA	Acetyl-CoA carboxylase 1	25.8796	25.7184	25.8207	22.4631	22.5307	22.4214
+	3.20421	-1.7343	Q96DX7	Q96DX7	TRI44_HUMAN	TRIM44	Tripartite motif-containing protein 44	21.7647	21.8291	22.1088	23.3896	23.8869	23.6291
	0.38348	0.129532	A0A024R4E5;C9J5E5;C9JBS3;C9JEJ8;C9JES8;C9JHN6;C9JHS7;C9JHZ8;C9JIZ1;C9JK79;C9JT62;C9JZI8	C9J5E5;C9JZI8;C9JT62;C9JK79;C9JIZ1;C9JHS7;C9JHN6;C9JHZ8;C9JBS3;C9JEJ8;C9JES8;A0A024R4E5	A0A024R4E5_HUMAN;C9J5E5_HUMAN;C9JBS3_HUMAN;C9JEJ8_HUMAN;C9JES8_HUMAN;C9JHN6_HUMAN;C9JHS7_HUMAN;C9JHZ8_HUMAN;C9JIZ1_HUMAN;C9JK79_HUMAN;C9JT62_HUMAN;C9JZI8_HUMAN	HDLBP	Isoform of Q00341, High density lipoprotein binding protein	22.5171	22.3361	22.2066	22.0044	22.3202	22.3467
	0.832427	0.845171	A0A087WTB7	A0A087WTB7	A0A087WTB7_HUMAN	SCAF11	Isoform of Q99590, SR-related CTD associated factor 11 (Fragment)	22.2102	21.7105	21.175	21.5576	20.343	20.6595
	0.119518	-0.219604	A0A087WZ13	A0A087WZ13	A0A087WZ13_HUMAN	RAVER1	Isoform of Q8IY67, Ribonucleoprotein, PTB binding 1	18.7918	18.9121	18.3321	20.1628	18.495	18.037
	0.479937	0.883308	A0A0A0MQS2;F5H0Q6;K7EM61	A0A0A0MQS2;K7EM61;F5H0Q6	A0A0A0MQS2_HUMAN;F5H0Q6_HUMAN;K7EM61_HUMAN	CLASRP	Isoform of Q8N2M8, CLK4 associating serine/arginine rich protein	21.4736	22.9965	21.9653	19.94	21.8695	21.976
	1.51601	0.798939	A0A0C4DG89	A0A0C4DG89	A0A0C4DG89_HUMAN	DDX46	Isoform of Q7L014, RNA helicase	23.6781	23.8866	23.3248	22.5714	22.7445	23.1769
	0.25144	0.205105	A0A0G2JJ55	Q96QC4;A0A024RCL3;A0A0G2JK11;A0A0G2JJ55	A0A0G2JJ55_HUMAN	MICA	Isoform of Q29983, MHC class I polypeptide-related sequence A	22.3995	22.307	22.9721	21.9548	22.8079	22.3007
	0.013474	-0.0130558	A0A140TA76;K7EMZ9	A0A140TA76;K7EMZ9	A0A140TA76_HUMAN;K7EMZ9_HUMAN	LSM14A	Isoform of Q8ND56, Protein LSM14 homolog A (Fragment)	26.7565	25.8671	26.0088	26.5419	26.1263	26.0033
	0.525612	0.326633	A0A1B0GVL4	A0A1B0GVL4	A0A1B0GVL4_HUMAN	FAM193A	Isoform of P78312, Family with sequence similarity 193 member A	22.0341	22.2295	22.2564	21.3313	22.2055	22.0032
	0.312486	0.997041	A0A1W2PS58;K7EPI4	A0A1W2PS58;K7EPI4	A0A1W2PS58_HUMAN;K7EPI4_HUMAN	GFAP	Isoform of P14136, Glial fibrillary acidic protein (Fragment)	24.7477	21.4475	21.0567	20.5925	21.1466	22.5216
	0.168308	-0.0793311	A0A2R8Y424	A0A2R8Y424	A0A2R8Y424_HUMAN	PRRC2C	Isoform of Q9Y520, Proline rich coiled-coil 2C (Fragment)	22.1579	22.3429	22.6721	22.5929	22.5349	22.2832
	0.366144	-0.157234	A0A2R8Y5A6;A0A2R8YDM9;A0A2R8YGV1	A0A2R8Y5A6;A0A2R8YGV1;A0A2R8YDM9	A0A2R8Y5A6_HUMAN;A0A2R8YDM9_HUMAN;A0A2R8YGV1_HUMAN	ATXN2	Isoform of Q99700, Ataxin 2	22.48	22.3367	22.1909	22.3729	22.2985	22.8079
	0.136964	-0.157727	A0A3B3ISF0;A0A3B3IT29	A0A3B3ISF0;A0A3B3IT29	A0A3B3ISF0_HUMAN;A0A3B3IT29_HUMAN	LARP1B	Isoform of Q659C4, La ribonucleoprotein 1B	22.7635	22.3495	22.7039	23.402	22.8759	22.0122
	1.17111	0.356392	A0A494BZV2	H0Y7E2;H0Y2S9;A0A494BZV2	A0A494BZV2_HUMAN	MPRIP	Isoform of Q6WCQ1, Myosin phosphatase Rho interacting protein	20.8284	20.8001	20.7198	20.1502	20.5967	20.5323
	0.513852	0.292509	A0A494C0Y9;A0A8V8TNY3	A0A8V8TNY3;A0A494C0Y9	A0A494C0Y9_HUMAN;A0A8V8TNY3_HUMAN	FAM120A	Isoform of Q9NZB2, Family with sequence similarity 120A (Fragment)	25.5686	24.9685	24.9924	25.1924	24.7182	24.7414
	0.857554	0.540302	A0A590UJL8	A0A590UJL8	A0A590UJL8_HUMAN	H3-7	Isoform of Q5TEC6, H3.7 histone (putative) (Fragment)	26.5291	26.0278	25.846	25.4756	26.002	25.3045
	0.138234	0.102922	A0A5F9UQ55	A0A5F9UQ55	A0A5F9UQ55_HUMAN	FBXW4	Isoform of P57775, F-box and WD repeat domain containing 4	21.6148	21.3387	20.9209	20.8149	21.3545	21.3961
	0.904866	0.256259	A0A6Q8PFE4	A0A6Q8PFE4;A0A804HKV3	A0A6Q8PFE4_HUMAN	ACTB	Isoform of P60709, Actin beta	23.4024	23.5692	23.195	23.1993	22.9814	23.2173
	0.655891	0.227428	A0A7I2YQV8	A0A7I2YQV8	A0A7I2YQV8_HUMAN	SYNCRIP	Isoform of O60506, Synaptotagmin binding cytoplasmic RNA interacting protein	24.9985	24.5916	24.5282	24.3923	24.578	24.4659
	1.07904	0.546865	A0A804HKC3	A0A804HKC3	A0A804HKC3_HUMAN	PRRC2B	Isoform of Q5JSZ5, Proline rich coiled-coil 2B (Fragment)	23.8655	23.6036	23.4866	22.8055	22.9991	23.5104
	0.471291	-0.254466	A0A8Q3WMA7	A0A8Q3WMA7	A0A8Q3WMA7_HUMAN	SFPQ	Isoform of P23246, Splicing factor proline and glutamine rich	22.5197	22.5334	21.8607	22.4622	22.7038	22.5112
	0.228734	-0.159023	A0A8V8TMQ1;A0A8V8TNP6	A0A8V8TNP6;A0A8V8TMQ1	A0A8V8TMQ1_HUMAN;A0A8V8TNP6_HUMAN	FXR1	Isoform of P51114, RNA-binding protein FXR1	25.4569	24.5685	24.8322	25.1867	24.9739	25.1739
	0.158527	0.158244	A0A8V8TR54;H7C0J3	H7C3H7;H7C0J3;A0A8V8TR54	A0A8V8TR54_HUMAN;H7C0J3_HUMAN	CHD3	Isoform of Q12873, DNA helicase	22.4517	21.412	21.4637	21.9344	21.4183	21.5
	1.41856	0.567105	A0A994J4J5;E9PQ56;H0YEM1	H0YEM1;E9PQ56;A0A994J4J5	A0A994J4J5_HUMAN;E9PQ56_HUMAN;H0YEM1_HUMAN	PUF60	Isoform of Q9UHX1, Poly(U) binding splicing factor 60	23.9791	24.1656	23.8222	23.1331	23.6751	23.4573
	0.0792807	0.113967	A0A994J4R3	A0A994J4R3	A0A994J4R3_HUMAN	H1-10	Isoform of Q92522, H1.10 linker histone	22.4778	22.5836	23.0395	21.962	22.2744	23.5226
	0.953247	0.308006	A0A994J4Y8	A0A994J4Y8	A0A994J4Y8_HUMAN	PGAM5	Isoform of Q96HS1, PGAM family member 5, mitochondrial serine/threonine protein phosphatase	22.3624	22.0778	22.0085	21.6897	22.0445	21.7904
	0.312746	0.132449	A0A994J7P9	A0A994J7P9	A0A994J7P9_HUMAN	FXR2	Isoform of P51116, FMR1 autosomal homolog 2	26.0454	26.0662	25.9619	25.554	26.0935	26.0287
	0.171858	0.184174	A0AV96;A0AV96-2	D6RFL5;D6REZ6;D6RBP6;D6RBS9;D6RA49;D6RCT1;D6R9M7;D6R9D6;A0AV96-2;A0AV96	RBM47_HUMAN	RBM47	RNA-binding protein 47	21.2166	20.6254	19.9259	20.5308	20.0898	20.5948
	0.549828	0.0919228	A0FGR8-2	A0A499FIX8;H7BXI1;A0FGR8-2;A0FGR8-4;A0FGR8-5;A0FGR8-6;A0FGR8	ESYT2_HUMAN	ESYT2	Isoform of A0FGR8, Isoform 2 of Extended synaptotagmin-2	22.796	22.7617	22.6664	22.7751	22.5949	22.5783
	0.451266	0.228476	A0JLT2	J3KR33;A0JLT2-2;A0JLT2	MED19_HUMAN	MED19	Mediator of RNA polymerase II transcription subunit 19	22.0902	21.4678	21.6934	21.3125	21.7286	21.525
	0.23873	0.117009	A1A4S6	H0Y8W5;A1A4S6	RHG10_HUMAN	ARHGAP10	Rho GTPase-activating protein 10	21.4011	21.2187	21.0892	21.4477	21.035	20.8753
	0.0212225	-0.0210094	A1L0T0	M0R1B5;M0R026;E9PJS0;A1L0T0	HACL2_HUMAN	ILVBL	2-hydroxyacyl-CoA lyase 2	20.6441	19.9072	20.2998	19.8352	20.6997	20.3791
	0.178796	-0.190254	A1L390;A1L390-3	A0A8C8NWT4;A0A0U1RR71;A1L390-3;A1L390	PKHG3_HUMAN	PLEKHG3	Pleckstrin homology domain-containing family G member 3	21.5431	21.4153	21.2546	22.2899	21.5742	20.9197
	0.654781	0.478066	A1X283	A0A1B0GUF2;G3V144;A1X283	SPD2B_HUMAN	SH3PXD2B	SH3 and PX domain-containing protein 2B	20.9845	20.8666	20.8776	21.0178	20.394	19.8827
	0.572156	0.317699	A2RUR9;A2RUR9-3	A6NG92;C9JT67;A2RUR9-3;A0A8V8TL21;A2RUR9;Q3MJ40	C144A_HUMAN	CCDC144A	Coiled-coil domain-containing protein 144A	23.1439	22.8185	23.059	22.2768	22.7318	23.0597
	0.454217	0.19954	A3KMH1;A3KMH1-3	A3KMH1-2;A3KMH1-3;A3KMH1	VWA8_HUMAN	VWA8	von Willebrand factor A domain-containing protein 8	18.9323	19.306	18.6524	18.7638	18.7631	18.7652
	0.329352	-0.122347	A3KN83;A3KN83-2	A3KN83-2;A3KN83-3;A3KN83	SBNO1_HUMAN	SBNO1	Protein strawberry notch homolog 1	22.2033	22.0933	21.9963	22.3607	21.9385	22.3608
	0.518743	-0.313375	A4D1E9	A4D1E9-2;A4D1E9	GTPBA_HUMAN	GTPBP10	GTP-binding protein 10	21.5284	22.1211	22.0708	22.4469	22.3608	21.8528
	0.285631	-0.057717	A4UGR9-8	A0A5F9ZH43;A4UGR9-2;A4UGR9-3;A4UGR9-8;A4UGR9	XIRP2_HUMAN	XIRP2	Isoform of A4UGR9, Isoform 8 of Xin actin-binding repeat-containing protein 2	23.3044	23.2204	23.2371	23.176	23.4439	23.3152
	0.982321	-0.163194	A5YKK6	H3BMZ2;A5YKK6-2;A5YKK6-3;A5YKK6	CNOT1_HUMAN	CNOT1	CCR4-NOT transcription complex subunit 1	24.1671	24.209	24.2438	24.2772	24.5176	24.3147
	0.319368	-0.228512	A6NGR9	E9PPP7;A6NGR9	MROH6_HUMAN	MROH6	Maestro heat-like repeat-containing protein family member 6	19.8884	19.0766	19.0467	19.6909	19.3684	19.6378
	0.30208	0.426146	A6NHQ2	A6NHQ2	FBLL1_HUMAN	FBLL1	rRNA/tRNA 2'-O-methyltransferase fibrillarin-like protein 1	25.856	24.5254	25.353	24.5643	24.2479	25.6438
	0.607394	-0.298386	A6NJ78	A6NJ78	MET15_HUMAN	METTL15	12S rRNA N4-methylcytidine (m4C) methyltransferase	19.8969	19.3242	19.8674	20.0427	19.771	20.17
	0.608118	-0.358534	A6NNL0;B1AL46;Q5VT03;Q8IVF1	Q8IVF1;A6NNL0;Q5VT03;B1AL46	NTM2A_HUMAN;NTM2B_HUMAN;NTM2D_HUMAN;NTM2E_HUMAN	NUTM2A;NUTM2B;NUTM2D;NUTM2E	NUT family member 2B	27.1192	27.307	27.9794	27.7855	27.9096	27.7861
	0.1247	0.0461826	A8MV65;A8MV65-2	H7C571;A8MV65-2;A8MV65	VGLL3_HUMAN	VGLL3	Transcription cofactor vestigial-like protein 3	20.6686	20.7328	20.5712	20.7224	20.3577	20.7539
	1.30397	-0.527809	A8MWD9;P62308	C9JVQ0;Q49AN9;F5H013;A8MWD9;P62308	RUXGL_HUMAN;RUXG_HUMAN	SNRPG;SNRPGP15	Putative small nuclear ribonucleoprotein G-like protein 15	27.4036	27.159	27.7794	27.9566	28.0843	27.8844
	0.0826856	-0.103043	A8TX70;A8TX70-2	A8TX70-2;H0Y393;A8TX70	CO6A5_HUMAN	COL6A5	Collagen alpha-5(VI) chain	21.0686	20.9876	20.5684	20.2215	21.6419	21.0703
	1.50689	-0.589512	B3EWG3;B3EWG5;B3EWG6	B3EWG6;B3EWG5;B3EWG3	FM25A_HUMAN;FM25C_HUMAN;FM25G_HUMAN	FAM25A;FAM25C;FAM25G	Protein FAM25A	20.2762	20.0178	20.5356	21.0307	20.6797	20.8877
	0.49731	0.505361	B4DT23	B4DT23	B4DT23_HUMAN	FAM98A	Isoform of Q8NCA5, Family with sequence similarity 98 member A	17.8337	17.4489	17.0786	17.6375	16.3012	16.9065
	0.224403	-0.556284	B7ZAQ6;B7ZAQ6-2;B7ZAQ6-3;P0CG08	B7ZAQ6-2;B7ZAQ6-3;P0CG08;B7ZAQ6	GPHRA_HUMAN;GPHRB_HUMAN	GPR89A;GPR89B	Golgi pH regulator A	20.2255	20.0468	19.5191	19.7062	19.3863	22.3678
	0.670517	0.1625	C9J6P4;H7C5K1	C9J6P4;H7C5K1	C9J6P4_HUMAN;H7C5K1_HUMAN	ZC3HAV1	Isoform of Q7Z2W4, Zinc finger CCCH-type containing, antiviral 1	20.9298	21.0398	21.2986	20.9506	20.9175	20.9127
	0.215643	0.141816	E7ERS3	E7ERS3	E7ERS3_HUMAN	ZC3H18	Isoform of Q86VM9, Zinc finger CCCH-type containing 18	20.6798	21.4579	21.1166	20.7203	20.9718	21.1367
	0.886906	0.991334	E7ETH6	Q8TAU3-2;M0R1N2;M0R230;M0QY62;Q96SQ5-2;A0A494C1I7;B7Z6K7;Q96SQ5;Q8TAU3;E7ETH6	Z587B_HUMAN	ZNF587B	Zinc finger protein 587B	21.3721	20.9552	20.0288	20.3169	19.9015	19.1637
	0.280769	0.0617886	E9PAV3	H0YHX9;F8VZJ2;F8W0W4;E9PAV3-2;Q13765;A0A7I2V2K5;A0A7I2V473;E9PAV3	NACAM_HUMAN	NACA	Nascent polypeptide-associated complex subunit alpha, muscle-specific form	30.5813	30.7678	30.8434	30.6711	30.595	30.741
	0.88278	0.429491	E9PB61	E9PB61	E9PB61_HUMAN	ALYREF	Isoform of Q86V81, Aly/REF export factor	27.8618	27.2383	27.448	26.8233	27.18	27.2563
	0.887463	0.670539	E9PM36	E9PM36	E9PM36_HUMAN	RPS2	Isoform of P15880, 40S ribosomal protein S2	18.6494	19.0215	18.2234	18.4856	17.6212	17.776
	0.16702	0.172205	E9PMS6;H0YDG6	H0YDG6;E9PMS6	E9PMS6_HUMAN;H0YDG6_HUMAN	LMO7	Isoform of Q8WWI1, LIM domain 7	21.0823	20.5848	20.3589	20.943	20.6973	19.8691
	0.269016	0.0797564	E9PRG8	A0A494BXY3;E9PLD3;E9PRG8	CK098_HUMAN	C11orf98	Uncharacterized protein C11orf98	27.3685	27.1987	27.1456	26.9763	27.1856	27.3116
	0.345941	-0.451743	F5GXR3	F5GXR3	F5GXR3_HUMAN	PTMS	Isoform of P20962, Parathymosin	21.924	21.2233	20.3474	21.467	21.2036	22.1794
	1.04491	0.470927	F6RGN5	F6RGN5	F6RGN5_HUMAN	SLC25A10	Isoform of Q9UBX3, Solute carrier family 25 member 10	24.1943	24.3769	23.9737	23.3606	23.9281	23.8434
	0.113282	-0.0765705	F8VR69	F8VR69	F8VR69_HUMAN	RPL6	Isoform of Q02878, 60S ribosomal protein L6 (Fragment)	23.615	23.1624	23.4764	23.4929	23.1395	23.8511
	0.000538867	0.000618617	F8VWZ5	F8VWZ5	F8VWZ5_HUMAN	HLX	Isoform of Q14774, H2.0 like homeobox (Fragment)	24.7363	24.9192	24.5939	24.0258	25.0793	25.1424
	0.366045	-0.213552	F8W543	F8W543	F8W543_HUMAN	NAP1L1	Isoform of P55209, Nucleosome assembly protein 1 like 1	25.2534	25.3363	25.8623	25.9924	25.4867	25.6136
	0.279292	-0.569586	F8W726;Q5VU77	F8W726;Q5VU77	F8W726_HUMAN;Q5VU77_HUMAN	UBAP2L	Isoform of Q14157, Ubiquitin associated protein 2 like	25.5414	23.1272	24.9916	24.3878	25.3809	25.6003
	0.263151	0.201893	G8JLI2	G8JLI2	G8JLI2_HUMAN	PARPBP	Isoform of Q9NWS1, PCNA-interacting partner	20.1454	19.1682	19.323	19.3746	19.261	19.3953
	2.31861	-0.391032	H0Y4V9	H0Y641;H0Y4V9	H0Y4V9_HUMAN	LARP4B	Isoform of Q92615, La ribonucleoprotein 4B (Fragment)	21.6092	21.7869	21.7715	22.0389	22.1299	22.1719
	0.981145	-0.350064	H0YBW1	H0YBW1	H0YBW1_HUMAN	LARP1	Isoform of Q6PKG0, La ribonucleoprotein 1, translational regulator (Fragment)	21.4835	21.3822	21.2915	21.7904	21.4394	21.9777
	0.940588	-0.953121	H0YF32	H0YF32	H0YF32_HUMAN	RPS3	Isoform of P23396, Ribosomal protein S3 (Fragment)	22.4957	23.5154	24.0799	24.4958	24.2987	24.1558
	0.903189	0.508156	H0YGG4	H0YGG4	H0YGG4_HUMAN	EIF2B1	Isoform of Q14232, Translation initiation factor eIF-2B subunit alpha (Fragment)	23.0337	23.1367	23.009	22.0326	22.8174	22.8051
	0.157772	-0.0887852	H3BQA8	H3BQA8	H3BQA8_HUMAN	SKIC8	Isoform of Q9GZS3, SKI8 subunit of superkiller complex (Fragment)	23.4106	23.4745	23.1344	23.0847	23.7103	23.4909
	0.620175	-0.184799	H7BY16	H7BY16	H7BY16_HUMAN	NCL	Isoform of P19338, Nucleolin	23.8453	23.7979	23.5154	24.061	23.8862	23.766
	0.612608	0.538844	H7BY36	H7BY36	H7BY36_HUMAN	EWSR1	Isoform of Q01844, EWS RNA binding protein 1 (Fragment)	27.03	26.1731	25.7185	25.6045	25.9129	25.7877
	0.928018	-0.163256	H7C0N4	H7C561;H7C0N4	H7C0N4_HUMAN	SF1	Isoform of Q15637, Splicing factor 1 (Fragment)	22.8873	22.8429	23.0534	23.1935	23.0502	23.0297
	1.31633	-0.482223	H7C2T5	H7C2T5	H7C2T5_HUMAN	POFUT2	Isoform of Q9Y2G5, GDP-fucose protein O-fucosyltransferase 2 (Fragment)	23.0876	23.56	23.5516	23.9878	23.9116	23.7465
	0.75179	0.175369	J3KNZ9	J3KNZ9	J3KNZ9_HUMAN	FBRS	Isoform of Q9HAH7, Fibrosin	20.6911	20.4589	20.4093	20.4665	20.2578	20.3089
	0.637298	0.826174	J3QR07	J3QR07	J3QR07_HUMAN	YTHDC1	Isoform of Q96MU7, YTH domain-containing family protein	22.5521	22.2739	22.7571	22.3441	22.1908	20.5697
	0.182632	-0.172805	K7EQJ5	K7EQJ5	K7EQJ5_HUMAN	RPS15	Isoform of P62841, 40S ribosomal protein S15	22.7355	21.6764	22.5096	22.3221	22.314	22.8038
	0.376167	-0.155616	M0QZM1	M0QZM1	M0QZM1_HUMAN	HNRNPM	Isoform of P52272, Heterogeneous nuclear ribonucleoprotein M (Fragment)	24.9181	24.7716	24.7376	25.2874	24.7482	24.8585
	1.03922	-0.1573	O00139-2	A0A6Q8PFA6;A0A6Q8PG37;A0A6Q8PGH7;A0A6Q8PGG1;A0A6Q8PH57;D6R9M0;O00139-5;O00139-1;O00139-2;O00139-4;O00139	KIF2A_HUMAN	KIF2A	Isoform of O00139, Isoform 2 of Kinesin-like protein KIF2A	22.5505	22.6581	22.616	22.6999	22.7034	22.8932
	0.191436	-0.10869	O00148	A0A0D9SEM9;K7EQN7;O00148-2;O00148-3;O00148	DX39A_HUMAN	DDX39A	ATP-dependent RNA helicase DDX39A	20.7052	21.0085	21.3194	21.3708	21.0133	20.9752
	1.12411	0.184873	O00159-2	O00159-2;I3L3Y6;I3L3F5	MYO1C_HUMAN	MYO1C	Isoform of O00159, Isoform 2 of Unconventional myosin-Ic	26.4208	26.3689	26.4301	26.3714	26.1546	26.1392
	0.126174	0.0469386	O00159-3	O00159-2;O00159-3;I3L501;I3L3Y6;I3L3F5;F5H6E2;O00159	MYO1C_HUMAN	MYO1C	Isoform of O00159, Isoform 3 of Unconventional myosin-Ic	28.8265	28.9707	29.1159	29.1121	28.9211	28.7391
	0.384881	0.118368	O00161	H3BV99;H3BQY9;H3BP15;H3BM38;O00161	SNP23_HUMAN	SNAP23	Synaptosomal-associated protein 23	21.3278	21.6646	21.4648	21.4679	21.4355	21.1988
	0.487314	0.139743	O00165;O00165-2	O00165-2;O00165-3;O00165-5;A0A8V8TKG6;A0A8V8TKI6;A0A8V8TKI8;E9PIQ7;A0A8V8TLX9;O00165	HAX1_HUMAN	HAX1	HCLS1-associated protein X-1	21.5939	21.4238	21.5908	21.1739	21.4961	21.5192
	0.334365	0.0797164	O00178	B0QY59;O00178	GTPB1_HUMAN	GTPBP1	GTP-binding protein 1	23.4279	23.3626	23.2066	23.3489	23.109	23.3001
	1.09436	-0.185563	O00203	A0A0S2Z4Z4;A0A2R8Y2A8;A0A590UKC4;A0A590UJU0;A0A590UJU7;A0A590UK04;A0A590UJE5;A0A590UJ60;O00203-3;A0A8Q3WKF8;A0A8Q3WKI5;A0A8Q3WKJ9;Q13367-3;Q13367-4;A0A8Q3WKK0;A0A8Q3WKN2;A0A8Q3WL34;A0A8Q3SIM7;A0A8Q3SIS1;A0A8Q3SHR2;A0A8Q3SHS3;A0A8Q3SHU2;A0A8Q3SHW6;A0A8Q3SHP3;A0A8Q3SI03;A0A5F9UJV3;Q13367;O00203	AP3B1_HUMAN	AP3B1	AP-3 complex subunit beta-1	25.8711	25.6295	25.7031	25.9855	25.9105	25.8644
	0.157785	-0.103394	O00231;O00231-2	O00231-2;O00231	PSD11_HUMAN	PSMD11	26S proteasome non-ATPase regulatory subunit 11	21.5999	22.0944	21.9307	22.3719	21.8179	21.7454
	0.0535339	-0.0364602	O00232	O00232	PSD12_HUMAN	PSMD12	26S proteasome non-ATPase regulatory subunit 12	23.2106	23.4952	23.005	22.9047	23.4067	23.5087
	0.275406	0.132622	O00257	O00257	CBX4_HUMAN	CBX4	E3 SUMO-protein ligase CBX4	24.1493	23.8547	23.5564	23.8997	23.6164	23.6464
	0.429819	0.0698827	O00267	O00267-2;O00267	SPT5H_HUMAN	SUPT5H	Transcription elongation factor SPT5	25.4305	25.5066	25.4765	25.2729	25.4396	25.4914
	1.01414	-0.346868	O00303	H0YDT6;O00303	EIF3F_HUMAN	EIF3F	Eukaryotic translation initiation factor 3 subunit F	28.5969	28.8597	29.146	29.1693	29.2177	29.2562
	1.14083	0.40583	O00311	O00311	CDC7_HUMAN	CDC7	Cell division cycle 7-related protein kinase	22.759	22.7447	22.4861	22.4758	21.9914	22.3052
	0.0718618	0.0784429	O00401	O00401	WASL_HUMAN	WASL	Actin nucleation-promoting factor WASL	22.0604	21.7784	20.8751	21.7556	21.4214	21.3016
	0.33502	-0.0583159	O00410	O00410-2;O00410-3;H0Y8C6;O00410	IPO5_HUMAN	IPO5	Importin-5	23.4728	23.668	23.5728	23.5449	23.6958	23.6479
	0.0609335	-0.0103868	O00411	O00411	RPOM_HUMAN	POLRMT	DNA-directed RNA polymerase, mitochondrial	24.8151	24.7279	24.6719	24.8315	24.6953	24.7193
	0.135947	-0.0368811	O00422-2	O00422-2;U3KQ12;O00422	SAP18_HUMAN	SAP18	Isoform of O00422, Isoform 2 of Histone deacetylase complex subunit SAP18	26.0097	25.7869	25.8256	25.7722	26.0184	25.9422
	0.564035	0.0950445	O00425	O00425-2;O00425	IF2B3_HUMAN	IGF2BP3	Insulin-like growth factor 2 mRNA-binding protein 3	26.9101	26.8713	27.0667	26.8585	26.9303	26.7742
	0.908479	-0.548444	O00442	A6NIC1;O00442-2;O00442	RTCA_HUMAN	RTCA	RNA 3'-terminal phosphate cyclase	22.6217	22.6792	23.4836	23.4499	23.5638	23.4162
	0.377828	0.127149	O00443	O00443	P3C2A_HUMAN	PIK3C2A	Phosphatidylinositol 4-phosphate 3-kinase C2 domain-containing subunit alpha	21.7253	21.5296	21.4384	21.6568	21.3748	21.2803
	0.0115413	-0.00249036	O00458	O00458-2;A0A6Q8PH75;A0A6Q8PF03;A0A6Q8PHN0;C9JNM6;A0A6Q8PHD2;O00458	IFRD1_HUMAN	IFRD1	Interferon-related developmental regulator 1	25.2919	25.2742	25.4865	25.3506	25.3911	25.3184
	0.297833	0.102435	O00461	F8W785;O00461	GOLI4_HUMAN	GOLIM4	Golgi integral membrane protein 4	21.9555	21.6662	21.5934	21.5944	21.5136	21.7998
	2.02059	0.446493	O00468-3;O00468-6	O00468-2;O00468-3;O00468-4;O00468-5;O00468-6;O00468-7;A0A494C1I6;A0A494C0G5;A0A087X208;O00468	AGRIN_HUMAN	AGRN	Isoform of O00468, Isoform 3 of Agrin	21.97	22.0487	22.2091	21.5145	21.635	21.7388
	0.329859	0.336245	O00479	O00479;P05204	HMGN4_HUMAN	HMGN4	High mobility group nucleosome-binding domain-containing protein 4	23.6975	23.4695	22.6578	23.4693	22.5373	22.8094
	0.99188	-0.283062	O00483	O00483	NDUA4_HUMAN	NDUFA4	Cytochrome c oxidase subunit NDUFA4	23.9873	23.7426	23.9282	24.3475	23.9635	24.1962
	0.094747	0.0538807	O00488	A9J4F5;O00488	ZN593_HUMAN	ZNF593	Zinc finger protein 593	25.4508	25.4553	25.0373	25.5393	25.0318	25.2107
	1.82636	-0.711114	O00505	H7C4F6;A0A7I2V340;O00629;O00505	IMA4_HUMAN	KPNA3	Importin subunit alpha-4	23.4088	23.5354	23.5474	23.8988	24.2502	24.4759
	1.25539	-0.131474	O00541;O00541-2	B5MCF9;O00541-2;O00541	PESC_HUMAN	PES1	Pescadillo homolog	28.201	28.2123	28.2919	28.3181	28.3356	28.4458
	0.122353	-0.0384185	O00560	E9PBU7;B4DHN5;O00560-2;G5EA09;O00560	SDCB1_HUMAN	SDCBP	Syntenin-1	25.4144	25.2993	25.1862	25.3908	25.1561	25.4683
	0.170806	-0.0685959	O00566	U3KQ48;A0A8Q3WKH7;A0A8Q3WK70;O00566	MPP10_HUMAN	MPHOSPH10	U3 small nucleolar ribonucleoprotein protein MPP10	25.2891	25.4577	25.3859	25.191	25.4591	25.6884
	0.293525	0.0472298	O00567	H0YDU4;H0Y653;A0A494C128;O00567	NOP56_HUMAN	NOP56	Nucleolar protein 56	26.2464	26.2778	26.1456	26.2782	26.1131	26.1368
	0.717343	-0.177052	O00571	C9J8G5;C9J081;A0A2R8Y7T2;A0A2R8Y4A4;A0A2R8Y645;A0A2R8Y5G6;A0A2R8Y4D2;A0A2R8YDT5;A0A2R8YDH3;A0A2R8YCW1;A0A2R8YFS5;A0A2R8YFR4;A0A2R8YF78;A0A2U3TZJ9;F6S8Q4;A0A0D9SG12;A0A0D9SF53;A0A0D9SFB3;O00571-2;O15523-2;O15523-3;O15523;O00571	DDX3X_HUMAN	DDX3X	ATP-dependent RNA helicase DDX3X	28.1906	28.0037	27.8218	28.2482	28.1187	28.1804
	1.49734	-0.98837	O00629	H7C4F6;A0A7I2YQ95;A0A7I2V333;A0A7I2V340;O00629	IMA3_HUMAN	KPNA4	Importin subunit alpha-3	21.911	21.6624	21.9684	22.2824	22.9573	23.2672
	0.724494	-1.07807	O00712-6	A0A2R8Y7V8;A0A1B0GU97;A0A1B0GWI9;A0A1B0GWJ4;A0A1B0GWB8;O00712-6;Q5VW26;Q5VW27;Q5VW30	NFIB_HUMAN	NFIB	Isoform of O00712, Isoform 6 of Nuclear factor 1 B-type	19.8861	19.6673	19.7132	22.1889	20.1369	20.1749
	0.94309	0.335071	O00712;O00712-4;O00712-5	A0A2R8Y7V8;A0A1B0GU97;A0A1B0GWI9;A0A1B0GWJ4;A0A1B0GWB8;A0A1B0GVN4;A0A1B0GW37;O00712-4;O00712-5;O00712-6;A0A0A0MRX8;Q5VW26;Q5VW27;Q5VW30;Q5VW31;U3KQE8;O00712	NFIB_HUMAN	NFIB	Nuclear factor 1 B-type	23.5969	23.5309	23.0795	23.0256	23.0407	23.1358
	0.115024	-0.0755272	O00743	O00743-2;O00743	PPP6_HUMAN	PPP6C	Serine/threonine-protein phosphatase 6 catalytic subunit	21.6652	21.0374	21.7635	21.4739	21.5127	21.7061
	3.62634	0.750626	O00767	O00767	SCD_HUMAN	SCD	Stearoyl-CoA desaturase	24.0504	24.1649	24.0369	23.3047	23.4204	23.2751
	0.143292	-0.161134	O14519	O14519-2;F5GZF0;O14519	CDKA1_HUMAN	CDK2AP1	Cyclin-dependent kinase 2-associated protein 1	19.7149	20.6894	20.9868	20.2995	20.79	20.7851
	0.982803	0.550933	O14545	O14545	TRAD1_HUMAN	TRAFD1	TRAF-type zinc finger domain-containing protein 1	20.5913	20.7068	20.0713	19.7412	19.7189	20.2565
	1.42272	-0.360083	O14579	O14579-2;M0QXB4;O14579	COPE_HUMAN	COPE	Coatomer subunit epsilon	24.4462	24.6162	24.6268	24.8313	25.1273	24.8109
	0.0279408	-0.00899951	O14617-5	A0A2R8Y4J3;O14617-4;O14617-5;A0A8V8TQW4;A0A087WYN6;O14617	AP3D1_HUMAN	AP3D1	Isoform of O14617, Isoform 5 of AP-3 complex subunit delta-1	25.9297	25.6706	25.6282	25.8504	25.7367	25.6684
	0.108942	0.0239607	O14641	Q92997-2;A0A3B3ITC6;I3L2W9;I3L2N2;I3L0M7;O14641;Q92997	DVL2_HUMAN	DVL2	Segment polarity protein dishevelled homolog DVL-2	22.8525	23.0673	22.8314	22.8564	22.8815	22.9415
	1.2527	0.088082	O14646;O14646-2	O14646-2;A0A087WVF4;O14646	CHD1_HUMAN	CHD1	Chromodomain-helicase-DNA-binding protein 1	27.7133	27.6563	27.609	27.5969	27.5514	27.566
	0.644129	0.119394	O14647	A0A1B0GTU9;A0A1B0GU59;B7Z3I4;A0A0D9SEP7;A0A0D9SGK0;A0A0D9SEU0;A0A0D9SFA3;O14647-2;O14647-3;A0A8V8TRB2;A0A8V8TQC6;O14647	CHD2_HUMAN	CHD2	Chromodomain-helicase-DNA-binding protein 2	23.6579	23.4978	23.3955	23.3795	23.3494	23.464
	0.214796	0.271465	O14681	E9PS58;E9PLB8;E9PM05;E9PK61;E9PL33;O14681-3;O14681	EI24_HUMAN	EI24	Etoposide-induced protein 2.4 homolog	20.6353	21.7504	22.1491	21.1164	20.9918	21.6122
	2.57735	-0.52894	O14730	B4E1Q4;O14730-2;O14730	RIOK3_HUMAN	RIOK3	Serine/threonine-protein kinase RIO3	22.1347	22.075	22.2767	22.5869	22.7347	22.7516
	0.951728	0.465225	O14733;O14733-2;O14733-3;O14733-4	O14733-2;O14733-3;O14733-4;O14733	MP2K7_HUMAN	MAP2K7	Dual specificity mitogen-activated protein kinase kinase 7	19.3591	19.732	19.1496	18.9823	18.6684	19.1943
	0.130612	0.0609379	O14735;O14735-3	B3KY94;O14735-3;O14735	CDIPT_HUMAN	CDIPT	CDP-diacylglycerol--inositol 3-phosphatidyltransferase	20.5972	20.9219	20.7407	20.8527	20.8182	20.4061
	3.07766	-0.580897	O14744	H0YJX6;H0YJ77;G3V5T6;O14744-2;O14744-3;O14744-4;O14744-5;O14744	ANM5_HUMAN	PRMT5	Protein arginine N-methyltransferase 5	26.8045	26.9737	26.9801	27.4934	27.5536	27.4539
	0.17027	-0.0490456	O14776;O14776-2	A0A7P0T8N8;G3V220;O14776-2;O14776	TCRG1_HUMAN	TCERG1	Transcription elongation regulator 1	22.9786	23.2617	22.9282	23.124	23.1504	23.0412
	0.185281	0.0792446	O14818	H0Y586;O14818-2;O14818	PSA7_HUMAN	PSMA7	Proteasome subunit alpha type-7	21.5084	21.3678	21.0259	21.0696	21.3297	21.2651
	0.724575	0.156853	O14828	O14828-2;O14828	SCAM3_HUMAN	SCAMP3	Secretory carrier-associated membrane protein 3	22.4693	22.3212	22.1924	22.0543	22.2385	22.2195
	0.436305	0.197548	O14880	Q5VV87;Q5VV89;O14880	MGST3_HUMAN	MGST3	Glutathione S-transferase 3, mitochondrial	22.5491	22.1391	22.362	22.1792	22.4042	21.874
	0.13783	0.0507634	O14893-5	O14893-2;O14893-3;O14893-5;H0YEL0;A0A8J9FJK1;A0A8J9FN78;G5EA29;A0A3B3IU42;O14893	GEMI2_HUMAN	GEMIN2	Isoform of O14893, Isoform 5 of Gem-associated protein 2	23.3724	23.3457	23.7579	23.3956	23.4359	23.4922
	1.00007	-0.73096	O14949	O14949	QCR8_HUMAN	UQCRQ	Cytochrome b-c1 complex subunit 8	22.0717	21.2678	21.7364	22.9145	22.0857	22.2686
	0.201649	0.0752894	O14950;P19105	J3QRS3;P19105;O14950	ML12A_HUMAN;ML12B_HUMAN	MYL12A;MYL12B	Myosin regulatory light chain 12B	28.0887	28.1786	27.9157	28.2248	27.8281	27.9043
	0.00140183	-0.000368754	O14974	H0YIM2;H0YIS3;O14974-2;O14974-3;O14974-4;O14974-5;O14974	MYPT1_HUMAN	PPP1R12A	Protein phosphatase 1 regulatory subunit 12A	25.762	25.8309	25.8791	25.9103	25.8959	25.667
	1.28472	0.357091	O14975	G3V1R7;O14975-2;O14975	S27A2_HUMAN	SLC27A2	Long-chain fatty acid transport protein 2	22.6584	22.5936	22.3023	22.0475	22.2907	22.1448
	1.72259	0.31594	O14979	O14979-2;O14979-3;A0A087WUK2;O14979	HNRDL_HUMAN	HNRNPDL	Heterogeneous nuclear ribonucleoprotein D-like	24.1621	24.0802	23.9689	23.7709	23.8512	23.6413
	0.275065	0.148854	O14980	C9J673;C9JKM9;A0A7I2YQV4;A0A7I2YQP1;A0A7I2YQX3;A0A7I2V2C5;A0A7I2V2H0;A0A7I2V2S3;A0A7I2V2Y6;A0A7I2V3J1;A0A7I2V3N0;A0A7I2V3P3;A0A7I2V3W6;A0A7I2V461;A0A7I2V4A3;O14980	XPO1_HUMAN	XPO1	Exportin-1	24.373	24.113	23.7277	24.0534	24.0093	23.7045
	0.0514654	0.0377801	O14981	O14981-2;O14981	BTAF1_HUMAN	BTAF1	TATA-binding protein-associated factor 172	21.2753	21.1207	20.7097	21.3136	21.0145	20.6642
	1.67871	-0.357437	O15013;O15013-4;O15013-5;O15013-6;O15013-7	E9PB39;H0YAN8;O15013-4;O15013-5;O15013-6;O15013-7;O15013	ARHGA_HUMAN	ARHGEF10	Rho guanine nucleotide exchange factor 10	19.7506	19.4746	19.6373	20.0216	19.8704	20.0429
	0.019174	0.00258255	O15027;O15027-5	A0A3F2YNX0;A0A3F2YNZ0;F1T0I1;X6RGP5;O15027-2;O15027-3;O15027-4;O15027-5;A0A8I5KPG1;O15027	SC16A_HUMAN	SEC16A	Protein transport protein Sec16A	23.2719	23.4194	23.3536	23.3578	23.3183	23.3611
	0.0421647	0.0512625	O15031	E2PU09;O15031	PLXB2_HUMAN	PLXNB2	Plexin-B2	19.4391	19.4644	19.8437	18.7496	19.8492	19.9945
	0.210639	-0.0241439	O15042;O15042-2	E7ET15;H7C4V2;O15042-2;O15042-3;O15042	SR140_HUMAN	U2SURP	U2 snRNP-associated SURP motif-containing protein	27.0553	26.9563	26.9706	27.0745	27.016	26.964
	0.777687	0.97606	O15050	A0A2R8Y890;A0A2R8Y8A3;A0A2R8Y7N6;A0A2R8YEM9;O15050	TRNK1_HUMAN	TRANK1	TPR and ankyrin repeat-containing protein 1	24.5402	23.4118	22.9994	23.3649	22.2279	22.4304
	0.470288	-0.445244	O15066	O15066-2;O15066	KIF3B_HUMAN	KIF3B	Kinesin-like protein KIF3B	16.6343	16.8425	16.5718	17.9261	16.8116	16.6467
	2.11291	0.510057	O15067	H0YGH1;O15067	PUR4_HUMAN	PFAS	Phosphoribosylformylglycinamidine synthase	19.898	19.7519	19.5683	19.2433	19.288	19.1568
	0.442283	0.434153	O15091;O15091-2	O15091-2;O15091-3;O15091-4;A0A0A0MTQ0;O15091	MRPP3_HUMAN	PRORP	Mitochondrial ribonuclease P catalytic subunit	18.8574	19.0328	19.0581	18.7606	19.1407	17.7446
	1.02855	1.43021	O15117;O15117-2;O15117-3	O15117-2;O15117-3;D6RFJ5;D6RER7;O15117	FYB1_HUMAN	FYB1	FYN-binding protein 1	20.6572	21.4672	20.9923	20.8228	18.9144	19.0888
	0.104868	0.0357335	O15143	F8VXW2;C9K057;C9JEY1;A0A1W2PNV4;O15143	ARC1B_HUMAN	ARPC1B	Actin-related protein 2/3 complex subunit 1B	24.9564	25.1868	25.1903	25.2618	25.0166	24.9478
	0.18726	-0.0468318	O15144	O15144	ARPC2_HUMAN	ARPC2	Actin-related protein 2/3 complex subunit 2	24.8006	24.9756	24.8953	25.0017	25.0341	24.7762
	0.0905485	-0.0340341	O15145	O15145	ARPC3_HUMAN	ARPC3	Actin-related protein 2/3 complex subunit 3	25.2476	25.0843	25.5089	25.2361	25.4108	25.296
	0.046654	0.0368277	O15156;O15156-2	O15156-2;O15156	ZBT7B_HUMAN	ZBTB7B	Zinc finger and BTB domain-containing protein 7B	21.9417	22.2506	21.8942	22.3415	22.1171	21.5175
	0.414442	-0.162577	O15160;O15160-2	A0A2R8Y8D6;O15160-2;A0A2R8Y5D3;E7EQB9;A0A2R8YEZ4;H0Y723;O15160	RPAC1_HUMAN	POLR1C	DNA-directed RNA polymerases I and III subunit RPAC1	21.5784	21.7615	21.7367	21.8115	21.6076	22.1453
	0.0542403	-0.0210393	O15182	E5RJF8;E5RK82;E5RH67;E5RFM2;O15182	CETN3_HUMAN	CETN3	Centrin-3	21.1582	21.4007	21.5083	21.2934	21.5459	21.291
	0.552681	0.325096	O15212	O15212	PFD6_HUMAN	PFDN6	Prefoldin subunit 6	21.9451	22.1447	22.0579	22.0697	21.8738	21.2289
	0.082606	0.0295156	O15213	H0Y6G3;A0A140T9L0;A0A0G2JJL1;O15213	WDR46_HUMAN	WDR46	WD repeat-containing protein 46	24.2411	24.1727	24.1542	23.9559	24.141	24.3827
	1.95907	0.21369	O15226;O15226-2	O15226-2;A0A8I5KX72;O15226	NKRF_HUMAN	NKRF	NF-kappa-B-repressing factor	25.0555	25.023	25.0012	24.7309	24.8216	24.886
	0.372711	0.149908	O15230	O15230	LAMA5_HUMAN	LAMA5	Laminin subunit alpha-5	21.3312	21.3118	21.3463	21.4634	21.1948	20.8813
	0.606231	-0.0982138	O15234	J3KSY7;O15234	CASC3_HUMAN	CASC3	Protein CASC3	23.9964	23.897	23.9924	23.9819	24.1891	24.0095
	0.481218	-0.294152	O15235	O15235	RT12_HUMAN	MRPS12	Small ribosomal subunit protein uS12m	22.2209	22.5047	22.7692	22.4187	23.1574	22.8011
	0.062008	0.0312017	O15258	O15258	RER1_HUMAN	RER1	Protein RER1	23.4934	23.1089	23.3249	23.5222	23.2542	23.0573
	0.29645	0.138515	O15260;O15260-2	O15260-2;B7Z1G8;Q5T8U5;O15260	SURF4_HUMAN	SURF4	Surfeit locus protein 4	23.7131	23.4328	23.4841	23.6808	23.0985	23.4351
	0.695992	0.170447	O15269	A0A8I5QKQ8;A0A2R8Y763;A0A2R8Y6A2;A0A2R8Y4S0;O15269-2;A0A8I5KUM4;O15269	SPTC1_HUMAN	SPTLC1	Serine palmitoyltransferase 1	21.5913	21.7539	21.781	21.3805	21.7075	21.5269
	0.478599	0.358868	O15347	E7ES08;E7EQU1;E9PES6;O15347	HMGB3_HUMAN	HMGB3	High mobility group protein B3	24.9685	24.7635	24.1446	24.4883	24.4676	23.8441
	0.694217	-0.577891	O15355	O15355	PPM1G_HUMAN	PPM1G	Protein phosphatase 1G	18.4529	19.2317	19.5189	19.5544	20.0391	19.3437
	0.177923	0.096262	O15357	O15357	SHIP2_HUMAN	INPPL1	Phosphatidylinositol 3,4,5-trisphosphate 5-phosphatase 2	19.5744	20.0098	19.337	19.4543	19.6539	19.5243
	0.384742	0.0735137	O15371;O15371-3	B0QYA5;B0QYA6;B0QYA8;O15371-3;O15371	EIF3D_HUMAN	EIF3D	Eukaryotic translation initiation factor 3 subunit D	28.5518	28.6164	28.7392	28.5504	28.6694	28.4671
	0.319195	0.0650927	O15372	B3KS98;E5RJT0;O15372	EIF3H_HUMAN	EIF3H	Eukaryotic translation initiation factor 3 subunit H	29.1664	29.039	29.2396	29.0997	29.1772	28.9729
	0.767797	0.143643	O15381	E7EWK7;F8WF01;O15381-5;E9PH71;E9PGD8;O15381	NVL_HUMAN	NVL	Nuclear valosin-containing protein-like	27.0953	27.131	26.9608	26.8735	26.8288	27.0539
	1.20189	0.44055	O15392;O15392-2	H3BLT4;O15392-4;O15392-5;O15392-2;K7EMW2;A0A0B4J1S3;O15392	BIRC5_HUMAN	BIRC5	Baculoviral IAP repeat-containing protein 5	21.5786	21.5333	21.326	21.3128	21.0226	20.781
	1.24773	-0.721608	O15397	O15397-2;F5H244;O15397	IPO8_HUMAN	IPO8	Importin-8	21.6263	20.9031	21.1007	22.196	21.9699	21.629
	0.0807532	-0.0368538	O15417	O15417-2;H9KVB4;O15417	TNC18_HUMAN	TNRC18	Trinucleotide repeat-containing gene 18 protein	27.2348	27.0963	27.3224	26.9697	27.334	27.4603
	0.0777403	0.0625223	O15427	J3KTM6;J3KTI8;J3QQS9;J3QQV2;J3QSC3;O15427	MOT4_HUMAN	SLC16A3	Monocarboxylate transporter 4	24.5839	24.1594	23.8409	24.4276	24.1751	23.794
	0.60726	0.0881691	O15446-2	O15446-2;O15446	RPA34_HUMAN	POLR1G	Isoform of O15446, Isoform 2 of DNA-directed RNA polymerase I subunit RPA34	21.8668	21.8396	21.9732	21.783	21.7303	21.9018
	0.275446	0.0843525	O15460;O15460-2	O15460-2;O15460	P4HA2_HUMAN	P4HA2	Prolyl 4-hydroxylase subunit alpha-2	21.7769	21.7869	21.6056	21.4416	21.6612	21.8135
	0.097415	0.0285619	O15479	O15479	MAGB2_HUMAN	MAGEB2	Melanoma-associated antigen B2	23.0563	22.7621	23.0782	22.8877	22.9716	22.9517
	0.678725	0.262748	O15504	O15504-2;C9JYA1;B4DT96;O15504	NUP42_HUMAN	NUP42	Nucleoporin NUP42	22.9382	22.9556	22.5901	22.4505	22.4215	22.8237
	0.0652095	0.0413806	O15511	O15511-2;B1ALC0;O15511	ARPC5_HUMAN	ARPC5	Actin-related protein 2/3 complex subunit 5	24.1412	24.2665	23.9129	24.4555	23.8548	23.886
	0.994291	0.352314	O15514	E9PB93;E9PHV4;O15514	RPB4_HUMAN	POLR2D	DNA-directed RNA polymerase II subunit RPB4	23.6084	23.8103	23.4743	23.5418	23.1953	23.099
	0.208829	0.286587	O15541	O15541	R113A_HUMAN	RNF113A	E3 ubiquitin-protein ligase RNF113A	21.2714	20.7225	19.6591	20.7415	19.9602	20.0916
	0.569498	0.0660114	O43143	O43143	DHX15_HUMAN	DHX15	ATP-dependent RNA helicase DHX15	26.7346	26.6832	26.6983	26.5433	26.7062	26.6685
	0.358826	0.195079	O43156	O43156	TTI1_HUMAN	TTI1	TELO2-interacting protein 1 homolog	21.6811	21.3882	21.9751	21.2639	21.4224	21.7728
	1.03829	0.142242	O43159	E9PPY3;O43159	RRP8_HUMAN	RRP8	Ribosomal RNA-processing protein 8	23.5333	23.6604	23.4691	23.3701	23.3927	23.4732
	0.623015	-0.255407	O43164;O43164-2	O43164-2;O43164	PJA2_HUMAN	PJA2	E3 ubiquitin-protein ligase Praja-2	21.2881	20.7664	21.1036	21.1072	21.3667	21.4504
	0.222946	-0.165709	O43167	A0A8V8TNA6;A0A8V8TNL7;A0A8V8TLS8;A0A8V8TLT3;A0A8V8TLV5;A0A8V8TMC2;O43167-2;O43167	ZBT24_HUMAN	ZBTB24	Zinc finger and BTB domain-containing protein 24	20.0348	21.0351	20.6119	20.7484	20.7221	20.7083
	0.059927	0.00635592	O43172;O43172-2	O43172-2;O43172	PRP4_HUMAN	PRPF4	U4/U6 small nuclear ribonucleoprotein Prp4	24.8938	24.8784	24.8501	24.8998	24.7989	24.9046
	0.770797	-0.162937	O43175	A0A286YF22;A0A286YER3;A0A286YF34;A0A286YFL2;A0A286YFB2;A0A286YFM8;A0A286YFA2;A0A286YFC8;A0A2C9F2M7;O43175	SERA_HUMAN	PHGDH	D-3-phosphoglycerate dehydrogenase	23.7361	23.893	23.7301	23.7944	23.9831	24.0705
	0.497233	0.637167	O43237;O43237-2	J3KRI4;O43237-2;O43237	DC1L2_HUMAN	DYNC1LI2	Cytoplasmic dynein 1 light intermediate chain 2	21.9433	20.4988	20.5497	19.7642	20.6797	20.6364
	0.0772358	0.0490532	O43242	O43242	PSMD3_HUMAN	PSMD3	26S proteasome non-ATPase regulatory subunit 3	23.2139	22.9569	22.7538	23.2247	22.9489	22.6038
	0.904566	-0.640937	O43248	J3KMZ0;O43248	HXC11_HUMAN	HOXC11	Homeobox protein Hox-C11	22.7301	23.2969	23.7936	23.6725	24.0058	24.065
	0.905297	0.408728	O43251-6;O43251-8	B0QYV1;A0A0G2JRD1;A0A0G2JRA5;O43251-2;O43251-3;O43251-5;O43251-6;O43251-8;S4R3K7;A0A8Q3WKT3;A0A8Q3SI58;O43251-10;O43251	RFOX2_HUMAN	RBFOX2	Isoform of O43251, Isoform 6 of RNA binding protein fox-1 homolog 2	22.2194	21.9136	21.5229	21.5668	21.3596	21.5033
	0.624943	0.276851	O43264	O43264-2;F5H3C1;O43264	ZW10_HUMAN	ZW10	Centromere/kinetochore protein zw10 homolog	21.373	21.0537	20.7797	20.6294	20.7675	20.979
	0.51978	0.129478	O43290	O43290	SNUT1_HUMAN	SART1	U4/U6.U5 tri-snRNP-associated protein 1	24.6802	24.5771	24.3788	24.5377	24.3187	24.3912
	0.024197	-0.0283057	O43292	E9PPZ9;E9PQ31;O43292-2;A0A994J7N7;A0A994J7A1;A0A994J6W5;A0A994J6W8;A0A994J6X1;A0A994J6H8;A0A994J6I9;A0A994J5C8;A0A994J5D7;A0A994J4X7;A0A994J4P7;A0A994J4Q3;A0A994J3Y5;A0A994J3Z2;A0A994J3S1;A0A994J3S5;O43292	GPAA1_HUMAN	GPAA1	Glycosylphosphatidylinositol anchor attachment 1 protein	22.3816	21.817	21.2993	22.3318	21.6324	21.6186
	0.386548	-0.19372	O43293	O43293	DAPK3_HUMAN	DAPK3	Death-associated protein kinase 3	21.6802	21.6153	22.0609	22.1931	21.6688	22.0756
	0.41709	-1.57824	O43314;O43314-2	Q6PFW1-2;Q6PFW1-3;Q6PFW1-4;Q6PFW1-5;Q6PFW1-6;Q6PFW1-7;F8W9A8;D6RBU4;A0A8V8TMN4;B7WPL9;O43314-2;A0A087WZV0;A0A8J8ZH50;Q6PFW1;O43314	VIP2_HUMAN	PPIP5K2	Inositol hexakisphosphate and diphosphoinositol-pentakisphosphate kinase 2	15.2206	20.2678	19.7738	20.1727	20.0622	19.762
	0.650522	0.294461	O43324	O43324-2;D6RBD7;H0YAL7;C9J1V9;O43324	MCA3_HUMAN	EEF1E1	Eukaryotic translation elongation factor 1 epsilon-1	24.409	24.1973	23.986	24.0722	24.0622	23.5746
	0.352831	0.15064	O43390	A0A6Q8PEX7;O43390-2;O43390-4;O43390	HNRPR_HUMAN	HNRNPR	Heterogeneous nuclear ribonucleoprotein R	29.8742	29.3532	29.3461	29.4168	29.3152	29.3896
	0.274711	0.0304705	O43395	O43395	PRPF3_HUMAN	PRPF3	U4/U6 small nuclear ribonucleoprotein Prp3	25.5825	25.6378	25.6951	25.6156	25.5519	25.6565
	0.795649	-0.257541	O43427;O43427-2	O43427-2;E9PSD3;E9PJW6;O43427	FIBP_HUMAN	FIBP	Acidic fibroblast growth factor intracellular-binding protein	21.4027	21.545	21.2896	21.4397	21.8896	21.6806
	0.240357	0.153651	O43432;O43432-3;O43432-4	A0A8I5QJH9;A0A0U1RQK7;A0A8J9G7U8;O43432-4;O43432-3;A0A0A0MSA7;A0A804HJV5;A0A8I5KT99;A0A8I5KV92;O43432	IF4G3_HUMAN	EIF4G3	Eukaryotic translation initiation factor 4 gamma 3	23.3847	22.948	22.925	23.1491	23.1207	22.5269
	0.367114	0.184076	O43447	H0YEL5;C9JQD4;O43447-2;A0A7I2YQS4;O43447	PPIH_HUMAN	PPIH	Peptidyl-prolyl cis-trans isomerase H	23.8415	23.5653	23.1612	23.2028	23.4366	23.3765
	0.451773	0.125932	O43474;O43474-1;O43474-4	O43474-1;O43474-4;O43474	KLF4_HUMAN	KLF4	Krueppel-like factor 4	22.8221	22.5423	22.5085	22.5577	22.5733	22.364
	0.288108	-0.0487105	O43491	A0A2R8Y5B3;O43491-2;O43491-3;O43491-4;E9PK52;E9PHY5;E9PII3;A0A994J5B1;O43491	E41L2_HUMAN	EPB41L2	Band 4.1-like protein 2	22.9518	23.0344	22.9955	23.0771	23.1321	22.9186
	0.00181922	-0.00137774	O43493;O43493-3;O43493-5;O43493-7	A0A5F9UY30;O43493-3;O43493-4;O43493-5;O43493-7;O43493	TGON2_HUMAN	TGOLN2	Trans-Golgi network integral membrane protein 2	20.9122	20.4306	20.8911	20.396	21.0527	20.7893
	0.367701	0.394096	O43505	O43505	B4GA1_HUMAN	B4GAT1	Beta-1,4-glucuronyltransferase 1	24.6172	23.9276	23.2432	23.9395	23.4221	23.2441
	0.330845	-0.450925	O43567	C9J8T4;C9J383;F8WDJ5;C9JYY4;C9JYN7;C9JU37;C9JRV0;O43567	RNF13_HUMAN	RNF13	E3 ubiquitin-protein ligase RNF13	23.5902	24.4803	25.3533	24.829	25.3752	24.5723
	0.168981	0.25547	O43583	F8VVL1;O43583	DENR_HUMAN	DENR	Density-regulated protein	21.1939	20.6814	19.3684	20.256	20.4007	19.8206
	0.170252	-0.0424995	O43592	F8WDU6;O43592	XPOT_HUMAN	XPOT	Exportin-T	24.4066	24.1949	24.2961	24.4729	24.3269	24.2253
	0.0377475	-0.0322208	O43615	M0QXU7;O43615	TIM44_HUMAN	TIMM44	Mitochondrial import inner membrane translocase subunit TIM44	23.8875	23.5298	23.1423	23.9124	23.4954	23.2485
	0.889974	0.185923	O43660	O43660-2;D6RA26;O43660	PLRG1_HUMAN	PLRG1	Pleiotropic regulator 1	24.1199	24.1272	24.0911	23.7401	23.9764	24.064
	0.925169	-0.171864	O43663;O43663-4	O43663-2;O43663-3;O43663-4;O43663	PRC1_HUMAN	PRC1	Protein regulator of cytokinesis 1	22.9099	22.8269	22.864	23.2054	22.9477	22.9633
	0.933317	-0.152301	O43670;O43670-2;O43670-4	J3KS31;O43670-4;O43670-2;O43670-3;X6R4W8;J3QRS9;O43670	ZN207_HUMAN	ZNF207	BUB3-interacting and GLEBS motif-containing protein ZNF207	22.9317	22.914	22.9813	22.9671	23.0947	23.222
	0.914412	0.19642	O43674;O43674-2	E7EWP0;H0Y886;O43674-2;O43674	NDUB5_HUMAN	NDUFB5	NADH dehydrogenase [ubiquinone] 1 beta subcomplex subunit 5, mitochondrial	22.216	22.1549	22.0561	21.936	22.1044	21.7973
	0.263228	0.0346286	O43684;O43684-2	O43684-2;J3QT28;O43684	BUB3_HUMAN	BUB3	Mitotic checkpoint protein BUB3	23.4101	23.399	23.2486	23.3197	23.3285	23.3057
	0.0258614	0.0063165	O43707	H7C144;A0A8V8TL71;O43707-2;F5GXS2;O43707	ACTN4_HUMAN	ACTN4	Alpha-actinin-4	21.6135	21.8242	21.6869	21.7854	21.7186	21.6016
	0.0596017	-0.060826	O43709	O43709-2;O43709-3;O43709	BUD23_HUMAN	BUD23	Probable 18S rRNA (guanine-N(7))-methyltransferase	23.9381	23.9915	24.4782	23.6164	24.671	24.3028
	1.52338	-1.59533	O43719	O43719	HTSF1_HUMAN	HTATSF1	HIV Tat-specific factor 1	21.9133	22.6199	22.9601	23.356	24.3668	24.5565
	0.0946903	-0.0863825	O43747;O43747-2	O43747-2;O43747	AP1G1_HUMAN	AP1G1	AP-1 complex subunit gamma-1	21.0962	21.0659	20.9702	21.7738	20.745	20.8727
	0.513208	0.398942	O43776	K7EIU7;K7EJ19;O43776-2;K7EQ35;O43776	SYNC_HUMAN	NARS1	Asparagine--tRNA ligase, cytoplasmic	22.8971	22.5614	22.2623	22.5577	22.3541	21.6123
	0.451091	0.103525	O43795	H7C2Y7;E9PDF6;O43795-2;O43795	MYO1B_HUMAN	MYO1B	Unconventional myosin-Ib	27.1161	27.2794	27.3385	27.2435	27.1803	26.9996
	0.969252	0.242149	O43795-2	O43795-2	MYO1B_HUMAN	MYO1B	Isoform of O43795, Isoform 2 of Unconventional myosin-Ib	25.4362	25.2572	25.4156	24.9226	25.2292	25.2307
	0.169367	0.116547	O43809	O43809	CPSF5_HUMAN	NUDT21	Cleavage and polyadenylation specificity factor subunit 5	30.0324	29.3636	29.2437	29.5905	29.2978	29.4016
	0.182661	0.0488478	O43818	O43818	U3IP2_HUMAN	RRP9	U3 small nucleolar RNA-interacting protein 2	23.1153	23.0549	22.8468	22.9609	23.0609	22.8486
	0.569802	-0.510566	O43819	O43819	SCO2_HUMAN	SCO2	Protein SCO2 homolog, mitochondrial	19.7009	19.547	19.4992	20.8792	19.6612	19.7384
	0.41971	0.141453	O43823	A0A7P0T893;O43823	AKAP8_HUMAN	AKAP8	A-kinase anchor protein 8	22.6669	22.8333	22.6845	22.3323	22.6434	22.7845
	1.77898	-0.310104	O43824	O43824	GTPB6_HUMAN	GTPBP6	Putative GTP-binding protein 6	21.7098	21.8589	21.8066	22.1481	21.9736	22.1838
	0.267429	0.0703576	O43852;O43852-3	O43852-15;O43852-2;O43852-3;O43852-4;O43852-5;O43852-6;O43852-8;O43852-9;H0Y875;O43852	CALU_HUMAN	CALU	Calumenin	24.5013	24.482	24.5939	24.3402	24.3727	24.6532
	0.176695	-0.0565879	O43865	O43865	SAHH2_HUMAN	AHCYL1	S-adenosylhomocysteine hydrolase-like protein 1	21.712	21.7768	21.386	21.667	21.6718	21.7058
	1.17062	0.243238	O43869	A0A126GWK9;O43869	OR2T1_HUMAN	OR2T1	Olfactory receptor 2T1	32.0768	32.0894	31.7971	31.7469	31.7797	31.7069
	0.408966	-0.156593	O43896	O43896	KIF1C_HUMAN	KIF1C	Kinesin-like protein KIF1C	21.2817	21.2137	21.2874	21.7166	21.1654	21.3706
	0.43209	0.294107	O43900	H0Y413;O43900-2;O43900	PRIC3_HUMAN	PRICKLE3	Prickle planar cell polarity protein 3	22.3521	21.9405	21.3661	21.4879	21.6113	21.6772
	0.315709	-0.170325	O43913	O43913-2;O43913	ORC5_HUMAN	ORC5	Origin recognition complex subunit 5	22.4406	22.6432	22.3968	23.0782	22.4686	22.4448
	0.382863	-0.148307	O43929	O43929-2;O43929-3;O43929	ORC4_HUMAN	ORC4	Origin recognition complex subunit 4	21.1919	21.3139	21.074	21.6223	21.123	21.2793
	0.77645	1.79092	O43933	O43933-2;A0A0C4DG33;O43933	PEX1_HUMAN	PEX1	Peroxisomal ATPase PEX1	21.6229	24.0599	20.5932	20.443	20.6833	19.7769
	0.0981526	0.0949167	O60216	A0A804HJ87;A0A140T8W2;A0A8I5KWV3;E5RIN7;Q9H4I0-2;E5RJK5;E5RJW1;E5RFV8;O60216;Q9H4I0	RAD21_HUMAN	RAD21	Double-strand-break repair protein rad21 homolog	21.9562	21.7829	21.2662	21.2204	21.3788	22.1213
	0.835746	-0.227272	O60231	A0A140T947;O60231	DHX16_HUMAN	DHX16	Pre-mRNA-splicing factor ATP-dependent RNA helicase DHX16	22.905	23.0927	23.1062	23.0522	23.321	23.4126
	0.102806	0.0794106	O60245;O60245-2	O60245-2;A0A8V8TM73;A0A8Q3SIA5;A0A8Q3SI47;A0A8Q3SI70;A0A8Q3SI92;A0A087X2C4;O60245	PCDH7_HUMAN	PCDH7	Protocadherin-7	21.8324	21.4938	21.1397	21.0425	21.6962	21.489
	0.410041	0.036087	O60264	B7ZLQ5;A0A0A0MRP6;P28370-2;O60264;P28370	SMCA5_HUMAN	SMARCA5	SWI/SNF-related matrix-associated actin-dependent regulator of chromatin subfamily A member 5	24.7276	24.717	24.709	24.6813	24.618	24.7461
	0.472471	0.192303	O60271;O60271-2;O60271-4;O60271-9	H0YBE9;O60271-2;O60271-3;O60271-4;O60271-5;O60271-9;O60271	JIP4_HUMAN	SPAG9	C-Jun-amino-terminal kinase-interacting protein 4	23.282	23.337	23.7512	23.1759	23.1614	23.456
	0.297414	-0.254889	O60287	O60287	NPA1P_HUMAN	URB1	Nucleolar pre-ribosomal-associated protein 1	20.5001	20.6119	21.1596	20.8316	20.6401	21.5646
	0.386914	0.22582	O60293;O60293-2	O60293-2;O60293	ZC3H1_HUMAN	ZFC3H1	Zinc finger C3H1 domain-containing protein	19.8592	19.9486	19.2712	19.3707	19.3183	19.7126
	0.729217	-0.176289	O60306	O60306	AQR_HUMAN	AQR	RNA helicase aquarius	20.994	21.2763	21.3383	21.4191	21.3156	21.4028
	0.483749	0.433231	O60313-2	E5KLJ9;A0A2R8Y5G3;A0A2R8Y5E2;A0A2R8YE54;A0A2R8YE78;A0A2R8YDM2;A0A2R8YD53;A0A2R8YGE5;O60313-10;O60313-11;O60313-13;C9JMB8;O60313-2;O60313-9;O60313	OPA1_HUMAN	OPA1	Isoform of O60313, Isoform 2 of Dynamin-like 120 kDa protein, mitochondrial	22.5887	21.8497	21.4868	21.9104	21.5518	21.1632
	0.433005	-0.207864	O60333-3	O60333-3	KIF1B_HUMAN	KIF1B	Isoform of O60333, Isoform 3 of Kinesin-like protein KIF1B	21.3109	21.447	21.3804	21.9684	21.511	21.2823
	0.634256	0.595865	O60333;O60333-2;O60333-4	O60333-2;O60333-4;A0A0U1RQL3;A0A8Q3WM94;A0A8Q3WLB2;A0A8Q3WLB3;A0A087WWA3;Q4R9M9;O60333	KIF1B_HUMAN	KIF1B	Kinesin-like protein KIF1B	28.9046	29.1696	28.6422	27.52	28.6751	28.7336
	0.0959257	0.173883	O60341;O60341-2	A0A8I5QJJ5;A0A8I5QKM3;A0A8I5QJR3;R4GMQ1;O60341-2;A0A8I5KPV0;A0A8I5KRX9;A0A8I5KSH0;A0A8I5KQU6;A0A8I5KRF4;A0A8I5KRB8;A0A8I5KRC9;A0A8I5KTR5;A0A8I5KT29;A0A8I5KVZ4;A0A8I5KV76;A0A8I5KXU4;O60341	KDM1A_HUMAN	KDM1A	Lysine-specific histone demethylase 1A	19.5839	17.4962	17.8282	18.0766	18.1798	18.1303
	0.0385298	-0.0100517	O60343;O60343-2;O60343-3	A0A3B3IRT3;O60343-2;O60343-3;O60343	TBCD4_HUMAN	TBC1D4	TBC1 domain family member 4	21.6298	21.548	21.4077	21.584	21.6126	21.419
	0.355531	-0.0968418	O60353;O60353-2	O60353-2;O60353	FZD6_HUMAN	FZD6	Frizzled-6	22.3735	22.1182	22.2179	22.2089	22.4974	22.2938
	0.733308	0.133445	O60427	A0A0A0MR51;H7C2V0;O60427	FADS1_HUMAN	FADS1	Acyl-CoA (8-3)-desaturase	22.1148	21.9388	22.0786	21.7834	21.9646	21.9838
	0.145061	0.0680065	O60488;O60488-2	A0A804HI36;O60488-2;O60488	ACSL4_HUMAN	ACSL4	Long-chain-fatty-acid--CoA ligase 4	20.8897	21.0485	20.6627	20.9076	20.9556	20.5336
	0.155255	-0.0878347	O60506	F6UXX1;B7Z645;A0A7I2YQN2;A0A7I2V2F2;A0A7I2V309;A0A7I2V4Z0;O60506-2;O60506-3;O60506-4;A0A7I2V5Q6;O60506	HNRPQ_HUMAN	SYNCRIP	Heterogeneous nuclear ribonucleoprotein Q	29.0313	28.8192	28.5584	29.1935	28.8373	28.6416
	0.232758	-0.205538	O60506-4	H0YAA0;B7Z645;A0A7I2YQN2;A0A7I2YQV8;A0A7I2V346;O60506-3;O60506-4;O60506-5	HNRPQ_HUMAN	SYNCRIP	Isoform of O60506, Isoform 4 of Heterogeneous nuclear ribonucleoprotein Q	25.8816	25.1765	25.8389	26.311	25.792	25.4106
	0.487007	0.118987	O60508	Q5SRN1;O60508	PRP17_HUMAN	CDC40	Pre-mRNA-processing factor 17	22.4707	22.748	22.6211	22.6093	22.5056	22.3679
	0.235435	0.0295747	O60524;O60524-3;O60524-4	O60524-2;O60524-3;O60524-4;O60524-5;O60524	NEMF_HUMAN	NEMF	Ribosome quality control complex subunit NEMF	24.1745	24.335	24.2284	24.1966	24.2452	24.2075
	1.34952	0.282269	O60563	C9JUL2;H7BZ27;O60583-2;O60583;O60563	CCNT1_HUMAN	CCNT1	Cyclin-T1	24.6978	24.7139	24.4344	24.2723	24.3994	24.3277
	0.0782969	0.0629838	O60573	O60573-2;B4E1E4;C9JEL3;B9A044;B9A023;B8ZZL3;B8ZZ50;A0A8I5KSA5;A0A8I5KT16;O60573	IF4E2_HUMAN	EIF4E2	Eukaryotic translation initiation factor 4E type 2	24.5538	24.3901	24.2634	24.8504	24.2388	23.9291
	0.0843136	-0.0647195	O60583;O60583-2	O60583-2;O60583	CCNT2_HUMAN	CCNT2	Cyclin-T2	19.9538	20.7864	20.7017	20.4688	20.4975	20.6696
	0.305979	-0.0833645	O60610;O60610-2;O60610-3	A0A2R8Y5N1;O60610-2;O60610-3;O60610	DIAP1_HUMAN	DIAPH1	Protein diaphanous homolog 1	21.9485	21.942	21.6177	21.9563	21.8881	21.914
	0.356101	-0.0896524	O60645	D6RB59;H0Y995;O60645	EXOC3_HUMAN	EXOC3	Exocyst complex component 3	24.1555	24.1969	24.0022	24.3246	24.0391	24.2599
	0.432285	0.162064	O60678	O60678-2;O60678	ANM3_HUMAN	PRMT3	Protein arginine N-methyltransferase 3	23.2872	23.4312	23.0115	23.2751	23.0439	22.9247
	1.93801	-0.745022	O60684	Q5TFJ7;O60684	IMA7_HUMAN	KPNA6	Importin subunit alpha-7	21.1829	21.2651	21.7176	22.0857	22.1843	22.1307
	0.55814	0.146864	O60716-3;O60716-5	O60716-2;O60716-6;O60716-7;O60716-8;O60716-9;O60716-3;O60716-4;O60716-5;C9JZR2;H0YC95;A0A669KB62;A0A669KB05;O60716-10;O60716-11;O60716-12;O60716-13;O60716-14;O60716-15;O60716-16;O60716-17;O60716-18;O60716-19;O60716-20;O60716-21;O60716-22;O60716-23;O60716-24;O60716	CTND1_HUMAN	CTNND1	Isoform of O60716, Isoform 1AC of Catenin delta-1	22.6176	22.8328	22.4388	22.4573	22.5334	22.4578
	0.0698005	-0.0388133	O60762	H0Y368;A0A804HIB3;A0A804HIK9;Q5QPJ9;Q5QPK2;O60762	DPM1_HUMAN	DPM1	Dolichol-phosphate mannosyltransferase subunit 1	24.7907	24.4495	24.4456	24.9015	24.5299	24.3708
	0.0223904	-0.0107021	O60783	O60783	RT14_HUMAN	MRPS14	Small ribosomal subunit protein uS14m	21.8023	22.2714	22.1272	21.9998	21.9978	22.2354
	0.442693	0.211809	O60828;O60828-2;O60828-4;O60828-5	O60828-2;O60828-4;O60828-5;H7C053;O60828	PQBP1_HUMAN	PQBP1	Polyglutamine-binding protein 1	24.1458	24.1152	23.8701	24.102	23.9183	23.4753
	0.762283	-0.147177	O60832	C9IYT0;A0A8V8TKY9;O60832-2;A0A8Q3WLG7;A0A8Q3WLD1;A0A8Q3WLC8;A0A8Q3SJE8;A0A8Q3SIS9;A0A8Q3SIX2;A0A8Q3SIY6;O60832	DKC1_HUMAN	DKC1	H/ACA ribonucleoprotein complex subunit DKC1	26.9956	26.8641	26.7055	27.044	26.9458	27.0169
	1.44928	-0.117625	O60841	A0A087WUT6;O60841	IF2P_HUMAN	EIF5B	Eukaryotic translation initiation factor 5B	27.0151	27.0192	26.9194	27.0668	27.1316	27.1081
	0.874266	0.152722	O60869	O60869-2;O60869-3;O60869	EDF1_HUMAN	EDF1	Endothelial differentiation-related factor 1	25.6705	25.7961	25.5876	25.4394	25.6271	25.5296
	0.934675	-0.607138	O60870;O60870-2	O60870-2;S4R357;O60870	KIN17_HUMAN	KIN	DNA/RNA-binding protein KIN17	18.5998	19.3362	19.5075	19.8852	19.867	19.5126
	0.158989	0.0925579	O60884	O60884	DNJA2_HUMAN	DNAJA2	DnaJ homolog subfamily A member 2	24.4531	24.5208	23.9969	24.509	24.1542	24.0298
	0.249915	-0.0358117	O60885	O60885-2;O60885-3;O60885	BRD4_HUMAN	BRD4	Bromodomain-containing protein 4	22.6078	22.5902	22.5207	22.5143	22.6264	22.6854
	0.382385	-0.175658	O60942	O60942-2;O60942-3;O60942-4;O60942	MCE1_HUMAN	RNGTT	mRNA-capping enzyme	21.4029	21.7669	21.9506	21.7003	22.0701	21.877
	0.222663	0.238054	O75027;O75027-2	A0A2R8Y473;O75027-2;O75027-3;B4DGL8;A0A590UJS8;A0A5F9ZA98;A0A087WW65;O75027	ABCB7_HUMAN	ABCB7	Iron-sulfur clusters transporter ABCB7, mitochondrial	22.0685	21.2163	20.6627	21.2443	20.9822	21.0068
	0.0459879	0.00603676	O75044	A0A075B7B5;B7ZM87;Q7Z6B7-2;G5EA48;Q5VZB4;O75044;Q7Z6B7	SRGP2_HUMAN	SRGAP2	SLIT-ROBO Rho GTPase-activating protein 2	21.7847	21.6654	21.6952	21.6551	21.7336	21.7386
	0.149651	-0.0727889	O75054;O75054-2	O75054-2;O75054	IGSF3_HUMAN	IGSF3	Immunoglobulin superfamily member 3	26.6522	26.2334	26.4198	26.6255	26.6592	26.2389
	0.311034	-0.222249	O75063	O75063	XYLK_HUMAN	FAM20B	Glycosaminoglycan xylosylkinase	21.349	20.3702	20.8252	20.9277	21.1551	21.1283
	0.0226524	-0.0106754	O75122-3	J3KR49;A0A0U1RQI6;E7EW49;E7ERI8;O75122-2;O75122-3;E3W994;A0A804HJG7;E7ENG2;B3KR06;O75122	CLAP2_HUMAN	CLASP2	Isoform of O75122, Isoform 3 of CLIP-associating protein 2	21.7476	21.6391	21.3967	21.8275	21.4234	21.5646
	0.135213	0.0647354	O75127	C9JQN9;C9JGL8;G3V325;O75127	PTCD1_HUMAN	PTCD1	Pentatricopeptide repeat-containing protein 1, mitochondrial	20.7855	20.4511	20.3329	20.4195	20.2847	20.671
	0.339404	-0.145051	O75128;O75128-2	J3KR05;O75128-2;O75128-6;O75128	COBL_HUMAN	COBL	Protein cordon-bleu	19.9854	20.1337	20.1925	20.5794	20.101	20.0663
	0.571371	-0.0769774	O75147;O75147-1;O75147-2;O75147-4	A8MSZ8;A6NN50;O75147-1;O75147-2;O75147-4;O75147	OBSL1_HUMAN	OBSL1	Obscurin-like protein 1	22.0861	22.0719	22.111	22.2215	22.2294	22.0491
	0.0861398	-0.0621878	O75150;O75150-3	H3BP71;O75150-3;O75150-4;O75150;Q5VTR2	BRE1B_HUMAN	RNF40	E3 ubiquitin-protein ligase BRE1B	21.2004	21.1708	20.4216	20.9425	21.0121	21.0247
	0.734571	0.164637	O75151	E7ET14;A0A087WW48;O75151	PHF2_HUMAN	PHF2	Lysine-specific demethylase PHF2	21.9523	22.2043	21.9598	21.9954	21.8051	21.822
	0.0696174	-0.0417042	O75153	K7EIG1;A0A494C0R8;I3L318;I3L2B0;O75153	CLU_HUMAN	CLUH	Clustered mitochondria protein homolog	22.1863	22.3001	22.3481	22.7175	22.1992	22.0428
	0.451227	0.0711803	O75165	A0A3B3IRM0;O75165	DJC13_HUMAN	DNAJC13	DnaJ homolog subfamily C member 13	21.5418	21.6568	21.6518	21.4329	21.6108	21.5931
	0.457855	0.291008	O75175	H0Y5X7;A0A0G2JPP0;A0A0G2JN65;H7C5J4;O75175	CNOT3_HUMAN	CNOT3	CCR4-NOT transcription complex subunit 3	22.1846	22.1893	22.1949	22.2917	22.0333	21.3708
	0.118158	0.0345052	O75179;O75179-2	O75179-2;O75179-6;O75179-7;H0YLQ3;H0YM23;H3BLS9;H0Y4P6;H7C2F5;Q8IWZ3-4;Q8IWZ3-6;E9PDP5;O75179;Q8IWZ3	ANR17_HUMAN	ANKRD17	Ankyrin repeat domain-containing protein 17	25.0671	25.2193	25.1449	24.9182	25.1776	25.232
	0.803295	0.156548	O75190	C9J2C4;C9JXB9;C9JRD2;A0A0J9YX62;O75190-2;O75190-3;O75190-4;P25686-2;Q8NHS0;P25686;O75190	DNJB6_HUMAN	DNAJB6	DnaJ homolog subfamily B member 6	23.0488	23.165	23.0722	23.0298	23.0131	22.7734
	0.672737	-0.217203	O75319	O75319-2;A0A8Q3SIC9;A0A8Q3SIF8;A0A8Q3SIE6;A0A8Q3SIB0;A0A8Q3SI85;O75319	DUS11_HUMAN	DUSP11	RNA/RNP complex-1-interacting phosphatase	20.8659	20.9744	21.0538	20.9147	21.2709	21.3601
	0.00830387	0.00546583	O75323	H7C333;O75323	NIPS2_HUMAN	NIPSNAP2	Protein NipSnap homolog 2	20.0884	20.7134	20.5371	20.6356	20.4343	20.2527
	0.886268	-0.345615	O75330;O75330-2;O75330-3;O75330-4	O75330-2;O75330-3;O75330-4;E5RIH2;E5RI30;O75330	HMMR_HUMAN	HMMR	Hyaluronan mediated motility receptor	20.6421	20.9612	21.1392	21.0935	21.4649	21.2209
	0.0845627	-0.0531	O75352;O75352-2	J3KSI4;J3KT75;J3KTK8;O75352-2;I3L4E0;I3L405;I3L295;I3L261;I3L1D2;J3QQZ4;J3QRD5;J3QS48;J3QW43;O75352	MPU1_HUMAN	MPDU1	Mannose-P-dolichol utilization defect 1 protein	22.2708	22.0113	21.8305	22.4204	21.7918	22.0596
	0.832061	0.0581601	O75367-1;O75367-3	O75367-1;O75367-3;B4DJC3;O75367	H2AY_HUMAN	MACROH2A1	Isoform of O75367, Isoform 2 of Core histone macro-H2A.1	29.468	29.4118	29.4387	29.3325	29.4296	29.3819
	0.270741	-0.268668	O75376	J3KS51;O75376-2;J3KT44;E7EVU5;E7EW50;H0Y459;C9JAP0;A0A994J5B8;O75376	NCOR1_HUMAN	NCOR1	Nuclear receptor corepressor 1	15.6683	15.7351	15.7907	15.4388	15.7971	16.7643
	0.944435	-0.254943	O75382;O75382-2	O75382-2;O75382-3;O75382-4;O75382	TRIM3_HUMAN	TRIM3	Tripartite motif-containing protein 3	20.9058	20.4935	20.6332	20.947	20.8643	20.986
	0.191999	0.145398	O75394	O75394	RM33_HUMAN	MRPL33	Large ribosomal subunit protein bL33m	24.1073	23.7941	23.9545	23.5466	24.3578	23.5153
	0.160391	0.0747026	O75396	O75396	SC22B_HUMAN	SEC22B	Vesicle-trafficking protein SEC22b	23.3178	23.2834	22.8475	22.9551	23.0241	23.2454
	0.627222	0.157801	O75400	A0A7N4I394;O75400-2;O75400-3;A0A8V8TM61;A0A8V8TM87;A0A8Q3SIG7;F5H578;O75400	PR40A_HUMAN	PRPF40A	Pre-mRNA-processing factor 40 homolog A	26.2026	26.0183	25.956	26.0726	25.8127	25.8183
	0.480139	0.378867	O75419;O75419-2;O75419-3	O75419-2;O75419-3;A0A5F9ZH29;A0A5K1VW85;O75419	CDC45_HUMAN	CDC45	Cell division control protein 45 homolog	21.6858	21.4088	21.4176	21.5424	21.3605	20.4726
	0.474169	0.224162	O75420	O75420	GGYF1_HUMAN	GIGYF1	GRB10-interacting GYF protein 1	20.8596	20.4929	20.5322	20.0812	20.6512	20.4798
	0.251236	0.101172	O75436	S4R3Q6;O75436-2;Q4G0F5;O75436	VP26A_HUMAN	VPS26A	Vacuolar protein sorting-associated protein 26A	20.5102	20.8208	20.6826	20.6872	20.7163	20.3066
	0.85253	-0.477448	O75446	O75446	SAP30_HUMAN	SAP30	Histone deacetylase complex subunit SAP30	19.5156	19.0552	19.1013	19.2969	19.7772	20.0304
	0.454663	-0.23258	O75449	B7ZBC8;B7ZBC9;O75449	KTNA1_HUMAN	KATNA1	Katanin p60 ATPase-containing subunit A1	20.1668	20.6215	20.6085	20.383	20.9216	20.79
	0.261691	-0.135853	O75462	A0A804HI12;M0QZL6;O75462	CRLF1_HUMAN	CRLF1	Cytokine receptor-like factor 1	20.8117	20.6241	20.4442	20.6935	20.4952	21.099
	0.260608	0.0857983	O75475	O75475	PSIP1_HUMAN	PSIP1	PC4 and SFRS1-interacting protein	25.1025	25.4302	25.0566	25.1498	25.1857	24.9965
	0.899751	-0.327301	O75477	O75477	ERLN1_HUMAN	ERLIN1	Erlin-1	22.6454	22.7877	22.3306	23.1188	22.7891	22.8378
	0.267705	0.106928	O75494-3;O75494-6	Q5JRI1;R4GMP8;O75494-2;O75494-3;O75494-4;O75494-5;O75494-6;Q6IQ42;O75494	SRS10_HUMAN	SRSF10	Isoform of O75494, Isoform 3 of Serine/arginine-rich splicing factor 10	26.8152	26.4802	26.314	26.4654	26.3097	26.5135
	0.378036	0.382079	O75496	E2QRF9;O75496	GEMI_HUMAN	GMNN	Geminin	23.3826	22.6587	22.204	22.6855	21.8746	22.539
	1.92683	-0.372595	O75530;O75530-2;O75530-3	A0A5F9ZI63;O75530-2;O75530-3;O75530	EED_HUMAN	EED	Polycomb protein EED	22.5653	22.662	22.8538	23.058	23.0772	23.0637
	1.01275	1.03455	O75531	O75531	BAF_HUMAN	BANF1	Barrier-to-autointegration factor	30.5753	29.723	29.1362	28.9438	29.0742	28.3127
	1.6016	0.228636	O75533	O75533	SF3B1_HUMAN	SF3B1	Splicing factor 3B subunit 1	25.5508	25.5628	25.5602	25.2524	25.4592	25.2763
	0.137139	0.082379	O75534;O75534-2	A0A8I5QJA6;A0A8I5QKX0;E9PLD4;A0A8I5KNL1;O75534-2;O75534-3;O75534-4;A0A8I5KPQ8;A0A8I5KPJ6;A0A8I5KPC0;A0A8I5KS07;A0A8I5KTQ3;A0A8I5KW72;A0A8I5KV85;A0A8I5KW29;A0A8I5KYL4;A0A8I5KYL8;A0A8I5KWW0;A0A8I5KXL1;A0A8I5KXH5;O75534	CSDE1_HUMAN	CSDE1	Cold shock domain-containing protein E1	24.2503	24.4263	23.9942	23.8004	24.1963	24.427
	0.369154	0.582097	O75554;O75554-2	O75554-2;O75554	WBP4_HUMAN	WBP4	WW domain-binding protein 4	22.4635	22.2016	21.6108	22.5052	21.622	20.4025
	1.73042	-0.206549	O75569	O75569-2;O75569-3;F8WEG8;C9JMM3;G5E9Q4;A0A7I2YQ87;A0A7I2V2P4;A0A7I2V315;A0A7I2V3L6;A0A7I2V593;A0A7I2V5H3;A0A7I2V5C2;O75569	PRKRA_HUMAN	PRKRA	Interferon-inducible double-stranded RNA-dependent protein kinase activator A	25.8232	25.7135	25.7417	25.9595	26.043	25.8955
	0.728992	-0.219542	O75607	O75607	NPM3_HUMAN	NPM3	Nucleoplasmin-3	27.0296	26.9561	27.073	26.9865	27.2897	27.4411
	0.112614	-0.042469	O75616	O75616-2;J3QRV9;J3QSB2;O75616	ERAL1_HUMAN	ERAL1	GTPase Era, mitochondrial	21.4915	21.3854	21.4374	21.6749	21.2255	21.5413
	0.251227	-0.23704	O75638-2	O75638-2;O75638	CTAG2_HUMAN	CTAG2	Isoform of O75638, Isoform LAGE-1A of Cancer/testis antigen 2	22.3241	22.5751	22.9539	23.5027	22.5973	22.4642
	0.0986609	0.0118853	O75643	A0A494C1A5;O75643	U520_HUMAN	SNRNP200	U5 small nuclear ribonucleoprotein 200 kDa helicase	26.2292	26.0986	26.1945	26.1793	26.182	26.1253
	0.599032	0.614651	O75676;O75676-2	A0A0A6YYC0;E9PJN1;O75676-2;O75676	KS6A4_HUMAN	RPS6KA4	Ribosomal protein S6 kinase alpha-4	19.6798	19.5958	20.1434	19.753	19.4671	18.3548
	0.648182	0.213378	O75683	O75683	SURF6_HUMAN	SURF6	Surfeit locus protein 6	24.6542	24.4575	24.2591	24.0586	24.2945	24.3775
	0.0458444	0.00993601	O75691	O75691	UTP20_HUMAN	UTP20	Small subunit processome component 20 homolog	23.147	23.0833	22.9471	23.1386	23.0122	22.9969
	0.453871	-0.205982	O75694;O75694-2	O75694-2;E9PF10;O75694	NU155_HUMAN	NUP155	Nuclear pore complex protein Nup155	20.0276	20.5661	20.3822	20.3011	20.6554	20.6374
	0.181934	-0.0635738	O75695	O75695	XRP2_HUMAN	RP2	Protein XRP2	21.8881	21.8961	21.7727	21.9342	22.126	21.6874
	1.34237	0.378685	O75718	C9JP16;O75718	CRTAP_HUMAN	CRTAP	Cartilage-associated protein	22.2689	22.2602	22.0087	21.9172	21.6002	21.8843
	0.27786	0.101293	O75781	O75781-2;O75781	PALM_HUMAN	PALM	Paralemmin-1	23.4808	23.7532	23.6539	23.5408	23.7344	23.3088
	0.851646	-0.21746	O75794	H7BZW7;X6RA30;X6RF82;O75794	CD123_HUMAN	CDC123	Cell division cycle protein 123 homolog	22.5595	22.7427	22.6761	23.0114	22.9513	22.6681
	0.743423	0.407551	O75817	C9JYM0;O75817	POP7_HUMAN	POP7	Ribonuclease P protein subunit p20	25.9315	26.1397	26.1956	25.9768	25.8578	25.2096
	0.700928	0.164667	O75818;O75818-2	O75818-2;X6RLL4;A0A087X1N3;O75818	RPP40_HUMAN	RPP40	Ribonuclease P protein subunit p40	22.6321	22.5193	22.3227	22.4414	22.2754	22.2632
	0.362314	0.0641263	O75821	K7EL20;K7ENA8;K7EP16;K7ER90;O75821	EIF3G_HUMAN	EIF3G	Eukaryotic translation initiation factor 3 subunit G	28.8967	28.9567	29.0528	28.9309	28.9897	28.7933
	0.863338	0.326715	O75822	O75822-2;O75822	EIF3J_HUMAN	EIF3J	Eukaryotic translation initiation factor 3 subunit J	27.253	27.2617	27.3749	26.6428	27.2232	27.0435
	0.393427	0.451004	O75874	O75874	IDHC_HUMAN	IDH1	Isocitrate dehydrogenase [NADP] cytoplasmic	25.2753	24.5068	23.7756	24.4983	23.894	23.8124
	0.75389	-0.47519	O75880	J3QL56;O75880	SCO1_HUMAN	SCO1	Protein SCO1 homolog, mitochondrial	23.6907	23.7227	24.215	24.8181	24.0742	24.1618
	0.679071	0.250355	O75909	O75909-1;O75909-2;O75909-4;G3V5E1;G3V2Q3;G3V235;O75909	CCNK_HUMAN	CCNK	Cyclin-K	24.7238	24.3544	24.3111	24.4102	24.1733	24.0548
	0.000309334	-0.000301997	O75915	O75915	PRAF3_HUMAN	ARL6IP5	PRA1 family protein 3	25.6687	25.1419	24.761	25.4987	24.8796	25.1942
	1.11074	-0.33683	O75925	H3BSI8;O75925-2;O75925-3;O75925	PIAS1_HUMAN	PIAS1	E3 SUMO-protein ligase PIAS1	21.2568	21.3801	21.6852	21.8474	21.6493	21.8359
	0.132533	-0.0485096	O75934	O75934	SPF27_HUMAN	BCAS2	Pre-mRNA-splicing factor SPF27	24.6085	24.6431	24.693	24.4405	24.7663	24.8833
	0.390335	0.0647926	O75940	O75940	SPF30_HUMAN	SMNDC1	Survival of motor neuron-related-splicing factor 30	21.0998	21.0377	21.0392	20.9448	20.911	21.1266
	0.129693	-0.512763	O75947	O75947	ATP5H_HUMAN	ATP5PD	ATP synthase subunit d, mitochondrial	24.4917	22.3665	22.8889	26.1672	23.431	21.6871
	0.217523	-0.0535762	O75955	O75955-2;A0A140T9W4;A0A140T9R1;A0A140T974;O75955	FLOT1_HUMAN	FLOT1	Flotillin-1	24.2655	24.4969	24.4994	24.5817	24.4493	24.3915
	0.824042	-0.417918	O75962;O75962-5	O75962-2;O75962-4;O75962-5;E7EWP2;E7EPJ7;A0A8V8TLX5;A0A994J7G8;F5H228;O75962	TRIO_HUMAN	TRIO	Triple functional domain protein	20.262	19.8077	19.7378	20.5561	20.0204	20.4848
	0.161702	0.147033	O75964	A0A8I5KSW3;A0A8I5KT86;A0A8I5KSQ4;A0A3B3ITX4;O75964	ATP5L_HUMAN	ATP5MG	ATP synthase subunit g, mitochondrial	24.009	23.525	23.4249	23.7594	23.8313	22.927
	0.476066	0.0489845	O76021	I3L3U9;I3L3C4;I3L234;J3QSV6;O76021	RL1D1_HUMAN	RSL1D1	Ribosomal L1 domain-containing protein 1	27.003	27.0067	26.9358	26.8564	26.9699	26.9722
	0.0947761	0.10938	O76031	O76031	CLPX_HUMAN	CLPX	ATP-dependent Clp protease ATP-binding subunit clpX-like, mitochondrial	20.6094	20.3537	20.3998	21.1159	20.1737	19.7453
	0.424528	0.0903416	O76041	O76041	NEBL_HUMAN	NEBL	Nebulette	25.6817	25.4218	25.4034	25.4359	25.3896	25.4104
	1.40944	-0.554185	O76071	O76071	CIAO1_HUMAN	CIAO1	Probable cytosolic iron-sulfur protein assembly protein CIAO1	21.2221	20.9239	21.29	21.6439	21.4816	21.9731
	0.213153	0.0306257	O76094	O76094-2;R4GNC1;O76094	SRP72_HUMAN	SRP72	Signal recognition particle subunit SRP72	32.5664	32.5828	32.6856	32.5302	32.5496	32.6632
	0.343424	0.0887483	O94761	V9GZ64;A0A087X072;O94761	RECQ4_HUMAN	RECQL4	ATP-dependent DNA helicase Q4	21.968	22.3084	22.1527	21.9703	22.0994	22.0932
	0.0380539	0.0224101	O94762;O94762-4	J3KTQ2;O94762-2;O94762-3;O94762-4;O94762	RECQ5_HUMAN	RECQL5	ATP-dependent DNA helicase Q5	27.5108	27.6073	27.7414	27.9493	27.3052	27.5377
	0.530269	0.137489	O94763;O94763-3	O94763-2;O94763-3;O94763-4;O94763	RMP_HUMAN	URI1	Unconventional prefoldin RPB5 interactor 1	22.2988	22.1469	21.9607	22.1157	21.9448	21.9334
	0.642422	-0.180127	O94776	O94776-2;O94776	MTA2_HUMAN	MTA2	Metastasis-associated protein MTA2	24.9556	24.8444	24.7969	25.2662	24.865	25.0062
	0.688162	0.375956	O94806	Q9BZL6-2;Q9BZL6-3;O94806;Q9BZL6	KPCD3_HUMAN	PRKD3	Serine/threonine-protein kinase D3	21.0945	21.7571	21.237	21.2772	20.8178	20.8657
	0.514933	0.302699	O94822;O94822-3	O94822-3;O94822	LTN1_HUMAN	LTN1	E3 ubiquitin-protein ligase listerin	22.4103	21.9832	21.8964	22.0444	21.9457	21.3917
	0.44516	0.195512	O94842;O94842-2;O94842-3	O94842-2;O94842-3;O94842	TOX4_HUMAN	TOX4	TOX high mobility group box family member 4	22.0749	21.6716	21.7438	21.3595	21.7102	21.8342
	1.01307	0.529265	O94851;O94851-1;O94851-3;O94851-4;O94851-5;O94851-6	O94851-1;O94851-2;O94851-3;O94851-4;O94851-5;O94851-6;O94851	MICA2_HUMAN	MICAL2	[F-actin]-monooxygenase MICAL2	19.7075	19.9453	19.5785	18.835	19.5985	19.2101
	0.380839	0.106734	O94874	O94874-2;O94874-3;O94874	UFL1_HUMAN	UFL1	E3 UFM1-protein ligase 1	21.8113	21.7279	21.61	21.7913	21.4373	21.6005
	0.722158	-0.503861	O94875;O94875-11;O94875-9	O94875-10;O94875-11;O94875-12;O94875-2;O94875-3;O94875-4;O94875-5;O94875-7;O94875-8;O94875-9;H7BXR3;H7C1R7;A0A8V8TNC1;A0A8V8TMC7;A0A8V8TMD6;A0A8Q3WLU7;A0A8Q3WKF2;A0A8Q3WKH1;A0A8Q3WKK4;O94875	SRBS2_HUMAN	SORBS2	Sorbin and SH3 domain-containing protein 2	21.3797	21.202	21.4884	22.2007	22.1354	21.2455
	1.79774	-0.0743179	O94880	B4DG57;O94880-1;O94880-2;O94880	PHF14_HUMAN	PHF14	PHD finger protein 14	24.3434	24.3409	24.3465	24.452	24.3888	24.413
	0.195918	-0.0558262	O94887;O94887-2;O94887-3	O94887-2;O94887-3;O94887	FARP2_HUMAN	FARP2	FERM, ARHGEF and pleckstrin domain-containing protein 2	21.4366	21.5335	21.8022	21.655	21.648	21.6367
	0.103528	0.102561	O94901;O94901-5;O94901-6;O94901-9	H0Y742;H0Y6N5;H7C2K3;E9PHI4;O94901-5;O94901-6;O94901-9;A0A8I5G938;O94901	SUN1_HUMAN	SUN1	SUN domain-containing protein 1	19.9012	19.9828	19.3026	20.1952	19.3687	19.315
	2.36463	0.329397	O94905	E5RHW4;E5RJ09;O94905	ERLN2_HUMAN	ERLIN2	Erlin-2	23.1993	23.1353	23.0971	22.8925	22.8241	22.727
	0.303109	0.0456289	O94906	O94906-2;O94906	PRP6_HUMAN	PRPF6	Pre-mRNA-processing factor 6	24.6938	24.7897	24.8997	24.7206	24.7688	24.757
	0.854188	0.308732	O94913	E9PQ01;E9PKN0;A0A8I5KX04;O94913	PCF11_HUMAN	PCF11	Pre-mRNA cleavage complex 2 protein Pcf11	24.2361	23.9687	23.6606	23.6856	23.6505	23.6032
	0.828197	-0.319586	O94915	A0A286YEZ9;H0Y9X0;F2Z2S2;A0A2C9F2R7;O94915	FRYL_HUMAN	FRYL	Protein furry homolog-like	20.9078	20.816	21.1103	20.962	21.3465	21.4844
	0.103878	-0.0818831	O94919	O94919	ENDD1_HUMAN	ENDOD1	Endonuclease domain-containing 1 protein	23.3738	22.954	22.585	23.3908	22.8711	22.8965
	1.03087	0.156933	O94964-2	O94964-2;O94964-3;H0YDM2;O94964	SOGA1_HUMAN	SOGA1	Isoform of O94964, Isoform 2 of Protein SOGA1	22.8725	22.8919	22.7079	22.6965	22.5856	22.7194
	0.538322	0.343242	O94966-4;O94966-6	E7ESU0;O94966-4;O94966-6;A0A0A0MR08;A0A8I5KV50;A0A8I5KXK1	UBP19_HUMAN	USP19	Isoform of O94966, Isoform 4 of Ubiquitin carboxyl-terminal hydrolase 19	24.7873	24.7068	24.5481	23.7926	24.6148	24.6051
	0.00068991	0.000842412	O94979;O94979-10;O94979-2;O94979-3;O94979-4;O94979-6;O94979-8;O94979-9	D6REX3;D6RHZ5;H0YAB3;H0Y9K1;H0Y8V7;O94979-2;O94979-3;O94979-4;O94979-5;O94979-6;O94979-7;O94979-8;O94979-9;O94979-10;H7BXG7;O94979	SC31A_HUMAN	SEC31A	Protein transport protein Sec31A	20.6562	20.2632	20.423	21.1699	20.2943	19.8756
	1.00728	0.28472	O94992	O94992	HEXI1_HUMAN	HEXIM1	Protein HEXIM1	24.5977	24.5575	24.3567	24.0111	24.2633	24.3834
	0.0666232	0.0229708	O95049;O95049-3;O95049-4	O95049-3;O95049-4;O95049-5;O95049	ZO3_HUMAN	TJP3	Tight junction protein ZO-3	21.1529	20.9508	20.7593	21.0009	20.928	20.8652
	1.15993	-0.20236	O95059	O95059	RPP14_HUMAN	RPP14	Ribonuclease P protein subunit p14	22.47	22.4386	22.4414	22.5057	22.7869	22.6645
	0.756765	-0.153026	O95071;O95071-2	O95071-2;E7EMW7;O95071	UBR5_HUMAN	UBR5	E3 ubiquitin-protein ligase UBR5	21.707	21.7415	21.4941	21.7119	21.8904	21.7993
	0.146804	-0.0601972	O95084	E9PRR2;O95084-2;O95084	PRS23_HUMAN	PRSS23	Serine protease 23	23.3566	23.3918	23.4101	23.143	23.6015	23.5946
	0.50308	0.135922	O95104	O95104-2;O95104-3;O95104	SCAF4_HUMAN	SCAF4	SR-related and CTD-associated factor 4	23.9433	23.7296	23.5718	23.5512	23.7084	23.5773
	0.333687	-0.186613	O95139	O95139	NDUB6_HUMAN	NDUFB6	NADH dehydrogenase [ubiquinone] 1 beta subcomplex subunit 6	22.4163	22.3412	22.1801	22.9363	22.3214	22.2397
	0.0353539	0.00684611	O95163	A0A6Q8PFH9;A0A6Q8PFB7;A0A6Q8PG86;A0A6Q8PFN8;A0A6Q8PHA0;A0A6Q8PGW3;A0A6Q8PH48;A0A6Q8PEX6;A0A6Q8PF66;A0A6Q8PHC9;A0A6Q8PHF4;A0A6Q8PHI5;F5H2T0;O95163	ELP1_HUMAN	ELP1	Elongator complex protein 1	22.1925	22.3837	22.371	22.2891	22.3528	22.2847
	0.316257	0.275468	O95168;O95168-2	O95168-2;O95168	NDUB4_HUMAN	NDUFB4	NADH dehydrogenase [ubiquinone] 1 beta subcomplex subunit 4	21.1911	20.9826	20.939	21.4376	20.28	20.5688
	0.188446	0.122306	O95202	O95202	LETM1_HUMAN	LETM1	Mitochondrial proton/calcium exchanger protein	23.1236	22.8588	22.477	22.955	22.7402	22.3973
	0.412856	0.0598571	O95218-2	O95218-2;O95218	ZRAB2_HUMAN	ZRANB2	Isoform of O95218, Isoform 2 of Zinc finger Ran-binding domain-containing protein 2	30.1292	30.3287	30.2839	30.2085	30.1663	30.1874
	0.216757	-0.0452836	O95232	J3KPP4;D6RDI2;C9JL41;H7C5U7;O95232-2;O95232	LC7L3_HUMAN	LUC7L3	Luc7-like protein 3	28.5043	28.3265	28.5	28.5523	28.3765	28.5379
	0.171101	0.142214	O95235	D6RBN1;D6R9E4;O95235	KI20A_HUMAN	KIF20A	Kinesin-like protein KIF20A	21.475	20.7911	20.409	20.6734	20.7702	20.805
	0.330682	0.140347	O95239;O95239-2	O95239-2;O95239;Q2VIQ3	KIF4A_HUMAN	KIF4A	Chromosome-associated kinesin KIF4A	22.8804	22.9816	22.5931	22.4273	22.7411	22.8658
	1.70799	0.321235	O95243-2	O95243-2;O95243-3;O95243-5;O95243-6;O95243	MBD4_HUMAN	MBD4	Isoform of O95243, Isoform 2 of Methyl-CpG-binding domain protein 4	22.1308	22.1273	21.8792	21.7453	21.7392	21.689
	0.752441	0.384408	O95248;O95248-4;O95248-5	A0A8J8YTQ8;A0A8I5KRX8;A0A8I5KR05;A0A8I5KU87;A0A8I5KUE4;A0A8I5KT60;A0A8I5KTN1;A0A8I5KTI7;A0A8I5KVF2;A0A8I5KYG9;A0A8I5KXX8;A0A8I5KY61;A0A8I5KXN1;O95248-4;O95248-5;O95248	MTMR5_HUMAN	SBF1	Myotubularin-related protein 5	20.6459	20.6481	20.7943	20.425	20.6403	19.8698
	0.409244	-0.185384	O95249	K7EJC8;B4DQA8;G5E9T8;E9PCW1;O95249-2;O95249	GOSR1_HUMAN	GOSR1	Golgi SNAP receptor complex member 1	21.9681	22.0271	21.8106	22.3665	21.7672	22.2281
	0.103999	-0.0399818	O95251	E7EUP3;O95251-2;O95251-3;O95251-4;O95251-5;O95251	KAT7_HUMAN	KAT7	Histone acetyltransferase KAT7	25.1313	25.0235	25.0074	25.3586	24.9824	24.9411
	0.383709	-0.191273	O95292	O95292-2;E5RK64;O95292	VAPB_HUMAN	VAPB	Vesicle-associated membrane protein-associated protein B/C	23.3759	23.4855	23.5904	24.0745	23.5046	23.4464
	0.0920412	0.0858847	O95295	O95295	SNAPN_HUMAN	SNAPIN	SNARE-associated protein Snapin	18.6188	19.6989	18.9628	18.9051	19.1991	18.9186
	0.0664047	0.0435931	O95340;O95340-2	O95340-2;O95340	PAPS2_HUMAN	PAPSS2	Bifunctional 3'-phosphoadenosine 5'-phosphosulfate synthase 2	21.4837	20.9511	21.1861	20.8721	21.4582	21.1598
	0.0165679	0.00412242	O95347	O95347-2;O95347	SMC2_HUMAN	SMC2	Structural maintenance of chromosomes protein 2	23.7172	23.8696	23.5958	23.7495	23.7436	23.6771
	0.333063	0.105267	O95359-3	E9PBC6;O95359-3;E7EMZ9;O95359	TACC2_HUMAN	TACC2	Isoform of O95359, Isoform 3 of Transforming acidic coiled-coil-containing protein 2	22.2938	22.351	22.233	22.407	22.1837	21.9714
	0.445386	-0.219517	O95365	O95365	ZBT7A_HUMAN	ZBTB7A	Zinc finger and BTB domain-containing protein 7A	21.7918	22.0218	21.8664	22.5006	22.0088	21.8292
	0.399279	-0.230642	O95373	O95373	IPO7_HUMAN	IPO7	Importin-7	24.5686	24.3667	24.2812	24.4888	25.0855	24.3341
	0.545301	0.130466	O95391	O95391	SLU7_HUMAN	SLU7	Pre-mRNA-splicing factor SLU7	23.7292	23.5326	23.3916	23.4968	23.3611	23.4042
	1.06742	-0.286266	O95400	O95400	CD2B2_HUMAN	CD2BP2	CD2 antigen cytoplasmic tail-binding protein 2	23.5651	23.713	23.7254	24.182	23.8678	23.8125
	0.12743	0.122962	O95409	O95409	ZIC2_HUMAN	ZIC2	Zinc finger protein ZIC 2	22.7375	21.8059	21.6614	22.0607	22.0439	21.7313
	1.70326	0.338105	O95425;O95425-2;O95425-3;O95425-4	O95425-2;O95425-3;O95425-4;A0A6I8PIX7;O95425	SVIL_HUMAN	SVIL	Supervillin	21.3324	21.6129	21.4796	21.1812	21.1705	21.0589
	0.312775	0.250914	O95466;O95466-2;O95466-3	O95466-2;O95466-3;O95466	FMNL1_HUMAN	FMNL1	Formin-like protein 1	23.7517	23.4576	22.8535	23.4008	23.1698	22.7395
	0.0594236	0.0266864	O95470	A0A8V8TN35;O95470	SGPL1_HUMAN	SGPL1	Sphingosine-1-phosphate lyase 1	25.272	24.9857	24.8275	25.0912	25.0828	24.8312
	0.209163	0.0617688	O95478	H0YAI9;A0A0A0MQZ6;O95478	NSA2_HUMAN	NSA2	Ribosome biogenesis protein NSA2 homolog	25.6232	25.6478	25.5905	25.7734	25.5134	25.3894
	0.144691	0.0502561	O95503	B0QXZ6;O95503	CBX6_HUMAN	CBX6	Chromobox protein homolog 6	20.6056	20.7465	20.6878	20.7762	20.7263	20.3868
	0.375005	0.172818	O95573	A0A7P0T8L6;A0A7P0T905;A0A7P0TB52;A0A7P0TBB1;A0A7P0TA76;H7BYZ7;O95573	ACSL3_HUMAN	ACSL3	Fatty acid CoA ligase Acsl3	22.8945	22.5671	22.3137	22.4783	22.5461	22.2325
	0.755686	0.342076	O95602	B9ZVN9;O95602	RPA1_HUMAN	POLR1A	DNA-directed RNA polymerase I subunit RPA1	21.8945	21.3959	21.3564	20.9785	21.3492	21.293
	0.305503	0.269564	O95620;O95620-2	O95620-2;A0A669KBH7;A0A669KAY5;A0A669KB27;A0A669KB18;O95620	DUS4L_HUMAN	DUS4L	tRNA-dihydrouridine(20a/20b) synthase [NAD(P)+]-like	24.2093	24.1538	24.7859	23.5218	24.3604	24.458
	0.789897	0.116429	O95625	C9J2L2;A0A8I5QKX4;A0A8I5KRB5;A0A8I5KU41;A0A994J7A5;O95625	ZBT11_HUMAN	ZBTB11	Zinc finger and BTB domain-containing protein 11	24.5873	24.4417	24.6235	24.359	24.4531	24.4911
	0.17815	-0.0868975	O95639	B7Z7B0;C9JEV9;H7C419;O95639-2;O95639-3;O95639	CPSF4_HUMAN	CPSF4	Cleavage and polyadenylation specificity factor subunit 4	23.2333	22.8342	22.7803	23.2664	22.8762	22.966
	0.45495	0.339863	O95672;O95672-2	O95672-2;O95672	ECEL1_HUMAN	ECEL1	Endothelin-converting enzyme-like 1	24.4064	23.5451	23.3735	23.4795	23.4706	23.3552
	0.164057	0.165963	O95684;O95684-2	O95684-2;O95684-3;A0A994J7Q3;A0A994J7Q7;A0A994J7C9;A0A994J7D3;A0A994J7R7;A0A994J7B9;A0A994J5H0;A0A994J5H4;A0A994J5H8;A0A994J5F6;A0A994J500;A0A994J505;A0A994J518;A0A994J523;A0A994J527;A0A994J4R0;A0A994J4R8;A0A994J4T6;A0A087WV25;O95684	CEP43_HUMAN	CEP43	Centrosomal protein 43	20.6214	21.6194	21.6233	21.1911	21.4007	20.7745
	0.0472789	-0.0438557	O95696;O95696-2	J3KQ61;O95696-2;O95696	BRD1_HUMAN	BRD1	Bromodomain-containing protein 1	21.0084	21.156	20.1637	20.824	20.9442	20.6915
	0.0897311	-0.0537383	O95707	K7EQV2;O95707	RPP29_HUMAN	POP4	Ribonuclease P protein subunit p29	23.576	23.1562	23.0509	23.572	23.2834	23.0889
	0.99869	-0.148771	O95714	A0A0J9YXQ8;O95714	HERC2_HUMAN	HERC2	E3 ubiquitin-protein ligase HERC2	26.6395	26.6235	26.6969	26.6726	26.8425	26.8911
	1.00375	0.268579	O95758;O95758-1;O95758-2;O95758-4;O95758-5;O95758-6	O95758-1;O95758-2;O95758-4;O95758-5;O95758-6;O95758-7;X6R242;O95758	PTBP3_HUMAN	PTBP3	Polypyrimidine tract-binding protein 3	22.7343	22.6116	22.8014	22.2255	22.592	22.5241
	0.120823	-0.0293713	O95782;O95782-2	O95782-2;O95782	AP2A1_HUMAN	AP2A1	AP-2 complex subunit alpha-1	21.8991	21.9432	21.7728	21.8709	22.039	21.7933
	0.0933298	0.0274792	O95793;O95793-2	O95793-2;O95793-3;Q5JW30;O95793	STAU1_HUMAN	STAU1	Double-stranded RNA-binding protein Staufen homolog 1	24.8346	24.9732	24.9117	24.7015	24.8995	25.0361
	1.23315	0.223487	O95816	O95816-2;O95816	BAG2_HUMAN	BAG2	BAG family molecular chaperone regulator 2	24.2231	24.3679	24.2114	24.1544	24.0595	23.9181
	0.925587	0.58941	O95817	C9JFK9;O95817	BAG3_HUMAN	BAG3	BAG family molecular chaperone regulator 3	21.1498	21.0603	20.9265	19.9002	20.8797	20.5884
	0.138441	0.0308011	O95819-6	E7EX83;Q8N4C8-2;Q8N4C8-3;Q8N4C8-4;Q8N4C8-5;A0A0D9SEY1;O95819-2;O95819-3;O95819-4;O95819-5;O95819-6;H7C360;H7C0P6;G5E948;Q9UKE5-6;Q9UKE5-7;Q9UKE5-8;Q9UKE5-2;Q9UKE5-3;Q9UKE5-4;Q9UKE5-5;E7EN19;E7ENQ1;Q8N4C8;O95819;Q9UKE5	M4K4_HUMAN	MAP4K4	Isoform of O95819, Isoform 6 of Mitogen-activated protein kinase kinase kinase kinase 4	23.478	23.4447	23.2577	23.2938	23.4485	23.3459
	1.03824	0.657953	O95831	A0A6Q8PFM5;A0A6Q8PFA7;A0A6Q8PFE1;A0A7I2RLJ8;A0A6Q8PFS4;A0A6Q8PFW2;A0A6Q8PFQ8;A0A6Q8PG15;A0A6Q8PHJ4;A0A6Q8PHJ9;A0A6Q8PHC0;E9PMA0;A0A7I2PK44;O95831-2;O95831-3;O95831-5;O95831	AIFM1_HUMAN	AIFM1	Apoptosis-inducing factor 1, mitochondrial	22.4822	21.8673	21.5147	21.238	21.4792	21.1731
	0.144074	-0.166376	O95870;O95870-2	A0A0G2JJD3;O95870-2;O95870	ABHGA_HUMAN	ABHD16A	Phosphatidylserine lipase ABHD16A	20.4945	20.2507	19.8345	21.0921	20.1866	19.8001
	0.677765	0.69106	O95873	O95873	CF047_HUMAN	C6orf47	Uncharacterized protein C6orf47	21.3759	21.237	22.2418	21.4696	21.0119	20.3001
	1.13523	0.42617	O95900	O95900-2;O95900	TRUB2_HUMAN	TRUB2	Pseudouridylate synthase TRUB2, mitochondrial	20.5107	20.6531	20.2736	20.2239	19.7809	20.1542
	0.288125	-0.0976842	O95905;O95905-3	C9J316;O95905-2;O95905-3;F2Z2R1;O95905	ECD_HUMAN	ECD	Protein ecdysoneless homolog	20.3924	20.8133	20.7598	20.8092	20.6877	20.7616
	0.216232	0.252945	O95926	O95926-2;O95926	SYF2_HUMAN	SYF2	Pre-mRNA-splicing factor SYF2	21.671	20.5802	20.2002	20.7718	20.3862	20.5346
	0.0225088	0.0181262	O95983;O95983-2	O95983-2;O95983	MBD3_HUMAN	MBD3	Methyl-CpG-binding domain protein 3	20.4422	20.0117	20.3924	20.0666	19.999	20.7263
	0.00457111	0.0037632	O95985	O95985-2;O95985-3;H0Y6W0;O95985	TOP3B_HUMAN	TOP3B	DNA topoisomerase 3-beta-1	24.7923	24.262	24.0212	24.6274	24.2997	24.1372
	0.467575	0.228097	O95995	O95995-2;A0A087WZT7;O95995	DRC4_HUMAN	GAS8	Dynein regulatory complex subunit 4	20.6224	21.153	21.0385	20.9532	20.6946	20.4818
	0.578857	0.676777	O95997	Q9NZH5-2;O95997;Q9NZH5	PTTG1_HUMAN	PTTG1	Securin	21.6181	21.6864	21.5937	21.7215	19.963	21.1833
	1.12068	0.277288	O96000	H3BPJ9;O96000	NDUBA_HUMAN	NDUFB10	NADH dehydrogenase [ubiquinone] 1 beta subcomplex subunit 10	21.7036	21.6941	21.451	21.4927	21.2131	21.3112
	0.0190622	-0.0170873	O96009	M0QXC5;O96009	NAPSA_HUMAN	NAPSA	Napsin-A	23.9237	24.0765	23.8925	24.5551	23.7951	23.5937
	0.367956	0.0859712	O96013	O96013-2;O96013-3;O96013-4;O96013	PAK4_HUMAN	PAK4	Serine/threonine-protein kinase PAK 4	21.2118	21.4703	21.1687	21.1462	21.2309	21.2159
	0.995984	-0.130238	O96019	O96019-2;O96019;O94805	ACL6A_HUMAN	ACTL6A	Actin-like protein 6A	23.0213	22.8939	22.8558	23.1094	23.0643	22.988
	0.00626204	-0.000857035	O96028	D6R9V2;A0A7P0P278;O96028-3;O96028-5;O96028-6;O96028-7;A0A7I2YQS5;O96028	NSD2_HUMAN	NSD2	Histone-lysine N-methyltransferase NSD2	23.0348	22.9989	23.1061	22.9945	23.1051	23.0428
	0.0272353	-0.0158062	P00338;P00338-3	P00338-3;P00338-4;P00338	LDHA_HUMAN	LDHA	L-lactate dehydrogenase A chain	23.5785	23.8378	23.426	23.3325	23.7147	23.8426
	0.170822	0.0523307	P00367	A0A804HJZ0;A0A804HJD7;A0A804HKE0;P00367-3;P00367;P49448	DHE3_HUMAN	GLUD1	Glutamate dehydrogenase 1, mitochondrial	24.2035	24.1657	23.8553	24.0798	24.0294	23.9583
	0.566082	0.364936	P00387;P00387-2;P00387-3	P00387-2;P00387-3;A0A8I5QKT9;A0A8J8Z3C6;A0A8J8YWN6;A0A8I5KPU0;A0A8I5KR71;A0A087WZB1;P00387	NB5R3_HUMAN	CYB5R3	NADH-cytochrome b5 reductase 3	21.6935	21.6675	21.2531	21.592	21.1947	20.7326
	0.515026	0.130923	P00450	D6RE86;E9PFZ2;P00450	CERU_HUMAN	CP	Ceruloplasmin	24.1999	24.2677	23.9456	23.9809	24.109	23.9305
	0.873171	0.470983	P00533	Q504U8;C9JYS6;P00533	EGFR_HUMAN	EGFR	Epidermal growth factor receptor	22.4722	22.0359	21.9299	21.3058	21.7945	21.9248
	0.0336517	0.0249634	P00558;P00558-2	P00558-2;P00558	PGK1_HUMAN	PGK1	Phosphoglycerate kinase 1	22.778	22.8838	22.1594	22.7097	22.6702	22.3664
	0.787504	0.591263	P00846	P00846	ATP6_HUMAN	MT-ATP6	ATP synthase subunit a	21.7931	20.6064	21.0746	20.5293	20.6281	20.543
	0.0737589	-0.0370967	P00966	Q5T6L5;Q5T6L6;P00966	ASSY_HUMAN	ASS1	Argininosuccinate synthase	22.664	23.0892	22.9184	23.1096	22.9878	22.6855
	1.09344	1.31729	P01040	P01040	CYTA_HUMAN	CSTA	Cystatin-A	23.6045	22.9816	21.8084	21.6202	21.7523	21.0702
	0.286453	0.193794	P01106-1	P01106-1;A0A0B4J1R1	MYC_HUMAN	MYC	Isoform of P01106, Isoform 1 of Myc proto-oncogene protein	21.4868	22.037	21.6592	21.1597	21.5222	21.9197
	1.35637	0.204527	P01116-2	P01116-2;A0A8I5KQ21;A0A8I5KUB5	RASK_HUMAN	KRAS	Isoform of P01116, Isoform 2B of GTPase KRas	25.6386	25.6338	25.5027	25.4949	25.3489	25.3176
	0.430483	0.533937	P02533	P02533	K1C14_HUMAN	KRT14	Keratin, type I cytoskeletal 14	27.0636	27.214	25.8101	26.4494	26.4521	25.5845
	0.00807607	0.00935682	P02538	P02538;O95678;P48668	K2C6A_HUMAN	KRT6A	Keratin, type II cytoskeletal 6A	25.3235	24.5521	24.1816	24.3206	24.8825	24.8262
	0.19219	0.0985959	P02545	P02545-2;P02545-3;P02545-4;P02545-5;P02545-6;Q5TCI8;A0A6Q8PFJ0;A0A6Q8PHQ9;A0A804HL68;P02545	LMNA_HUMAN	LMNA	Prelamin-A/C	24.7983	24.8218	24.3343	24.7816	24.4726	24.4044
	0.455629	0.333391	P02765	P02765	FETUA_HUMAN	AHSG	Alpha-2-HS-glycoprotein	18.4369	18.7664	18.518	18.8182	18.0884	17.8145
	0.329178	-0.144759	P02768	H0YA55;H7C013;A0A0C4DGB6;P02768	ALBU_HUMAN	ALB	Albumin	30.9464	31.0718	31.3475	31.0298	31.5037	31.2665
	0.943155	-0.682295	P02774;P02774-2;P02774-3	D6RF35;D6RBJ7;P02774-2;P02774-3;P02774	VTDB_HUMAN	GC	Vitamin D-binding protein	19.3871	19.6268	20.2847	20.8607	20.2545	20.2303
	0.0984046	-0.0221831	P02786	G3V0E5;A0A8V8TM41;A0A8V8TM46;A0A8V8TN37;A0A8V8TLM6;A0A8V8TLN0;P02786	TFR1_HUMAN	TFRC	Transferrin receptor protein 1	23.9295	23.8293	23.8984	23.9445	24.0159	23.7633
	0.359117	-0.224412	P04004	P04004	VTNC_HUMAN	VTN	Vitronectin	21.5866	21.6162	22.1218	22.3278	22.0138	21.6562
	0.177068	0.0484441	P04049;P04049-2	A0A8I5QJG5;A0A8I5QKZ6;A0A8I5QKU8;A0A0S2Z4L5;P04049-2;H7C155;A0A8I5KQ33;A0A8I5KS16;A0A8I5KSB0;A0A8I5KSI1;A0A8I5KQV4;A0A8I5KSV6;A0A8I5KT32;A0A8I5KTK4;A0A8I5KTA5;A0A8I5KW44;A0A8I5KYC4;A0A8I5KYP5;P04049	RAF1_HUMAN	RAF1	RAF proto-oncogene serine/threonine-protein kinase	21.2207	21.2083	21.0032	21.1629	21.1804	20.9435
	0.210519	0.100921	P04075	J3KPS3;H3BQN4;H3BPS8;A0A3B3IS80;P04075-2;P05062;P04075;P09972	ALDOA_HUMAN	ALDOA	Fructose-bisphosphate aldolase A	23.4535	23.5614	23	23.097	23.3012	23.3139
	0.243114	0.377115	P04083	Q5T3N1;P04083	ANXA1_HUMAN	ANXA1	Annexin A1	22.5778	21.6241	20.7859	20.7319	21.26	21.8645
	0.615028	0.323402	P04150;P04150-10	D6RDA9;P04150-2;P04150-3;P04150-5;P04150-6;P04150-7;P04150-8;P04150-9;P04150-10;A0A494C0P1;Q3MSN4;P04150	GCR_HUMAN	NR3C1	Glucocorticoid receptor	21.2271	21.0525	20.8536	20.3033	20.9683	20.8913
	0.0365157	0.0371628	P04259	P04259;P02538;P48668	K2C6B_HUMAN	KRT6B	Keratin, type II cytoskeletal 6B	25.2793	24.6555	24.1814	24.692	24.8865	24.4262
	0.48621	0.614025	P04264	P04259;P04264	K2C1_HUMAN	KRT1	Keratin, type II cytoskeletal 1	30.3719	30.8151	29.3263	29.629	30.0847	28.9574
	0.00263251	0.00165494	P04406	P04406-2;E7EUT5;P04406	G3P_HUMAN	GAPDH	Glyceraldehyde-3-phosphate dehydrogenase	25.9588	26.5553	26.0256	26.2348	26.2817	26.0184
	0.205845	0.105672	P04439;P04439-2	Q2L6G2;O78179;S6AU73;A2BF26;Q31611;A0A1W2PP77;A0A1W2PP29;Q5SUL5;Q5SS57;A0A1W2PNZ7;Q5SRN5;Q5SRN7;D0EV57;A0A1W2PSE7;A0A1W2PR11;A0A1W2PQD0;A0A1W2PS56;A0A1W2PRX1;A0A1W2PRZ0;A0A1W2PS24;A0A140T9U0;A0A140T9S9;A0A140T9W2;A0A140T9W3;A0A140T9V0;A0A0G2JNX1;A0A140T9W7;A0A140T9X6;A0A140T9M0;A0A0G2JPQ3;A0A140T9C2;A0A140T9D9;A0A140T9H3;A0A140T9G0;A0A140T9J9;A0A140T9A9;A0A140T9B3;A0A140T9B7;A0A140T930;A0A140T937…	HLAA_HUMAN	HLA-A	HLA class I histocompatibility antigen, A alpha chain	21.2358	21.4647	21.3555	20.9104	21.557	21.2716
	0.0488498	-0.0397053	P04632	A0A075B7C0;K7EIV0;U3KQE2;K7ELJ7;K7EM73;A0A0C4DGQ5;P04632	CPNS1_HUMAN	CAPNS1	Calpain small subunit 1	20.126	20.278	19.9928	20.609	20.217	19.6899
	0.14441	-0.0681292	P04792	A0A6Q8PGK1;P04792	HSPB1_HUMAN	HSPB1	Heat shock protein beta-1	26.7249	26.3976	26.4564	26.8761	26.4992	26.408
	0.412627	0.175137	P04843	B7Z4L4;P04843	RPN1_HUMAN	RPN1	Dolichyl-diphosphooligosaccharide--protein glycosyltransferase subunit 1	23.8053	23.6904	23.4632	23.7766	23.3497	23.3072
	0.185685	0.112543	P04844;P04844-2	P04844-2;Q5JYR4;Q5JYR7;A0A994J5J1;P04844	RPN2_HUMAN	RPN2	Dolichyl-diphosphooligosaccharide--protein glycosyltransferase subunit 2	22.3123	22.304	22.1653	22.5951	21.8626	21.9862
	0.238627	0.131071	P04899-2;P04899-3;P04899-5;P04899-6	P04899-2;P04899-5;P04899-6;P04899-3;P04899-4;P04899	GNAI2_HUMAN	GNAI2	Isoform of P04899, Isoform 2 of Guanine nucleotide-binding protein G(i) subunit alpha-2	24.2841	24.4323	24.7845	24.1066	24.6508	24.3504
	0.366397	0.145504	P05023;P05023-4	P05023-2;P05023-3;P05023-4;P05023	AT1A1_HUMAN	ATP1A1	Sodium/potassium-transporting ATPase subunit alpha-1	23.485	23.4626	23.2482	23.4312	23.3685	22.9597
	0.341707	0.337442	P05026;P05026-2	B7Z9S8;P05026-2;A0A8I5KNT2;A0A8I5KX89;P05026	AT1B1_HUMAN	ATP1B1	Sodium/potassium-transporting ATPase subunit beta-1	22.5737	21.7059	21.3977	21.9682	21.3795	21.3174
	2.93433	0.911171	P05067;P05067-11;P05067-7;P05067-8;P05067-9	P05067-10;P05067-11;A0A0A0MRG2;H7C2L2;H7C0V9;E9PG40;P05067-3;P05067-4;P05067-5;P05067-6;P05067-7;P05067-8;P05067-9;P05067	A4_HUMAN	APP	Amyloid-beta precursor protein	24.0941	23.9989	24.0506	23.037	23.0233	23.3497
	0.324705	-0.293517	P05089;P05089-2	P05089-2;A0A5F9ZGN6;A0A5F9ZH78;P05089	ARGI1_HUMAN	ARG1	Arginase-1	20.0869	20.468	19.355	19.9189	20.5039	20.3677
	0.871577	0.430096	P05114	H7BXJ5;A0A494C035;F2Z2W6;F2Z2Y5;P05114	HMGN1_HUMAN	HMGN1	Non-histone chromosomal protein HMG-14	24.8345	24.8004	24.1418	24.1058	24.2486	24.132
	0.321681	-0.15986	P05141	V9GYG0;P05141;P12236;P12235;Q9H0C2	ADT2_HUMAN	SLC25A5	ADP/ATP translocase 2	26.6015	26.2768	26.2474	26.856	26.4686	26.2807
	0.4675	0.237339	P05186	P05186-3;P05186	PPBT_HUMAN	ALPL	Alkaline phosphatase, tissue-nonspecific isozyme	22.1653	22.0901	21.8635	22.0062	21.9986	21.4021
	0.291896	0.255819	P05187	P05187	PPB1_HUMAN	ALPP	Alkaline phosphatase, placental type	22.3859	21.8007	21.466	21.8471	21.872	21.1659
	0.323089	-0.0589587	P05198	H0YJS4;G3V4T5;P05198	IF2A_HUMAN	EIF2S1	Eukaryotic translation initiation factor 2 subunit 1	26.735	26.9792	26.8024	26.9231	26.9066	26.8638
	0.336694	0.0972659	P05362	E7ESS4;P05362	ICAM1_HUMAN	ICAM1	Intercellular adhesion molecule 1	21.4109	21.4301	21.5183	21.132	21.5104	21.4251
	0.659068	0.428885	P05386	P05386	RLA1_HUMAN	RPLP1	Large ribosomal subunit protein P1	33.4024	32.6928	32.9512	32.7821	32.8096	32.1681
	0.695347	0.201992	P05387	P05387	RLA2_HUMAN	RPLP2	Large ribosomal subunit protein P2	33.2339	33.2118	33.0533	32.7659	32.9482	33.1789
	0.125947	0.0228093	P05388	P05388-2;F8VZS0;F8VWS0;F8VW21;F8W1K8;P05388	RLA0_HUMAN	RPLP0	Large ribosomal subunit protein uL10	32.7149	32.7186	32.7036	32.5683	32.7042	32.7962
	0.778044	0.276928	P05455	P05455	LA_HUMAN	SSB	Lupus La protein	26.1252	25.9151	25.6212	25.4727	25.6292	25.7287
	0.540095	-0.0736904	P05549-5	Q92754-2;C1K3N0;C9JXZ2;H7C5E5;H7C4N4;A0A6E1XE14;P05549-2;P05549-5;P05549-6;Q92754;P05549	AP2A_HUMAN	TFAP2A	Isoform of P05549, Isoform 2 of Transcription factor AP-2-alpha	25.4091	25.3636	25.2747	25.4547	25.333	25.4808
	0.889584	0.329702	P05783	F8VZY9;P05783	K1C18_HUMAN	KRT18	Keratin, type I cytoskeletal 18	30.1919	30.1971	30.1705	29.5141	29.9925	30.0637
	1.70798	0.15249	P05787;P05787-2	P05787-2;P05787	K2C8_HUMAN	KRT8	Keratin, type II cytoskeletal 8	28.8706	28.7887	28.9085	28.6897	28.6785	28.7422
	0.068445	0.0210946	P06241	P06241-2;P06241-3;P06241	FYN_HUMAN	FYN	Tyrosine-protein kinase Fyn	24.1248	24.0816	24.2714	24.1046	24.3099	24
	0.168883	0.173349	P06454;P06454-2	P06454-2;B8ZZQ6;P06454	PTMA_HUMAN	PTMA	Prothymosin alpha	23.7354	24.006	23.2304	22.9148	23.9981	23.5388
	0.0235754	-0.00729243	P06493	P06493-2;A0A024QZP7;E5RIU6;P06493	CDK1_HUMAN	CDK1	Cyclin-dependent kinase 1	22.8249	22.6391	22.4861	22.6092	22.7207	22.642
	0.576846	-0.158433	P06576	H0YH81;F8W079;P06576	ATPB_HUMAN	ATP5F1B	ATP synthase subunit beta, mitochondrial	23.6355	23.6662	23.5468	23.5432	23.8608	23.9198
	1.10816	0.218226	P06730;P06730-2	D6RBW1;H0Y8J7;P06730-3;P06730-2;P06730	IF4E_HUMAN	EIF4E	Eukaryotic translation initiation factor 4E	24.4603	24.2955	24.2075	24.1592	23.9918	24.1576
	0.291033	0.135104	P06733	A0A2R8Y6G6;P06733-2;P06733	ENOA_HUMAN	ENO1	Alpha-enolase	24.3757	24.7264	24.2081	24.0976	24.4715	24.3357
	0.00412704	-0.00254885	P06744;P06744-2	A0A2R8Y6C7;P06744-2;A0A2U3TZU2;A0A0J9YX90;A0A0J9YXP8;A0A0J9YYH3;K7EQ48;P06744	G6PI_HUMAN	GPI	Glucose-6-phosphate isomerase	21.0816	21.741	21.4301	21.5157	21.4552	21.2894
	0.00939549	-0.00548045	P06746	E7EW18;H0YBX1;H0YAV8;P06746	DPOLB_HUMAN	POLB	DNA polymerase beta	21.0187	21.2484	21.6539	21.2762	21.4093	21.2519
	0.835692	0.300777	P06748	P06748-2;P06748-3;A0A7I2YQC0;E5RI98;A0A7I2V2X9;A0A7I2V3G5;A0A7I2V433;A0A7I2V3U2;A0A7I2V4G8;A0A7I2V579;A0A7I2V5J8;A0A7I2V5S2;P06748	NPM_HUMAN	NPM1	Nucleophosmin	32.3121	32.3638	32.2638	31.6842	32.195	32.1582
	0.520181	1.1582	P06748-2	P06748-2;A0A7I2V5J8	NPM_HUMAN	NPM1	Isoform of P06748, Isoform 2 of Nucleophosmin	22.6886	21.8788	20.1645	21.6818	19.9006	19.6749
	0.343365	-0.118731	P06753-2	J3KN67;P06753-2;P06753-5;P06753-7;A0A087WWU8	TPM3_HUMAN	TPM3	Isoform of P06753, Isoform 2 of Tropomyosin alpha-3 chain	25.7402	25.852	25.9958	26.2142	25.9314	25.7984
	0.22084	0.0452245	P06899;P23527;P33778;Q16778	U3KQK0;Q5QNW6-2;Q99879;Q6DN03;P57053;Q5QNW6;Q16778;O60814;P62807;P23527;P06899;Q99880;Q99877;Q6DRA6;P33778;Q93079;Q8N257;P58876	H2B1B_HUMAN;H2B1J_HUMAN;H2B1O_HUMAN;H2B2E_HUMAN	H2BC11;H2BC17;H2BC21;H2BC3	Histone H2B type 1-J	33.7458	33.7442	33.5801	33.5395	33.7393	33.6556
	0.202501	-0.0954831	P07195	A8MW50;P00338-2;P00338-3;P00338-4;P00338-5;A0A5F9ZHM4;G3XAP5;F5H5G7;F5H155;F5H245;A0A3B3IS95;P07195;P07864;Q6ZMR3;P00338	LDHB_HUMAN	LDHB	L-lactate dehydrogenase B chain	24.0449	24.6166	24.2422	24.2558	24.4705	24.4639
	1.17457	-0.518673	P07199	P07199	CENPB_HUMAN	CENPB	Major centromere autoantigen B	23.3167	23.193	23.6121	23.5915	23.9208	24.1655
	1.0289	0.39079	P07237	A0A7P0T9D6;A0A7P0T9K9;A0A7P0T9U6;A0A7P0T8C0;A0A7P0T8J3;A0A7P0T8X1;H0Y3Z3;A0A7P0TA35;A0A7P0TA97;A0A7P0TA71;A0A7P0TB26;H7BZ94;B3KTQ9;I3L514;I3L4M2;I3L3P5;I3L0S0;P07237	PDIA1_HUMAN	P4HB	Protein disulfide-isomerase	23.7125	23.6861	23.4417	23.387	23.3704	22.9105
	1.23943	0.159365	P07305	P07305-2;P07305	H10_HUMAN	H1-0	Histone H1.0	25.4606	25.3776	25.398	25.3256	25.2875	25.145
	0.359317	0.0957197	P07355	H0YNP5;H0YMU9;H0YMW4;H0YN28;H0YN42;H0YM50;H0YMD0;H0YL33;P07355-2;P07355;A6NMY6	ANXA2_HUMAN	ANXA2	Annexin A2	25.4464	25.5985	25.3005	25.4658	25.3683	25.2241
	0.825604	-0.148685	P07437	Q5JP53;G3V5W4;G3V3R4;G3V2N6;G3V2R8;A0A0B4J269;P07437;Q13885;Q9BVA1;Q13509	TBB5_HUMAN	TUBB	Tubulin beta chain	28.9928	28.9797	29.1842	29.0989	29.252	29.2517
	0.0954258	0.0572796	P07737	K7EJ44;P07737	PROF1_HUMAN	PFN1	Profilin-1	22.8084	23.368	22.6673	22.869	22.9233	22.8796
	0.138781	0.0193157	P07814	P07814	SYEP_HUMAN	EPRS1	Bifunctional glutamate/proline--tRNA ligase	25.4628	25.4935	25.486	25.408	25.5627	25.4137
	1.02587	0.244612	P07900;P07900-2	P07900-2;P07900	HS90A_HUMAN	HSP90AA1	Heat shock protein HSP 90-alpha	25.5466	25.552	25.3745	25.3731	25.307	25.0591
	0.290581	0.130083	P07910-2	B4DY08;G3V5V7;G3V555;G3V575;G3V576;G3V4W0;G3V4C1;G3V2Q1;G3V2D6;P07910-2;P07910-3;P07910-4;P07910	HNRPC_HUMAN	HNRNPC	Isoform of P07910, Isoform C1 of Heterogeneous nuclear ribonucleoproteins C1/C2	26.94	26.9068	26.9219	26.4659	26.8226	27.09
	0.325297	-0.414387	P07919	P07919	QCR6_HUMAN	UQCRH	Cytochrome b-c1 complex subunit 6, mitochondrial	21.5938	21.2082	20.0287	21.8001	21.0351	21.2386
	2.31187	0.577617	P07942	C9J296;E7EPA6;G3XAI2;A0A7I2V2J0;A0A7I2V2R2;A0A7I2V2T9;A0A7I2V3I5;A0A7I2V3J7;A0A7I2V407;A0A7I2V4J9;A0A7I2V5X5;A0A7I2V682;A0A7I2V5R0;A0A7I2V5T9;P07942	LAMB1_HUMAN	LAMB1	Laminin subunit beta-1	21.4454	21.2141	21.3092	20.6282	20.8916	20.7161
	0.315451	0.0856291	P07947	J3QRU1;P07947	YES_HUMAN	YES1	Tyrosine-protein kinase Yes	26.1771	25.989	26.2912	25.9993	26.202	25.9991
	1.14756	0.167723	P07948	P07948-2;P07948	LYN_HUMAN	LYN	Tyrosine-protein kinase Lyn	23.77	23.7162	23.8026	23.4807	23.7018	23.603
	0.540957	0.0826613	P07948-2	P07948-2	LYN_HUMAN	LYN	Isoform of P07948, Isoform 2 of Tyrosine-protein kinase Lyn	21.8084	21.8841	21.8786	21.6867	21.8964	21.7399
	0.32289	0.177402	P07951-2	A7XZE4;P07951-2;P07951-3	TPM2_HUMAN	TPM2	Isoform of P07951, Isoform 2 of Tropomyosin beta chain	23.2119	23.6834	23.0752	22.9119	23.3611	23.1654
	0.885215	0.134427	P07954;P07954-2	A0A804HI24;P07954-2;P07954	FUMH_HUMAN	FH	Fumarate hydratase, mitochondrial	19.9145	19.9579	19.8114	19.6556	19.7786	19.8463
	0.203929	0.0775197	P08047	P08047-2;P08047-3;P08047	SP1_HUMAN	SP1	Transcription factor Sp1	21.4461	21.4073	21.3619	21.0386	21.4863	21.4579
	0.520454	0.619441	P08174;P08174-2;P08174-3;P08174-4;P08174-5;P08174-6;P08174-7	P08174-2;P08174-3;P08174-4;P08174-5;P08174-6;P08174-7;H3BLV0;B1AP13;A0A8Q3WLV2;A0A8Q3WKT6;A0A8Q3SI51;A0A8Q3SI94;P08174	DAF_HUMAN	CD55	Complement decay-accelerating factor	25.8168	24.7449	24.5149	24.67	24.8079	23.7403
	0.139389	0.074536	P08195	H0YH36;H0YFS2;A0A7P0T9F7;A0A7P0T8F1;A0A7P0T8U7;A0A7P0T853;A0A7P0TAT7;A0A7P0TBF8;A0A7P0TAN7;A0A7P0TAS6;A0A7P0Z4P5;A0A7P0Z4A0;P08195-2;P08195-3;P08195-4;P08195-5;F5GZS6;F5H867;P08195	4F2_HUMAN	SLC3A2	4F2 cell-surface antigen heavy chain	24.9435	24.9198	24.5286	24.9494	24.7662	24.4527
	0.892523	-0.15211	P08237;P08237-3	A0A2R8Y891;F8VZI0;P08237-2;P08237-3;P08237	PFKAM_HUMAN	PFKM	ATP-dependent 6-phosphofructokinase, muscle type	24.2913	24.3749	24.5543	24.5851	24.527	24.5648
	0.0659946	0.0228316	P08238	P07900-2;Q58FF8;P08238;P07900;Q14568	HS90B_HUMAN	HSP90AB1	Heat shock protein HSP 90-beta	26.6292	26.854	26.5945	26.5437	26.8416	26.6239
	0.64867	0.162795	P08240	P08240-2;P08240	SRPRA_HUMAN	SRPRA	Signal recognition particle receptor subunit alpha	24.2101	24.1547	23.8954	23.9053	24.0338	23.8326
	0.559032	-0.215644	P08559;P08559-2;P08559-3;P08559-4	P08559-2;P08559-3;P08559-4;Q5JPU2;P08559	ODPA_HUMAN	PDHA1	Pyruvate dehydrogenase E1 component subunit alpha, somatic form, mitochondrial	20.9752	20.8719	21.0498	21.4942	20.9448	21.1048
	0.317388	0.216546	P08574	P08574	CY1_HUMAN	CYC1	Cytochrome c1, heme protein, mitochondrial	23.4388	23.1429	22.8511	23.3261	22.8979	22.5591
	0.434357	0.0486876	P08579	P08579	RU2B_HUMAN	SNRPB2	U2 small nuclear ribonucleoprotein B''	25.7252	25.7427	25.6807	25.7496	25.6555	25.5974
	0.00605177	0.00220299	P08582	P08582-2;A0A8Q3WLY9;P08582	TRFM_HUMAN	MELTF	Melanotransferrin	23.2448	23.275	23.361	23.5175	23.2066	23.1501
	0.198884	0.0827789	P08590	P08590	MYL3_HUMAN	MYL3	Myosin light chain 3	25.5289	25.5808	25.2243	25.1323	25.4951	25.4582
	0.0989661	0.028869	P08621	P08621-4;P08621	RU17_HUMAN	SNRNP70	U1 small nuclear ribonucleoprotein 70 kDa	28.3765	28.1249	28.1821	28.0697	28.2098	28.3174
	0.511694	-0.22827	P08651-2	P08651-2;P08651-3;P08651-4;P08651-5;P08651-6;A0A286YEX4;P08651	NFIC_HUMAN	NFIC	Isoform of P08651, Isoform 1 of Nuclear factor 1 C-type	23.9919	24.318	24.4131	24.1767	24.5747	24.6564
	0.943616	0.344344	P08670	B0YJC4;P08670	VIME_HUMAN	VIM	Vimentin	24.5247	24.3325	24.0707	24.1214	23.7558	24.0176
	0.246578	0.043066	P08708	A0A075B716;H0YN73;H0YN88;H3BNC9;P08708	RS17_HUMAN	RPS17	Small ribosomal subunit protein eS17	32.1164	32.0941	32.0654	31.9154	32.1331	32.0981
	0.017847	0.00650342	P08729	P08729	K2C7_HUMAN	KRT7	Keratin, type II cytoskeletal 7	25.2067	25.0496	25.0374	25.2319	24.8788	25.1634
	0.0656756	0.0235303	P08754	P08754	GNAI3_HUMAN	GNAI3	Guanine nucleotide-binding protein G(i) subunit alpha-3	28.2129	28.2528	28.5756	28.2878	28.4203	28.2626
	0.579648	0.316114	P08758	D6RBE9;D6RCN3;E9PHT9;P08758	ANXA5_HUMAN	ANXA5	Annexin A5	20.2758	20.625	20.1053	20.1654	20.2478	19.6445
	0.221011	0.222112	P08779	P08779	K1C16_HUMAN	KRT16	Keratin, type I cytoskeletal 16	24.9675	25.225	24.1102	24.6346	24.8386	24.1631
	0.0908542	-0.0130221	P08865	C9J9K3;A0A8V8TMX1;A0A8V8TMP3;A0A8V8TLA4;A0A0C4DG17;A0A8I5KQE6;P08865	RSSA_HUMAN	RPSA	Small ribosomal subunit protein uS2	33.0724	33.0305	33.0266	32.9668	33.0665	33.1353
	0.116876	-0.0325953	P09001	E7ETU7;H0Y9G6;E9PF06;P09001	RM03_HUMAN	MRPL3	Large ribosomal subunit protein uL3m	23.4058	23.5373	23.5952	23.6642	23.5902	23.3817
	0.152895	0.0715663	P09012	M0R2B8;M0R221;M0R268;M0QXK2;M0QZG7;P09012	SNRPA_HUMAN	SNRPA	U1 small nuclear ribonucleoprotein A	23.8422	23.8997	23.3711	23.7094	23.6508	23.5381
	0.168954	-0.111163	P09038;P09038-1;P09038-2;P09038-3	P09038-1;P09038-2;P09038-3;A0A0A0MQV6;P09038	FGF2_HUMAN	FGF2	Fibroblast growth factor 2	24.5967	24.5115	24.219	24.847	24.692	24.1217
	0.0276395	0.0148462	P09132	A0A087WYR0;P09132	SRP19_HUMAN	SRP19	Signal recognition particle 19 kDa protein	25.9575	25.7359	25.8385	26.1192	25.8329	25.5353
	0.617968	0.167893	P09234	A0A0A0MRR7;P09234	RU1C_HUMAN	SNRPC	U1 small nuclear ribonucleoprotein C	27.9482	27.7802	27.9244	27.6469	27.5699	27.9322
	0.296738	-0.0422395	P09382	F8WEI7;P09382	LEG1_HUMAN	LGALS1	Galectin-1	24.2565	24.2195	24.1628	24.3547	24.1868	24.2241
	0.55443	-0.293208	P09429	Q5T7C4;B2RPK0;P09429	HMGB1_HUMAN	HMGB1	High mobility group protein B1	26.7176	27.0412	26.5323	27.3296	27.127	26.7142
	0.139724	0.0783513	P09493-3	P09493-8;P09493-9;P09493-2;P09493-3;P09493-7;Q6ZN40;H7BYY1	TPM1_HUMAN	TPM1	Isoform of P09493, Isoform 3 of Tropomyosin alpha-1 chain	24.317	24.5124	24.7081	24.7678	24.3533	24.1813
	0.0576513	0.0423717	P09493-5	P09493-5;H0YN06;H0YKJ4;H0YK48;B7Z596;A0A494BZZ2;H7BYY1;F5H7S3	TPM1_HUMAN	TPM1	Isoform of P09493, Isoform 5 of Tropomyosin alpha-1 chain	22.8444	22.2859	23.109	22.5528	22.7702	22.7892
	0.549213	0.515595	P09496-2	P09496-2;P09496-3;P09496-4;F8WF69;P09496	CLCA_HUMAN	CLTA	Isoform of P09496, Isoform Non-brain of Clathrin light chain A	20.875	21.6923	21.2803	21.3913	20.6961	20.2134
	0.363822	0.163541	P09543;P09543-2	P09543-2;P09543	CN37_HUMAN	CNP	2',3'-cyclic-nucleotide 3'-phosphodiesterase	22.4701	22.2875	21.9379	22.122	22.2157	21.8672
	0.0457598	0.0325273	P09629	P09630-2;I3L3R1;I3L383;V9GYH0;P09630;P31267;P09067;P20719;P31274;P09629;P28356;Q00444;P17481;P31268;P31273;P17482;P17509	HXB7_HUMAN	HOXB7	Homeobox protein Hox-B7	20.7759	21.0482	20.904	20.6075	20.6887	21.3344
	0.501663	0.267393	P09651;P09651-2	H0YH80;F8VZ49;F8W6I7;F8VTQ5;A0A7I2YQX9;P09651-2;P09651-3;A0A7I2V334;A0A7I2V2L6;A0A7I2V3R8;A0A7I2V3W0;A0A7I2V5H0;A0A7I2V5T1;A0A2R8Y4L2;P09651	ROA1_HUMAN	HNRNPA1	Heterogeneous nuclear ribonucleoprotein A1	25.7298	25.2781	25.0749	24.9908	25.3511	24.9387
	0.902212	-0.191509	P09661	H0YKK0;P09661	RU2A_HUMAN	SNRPA1	U2 small nuclear ribonucleoprotein A'	26.057	26.1466	25.9788	26.4217	26.1966	26.1385
	0.48126	0.251933	P09669	P09669	COX6C_HUMAN	COX6C	Cytochrome c oxidase subunit 6C	22.5675	22.8359	22.7884	22.0768	22.5631	22.7961
	0.311953	-0.0345319	P09874	A0A7I2V3E1;A0A7I2V5E9;A0A7I2V625;P09874	PARP1_HUMAN	PARP1	Poly [ADP-ribose] polymerase 1	29.1633	29.2474	29.099	29.1914	29.1893	29.2326
	0.00538309	-0.00259717	P09884	A6NMQ1;A0A7I2V2V3;P09884	DPOLA_HUMAN	POLA1	DNA polymerase alpha catalytic subunit	25.4739	25.2675	24.9463	25.2741	25.2654	25.1561
	1.31613	0.462861	P09923	P09923	PPBI_HUMAN	ALPI	Intestinal-type alkaline phosphatase	23.274	23.2754	23.0387	22.6417	23.0167	22.5411
	0.16467	-0.0635777	P0C0S5;Q71UI9;Q71UI9-4	C9J0D1;A0A494C189;Q71UI9-2;Q71UI9-4;P0C0S5;Q71UI9	H2AV_HUMAN;H2AZ_HUMAN	H2AZ1;H2AZ2	Histone H2A.Z	28.7739	28.7242	28.7139	28.8393	28.5342	29.0293
	1.11795	-0.696252	P0C7P0	P0C7P0	CISD3_HUMAN	CISD3	CDGSH iron-sulfur domain-containing protein 3, mitochondrial	21.6901	21.982	22.2617	22.9454	22.8857	22.1915
	0.326555	-0.219755	P0CAP2;P0CAP2-3	P0CAP2-2;P0CAP2-3;H8Y6P7;P0CAP2	GRL1A_HUMAN	POLR2M	DNA-directed RNA polymerase II subunit GRINL1A	18.8759	19.4237	19.6913	19.4604	19.3695	19.8204
	0.308631	0.165283	P0CG12	P0CG12	DERPC_HUMAN	DERPC	Decreased expression in renal and prostate cancer protein	25.0703	24.7562	24.3279	24.626	24.5012	24.5313
	1.2407	1.10698	P0CG38	Q6S8J3;P0CG38;P0CG39;Q9BYX7	POTEI_HUMAN	POTEI	POTE ankyrin domain family member I	21.8923	21.7792	20.8164	20.3045	20.8456	20.017
	0.570892	0.262206	P0CJ79	P0CJ79	ZN888_HUMAN	ZNF888	Zinc finger protein 888	19.2938	18.6643	18.7636	18.5266	18.6927	18.7157
	0.391687	-0.149801	P0CW18	P0CW18	PRS56_HUMAN	PRSS56	Serine protease 56	24.7413	24.2722	24.2866	24.671	24.5732	24.5053
	0.434206	0.320998	P0DI83	P0DI83;A0A1B0GTQ2;A0A1B0GWB1;A0A1C7CYW6	NARR_HUMAN	RAB34	Isoform of Q9BZG1, Ras-related protein Rab-34, isoform NARR	21.418	20.581	20.6562	20.8056	20.6495	20.2371
	1.16462	-0.188779	P0DMV8;P0DMV9	V9GZ37;Q53FA3;P0DMV8-2;A0A0G2JIW1;P0DMV9;P0DMV8;P34931	HS71A_HUMAN;HS71B_HUMAN	HSPA1A;HSPA1B	Heat shock 70 kDa protein 1A	25.5233	25.6242	25.6703	25.9117	25.6974	25.775
	1.80323	0.42242	P0DP23;P0DP24;P0DP25	G3V361;A0A590UJI2;E7EMB3;Q96HY3;P0DP24;P0DP25;P0DP23	CALM1_HUMAN;CALM2_HUMAN;CALM3_HUMAN	CALM1;CALM2;CALM3	Calmodulin-1	30.7182	30.9048	30.5595	30.3225	30.3499	30.2428
	0.196753	0.0736472	P0DP91	P0DP91;Q8N328	ERPG3_HUMAN	ERCC6	Isoform of Q03468, Chimeric ERCC6-PGBD3 protein	24.4429	24.2857	24.0879	24.019	24.3677	24.2088
	0.424502	-0.320088	P0DPB6	A0A0R4J2F3;P0DPB6	RPAC2_HUMAN	POLR1D	DNA-directed RNA polymerases I and III subunit RPAC2	21.5408	21.4797	21.2191	21.3619	22.3411	21.4969
	0.687207	0.137327	P10155;P10155-3;P10155-4;P10155-5	P10155-3;P10155-4;P10155-5;P10155	RO60_HUMAN	RO60	RNA-binding protein RO60	23.4318	23.2156	23.4897	23.3089	23.2316	23.1846
	0.44965	-0.178939	P10301	P10301	RRAS_HUMAN	RRAS	Ras-related protein R-Ras	20.2774	20.7645	20.6449	20.7524	20.8887	20.5824
	0.103999	-0.0333284	P10321	A2AEA2;O78179;O19617;A0A1W2PP77;A0A1W2PP29;Q5SS57;A0A1W2PNZ7;A0A1W2PR11;A0A1W2PRX1;A0A1W2PRZ0;A0A140T9U0;A0A140T9T1;A0A140T9W2;A0A140T9U8;A0A140T9L3;A0A140T9M0;A0A140T9M5;A0A140T9D4;A0A140T9E1;A0A140T9H5;A0A140T9J9;A0A140T9B3;A0A140T930;A0A140T937;A0A140T942;A0A140T951;A0A140T962;A0A140T912;A0A140T921;Q53YP1;A0A140TA21;A0A140TA05;A0A8Q3SIV3;Q5QT33;P01889;P10321	HLAC_HUMAN	HLA-C	HLA class I histocompatibility antigen, C alpha chain	21.9906	21.8028	21.6431	21.7448	21.8503	21.9415
	0.839003	0.314456	P10398	P10398	ARAF_HUMAN	ARAF	Serine/threonine-protein kinase A-Raf	20.5182	20.1573	20.6369	20.1937	19.9308	20.2445
	0.199013	0.135254	P10412	P10412	H14_HUMAN	H1-4	Histone H1.4	29.6059	29.339	29.2289	28.7991	29.5898	29.3791
	0.633814	0.485304	P10599	P10599-2;P10599	THIO_HUMAN	TXN	Thioredoxin	24.0688	24.581	23.5234	23.6703	23.7888	23.2582
	0.17329	0.104693	P10620	P10620-2;F5H7F6;F5H6X2;P10620	MGST1_HUMAN	MGST1	Microsomal glutathione S-transferase 1	23.1635	22.6834	22.4461	22.6647	22.504	22.8103
	0.484552	0.180084	P10644	K7EIE5;K7EJ40;X6RAV4;K7EK41;K7EM13;K7EMZ6;K7EMU2;K7EPR5;K7EPB2;K7EQK3;P10644-2;P10644	KAP0_HUMAN	PRKAR1A	cAMP-dependent protein kinase type I-alpha regulatory subunit	22.4807	22.71	22.2574	22.4408	22.3468	22.1202
	0.127162	-0.0398153	P10809	A0A7I2YQK6;A0A7I2V2X6;A0A7I2V599;P10809	CH60_HUMAN	HSPD1	60 kDa heat shock protein, mitochondrial	26.1211	26.1928	26.3992	26.1378	26.2837	26.411
	0.169318	0.0304375	P11021	A0A7P0TAI0;P11021	BIP_HUMAN	HSPA5	Endoplasmic reticulum chaperone BiP	28.8463	28.9337	28.7953	28.9306	28.8088	28.7445
	1.88647	0.780991	P11047	P11047	LAMC1_HUMAN	LAMC1	Laminin subunit gamma-1	20.9234	21.0197	20.5781	20.0268	20.2898	19.8617
	0.0710975	0.0160694	P11142	E9PS65;E9PNE6;E9PM13;A8K7Q2;E9PKE3;P11142	HSP7C_HUMAN	HSPA8	Heat shock cognate 71 kDa protein	29.4323	29.5345	29.5014	29.5902	29.4912	29.3386
	0.0443027	0.0298119	P11166	A0A6Q8PFI8;P11166	GTR1_HUMAN	SLC2A1	Solute carrier family 2, facilitated glucose transporter member 1	21.5118	20.7384	20.9835	21.0049	21.0433	21.096
	2.18722	-0.173824	P11171;P11171-2;P11171-5	A0A2R8Y7Y3;A0A2R8YD30;P11171-2;P11171-3;P11171-4;P11171-5;P11171-6;P11171	EPB41_HUMAN	EPB41	Protein 4.1	21.027	21.1064	21.0299	21.1863	21.2494	21.2491
	0.0348892	0.0452442	P11182	A0A7P0T9W1;A0A7P0Z494;P11182	ODB2_HUMAN	DBT	Lipoamide acyltransferase component of branched-chain alpha-keto acid dehydrogenase complex, mitochondrial	21.2677	20.8822	19.9479	20.6307	21.0066	20.3249
	0.0322017	0.0212434	P11233	C9J6B1;C9JYR1;C9JPE8;C9JQB3;H7C3P7;P11234-2;P11234-3;P11234;P11233	RALA_HUMAN	RALA	Ras-related protein Ral-A	25.6235	25.6134	25.3985	25.9408	25.3603	25.2706
	1.03462	0.176722	P11234-3	C9J6B1;C9JQB3;P11234-2;P11234-3;P11234	RALB_HUMAN	RALB	Isoform of P11234, Isoform 3 of Ras-related protein Ral-B	22.3878	22.5102	22.4195	22.2719	22.381	22.1344
	0.363994	0.160217	P11274	P11274-2;P11274	BCR_HUMAN	BCR	Breakpoint cluster region protein	20.3702	20.4676	20.0932	19.859	20.291	20.3004
	0.131755	-0.0644302	P11310;P11310-2	P11310-2;H0YDT5;A0A7P0T8G6;Q5T4U5;A0A7P0TB51;A0A7P0TB55;P11310	ACADM_HUMAN	ACADM	Medium-chain specific acyl-CoA dehydrogenase, mitochondrial	21.9718	21.6679	21.7733	22.1514	21.843	21.6118
	0.190999	-0.0229289	P11387	P11387	TOP1_HUMAN	TOP1	DNA topoisomerase 1	27.3298	27.3383	27.3771	27.3927	27.4339	27.2874
	1.48666	0.0909093	P11388;P11388-2;P11388-3;P11388-4	P11388-2;P11388-3;P11388-4;P11388	TOP2A_HUMAN	TOP2A	DNA topoisomerase 2-alpha	26.9557	26.9094	26.8662	26.838	26.8223	26.7983
	0.353664	0.212131	P11413;P11413-2;P11413-3	P11413-2;P11413-3;E7EUI8;A0A8Q3WL95;A0A8Q3SIN6;A0A8Q3SJB9;A0A8Q3SIS5;P11413	G6PD_HUMAN	G6PD	Glucose-6-phosphate 1-dehydrogenase	21.1985	21.5637	21.1899	20.6716	21.3246	21.3195
	1.53797	-0.533239	P11532-5;P11532-6	A0A075B6G3;P11532-11;P11532-12;P11532-13;P11532-14;P11532-15;P11532-16;P11532-17;A0A5H1ZRP7;A0A5H1ZRP8;A0A5H1ZRP9;A0A5H1ZRQ1;A0A5H1ZRQ8;A0A5H1ZRR9;A0A7P0T8I2;A0A7P0TAX0;A0A7P0TAM6;H0Y304;A0A804HJY0;A0A804HKR4;A0A804HKY9;P11532-2;P11532-3;P11532-4;P11532-5;P11532-6;P11532-7;P11532-8;P11532-9;A0A7P0Z4P7;A0A7P0Z4Q6;A0A087WV90;P11532	DMD_HUMAN	DMD	Isoform of P11532, Isoform 15 of Dystrophin	22.3226	22.0673	22.5922	22.908	22.9153	22.7587
	0.519976	-0.425894	P11586	V9GYY3;V9GZ78;A0A494C1T2;A0A8V8TMA4;A0A8V8TMA9;A0A8V8TKR5;A0A8V8TKS0;A0A8V8TKT4;A0A8V8TL50;F5H2F4;P11586	C1TC_HUMAN	MTHFD1	C-1-tetrahydrofolate synthase, cytoplasmic	23.0221	23.1537	23.8588	23.3255	23.8007	24.1861
	0.222132	0.0809937	P11940	E7ERJ7;E7EQV3;P11940-2;H0YAR2;H0YAP2;A0A6I8PLA1;A0A6I8PS38;A0A6Q8JFT6;Q4VXU2-2;A0A7I2YQ88;A0A7I2YQE4;A0A087WTT1;A0A7I2V4N4;P11940;Q4VXU2	PABP1_HUMAN	PABPC1	Polyadenylate-binding protein 1	28.7095	28.5918	28.3164	28.6216	28.3777	28.3754
	0.526914	-0.416727	P12004	P12004	PCNA_HUMAN	PCNA	Proliferating cell nuclear antigen	21.4592	22.307	22.2321	22.8448	22.2744	22.1294
	0.152351	-0.0825094	P12235	V9GYG0;P12235	ADT1_HUMAN	SLC25A4	ADP/ATP translocase 1	21.8175	21.3563	21.444	21.8119	21.3381	21.7153
	1.53316	0.341774	P12236	V9GYG0;P12236;P12235	ADT3_HUMAN	SLC25A6	ADP/ATP translocase 3	24.5753	24.5238	24.3248	23.9951	24.1985	24.2049
	1.52339	0.254209	P12268	E7ETK5;H0Y4R1;A0A7I2YQK5;A0A7I2V2T3;A0A994J749;P12268	IMDH2_HUMAN	IMPDH2	Inosine-5'-monophosphate dehydrogenase 2	26.8659	26.8291	27.0234	26.7492	26.6115	26.5952
	0.433721	-0.275865	P12270	P12270-2;P12270	TPR_HUMAN	TPR	Nucleoprotein TPR	18.7565	19.3967	19.3803	19.794	19.234	19.3332
	0.111019	0.0650609	P12277	A0A0S2Z471;G3V461;G3V4N7;P12277	KCRB_HUMAN	CKB	Creatine kinase B-type	21.2249	21.5979	21.2929	21.4849	21.4857	20.9498
	0.0789849	-0.0198746	P12956	B1AHC9;P12956-2;P12956	XRCC6_HUMAN	XRCC6	X-ray repair cross-complementing protein 6	23.4022	23.3895	23.2187	23.2738	23.3088	23.4873
	0.715274	0.368115	P13010	C9JZ81;H7C0H9;P13010	XRCC5_HUMAN	XRCC5	X-ray repair cross-complementing protein 5	22.6641	22.6528	22.0329	22.1498	22.2268	21.8689
	1.5272	0.401838	P13073	P13073	COX41_HUMAN	COX4I1	Cytochrome c oxidase subunit 4 isoform 1, mitochondrial	22.159	21.7712	21.9349	21.5652	21.6262	21.4681
	0.154671	-0.134644	P13498	H3BR52;H3BPZ7;H3BPX1;H3BNP7;A0A8Q3WLM1;A0A8Q3WL20;A0A8Q3WL27;A0A8Q3SIJ9;A0A8Q3SJ80;P13498	CY24A_HUMAN	CYBA	Cytochrome b-245 light chain	24.6944	23.6753	23.8485	24.3067	24.0429	24.2726
	0.64331	-0.144651	P13639	P13639	EF2_HUMAN	EEF2	Elongation factor 2	31.6564	31.6284	31.8631	31.7237	31.9496	31.9085
	0.914712	0.980857	P13645	A0A1B0GVI3;P13645	K1C10_HUMAN	KRT10	Keratin, type I cytoskeletal 10	29.8102	30.328	28.9842	28.7922	29.2319	28.1557
	0.714556	0.697364	P13647	H0YIN9;H0YI76;P13647	K2C5_HUMAN	KRT5	Keratin, type II cytoskeletal 5	27.3021	27.5796	26.3033	26.4529	26.6945	25.9455
	0.383575	0.125623	P13667	C9JMN9;A0A499FI48;P13667	PDIA4_HUMAN	PDIA4	Protein disulfide-isomerase A4	24.1688	24.3948	24.2113	23.93	24.3422	24.1259
	0.983234	0.0823816	P13674	P13674-2;P13674-3;P13674	P4HA1_HUMAN	P4HA1	Prolyl 4-hydroxylase subunit alpha-1	25.3259	25.2037	25.265	25.2145	25.1552	25.1777
	1.10031	0.202818	P13797;P13797-2	P13797-2;P13797-3;P13797	PLST_HUMAN	PLS3	Plastin-3	21.2984	21.4599	21.1855	21.1632	21.0469	21.1253
	3.53493	-0.258711	P13984	P13984	T2FB_HUMAN	GTF2F2	General transcription factor IIF subunit 2	25.2959	25.2901	25.3251	25.5329	25.5979	25.5564
	0.664036	0.326071	P13987;P13987-2	A0A2U3TZL5;P13987-2;E9PNW4;H0YET2;P13987	CD59_HUMAN	CD59	CD59 glycoprotein	26.677	26.4783	26.6421	26.0986	26.6987	26.0219
	0.515799	0.664911	P14174	P14174	MIF_HUMAN	MIF	Macrophage migration inhibitory factor	21.7573	22.3465	20.7427	20.3231	21.3427	21.1859
	1.25328	0.295083	P14314;P14314-2	K7ELL7;P14314-2;A0A0C4DGP4;P14314	GLU2B_HUMAN	PRKCSH	Glucosidase 2 subunit beta	20.929	21.0133	20.6658	20.6353	20.5754	20.5121
	0.854898	0.278949	P14324;P14324-2	P14324-2;A0A087X1D8;A0A087WTP2;A0A087WVN4;P14324	FPPS_HUMAN	FDPS	Farnesyl pyrophosphate synthase	22.2109	22.1246	21.7244	21.7098	21.7861	21.7271
	0.320981	-0.0450382	P14373	H0Y551;A0A140T9V9;A0A140T9N6;A0A140T9Q6;A0A140T9B9;P14373-2;P14373	TRI27_HUMAN	TRIM27	Zinc finger protein RFP	22.8978	23.0466	23.06	23.0947	23.0129	23.032
	0.213105	0.165705	P14384	F8VVI6;F8W111;P14384	CBPM_HUMAN	CPM	Carboxypeptidase M	21.3896	21.7172	22.1513	21.7724	21.8128	21.1757
	0.274989	0.0488917	P14618	H3BTN5;H3BQ34;B4DNK4;A0A8V8TNX9;A0A8V8TMM5;P14618-2;P14618-3;A0A804F6T5;A0A804F729;P14618	KPYM_HUMAN	PKM	Pyruvate kinase PKM	25.6911	25.7853	25.5531	25.6164	25.594	25.6724
	0.333709	0.144654	P14625	H0YIV0;A0A7P0T917;A0A7P0T823;A0A7P0TAT8;A0A7P0TAE1;P14625	ENPL_HUMAN	HSP90B1	Endoplasmin	22.5004	22.6242	22.2108	22.3138	22.519	22.0686
	1.17767	0.224974	P14649	F8W1I5;A0A8Q3SIC5;A0A8Q3SIF0;A0A8Q3SI90;P14649	MYL6B_HUMAN	MYL6B	Myosin light chain 6B	22.1889	22.1713	21.9982	21.8373	21.8199	22.0262
	0.0641679	0.018472	P14678;P14678-2;P14678-3	P14678-2;P14678-3;P14678	RSMB_HUMAN	SNRPB	Small nuclear ribonucleoprotein-associated proteins B and B'	28.5325	28.2705	28.2855	28.4327	28.3511	28.2493
	0.495857	0.115095	P14866	P14866	HNRPL_HUMAN	HNRNPL	Heterogeneous nuclear ribonucleoprotein L	24.6952	24.4395	24.4437	24.434	24.4941	24.305
	1.19854	-0.253268	P14868	P14868-2;P14868	SYDC_HUMAN	DARS1	Aspartate--tRNA ligase, cytoplasmic	24.3173	24.6046	24.5803	24.6892	24.8192	24.7536
	0.825286	-0.129878	P14923	P14923	PLAK_HUMAN	JUP	Junction plakoglobin	25.0986	25.1748	25.2329	25.2777	25.4145	25.2038
	0.0207642	0.0282694	P15170-2;P15170-3	P15170-2;P15170-3;P15170	ERF3A_HUMAN	GSPT1	Isoform of P15170, Isoform 2 of Eukaryotic peptide chain release factor GTP-binding subunit ERF3A	23.661	23.6089	23.0065	23.9281	23.6553	22.6083
	0.0845431	-0.042551	P15311	P15311	EZRI_HUMAN	EZR	Ezrin	23.8721	23.6244	23.3202	23.6804	23.7669	23.4971
	0.123524	-0.0937131	P15328	P15328	FOLR1_HUMAN	FOLR1	Folate receptor alpha	21.2561	20.5774	21.461	21.0755	21.332	21.1683
	0.616571	-0.316183	P15531;P15531-2	J3KPD9;E7ERL0;P22392-2;Q32Q12;P15531-2;P15531	NDKA_HUMAN	NME1	Nucleoside diphosphate kinase A	23.0955	23.8782	23.6044	23.826	23.8854	23.8153
	0.498525	0.0864245	P15880	H0YEN5;E9PQD7;P15880	RS2_HUMAN	RPS2	Small ribosomal subunit protein uS5	32.8943	32.8689	32.9328	32.6667	32.8685	32.9016
	0.199459	0.141116	P15924	P15924-2;P15924-3;P15924	DESP_HUMAN	DSP	Desmoplakin	25.1216	25.1758	24.4974	24.9347	24.973	24.4637
	0.443378	-0.186375	P16070;P16070-10;P16070-11;P16070-12;P16070-13;P16070-14;P16070-16;P16070-17;P16070-18;P16070-3;P16070-4;P16070-5;P16070-6;P16070-7;P16070-8	P16070-10;P16070-11;P16070-12;P16070-13;P16070-14;P16070-16;P16070-17;P16070-15;P16070-18;H0YDX6;H0YCV9;H0YDW7;H0YD13;H0YD17;H0Y5E4;H0Y2P0;P16070-3;P16070-4;P16070-5;P16070-6;P16070-7;P16070-8;P16070-9;P16070	CD44_HUMAN	CD44	CD44 antigen	24.8152	25.114	25.0841	25.4197	25.2537	24.8991
	0.29432	0.11202	P16104	H0YFX9;Q9BTM1-2;A0A0U1RR32;A0A3B3IS11;A0A0U1RRH7;P0C0S8;P04908;P20671;Q9BTM1;Q99878;Q7L7L0;Q8IUE6;P16104;Q93077;Q96KK5	H2AX_HUMAN	H2AX	Histone H2AX	33.5363	33.409	33.0434	33.1329	33.2821	33.2377
	0.658468	0.452079	P16383;P16383-2	P16383-2;P16383	GCFC2_HUMAN	GCFC2	Intron Large complex component GCFC2	21.2026	21.0208	20.5347	20.9173	20.3793	20.1053
	1.5922	0.434598	P16401	P16401	H15_HUMAN	H1-5	Histone H1.5	31.5787	31.4236	31.2028	30.8441	31.0263	31.0309
	1.96713	0.50411	P16403	P16402;P10412;P16403	H12_HUMAN	H1-2	Histone H1.2	32.8122	32.5924	32.5037	32.0231	32.1276	32.2452
	0.251522	-0.199831	P16444	P16444	DPEP1_HUMAN	DPEP1	Dipeptidase 1	25.6204	25.675	26.2548	25.6809	25.966	26.5028
	0.929978	0.132705	P16615	H7C5W9;P16615-4;P16615-5;P16615-2;P16615-3;P16615	AT2A2_HUMAN	ATP2A2	Sarcoplasmic/endoplasmic reticulum calcium ATPase 2	23.5812	23.4653	23.5042	23.4904	23.2936	23.3685
	0.0807457	-0.0719287	P16949;P16949-2	P16949-2;A2A2D0;P16949	STMN1_HUMAN	STMN1	Stathmin	19.3426	20.172	19.695	19.4321	20.1281	19.8652
	1.61783	0.350061	P16989	P16989-3;P16989	YBOX3_HUMAN	YBX3	Y-box-binding protein 3	29.0198	28.8473	28.8946	28.4033	28.632	28.6762
	0.363457	-0.14085	P16989-2	P16989-2	YBOX3_HUMAN	YBX3	Isoform of P16989, Isoform 2 of Y-box-binding protein 3	26.4599	26.175	26.7327	26.6003	26.5679	26.6219
	1.3674	-0.515731	P17010;P17010-2;P17010-3	E9PEP7;P08048-2;P08048-3;P17010-2;P17010-3;P08048;P17010	ZFX_HUMAN	ZFX	Zinc finger X-chromosomal protein	21.0855	21.2075	21.6346	21.7425	21.7964	21.9359
	0.388161	0.324986	P17020	Q9UK12-2;Q9NV72-2;Q14593-2;Q14590-2;P35789-2;P35789-3;Q5VIY5-2;P17040-2;P17040-3;Q09FC8-4;Q09FC8-5;Q09FC8-2;Q09FC8-3;Q09FC8-6;K7EIK6;Q6ZN19-3;P17035-2;Q9UJU3-2;P52740-2;F8VS19;Q86YE8-2;Q86YE8-3;Q86YE8-4;A0A1W2PNY2;A0A3Q5AD24;M0QXU9;M0QZI7;P17022-2;Q86WZ6-2;Q9UJW7-2;Q3KP31-2;Q8N8E2-2;Q8N8E2-3;K7EPV5;Q96NJ3-2;Q76KX8-2;A0A087WVZ7;Q8N8Z8-2;K7ENM7;A0A494BZV4;A0A494C069;Q96NJ3;P17040;P35789;Q8N8Z8;Q8NH…	ZNF16_HUMAN	ZNF16	Zinc finger protein 16	24.0427	24.3319	24.3545	23.264	24.3946	24.0955
	0.4278	0.340713	P17028	P17028	ZNF24_HUMAN	ZNF24	Zinc finger protein 24	21.3264	20.9335	20.5799	20.8071	20.0838	20.9267
	0.328783	-0.167598	P17096	A0A1W2PRV2;A0A994J705;A0A669KAX1;A0A994J434;P17096-2;P17096-3;P17096	HMGA1_HUMAN	HMGA1	High mobility group protein HMG-I/HMG-Y	27.2589	27.0602	26.9311	27.6215	27.1076	27.0238
	0.941332	-0.363544	P17097;P17097-2	E9PJZ3;E9PJX9;F5H290;P17097-2;P17097	ZNF7_HUMAN	ZNF7	Zinc finger protein 7	20.4826	20.4851	20.8834	21.2217	20.8925	20.8274
	0.0548869	-0.0489839	P17275	P17275	JUNB_HUMAN	JUNB	Transcription factor JunB	21.1937	20.1423	20.5378	20.7255	20.6333	20.662
	0.194142	0.0380414	P17480	P17480-2;E9PMM2;E9PKP7;A0A994J4N4;P17480	UBF1_HUMAN	UBTF	Nucleolar transcription factor 1	29.817	29.7702	29.6664	29.6086	29.7122	29.8186
	0.299978	0.182178	P17480-2	P17480-2;E9PKP7;A0A994J4N4	UBF1_HUMAN	UBTF	Isoform of P17480, Isoform UBF2 of Nucleolar transcription factor 1	27.3772	26.8651	26.6869	27.0592	26.6225	26.7011
	0.458254	0.322508	P17655	P17655-2;P17655	CAN2_HUMAN	CAPN2	Calpain-2 catalytic subunit	24.8487	25.2347	24.864	24.1228	24.8165	25.0405
	0.213906	-0.0976493	P17676;P17676-2;P17676-3	P17676-2;P17676-3;P17676	CEBPB_HUMAN	CEBPB	CCAAT/enhancer-binding protein beta	22.0304	22.1889	22.1822	21.8976	22.4497	22.3472
	0.112527	-0.0422255	P17844	J3KTA4;J3KTQ4;X6RLV5;P17844-2;J3QR02;J3QRQ7;A0A7I2V2S0;A0A7I2V507;P17844	DDX5_HUMAN	DDX5	Probable ATP-dependent RNA helicase DDX5	29.3883	29.1961	29.0776	29.4511	29.2348	29.1028
	0.327951	0.0320892	P17858	P17858-2;P17858	PFKAL_HUMAN	PFKL	ATP-dependent 6-phosphofructokinase, liver type	24.3424	24.2229	24.2563	24.249	24.2062	24.2701
	0.936213	0.148921	P17980	R4GNH3;E9PLG2;E9PMD8;E9PN50;E9PKD5;P17980	PRS6A_HUMAN	PSMC3	26S proteasome regulatory subunit 6A	21.7436	21.8676	21.895	21.5974	21.7954	21.6667
	0.639022	-0.112886	P17987	E7ERF2;E7EQR6;P17987	TCPA_HUMAN	TCP1	T-complex protein 1 subunit alpha	23.1754	23.3664	23.11	23.2922	23.3644	23.3338
	0.0833861	-0.047032	P18074	A8MX75;E7EVE9;A0A804HK53;P18074	ERCC2_HUMAN	ERCC2	General transcription and DNA repair factor IIH helicase subunit XPD	22.0729	22.1315	22.2474	22.5759	22.074	21.9429
	0.946861	-0.109543	P18077	P18077	RL35A_HUMAN	RPL35A	Large ribosomal subunit protein eL33	32.3256	32.4264	32.3502	32.3953	32.4858	32.5498
	0.0202498	-0.00389036	P18085	C9JAK5;U3KQF2;P18085	ARF4_HUMAN	ARF4	ADP-ribosylation factor 4	22.1285	22.0241	22.06	21.9736	22.0829	22.1678
	0.999378	0.134654	P18124	A8MUD9;P18124	RL7_HUMAN	RPL7	Large ribosomal subunit protein uL30	32.8633	32.7676	32.7944	32.5631	32.7099	32.7483
	0.955092	0.099542	P18583-5	P18583-2;P18583-3;P18583-4;P18583-5;P18583-6;P18583-7;P18583-8;P18583-9;P18583-10;P18583	SON_HUMAN	SON	Isoform of P18583, Isoform D of Protein SON	23.4427	23.4528	23.3877	23.2634	23.3081	23.4132
	0.397141	0.0849711	P18615	P18615-3;P18615-4;P18615	NELFE_HUMAN	NELFE	Negative elongation factor E	23.4467	23.4885	23.356	23.191	23.3772	23.4681
	1.51412	0.308353	P18621;P18621-3	J3KRB3;J3KRX5;J3KSJ0;P18621-3;A0A087WWH0;A0A087WXM6;J3QQT2;A0A087WY81;J3QS96;A0A0A6YYL6;P18621	RL17_HUMAN	RPL17	Large ribosomal subunit protein uL22	32.8992	32.8128	32.6992	32.3486	32.5503	32.5873
	0.448546	-0.325337	P18669	P18669	PGAM1_HUMAN	PGAM1	Phosphoglycerate mutase 1	20.0869	20.9377	20.5099	20.6449	21.2218	20.6438
	0.0824646	-0.0341962	P18754;P18754-2	C9J3R0;P18754-2;C9JW69;C9JRH2;C9JQZ4;C9JMJ4;P18754	RCC1_HUMAN	RCC1	Regulator of chromosome condensation	23.4546	23.3657	23.0042	23.3125	23.3944	23.2202
	1.37668	0.835344	P18827	P18827	SDC1_HUMAN	SDC1	Syndecan-1	25.9777	25.4815	25.0225	24.7684	24.5454	24.6618
	0.55041	0.277767	P18846;P18846-2	P18846-2;P18846	ATF1_HUMAN	ATF1	Cyclic AMP-dependent transcription factor ATF-1	22.3668	22.4796	21.7859	21.9575	22.0239	21.8175
	0.29293	0.0716235	P18850	A0A7P0T9H5;A0A7P0T9V3;A0A7P0T8R5;A0A7P0TB89;A0A7P0TAF2;A0A7P0TAH1;A0A7P0Z4I7;A0A7P0Z421;P18850	ATF6A_HUMAN	ATF6	Cyclic AMP-dependent transcription factor ATF-6 alpha	21.465	21.3004	21.16	21.1937	21.1899	21.327
	0.0617739	-0.0345974	P18858	P18858-2;P18858-3;B4E135;M0R0Q7;M0R254;A0A8V8TQC4;A0A8V8TQC8;A0A8V8TQQ3;A0A8V8TQQ7;A0A8V8TPA5;A0A8V8TPB0;A0A8V8TPH4;A0A8V8TPH8;A0A8V8TNZ9;A0A8V8TP03;F5GZ28;P18858	DNLI1_HUMAN	LIG1	DNA ligase 1	22.2068	21.9409	21.5864	22.0927	21.8914	21.8537
	0.141413	0.0661723	P18887	F5H8D7;P18887	XRCC1_HUMAN	XRCC1	DNA repair protein XRCC1	23.2929	23.4211	23.1147	23.5043	23.0235	23.1024
	0.236924	-1.10375	P19013	Q86Y46-2;P19013;Q86Y46;Q3SY84	K2C4_HUMAN	KRT4	Keratin, type II cytoskeletal 4	25.2464	22.4424	22.1936	27.4934	22.9866	22.7137
	0.300223	0.399213	P19256;P19256-2;P19256-3	H0YDI1;B1AMW1;P19256-2;P19256-3;P19256	LFA3_HUMAN	CD58	Lymphocyte function-associated antigen 3	22.4055	23.0929	22.1811	23.0215	22.0366	21.4237
	0.426409	-0.122973	P19338	C9JLB1;H7BY16;A0A7I2V2S8;A0A7I2V349;A0A7I2V2U7;A0A7I2V3F3;A0A7I2V428;A0A7I2V506;A0A7I2V5M5;A0A7I2V699;P19338	NUCL_HUMAN	NCL	Nucleolin	32.695	32.6237	32.6066	32.5292	32.841	32.924
	1.93799	0.356822	P19387	P19387	RPB3_HUMAN	POLR2C	DNA-directed RNA polymerase II subunit RPB3	23.8021	23.9675	23.9624	23.562	23.6531	23.4464
	0.559749	0.187742	P19388	A0A0A0MQR7;A0A087WVZ9;P19388	RPAB1_HUMAN	POLR2E	DNA-directed RNA polymerases I, II, and III subunit RPABC1	24.1642	24.419	24.4108	23.8998	24.295	24.2359
	0.273554	-0.0999578	P19447	A0A2R8Y6W8;A0A2R8Y762;A0A2R8Y5L2;A0A2R8YES7;H7C309;P19447	ERCC3_HUMAN	ERCC3	General transcription and DNA repair factor IIH helicase subunit XPB	23.2577	23.3881	23.4118	23.1758	23.5797	23.602
	1.20895	0.33695	P19525	A0A7P0TBA9;A0A7P0TAL9;P19525-2;P19525	E2AK2_HUMAN	EIF2AK2	Interferon-induced, double-stranded RNA-activated protein kinase	22.2142	22.1405	21.837	21.6073	21.7595	21.8141
	1.44075	-0.279904	P19784	H3BNI9;P19784	CSK22_HUMAN	CSNK2A2	Casein kinase II subunit alpha'	26.168	26.0379	25.9655	26.3322	26.4574	26.2215
	0.401372	0.240528	P20020;P20020-1;P20020-4;P20020-6	P20020-1;P20020-2;P20020-4;P20020-5;P20020-6;P23634-2;P23634-3;P23634-4;P23634-5;P23634-6;P23634-7;P23634-8;A0A994J4Z0;P23634;P20020	AT2B1_HUMAN	ATP2B1	Plasma membrane calcium-transporting ATPase 1	24.2709	23.7839	23.4975	23.8418	23.4864	23.5026
	0.901086	0.151285	P20042	P20042	IF2B_HUMAN	EIF2S2	Eukaryotic translation initiation factor 2 subunit 2	26.6396	26.4767	26.4804	26.3183	26.3299	26.4948
	0.283021	0.0835775	P20290	D6RDG3;H0Y9Y1;P20290-2;A0A7I2YQL2;A0A7I2V3T6;A0A7I2V5Y3;P20290	BTF3_HUMAN	BTF3	Transcription factor BTF3	30.3063	30.5703	30.5815	30.2469	30.4892	30.4713
	0.00786966	0.00464567	P20585	A0A590UKC9;A0A590UJW0;A0A590UJN8;P20585	MSH3_HUMAN	MSH3	DNA mismatch repair protein Msh3	24.9377	24.4706	24.6683	24.9654	24.5562	24.5411
	0.214964	0.256201	P20618	P20618	PSB1_HUMAN	PSMB1	Proteasome subunit beta type-1	23.5227	23.2336	22.891	23.5512	23.1938	22.1337
	0.169962	0.0977987	P20700	E9PBF6;A0A0D9SFE5;P20700	LMNB1_HUMAN	LMNB1	Lamin-B1	22.7228	22.8708	22.3034	22.7901	22.328	22.4854
	0.111773	-0.065848	P20810-10;P20810-5;P20810-6;P20810-7;P20810-9	P20810-10;A0A6Q8PFF6;A0A6Q8PFE5;E7EVY3;A0A6Q8PFR3;A0A6Q8PG72;A0A6Q8PGN6;A0A6Q8PGG5;A0A6Q8PH20;E7ES10;P20810-2;P20810-3;P20810-4;P20810-5;P20810-6;P20810-7;P20810-8;P20810-9;E7EQ12;E7EQA0;H0YD33;H0Y9H6;H0Y7F0;B7Z574;E9PCH5;E9PDE4;A0A0C4DGB5;P20810	ICAL_HUMAN	CAST	Isoform of P20810, Isoform 10 of Calpastatin	21.898	21.7712	21.3411	21.7823	21.936	21.4895
	0.647691	0.1289	P20839;P20839-3;P20839-5;P20839-6;P20839-7	C9J381;P20839-2;P20839-3;P20839-4;P20839-5;P20839-6;P20839-7;A0A3B3IRL5;P20839	IMDH1_HUMAN	IMPDH1	Inosine-5'-monophosphate dehydrogenase 1	26.0464	25.9444	26.2335	25.9887	25.8872	25.9616
	0.527758	0.115576	P20908	P20908-2;P20908	CO5A1_HUMAN	COL5A1	Collagen alpha-1(V) chain	24.0437	23.8353	23.7405	23.8257	23.7415	23.7056
	0.380629	0.254571	P20930	P20930	FILA_HUMAN	FLG	Filaggrin	22.0718	22.1655	22.2601	21.5407	22.4502	21.7427
	0.317789	-0.0673885	P21127	Q9UQ88-2;Q9UQ88-3;Q9UQ88-4;Q9UQ88-9;P21127-10;P21127-12;A0A0D9SEI3;A0A0D9SEN2;A0A0D9SER5;P21127-2;P21127-3;P21127-4;P21127-5;P21127-6;P21127-8;P21127-9;Q9UQ88-10;Q5QPR3;Q5QPR4;Q9UQ88;P21127	CD11B_HUMAN	CDK11B	Cyclin-dependent kinase 11B	27.0668	26.9386	27.2026	27.1207	27.2155	27.0741
	0.522769	0.155577	P21333;P21333-2	A0A7P0NMY4;Q60FE5;P21333-2;P21333	FLNA_HUMAN	FLNA	Filamin-A	23.0015	22.8813	22.6087	22.7447	22.7246	22.5554
	0.511997	0.151194	P21359;P21359-2;P21359-6	P21359-2;P21359-6;H0Y465;A0A8I5KSM3;A0A8I5KSC3;A0A8Q3WL04;A0A8I5KWR6;A0A8I5KWT7;A0A8I5KYK6;J3QSG6;P21359	NF1_HUMAN	NF1	Neurofibromin	22.9506	22.8437	22.5774	22.7592	22.6301	22.529
	1.21752	0.33812	P21589	P21589	5NTD_HUMAN	NT5E	5'-nucleotidase	22.741	22.7879	22.5401	22.1408	22.4367	22.4773
	0.277907	0.127318	P21796	C9JI87;P21796	VDAC1_HUMAN	VDAC1	Voltage-dependent anion-selective channel protein 1	22.1665	22.2318	21.6603	21.9176	21.9377	21.8214
	0.103743	0.0313492	P22087	M0R1H0;M0R0P1;M0R2Q4;M0R2U2;M0R2B0;M0R299;M0QXL5;P22087	FBRL_HUMAN	FBL	rRNA 2'-O-methyltransferase fibrillarin	28.234	28.0817	27.9176	28.1632	27.9727	28.0034
	1.02886	1.18211	P22102	F8WD69;C9JZG2;C9JTV6;C9JKQ7;P22102-2;C9JBJ1;P22102	PUR2_HUMAN	GART	Trifunctional purine biosynthetic protein adenosine-3	27.7978	26.6808	26.1198	25.3067	25.6812	26.0642
	0.12216	-0.0755234	P22234	P22234-2;E9PBS1;D6RF62;P22234	PUR6_HUMAN	PAICS	Bifunctional phosphoribosylaminoimidazole carboxylase/phosphoribosylaminoimidazole succinocarboxamide synthetase	21.6024	21.9189	21.6055	21.6923	22.1674	21.4936
	0.0928513	0.0959454	P22392-2	P22392-2;Q32Q12;O60361;P22392	NDKB_HUMAN	NME2	Isoform of P22392, Isoform 3 of Nucleoside diphosphate kinase B	22.3129	22.1244	21.6232	21.6381	21.5991	22.5355
	0.525314	0.159396	P22626	P22626-2;A0A024RA28;A0A087WUI2;A0A7I2V323;A0A7I2V3P1;A0A7I2V3P7;A0A7I2V4I6;A0A7I2V4N1;A0A7I2V4S4;P22626	ROA2_HUMAN	HNRNPA2B1	Heterogeneous nuclear ribonucleoproteins A2/B1	25.295	24.9757	24.9435	25.0342	24.9177	24.784
	0.23988	0.186394	P22695	H3BRG4;P22695	QCR2_HUMAN	UQCRC2	Cytochrome b-c1 complex subunit 2, mitochondrial	20.9864	21.1985	20.6893	21.2992	20.4233	20.5924
	1.1324	-0.313752	P23142;P23142-2;P23142-3;P23142-4	B1AHL2;P23142-2;P23142-3;P23142-4;P23142	FBLN1_HUMAN	FBLN1	Fibulin-1	20.131	20.1123	19.7855	20.1914	20.3783	20.4004
	0.083237	-0.0683969	P23193	Q5JRI7;A0A1W2PPZ5;B7Z4S1;A0A1W2PRL9;A0A0A0MT58;P23193-2;Q15560-2;Q15560;P23193	TCEA1_HUMAN	TCEA1	Transcription elongation factor A protein 1	21.3376	20.9096	20.7501	20.651	21.4525	21.099
	0.0515587	-0.0265605	P23246	A0A8Q3WMA7;P23246-2;P23246	SFPQ_HUMAN	SFPQ	Splicing factor, proline- and glutamine-rich	29.2198	29.0139	28.6834	29.1551	28.9719	28.8698
	0.46721	-0.15447	P23258	A0A7P0T9G6;P23258;Q9NRH3	TBG1_HUMAN	TUBG1	Tubulin gamma-1 chain	22.8519	22.7073	23.0732	23.2197	22.9065	22.9696
	0.186554	0.143863	P23284	A0A7P0TB45;A0A7P0Z497;P23284	PPIB_HUMAN	PPIB	Peptidyl-prolyl cis-trans isomerase B	25.2497	25.3975	24.5253	25.0385	25.0263	24.676
	0.12625	-0.0433057	P23396	P23396-2;H0YEU2;H0YF32;H0YCJ7;E9PPU1;E9PQ96;E9PJH4;E9PK82;E9PL09;F2Z2S8;P23396	RS3_HUMAN	RPS3	Small ribosomal subunit protein uS3	32.6734	32.7125	32.8719	32.5769	32.8865	32.9243
	0.207443	0.0875289	P23458	A0A5F9ZH07;A0A5F9ZHN8;A0A5F9ZI39;A0A5F9ZHW0;A0A0A0N0M2;A0A8V8TPQ9;A0A8V8TMY8;P23458	JAK1_HUMAN	JAK1	Tyrosine-protein kinase JAK1	22.1951	22.3352	21.8167	21.9451	22.0166	22.1227
	0.352106	-0.151134	P23526	P23526-2;P23526	SAHH_HUMAN	AHCY	Adenosylhomocysteinase	20.8691	21.2672	21.0631	20.9449	21.3476	21.3603
	0.906938	0.488546	P23528	Q9Y281-3;G3V1A4;E9PQB7;E9PP50;E9PLJ3;E9PK25;Q9Y281;P23528	COF1_HUMAN	CFL1	Cofilin-1	22.5285	23.1804	22.3765	22.1172	22.2864	22.2161
	0.586182	0.140405	P23588	E7EX17;F8VX11;P23588-2;P23588	IF4B_HUMAN	EIF4B	Eukaryotic translation initiation factor 4B	26.4664	26.4922	26.1643	26.2035	26.2675	26.2306
	0.192221	-0.137543	P23769;P23769-2	P23769-2;A0A8Q3WLD0;P23769	GATA2_HUMAN	GATA2	Endothelial transcription factor GATA-2	21.9366	21.4997	21.0221	21.6142	21.7564	21.5005
	0.455045	-0.162849	P23921	P23921	RIR1_HUMAN	RRM1	Ribonucleoside-diphosphate reductase large subunit	21.0883	21.5091	21.1699	21.5876	21.3476	21.3206
	0.167993	-0.0702044	P24534	C9JZW3;P24534	EF1B_HUMAN	EEF1B2	Elongation factor 1-beta	26.3788	26.4307	25.9986	26.4449	26.39	26.1839
	0.856561	-0.446426	P24539	Q5QNZ2;P24539	AT5F1_HUMAN	ATP5PB	ATP synthase F(0) complex subunit B1, mitochondrial	21.2057	21.7489	21.7725	22.2559	21.7257	22.0848
	0.101698	0.0235017	P24752	A0A5F9ZHJ7;A0A5F9ZHJ0;A0A5F9ZHL1;A0A5F9ZI66;A0A5F9ZHD4;P24752	THIL_HUMAN	ACAT1	Acetyl-CoA acetyltransferase, mitochondrial	19.6779	19.8001	19.5135	19.6417	19.6385	19.6408
	0.583305	0.339835	P24821;P24821-4	P24821-4;E9PC84;H0YGZ3;A0A994J7R0;A0A994J7C1;J3QSU6;P24821	TENA_HUMAN	TNC	Tenascin	26.1706	26.0894	26.001	25.2396	26.0475	25.9544
	0.927072	0.156381	P24928	A0A6Q8PGB0;P24928	RPB1_HUMAN	POLR2A	DNA-directed RNA polymerase II subunit RPB1	24.0353	24.1021	24.1096	23.7787	23.9732	24.026
	0.0628258	0.037618	P25054;P25054-2	P25054-2;P25054-3;P25054	APC_HUMAN	APC	Adenomatous polyposis coli protein	20.4469	20.6271	20.487	20.0898	20.6075	20.7508
	0.0931812	0.0311521	P25205	J3KQ69;A0A499FHX9;P25205-2;P25205	MCM3_HUMAN	MCM3	DNA replication licensing factor MCM3	24.1315	24.1891	23.8321	24.0322	24.0901	23.937
	2.61768	0.576794	P25391	P25391	LAMA1_HUMAN	LAMA1	Laminin subunit alpha-1	25.5604	25.5081	25.3853	24.8581	24.8255	25.0399
	0.0971175	-0.0150439	P25398	P25398	RS12_HUMAN	RPS12	Small ribosomal subunit protein eS12	32.6564	32.5483	32.6788	32.7098	32.6411	32.5778
	0.118457	-0.0556628	P25440	H0Y6K2;A0A140T9E9;A0A140T9I1;P25440-2;P25440-3;P25440-4;A0A0G2JK44;A0A0G2JHN8;P25440	BRD2_HUMAN	BRD2	Bromodomain-containing protein 2	26.0787	25.6844	25.5881	25.9947	25.8089	25.7147
	0.345989	-0.0371863	P25490	H0YJU4;H0YJV7;P25490	TYY1_HUMAN	YY1	Transcriptional repressor protein YY1	22.8075	22.9375	22.9382	22.9434	22.9121	22.9392
	2.40825	-0.179492	P25705	P25705-2;K7EK77;K7EJP1;K7ENJ4;K7ERX7;P25705	ATPA_HUMAN	ATP5F1A	ATP synthase subunit alpha, mitochondrial	24.2409	24.243	24.2346	24.4089	24.475	24.3731
	1.03109	0.480817	P25786;P25786-2	F5GX11;P25786-2;B4DEV8;P25786	PSA1_HUMAN	PSMA1	Proteasome subunit alpha type-1	22.9059	22.8311	22.5616	21.9038	22.5191	22.4333
	0.243675	0.194182	P25788;P25788-2	P25788-2;P25788	PSA3_HUMAN	PSMA3	Proteasome subunit alpha type-3	21.275	21.1592	20.8749	21.4003	20.9343	20.392
	0.155552	-0.0487823	P26038	A0A8V8TKR9;P26038	MOES_HUMAN	MSN	Moesin	25.0458	25.1327	24.8886	25.0794	25.2281	24.9059
	1.04282	-0.0734069	P26196	P26196	DDX6_HUMAN	DDX6	Probable ATP-dependent RNA helicase DDX6	26.248	26.2987	26.2529	26.3173	26.3973	26.3054
	0.359092	-0.0372257	P26358-2	P26358-2;P26358-3;A0A7I2YQA8;A0A7I2YQQ0;A0A7I2V311;A0A7I2V490;A0A7I2V5F1;A0A7I2V5F6;A0A7I2V5D0;P26358	DNMT1_HUMAN	DNMT1	Isoform of P26358, Isoform 2 of DNA (cytosine-5)-methyltransferase 1	23.6208	23.7128	23.6044	23.7367	23.6503	23.6626
	0.841487	0.283199	P26368;P26368-2	P26368-2;K7ELP8;P26368	U2AF2_HUMAN	U2AF2	Splicing factor U2AF 65 kDa subunit	30.0537	29.8021	29.6857	29.7688	29.5414	29.3818
	0.854388	0.244007	P26373	J3KS98;H3BUK8;P26373-2;P26373	RL13_HUMAN	RPL13	Large ribosomal subunit protein eL13	33.0882	32.8274	32.8755	32.4791	32.8267	32.7534
	0.277826	0.209341	P26447	P26447	S10A4_HUMAN	S100A4	Protein S100-A4	22.3263	22.7359	21.9992	21.7246	22.2724	22.4363
	0.424399	0.248387	P26583	D6R9A6;P26583	HMGB2_HUMAN	HMGB2	High mobility group protein B2	26.1329	26.3143	25.8162	25.4681	26.1673	25.8828
	0.454922	0.0774644	P26599;P26599-1;P26599-2	A0A0U1RRM4;P26599-1;P26599-2;A6NLN1;A0A0D9SF20;A0A7I2V621;P26599	PTBP1_HUMAN	PTBP1	Polypyrimidine tract-binding protein 1	24.5707	24.356	24.5254	24.3409	24.4285	24.4503
	0.49129	0.267238	P26639	P26639-2;B7ZLP8;A2RTX5-2;P26639;A2RTX5	SYTC_HUMAN	TARS1	Threonine--tRNA ligase 1, cytoplasmic	24.3373	24.0238	23.5353	23.7788	23.6772	23.6387
	0.78064	-0.127446	P26640	A2ABF4;A0A140T954;A0A0G2JJT9;P26640	SYVC_HUMAN	VARS1	Valine--tRNA ligase	28.0808	28.2108	28.2348	28.3583	28.3638	28.1867
	0.580767	0.212619	P26641	P26641-2;P26641	EF1G_HUMAN	EEF1G	Elongation factor 1-gamma	26.7992	26.8663	26.4447	26.5974	26.5791	26.2958
	0.181053	0.0526651	P27105	P27105-2;P27105	STOM_HUMAN	STOM	Stomatin	24.1271	24.2426	24.2022	24.1444	24.3172	23.9523
	1.09626	-0.363019	P27348	E9PG15;P27348	1433T_HUMAN	YWHAQ	14-3-3 protein theta	21.8648	21.4183	21.5941	22.0774	21.817	22.0718
	0.122899	-0.0398191	P27448-8	J3KNR0;H0YNV4;H0YKP9;H0YJI9;H0YIY6;P27448-2;P27448-3;P27448-4;P27448-6;P27448-7;P27448-8;A0A7I2YQF4;A0A7I2YQF7;A0A7I2V2E3;A0A7I2V2N8;A0A7I2V2U9;A0A7I2V3B9;A0A7I2V3I9;A0A7I2V409;A0A7I2V4K8;A0A7I2V4G7;A0A7I2V549;A0A7I2V5G3;A0A7I2V602;A0A7I2V639;P27448	MARK3_HUMAN	MARK3	Isoform of P27448, Isoform 7 of MAP/microtubule affinity-regulating kinase 3	21.9787	21.8459	21.8765	22.1536	21.889	21.7781
	0.178018	-0.0415115	P27635	A6QRI9;F8W7C6;X1WI28;B8A6G2;P27635;Q96L21	RL10_HUMAN	RPL10	Large ribosomal subunit protein uL16	32.316	32.4867	32.6072	32.4585	32.5328	32.5431
	0.291715	0.30835	P27694	P27694	RFA1_HUMAN	RPA1	Replication protein A 70 kDa DNA-binding subunit	22.184	22.1439	22.0515	22.2207	22.267	20.9667
	0.268519	0.18919	P27695	G3V5M0;G3V359;G3V3C7;G3V3M6;P27695	APEX1_HUMAN	APEX1	DNA-(apurinic or apyrimidinic site) endonuclease	24.4727	24.4775	23.7848	24.1238	24.2977	23.7461
	2.64967	-0.417109	P27708	F8VPD4;H7C2E4;P27708	PYR1_HUMAN	CAD	CAD protein	21.6612	21.5317	21.634	22.0778	21.9362	22.0644
	0.049018	-0.0327918	P27797	K7EJB9;A0A7P0T861;K7EL50;P27797	CALR_HUMAN	CALR	Calreticulin	22.0625	22.4891	22.0679	22.2562	22.5436	21.9181
	0.326822	0.0825507	P27816	E7EVA0;P27816-2;P27816-6;A0A804HKE7;P27816	MAP4_HUMAN	MAP4	Microtubule-associated protein 4	24.7935	24.7207	24.5151	24.6998	24.5966	24.4853
	0.535896	0.273287	P27824;P27824-2	D6RAU8;A0A7P0T9L0;A0A7P0T8G1;A0A7P0T8N1;A0A7P0T937;A0A7P0T840;P27824-2;A0A7P0TB65;A0A7P0TAE9;A0A7P0TAN9;A0A7P0TAR9;A0A7P0Z4H2;A0A7P0Z484;A0A7P0Z4D6;P27824	CALX_HUMAN	CANX	Calnexin	22.9034	22.9462	22.6165	22.2122	22.9032	22.5308
	0.606813	0.185131	P28066	P28066-2;P28066	PSA5_HUMAN	PSMA5	Proteasome subunit alpha type-5	22.8504	22.9391	22.7799	22.4706	22.9114	22.6318
	0.212881	0.0520751	P28288	A0A3B3ITW3;P28288-2;P28288	ABCD3_HUMAN	ABCD3	ATP-binding cassette sub-family D member 3	22.5848	22.4346	22.438	22.5595	22.4594	22.2824
	0.141335	-0.0899658	P28289	P28289	TMOD1_HUMAN	TMOD1	Tropomodulin-1	19.0616	19.752	19.5	19.3985	19.772	19.4131
	0.506643	-0.425538	P28331;P28331-2;P28331-3;P28331-4;P28331-5	B4DJ81;P28331-2;P28331-3;P28331-4;P28331-5;P28331	NDUS1_HUMAN	NDUFS1	NADH-ubiquinone oxidoreductase 75 kDa subunit, mitochondrial	19.8655	20.3833	19.9333	21.1438	20.2009	20.1141
	0.600135	0.267294	P28340	A0A2R8Y705;M0R2B7;M0QZR8;A0A087WYJ2;P28340	DPOD1_HUMAN	POLD1	DNA polymerase delta catalytic subunit	21.3672	20.9732	21.0321	20.5602	20.9153	21.0952
	0.544728	0.229891	P28370	B7ZLQ5;A0A0A0MRP6;P28370-2;P28370	SMCA1_HUMAN	SMARCA1	Probable global transcription activator SNF2L1	22.1034	21.8159	22.2216	21.533	21.9775	21.9408
	0.0681877	0.046477	P28715	A0A090HNM7;A0A494C0S2;R4GMW8;A0A1W2PS85;P28715	ERCC5_HUMAN	ERCC5	DNA excision repair protein ERCC-5	20.4362	20.609	20.7228	20.1138	20.8626	20.6522
	0.298044	0.216937	P29083	E9PER7;P29083	T2EA_HUMAN	GTF2E1	General transcription factor IIE subunit 1	21.9847	22.1264	21.6041	21.1864	21.9439	21.9342
	0.0385987	-0.0136528	P29084	P29084	T2EB_HUMAN	GTF2E2	Transcription initiation factor IIE subunit beta	23.2179	23.2125	23.0074	23.3494	23.1078	23.0217
	0.742039	-0.12829	P29372;P29372-2;P29372-4;P29372-5	P29372-2;P29372-4;P29372-5;P29372	3MG_HUMAN	MPG	DNA-3-methyladenine glycosylase	23.2628	23.1763	23.0983	23.3688	23.1804	23.373
	0.197962	0.121973	P29401;P29401-2	P29401-2;P29401	TKT_HUMAN	TKT	Transketolase	21.7162	22.0871	21.3135	21.6869	21.6361	21.4279
	0.382181	0.158904	P29558;P29558-2	E7ETU5;P29558-2;P29558	RBMS1_HUMAN	RBMS1	RNA-binding motif, single-stranded-interacting protein 1	22.4514	22.654	22.1917	22.4926	22.1196	22.2082
	0.0323625	-0.0332883	P29597	H0YE24;H0YCT7;E9PM19;A0A8V8TPJ0;A0A8V8TPX5;A0A8V8TN50;K7EM33;P29597	TYK2_HUMAN	TYK2	Non-receptor tyrosine-protein kinase TYK2	20.3064	20.6629	19.5452	20.006	20.229	20.3793
	0.126231	-0.0209064	P29692	H0YCK7;E9PRY8;E9PPR1;E9PQ49;E9PQZ1;E9PMW7;E9PN91;E9PNW6;E9PL71;P29692-2;P29692-3;P29692-4;E9PIZ1;E9PK01;E9PK06;E9PJD0;E9PK72;E9PKK3;E9PL12;E9PI39;A0A087X1X7;P29692	EF1D_HUMAN	EEF1D	Elongation factor 1-delta	27.2163	27.363	27.1718	27.2458	27.2607	27.3073
	1.05165	-0.370418	P29692-3	E9PN91;E9PL71;P29692-3	EF1D_HUMAN	EEF1D	Isoform of P29692, Isoform 3 of Elongation factor 1-delta	15.7705	16.3288	16.0591	16.4709	16.3494	16.4493
	1.23401	0.375519	P29966	P29966	MARCS_HUMAN	MARCKS	Myristoylated alanine-rich C-kinase substrate	24.8544	24.7634	24.3905	24.2691	24.3261	24.2867
	1.25336	0.0947673	P29992	K7EL62;P29992	GNA11_HUMAN	GNA11	Guanine nucleotide-binding protein subunit alpha-11	23.4589	23.5673	23.4942	23.4262	23.4288	23.3811
	0.0717947	0.0990651	P30040	F8VY02;P30040	ERP29_HUMAN	ERP29	Endoplasmic reticulum resident protein 29	22.2249	21.5104	21.7768	20.9147	21.9012	22.3989
	0.0313425	-0.0330639	P30041	P30041	PRDX6_HUMAN	PRDX6	Peroxiredoxin-6	21.856	22.0648	21.1168	21.683	21.3657	22.088
	0.552006	-0.29556	P30048;P30048-2	P30048-2;P30048	PRDX3_HUMAN	PRDX3	Thioredoxin-dependent peroxide reductase, mitochondrial	20.4393	21.1579	21.0607	21.0501	21.3079	21.1865
	0.842187	0.155284	P30050	P30050	RL12_HUMAN	RPL12	Large ribosomal subunit protein uL11	32.9056	32.8476	32.7561	32.5418	32.7092	32.7924
	0.167761	0.133644	P30086	P30086	PEBP1_HUMAN	PEBP1	Phosphatidylethanolamine-binding protein 1	19.911	20.5592	19.845	20.0699	20.2508	19.5936
	0.0634736	0.0373325	P30101	A0A8I5QKQ5;A0A8I5QJM1;H7BZJ3;A0A8I5KNU9;A0A8I5KPY2;A0A8I5KP58;A0A8I5KRV3;A0A8I5KS72;A0A8I5KT88;A0A8I5KW33;A0A8I5KW00;A0A8I5KYJ6;A0A8I5KXE2;A0A8I5KXC9;P30101	PDIA3_HUMAN	PDIA3	Protein disulfide-isomerase A3	23.3835	23.9509	23.3937	23.4473	23.7017	23.467
	0.294698	0.100786	P30153	C9J9C1;E9PH38;B3KQV6;A0A994J3N8;A0A994J3H1;P30153	2AAA_HUMAN	PPP2R1A	Serine/threonine-protein phosphatase 2A 65 kDa regulatory subunit A alpha isoform	21.798	22.0934	22.016	21.8582	22.058	21.6888
	1.11691	-0.460714	P30154	P30154-4;P30154-5;P30154	2AAB_HUMAN	PPP2R1B	Serine/threonine-protein phosphatase 2A 65 kDa regulatory subunit A beta isoform	22.2485	22.0359	22.6177	22.5901	22.9119	22.7822
	0.346936	-0.155853	P30260;P30260-2	P30260-2;G5EA36;P30260	CDC27_HUMAN	CDC27	Cell division cycle protein 27 homolog	22.9954	23.2325	23.4014	23.1125	23.6123	23.3721
	0.253892	-0.0578149	P30414	P30414	NKTR_HUMAN	NKTR	NK-tumor recognition protein	21.5042	21.492	21.5015	21.3764	21.6517	21.643
	0.653678	0.247718	P30419	P30419-2;Q5VUC6;A0A7I2V3U5;A0A7I2V3X4;A0A7I2V539;P30419;O60551	NMT1_HUMAN	NMT1	Glycylpeptide N-tetradecanoyltransferase 1	25.9205	25.7422	25.5235	25.6683	25.5368	25.2379
	1.48621	0.444279	P30622;P30622-1;P30622-2	J3KP58;P30622-1;P30622-2;F5H6A0;F5H1T5;P30622	CLIP1_HUMAN	CLIP1	CAP-Gly domain-containing linker protein 1	23.2378	23.1944	22.8686	22.5069	22.7184	22.7426
	1.62974	0.23376	P30876	C9J2Y9;C9J4M6;P30876	RPB2_HUMAN	POLR2B	DNA-directed RNA polymerase II subunit RPB2	25.6541	25.7185	25.628	25.366	25.3809	25.5523
	0.197009	-0.126147	P31153	P31153-2;P31153	METK2_HUMAN	MAT2A	S-adenosylmethionine synthase isoform type-2	20.0981	20.3886	20.1199	20.7806	20.1486	20.0558
	0.203859	0.0137831	P31327;P31327-3	P31327-3;P31327	CPSM_HUMAN	CPS1	Carbamoyl-phosphate synthase [ammonia], mitochondrial	23.1448	23.1744	23.1	23.1406	23.1405	23.0967
	0.428875	-0.587966	P31350;P31350-2	P31350-2;A0A286YFD6;P31350	RIR2_HUMAN	RRM2	Ribonucleoside-diphosphate reductase subunit M2	19.4498	18.9646	18.3298	18.6688	20.3594	19.4798
	0.114529	-0.0575364	P31431	P31431-2;P31431	SDC4_HUMAN	SDC4	Syndecan-4	22.7874	23.1838	23.4111	23.1964	23.1709	23.1875
	0.0121318	0.00619888	P31689	P31689	DNJA1_HUMAN	DNAJA1	DnaJ homolog subfamily A member 1	25.0487	25.238	24.9544	25.2691	25.1664	24.7868
	0.40941	0.27215	P31942;P31942-2	P31942-2;P31942-3;P31942-4;P31942	HNRH3_HUMAN	HNRNPH3	Heterogeneous nuclear ribonucleoprotein H3	23.9866	23.1903	23.7926	23.0885	23.5007	23.5637
	0.300748	-0.116369	P31943	G8JLB6;H0YB39;P31943	HNRH1_HUMAN	HNRNPH1	Heterogeneous nuclear ribonucleoprotein H	26.3959	26.3677	26.4758	26.2725	26.5115	26.8046
	0.717595	0.186132	P31946;P31946-2	P31946-2;P31946	1433B_HUMAN	YWHAB	14-3-3 protein beta/alpha	22.5594	22.7657	22.391	22.4648	22.2985	22.3946
	0.709509	-0.159375	P31948;P31948-2	P31948-2;F5GXD8;F5H783;P31948	STIP1_HUMAN	STIP1	Stress-induced-phosphoprotein 1	21.8983	21.9753	21.9174	22.2565	22.1017	21.911
	0.580353	0.496431	P31949	P31949	S10AB_HUMAN	S100A11	Protein S100-A11	21.9997	22.4791	21.6399	20.9558	21.8459	21.8278
	0.335903	0.239495	P32119	P32119	PRDX2_HUMAN	PRDX2	Peroxiredoxin-2	22.7279	22.7774	21.8868	22.243	22.3104	22.1202
	0.655379	0.284001	P32242	G3V3P9;G3V3J3;A0A5F9ZHY1;P32243-2;P32242;P32243	OTX1_HUMAN	OTX1	Homeobox protein OTX1	20.8219	21.0546	20.8503	20.9398	20.3097	20.6252
	1.03448	-0.267946	P32322	P32322-3;E2QRB3;P32322	P5CR1_HUMAN	PYCR1	Pyrroline-5-carboxylate reductase 1, mitochondrial	20.9506	21.2096	20.991	21.4474	21.3655	21.1421
	1.19702	1.00677	P32754;P32754-2	P32754-2;A0A0B4J1R4;P32754	HPPD_HUMAN	HPD	4-hydroxyphenylpyruvate dioxygenase	21.4978	22.0114	21.2611	21.1194	20.6411	19.9894
	0.809181	0.121443	P32780	P32780-2;P32780	TF2H1_HUMAN	GTF2H1	General transcription factor IIH subunit 1	22.3337	22.2497	22.2009	22.164	22.0304	22.2256
	0.0582805	-0.0640475	P32969	D6RAN4;P32969	RL9_HUMAN	RPL9P9	Large ribosomal subunit protein uL6	32.2129	31.8912	32.1448	31.4241	32.394	32.6229
	0.0190717	0.00642904	P33176	P33176	KINH_HUMAN	KIF5B	Kinesin-1 heavy chain	22.9913	23.0525	22.702	22.8496	22.9322	22.9447
	0.0377852	-0.0313269	P33897	P33897	ABCD1_HUMAN	ABCD1	ATP-binding cassette sub-family D member 1	21.5946	20.8746	20.8847	20.9379	21.4377	21.0722
	1.25673	-0.306923	P33981;P33981-2	P33981-2;P33981	TTK_HUMAN	TTK	Dual specificity protein kinase TTK	20.2192	20.2052	20.3801	20.4893	20.4616	20.7744
	0.885305	-0.0809657	P33991	A0A3B3IS57;A0A3B3IT92;A0A3B3IU45;E5RG31;P33991	MCM4_HUMAN	MCM4	DNA replication licensing factor MCM4	29.7092	29.7806	29.7296	29.7774	29.8942	29.7906
	0.276439	-0.0880241	P33992	B1AHB1;B1AHB2;P33992	MCM5_HUMAN	MCM5	DNA replication licensing factor MCM5	24.1477	24.1255	23.8576	24.3066	24.0367	24.0517
	0.602035	-0.160633	P33993	P33993-2;P33993	MCM7_HUMAN	MCM7	DNA replication licensing factor MCM7	24.3721	24.5085	24.6919	24.5638	24.8235	24.6672
	0.616383	0.508399	P34741	E7ESK6;E9PBI9;E5RJB8;E5RHU3;P34741	SDC2_HUMAN	SDC2	Syndecan-2	24.6116	23.8517	23.3411	23.4625	23.4529	23.3638
	0.732095	-0.472271	P34897;P34897-3	H0YIZ0;G3V4W5;G3V2Y4;P34897-2;P34897-3;P34897	GLYM_HUMAN	SHMT2	Serine hydroxymethyltransferase, mitochondrial	21.5518	20.9028	21.4728	21.3821	21.8501	22.112
	1.20637	-0.256347	P34932	P34932	HSP74_HUMAN	HSPA4	Heat shock 70 kDa protein 4	21.2228	21.4525	21.153	21.4492	21.5872	21.5608
	0.0358264	0.0203495	P35052	H7BZL4;H7C410;H7C024;P35052	GPC1_HUMAN	GPC1	Glypican-1	24.0413	24.1951	23.7022	23.8723	23.7984	24.2068
	0.68473	0.116972	P35221;P35221-2	P35221-2;G3XAM7;E5RIB1;E5RJ41;P35221	CTNA1_HUMAN	CTNNA1	Catenin alpha-1	23.3642	23.3615	23.1325	23.1873	23.1466	23.1734
	0.544056	-0.466162	P35222	A0A2R8Y804;A0A2R8Y750;A0A2R8Y6G0;A0A2R8Y5Z1;A0A2R8Y5A3;A0A2R8Y5C3;A0A2R8Y543;A0A2R8YCH5;B4DGU4;P35222	CTNB1_HUMAN	CTNNB1	Catenin beta-1	23.8848	24.2762	23.8886	25.1651	24.3155	23.9675
	0.603214	0.23063	P35226	J3KT13;Q5T8Z4;Q5T8Z6;A0A087X259;R4GMX3;P35227;P35226	BMI1_HUMAN	BMI1	Polycomb complex protein BMI-1	21.2013	21.2378	20.8574	21.0921	20.8357	20.6768
	0.274246	-0.0761312	P35232	E7ESE2;C9JZ20;C9JW96;P35232-2;E9PCW0;P35232	PHB1_HUMAN	PHB1	Prohibitin 1	24.2749	24.1694	23.9576	24.3277	24.1243	24.1783
	0.602244	0.202888	P35237	A0A2R8Y6A7;A0A2R8YD12;A0A024QZX5;A0A087X1N8;P35237	SPB6_HUMAN	SERPINB6	Serpin B6	20.1194	20.3223	19.8695	20.0471	19.8561	19.7993
	0.0519309	-0.0491524	P35240;P35240-2;P35240-3;P35240-4;P35240-5;P35240-6;P35240-8	A0A5K1VW66;P35240-2;P35240-3;P35240-4;P35240-5;P35240-6;P35240-8;P35240	MERL_HUMAN	NF2	Merlin	20.7095	20.2119	20.9282	20.9103	20.9153	20.1715
	0.55032	0.293945	P35241	A0A2R8Y5S7;A0A2R8Y4H6;P35241-4;P35241-5;P35241-2;P35241-3;P35241	RADI_HUMAN	RDX	Radixin	23.1796	22.9252	22.405	22.5483	22.6482	22.4314
	1.29134	-0.144716	P35249	C9JZI1;H7C1P0;P35249-2;P35249	RFC4_HUMAN	RFC4	Replication factor C subunit 4	26.8771	26.9254	26.7677	27.015	26.9546	27.0348
	0.107047	0.04691	P35250	P35250-2;H7C5P4;H7C596;A0A087WVY3;P35250	RFC2_HUMAN	RFC2	Replication factor C subunit 2	25.6003	25.8669	25.8244	25.4673	25.7537	25.93
	1.37887	0.201711	P35251;P35251-2	P35251-2;P35251	RFC1_HUMAN	RFC1	Replication factor C subunit 1	25.9771	25.9041	25.7551	25.6897	25.638	25.7035
	0.780542	0.271983	P35268	K7ERI7;P35268	RL22_HUMAN	RPL22	Large ribosomal subunit protein eL22	33.1641	32.9991	32.9145	32.468	32.9001	32.8937
	0.242794	0.114019	P35269	M0R0R9;M0R0Z3;P35269	T2FA_HUMAN	GTF2F1	General transcription factor IIF subunit 1	25.3932	25.2038	24.8555	25.2289	24.9729	24.9087
	0.108188	0.0893854	P35321	P22528;P35321	SPR1A_HUMAN	SPRR1A	Cornifin-A	21.8659	22.3426	21.7509	21.6493	22.3714	21.6706
	0.375971	0.572565	P35527	K7EQQ3;P35527	K1C9_HUMAN	KRT9	Keratin, type I cytoskeletal 9	30.3496	30.8569	29.0813	29.7004	30.0384	28.8314
	0.240776	0.062369	P35579	P35579-2;A0A8I5KWT8;P35579	MYH9_HUMAN	MYH9	Myosin-9	27.9513	28.0896	27.9974	28.1104	27.9549	27.7859
	0.463717	0.0704606	P35580	M0QY43;Q7Z406-2;Q7Z406-4;Q7Z406-5;Q7Z406-6;A0A8I5KZ38;P35580-2;P35580-3;P35580-4;P35580-5;P35580;Q7Z406	MYH10_HUMAN	MYH10	Myosin-10	25.7464	25.8539	25.7767	25.8301	25.7008	25.6348
	1.66829	-0.347385	P35606;P35606-2	P35606-2;H0YAC7;H0Y938;A0A7I2YQF9;A0A7I2V258;A0A7I2V3G0;P35606	COPB2_HUMAN	COPB2	Coatomer subunit beta'	24.7489	24.6598	24.8704	24.9821	25.1058	25.2333
	0.221142	0.131263	P35610	P35610-2;P35610-3;B1APM4;P35610	SOAT1_HUMAN	SOAT1	Sterol O-acyltransferase 1	23.2382	22.9854	22.6065	22.9514	22.9548	22.5301
	1.15044	0.200754	P35611;P35611-2;P35611-3;P35611-4;P35611-6	E7EV99;H0Y9H2;P35611-2;P35611-3;P35611-4;P35611-5;P35611-6;A0A804HL01;E7ENY0;P35611	ADDA_HUMAN	ADD1	Alpha-adducin	20.4838	20.683	20.6757	20.5047	20.4025	20.3332
	0.0547483	0.0161667	P35613;P35613-2	A0A7P0T8A7;A0A7P0TA85;P35613-2;P35613-3;P35613-4;A0A7P0TB04;R4GMX5;R4GN83;I3L192;A0A087WUV8;P35613	BASI_HUMAN	BSG	Basigin	22.6261	22.9133	22.8289	22.8332	22.8247	22.6619
	0.470507	0.307746	P35637;P35637-2	H3BPE7;P35637-2;P35637	FUS_HUMAN	FUS	RNA-binding protein FUS	32.3129	31.7214	31.3906	31.6539	31.4935	31.3542
	0.735927	0.49222	P35658;P35658-2	P35658-2;P35658-3;P35658-4;P35658-5;A0A494C1F2;A0A8Q3WLX1;A0A8Q3SHZ4;P35658	NU214_HUMAN	NUP214	Nuclear pore complex protein Nup214	21.2343	21.3474	21.8369	21.0223	20.5378	21.3819
	0.17533	0.0854009	P35659	P35659-2;H0Y993;B4DFG0;A0A494C028;A0A494C198;P35659	DEK_HUMAN	DEK	Protein DEK	26.8539	26.8512	26.3325	26.7053	26.5916	26.4846
	0.352679	0.113402	P35869	A0A2R8Y7G1;A0A1B0GVI7;P35869	AHR_HUMAN	AHR	Aryl hydrocarbon receptor	20.9709	20.5589	20.5821	20.5933	20.5864	20.5919
	0.907847	1.11451	P35908	P35908	K22E_HUMAN	KRT2	Keratin, type II cytoskeletal 2 epidermal	29.5046	30.0942	28.6085	27.9809	29.0368	27.8461
	1.44733	0.32806	P35998	C9JX88;C9JLS9;P35998	PRS7_HUMAN	PSMC2	26S proteasome regulatory subunit 7	22.8847	22.7074	22.6461	22.4883	22.5021	22.2637
	0.0995196	0.0251821	P36542	P36542-2;P36542	ATPG_HUMAN	ATP5F1C	ATP synthase subunit gamma, mitochondrial	24.2163	23.9915	23.93	23.9805	24.0691	24.0127
	0.469282	0.0810636	P36578	H3BTP7;H3BM89;P36578	RL4_HUMAN	RPL4	Large ribosomal subunit protein uL4	33.2949	33.1476	33.1107	33.0215	33.0967	33.1918
	0.0285012	0.00842094	P36776;P36776-2	P36776-2;P36776-3;K7EJE8;K7EKE6;K7ER27;P36776	LONM_HUMAN	LONP1	Lon protease homolog, mitochondrial	23.4549	23.5586	23.4302	23.5106	23.6084	23.2994
	0.117592	-0.0548153	P36873;P36873-2	P36873-2;F8VYE8;F8VR82;F8W0W8;A0A087WYY5;P36873	PP1G_HUMAN	PPP1CC	Serine/threonine-protein phosphatase PP1-gamma catalytic subunit	22.858	22.4223	22.8317	22.7706	22.59	22.9158
	0.521309	0.291141	P36894	P36894	BMR1A_HUMAN	BMPR1A	Bone morphogenetic protein receptor type-1A	18.8793	19.0666	18.466	18.2629	18.4394	18.8361
	0.523174	0.0865682	P36915	A0A140T8Y2;P36915-2;P36915	GNL1_HUMAN	GNL1	Guanine nucleotide-binding protein-like 1	25.2513	25.1472	25.2746	25.2224	25.1722	25.0187
	0.133215	0.0653922	P36954	K7EK49;K7EKS1;P36954	RPB9_HUMAN	POLR2I	DNA-directed RNA polymerase II subunit RPB9	22.726	22.7451	22.8618	23.0629	22.5163	22.5575
	0.718901	0.154977	P36957	Q86SW4;P36957-2;P36957	ODO2_HUMAN	DLST	Dihydrolipoyllysine-residue succinyltransferase component of 2-oxoglutarate dehydrogenase complex, mitochondrial	21.3576	21.5758	21.482	21.4647	21.2706	21.2151
	0.0614732	0.0173009	P37108	H0YLA2;P37108	SRP14_HUMAN	SRP14	Signal recognition particle 14 kDa protein	28.1643	28.2947	28.0822	28.0147	28.2125	28.2621
	0.00062659	0.00055186	P37198	P37198	NUP62_HUMAN	NUP62	Nuclear pore glycoprotein p62	19.908	19.9979	20.0477	19.4436	20.1017	20.4066
	0.515847	0.186186	P37268	P37268-2;P37268-3;P37268-4;A0A1W2PQ47;E9PS69;E9PNM1;E9PJG4;P37268	FDFT_HUMAN	FDFT1	Squalene synthase	20.3889	20.7929	20.4124	20.4364	20.4322	20.1671
	0.745924	0.384591	P37802;P37802-2	P37802-2;X6RJP6;P37802	TAGL2_HUMAN	TAGLN2	Transgelin-2	21.943	21.8999	21.3817	21.138	21.6523	21.2806
	0.307728	0.175383	P38159	H3BUY5;P38159-2;P38159;Q96E39	RBMX_HUMAN	RBMX	RNA-binding motif protein, X chromosome	28.8746	28.3495	28.2364	28.5582	28.2064	28.1697
	0.516415	0.162235	P38432	P38432	COIL_HUMAN	COIL	Coilin	24.2066	23.8681	23.7543	23.7683	23.7479	23.8261
	0.0804236	-0.0735448	P38435	A0A8I5QKY1;A0A8I5QJS0;P38435-2;A0A8I5KXY4;A0A8I5KXJ8;P38435	VKGC_HUMAN	GGCX	Vitamin K-dependent gamma-carboxylase	22.2113	21.5013	21.2905	21.8767	21.9307	21.4163
	0.77251	-0.379119	P38606;P38606-2	P38606-2;A0A994J738;P38606	VATA_HUMAN	ATP6V1A	V-type proton ATPase catalytic subunit A	19.2643	19.6498	18.9768	19.695	19.4692	19.8641
	0.432875	-0.0851377	P38646	D6RCD7;H0Y8K0;A0A3B3ITI4;A0A7I2YQB2;A0A7I2V2G2;A0A7I2V2S7;A0A7I2V3F7;P38646	GRP75_HUMAN	HSPA9	Stress-70 protein, mitochondrial	24.4932	24.5909	24.6834	24.5468	24.7339	24.7423
	1.09648	-0.179688	P38919	I3L3H2;P38919	IF4A3_HUMAN	EIF4A3	Eukaryotic initiation factor 4A-III	27.4833	27.6181	27.6633	27.8411	27.6604	27.8023
	0.468872	-0.0953668	P38935	A0A6Q8PFP3;A0A6Q8PGT6;A0A6Q8PGX2;A0A6Q8PF00;F5GX64;P38935	SMBP2_HUMAN	IGHMBP2	DNA-binding protein SMUBP-2	24.7349	24.7919	24.9894	24.8526	24.9539	24.9958
	0.129852	0.0269051	P39019	M0R140;M0R2L9;M0QYF7;P39019	RS19_HUMAN	RPS19	Small ribosomal subunit protein eS19	33.1059	32.9222	32.9112	32.868	32.9967	32.9939
	0.90172	0.228293	P39023	B5MCW2;H7C3M2;H7C422;G5E9G0;P39023	RL3_HUMAN	RPL3	Large ribosomal subunit protein uL3	32.8807	32.7925	32.7062	32.3608	32.6118	32.7218
	0.0243528	0.0101376	P39656;P39656-3	P39656-2;P39656-3;A0A0C4DGS1;P39656	OST48_HUMAN	DDOST	Dolichyl-diphosphooligosaccharide--protein glycosyltransferase 48 kDa subunit	21.9747	21.7125	21.7831	21.6818	21.7153	22.0428
	1.24037	-0.670565	P39687	H0YN26;P39687;O43423	AN32A_HUMAN	ANP32A	Acidic leucine-rich nuclear phosphoprotein 32 family member A	21.0075	21.3947	21.2943	21.4574	22.0601	22.1906
	0.00362038	0.00199509	P39748	I3L3E9;P39748-2;P39748	FEN1_HUMAN	FEN1	Flap endonuclease 1	25.1162	25.2034	24.7493	24.9601	25.2428	24.86
	0.74468	0.0896918	P40222	P40222	TXLNA_HUMAN	TXLNA	Alpha-taxilin	24.6373	24.7135	24.535	24.5032	24.5429	24.5706
	0.394739	0.0534827	P40227	P40227-2;P40227	TCPZ_HUMAN	CCT6A	T-complex protein 1 subunit zeta	24.2076	24.234	24.1222	24.193	24.1672	24.0432
	0.128695	-0.0316366	P40429	Q8J015;M0QYS1;A0A7I2V2L9;A0A7I2V5L3;Q6NVV1;P40429	RL13A_HUMAN	RPL13A	Large ribosomal subunit protein uL13	32.6598	32.7416	32.8555	32.6489	32.8842	32.8188
	0.0252057	0.0216338	P40692	E7EUC9;P40692-2;P40692-3;H0Y818;A0A669KBK2;A0A669KBB4;A0A669KAW3;A0A087WX20;P40692	MLH1_HUMAN	MLH1	DNA mismatch repair protein Mlh1	22.9048	22.5579	22.0173	22.4377	22.7053	22.272
	0.858608	-0.251695	P40763;P40763-3	G8JLH9;P40763-3;A0A7I2YQR5;A0A7I2V444;A0A7I2V3V0;A0A7I2V4C8;A0A7I2V4R2;A0A7I2V5N9;P40763	STAT3_HUMAN	STAT3	Signal transducer and activator of transcription 3	20.331	20.4559	20.4639	20.9252	20.5686	20.5121
	0.396104	-0.457197	P40818	A0A075B720;P40818-2;P40818	UBP8_HUMAN	USP8	Ubiquitin carboxyl-terminal hydrolase 8	21.2237	21.2078	20.5375	20.8517	22.2874	21.2014
	1.00258	-0.459361	P40926	G3XAL0;P40926-2;P40926	MDHM_HUMAN	MDH2	Malate dehydrogenase, mitochondrial	19.5933	19.6748	19.3238	20.0166	20.2997	19.6537
	0.0553734	0.0153459	P40937	C9JH72;P40937-2;F5H304;F5H0U6;P40937	RFC5_HUMAN	RFC5	Replication factor C subunit 5	25.2895	25.2603	25.5071	25.2827	25.2802	25.4481
	0.198979	0.0215041	P40938	P40938-2;P40938	RFC3_HUMAN	RFC3	Replication factor C subunit 3	25.0507	24.97	24.9108	24.9741	24.9434	24.9495
	0.135041	0.0254135	P40939	A0A2R8Y4F5;H0YFD6;P40939	ECHA_HUMAN	HADHA	Trifunctional enzyme subunit alpha, mitochondrial	22.5847	22.5618	22.426	22.4043	22.5261	22.5659
	1.02695	-0.111446	P41091	Q2VIR3-2;Q2VIR3;P41091	IF2G_HUMAN	EIF2S3	Eukaryotic translation initiation factor 2 subunit 3	27.0967	27.2446	27.1759	27.263	27.3389	27.2497
	0.79362	-0.408927	P41208	P41208	CETN2_HUMAN	CETN2	Centrin-2	22.5752	22.9684	23.0795	23.6384	23.0344	23.177
	0.603823	-0.198123	P41214	Q5SY38;P41214	EIF2D_HUMAN	EIF2D	Eukaryotic translation initiation factor 2D	25.4493	25.5333	25.0968	25.6198	25.6181	25.4359
	0.473386	0.227965	P41221;P41221-2	P41221-2;P41221	WNT5A_HUMAN	WNT5A	Protein Wnt-5a	24.9839	25.0326	24.4362	24.6842	24.6622	24.4224
	0.238997	-0.121002	P41223	P41223-2;P41223	BUD31_HUMAN	BUD31	Protein BUD31 homolog	22.0107	22.3132	22.4005	22.2915	22.6694	22.1265
	0.0113565	0.00548299	P41227	A8MWP7;C9JW55;F8W808;C9JN83;P41227-2;P41227	NAA10_HUMAN	NAA10	N-alpha-acetyltransferase 10	24.0308	23.9557	23.8773	24.2209	23.9351	23.6914
	0.37688	0.214497	P41250;P41250-2	A0A6Q8PFV5;A0A6Q8PFZ6;A0A6Q8PGI6;A0A6Q8PGN7;A0A6Q8PGA8;P41250-2;A0A6Q8PGZ8;A0A6Q8PGZ9;A0A6Q8PGW4;A0A6Q8PH49;A0A6Q8PF45;A0A6Q8PHH9;A0A6Q8PHI7;F8WCK4;H7C443;P41250	GARS_HUMAN	GARS1	Glycine--tRNA ligase	21.527	21.0629	20.8095	21.1029	20.9417	20.7114
	0.0175106	0.00382169	P41252	J3KR24;A0A804HHW9;A0A804HJ36;A0A804HIV9;A0A804HIG2;A0A0A0MSX9;A0A804HK69;A0A804HJN6;A0A804HKU1;A0A804HL54;P41252	SYIC_HUMAN	IARS1	Isoleucine--tRNA ligase, cytoplasmic	24.9141	25.0236	24.8687	25.0275	24.934	24.8334
	0.831735	0.128854	P41567	K7EM18;O60739;P41567	EIF1_HUMAN	EIF1	Eukaryotic translation initiation factor 1	24.0923	23.9958	24.0048	24.0075	23.7837	23.9152
	0.072569	0.0697886	P41743	P41743	KPCI_HUMAN	PRKCI	Protein kinase C iota type	19.7794	19.2889	19.5519	19.13	19.2	20.0807
	0.0519872	-0.017917	P42166	H0YJH7;P42167-2;P42167-3;G5E972;P42167;P42166	LAP2A_HUMAN	TMPO	Lamina-associated polypeptide 2, isoform alpha	25.6871	25.6542	25.398	25.7233	25.6075	25.4623
	0.407972	-0.137463	P42167	H0YJH7;P42167-2;G5E972;P42167	LAP2B_HUMAN	TMPO	Isoform of P42166, Lamina-associated polypeptide 2, isoforms beta/gamma	24.4987	24.3721	24.2983	24.7841	24.4382	24.3591
	0.926218	-0.111044	P42285	P42285	MTREX_HUMAN	MTREX	Exosome RNA helicase MTR4	23.4367	23.4895	23.5199	23.4934	23.6567	23.6291
	0.661212	-0.322964	P42345	A0A8V8TRG9;A0A8V8TQM6;A0A8V8TQ52;P42345	MTOR_HUMAN	MTOR	Serine/threonine-protein kinase mTOR	22.2022	21.8618	21.4603	22.1532	22.0758	22.2643
	0.108021	0.0386937	P42356	P42356	PI4KA_HUMAN	PI4KA	Phosphatidylinositol 4-kinase alpha	22.8225	22.7216	22.7075	22.8112	22.8593	22.4649
	0.014887	-0.00914065	P42568	P42568-2;P42568	AF9_HUMAN	MLLT3	Protein AF-9	22.4382	22.2785	22.796	22.7779	22.418	22.3443
	1.06984	0.136495	P42677	H0YMV8;C9JLI6;P42677;Q71UM5	RS27_HUMAN	RPS27	Small ribosomal subunit protein eS27	32.3635	32.3544	32.4141	32.1268	32.2977	32.298
	0.0207856	-0.0237872	P42679	K7EQY5;P42679-2;P42679-3;P42679	MATK_HUMAN	MATK	Megakaryocyte-associated tyrosine-protein kinase	19.7146	19.813	18.6811	19.6468	19.4002	19.233
	0.497246	0.281251	P42680	P42680	TEC_HUMAN	TEC	Tyrosine-protein kinase Tec	17.9938	17.806	17.785	17.105	17.8042	17.8318
	0.955422	0.19303	P42694	A0A075B6R3;P42694-2;J3QS41;P42694	HELZ_HUMAN	HELZ	Probable helicase with zinc finger domain	23.7902	23.6204	23.4941	23.4152	23.3903	23.5202
	1.78757	0.135192	P42695	G3V1A9;E9PLE0;A0A8I5KT00;P42695	CNDD3_HUMAN	NCAPD3	Condensin-2 complex subunit D3	21.767	21.7384	21.7424	21.6366	21.5497	21.6561
	0.593951	0.1446	P42696	A2A2V2;P42696	RBM34_HUMAN	RBM34	RNA-binding protein 34	24.6367	24.5999	24.5396	24.4342	24.2724	24.6358
	0.169897	-0.0331192	P42704	A0A804HI14;A0A804HHY9;A0A804HIN4;A0A804HIG4;A0A804HLG8;A0A804HK30;A0A804HJZ1;A0A804HL40;A0A804HKR3;A0A804HKI2;A0A804HKJ0;P42704	LPPRC_HUMAN	LRPPRC	Leucine-rich PPR motif-containing protein, mitochondrial	22.6502	22.4515	22.4347	22.5854	22.5515	22.4988
	0.751393	0.145704	P42766	F2Z388;P42766	RL35_HUMAN	RPL35	Large ribosomal subunit protein uL29	33.065	33.0778	33.1965	32.8315	33.1039	32.9668
	0.0125671	-0.00960668	P43003;P43003-2	P43003-2;A0A7P0TAG7;A0A087X0U3;A0A087WT87;P43003	EAA1_HUMAN	SLC1A3	Excitatory amino acid transporter 1	21.7687	21.0587	21.0472	21.1404	21.4153	21.3478
	0.726971	0.247946	P43121	P43121-2;P43121	MUC18_HUMAN	MCAM	Cell surface glycoprotein MUC18	21.7679	22.0138	21.6765	21.3328	21.6882	21.6934
	0.667943	0.166686	P43243	A8MXP9;A0A0R4J2E8;D6REM6;D6RIA2;D6RBI2;D6RBK5;P43243-2;D6RE02;D6R991;H0Y8T4;B3KM87;P43243	MATR3_HUMAN	MATR3	Matrin-3	26.3094	26.2358	25.9649	25.9177	26.0455	26.0471
	1.0471	0.089489	P43246	A0A2R8Y7S8;A0A2R8Y6P0;A0A2R8YG02;A0A2R8YFH0;E9PHA6;P43246	MSH2_HUMAN	MSH2	DNA mismatch repair protein Msh2	23.0611	23.0079	23.0118	22.9242	22.8823	23.0059
	0.199416	-0.142869	P43307	P43307-2;C9JBX5;A0A3B3IRT8;P43307	SSRA_HUMAN	SSR1	Translocon-associated protein subunit alpha	23.5754	23.5382	23.2378	23.9726	23.1103	23.6971
	0.0318618	-0.0268459	P43353;P43353-2	P43353-2;A0A087X2D4;P43353	AL3B1_HUMAN	ALDH3B1	Aldehyde dehydrogenase family 3 member B1	20.8814	20.1941	20.167	20.5601	20.6414	20.1214
	0.522888	0.344105	P43686	P43686-2;P43686	PRS6B_HUMAN	PSMC4	26S proteasome regulatory subunit 6B	21.0965	21.4207	21.345	21.1938	21.2366	20.3995
	0.541023	-0.118501	P45880	P45880-1;P45880-2;A0A0A0MR02;P45880	VDAC2_HUMAN	VDAC2	Voltage-dependent anion-selective channel protein 2	21.7077	21.6796	21.8533	21.8557	22.0092	21.7313
	0.705819	0.137781	P45973	P45973	CBX5_HUMAN	CBX5	Chromobox protein homolog 5	23.5663	23.3753	23.4311	23.2747	23.4548	23.2298
	2.48024	0.17647	P46013	P46013	KI67_HUMAN	MKI67	Proliferation marker protein Ki-67	24.5909	24.587	24.5087	24.3998	24.3697	24.3877
	0.518726	0.228838	P46060	P46060	RAGP1_HUMAN	RANGAP1	Ran GTPase-activating protein 1	21.0322	21.2401	20.7145	20.5288	20.8894	20.8821
	1.31529	-0.202107	P46063	P46063	RECQ1_HUMAN	RECQL	ATP-dependent DNA helicase Q1	22.7667	22.782	22.755	22.9979	22.8345	23.0776
	1.10432	0.149255	P46087;P46087-4	P46087-2;P46087-3;P46087-4;P46087	NOP2_HUMAN	NOP2	Probable 28S rRNA (cytosine(4447)-C(5))-methyltransferase	26.8716	26.8142	26.7452	26.5622	26.6825	26.7385
	0.0870168	0.0107288	P46100	P46100-2;P46100-3;P46100-4;P46100-5;A0A6Q8PHA4;P46100	ATRX_HUMAN	ATRX	Transcriptional regulator ATRX	23.5615	23.5268	23.488	23.4549	23.5032	23.586
	1.39681	0.226134	P46776	E9PLL6;P46776	RL27A_HUMAN	RPL27A	Large ribosomal subunit protein uL15	33.1706	33.1174	33.0416	32.756	32.973	32.9222
	0.312913	0.0898323	P46777	A0A2R8Y6J3;P46777	RL5_HUMAN	RPL5	Large ribosomal subunit protein uL18	32.8357	32.9509	33.0362	32.65	32.9232	32.9801
	0.324795	-0.0655568	P46778	G3V1B3;M0R181;M0R3I5;P46778	RL21_HUMAN	RPL21	Large ribosomal subunit protein eL21	32.7413	32.9166	33.0029	32.9217	33.0143	32.9215
	0.681506	0.150948	P46779	P46779-2;P46779-3;P46779-4;P46779-5;H0YLP6;H0YMF4;H0YKD8;P46779	RL28_HUMAN	RPL28	Large ribosomal subunit protein eL28	32.9656	32.9483	32.9159	32.5942	32.8732	32.9096
	0.32304	-0.0400658	P46781	A8MXK4;C9JM19;B5MCT8;F2Z3C0;P46781	RS9_HUMAN	RPS9	Small ribosomal subunit protein uS4	32.7769	32.6193	32.7473	32.7226	32.769	32.772
	0.735383	-0.239838	P46782	M0R0R2;M0R0F0;P46782	RS5_HUMAN	RPS5	Small ribosomal subunit protein uS7	31.6857	31.8497	32.0764	31.9165	32.226	32.1889
	0.602625	-0.151529	P46783	A0A2R8Y7H1;A0A2R8YFH6;F6U211;S4R435;A0A1W2PQS6;P46783	RS10_HUMAN	RPS10	Small ribosomal subunit protein eS10	32.7397	33.056	32.9352	33.1886	33.0212	32.9756
	0.165822	0.0496311	P46940	H0YLE8;P46940	IQGA1_HUMAN	IQGAP1	Ras GTPase-activating-like protein IQGAP1	25.6192	25.595	25.3054	25.5311	25.4793	25.3603
	1.32072	0.244528	P46977	P46977-2;P46977	STT3A_HUMAN	STT3A	Dolichyl-diphosphooligosaccharide--protein glycosyltransferase subunit STT3A	23.1151	22.9972	22.9157	22.6362	22.8199	22.8384
	0.456442	0.139406	P47755	P47755-2;C9JUG7;F8W9N7;P47755	CAZA2_HUMAN	CAPZA2	F-actin-capping protein subunit alpha-2	24.7621	24.959	24.9992	24.9329	24.8086	24.5605
	0.358233	-0.0770575	P47756	P47756-1;A0A6I8PRV6;B1AK85;B1AK87;B1AK88;P47756	CAPZB_HUMAN	CAPZB	F-actin-capping protein subunit beta	26.7321	26.9294	26.8614	27.0428	26.9043	26.807
	0.192589	0.162046	P47813	A6NJH9;X6RAC9;O14602;P47813	IF1AX_HUMAN	EIF1AX	Eukaryotic translation initiation factor 1A, X-chromosomal	28.9093	28.2882	27.799	28.2105	28.1137	28.1861
	1.91879	-0.219697	P47897	C9J165;A0A0U1RQM8;A0A0U1RQT0;A0A0U1RQE9;A0A0U1RRI9;A0A1B0GVU9;P47897-2;P47897	SYQ_HUMAN	QARS1	Glutamine--tRNA ligase	23.6741	23.7286	23.7179	24.0216	23.8816	23.8765
	0.114737	0.0365715	P47914	C9IYI4;F8WF43;A0A3B3ITT5;P47914	RL29_HUMAN	RPL29	Large ribosomal subunit protein eL29	32.5164	32.6229	32.7103	32.7501	32.3997	32.59
	0.134645	0.0446587	P48047	P48047	ATPO_HUMAN	ATP5PO	ATP synthase subunit O, mitochondrial	21.6308	21.5482	21.6317	21.796	21.46	21.4207
	0.74751	0.398985	P48059-2	P48059-2;P48059-3;P48059-4;P48059-5;A0A0J9YXC7;A0A0M3HER1;A0A8Q3WLX8;A0A8Q3WLN4;A0A8Q3WKI3;A0A8Q3WKJ2;A0A8Q3WKK6;A0A8Q3WKP0;P48059	LIMS1_HUMAN	LIMS1	Isoform of P48059, Isoform 2 of LIM and senescent cell antigen-like-containing domain protein 1	21.7631	21.9986	21.6314	21.0843	21.8232	21.2886
	1.06034	0.364632	P48444	P48444-2;B0YIW6;P48444	COPD_HUMAN	ARCN1	Coatomer subunit delta	22.9279	22.6861	22.773	22.1627	22.6618	22.4686
	0.429807	0.159075	P48634	P48634-2;P48634-3;P48634-4;P48634	PRC2A_HUMAN	PRRC2A	Protein PRRC2A	27.2854	26.9795	26.7905	26.9893	26.8057	26.7832
	0.0611232	-0.0216395	P48643	P48643-2;E9PCA1;B7ZAR1;E7ENZ3;P48643	TCPE_HUMAN	CCT5	T-complex protein 1 subunit epsilon	23.3003	23.2638	23.4455	23.5627	23.3239	23.1878
	0.153792	-0.0901635	P48651	P48651-2;P48651-3;P48651	PTSS1_HUMAN	PTDSS1	Phosphatidylserine synthase 1	23.0633	22.6315	22.9209	22.7121	22.8663	23.3078
	0.941309	-0.277026	P48729	E7ETM0;P48729-2;P48729-3;D6REM4;H0Y9X2;A0A590UJ43;A0A5F9W493;U3KPX3;U3KQK7;P48729;Q8N752	KC1A_HUMAN	CSNK1A1	Casein kinase I isoform alpha	23.6901	23.6951	23.7141	24.2195	23.9672	23.7436
	0.233035	-0.13726	P48730;P48730-2	B4DLF1;P48730-2;H7BYT1;P48730	KC1D_HUMAN	CSNK1D	Casein kinase I isoform delta	22.4064	22.0606	21.7064	22.3796	22.2141	21.9915
	0.36339	0.252523	P48960;P48960-2;P48960-3	P48960-2;P48960-3;P48960	AGRE5_HUMAN	ADGRE5	Adhesion G protein-coupled receptor E5	22.3563	21.9191	21.7099	22.179	21.4969	21.5518
	1.05803	-0.442628	P48995;P48995-2	A0A8V8TLK5;P48995-2;P48995	TRPC1_HUMAN	TRPC1	Short transient receptor potential channel 1	25.0266	25.4461	25.3034	25.9926	25.4731	25.6383
	0.114751	0.0697295	P49005	C9IZD2;C9JLE1;H7C1B3;A0A8V8TPA1;A0A8V8TPA6;A0A8V8TPB6;A0A8V8TNY7;A0A8V8TMJ0;A0A8V8TMJ5;A0A8V8TMK0;A0A8V8TN07;A0A087WWF6;P49005	DPOD2_HUMAN	POLD2	DNA polymerase delta subunit 2	22.2729	22.3402	22.2623	21.801	22.5388	22.3264
	0.53913	0.253913	P49006	P49006	MRP_HUMAN	MARCKSL1	MARCKS-related protein	22.8677	22.5761	22.2439	22.1326	22.4914	22.302
	0.656712	0.428459	P49184	P49184	DNSL1_HUMAN	DNASE1L1	Deoxyribonuclease-1-like 1	21.0863	21.5875	21.3506	21.1667	21.1742	20.3982
	0.775134	0.0709	P49207	P49207	RL34_HUMAN	RPL34	Large ribosomal subunit protein eL34	32.3462	32.2676	32.2883	32.1841	32.2069	32.2985
	1.18471	-0.458914	P49257	P49257	LMAN1_HUMAN	LMAN1	Protein ERGIC-53	20.1468	19.8402	20.3062	20.6913	20.3167	20.662
	0.101047	0.0188554	P49327	A0A0U1RQF0;P49327	FAS_HUMAN	FASN	Fatty acid synthase	24.9134	25.0815	24.9816	24.8834	25.0018	25.0347
	0.211825	0.0793699	P49368	B4DUR8;P49368-2;Q5SZW8;Q5SZX6;E9PRC8;E9PQ35;P49368	TCPG_HUMAN	CCT3	T-complex protein 1 subunit gamma	23.8443	23.8977	23.593	23.7762	23.8403	23.4803
	0.868959	-0.227425	P49406	A0A0A0MRF4;S4R3W9;P49406	RM19_HUMAN	MRPL19	Large ribosomal subunit protein bL19m	21.6987	21.6119	21.5294	21.6297	21.8838	22.0088
	0.443975	0.148717	P49411	P49411	EFTU_HUMAN	TUFM	Elongation factor Tu, mitochondrial	21.2118	21.1864	20.8761	20.7599	21.0798	20.9885
	0.585503	-0.133615	P49458	Q6P2S0;P49458-2;Q659G3;E9PE20;P49458	SRP09_HUMAN	SRP9	Signal recognition particle 9 kDa protein	28.1966	28.1149	28.0141	28.4161	28.148	28.1624
	0.104214	-0.0613321	P49585	C9J2E1;C9J050;C9JEJ2;H7BZN1;H7C1T3;P49585	PCY1A_HUMAN	PCYT1A	Choline-phosphate cytidylyltransferase A	24.0175	23.8816	23.5094	24.1596	23.7252	23.7076
	0.00792316	-0.00456238	P49588;P49588-2	A0A6Q8PFK3;A0A6Q8PFY2;A0A6Q8PG28;A0A6Q8PGN5;A0A6Q8PGE8;A0A6Q8PGR9;A0A6Q8PH44;A0A6Q8PF77;A0A6Q8PF33;A0A6Q8PHP3;A0A6Q8PHP7;A0A6Q8PHJ2;H3BPK7;P49588-2;P49588	SYAC_HUMAN	AARS1	Alanine--tRNA ligase, cytoplasmic	21.6242	22.1313	22.0034	21.7749	22.1444	21.8534
	0.884796	-0.439263	P49589-3	B4DKY1;P49589-2;P49589-3;P49589	SYCC_HUMAN	CARS1	Isoform of P49589, Isoform 3 of Cysteine--tRNA ligase, cytoplasmic	20.6156	20.0773	20.1969	21.0121	20.7506	20.4448
	0.147286	-0.0835813	P49590;P49590-2	A0A2R8Y6I1;A0A2R8Y3N3;A0A2R8Y5P7;A0A2R8Y5E8;A0A2R8Y4X6;A0A6Q8PFF2;A0A6Q8PFG9;A0A6Q8PFN6;A0A6Q8PHA5;E7ETE2;A0A6Q8PF07;A0A6Q8PF47;D6RJE6;P12081-2;P12081-3;P12081-4;P49590-2;P12081;P49590	SYHM_HUMAN	HARS2	Histidine--tRNA ligase, mitochondrial	22.167	21.9867	21.6091	22.1952	22.0685	21.7499
	0.377309	0.217436	P49591	Q5T5C7;P49591	SYSC_HUMAN	SARS1	Serine--tRNA ligase, cytoplasmic	21.791	21.7504	21.147	21.5867	21.2662	21.1831
	1.17578	0.718993	P49642	F8VSB2;F8VNY2;A0A5F9ZHB6;P49642	PRI1_HUMAN	PRIM1	DNA primase small subunit	22.1347	21.6282	22.0847	21.6937	21.093	20.9039
	0.238459	0.0452957	P49643	A0A5F9ZHU7;P49643	PRI2_HUMAN	PRIM2	DNA primase large subunit	22.0838	22.2174	22.1296	21.9709	22.1609	22.1631
	0.357219	-0.128443	P49674	B0QY34;B0QY35;B0QY36;H0Y645;P48730-2;H0Y2N6;H7BYT1;A0A669KBC0;J3QQI9;P49674;P48730	KC1E_HUMAN	CSNK1E	Casein kinase I isoform epsilon	22.7727	22.5274	22.3961	22.8896	22.6405	22.5515
	0.0590556	-0.0306924	P49711	A0A2R8Y595;A0A2R8YFL0;P49711-2;P49711	CTCF_HUMAN	CTCF	Transcriptional repressor CTCF	24.4703	24.2907	24.5697	24.1623	24.5657	24.6948
	0.481077	0.345983	P49720	A0A087WY10;A0A087WXQ8;P49720	PSB3_HUMAN	PSMB3	Proteasome subunit beta type-3	20.861	21.2163	20.2942	20.4249	20.7307	20.178
	0.490432	0.452809	P49721	A0A087WVV1;P49721	PSB2_HUMAN	PSMB2	Proteasome subunit beta type-2	22.3406	22.1161	21.4815	22.1056	21.4252	21.0489
	1.70723	-0.243664	P49736	H0Y8E6;P49736	MCM2_HUMAN	MCM2	DNA replication licensing factor MCM2	25.1261	25.2364	25.3154	25.4414	25.4299	25.5376
	0.193863	-0.248128	P49748;P49748-3	P49748-2;P49748-3;P49748	ACADV_HUMAN	ACADVL	Very long-chain specific acyl-CoA dehydrogenase, mitochondrial	21.3468	21.2849	20.312	21.0096	20.7473	21.9312
	0.331203	0.118142	P49750	P49750-1;F8VU51;P49750	YLPM1_HUMAN	YLPM1	YLP motif-containing protein 1	23.5495	23.3397	23.1564	23.0969	23.1845	23.4098
	0.246759	0.0886434	P49755	P49755	TMEDA_HUMAN	TMED10	Transmembrane emp24 domain-containing protein 10	21.3872	21.5798	21.6036	21.1992	21.6221	21.4833
	0.232039	0.0655435	P49756	P49756-2;P49756-3;H0YE46;P49756	RBM25_HUMAN	RBM25	RNA-binding protein 25	25.9759	25.7258	25.7395	25.8966	25.6505	25.6974
	1.42953	0.23425	P49757;P49757-3	G3V4S6;G3V3R1;G3V433;P49757-2;P49757-3;P49757-4;P49757-5;P49757-6;P49757-7;P49757-8;P49757	NUMB_HUMAN	NUMB	Protein numb homolog	22.1018	21.9818	21.8759	21.684	21.8206	21.7523
	0.532317	0.296498	P49759;P49759-3	F8WBF5;P49759-3;Q9HAZ1;P49759	CLK1_HUMAN	CLK1	Dual specificity protein kinase CLK1	22.0815	21.4781	21.3646	21.5405	21.3063	21.1879
	0.617818	0.143253	P49760;P49760-3	P49760-3;B1AVT0;P49760	CLK2_HUMAN	CLK2	Dual specificity protein kinase CLK2	24.5763	24.2782	24.3426	24.2231	24.1876	24.3566
	0.349068	0.150083	P49761;P49761-1	P49761-1;H3BUL5;H3BVF8;H3BQG1;P49761	CLK3_HUMAN	CLK3	Dual specificity protein kinase CLK3	26.1202	25.5814	25.6306	25.5325	25.6676	25.6817
	1.77941	-0.594435	P49770	H0YJJ8;G3V5E5;P49770	EI2BB_HUMAN	EIF2B2	Translation initiation factor eIF-2B subunit beta	22.7388	22.868	23.1701	23.5593	23.632	23.3689
	0.421756	0.221993	P49790	P49790-2;P49790-3;P49790	NU153_HUMAN	NUP153	Nuclear pore complex protein Nup153	23.7404	23.5204	23.481	23.7574	23.2703	23.0482
	0.692441	0.309634	P49792	F8WBP7;A0A8V8TL79;P49792	RBP2_HUMAN	RANBP2	E3 SUMO-protein ligase RanBP2	21.2106	20.7501	20.6024	20.7209	20.434	20.4793
	0.0705565	-0.272725	P49815-3;P49815-5	P49815-6;P49815-7;P49815-2;P49815-3;P49815-4;P49815-5;A0A2R8Y7X5;A0A2R8Y7C8;A0A2R8Y6C9;A0A2R8Y5F1;A0A2R8YGU4;A0A2R8YDZ2;A0A2R8YDR3;A0A2R8YGD6;H3BMQ0;X5D2U8;P49815	TSC2_HUMAN	TSC2	Isoform of P49815, Isoform 3 of Tuberin	21.0914	21.0075	20.0761	23.5165	20.3812	19.0955
	0.293943	0.0958792	P49916-3	P49916-2;P49916-3;P49916-4;K7ENR9;K7ERZ5;P49916	DNLI3_HUMAN	LIG3	Isoform of P49916, Isoform 3 of DNA ligase 3	24.1831	24.129	24.0343	24.2551	23.9732	23.8304
	0.249943	0.111024	P49959;P49959-2;P49959-3	F8W7U8;P49959-2;P49959-3;P49959	MRE11_HUMAN	MRE11	Double-strand break repair protein MRE11	20.9893	20.4174	20.7031	20.4917	20.5826	20.7024
	0.129397	0.064874	P50148	B1AM21;P50148	GNAQ_HUMAN	GNAQ	Guanine nucleotide-binding protein G(q) subunit alpha	20.9831	21.374	21.5933	21.3424	21.2055	21.2078
	0.0343459	-0.0270271	P50395	Q5SX90;Q5SX86;Q5SX87;V9GYF8;P50395	GDIB_HUMAN	GDI2	Rab GDP dissociation inhibitor beta	19.3218	20.1753	19.63	19.5526	19.813	19.8427
	0.888613	0.187724	P50402	A0A804HIV7;A0A804HLA2;P50402	EMD_HUMAN	EMD	Emerin	23.7024	23.5829	23.4228	23.3051	23.3492	23.4906
	0.109993	0.0633901	P50416	P50416-2;P50416	CPT1A_HUMAN	CPT1A	Carnitine O-palmitoyltransferase 1, liver isoform	25.7281	25.2228	25.1259	25.4658	25.2743	25.1465
	0.645045	-0.317899	P50454	E9PPV6;E9PR70;E9PJH8;E9PKH2;P50454	SERPH_HUMAN	SERPINH1	Serpin H1	21.5833	22.0126	21.3046	22.0905	21.7985	21.9652
	0.0246742	0.0312862	P50502	P50502;Q8NFI4	F10A1_HUMAN	ST13	Hsc70-interacting protein	22.4535	22.2199	21.0911	21.8146	21.9999	21.856
	0.0345021	0.0210565	P50579	F8VZX9;F8VY03;F8VQZ7;F8VSC4;F8VRR3;G3V1U3;P50579-2;P50579	MAP2_HUMAN	METAP2	Methionine aminopeptidase 2	24.1569	24.5288	24.1924	24.3659	24.5055	23.9435
	0.130858	-0.0800451	P50613	D6REC6;D6RAD4;D6R9G1;P50613	CDK7_HUMAN	CDK7	Cyclin-dependent kinase 7	24.1506	23.7367	23.4138	23.9737	23.8407	23.7267
	0.530837	-0.328634	P50748	P50748-2;P50748	KNTC1_HUMAN	KNTC1	Kinetochore-associated protein 1	21.612	21.5925	21.7375	21.584	21.8532	22.4908
	1.08773	-0.103989	P50750;P50750-2	P50750-2;P50750	CDK9_HUMAN	CDK9	Cyclin-dependent kinase 9	24.6818	24.6908	24.7305	24.7804	24.747	24.8875
	0.181009	0.063303	P50897	P50897-2;A0A286YFL6;A0A286YFL8;A0A286YFF7;A0A286YFE3;Q5T0S4;A0A2C9F2P4;P50897	PPT1_HUMAN	PPT1	Palmitoyl-protein thioesterase 1	21.332	21.24	21.1511	21.1631	20.9734	21.3967
	1.11519	0.226106	P50914	E7EPB3;P50914	RL14_HUMAN	RPL14	Large ribosomal subunit protein eL14	32.9111	32.7092	32.7389	32.4428	32.69	32.548
	0.0183843	0.00491269	P50990	P50990-2;P50990-3;H7C4C8;P50990	TCPQ_HUMAN	CCT8	T-complex protein 1 subunit theta	24.5826	24.6981	24.4045	24.5086	24.5734	24.5884
	0.0722744	0.0254803	P50991	P50991-2;P50991	TCPD_HUMAN	CCT4	T-complex protein 1 subunit delta	23.8881	23.8643	23.6483	23.7361	23.9591	23.6291
	0.504117	0.228397	P51114	E7EU85;B4DXZ6;E9PFF5;A0A8V8TNP6;A0A8V8TMQ1;P51114-2;P51114-3;P51114	FXR1_HUMAN	FXR1	RNA-binding protein FXR1	29.3758	28.8839	28.7538	28.8922	28.7117	28.7244
	0.545478	0.244312	P51114-2	E7EU85;E9PFF5;A0A8V8TNP6;P51114-2	FXR1_HUMAN	FXR1	Isoform of P51114, Isoform 2 of RNA-binding protein FXR1	24.0785	24.2283	23.8913	23.532	23.805	24.1282
	0.536696	0.206792	P51116	A0A994J7P9;P51116	FXR2_HUMAN	FXR2	RNA-binding protein FXR2	27.3112	26.9358	26.8143	26.9723	26.708	26.7606
	0.0172185	-0.0182355	P51148;P51148-2	P51148-2;F8VVK3;F8VVZ0;F8VUA5;P20339-2;P61020-2;K7ENY4;K7ERI8;K7ERQ8;P20339;P61020;P51148	RAB5C_HUMAN	RAB5C	Ras-related protein Rab-5C	21.2475	20.8885	20.6019	21.5103	20.5206	20.7617
	1.01134	-0.187905	P51149	C9IZZ0;C9J7D1;C9J8S3;C9J4V0;C9J4S4;C9J592;A0A6Q8PG52;A0A6Q8PH84;P51149	RAB7A_HUMAN	RAB7A	Ras-related protein Rab-7a	21.7245	21.4975	21.5053	21.852	21.7007	21.7384
	0.0433009	0.0257804	P51153	A0A087WWB9;P51153	RAB13_HUMAN	RAB13	Ras-related protein Rab-13	22.8231	22.5386	22.6477	23.0143	22.4761	22.4417
	0.761274	1.14102	P51397	P51397	DAP1_HUMAN	DAP	Death-associated protein 1	25.8256	25.0117	23.593	23.951	23.8276	23.2286
	0.509078	-0.140247	P51398;P51398-2;P51398-3	V9GYL9;V9GZ03;P51398-2;P51398-3;P51398	RT29_HUMAN	DAP3	Small ribosomal subunit protein mS29	25.0623	24.945	25.3202	25.3391	25.2328	25.1764
	0.0599315	0.0577793	P51531;P51531-2	F6VDE0;A0A0U1RQZ9;A0A0U1RQE1;P51531-2;A0A994HRU5;A0A994J4Z7;A0A994J501;P51531	SMCA2_HUMAN	SMARCA2	Probable global transcription activator SNF2L2	19.591	19.8098	19.7017	20.1208	19.7938	19.0146
	0.076809	-0.027298	P51532-2;P51532-3;P51532-4;P51532-5	F6VDE0;A0A2R8Y7Y7;A0A2R8Y7S2;A0A2R8Y7F3;A0A0U1RQZ9;A0A2R8Y6V2;A0A2R8Y6N0;P51531-2;P51532-2;P51532-3;P51532-4;P51532-5;A0A2R8Y440;A0A2R8Y4P4;A0A2R8Y4R6;A0A2R8Y526;A0A2R8Y4C5;A0A2R8YGP5;A0A2R8YDA1;A0A2R8YCY3;A0A2R8YGG3;A0A2R8YFV8;A0A2R8YG32;A0A2R8YF80;A0A2R8YF58;Q9HBD4;A0A994HRU5;A0A994J6Y9;A0A994J4Z2;A0A994J4Z7;A0A994J501;P51531;P51532	SMCA4_HUMAN	SMARCA4	Isoform of P51532, Isoform 2 of Transcription activator BRG1	23.5887	23.4211	23.2446	23.5922	23.338	23.4061
	0.320752	-0.122935	P51571	P51571	SSRD_HUMAN	SSR4	Translocon-associated protein subunit delta	22.7462	22.539	22.6686	22.7865	22.517	23.0191
	0.593343	-0.301852	P51572;P51572-2	C9J0M4;A0A2R8Y5M6;P51572-2;C9JSP1;C9JQ75;C9JMD7;P51572	BAP31_HUMAN	BCAP31	B-cell receptor-associated protein 31	23.0472	22.2879	22.6688	22.8912	23.0888	22.9294
	0.32726	-0.164741	P51608;P51608-2	P51608-2;P51608	MECP2_HUMAN	MECP2	Methyl-CpG-binding protein 2	18.9599	19.6046	19.5197	19.494	19.4709	19.6135
	0.0183674	0.0180276	P51617;P51617-2;P51617-3;P51617-4	F8WAB6;P51617-2;P51617-3;P51617-4;H7C224;D3YTB5;P51617	IRAK1_HUMAN	IRAK1	Interleukin-1 receptor-associated kinase 1	23.6771	23.7797	23.8905	23.2993	23.6151	24.3788
	0.631357	0.303865	P51648;P51648-2	A0A5F9ZHI5;A0A5F9ZHN9;A0A5F9ZI12;A0A5F9ZGX4;A0A5K1VW72;J3QRD1;P51648-2;P51648	AL3A2_HUMAN	ALDH3A2	Aldehyde dehydrogenase family 3 member A2	22.7863	22.9136	22.5042	22.5877	22.6329	22.0719
	0.144872	-0.0613473	P51659	E7EPL9;E7ER27;A0A2R8YDT8;A0A2R8YD50;A0A2R8YF45;A0A2R8YEG2;A0A804HIR1;A0A804HLJ0;A0A804HK65;A0A804HKU2;A0A804HKT2;P51659	DHB4_HUMAN	HSD17B4	Peroxisomal multifunctional enzyme type 2	21.1475	21.2022	20.9003	21.3978	21.0344	21.0019
	1.31335	-0.743666	P51665	H3BTM8;H3BQV2;H3BNT7;P51665	PSMD7_HUMAN	PSMD7	26S proteasome non-ATPase regulatory subunit 7	21.6976	22.1605	21.6686	22.7568	22.1644	22.8364
	0.3681	-0.117877	P51812	B7ZB17;B4DG22;B1AXG1;P51812	KS6A3_HUMAN	RPS6KA3	Ribosomal protein S6 kinase alpha-3	21.3066	21.4826	21.2079	21.6612	21.3124	21.3771
	0.00636579	0.00469335	P51825-2	P51825-2;P51825-3;A0A669KBI3;F5GXF9;P51825	AFF1_HUMAN	AFF1	Isoform of P51825, Isoform 2 of AF4/FMR2 family member 1	21.8756	21.5947	21.2	21.7179	21.6685	21.2698
	0.238362	0.1186	P51858	P51858-2;P51858-3;P51858	HDGF_HUMAN	HDGF	Hepatoma-derived growth factor	24.4496	24.3149	23.8692	23.9368	24.1024	24.2387
	0.432453	0.171347	P51946	A0A2R8YEM2;D6RG18;D6RHI7;P51946	CCNH_HUMAN	CCNH	Cyclin-H	20.7881	20.8552	20.6627	20.6243	20.3078	20.8598
	0.721273	0.0994422	P51948	P51948-2;P51948	MAT1_HUMAN	MNAT1	CDK-activating kinase assembly factor MAT1	21.9677	21.8536	21.789	21.7016	21.7919	21.8184
	0.728446	0.3889	P51991;P51991-2	P51991-2;A0A7I2V2R3;A0A7I2V402;A0A7I2V4G0;A0A7I2V4J6;A0A7I2V5D8;P51991	ROA3_HUMAN	HNRNPA3	Heterogeneous nuclear ribonucleoprotein A3	23.8701	23.3716	23.1733	23.0095	23.3347	22.904
	0.052409	-0.00438182	P52272;P52272-2	P52272-2;M0QZM1;A0A087X0X3;P52272	HNRPM_HUMAN	HNRNPM	Heterogeneous nuclear ribonucleoprotein M	28.8984	28.8528	28.8852	28.9058	28.8325	28.9112
	1.26821	-0.279648	P52292	A0A7I2YQE1;A0A7I2V351;A0A7I2V3Z3;A0A7I2V487;P52292	IMA1_HUMAN	KPNA2	Importin subunit alpha-1	25.0643	24.9394	24.907	25.0707	25.306	25.373
	0.489986	-0.367207	P52294	C9J352;C9J4U1;C9JYI4;C9JWD9;F2Z3G4;P52294	IMA5_HUMAN	KPNA1	Importin subunit alpha-5	22.5236	22.9695	23.2365	22.7738	23.5364	23.5211
	0.0935237	-0.0251446	P52298	C9JQX9;P52298-2;P52298-3;F6WVI0;P52298	NCBP2_HUMAN	NCBP2	Nuclear cap-binding protein subunit 2	22.7482	22.8888	22.5843	22.7665	22.6988	22.8315
	0.66191	-0.172929	P52434	C9JLU1;P52434-3;P52434-4;P52434	RPAB3_HUMAN	POLR2H	DNA-directed RNA polymerases I, II, and III subunit RPABC3	22.8724	22.9576	22.8523	22.9387	22.9682	23.2942
	0.131742	0.110288	P52435	E7EWC6;E7EP90;D6RAG0;E2QRJ6;A0A0B4J2F8;A0A0B4J1Z8;H0Y980;P52435	RPB11_HUMAN	POLR2J	DNA-directed RNA polymerase II subunit RPB11-a	22.9976	23.2514	23.0057	22.8871	22.5105	23.5262
	0.1708	-0.191105	P52594;P52594-2;P52594-3;P52594-4	C9J2I0;P52594-2;P52594-3;P52594-4;B8ZZY2;P52594	AGFG1_HUMAN	AGFG1	Arf-GAP domain and FG repeat-containing protein 1	21.6164	21.1523	20.7924	20.6812	21.7696	21.6836
	0.032142	-0.0162354	P52597	P52597	HNRPF_HUMAN	HNRNPF	Heterogeneous nuclear ribonucleoprotein F	25.3093	25.3197	25.6071	25.2209	25.3699	25.694
	0.304638	0.0386117	P52701	P52701-2;P52701-3;P52701-4;A0A8V8TQJ0;A0A8V8TQW9;A0A8V8TPJ4;A0A494C0M1;P52701	MSH6_HUMAN	MSH6	DNA mismatch repair protein Msh6	25.9153	25.7788	25.8525	25.8672	25.8115	25.752
	0.577599	0.418727	P52732	A0A7I2YQY4;A0A7I2V3A9;A0A7I2V3V3;P52732	KIF11_HUMAN	KIF11	Kinesin-like protein KIF11	20.7249	21.0582	20.9014	20.7156	20.8483	19.8644
	0.40289	0.150455	P52756	P52756	RBM5_HUMAN	RBM5	RNA-binding protein 5	23.164	22.8982	22.8066	22.9203	22.5731	22.9241
	0.0681303	0.0666962	P52788	H7C2R7;P52788	SPSY_HUMAN	SMS	Spermine synthase	25.2589	24.5839	24.4052	24.2406	24.8683	24.939
	0.169798	-0.0360336	P52815	B4DLN1;P52815	RM12_HUMAN	MRPL12	Large ribosomal subunit protein bL12m	23.3213	23.056	23.2013	23.254	23.2504	23.1823
	0.536114	0.157321	P52907	P52907	CAZA1_HUMAN	CAPZA1	F-actin-capping protein subunit alpha-1	26.7051	26.9899	27.0142	26.7568	26.8838	26.5966
	0.0341649	-0.0227661	P52948;P52948-2;P52948-5	P52948-3;P52948-4;P52948-2;P52948-5;P52948-6;H0YEN4;H0YDA1;H0YCR0;A0A8V8TRC7;A0A8V8TRD0;A0A8V8TQF7;A0A8V8TQG5;A0A8V8TR21;A0A8V8TR23;A0A8V8TPX4;A0A3B3ITD8;P52948	NUP98_HUMAN	NUP98	Nuclear pore complex protein Nup98-Nup96	21.3061	21.5595	21.1436	21.2458	21.1019	21.7298
	0.00341211	-0.00279363	P53007	P53007	TXTP_HUMAN	SLC25A1	Tricarboxylate transport protein, mitochondrial	23.0034	22.3285	22.3365	22.8441	22.4795	22.3531
	0.349561	0.506341	P53041	A8MU39;P53041	PPP5_HUMAN	PPP5C	Serine/threonine-protein phosphatase 5	23.9368	23.326	22.5611	23.6303	22.5659	22.1087
	0.470326	0.0931505	P53350	P53350	PLK1_HUMAN	PLK1	Serine/threonine-protein kinase PLK1	21.5446	21.7303	21.8171	21.6432	21.6242	21.5452
	1.80733	-0.366597	P53396;P53396-2	P53396-2;P53396-3;P53396	ACLY_HUMAN	ACLY	ATP-citrate synthase	22.1015	21.874	22.1696	22.3865	22.4188	22.4396
	0.295356	0.0676696	P53618	P53618	COPB_HUMAN	COPB1	Coatomer subunit beta	24.1678	23.9154	23.8778	23.8962	23.9064	23.9554
	1.36762	-0.293018	P53621	P53621-2;A0A3B3IS84;A0A3B3IT15;A0A3B3ISC6;A0A3B3ITV3;A0A3B3IU89;P53621	COPA_HUMAN	COPA	Coatomer subunit alpha	25.411	25.3639	25.611	25.6249	25.8084	25.8317
	0.016572	0.0141919	P53634	A0A7I2YQT5;A0A7I2V6E3;A0A7I2V2Q8;A0A7I2V466;P53634	CATC_HUMAN	CTSC	Dipeptidyl peptidase 1	22.0438	22.8907	22.3739	22.1512	22.6285	22.486
	0.330152	0.278068	P53680	P53680-2;M0R0N4;M0QYZ2;X6R390;P53680	AP2S1_HUMAN	AP2S1	AP-2 complex subunit sigma	21.8558	21.9375	21.3197	21.9854	21.2637	21.0297
	0.263473	0.0726178	P53804	H7BZ57;A0A8Q3WLN3;P53804-2;P53804-3;P53804	TTC3_HUMAN	TTC3	E3 ubiquitin-protein ligase TTC3	20.5977	20.6397	20.5512	20.3218	20.5629	20.6861
	0.943446	-0.390738	P53814;P53814-5;P53814-6	P53814-2;P53814-5;P53814-6;A0A087X1R1;A0A087WVP4;P53814	SMTN_HUMAN	SMTN	Smoothelin	19.9351	20.5433	20.4835	20.7029	20.7017	20.7296
	0.372803	0.516453	P53985	P53985-2;Q5T8R3;Q5T8R4;Q5T8R5;P53985	MOT1_HUMAN	SLC16A1	Monocarboxylate transporter 1	25.0889	24.095	23.4951	24.3869	23.5085	23.2343
	0.190767	0.154764	P53999	D6RC37;D6R970;P53999	TCP4_HUMAN	SUB1	Activated RNA polymerase II transcriptional coactivator p15	30.167	30.1068	29.5265	30.0714	29.9488	29.3158
	0.169161	-0.0549024	P54132	H0YNU5;A0A7P0TBM9;A0A3B3IT82;P54132	BLM_HUMAN	BLM	RecQ-like DNA helicase BLM	22.4364	22.1732	22.0515	22.2651	22.2012	22.3596
	0.615606	-0.0736631	P54136	P54136-2;P54136	SYRC_HUMAN	RARS1	Arginine--tRNA ligase, cytoplasmic	24.5208	24.598	24.494	24.5777	24.558	24.6981
	0.842765	0.320477	P54259	P54259	ATN1_HUMAN	ATN1	Atrophin-1	24.0395	24.1521	23.5989	23.6575	23.6653	23.5063
	1.14811	-0.522093	P54278	C9J167;A0A2R8Y6S3;P54278-3;A0A8V8TQG9;A0A8V8TQI1;A0A8V8TQS5;A0A8V8TP84;A0A8V8TP89;A0A8V8TPE1;A0A8V8TQ50;A0A8V8TQ92;A0A8V8TNX6;A0A8V8TNY8;A0A8V8TP61;A0A8V8TNR7;P54278	PMS2_HUMAN	PMS2	Mismatch repair endonuclease PMS2	19.85	19.678	20.3397	20.4879	20.6119	20.3344
	0.128325	-0.0456225	P54577	A0A6Q8PFX2;P54577	SYYC_HUMAN	YARS1	Tyrosine--tRNA ligase, cytoplasmic	24.5677	24.6646	24.408	24.3995	24.7685	24.6092
	1.01132	0.426016	P54619;P54619-2;P54619-3	H0YIC9;H0YHF8;P54619-2;P54619-3;F8VYY9;F8VZX1;P54619	AAKG1_HUMAN	PRKAG1	5'-AMP-activated protein kinase subunit gamma-1	20.9994	21.2947	21.258	21.058	20.7624	20.4536
	0.234628	0.0436865	P54727	P54725-2;P54725-3;Q5W0S5;A0A494C0B4;K7ELW1;K7ENJ0;P54725;P54727	RD23B_HUMAN	RAD23B	UV excision repair protein RAD23 homolog B	22.9593	23.0656	23.019	23.0037	22.8431	23.0659
	0.0456514	-0.0216649	P55010	H0YN40;H0YMJ8;H0YM54;H0YLZ1;P55010	IF5_HUMAN	EIF5	Eukaryotic translation initiation factor 5	23.6852	23.6736	23.4598	23.86	23.6616	23.3619
	0.141414	-0.0652033	P55036	Q5VWC4;P55036-2;A6PVX3;P55036;A2A3N6	PSMD4_HUMAN	PSMD4	26S proteasome non-ATPase regulatory subunit 4	21.4027	21.2208	21.4132	21.2195	21.7264	21.2864
	0.0983349	0.0468286	P55060;P55060-3	P55060-3;P55060-4;P55060	XPO2_HUMAN	CSE1L	Exportin-2	24.4347	24.2319	23.9936	24.3942	24.1077	24.0178
	0.0237716	-0.00936953	P55072	C9JUP7;A0A7P0T8Q5;A0A7P0T8A3;A0A7P0TAW3;A0A7P0TA22;A0A7I2V540;P55072	TERA_HUMAN	VCP	Transitional endoplasmic reticulum ATPase	22.9557	23.3061	23.1889	23.1925	23.2827	23.0036
	0.571619	0.0755577	P55081	P55081	MFAP1_HUMAN	MFAP1	Microfibrillar-associated protein 1	26.6039	26.6047	26.7632	26.5998	26.6141	26.5313
	0.769262	0.486624	P55084	B5MD38;P55084-2;F5GZQ3;P55084	ECHB_HUMAN	HADHB	Trifunctional enzyme subunit beta, mitochondrial	22.8889	22.6157	21.9777	21.8795	22.2251	21.9178
	0.0099712	-0.00597445	P55198	P55198	AF17_HUMAN	MLLT6	Protein AF-17	20.0583	19.9787	19.7965	19.6981	19.8506	20.3027
	0.287068	0.154743	P55201;P55201-2;P55201-3;P55201-4	P55201-2;P55201-3;P55201-4;C9JHC0;A0A804HHW3;A0A804HI52;A0A804HIN1;A0A5F9ZH11;A0A5F9ZHW9;A0A5F9ZHX4;A0A8C8KWW5;A0A8C8L8G4;A0A804HJV3;A0A804HL48;A0A804HKY8;A0A804HKK9;P55201	BRPF1_HUMAN	BRPF1	Peregrin	21.666	21.5687	21.8385	21.9105	21.2135	21.485
	0.212206	0.165328	P55209-3	P55209-3;F8VV59;F8VRJ2;F8W118;B7Z9C2	NP1L1_HUMAN	NAP1L1	Isoform of P55209, Isoform 3 of Nucleosome assembly protein 1-like 1	22.6459	23.0591	22.8342	22.2161	22.6505	23.1765
	0.296486	0.0465895	P55209;P55209-2	H0YIV4;H0YHC3;P55209-2;P55209-3;H0YH88;F8VXI6;F8VY35;F8VVB5;F8VUX1;F8VV59;F8W543;F8VRJ2;F8W118;F8W0J6;F8W020;B7Z9C2;F5H4R6;P55209	NP1L1_HUMAN	NAP1L1	Nucleosome assembly protein 1-like 1	29.3652	29.3156	29.3989	29.1983	29.3484	29.3933
	0.0218613	0.00759761	P55265;P55265-4	A0A7P0Z4K3;A0A3B3IRQ9;A0A3B3ISU1;A0A3B3ISX1;A2IBT1;P55265-2;P55265-3;P55265-4;P55265	DSRAD_HUMAN	ADAR	Double-stranded RNA-specific adenosine deaminase	23.9111	23.8053	23.582	23.7303	23.6654	23.88
	0.463338	-0.13986	P55735	P55735	SEC13_HUMAN	SEC13	Protein SEC13 homolog	23.034	22.5991	22.9019	22.9576	22.9703	23.0267
	1.53312	-0.278746	P55769	P55769	NH2L1_HUMAN	SNU13	NHP2-like protein 1	26.3298	26.2174	26.3506	26.7175	26.471	26.5455
	0.802112	0.24787	P55795	P55795	HNRH2_HUMAN	HNRNPH2	Heterogeneous nuclear ribonucleoprotein H2	23.2303	23.0015	23.3986	22.8322	23.1211	22.9334
	1.70773	-0.401495	P55854;P55854-2	A8MU27;A8MUA9;P61956-2;P55854-2;Q6EEV6;P61956;P55854	SUMO3_HUMAN	SUMO3	Small ubiquitin-related modifier 3	22.4912	22.4053	22.3238	22.9428	22.8569	22.6251
	1.20051	0.141264	P55884;P55884-2	P55884-2;C9JZG1;C9JQN7;P55884	EIF3B_HUMAN	EIF3B	Eukaryotic translation initiation factor 3 subunit B	29.3526	29.3059	29.3321	29.2009	29.2753	29.0906
	0.216149	0.132409	P56134-2;P56134-4	C9JU26;P56134-2;P56134-3;P56134-4;C9JJT5;G3V325;P56134	ATPK_HUMAN	ATP5MF	Isoform of P56134, Isoform 2 of ATP synthase subunit f, mitochondrial	23.2848	23.0081	22.6857	23.1692	22.6123	22.7999
	0.0231464	-0.00361888	P56182	D6RE82;P56182	RRP1_HUMAN	RRP1	Ribosomal RNA processing protein 1 homolog A	25.0007	24.9908	24.8431	24.9589	24.9256	24.9611
	0.10982	0.0283661	P56192	P56192-2;P56192	SYMC_HUMAN	MARS1	Methionine--tRNA ligase, cytoplasmic	23.3993	23.3808	23.2456	23.3064	23.4553	23.1789
	0.403269	-0.111131	P56270-2	P56270-2;P56270-3;P56270-4;H3BQI4;H3BQS2;H3BPU3;I3L4Y2;I3L411;I3L2Z5;I3L0M3;P56270	MAZ_HUMAN	MAZ	Isoform of P56270, Isoform 2 of Myc-associated zinc finger protein	23.5499	23.3821	23.3539	23.7385	23.433	23.4478
	0.590366	0.519348	P56378	P56378-2;G3V556;A0A0A0MTQ5;P56378	ATP68_HUMAN	ATP5MJ	ATP synthase subunit ATP5MJ, mitochondrial	22.4565	22.6568	21.5797	21.9252	21.9225	21.2873
	0.301685	0.0948677	P56381;Q5VTU8	Q5VTU8;P56381	AT5EL_HUMAN;ATP5E_HUMAN	ATP5F1E;ATP5F1EP2	ATP synthase subunit epsilon, mitochondrial	22.4865	22.396	22.7197	22.5895	22.4287	22.2994
	0.176417	0.286332	P56385	P56385	ATP5I_HUMAN	ATP5ME	ATP synthase subunit e, mitochondrial	22.5867	22.2717	23.1136	21.3235	23.2607	22.5288
	1.39299	-0.301264	P56537	P56537-2;A0A0U1RQV5;P56537	IF6_HUMAN	EIF6	Eukaryotic translation initiation factor 6	29.1326	29.1349	29.4217	29.5335	29.4761	29.5834
	0.323867	1.44887	P56556	A0A2Y9D025;R4GN43;P56556	NDUA6_HUMAN	NDUFA6	NADH dehydrogenase [ubiquinone] 1 alpha subcomplex subunit 6	20.9345	20.8393	20.5795	21.1273	21.2113	15.6681
	0.185371	0.267764	P56589	P56589	PEX3_HUMAN	PEX3	Peroxisomal biogenesis factor 3	20.5854	20.3601	20.16	21.146	19.7947	19.3615
	0.141732	0.136353	P57076	P57076	CF298_HUMAN	CFAP298	Cilia- and flagella-associated protein 298	25.1384	24.8024	24.2645	25.0707	24.5038	24.2218
	0.0143485	-0.00611305	P57088	D6RAA6;P57088	TMM33_HUMAN	TMEM33	Transmembrane protein 33	23.868	23.7706	23.7128	23.8242	24.0022	23.5434
	0.318131	-0.0558637	P57678	I3L4A4;I3L399;I3L2C7;P57678	GEMI4_HUMAN	GEMIN4	Gem-associated protein 4	25.1894	24.9616	25.0732	25.1728	25.1443	25.0747
	0.00663431	-0.00682831	P57737-3;Q9Y3D7	P57737-3;A0A0A6YYL4;A0A0B4J298;I3L3T0;I3L1U7;I3L0X9;Q9Y3D7	CORO7_HUMAN;TIM16_HUMAN	CORO7;PAM16	Isoform of P57737, Isoform 3 of Coronin-7	26.0705	25.486	24.9119	25.4386	25.5902	25.4601
	0.873012	-0.272736	P57740	P57740-2;P57740-3;P57740	NU107_HUMAN	NUP107	Nuclear pore complex protein Nup107	20.8282	21.0542	20.9473	21.2159	20.9909	21.441
	0.471114	-0.194504	P57772	C9J8T0;P57772	SELB_HUMAN	EEFSEC	Selenocysteine-specific elongation factor	23.4774	23.7705	23.7547	23.6296	24.1464	23.81
	0.0286159	-0.0168374	P57775	A0A5F9UQ55;P57775	FBXW4_HUMAN	FBXW4	F-box/WD repeat-containing protein 4	23.1405	22.5273	22.7021	22.9565	22.7054	22.7585
	0.136121	0.0791194	P58107	A0A075B730;P58107	EPIPL_HUMAN	EPPK1	Epiplakin	24.869	24.7335	24.8757	24.3453	25.0508	24.8447
	1.50653	0.318981	P58317	P58317	ZN121_HUMAN	ZNF121	Zinc finger protein 121	22.9287	22.8896	22.6748	22.3963	22.5752	22.5647
	0.0418107	-0.0455316	P59780	H0YLI7;Q7Z6K5-2;A0A0A6YYH1;P59780	AP3S2_HUMAN	AP3S2	AP-3 complex subunit sigma-2	23.8606	23.4325	23.4813	23.9893	23.9753	22.9464
	0.607165	-0.336924	P59998	P59998-2;P59998-3;F8WDD7;F8WCF6;H7C0A3;A0A0A6YYG9;P59998	ARPC4_HUMAN	ARPC4	Actin-related protein 2/3 complex subunit 4	24.73	25.3104	25.5398	25.5681	25.6132	25.4097
	0.22792	-0.293247	P60002	A0A024R7E8;K7EN05;K7EMV4;K7EQ44;K7EPC8;P60002	ELOF1_HUMAN	ELOF1	Transcription elongation factor 1 homolog	23.5282	22.7429	23.813	24.0139	24.0726	22.8774
	0.0419542	-0.0690734	P60059	P60059	SC61G_HUMAN	SEC61G	Protein transport protein Sec61 subunit gamma	25.4215	24.6002	23.6153	24.9545	24.6427	24.2469
	0.336676	0.259982	P60174;P60174-3	U3KPZ0;U3KQF3;P60174-3;P60174-4;P60174	TPIS_HUMAN	TPI1	Triosephosphate isomerase	21.3022	21.648	21.3519	20.5791	21.4044	21.5387
	0.337602	0.0586116	P60228	B3KW56;E5RGA2;E5RHS5;A0A7I2V2H9;A0A7I2V2W0;A0A7I2V3I0;A0A7I2V3I2;A0A7I2V3S3;A0A7I2V4B4;A0A7I2V5P9;A0A7I2V5Z6;P60228	EIF3E_HUMAN	EIF3E	Eukaryotic translation initiation factor 3 subunit E	28.9192	28.8931	28.9637	28.8559	28.9907	28.7535
	0.243595	0.074557	P60468	P60468	SC61B_HUMAN	SEC61B	Protein transport protein Sec61 subunit beta	24.4853	24.2622	24.0796	24.259	24.1771	24.1674
	0.214802	0.026872	P60660-2	J3KND3;G8JLA2;F8VZU9;F8W180;F8W1R7;F8VPF3;B7Z6Z4;G3V1V0;G3V1Y7;P60660-2;P60660	MYL6_HUMAN	MYL6	Isoform of P60660, Isoform Smooth muscle of Myosin light polypeptide 6	28.3674	28.485	28.4383	28.4453	28.43	28.3348
	0.467728	0.438888	P60709	A0A2R8Y793;E7EVS6;A0A6Q8PGD7;A0A6Q8PH58;A0A2R8YGF8;C9JZR7;C9JTX5;C9JUM1;G5E9R0;P60709	ACTB_HUMAN	ACTB	Actin, cytoplasmic 1	27.6548	27.8751	27.2691	26.7604	27.8906	26.8314
	0.391538	-0.150945	P60842	J3KS25;J3KT12;J3KSZ0;P60842-2;J3QKZ9;J3QL43;J3QLN6;J3QR64;J3QS69;P60842	IF4A1_HUMAN	EIF4A1	Eukaryotic initiation factor 4A-I	24.5228	24.7243	25.0499	24.816	24.9991	24.9347
	0.433187	0.108785	P60866;P60866-2	A0A7P0S5H5;P60866-2;E5RJX2;P60866	RS20_HUMAN	RPS20	Small ribosomal subunit protein uS10	32.8792	33.0855	32.8998	33.0164	32.7611	32.7607
	0.334058	-0.0857417	P60891	P60891-2;A0A2R8Y7H4;P11908-2;A0A6Q8PGP2;A0A0A0MRQ9;H7C540;B1ALA9;A0A0B4J207;P21108;P11908;P60891	PRPS1_HUMAN	PRPS1	Ribose-phosphate pyrophosphokinase 1	22.6714	22.9523	22.7207	22.7497	22.9536	22.8984
	0.128076	0.0865472	P60900	P60900-2;G3V5Z7;G3V3I1;G3V295;P60900	PSA6_HUMAN	PSMA6	Proteasome subunit alpha type-6	21.3831	21.3631	21.2353	20.7876	21.6221	21.3122
	0.493751	0.33998	P60903	P60903	S10AA_HUMAN	S100A10	Protein S100-A10	25.1961	25.2215	24.5057	24.9922	24.5535	24.3576
	0.268199	0.199259	P60953	P60953	CDC42_HUMAN	CDC42	Cell division control protein 42 homolog	22.1103	22.3062	22.7998	21.777	22.4453	22.3961
	0.0552612	-0.019762	P61011	G3V480;G3V4F7;A0A7P0PJI2;P61011-2;A0A7I2V584;A0A7I2V5K0;P61011	SRP54_HUMAN	SRP54	Signal recognition particle subunit SRP54	25.7357	25.9627	26.1557	25.9755	26.0071	25.9308
	0.657672	0.173518	P61073;P61073-2	P61073-2;A0A8Q3WLL1;A0A8Q3WL10;P61073	CXCR4_HUMAN	CXCR4	C-X-C chemokine receptor type 4	23.0383	23.0393	22.7493	22.896	22.7575	22.6529
	0.0356584	-0.0168196	P61158	B4DXW1;P61158	ARP3_HUMAN	ACTR3	Actin-related protein 3	24.7237	24.9823	25.1428	25.0215	25.1107	24.7671
	0.105581	-0.0434361	P61160	A0A1B0GWH0;A0A1B0GWD0;P61160-2;P61160	ARP2_HUMAN	ACTR2	Actin-related protein 2	25.2396	25.5946	25.5405	25.6391	25.5564	25.3095
	0.202052	0.0675233	P61163	A0A1B0GVS3;R4GMT0;P61163	ACTZ_HUMAN	ACTR1A	Alpha-centractin	20.7119	21.0593	20.8407	20.844	20.9158	20.6496
	0.974249	0.342101	P61165	F5GWH5;P61165	TM258_HUMAN	TMEM258	Transmembrane protein 258	21.6226	21.3551	21.5321	21.2579	21.3488	20.8769
	0.162101	0.0320231	P61204;P84077	A0A8V8TQC0;A0A8V8TQP8;A0A8V8TNZ0;A0A8V8TNZ5;P61204-2;H0YGG7;P61204;P84077	ARF1_HUMAN;ARF3_HUMAN	ARF1;ARF3	ADP-ribosylation factor 3	21.7324	21.845	21.7849	21.797	21.6247	21.8444
	0.191556	0.222767	P61218	B0QYL8;B0QYL9;F8WC47;U3KQB0;U3KPY1;U3KQS8;P61218	RPAB2_HUMAN	POLR2F	DNA-directed RNA polymerases I, II, and III subunit RPABC2	23.0054	22.3417	21.7252	21.8136	21.966	22.6244
	1.36499	-0.274645	P61221	D6RGF4;D6R9I9;H0Y990;P61221	ABCE1_HUMAN	ABCE1	ATP-binding cassette sub-family E member 1	22.67	22.8196	22.788	22.876	23.0726	23.1528
	1.83602	-0.501667	P61244;P61244-2	P61244-2;G3V5L1;G3V302;P61244	MAX_HUMAN	MAX	Protein max	21.8216	22.0698	22.2153	22.6126	22.476	22.5232
	0.358199	0.109928	P61247	D6RG13;D6RED7;D6RAS7;D6RAT0;D6RB09;H0Y8L7;E9PFI5;P61247	RS3A_HUMAN	RPS3A	Small ribosomal subunit protein eS1	33.0811	33.0307	33.1002	32.7095	33.1066	33.066
	0.304733	0.16584	P61254	J3KS10;J3QQV1;J3QRI7;E5RIT6;J3QRC4;J3QQQ9;P61254;Q9UNX3	RL26_HUMAN	RPL26	Large ribosomal subunit protein uL24	32.7057	32.6693	32.8323	32.1396	32.7523	32.8179
	0.304546	0.312562	P61289;P61289-2;P61289-3	P61289-2;P61289-3;K7EKR3;K7EMD0;K7ENH2;K7EPX6;K7ESG5;B3KQ25;K9J957;P61289	PSME3_HUMAN	PSME3	Proteasome activator complex subunit 3	26.3116	25.5873	25.5195	25.3318	26.1324	25.0167
	1.45248	0.340107	P61313	A0A2R8Y738;E7EX53;E7EQV9;A0A2R8YEM3;P61313-2;E7ENU7;P61313	RL15_HUMAN	RPL15	Large ribosomal subunit protein eL15	32.7783	32.6333	32.7509	32.196	32.5361	32.41
	0.882243	0.22596	P61353	K7ELC7;P61353	RL27_HUMAN	RPL27	Large ribosomal subunit protein eL27	32.9877	32.7272	32.6439	32.5122	32.4906	32.6782
	0.420652	0.291121	P61513	Q6P4E4;C9J4Z3;M0R0A1;M0R2L6;G5E9R3;E9PEL3;P61513;A6NKH3	RL37A_HUMAN	RPL37A	Large ribosomal subunit protein eL43	32.0752	32.3003	32.5107	31.4747	32.2107	32.3273
	0.417716	-0.345073	P61586	C9JX21;C9JRM1;Q5JR05;Q5JR06;Q5JR07;Q5JR08;C9JNR4;E9PQH6;E9PLA2;E9PN11;A0A7I2YQV1;A0A7I2V3G1;A0A7I2V5E6;A0A994J514;U3KQA9;U3KQV3;P08134;P62745;P61586	RHOA_HUMAN	RHOA	Transforming protein RhoA	22.1631	21.9719	22.436	21.8944	22.7623	22.9495
	0.26694	0.171487	P61604	B8ZZL8;S4R3N1;P61604	CH10_HUMAN	HSPE1	10 kDa heat shock protein, mitochondrial	23.0308	23.2308	22.5696	22.8353	23.0233	22.4581
	0.595679	0.197353	P61619	C9JXC6;B4DR61;P61619-3;A0A8V8TMZ3;A0A8V8TMZ5;P61619	S61A1_HUMAN	SEC61A1	Protein transport protein Sec61 subunit alpha isoform 1	24.847	24.5698	24.5441	24.2402	24.6158	24.5128
	0.571996	0.194263	P61923	P61923-4;P61923-5;F8VYZ4;F8VXB1;F8VXR1;F8VVA7;F8VUC5;F8W156;P61923	COPZ1_HUMAN	COPZ1	Coatomer subunit zeta-1	21.985	21.9691	21.8096	21.4463	21.8663	21.8683
	0.240571	-0.551496	P61927	D6RG19;D6R9X9;P61927	RL37_HUMAN	RPL37	Large ribosomal subunit protein eL37	26.7361	29.4597	28.3705	29.5465	28.048	28.6263
	0.318396	-0.0807571	P61962	A0A8I5QKQ1;P61962-2;A0A8I5KQ63;A0A8I5KRG1;A0A8I5KTU5;A0A8I5KT41;A0A8I5KX45;A0A8I5KXF0;A0A087WWI6;P61962	DCAF7_HUMAN	DCAF7	DDB1- and CUL4-associated factor 7	24.1904	24.0921	23.9127	24.0415	24.1317	24.2643
	2.1834	-0.677711	P61966	P61966-2;A0A2R8YGH5;H7C1E4;P61966	AP1S1_HUMAN	AP1S1	AP-1 complex subunit sigma-1A	19.9668	20.0684	20.3338	20.9338	20.7784	20.69
	0.333829	0.14035	P61978-3	B4DUQ1;Q5T6W2;A0A994J6T5;A0A994J6U9;A0A994J782;A0A994J4S7;A0A994J4U9;A0A994J4E9;P61978-2;P61978-3;P61978	HNRPK_HUMAN	HNRNPK	Isoform of P61978, Isoform 3 of Heterogeneous nuclear ribonucleoprotein K	26.6539	26.2125	26.1572	26.191	26.3323	26.0792
	0.332532	-0.239758	P61981	P61981	1433G_HUMAN	YWHAG	14-3-3 protein gamma	23.3312	24.0553	23.8426	23.5771	24.1311	24.2402
	0.893226	0.253957	P62070;P62070-4	P62070-2;P62070-3;P62070-4;E9PK85;P62070	RRAS2_HUMAN	RRAS2	Ras-related protein R-Ras2	23.7423	23.8163	23.8903	23.6744	23.7008	23.3118
	1.11738	-0.0655238	P62081	A0A2R8Y623;B5MCP9;P62081	RS7_HUMAN	RPS7	Small ribosomal subunit protein eS7	32.561	32.6139	32.5656	32.6238	32.624	32.6892
	0.0233358	0.0120239	P62136	E9PMD7;P62136-2;P62136-3;A0A7I2V4F7;P62136	PP1A_HUMAN	PPP1CA	Serine/threonine-protein phosphatase PP1-alpha catalytic subunit	23.0993	23.1207	22.7004	22.8314	22.8842	23.1687
	0.25016	-0.0381241	P62140	B4DJ75;A0A8V8TRH9;A0A8V8TQ71;P62140	PP1B_HUMAN	PPP1CB	Serine/threonine-protein phosphatase PP1-beta catalytic subunit	25.0002	24.826	24.9821	24.9814	24.929	25.0122
	1.30627	-0.309172	P62191	P62191-2;P62191	PRS4_HUMAN	PSMC1	26S proteasome regulatory subunit 4	23.0294	22.8915	22.6965	23.0951	23.2824	23.1673
	0.3401	-0.141013	P62195	J3KRP2;P62195-2;J3QLH6;A0A994J6V8;J3QQM1;J3QRR3;J3QSA9;P62195	PRS8_HUMAN	PSMC5	26S proteasome regulatory subunit 8	23.1444	22.9108	23.0754	23.36	23.322	22.8717
	0.407672	0.0708555	P62241	Q5JR95;P62241	RS8_HUMAN	RPS8	Small ribosomal subunit protein eS8	33.0876	32.9425	32.9792	32.8141	33.0037	32.979
	0.281323	-0.0458323	P62244	H3BVC7;I3L3P7;P62244	RS15A_HUMAN	RPS15A	Small ribosomal subunit protein uS8	32.6748	32.6513	32.8377	32.7645	32.7174	32.8194
	0.392383	-0.0380211	P62249	M0R210;P62249	RS16_HUMAN	RPS16	Small ribosomal subunit protein uS9	32.7506	32.6876	32.7415	32.7988	32.6929	32.8021
	0.350091	-0.231405	P62258	P62258-2;K7EM20;P62258	1433E_HUMAN	YWHAE	14-3-3 protein epsilon	24.9901	25.1499	25.3045	24.8644	25.5906	25.6837
	0.120298	0.0535558	P62263	A0A2R8Y811;E5RH77;P62263	RS14_HUMAN	RPS14	Small ribosomal subunit protein uS11	32.681	32.7545	32.7258	32.3666	32.7167	32.9174
	1.10544	0.292454	P62266	P62266	RS23_HUMAN	RPS23	Small ribosomal subunit protein uS12	32.4763	32.2498	32.1036	32.1017	31.9534	31.8973
	0.208344	0.0507851	P62269	J3JS69;P62269	RS18_HUMAN	RPS18	Small ribosomal subunit protein uS13	33.0174	32.9186	33.0499	32.7738	33.0429	33.0169
	0.680002	0.136352	P62273;P62273-2	A0A2R8Y851;A0A2R8Y6P7;P62273-2;A0A087WTT6;P62273	RS29_HUMAN	RPS29	Small ribosomal subunit protein uS14	31.4081	31.6613	31.6207	31.5164	31.403	31.3616
	0.0175136	0.00813548	P62277	P62277	RS13_HUMAN	RPS13	Small ribosomal subunit protein uS15	32.4225	32.3754	32.4178	32.0945	32.594	32.5027
	0.0960285	-0.0287628	P62280	M0R1H6;M0QZC5;P62280	RS11_HUMAN	RPS11	Small ribosomal subunit protein uS17	32.5319	32.6125	32.6605	32.4331	32.6967	32.7613
	0.238797	-0.149494	P62304	P62304	RUXE_HUMAN	SNRPE	Small nuclear ribonucleoprotein E	26.6939	26.4915	26.943	27.1056	27.0282	26.443
	0.504648	0.433181	P62306	F8W0W6;A0A0B4J254;P62306	RUXF_HUMAN	SNRPF	Small nuclear ribonucleoprotein F	28.8175	28.7026	27.9454	28.5329	27.9821	27.651
	1.19765	0.277169	P62314	J3QLI9;P62314	SMD1_HUMAN	SNRPD1	Small nuclear ribonucleoprotein Sm D1	28.6978	28.6599	28.5909	28.3163	28.5742	28.2266
	0.71884	0.396301	P62316	K7ERG4;P62316	SMD2_HUMAN	SNRPD2	Small nuclear ribonucleoprotein Sm D2	29.6943	29.2654	28.9385	29.0793	28.9689	28.661
	0.492773	0.357267	P62316-2	P62316-2	SMD2_HUMAN	SNRPD2	Isoform of P62316, Isoform 2 of Small nuclear ribonucleoprotein Sm D2	20.0542	19.598	19.2222	19.6775	19.0726	19.0524
	1.20591	0.435762	P62318;P62318-2	P62318-2;H3BT13;P62318	SMD3_HUMAN	SNRPD3	Small nuclear ribonucleoprotein Sm D3	29.2022	28.8798	28.644	28.4698	28.5639	28.3851
	0.947779	0.181053	P62424	Q5T8U3;P62424	RL7A_HUMAN	RPL7A	Large ribosomal subunit protein eL8	33.2692	33.038	33.0079	32.8575	32.9428	32.9716
	0.161536	-0.0530605	P62487	H0YEE4;E9PIU7;E9PKH3;P62487	RPB7_HUMAN	POLR2G	DNA-directed RNA polymerase II subunit RPB7	22.3969	22.6589	22.6018	22.4563	22.5803	22.7802
	0.871988	0.297546	P62495	D6RJE8;P62495-2;B7Z7P8;I3L492;P62495	ERF1_HUMAN	ETF1	Eukaryotic peptide chain release factor subunit 1	22.0503	22.1149	21.9201	21.7515	21.9765	21.4647
	0.0679485	-0.0269292	P62633;P62633-2	P62633-3;P62633-4;P62633-5;P62633-6;P62633-7;P62633-8;P62633-2;P62633	CNBP_HUMAN	CNBP	CCHC-type zinc finger nucleic acid binding protein	22.3493	21.937	22.31	22.3046	22.2175	22.1549
	0.105031	0.0145963	P62701	P62701;Q8TD47	RS4X_HUMAN	RPS4X	Small ribosomal subunit protein eS4, X isoform	32.6876	32.5936	32.541	32.5496	32.5898	32.639
	0.976178	0.599924	P62745	P62745	RHOB_HUMAN	RHOB	Rho-related GTP-binding protein RhoB	20.9746	20.6282	20.5605	20.5149	20.2128	19.6359
	0.896905	0.238162	P62750	A8MUS3;H7BY10;K7EJV9;K7EMA7;K7ERT8;P62750	RL23A_HUMAN	RPL23A	Large ribosomal subunit protein uL23	33.0592	32.9372	32.9177	32.5021	32.8568	32.8407
	0.0536472	-0.0037969	P62753	A2A3R5;P62753	RS6_HUMAN	RPS6	Small ribosomal subunit protein eS6	33.0224	32.9729	33.0426	33.0418	33.0075	32.9999
	0.973941	0.200803	P62805	P62805	H4_HUMAN	H4C16	Histone H4	33.789	33.9925	33.8136	33.5229	33.761	33.7088
	0.00608647	0.00333405	P62820	E7END7;P62820-2;P62820	RAB1A_HUMAN	RAB1A	Ras-related protein Rab-1A	22.118	22.0284	21.59	21.7907	22.0486	21.887
	0.745309	-0.236575	P62826	J3KQE5;B4DV51;B5MDF5;F5H018;P62826	RAN_HUMAN	RAN	GTP-binding nuclear protein Ran	23.3199	23.8151	23.5397	23.8165	23.742	23.8259
	0.95842	0.154672	P62829	J3KT29;J3KTJ3;C9JD32;J3QQT9;P62829	RL23_HUMAN	RPL23	Large ribosomal subunit protein uL14	32.9154	32.9387	32.9474	32.6365	32.8904	32.8106
	0.205714	-0.0850531	P62834	E7ESV4;P61224-2;P61224-3;F5GWU8;F5GX62;F5GYH7;F5GYB5;F5H6R7;F5H7Y6;F5H4H0;F5H500;F5H491;F5H0B7;F5H004;F5H077;P62834;P61224	RAP1A_HUMAN	RAP1A	Ras-related protein Rap-1A	23.5196	23.5628	24.0112	23.7255	23.8065	23.8166
	0.766889	0.11353	P62841	K7EJ78;S4R417;A0A0B4J2B4;S4R456;K7ELC2;K7EM56;K7EQJ5;P62841	RS15_HUMAN	RPS15	Small ribosomal subunit protein uS19	32.6844	32.8563	32.7961	32.5882	32.7471	32.6608
	0.333769	0.100587	P62847;P62847-2;P62847-3;P62847-4	A0A2R8Y8A0;A0A2R8Y849;E7ETK0;P62847-2;P62847-3;P62847-4;A0A2R8YD14;P62847	RS24_HUMAN	RPS24	Small ribosomal subunit protein eS24	32.4453	32.0991	32.3871	32.0984	32.2141	32.3172
	0.897894	0.339986	P62851	P62851	RS25_HUMAN	RPS25	Small ribosomal subunit protein eS25	33.1026	33.0841	32.5773	32.5346	32.6601	32.5493
	0.0941848	-0.0403086	P62854	Q5JNZ5;P62854	RS26_HUMAN	RPS26	Small ribosomal subunit protein eS26	32.587	32.6587	33.0705	32.8251	32.7626	32.8495
	0.0409511	-0.00806681	P62857	P62857	RS28_HUMAN	RPS28	Small ribosomal subunit protein eS28	32.6639	32.6146	32.7204	32.7149	32.7513	32.5569
	0.403791	-0.179534	P62861	E9PR30;E9PM49;P62861	RS30_HUMAN	FAU	Ubiquitin-like FUBI-ribosomal protein eS30 fusion protein	32.3914	32.5458	32.9744	32.7096	32.952	32.7887
	0.0108933	0.00672404	P62873	F6UT28;F6X3N5;P62873-2;B1AKQ8;A0A994J6X8;P62873	GBB1_HUMAN	GNB1	Guanine nucleotide-binding protein G(I)/G(S)/G(T) subunit beta-1	25.9313	25.9876	26.0155	26.05	26.2754	25.5889
	0.669161	0.454238	P62877	P62877	RBX1_HUMAN	RBX1	E3 ubiquitin-protein ligase RBX1	22.6064	23.0536	23.2158	22.0108	22.7053	22.7971
	0.108166	-0.0277475	P62879	F6X3N5;P62879-2;E7EP32;B3KVK2;A0A994J3T6;P62873;P62879	GBB2_HUMAN	GNB2	Guanine nucleotide-binding protein G(I)/G(S)/G(T) subunit beta-2	27.5275	27.5944	27.6986	27.5646	27.7906	27.5485
	0.281743	0.0822372	P62888	A0A0B4J213;E5RI99;A0A0C4DH44;P62888	RL30_HUMAN	RPL30	Large ribosomal subunit protein eL30	32.6062	32.5618	32.7122	32.3311	32.6875	32.615
	0.0911936	0.0497322	P62891;Q59GN2	P62891;Q59GN2	R39L5_HUMAN;RL39_HUMAN	RPL39;RPL39P5	Large ribosomal subunit protein eL39	32.809	32.1921	32.3381	32.2997	32.3974	32.4929
	1.3681	0.259261	P62899	P62899-2;P62899-3;C9JU56;B7Z4C8;B7Z4E3;B8ZZK4;H7C2W9;P62899	RL31_HUMAN	RPL31	Large ribosomal subunit protein eL31	32.937	32.7979	32.9053	32.4713	32.6578	32.7333
	0.331126	0.10463	P62906	P62906	RL10A_HUMAN	RPL10A	Large ribosomal subunit protein uL1	32.573	32.6444	32.6902	32.2802	32.6482	32.6654
	0.595178	0.0834579	P62910	F8W727;D3YTB1;P62910	RL32_HUMAN	RPL32	Large ribosomal subunit protein eL32	32.7705	32.722	32.8364	32.5934	32.7098	32.7753
	0.223206	-0.0816816	P62913	Q5VVC8;P62913-2;P62913	RL11_HUMAN	RPL11	Large ribosomal subunit protein uL5	32.7822	33.0044	33.1871	32.9094	33.147	33.1624
	0.0626384	0.0248782	P62917	G3V1A1;E9PKU4;E9PKZ0;P62917	RL8_HUMAN	RPL8	Large ribosomal subunit protein uL2	32.4717	32.6508	32.7357	32.3673	32.693	32.7233
	0.153416	0.100306	P62937	C9J5S7;F8WE65;A0A7I2V5J5;P62937	PPIA_HUMAN	PPIA	Peptidyl-prolyl cis-trans isomerase A	24.3756	24.8062	24.1956	24.0615	24.6269	24.3881
	0.583721	0.163809	P62979	P62979	RS27A_HUMAN	RPS27A	Ubiquitin-ribosomal protein eS31 fusion protein	30.7008	30.4347	30.5347	30.2039	30.441	30.5339
	0.0896624	0.0579516	P62987	M0R2S1;P62987	RL40_HUMAN	UBA52	Ubiquitin-ribosomal protein eL40 fusion protein	29.418	29.6347	29.7795	29.1542	29.672	29.8321
	1.40424	0.317555	P62995	P62995-3;P62995	TRA2B_HUMAN	TRA2B	Transformer-2 protein homolog beta	27.7014	27.638	27.4187	27.2104	27.3912	27.2039
	1.04293	0.222382	P63000-2	J3KSC4;P63000-2;B1AH80;B1AH77;B1AH78;J3QLK0;A0A994J6T1;P15153;P60763;P63000	RAC1_HUMAN	RAC1	Isoform of P63000, Isoform B of Ras-related C3 botulinum toxin substrate 1	25.8803	25.7596	25.8294	25.7561	25.6142	25.4318
	0.172718	-0.0923475	P63010;P63010-2	K7EJ01;A0A087X253;A0A087WU93;A0A087WYD1;A0A087WZQ6;P63010-2;P63010-3;P63010	AP2B1_HUMAN	AP2B1	AP-2 complex subunit beta	22.495	22.4669	21.9736	22.568	22.4516	22.1929
	0.286985	0.0867462	P63092-2;Q5JWF2-2	P63092;P63092-2;P63092-3;P63092-4;Q5JWE9;Q5JWF2-2;A0A804HIH4;A0A590UJY2;A0A590UJS2;A0A590UJQ9;A0A590UK28;A0A590UJF0;A0A0A0MR13;B0AZR9;A0A7I2V5R6;Q5JWF2	GNAS1_HUMAN;GNAS2_HUMAN	GNAS	Isoform of Q5JWF2, Isoform Gnas-2 of Guanine nucleotide-binding protein G(s) subunit alpha isoforms short	25.6748	25.7613	25.5047	25.6804	25.6297	25.3705
	0.44454	0.411901	P63092-3	P63092-3;Q5JWE9;A0A590UJF0	GNAS2_HUMAN	GNAS	Isoform of Q5JWF2, Isoform 3 of Guanine nucleotide-binding protein G(s) subunit alpha isoforms short	21.4208	21.7545	21.9604	22.0241	20.8476	21.0283
	0.526581	-0.0500908	P63092;P63092-4;Q5JWF2	P63092;P63092-4;Q5JWD1;H0Y7E8;A0A590UJS2;A0A590UJQ9;A0A590UJX3;A0A0A0MR13;B0AZR9;A0A7I2V5R6;Q5JWF2	GNAS1_HUMAN;GNAS2_HUMAN	GNAS	Isoform of Q5JWF2, Guanine nucleotide-binding protein G(s) subunit alpha isoforms short	24.1934	24.1387	24.2194	24.2289	24.2959	24.177
	1.20838	0.236638	P63096-2	P63096-2;A0A3B3ITM0;P63096	GNAI1_HUMAN	GNAI1	Isoform of P63096, Isoform 2 of Guanine nucleotide-binding protein G(i) subunit alpha-1	24.3433	24.1979	24.1683	23.8541	24.0465	24.0991
	1.55918	-0.220005	P63104	P63104-2;E7EX29;H0YB80;B7Z2E6;B0AZS6;P63104	1433Z_HUMAN	YWHAZ	14-3-3 protein zeta/delta	23.9413	23.8454	23.8944	24.182	24.1624	23.9968
	0.257279	0.0960217	P63167	P63167;Q96FJ2	DYL1_HUMAN	DYNLL1	Dynein light chain 1, cytoplasmic	24.9039	24.7175	24.6503	24.834	24.4121	24.7375
	0.359118	0.102225	P63173	J3KT73;J3QL01;P63173	RL38_HUMAN	RPL38	Large ribosomal subunit protein eL38	32.3791	32.2584	32.404	32.3333	32.0267	32.3748
	0.521569	0.0366955	P63208	P63208-2;E7ERH2;F8W8N3;E5RJR5;E5RGM3;E5RI56;P63208	SKP1_HUMAN	SKP1	S-phase kinase-associated protein 1	25.7501	25.7922	25.6974	25.7151	25.7315	25.683
	0.968251	-0.160667	P63218	A0A804HLA8;P63218	GBG5_HUMAN	GNG5	Guanine nucleotide-binding protein G(I)/G(S)/G(O) subunit gamma-5	22.6627	22.8305	22.8973	22.9941	22.9894	22.8891
	0.279119	-0.0405057	P63220	Q8WVC2;Q9BYK1;P63220	RS21_HUMAN	RPS21	Small ribosomal subunit protein eS21	32.3451	32.4664	32.4986	32.4075	32.5092	32.515
	0.960161	-0.487893	P63241	C9J7B5;C9J4W5;P63241-2;F8WCJ1;I3L504;I3L397;Q9GZV4;P63241;Q6IS14	IF5A1_HUMAN	EIF5A	Eukaryotic translation initiation factor 5A-1	27.8782	28.0288	28.6009	28.4775	28.731	28.763
	0.0190962	-0.00857417	P63244	J3KPE3;D6RF23;D6REE5;D6RAC2;H0YAF8;H0YAM7;H0Y9P0;H0Y8W2;H0Y8R5;P63244	RACK1_HUMAN	RACK1	Small ribosomal subunit protein RACK1	32.59	32.6193	32.7884	32.4028	32.8003	32.8204
	0.00693388	0.00156021	P63261	J3KT65;A0A2R8Y793;A0A6Q8PFE4;E7EVS6;A0A6Q8PH58;A0A2R8YGF8;C9JZR7;C9JUM1;A0A804GS07;G5E9R0;K7EM38;I3L4N8;I3L3R2;I3L3I0;I3L1U9;P63261;P60709	ACTG_HUMAN	ACTG1	Actin, cytoplasmic 2	32.5727	32.7305	32.7416	32.7297	32.73	32.5804
	0.300609	-0.218716	P63272	D3DTZ5;J3QSB9;P63272	SPT4H_HUMAN	SUPT4H1	Transcription elongation factor SPT4	23.3417	23.2183	24.0991	23.6146	23.7228	23.9777
	0.417743	-0.67443	P63313	P62328;P63313	TYB10_HUMAN	TMSB10	Thymosin beta-10	21.0706	22.7875	21.6751	22.5393	23.3206	21.6966
	0.947583	0.266523	P67809	P16989-2;P16989-3;H0Y449;A0A0D9SEI8;P16989;P67809;Q9Y2T7	YBOX1_HUMAN	YBX1	Y-box-binding protein 1	30.3233	30.2872	30.2958	29.7838	30.0978	30.2252
	1.88507	-0.513378	P67870	N0E472;Q5SRQ6;Q5SRQ3;A0A7I2YQ78;A0A0G2JM12;P67870	CSK2B_HUMAN	CSNK2B	Casein kinase II subunit beta	26.7862	26.7918	26.9344	27.3903	27.5191	27.1433
	0.384818	-0.0650927	P67936	P67936-2;A0A2R8YE05;K7ENT6;K7EPB9;A0A5F9UN72;P67936	TPM4_HUMAN	TPM4	Tropomyosin alpha-4 chain	23.3817	23.5009	23.4868	23.6344	23.5028	23.4275
	0.168424	0.0848827	P68104	Q5JR01;A0A087WV01;A6PW80;A0A087WVQ9;A0A7I2V3H3;A0A7I2V5N4;A0A7I2V659;P68104;Q5VTE0	EF1A1_HUMAN	EEF1A1	Elongation factor 1-alpha 1	30.7297	30.7919	30.3043	30.6822	30.5836	30.3055
	0.68989	0.300684	P68133	F6QUT6;F6UVQ4;F8WB63;C9JFL5;A6NL76;B8ZZJ2;A0A804HKV3;P62736;P68133;P63267;P68032	ACTS_HUMAN	ACTA1	Actin, alpha skeletal muscle	32.0138	32.355	31.814	31.8969	31.863	31.5209
	0.117277	-0.0210292	P68366;P68366-2	A6NHL2-2;Q71U36-2;F5H5D3;P68363-2;P68366-2;P68366;P68363;Q9BQE3;Q71U36;A6NHL2	TBA4A_HUMAN	TUBA4A	Tubulin alpha-4A chain	28.5554	28.4165	28.5524	28.4486	28.5293	28.6095
	0.0874682	0.0220509	P68371	M0R0X0;M0R042;M0R2T4;M0R2D3;M0QY37;M0QY85;M0QX14;M0QYM7;P68371;P04350	TBB4B_HUMAN	TUBB4B	Tubulin beta-4B chain	27.5372	27.3707	27.4059	27.3988	27.5514	27.2975
	2.28503	-0.332381	P68400	A0A2R8Y7T1;A0A2R8Y797;A0A2R8Y3W6;A0A2R8Y5A0;A0A2R8Y4H0;A0A2R8Y4D6;E7EU96;A0A2R8YDY7;A0A2R8YDP2;A0A2R8YD58;A0A2R8YCK2;A0A2R8YFU2;A0A2R8YEW1;A0A2R8YF43;A0A2R8YF47;A0A2R8YEL7;V9GY80;V9GYA2;Q8NEV1;P68400	CSK21_HUMAN	CSNK2A1	Casein kinase II subunit alpha	27.2464	27.1645	27.1392	27.595	27.5304	27.4219
	0.0258796	0.055446	P68431	P68431	H31_HUMAN	H3C12	Histone H3.1	25.2636	25.8517	25.2443	25.147	26.6979	24.3484
	0.0970744	-0.0304902	P69849;Q15155;Q5JPE7;Q5JPE7-2	J3KN36;H3BPS9;A0A0G2JP90;A0A0G2JN29;Q5JPE7-2;Q5JPE7-3;A0A7I2V2Z5;A0A7I2V3P4;A0A7I2V4D7;A0A7I2V4T6;A0A7I2V6B0;Q5JPE7;P69849;Q15155	NOMO1_HUMAN;NOMO2_HUMAN;NOMO3_HUMAN	NOMO1;NOMO2;NOMO3	BOS complex subunit NOMO3	22.2768	22.0629	22.2332	22.1505	22.1107	22.4032
	0.339033	0.135432	P78312;P78312-2	E7EUR8;A0A1B0GVL4;P78312-2;P78312-4;P78312-5;P78312-6;P78312	F193A_HUMAN	FAM193A	Protein FAM193A	21.7292	22.248	21.9775	21.8508	21.7285	21.969
	0.834608	0.0728944	P78316	E9PFK5;P78316-2;P78316	NOP14_HUMAN	NOP14	Nucleolar protein 14	24.0028	23.9681	23.9583	23.8452	23.9754	23.89
	0.463977	-0.246525	P78337	Q99697-2;Q99697-3;D6RFI4;A0A8J9C2I7;D6RBG8;D6R9U1;D6R955;U3KQ81;P78337;Q99697;O75364	PITX1_HUMAN	PITX1	Pituitary homeobox 1	20.7716	20.6892	21.0558	20.7695	21.028	21.4588
	0.372842	0.13115	P78344	D3DQV9;H0Y3P2;P78344-2;E9PKF8;P78344	IF4G2_HUMAN	EIF4G2	Eukaryotic translation initiation factor 4 gamma 2	23.9302	23.5807	23.6515	23.459	23.7899	23.5201
	0.265239	0.176871	P78345	P78345	RPP38_HUMAN	RPP38	Ribonuclease P protein subunit p38	23.7779	23.2666	23.2088	22.8795	23.2921	23.551
	0.614665	-0.152225	P78346;P78346-2	Q5VU10;Q5VU11;P78346-2;P78346	RPP30_HUMAN	RPP30	Ribonuclease P protein subunit p30	23.7203	23.5295	23.8375	23.9714	23.8252	23.7474
	0.59197	0.124463	P78347;P78347-2;P78347-3;P78347-4	C9J6M0;A0A494C1K3;P78347-2;P78347-3;P78347-4;P78347-5;A0A8I5KVB5;P78347	GTF2I_HUMAN	GTF2I	General transcription factor II-I	26.0427	26.1239	25.8995	25.9992	25.923	25.7705
	0.263546	0.122816	P78356	P78356-2;A0A087WT35;P78356	PI42B_HUMAN	PIP4K2B	Phosphatidylinositol 5-phosphate 4-kinase type-2 beta	21.0656	20.6852	20.7271	20.4424	20.9297	20.7375
	0.0696417	-0.0391108	P78362-2	C9J2M4;P78362-2;F8WBW4;H7C5L6;H7C521;A0A994J591;P78362	SRPK2_HUMAN	SRPK2	Isoform of P78362, Isoform 2 of SRSF protein kinase 2	24.7337	24.3359	24.7117	24.3381	24.803	24.7576
	0.604624	-0.351113	P78368	K7EJC0;K7EP38;K7ESB6;P78368	KC1G2_HUMAN	CSNK1G2	Casein kinase I isoform gamma-2	21.1885	21.1946	21.4542	21.5061	22.1028	21.2816
	0.510406	-0.158411	P78371	P78371-2;F8VQ14;F5GWF6;P78371	TCPB_HUMAN	CCT2	T-complex protein 1 subunit beta	23.5855	23.9584	23.7441	23.9202	24.0645	23.7786
	0.796556	0.206187	P78406	B0QZ36;E9PPG9;E9PQ57;P78406	RAE1L_HUMAN	RAE1	mRNA export factor RAE1	23.2136	23.2632	23.3503	22.8502	23.2243	23.134
	0.311563	-0.10892	P78524	P78524	DEN2B_HUMAN	DENND2B	DENN domain-containing protein 2B	20.665	20.8602	20.5244	20.9516	20.8293	20.5956
	0.119484	0.0390116	P78527	P78527-2;A0A8V8TMR1;P78527	PRKDC_HUMAN	PRKDC	DNA-dependent protein kinase catalytic subunit	25.3233	25.2009	24.9636	25.2169	25.1271	25.0268
	0.0286744	-0.00575892	P78549;P78549-2;P78549-3	H3BRL9;H3BPD5;A0A494C106;P78549-2;P78549-3;P78549	NTH_HUMAN	NTHL1	Endonuclease III-like protein 1	22.8626	22.9365	22.99	23.0462	22.8608	22.8994
	0.198393	-0.185558	P78563;P78563-2;P78563-3;P78563-4;P78563-5;P78563-6	P78563-2;P78563-3;P78563-4;P78563-5;P78563-6;A0A994J7T5;A0A994J4V7;P78563	RED1_HUMAN	ADARB1	Double-stranded RNA-specific editase 1	15.5178	15.7263	15.4767	15.2032	16.4097	15.6646
	0.509814	0.337297	P79522-2	P79522-2;P79522	PRR3_HUMAN	PRR3	Isoform of P79522, Isoform 2 of Proline-rich protein 3	23.1912	22.8634	22.8512	22.971	22.8195	22.1034
	0.818307	0.241919	P80723	P80723-2;P80723	BASP1_HUMAN	BASP1	Brain acid soluble protein 1	28.3151	28.1043	28.2055	27.7283	28.1365	28.0343
	0.16054	0.166827	P81605	P81605-2;P81605	DCD_HUMAN	DCD	Dermcidin	26.4584	25.9216	25.4042	25.4177	26.2336	25.6324
	1.0917	-0.14787	P82650	H7C5H3;H7C5L9;H7C5F2;G5E9W7;P82650-2;A0A8I5KQR7;A0A8I5KSY5;A0A8I5KX02;A0A8I5KYF1;A0A7P0MKV3;P82650	RT22_HUMAN	MRPS22	Small ribosomal subunit protein mS22	25.1098	25.2312	25.3072	25.3168	25.4118	25.3632
	0.00716273	0.00226148	P82663	E7EPW2;A0A8Q3WKE1;A0A8Q3WKH6;A0A8Q3WKJ5;A0A8Q3SHU8;P82663-2;P82663-3;P82663	RT25_HUMAN	MRPS25	Small ribosomal subunit protein mS25	25.2413	25.3134	25.5052	25.3721	25.4559	25.2251
	1.18592	-0.496655	P82664	P82664	RT10_HUMAN	MRPS10	Small ribosomal subunit protein uS10m	21.9654	21.6644	22.2092	22.2561	22.4115	22.6614
	0.454016	0.105172	P82673	P82673	RT35_HUMAN	MRPS35	Small ribosomal subunit protein mS35	23.2729	23.147	23.2174	22.9272	23.1574	23.2372
	0.696316	-0.209413	P82675	P82675-2;A0A8Q3WKG3;A0A8Q3WKL2;A0A8Q3SIP9;A0A8Q3SHY8;P82675	RT05_HUMAN	MRPS5	Small ribosomal subunit protein uS5m	24.3983	24.1809	24.6166	24.5402	24.5683	24.7156
	0.151257	0.066171	P82912;P82912-2	P82912-2;P82912-3;P82912	RT11_HUMAN	MRPS11	Small ribosomal subunit protein uS11m	21.8244	21.6756	21.323	21.4071	21.6149	21.6025
	0.0291529	-0.00982793	P82914	P82914	RT15_HUMAN	MRPS15	Small ribosomal subunit protein uS15m	24.0961	24.0133	24.2444	24.2285	24.2086	23.9461
	0.250044	-0.0329946	P82921	P82921	RT21_HUMAN	MRPS21	Small ribosomal subunit protein bS21m	21.721	21.5951	21.5817	21.6107	21.687	21.6991
	0.299002	-0.0669797	P82930	C9JJ19;P82930	RT34_HUMAN	MRPS34	Small ribosomal subunit protein mS34	25.0475	25.0358	24.9682	25.2208	25.1107	24.921
	0.00328755	-0.00246747	P82932	P82932	RT06_HUMAN	MRPS6	Small ribosomal subunit protein bS6m	22.8008	23.0027	22.525	22.5335	22.6217	23.1806
	0.0745724	0.0188739	P82933	P82933	RT09_HUMAN	MRPS9	Small ribosomal subunit protein uS9m	26.3531	26.1661	26.3714	26.2319	26.2051	26.397
	1.45245	-0.172394	P83111	P83111-2;P83111	LACTB_HUMAN	LACTB	Serine beta-lactamase-like protein LACTB, mitochondrial	24.0975	24.0176	24.1775	24.3262	24.223	24.2607
	0.299159	0.247204	P83369	P83369	LSM11_HUMAN	LSM11	U7 snRNA-associated Sm-like protein LSm11	21.7358	20.8815	21.0044	21.3456	20.6532	20.8813
	0.669464	0.194434	P83731	C9JXB8;C9JNW5;A0A994J4A5;P83731	RL24_HUMAN	RPL24	Large ribosomal subunit protein eL24	32.9592	32.9002	32.5799	32.7337	32.5387	32.5836
	0.354456	0.191855	P83881	J3KQN4;H0Y5B4;H7BY91;H7BZ11;H0Y3V9;P83881	RL36A_HUMAN	RPL36A	Large ribosomal subunit protein eL42	31.8926	31.7594	31.5882	31.1435	31.8034	31.7177
	0.350851	-0.259871	P83916	J3KS05;B5MD17;P83916	CBX1_HUMAN	CBX1	Chromobox protein homolog 1	20.1325	19.2088	19.6543	20.2312	19.7564	19.7876
	1.17481	0.578435	P84090	G3V279;P84090	ERH_HUMAN	ERH	Enhancer of rudimentary homolog	29.0317	28.59	28.3148	27.9574	27.9771	28.2666
	1.09437	0.324886	P84095	P84095	RHOG_HUMAN	RHOG	Rho-related GTP-binding protein RhoG	18.9681	19.1493	18.8965	18.4599	18.8619	18.7175
	0.257541	0.068147	P84098	J3KTE4;A0A7I2YQG2;J3QR09;A0A7I2V2L0;A0A7I2V4U6;A0A7I2V512;A0A7I2V638;P84098	RL19_HUMAN	RPL19	Large ribosomal subunit protein eL19	32.5821	32.51	32.5723	32.2819	32.5724	32.6056
	0.460662	0.180424	P84101;P84101-4	P84101-4;P84101	SERF2_HUMAN	SERF2	Small EDRK-rich factor 2	20.6933	20.9856	21.1801	20.6484	20.9539	20.7155
	0.289505	0.213382	P84103;P84103-2	P84103-2;A0A087X2D0;P84103	SRSF3_HUMAN	SRSF3	Serine/arginine-rich splicing factor 3	31.8444	31.1818	30.9543	31.3496	31.0984	30.8924
	0.000554776	-0.000556946	P84243	B4DEB1;A0A590UJJ6;K7EK07;K7EMV3;K7EP01;K7ES00;P84243	H33_HUMAN	H3-3B	Histone H3.3	23.8583	24.7968	24.8616	24.4625	24.4609	24.5951
	2.21555	-0.540981	P85037	P85037-2;U3KQ26;P85037	FOXK1_HUMAN	FOXK1	Forkhead box protein K1	19.8482	19.7327	19.5278	20.2182	20.3232	20.1902
	2.36766	0.423122	P98160	P98160	PGBM_HUMAN	HSPG2	Basement membrane-specific heparan sulfate proteoglycan core protein	21.4473	21.5662	21.3574	21.0969	20.9598	21.0447
	0.90839	0.107394	P98175-5	P98175-2;P98175-3;P98175-4;P98175-5;P52756;P98175	RBM10_HUMAN	RBM10	Isoform of P98175, Isoform 5 of RNA-binding protein 10	23.8226	23.8365	23.6891	23.7183	23.6203	23.6875
	0.64557	0.241824	P98179	P98179	RBM3_HUMAN	RBM3	RNA-binding protein 3	24.5789	24.0497	24.3041	24.0321	24.2092	23.9659
	0.16559	-0.0492649	Q00059	Q00059-2;H7BYN3;Q00059	TFAM_HUMAN	TFAM	Transcription factor A, mitochondrial	26.1047	26.2137	26.1314	25.9887	26.3394	26.2695
	0.243918	0.122922	Q00325-2	F8VWQ0;F8VVM2;Q00325-2	S25A3_HUMAN	SLC25A3	Isoform of Q00325, Isoform B of Solute carrier family 25 member 3	25.158	24.8918	25.0168	24.5335	25.1105	25.0537
	0.11826	-0.0523345	Q00341	H0Y394;A0A024R4E5;H7C2D1;Q00341-2;Q00341	VIGLN_HUMAN	HDLBP	Vigilin	24.0766	24.292	23.814	23.9608	24.2458	24.133
	0.739564	-0.0838197	Q00403	Q00403	TF2B_HUMAN	GTF2B	Transcription initiation factor IIB	23.3854	23.3425	23.2607	23.4032	23.4818	23.355
	1.42475	0.745033	Q00577	Q00577	PURA_HUMAN	PURA	Transcriptional activator protein Pur-alpha	24.8856	25.0013	24.6976	23.6635	24.36	24.326
	0.0627285	0.0433089	Q00587;Q00587-2	Q00587-2;Q00587	BORG5_HUMAN	CDC42EP1	Cdc42 effector protein 1	20.9255	21.1577	21.0129	20.5335	21.1573	21.2754
	0.201282	0.0293706	Q00610;Q00610-2	K7EJJ5;P53675-2;Q00610-2;A0A8V8TRE8;A0A8V8TRF0;A0A8V8TQK1;A0A8V8TQK3;A0A8V8TR47;A0A8V8TQ14;A0A8V8TQ18;A0A087WVQ6;A0A087WX41;P53675;Q00610	CLH1_HUMAN	CLTC	Clathrin heavy chain 1	23.8118	23.9473	23.8717	23.7708	23.8646	23.9073
	1.2114	0.331099	Q00653;Q00653-4	Q00653-3;Q00653-4;Q00653	NFKB2_HUMAN	NFKB2	Nuclear factor NF-kappa-B p100 subunit	23.7769	23.509	23.3391	23.1803	23.2343	23.2171
	0.565384	0.624822	Q00765	E2QRG8;Q00765	REEP5_HUMAN	REEP5	Receptor expression-enhancing protein 5	21.3676	20.8357	20.1787	20.8692	19.8454	19.7929
	0.244388	0.104609	Q00839	Q00839-2;A0A1X7SBS1;A0A1W2PP34;A0A1W2PP35;A0A1W2PPS1;A0A1W2PQ74;A0A1W2PPH7;A0A1W2PPL4;A0A1W2PQL0;A0A1W2PQD4;A0A1W2PRZ7;Q5RI18;A0A994J6V2;Q00839	HNRPU_HUMAN	HNRNPU	Heterogeneous nuclear ribonucleoprotein U	30.3124	29.8703	29.7999	29.9958	29.8485	29.8245
	0.0269542	-0.00330734	Q01081	Q01081-2;Q01081-4;Q01081	U2AF1_HUMAN	U2AF1	Splicing factor U2AF 35 kDa subunit	30.0029	29.88	29.9897	29.9666	29.9354	29.9804
	0.228294	0.0647608	Q01082	Q01082-2;Q01082-3;A0A087WUZ3;Q01082	SPTB2_HUMAN	SPTBN1	Spectrin beta chain, non-erythrocytic 1	23.2452	23.387	23.1363	23.2883	23.2621	23.024
	1.61993	-1.50545	Q01105-2	Q01105-2;Q01105-3;Q01105-4;A0A8J8YYJ1;A0A8I5KS71;A0A0C4DFV9;P0DME0;Q01105	SET_HUMAN	SET	Isoform of Q01105, Isoform 2 of Protein SET	26.136	26.0693	26.6878	27.0533	28.1047	28.2513
	0.16448	0.0604229	Q01130	J3KP15;Q01130-2;J3QL05;Q01130	SRSF2_HUMAN	SRSF2	Serine/arginine-rich splicing factor 2	32.2774	32.1622	32.1701	32.3445	32.1927	31.8912
	0.117757	-0.107784	Q01469	I6L8B7;Q01469	FABP5_HUMAN	FABP5	Fatty acid-binding protein 5	22.2272	21.7708	21.2071	21.6559	21.7227	22.15
	0.286996	0.154558	Q01484	I6L894;D6RHE1;H0Y933;A0A5F9ZH19;A0A5F9ZH30;A0A5F9ZHN5;A0A5F9ZHR8;A0A5F9ZI30;A0A5F9ZI40;A0A5F9ZHS1;A0A5F9ZHT4;A0A5F9ZHT8;A0A5F9ZI46;A0A5F9ZI65;A0A5F9ZGX3;A0A5F9ZGY3;A0A5F9ZGY4;A0A5F9ZGZ5;A0A5F9ZHD2;A0A5F9ZHE4;A0A5F9ZHF7;Q01484	ANK2_HUMAN	ANK2	Ankyrin-2	27.2537	26.7444	26.8577	26.5206	26.8225	27.0491
	0.701751	0.368368	Q01518;Q01518-2	P40123-2;P40123-3;B7Z385;E9PDI2;Q01518-2;P40123;Q01518	CAP1_HUMAN	CAP1	Adenylyl cyclase-associated protein 1	22.1409	21.5535	21.4449	21.3769	21.5045	21.1526
	0.554701	0.501139	Q01628	A0A7P0T9U8;A0A7P0T8W2;A0A7P0TB91;A0A7P0TB46;R4GNG9;C9JQL5;Q01628	IFM3_HUMAN	IFITM3	Interferon-induced transmembrane protein 3	21.3268	21.1397	20.42	19.9005	20.6153	20.8673
	0.93713	0.329333	Q01650	A0A0C4DGL4;Q01650	LAT1_HUMAN	SLC7A5	Large neutral amino acids transporter small subunit 1	27.6451	27.4188	27.2293	27.0972	27.2981	26.91
	0.0510187	0.0241076	Q01658	Q01658	NC2B_HUMAN	DR1	Protein Dr1	23.6034	23.5596	23.1644	23.5469	23.4449	23.2633
	0.401601	0.0761216	Q01780	K7EJ37;Q01780-2;Q01780	EXOSX_HUMAN	EXOSC10	Exosome component 10	24.2885	24.2737	24.2709	24.0969	24.1489	24.3589
	0.108048	-0.0359554	Q01804	Q01804-3;Q01804-5;Q01804	OTUD4_HUMAN	OTUD4	OTU domain-containing protein 4	23.3858	23.1144	23.0059	23.2865	23.161	23.1665
	1.21726	-0.2265	Q01813	H0Y3Y3;B1APP6;A0A8V8TMY4;Q01813-2;A0A7I2V3Z0;Q01813	PFKAP_HUMAN	PFKP	ATP-dependent 6-phosphofructokinase, platelet type	24.9877	24.8712	25.1184	25.1669	25.17	25.3199
	0.251236	0.0577183	Q01831	Q01831-2;Q01831	XPC_HUMAN	XPC	DNA repair protein complementing XP-C cells	23.1425	23.0192	23.2147	22.9275	23.1186	23.1571
	0.283931	0.13541	Q01844;Q01844-3;Q01844-5;Q01844-6	B0QYK0;C9JGE3;A0A0D9SFL3;H7BY36;Q01844-3;Q01844-6;Q01844-2;Q01844-5;Q01844	EWS_HUMAN	EWSR1	RNA-binding protein EWS	31.4619	31.097	30.8668	31.1625	30.9795	30.8775
	0.574359	0.269967	Q01970;Q01970-2	Q01970-2;Q01970	PLCB3_HUMAN	PLCB3	1-phosphatidylinositol 4,5-bisphosphate phosphodiesterase beta-3	22.2881	22.1931	21.8818	22.082	21.9504	21.5208
	0.317831	-0.117137	Q02040	X6RAJ1;Q02040-2;Q02040-3;Q02040	AK17A_HUMAN	AKAP17A	A-kinase anchor protein 17A	22.123	21.9777	22.4402	22.1736	22.3293	22.3893
	0.170557	0.146084	Q02127	I3NI32;Q02127	PYRD_HUMAN	DHODH	Dihydroorotate dehydrogenase (quinone), mitochondrial	20.3821	20.4011	19.5137	19.7793	19.8529	20.2264
	0.221829	0.158371	Q02218	Q02218-2;E9PFG7;E9PCR7;E9PDF2;Q02218	ODO1_HUMAN	OGDH	2-oxoglutarate dehydrogenase complex component E1	23.7709	24.0151	23.9069	24.0175	23.9998	23.2005
	0.140341	-0.0541712	Q02241	A0A2U3TZL8;H7BYN4;Q02241-2;Q02241-3;A0A7I2V5Y5;Q02241	KIF23_HUMAN	KIF23	Kinesin-like protein KIF23	21.9258	22.2767	21.9829	22.259	21.9422	22.1468
	0.410344	0.53154	Q02413	Q02413	DSG1_HUMAN	DSG1	Desmoglein-1	23.1189	24.2538	22.4974	22.8229	23.0609	22.3916
	0.384339	-0.107368	Q02543	M0R1A7;M0R0P7;M0R117;M0R3D6;Q02543	RL18A_HUMAN	RPL18A	Large ribosomal subunit protein eL20	32.6002	32.7467	32.9207	32.7261	32.8918	32.9718
	0.29408	0.184823	Q02790	H0YFG2;Q02790	FKBP4_HUMAN	FKBP4	Peptidyl-prolyl cis-trans isomerase FKBP4	20.3941	20.623	20.3107	20.2147	20.6879	19.8707
	1.04616	0.259574	Q02878	F8VZ45;F8VR69;U3KQR5;Q02878	RL6_HUMAN	RPL6	Large ribosomal subunit protein eL6	33.3424	33.3913	33.0376	32.9312	33.0036	33.0578
	0.728079	0.164352	Q02880-2	A0A8V8TPE3;A0A8V8TP20;A0A8V8TN33;E9PCY5;Q02880-2;Q02880	TOP2B_HUMAN	TOP2B	Isoform of Q02880, Isoform Beta-1 of DNA topoisomerase 2-beta	24.4191	24.3689	24.1767	24.2947	24.1274	24.0495
	1.57006	-0.146249	Q02978	I3L1P8;Q02978	M2OM_HUMAN	SLC25A11	Mitochondrial 2-oxoglutarate/malate carrier protein	21.4218	21.5147	21.4872	21.6749	21.5616	21.6259
	1.5803	-0.203298	Q03001;Q03001-14	Q6P0N6;Q03001-3;Q03001-8;Q03001-9;F6QMI7;E7ETB9;F8W9J4;A0A7P0T890;Q5T0V7;Q03001-13;Q03001-14;E9PHM6;A0A494C1D7;Q03001	DYST_HUMAN	DST	Dystonin	21.6502	21.796	21.6387	21.8972	21.9516	21.846
	0.960296	-0.283786	Q03111	Q03111	ENL_HUMAN	MLLT1	Protein ENL	23.1749	23.221	22.7901	23.3317	23.3892	23.3165
	0.380278	-0.250237	Q03135	Q03135	CAV1_HUMAN	CAV1	Caveolin-1	21.5339	21.0817	21.8672	22.0266	21.7226	21.4844
	1.13894	0.43582	Q03164;Q03164-2;Q03164-3	E9PR05;Q03164-2;Q03164-3;A0A8I5KXR3;A0A3B3ITZ1;Q03164	KMT2A_HUMAN	KMT2A	Histone-lysine N-methyltransferase 2A	21.9308	21.717	21.4428	21.4639	21.0793	21.24
	0.590589	1.04671	Q03169	H0YKR7;H0YLC0;Q03169	TNAP2_HUMAN	TNFAIP2	Tumor necrosis factor alpha-induced protein 2	24.9115	25.1241	24.8541	22.35	24.5591	24.8405
	0.529466	0.298568	Q03405	Q03405-2;M0R1I2;M0R0Y4;M0R0H5;M0R383;M0QYS6;M0QYR6;Q03405	UPAR_HUMAN	PLAUR	Urokinase plasminogen activator surface receptor	21.1121	21.277	20.9243	20.8235	21.189	20.4052
	0.732014	0.0758972	Q03468	P0DP91;A0A7P0T9G4;Q03468	ERCC6_HUMAN	ERCC6	DNA excision repair protein ERCC-6	25.1333	25.1143	24.987	24.9782	25.0109	25.0178
	0.677889	0.327774	Q03518;Q03518-2	A0A140T9T7;Q03518-2;A0A8V8TN61;A0A8V8TNH0;A0A8V8TM76;Q03518	TAP1_HUMAN	TAP1	Antigen peptide transporter 1	21.9191	21.6944	21.6806	21.8348	21.1479	21.3281
	0.761086	-0.354448	Q03519	X5CMH5;A0A140T9S0;A0A0G2JLV0;Q03519-2;A0A8V8TNI0;A0A8V8TNJ0;A0A994J4Y7;A0A087WYD6;E7ENX8;Q03519	TAP2_HUMAN	TAP2	Antigen peptide transporter 2	22.0559	21.6161	22.2632	22.1383	22.4217	22.4387
	0.878015	0.252922	Q03701	Q03701	CEBPZ_HUMAN	CEBPZ	CCAAT/enhancer-binding protein zeta	24.3636	24.2053	24.0111	24.0392	24.0156	23.7666
	0.251476	0.0536753	Q04637-8	E7EX73;E7EUU4;A0A7I2Y1C3;Q04637-3;Q04637-4;Q04637-5;Q04637-6;Q04637-7;Q04637-8;Q04637-9;E9PGM1;Q04637	IF4G1_HUMAN	EIF4G1	Isoform of Q04637, Isoform 8 of Eukaryotic translation initiation factor 4 gamma 1	26.1303	26.1505	25.9892	26.1187	26.0882	25.902
	0.114208	0.0966377	Q04695	K7EPJ9;Q04695	K1C17_HUMAN	KRT17	Keratin, type I cytoskeletal 17	23.706	23.0395	23.3592	22.8475	23.676	23.2913
	0.353293	-0.215891	Q04721	Q04721	NOTC2_HUMAN	NOTCH2	Neurogenic locus notch homolog protein 2	20.7323	20.281	20.5356	21.1303	20.6866	20.3797
	0.20528	0.20513	Q05397;Q05397-5;Q05397-7	E7ESA6;Q05397-7;Q05397-5;H0YBP1;A0A8Q3WLM4;E5RIK4;E5RJP0;E5RFW9;E5RG66;E5RG54;E5RGA6;E5RH48;E5RH01;E5RI72;Q05397	FAK1_HUMAN	PTK2	Focal adhesion kinase 1	20.5066	20.514	20.2771	20.6761	20.5304	19.4758
	0.599147	0.094059	Q05519-2	Q05519-2	SRS11_HUMAN	SRSF11	Isoform of Q05519, Isoform 2 of Serine/arginine-rich splicing factor 11	27.8445	27.8617	27.7616	27.8502	27.6968	27.6386
	1.02774	0.627967	Q05682;Q05682-2;Q05682-3;Q05682-4;Q05682-5;Q05682-6	C9J813;E7EX44;Q05682-2;Q05682-3;Q05682-4;Q05682-5;Q05682-6;C9JEK3;E9PGZ1;Q05682	CALD1_HUMAN	CALD1	Caldesmon	20.9274	20.5906	20.4985	19.5441	20.3859	20.2026
	0.265764	0.321061	Q05901	Q05901	ACHB3_HUMAN	CHRNB3	Neuronal acetylcholine receptor subunit beta-3	26.7327	27.5324	27.4111	26.3051	26.7103	27.6976
	0.44563	0.111998	Q06210;Q06210-2	A0A6I8PTT9;A0A6I8PRN4;Q06210-2;Q06210	GFPT1_HUMAN	GFPT1	Glutamine--fructose-6-phosphate aminotransferase [isomerizing] 1	20.517	20.7331	20.5851	20.4003	20.6735	20.4254
	0.335789	-0.0394268	Q06265;Q06265-2	D6RIY6;D6RA17;H0Y9L5;D6R905;Q06265-3;Q06265-4;Q06265-2;Q06265	EXOS9_HUMAN	EXOSC9	Exosome complex component RRP45	24.0822	24.1065	24.1943	24.2121	24.1899	24.0993
	0.137966	0.0890058	Q06587	Q06587-2;Q06587	RING1_HUMAN	RING1	E3 ubiquitin-protein ligase RING1	21.7649	21.8778	22.0195	21.3637	21.904	22.1275
	0.893047	0.287631	Q06787-6	A8MQB8;G3V0J0;Q06787-2;Q06787-3;Q06787-5;Q06787-4;Q06787-6;Q06787-7;Q06787-8;Q06787-9;Q06787-10;Q06787-11;A0A8I5KS01;A0A8I5KTZ9;A0A8I5KTT6;A0A8I5KUC2;A0A8I5KT56;A0A8I5KWH0;A0A8I5KYA7;A0A8I5KZ21;A0A087WVL8;A0A087WXI3;A0A087WY29;Q06787	FMR1_HUMAN	FMR1	Isoform of Q06787, Isoform 5 of Fragile X messenger ribonucleoprotein 1	26.8431	26.5774	26.3944	26.4197	26.3604	26.1719
	0.323491	0.285732	Q06787-9	Q06787-3;Q06787-5;Q06787-8;Q06787-9;A0A8I5KS01;A0A8I5KTT6;Q06787	FMR1_HUMAN	FMR1	Isoform of Q06787, Isoform 9 of Fragile X messenger ribonucleoprotein 1	26.3972	25.9969	25.9676	26.4559	25.7424	25.3062
	0.271323	0.172371	Q06830	A0A0A0MSI0;Q06830	PRDX1_HUMAN	PRDX1	Peroxiredoxin-1	24.857	24.6648	24.0978	24.5488	24.3945	24.1591
	0.979796	0.223413	Q07020	A0A075B7A0;H0YHA7;Q07020-2;F8VYV2;G3V203;J3QQ67;Q07020	RL18_HUMAN	RPL18	Large ribosomal subunit protein eL18	32.991	32.8653	32.9504	32.5141	32.838	32.7843
	0.134914	0.0659955	Q07021	I3L3Q7;I3L3B0;Q07021	C1QBP_HUMAN	C1QBP	Complement component 1 Q subcomponent-binding protein, mitochondrial	22.3598	22.8187	22.3033	22.2801	22.4659	22.5378
	0.440959	0.124736	Q07065	Q07065	CKAP4_HUMAN	CKAP4	Cytoskeleton-associated protein 4	24.1824	24.077	23.9147	24.0816	23.9569	23.7615
	0.349473	0.102374	Q07157;Q07157-2	Q07157-2;G3V1L9;H0Y3R8;A0A0G2JNH2;G5E9E7;A0A087X0K9;A0A7I2V5U5;Q07157	ZO1_HUMAN	TJP1	Tight junction protein ZO-1	23.4707	23.5616	23.2625	23.1665	23.3792	23.4419
	0.259277	0.159966	Q07666	O75525-2;A0A6Q8PGH5;Q07666-2;Q07666-3;A0A994J7I5;Q07666;O75525;Q5VWX1	KHDR1_HUMAN	KHDRBS1	KH domain-containing, RNA-binding, signal transduction-associated protein 1	27.404	27.1121	26.6936	27.1089	26.965	26.6559
	0.168073	0.118725	Q07866;Q07866-10;Q07866-2;Q07866-3;Q07866-4;Q07866-5;Q07866-6;Q07866-7;Q07866-8;Q07866-9	F8W6L3;G3V5R9;G3V3H3;G3V2E7;G5E9S8;Q07866-2;Q07866-3;Q07866-4;Q07866-5;Q07866-6;Q07866-7;Q07866-8;Q07866-9;Q07866-10;E7EVH7;Q07866	KLC1_HUMAN	KLC1	Kinesin light chain 1	21.9495	22.0255	21.1917	21.5747	21.6167	21.619
	0.44737	0.156626	Q07955	J3KSW7;J3KTL2;Q07955-2;Q07955-3;J3QQV5;Q07955	SRSF1_HUMAN	SRSF1	Serine/arginine-rich splicing factor 1	29.2378	28.8557	28.7848	28.905	28.7803	28.7231
	0.177273	0.120909	Q07973;Q07973-2	Q07973-2;Q07973	CP24A_HUMAN	CYP24A1	1,25-dihydroxyvitamin D(3) 24-hydroxylase, mitochondrial	26.0677	25.9369	26.4598	25.6229	26.26	26.2188
	1.27299	0.376088	Q08170	Q08170	SRSF4_HUMAN	SRSF4	Serine/arginine-rich splicing factor 4	26.2694	26.1014	26.0869	25.5392	25.8235	25.9667
	0.109602	0.106983	Q08188	A0A494C0J7;Q08188	TGM3_HUMAN	TGM3	Protein-glutamine gamma-glutamyltransferase E	20.8283	21.3685	20.6485	21.3481	20.7904	20.3858
	0.0252095	0.00874583	Q08211	Q08211	DHX9_HUMAN	DHX9	ATP-dependent RNA helicase A	25.8778	25.8738	25.6766	25.9888	25.6798	25.7335
	0.218877	0.319429	Q08554;Q08554-2	Q08554-2;Q08554	DSC1_HUMAN	DSC1	Desmocollin-1	22.6933	23.8353	22.3014	22.9322	22.9823	21.9571
	1.10169	0.159447	Q08945	Q08945	SSRP1_HUMAN	SSRP1	FACT complex subunit SSRP1	30.4835	30.396	30.3423	30.2206	30.3523	30.1706
	0.386126	0.116473	Q08AD1;Q08AD1-2;Q08AD1-3	Q08AD1-2;Q08AD1-3;Q08AD1	CAMP2_HUMAN	CAMSAP2	Calmodulin-regulated spectrin-associated protein 2	23.3316	23.3626	23.2042	23.0915	23.0414	23.416
	0.17034	-0.0522359	Q08AE8;Q08AE8-2	Q08AE8-2;Q08AE8	SPIR1_HUMAN	SPIRE1	Protein spire homolog 1	19.3237	19.1734	19.4717	19.4566	19.4489	19.2201
	0.0288165	-0.00846036	Q08J23	Q08J23-2;Q08J23-3;Q08J23	NSUN2_HUMAN	NSUN2	RNA cytosine C(5)-methyltransferase NSUN2	27.1299	27.2676	27.1753	27.3502	27.209	27.039
	0.347725	0.134307	Q09028;Q09028-3	Q09028-2;Q09028-3;Q09028-4;Q09028	RBBP4_HUMAN	RBBP4	Histone-binding protein RBBP4	23.7946	23.9319	23.4228	23.5045	23.6766	23.5652
	0.067178	-0.0365302	Q09161	Q09161	NCBP1_HUMAN	NCBP1	Nuclear cap-binding protein subunit 1	23.4227	23.3468	23.1875	23.0106	23.4621	23.5939
	0.00669512	0.00447019	Q09472	A0A0U1RR87;A0A994J6T4;A0A669KB12;Q09472	EP300_HUMAN	EP300	Histone acetyltransferase p300	20.726	20.7915	20.2956	20.887	20.358	20.5547
	0.0483849	-0.0160141	Q09666	Q09666	AHNK_HUMAN	AHNAK	Neuroblast differentiation-associated protein AHNAK	27.5225	27.5955	27.3835	27.6887	27.4995	27.3613
	0.213583	-0.964312	Q0P6H9	H3BVF7;Q0P6H9	TMM62_HUMAN	TMEM62	Transmembrane protein 62	25.8576	19.9733	23.9065	24.7599	23.8414	24.029
	0.271672	-0.053791	Q0VDF9	Q0VDF9	HSP7E_HUMAN	HSPA14	Heat shock 70 kDa protein 14	22.5116	22.7139	22.4775	22.6708	22.6239	22.5697
	0.604117	0.568386	Q0ZGT2;Q0ZGT2-4	H7BXY5;Q0ZGT2-2;Q0ZGT2-3;Q0ZGT2-4;Q0ZGT2	NEXN_HUMAN	NEXN	Nexilin	23.0849	22.7403	22.6874	23.052	21.714	22.0414
	0.241875	0.145281	Q10471	Q10471	GALT2_HUMAN	GALNT2	Polypeptide N-acetylgalactosaminyltransferase 2	25.8798	25.1945	25.2296	25.4361	25.274	25.158
	0.274514	0.197837	Q10567-3	Q10567-2;Q10567-3;Q10567-4;Q10567	AP1B1_HUMAN	AP1B1	Isoform of Q10567, Isoform C of AP-1 complex subunit beta-1	20.9692	21.2511	20.663	21.0959	20.8821	20.3117
	0.0121258	-0.00757408	Q10570	A0A087X101;Q10570	CPSF1_HUMAN	CPSF1	Cleavage and polyadenylation specificity factor subunit 1	22.7873	22.2375	22.2133	22.589	22.306	22.3658
	0.751804	0.65812	Q10589;Q10589-2	Q10589-2;Q10589	BST2_HUMAN	BST2	Bone marrow stromal antigen 2	22.1869	22.6505	21.9567	22.2873	21.3795	21.153
	0.0704689	-0.0620581	Q12768	Q12768	WASC5_HUMAN	WASHC5	WASH complex subunit 5	21.4734	21.4413	21.2602	22.0205	21.3455	20.9951
	0.531439	0.285599	Q12769	A0A8V8NBT1;G3V198;Q12769-2;E9PSI3;E9PR16;A0A8Q3WK58;Q12769	NU160_HUMAN	NUP160	Nuclear pore complex protein Nup160	21.7672	21.6766	21.766	21.8109	21.0097	21.5324
	0.157188	-0.10409	Q12774	A0A2R8YF49;H0Y895;Q12774-2;Q12774;A0A2R8YFR7	ARHG5_HUMAN	ARHGEF5	Rho guanine nucleotide exchange factor 5	18.6007	18.869	18.9978	19.1229	18.4898	19.1671
	0.0753411	0.0131397	Q12788	J3KNP2;Q12788	TBL3_HUMAN	TBL3	Transducin beta-like protein 3	24.2252	24.277	24.3554	24.1869	24.2776	24.3537
	0.682939	0.076704	Q12789	Q12789-3;Q12789	TF3C1_HUMAN	GTF3C1	General transcription factor 3C polypeptide 1	22.4745	22.3108	22.3949	22.34	22.2784	22.3318
	0.683065	0.310315	Q12792	Q12792-3;Q12792-4;F8VS81;Q12792	TWF1_HUMAN	TWF1	Twinfilin-1	21.4074	21.2207	20.8275	20.6103	20.9402	20.9742
	0.374895	0.172693	Q12797;Q12797-10	Q12797-10;Q12797	ASPH_HUMAN	ASPH	Aspartyl/asparaginyl beta-hydroxylase	26.7945	26.4893	26.2059	26.5004	26.2789	26.1922
	0.274991	-0.272806	Q12800	Q9NZI7-4;C9JWL3;F8VX55;F8VWL0;Q12800-2;Q12800-3;Q12800-4;Q12800;Q9NZI7	TFCP2_HUMAN	TFCP2	Alpha-globin transcription factor CP2	22.2405	22.4844	21.8579	23.1708	22.0479	22.1826
	0.132106	-0.0271791	Q12802;Q12802-2;Q12802-4	A8MYJ1;Q12802-2;Q12802-4;A0A087WTD7;A0A087WY36;Q12802	AKP13_HUMAN	AKAP13	A-kinase anchor protein 13	20.5347	20.5673	20.6	20.7226	20.5923	20.4686
	0.376794	0.159297	Q12824;Q12824-2	A0A0G2JRV3;G5E975;Q12824-2;Q12824	SNF5_HUMAN	SMARCB1	SWI/SNF-related matrix-associated actin-dependent regulator of chromatin subfamily B member 1	21.0662	20.7633	20.6183	20.4198	20.7656	20.7845
	0.338953	0.114644	Q12830;Q12830-2;Q12830-4	Q12830-2;Q12830-4;F5GXF5;J3QQK4;Q12830	BPTF_HUMAN	BPTF	Nucleosome-remodeling factor subunit BPTF	20.8668	20.8368	20.613	20.4385	20.8253	20.7089
	0.00936976	0.00393804	Q12834	Q12834	CDC20_HUMAN	CDC20	Cell division cycle protein 20 homolog	21.3777	21.6706	21.5151	21.3179	21.6953	21.5385
	0.593478	-0.371772	Q12849;Q12849-5	Q12849-5;H0YAK1;H0Y8R1;Q12849	GRSF1_HUMAN	GRSF1	G-rich sequence factor 1	21.9138	21.7524	22.543	22.1778	22.6659	22.4808
	0.626799	0.347513	Q12857;Q12857-4	Q12857-2;Q12857-3;Q12857-4;A0A590UK38;A0A590UJU2;A0A590UK09;A0A8V8TQG7;A0A8V8TQI3;A0A8V8TQV0;A0A8V8TPG7;A0A8V8TPN0;A0A8V8TP49;B1AKN5;B1AKN6;B1AKN7;B1AKN8;S4R3K5;S4R3W2;Q12857	NFIA_HUMAN	NFIA	Nuclear factor 1 A-type	22.1072	22.2304	22.1513	21.3398	22.1683	21.9383
	0.805629	0.0765654	Q12872;Q12872-2	Q12872-2;Q12872	SFSWA_HUMAN	SFSWAP	Splicing factor, suppressor of white-apricot homolog	23.761	23.7552	23.652	23.6098	23.6321	23.6967
	0.0683115	-0.008859	Q12873;Q12873-3	A0A8V8TR54;Q12873-2;Q12873-3;Q12873	CHD3_HUMAN	CHD3	Chromodomain-helicase-DNA-binding protein 3	24.2582	24.1539	24.1796	24.173	24.2715	24.1739
	0.971872	0.136891	Q12874	Q12874	SF3A3_HUMAN	SF3A3	Splicing factor 3A subunit 3	23.7781	23.6639	23.731	23.4801	23.6076	23.6746
	0.208486	0.0872053	Q12894	Q12894	IFRD2_HUMAN	IFRD2	Interferon-related developmental regulator 2	25.9785	25.928	26.0717	25.7574	26.2181	25.7411
	1.15393	-0.127069	Q12899	Q12899	TRI26_HUMAN	TRIM26	Tripartite motif-containing protein 26	28.5047	28.5409	28.6687	28.7121	28.6698	28.7136
	1.5259	-0.119469	Q12904	A0A8C8MUD1;A0A8C8KIA0;Q12904-2;A0A804HJ47;A0A5F9ZHC5;Q12904	AIMP1_HUMAN	AIMP1	Aminoacyl tRNA synthase complex-interacting multifunctional protein 1	24.2972	24.3839	24.3133	24.4496	24.4092	24.494
	0.298844	0.117219	Q12905	B4DY09;Q12905	ILF2_HUMAN	ILF2	Interleukin enhancer-binding factor 2	27.4077	27.2454	27.1632	27.4276	27.0878	26.9492
	0.622414	0.193313	Q12906-7	Q12906-2;Q12906-3;Q12906-4;Q12906-5;Q12906-6;Q12906-7;Q96SI9-2;Q96SI9;Q12906	ILF3_HUMAN	ILF3	Isoform of Q12906, Isoform 7 of Interleukin enhancer-binding factor 3	27.6783	27.4771	27.2291	27.3532	27.2753	27.1759
	0.133289	-0.127562	Q12931;Q12931-2	Q12931-2;I3L2D5;I3L239;I3L0K7;Q12931	TRAP1_HUMAN	TRAP1	Heat shock protein 75 kDa, mitochondrial	24.5991	25.1317	24.454	25.0588	24.2913	25.2174
	0.101185	0.0770404	Q12948	Q12948	FOXC1_HUMAN	FOXC1	Forkhead box protein C1	21.6778	22.0691	21.7075	21.2615	21.914	22.0477
	0.216824	-0.0666612	Q12962	A0A8I5KQU8;Q12962	TAF10_HUMAN	TAF10	Transcription initiation factor TFIID subunit 10	20.7334	20.8561	21.0831	21.0451	20.8383	20.9891
	0.465362	0.0701962	Q12965	H0YNQ8;Q12965	MYO1E_HUMAN	MYO1E	Unconventional myosin-Ie	27.2689	27.393	27.2192	27.3015	27.1983	27.1706
	1.68292	0.161692	Q12986	Q12986-2;Q12986-3;Q12986	NFX1_HUMAN	NFX1	Transcriptional repressor NF-X1	25.813	25.7878	25.7357	25.6912	25.5731	25.5871
	0.330243	1.12828	Q13011	Q13011	ECH1_HUMAN	ECH1	Delta(3,5)-Delta(2,4)-dienoyl-CoA isomerase, mitochondrial	18.3338	20.0182	19.3598	15.5595	19.9682	18.7993
	1.09316	0.518513	Q13017;Q13017-2	Q13017-2;Q13017	RHG05_HUMAN	ARHGAP5	Rho GTPase-activating protein 5	20.3254	20.5154	20.3614	20.2927	19.7895	19.5644
	0.358891	-0.557576	Q13023;Q13023-2	G3V3H7;Q13023-2;Q13023	AKAP6_HUMAN	AKAP6	A-kinase anchor protein 6	25.8142	25.0352	26.1941	25.1391	26.7542	26.8229
	0.518163	-0.333562	Q13042;Q13042-2;Q13042-3	Q13042-2;Q13042-3;Q13042-4;Q5T8C6;A0A3B3ISD2;Q13042	CDC16_HUMAN	CDC16	Cell division cycle protein 16 homolog	21.4972	22.0459	22.2935	21.9662	22.4256	22.4455
	0.105064	-0.0314274	Q13045	Q13045-2;Q13045-3;Q13045	FLII_HUMAN	FLII	Protein flightless-1 homolog	23.6803	23.8333	23.9481	23.8333	23.99	23.7327
	0.590165	0.239936	Q13045-2	J3KS54;Q13045-2	FLII_HUMAN	FLII	Isoform of Q13045, Isoform 2 of Protein flightless-1 homolog	19.997	20.2843	19.9766	19.9238	20.0616	19.5526
	1.13413	0.741793	Q13084	Q4TT37;A2IDC6;A2IDC7;Q13084	RM28_HUMAN	MRPL28	Large ribosomal subunit protein bL28m	23.8503	23.7065	23.1771	23.1119	23.0164	22.3803
	0.353896	-0.365334	Q13111	Q13111-2;Q13111-3;Q13111	CAF1A_HUMAN	CHAF1A	Chromatin assembly factor 1 subunit A	21.1049	20.9755	20.9335	20.9516	20.936	22.2222
	1.04552	0.351368	Q13112	Q13112	CAF1B_HUMAN	CHAF1B	Chromatin assembly factor 1 subunit B	20.7319	20.5757	20.6867	20.6141	20.1407	20.1854
	0.473774	-0.305457	Q13118;Q13118-2	Q13118-2;Q13118	KLF10_HUMAN	KLF10	Krueppel-like factor 10	22.406	22.456	22.7563	23.326	22.7621	22.4465
	0.508148	-0.0602633	Q13123	Q13123	RED_HUMAN	IK	Protein Red	23.4051	23.4597	23.3434	23.5421	23.4274	23.4195
	0.178555	-0.0625846	Q13131;Q13131-2	Q13131-2;Q13131	AAPK1_HUMAN	PRKAA1	5'-AMP-activated protein kinase catalytic subunit alpha-1	21.1091	20.8762	20.7479	21.0969	20.8211	21.003
	0.214314	0.0597884	Q13136	A0A2R8Y7R9;Q13136-2;Q13136	LIPA1_HUMAN	PPFIA1	Liprin-alpha-1	20.8949	21.1906	21.0218	21.1077	20.9245	20.8957
	1.04465	-0.192468	Q13144	A0A3B3IUB1;Q13144	EI2BE_HUMAN	EIF2B5	Translation initiation factor eIF-2B subunit epsilon	23.3941	23.2486	23.3933	23.4122	23.6608	23.5404
	0.199616	0.0940723	Q13148	K7EJ99;G3V162;A0A0A0MSV7;A0A0A0N0M3;B1AKP7;K7EJM5;K7EN94;A0A087X260;A0A087WX29;A0A087WYY0;Q13148	TADBP_HUMAN	TARDBP	TAR DNA-binding protein 43	22.9549	22.6928	22.4533	22.8222	22.4684	22.5282
	0.379145	0.104326	Q13151	Q13151	ROA0_HUMAN	HNRNPA0	Heterogeneous nuclear ribonucleoprotein A0	25.2227	25.2088	24.9377	25.1512	24.9855	24.9195
	0.963895	-0.258689	Q13155	A8MU58;Q13155-2;Q13155	AIMP2_HUMAN	AIMP2	Aminoacyl tRNA synthase complex-interacting multifunctional protein 2	24.5033	24.6467	24.7664	24.7009	25.0284	24.9632
	0.608217	0.206931	Q13155-2	Q13155-2	AIMP2_HUMAN	AIMP2	Isoform of Q13155, Isoform 2 of Aminoacyl tRNA synthase complex-interacting multifunctional protein 2	21.3619	21.1369	21.3275	20.8201	21.0986	21.2868
	0.0757668	-0.0312195	Q13177	Q13177	PAK2_HUMAN	PAK2	Serine/threonine-protein kinase PAK 2	18.5819	18.9775	18.6771	18.6133	18.8758	18.841
	0.674047	-0.0863902	Q13185	Q13185	CBX3_HUMAN	CBX3	Chromobox protein homolog 3	24.0223	24.0095	24.0769	24.2016	24.1479	24.0183
	0.64162	0.192364	Q13188;Q13188-2	Q13188-2;A0A087WZ06;E5RFQ9;Q13188	STK3_HUMAN	STK3	Serine/threonine-protein kinase 3	20.9331	20.6997	21.0502	20.5749	20.8703	20.6606
	0.0553772	-0.0348657	Q13200	Q13200-2;Q13200-3;Q13200	PSMD2_HUMAN	PSMD2	26S proteasome non-ATPase regulatory subunit 2	22.2288	22.2626	22.3254	21.8769	22.503	22.5415
	0.104926	0.0178553	Q13206	E9PIF2;A0A3B3ISR7;A0A8I5KPM1;A0A8I5KQZ1;A0A8I5KUU7;A0A8I5KXY1;Q13206	DDX10_HUMAN	DDX10	Probable ATP-dependent RNA helicase DDX10	26.7442	26.8678	26.7736	26.8746	26.7266	26.7307
	0.324065	0.0931988	Q13214;Q13214-2	Q13214-2;A0A0C4DGV8;Q13214	SEM3B_HUMAN	SEMA3B	Semaphorin-3B	23.8592	23.6509	23.4796	23.6569	23.5324	23.5207
	1.12393	0.16048	Q13242	Q13242	SRSF9_HUMAN	SRSF9	Serine/arginine-rich splicing factor 9	24.8638	24.8254	24.948	24.7601	24.7889	24.6067
	0.977429	0.116222	Q13243	B4DUA4;B4DJK0;G3V5K8;Q13243-2;Q13243-3;Q13243	SRSF5_HUMAN	SRSF5	Serine/arginine-rich splicing factor 5	29.0037	28.834	28.879	28.8114	28.8132	28.7434
	0.224225	0.00836309	Q13247-3	Q13247-2;Q13247-3;A0A0D9SEM4;A0A590UJK4;A0A590UJP7;A0A590UK01;A0A590UK80;Q13247;Q08170	SRSF6_HUMAN	SRSF6	Isoform of Q13247, Isoform SRP55-3 of Serine/arginine-rich splicing factor 6	30.9253	30.9209	30.9003	30.9155	30.8828	30.9231
	0.517598	0.616246	Q13257	Q13257	MD2L1_HUMAN	MAD2L1	Mitotic spindle assembly checkpoint protein MAD2A	20.9916	20.0121	19.5066	19.4967	20.0793	19.0856
	0.54446	0.112276	Q13263	Q13263-2;Q13263	TIF1B_HUMAN	TRIM28	Transcription intermediary factor 1-beta	24.6464	24.6689	24.4486	24.5915	24.4312	24.4044
	0.23795	-0.113262	Q13283	A0A7P0P2U7;A0A7I2YQN9;A0A7I2YQU8;A0A7I2V548;A0A7I2V5M7;Q13283	G3BP1_HUMAN	G3BP1	Ras GTPase-activating protein-binding protein 1	27.5145	27.3545	26.9717	27.5751	27.2497	27.3558
	0.0913268	0.0371183	Q13310-3	H0YEU6;H0Y5F5;Q13310-2;Q13310-3;B1ANR0;A0A7I2V4L7;A0A7I2V598;A0A7I2V5W9;Q13310	PABP4_HUMAN	PABPC4	Isoform of Q13310, Isoform 3 of Polyadenylate-binding protein 4	26.5595	26.5877	26.3849	26.6823	26.5041	26.2344
	0.549694	0.253176	Q13315	Q13315	ATM_HUMAN	ATM	Serine-protein kinase ATM	20.4041	20.6972	21.083	20.5537	20.3719	20.4991
	0.458391	0.0603021	Q13347	A0A7P0MRT9;Q5TFK1;A0A7I2YQF8;A0A7I2YQN1;A0A7I2YQI6;A0A7I2YQI2;A0A7I2YQU2;A0A7I2YQP9;A0A7I2YQX4;A0A7I2V2M3;A0A7I2V391;A0A7I2V3K6;A0A7I2V3T4;A0A7I2V3N2;A0A7I2V3U3;A0A7I2V4C2;A0A7I2V4S8;A0A7I2V5E4;A0A7I2V607;A0A7I2V613;A0A7I2V5V8;A0A7I2V685;A0A7I2V640;Q13347	EIF3I_HUMAN	EIF3I	Eukaryotic translation initiation factor 3 subunit I	28.9129	28.8802	29.0366	28.8922	28.9312	28.8254
	0.416102	0.374022	Q13356;Q13356-2	A0A7P0T8E8;A0A7P0T843;A0A7P0TBL3;A0A7P0TAH4;A0A7P0TB19;A0A7P0TA15;Q13356-2;A0A7P0Z4K4;Q13356	PPIL2_HUMAN	PPIL2	RING-type E3 ubiquitin-protein ligase PPIL2	18.7834	17.6077	18.0746	17.4376	17.9428	17.9633
	0.179972	-0.112027	Q13370;Q13370-2	Q13370-2;Q13370	PDE3B_HUMAN	PDE3B	cGMP-inhibited 3',5'-cyclic phosphodiesterase 3B	23.4484	22.8716	23.1094	22.924	23.4641	23.3774
	0.116047	-0.053798	Q13393;Q13393-2	Q13393-2;Q13393-4;Q13393	PLD1_HUMAN	PLD1	Phospholipase D1	22.2145	22.0323	21.9135	22.3914	22.0053	21.9249
	0.29739	-0.341541	Q13395	Q13395	TARB1_HUMAN	TARBP1	Probable methyltransferase TARBP1	21.1137	20.932	19.9858	20.671	20.7522	21.633
	0.108879	-0.035422	Q13405	H0YDP7;Q13405	RM49_HUMAN	MRPL49	Large ribosomal subunit protein mL49	23.2814	23.1201	23.2997	23.2327	23.1121	23.4627
	0.897079	0.112772	Q13409;Q13409-2;Q13409-3;Q13409-5;Q13409-6;Q13409-7	Q13409-2;Q13409-3;Q13409-5;Q13409-6;Q13409-7;Q13409	DC1I2_HUMAN	DYNC1I2	Cytoplasmic dynein 1 intermediate chain 2	21.7429	21.5911	21.6273	21.4835	21.5303	21.6091
	0.0181191	0.00290998	Q13415	Q13415	ORC1_HUMAN	ORC1	Origin recognition complex subunit 1	22.2123	22.2795	22.2135	22.2727	22.1356	22.2884
	0.123309	-0.0356471	Q13416	B8ZZ80;Q13416	ORC2_HUMAN	ORC2	Origin recognition complex subunit 2	22.3761	22.2863	22.282	22.4934	22.4029	22.1551
	0.845081	-0.274211	Q13418	A0A0A0MTH3;Q13418	ILK_HUMAN	ILK	Integrin-linked protein kinase	22.2533	22.0991	22.0772	22.5065	22.6029	22.1428
	0.0241924	0.0330544	Q13421-2;Q13421-3;Q13421-4	H3BUX1;H3BMA1;Q13421-2;Q13421-3;Q13421-4;Q13421	MSLN_HUMAN	MSLN	Isoform of Q13421, Isoform 3 of Mesothelin	21.8111	21.8	21.7592	22.0428	22.3657	20.8627
	0.195673	0.0562878	Q13427	C9J679;Q13427-2;C9JN15;E9PG73;A0A7I2V4W3;A0A7I2V5Q5;A0A7I2V629;Q13427	PPIG_HUMAN	PPIG	Peptidyl-prolyl cis-trans isomerase G	24.1128	23.9169	23.9013	24.0899	23.8008	23.8714
	1.80834	-0.978874	Q13428-3	Q13428-2;Q13428-3;Q13428-4;Q13428-5;Q13428-6;Q13428-7;Q13428-8;E7ETY2;H0Y8Y7;A0A6I8PRA0;A0A3B3IS06;Q13428	TCOF_HUMAN	TCOF1	Isoform of Q13428, Isoform 3 of Treacle protein	24.9949	25.1683	25.1802	25.6248	26.3097	26.3455
	3.17051	-1.32198	Q13428-6	Q13428-2;Q13428-4;Q13428-6;Q13428	TCOF_HUMAN	TCOF1	Isoform of Q13428, Isoform 6 of Treacle protein	21.161	21.2339	21.5538	22.5033	22.7244	22.687
	0.136544	0.0269693	Q13435	H0YEX5;E9PPJ0;Q13435	SF3B2_HUMAN	SF3B2	Splicing factor 3B subunit 2	26.4704	26.4757	26.5044	26.5659	26.4833	26.3204
	1.85733	-0.422266	Q13442	Q13442	HAP28_HUMAN	PDAP1	28 kDa heat- and acid-stable phosphoprotein	26.0326	26.214	26.3497	26.7036	26.5671	26.5924
	0.339723	0.0949599	Q13459;Q13459-2	M0R0P8;M0R300;Q13459-2;Q13459	MYO9B_HUMAN	MYO9B	Unconventional myosin-IXb	23.3294	23.0642	22.95	22.9773	23.0696	23.0118
	0.219323	-0.13294	Q13470-2	Q13470-2;Q13470	TNK1_HUMAN	TNK1	Isoform of Q13470, Isoform 2 of Non-receptor tyrosine-protein kinase TNK1	22.9399	22.4945	22.2358	22.8563	22.4664	22.7463
	2.26845	1.09206	Q13501	C9J6J8;D6RBF1;E3W990;E7EMC7;Q13501	SQSTM_HUMAN	SQSTM1	Sequestosome-1	26.0583	26.3865	26.3437	24.8372	25.2766	25.3986
	0.845955	-0.337416	Q13509	G3V2A3;Q13509-2;A0A0B4J269;Q13509	TBB3_HUMAN	TUBB3	Tubulin beta-3 chain	22.0931	22.0818	22.0216	22.7545	22.1338	22.3205
	1.47612	0.110652	Q13523	H0YDJ3;Q13523	PRP4B_HUMAN	PRPF4B	Serine/threonine-protein kinase PRP4 homolog	23.5833	23.6293	23.6272	23.4654	23.4775	23.5649
	0.0597558	0.0420386	Q13535	Q13535-2;Q13535-3;A0A590UJ01;Q13535	ATR_HUMAN	ATR	Serine/threonine-protein kinase ATR	22.3551	21.9751	21.9875	21.7753	21.9451	22.4712
	0.24893	0.0459868	Q13547	Q13547	HDAC1_HUMAN	HDAC1	Histone deacetylase 1	22.7695	22.7537	22.5936	22.6261	22.6005	22.7522
	0.280227	0.0661297	Q13555;Q13555-10;Q13555-2;Q13555-3;Q13555-4;Q13555-7;Q13555-8;Q13555-9	Q8WU40;A0A804CJ50;H0Y6G2;Q5SWX3;Q13555-2;Q13555-3;Q13555-4;Q13555-5;Q13555-6;Q13555-7;Q13555-8;Q13555-9;A0A8V8TQ77;Q13555-10;Q13555-11;A0A2Q3DQE3;Q13555	KCC2G_HUMAN	CAMK2G	Calcium/calmodulin-dependent protein kinase type II subunit gamma	23.1867	23.3489	23.2163	23.3405	23.0699	23.1431
	0.63984	0.0719102	Q13573	G3V4X8;G3V3A4;Q13573	SNW1_HUMAN	SNW1	SNW domain-containing protein 1	24.806	24.8445	24.694	24.7556	24.6911	24.6821
	0.134555	0.0399837	Q13574;Q13574-1;Q13574-3;Q13574-4;Q13574-5;Q13574-6;Q13574-7	Q13574-1;Q13574-3;Q13574-4;Q13574-5;Q13574-6;Q13574-7;E9PNL8;Q13574	DGKZ_HUMAN	DGKZ	Diacylglycerol kinase zeta	20.9499	20.8767	20.7508	20.9942	20.7852	20.6781
	1.02616	-0.590123	Q13576	D6R939;Q13576	IQGA2_HUMAN	IQGAP2	Ras GTPase-activating-like protein IQGAP2	18.4505	18.9469	19.1422	19.7848	19.237	19.2881
	0.182804	-0.0922724	Q13595;Q13595-3;Q13595-4	Q13595-2;Q13595-3;Q13595-4;Q13595	TRA2A_HUMAN	TRA2A	Transformer-2 protein homolog alpha	26.4709	26.3572	26.3868	26.7985	26.5453	26.148
	0.403808	0.0498263	Q13601	Q13601-2;Q13601	KRR1_HUMAN	KRR1	KRR1 small subunit processome component homolog	25.2361	25.3991	25.3848	25.2831	25.2985	25.289
	0.534334	0.0824254	Q13610	F8VZ56;B4DJV5;Q13610-2;Q13610	PWP1_HUMAN	PWP1	Periodic tryptophan protein 1 homolog	28.9596	29.0729	29.0539	28.8338	29.029	28.9764
	0.312587	-0.0913722	Q13613;Q13613-2	F8WA39;Q8NEC6;H0YDX3;E9PPP8;Q13613-2;Q13613	MTMR1_HUMAN	MTMR1	Myotubularin-related protein 1	20.0258	20.3343	20.1215	20.1319	20.3958	20.2281
	3.77387	0.621446	Q13619	A0A087WWN2;Q13619	CUL4A_HUMAN	CUL4A	Cullin-4A	23.8634	23.8683	23.7517	23.2343	23.2286	23.1562
	0.559066	-0.294327	Q13620;Q13620-1	Q13620-1;Q13620-3;K4DI93;A0A7P0T9D0;A0A7P0T9L3;A0A7P0T9P5;A0A7P0T8P8;A0A7P0T954;A0A7P0T9C8;A0A7P0TAF9;A0A7P0TAQ3;A0A804CL36;A0A669KBG9;A0A669KAX4;Q13620	CUL4B_HUMAN	CUL4B	Cullin-4B	20.0178	19.8398	20.2442	20.7307	20.1594	20.0948
	0.800117	0.266388	Q13671;Q13671-2	Q13671-2;E9PNR2;Q13671	RIN1_HUMAN	RIN1	Ras and Rab interactor 1	20.141	20.3508	20.0141	19.666	20.0042	20.0365
	0.0773287	-0.0465641	Q13724	Q13724-2;A0A3B3IS52;A0A3B3IRW2;A0A3B3IRK6;A0A8I5KTK5;Q13724	MOGS_HUMAN	MOGS	Mannosyl-oligosaccharide glucosidase	24.9268	24.5153	24.2775	24.8077	24.5463	24.5052
	0.371325	0.0947018	Q13813	A0A0D9SGF6;A0A0D9SFF6;A0A0D9SF54;Q13813-2;Q13813-3;A0A994J6W3;A0A994J4G5;A0A994J498;Q13813	SPTN1_HUMAN	SPTAN1	Spectrin alpha chain, non-erythrocytic 1	23.2492	23.5095	23.1585	23.215	23.241	23.1771
	1.76259	0.150217	Q13823	Q13823	NOG2_HUMAN	GNL2	Nucleolar GTP-binding protein 2	25.8985	25.9126	25.8424	25.7658	25.6707	25.7664
	0.362436	0.351922	Q13829	J3QS43;J3QSD4;Q13829	BACD2_HUMAN	TNFAIP1	BTB/POZ domain-containing adapter for CUL3-mediated RhoA degradation protein 2	20.0158	20.0695	19.2363	19.5548	19.8671	18.8439
	0.212148	0.385266	Q13835-2	Q13835-2;Q13835	PKP1_HUMAN	PKP1	Isoform of Q13835, Isoform 1 of Plakophilin-1	20.3581	20.8586	19.3937	20.7561	19.8734	18.825
	0.159067	0.157639	Q13867	J3KS79;K7ENH5;Q13867	BLMH_HUMAN	BLMH	Bleomycin hydrolase	21.6795	21.7219	20.9077	21.2801	21.7302	20.8259
	0.537574	-0.148645	Q13868	A0A8I5QL34;Q13868-2;Q13868-3;A3KFL2;A3KFL5;B4E001;A0A8I5KVY3;A0A8I5KV47;Q13868	EXOS2_HUMAN	EXOSC2	Exosome complex component RRP4	23.722	23.8287	23.666	24.0722	23.6846	23.9058
	0.847424	0.269978	Q13885	Q13885;Q9BVA1	TBB2A_HUMAN	TUBB2A	Tubulin beta-2A chain	22.7727	22.7202	22.7507	22.1899	22.6747	22.5689
	0.353979	-0.248409	Q13888	D6RJD3;D6RIT7;D6RID8;D6RGC9;R4GMS9;Q13888;Q6P1K8	TF2H2_HUMAN	GTF2H2	General transcription factor IIH subunit 2	22.5695	22.5587	22.3104	23.2123	22.7266	22.2449
	3.43514	-0.690139	Q13895	Q13895	BYST_HUMAN	BYSL	Bystin	25.8146	25.8618	25.9809	26.6465	26.5207	26.5605
	0.472909	0.0588086	Q14004	A0A2R8Y7W5;A0A2R8Y4Z0;A0A2R8YF61;Q14004-2;Q14004	CDK13_HUMAN	CDK13	Cyclin-dependent kinase 13	22.6667	22.612	22.7493	22.6585	22.648	22.545
	0.0773555	0.0189425	Q14008;Q14008-2;Q14008-3	H0YDX5;Q14008-2;Q14008-3;Q14008	CKAP5_HUMAN	CKAP5	Cytoskeleton-associated protein 5	23.7324	23.8918	23.6295	23.8095	23.6749	23.7125
	0.179981	-0.111293	Q14011	D6W5Y5;K7EJV1;K7EJV5;K7ELT6;K7ELV6;K7EMY9;K7ENX8;K7EPM4;K7EQR7;K7ER40;Q14011-2;Q14011	CIRBP_HUMAN	CIRBP	Cold-inducible RNA-binding protein	24.6738	24.6366	23.9989	24.6745	24.3845	24.5842
	0.228199	0.0677071	Q14103;Q14103-3	H0YA96;H0Y8G5;A0A994J4R1;A0A994J440;Q14103-2;Q14103-3;Q14103-4;Q14103	HNRPD_HUMAN	HNRNPD	Heterogeneous nuclear ribonucleoprotein D0	24.9238	24.6778	24.5508	24.7192	24.6453	24.5848
	1.33912	-0.164957	Q14119	J9JIC7;J3QSH4;Q14119	VEZF1_HUMAN	VEZF1	Vascular endothelial zinc finger 1	23.964	24.0584	24.163	24.2337	24.2192	24.2275
	0.254118	0.0378526	Q14126	Q14126	DSG2_HUMAN	DSG2	Desmoglein-2	24.8882	24.8939	24.8125	24.7427	24.9249	24.8135
	1.22768	0.301318	Q14134;Q14134-2	E9PRL4;Q14134-2;Q14134	TRI29_HUMAN	TRIM29	Tripartite motif-containing protein 29	24.0673	24.0879	24.0195	23.53	23.8642	23.8765
	1.04931	0.094197	Q14137	Q14137-2;Q14137	BOP1_HUMAN	BOP1	Ribosome biogenesis protein BOP1	25.3901	25.2697	25.2814	25.2052	25.1989	25.2545
	1.06743	-0.501489	Q14141;Q14141-2;Q14141-4	Q14141-2;Q14141-4;B1AMS2;Q14141	SEPT6_HUMAN	SEPTIN6	Septin-6	21.2347	21.126	20.6556	21.5807	21.6878	21.2523
	0.169994	0.182983	Q14145	K7EJD8;K7EJ49;K7ESE0;Q14145	KEAP1_HUMAN	KEAP1	Kelch-like ECH-associated protein 1	20.7714	21.7625	21.9594	21.4915	20.9667	21.4861
	0.0225717	-0.0170714	Q14147	Q14147	DHX34_HUMAN	DHX34	Probable ATP-dependent RNA helicase DHX34	21.237	20.7133	20.3841	20.7209	20.7853	20.8794
	0.0987626	0.0534077	Q14151	Q14151	SAFB2_HUMAN	SAFB2	Scaffold attachment factor B2	24.1592	23.6233	23.5415	23.7222	23.7077	23.7339
	0.231202	-0.0492102	Q14152	Q14152-2;Q14152	EIF3A_HUMAN	EIF3A	Eukaryotic translation initiation factor 3 subunit A	29.1539	29.2149	29.3748	29.3131	29.3769	29.2014
	0.748809	-0.166344	Q14155-1;Q14155-5	A0A2R8YG42;A0A8V8TQ72;B1ALK7;E9PDQ5;Q14155-1;Q14155-2;Q14155-3;Q14155-5;Q14155-6;Q14155	ARHG7_HUMAN	ARHGEF7	Isoform of Q14155, Isoform 1 of Rho guanine nucleotide exchange factor 7	21.9811	21.8445	21.7112	22.1274	21.8993	22.0091
	0.20356	-0.0846157	Q14156	A0A1B0GUZ7;Q14156-2;Q14156	EFR3A_HUMAN	EFR3A	Protein EFR3 homolog A	22.1518	22.2512	22.2252	22.2954	22.5664	22.0203
	0.38091	0.159368	Q14157-1	F8W726;Q14157-1;Q14157-3;Q14157-4;Q14157-5;Q14157	UBP2L_HUMAN	UBAP2L	Isoform of Q14157, Isoform 2 of Ubiquitin-associated protein 2-like	29.6753	29.294	29.1054	29.3017	29.1702	29.1247
	0.690714	-0.222661	Q14157-5	F8W726;H0Y5H6;H7C2T8;Q14157-3;Q14157-5;Q14157	UBP2L_HUMAN	UBAP2L	Isoform of Q14157, Isoform 5 of Ubiquitin-associated protein 2-like	25.3877	25.8245	25.7155	25.8106	25.7891	25.996
	0.267802	0.147591	Q14160;Q14160-3	Q14160-2;Q14160-3;A0A0G2JNZ2;A0A0G2JPP5;A0A0G2JMS7;A0A669KB89;Q14160	SCRIB_HUMAN	SCRIB	Protein scribble homolog	22.7487	22.8334	22.8343	22.8977	22.8544	22.2214
	0.258159	-0.0838947	Q14181	A0A3B3ITS5;Q14181	DPOA2_HUMAN	POLA2	DNA polymerase alpha subunit B	21.3184	21.493	21.6859	21.706	21.4505	21.5925
	0.376308	-0.175067	Q14185	A0A096LNH6;Q14185	DOCK1_HUMAN	DOCK1	Dedicator of cytokinesis protein 1	20.8524	20.4052	20.2988	20.8833	20.5665	20.6318
	0.0361901	-0.0324402	Q14192	Q14192	FHL2_HUMAN	FHL2	Four and a half LIM domains protein 2	20.7195	21.0414	20.8688	20.3332	21.2397	21.1541
	0.391365	0.113558	Q14204	A0A2R8Y706;A0A2R8Y6H2;A0A2R8Y5T0;A0A2R8YFZ7;A0A7P0T9F1;A0A7P0T9K2;A0A7P0T9R4;A0A7P0T916;A0A7P0T8N2;A0A7P0T8W5;A0A7P0T9C4;A0A7P0T825;A0A7P0T7V5;A0A7P0TAW9;A0A7P0TB75;A0A7P0TBJ7;A0A7P0TAF3;A0A7P0TAM4;A0A7P0TA13;Q14204	DYHC1_HUMAN	DYNC1H1	Cytoplasmic dynein 1 heavy chain 1	23.3777	23.2964	22.9875	23.149	23.1215	23.0504
	0.434635	-0.143496	Q14232	Q14232	EI2BA_HUMAN	EIF2B1	Translation initiation factor eIF-2B subunit alpha	24.6194	24.6219	24.9884	24.747	24.9405	24.9727
	0.568867	0.187021	Q14241	Q14241	ELOA1_HUMAN	ELOA	Elongin-A	25.1569	25.0903	24.7085	24.8562	24.7142	24.8243
	0.604622	-0.0773627	Q14244	Q14244-3;Q14244-5;Q14244-6;Q14244-7;A0A087WZ40;Q14244	MAP7_HUMAN	MAP7	Ensconsin	25.2378	25.1402	25.0586	25.2587	25.234	25.1759
	1.56519	0.22243	Q14247	Q14247-2;Q14247-3;Q14247	SRC8_HUMAN	CTTN	Src substrate cortactin	25.0225	25.0628	25.067	24.8514	24.9255	24.7081
	0.269529	0.0984198	Q14254	K7EKW9;E7EMK3;J3QLD9;Q14254	FLOT2_HUMAN	FLOT2	Flotillin-2	24.2906	24.3611	24.5051	24.2207	24.5414	24.0996
	1.16384	0.194656	Q14257;Q14257-2	A8MXP8;Q14257-2;Q14257	RCN2_HUMAN	RCN2	Reticulocalbin-2	25.6409	25.7078	25.6442	25.4217	25.3695	25.6178
	0.059822	0.0305907	Q14258	A0A3B3IUA7;Q14258	TRI25_HUMAN	TRIM25	E3 ubiquitin/ISG15 ligase TRIM25	22.7689	23.0482	22.5709	22.8946	22.8562	22.5454
	1.08372	0.247451	Q14318-2	Q14318-2;M0R2Q6;M0R2K9	FKBP8_HUMAN	FKBP8	Isoform of Q14318, Isoform 2 of Peptidyl-prolyl cis-trans isomerase FKBP8	20.6262	20.7358	20.4753	20.5168	20.2759	20.3022
	0.34093	0.0829906	Q14331	E9PRR7;Q14331	FRG1_HUMAN	FRG1	Protein FRG1	24.7411	24.912	24.9667	24.7342	24.6992	24.9375
	0.225387	0.0277176	Q14344	Q14344-2;Q14344	GNA13_HUMAN	GNA13	Guanine nucleotide-binding protein subunit alpha-13	21.1455	21.2062	21.2307	21.2441	21.1056	21.1495
	0.18939	0.0976404	Q14444;Q14444-2	G3V153;E9PLA9;Q14444-2;Q14444	CAPR1_HUMAN	CAPRIN1	Caprin-1	27.1406	27.2305	26.8291	27.1701	27.0737	26.6635
	0.285192	0.276286	Q14493;Q14493-2	E7EUV9;H0YAE8;F8W8D3;H7C4H8;Q14493-2;Q14493	SLBP_HUMAN	SLBP	Histone RNA hairpin-binding protein	21.6827	21.0645	21.1859	21.582	21.1165	20.4058
	0.53648	-0.0411097	Q14498-2	Q14498-2;G3XAC6;Q5QP22;Q5QP23;Q14498	RBM39_HUMAN	RBM39	Isoform of Q14498, Isoform 2 of RNA-binding protein 39	28.5785	28.5733	28.5701	28.5676	28.5973	28.6803
	0.264984	-0.0318788	Q14527	A0A0C4DGA6;Q14527	HLTF_HUMAN	HLTF	Helicase-like transcription factor	25.3664	25.3616	25.3722	25.4838	25.3941	25.3179
	0.626028	-0.337982	Q14554	Q14554	PDIA5_HUMAN	PDIA5	Protein disulfide-isomerase A5	21.3512	21.3411	20.7993	21.739	21.571	21.1956
	0.0725278	-0.0388603	Q14558-2	Q14558-2;Q14558	KPRA_HUMAN	PRPSAP1	Isoform of Q14558, Isoform 2 of Phosphoribosyl pyrophosphate synthase-associated protein 1	21.1605	21.3318	21.1163	21.5931	21.0484	21.0838
	0.540113	0.148785	Q14562	Q14562	DHX8_HUMAN	DHX8	ATP-dependent RNA helicase DHX8	25.1747	24.9307	24.8514	24.9636	24.8361	24.7108
	0.271525	0.0241712	Q14566	Q14566	MCM6_HUMAN	MCM6	DNA replication licensing factor MCM6	24.5631	24.5686	24.6654	24.555	24.5704	24.5992
	2.82173	1.38864	Q14643;Q14643-2;Q14643-3;Q14643-4;Q14643-5;Q14643-6;Q14643-7;Q14643-8	A0A3F2YNW8;B7ZMI3;A0A3B3IRP0;A0A3B3ITM1;A0A3B3ITQ1;A0A3B3IU04;A0A3B3IU05;A0A3B3IU13;A0A3B3ITQ4;A0A3B3ITU8;Q14643-2;Q14643-3;Q14643-4;Q14643-5;Q14643-6;Q14643-7;Q14643-8;Q14573;Q14571;Q14643	ITPR1_HUMAN	ITPR1	Inositol 1,4,5-trisphosphate receptor type 1	19.2712	19.0955	19.1759	18.1336	17.6621	17.5809
	0.31252	-0.349951	Q14644;Q14644-2	Q14644-2;Q14644	RASA3_HUMAN	RASA3	Ras GTPase-activating protein 3	19.8578	20.0839	19.6197	19.7336	19.7999	21.0777
	0.873244	0.202368	Q14669-2;Q14669-4	A0A6Q8PGG9;A0A6Q8PHK0;Q14669-2;Q14669-3;Q14669-4;C9JLD7;H7C1L9;A0A994J755;A0A994J569;A0A994J4J0;A0A994J4J6;Q14669	TRIPC_HUMAN	TRIP12	Isoform of Q14669, Isoform 2 of E3 ubiquitin-protein ligase TRIP12	19.507	19.5208	19.3834	19.2863	19.0888	19.429
	0.0722626	0.0209236	Q14671	H0YEH2;H0YDK8;Q5T1Z4;Q5T1Z8;E9PR38;Q14671-2;Q14671-3;Q14671-4;Q14671	PUM1_HUMAN	PUM1	Pumilio homolog 1	23.1993	23.0946	22.9701	23.1456	22.9133	23.1423
	0.266183	0.0794919	Q14674	Q14674-2;Q14674	ESPL1_HUMAN	ESPL1	Separin	21.0484	21.2646	21.2988	21.1831	21.2425	20.9478
	0.714816	0.112434	Q14677	Q14677-2;Q14677-3;Q14677	EPN4_HUMAN	CLINT1	Clathrin interactor 1	23.8897	23.8333	23.8129	23.82	23.78	23.5986
	0.186603	-0.120813	Q14679	E7EX20;Q14679	TTLL4_HUMAN	TTLL4	Tubulin monoglutamylase TTLL4	21.1683	21.3021	21.36	20.931	21.7335	21.5283
	0.248919	-0.0465501	Q14680	A0A0D9SGI4;Q14680-2;Q14680-7;Q14680-8;Q14680	MELK_HUMAN	MELK	Maternal embryonic leucine zipper kinase	22.118	22.0965	22.081	22.2869	22.0423	22.1059
	0.360958	-0.135281	Q14683	A0A6Q8PHC3;G8JLG1;Q14683	SMC1A_HUMAN	SMC1A	Structural maintenance of chromosomes protein 1A	23.3654	23.5606	23.1392	23.6834	23.4231	23.3645
	0.52808	0.164335	Q14684	Q14684-2;Q14684	RRP1B_HUMAN	RRP1B	Ribosomal RNA processing protein 1 homolog B	24.5234	24.2501	24.176	24.0755	24.0548	24.3261
	0.45152	-0.398309	Q14689;Q14689-5;Q14689-6	A0A494C143;Q14689-2;Q14689-3;Q14689-4;Q14689-5;Q14689-6;Q14689	DIP2A_HUMAN	DIP2A	Disco-interacting protein 2 homolog A	20.9309	19.9392	20.6777	21.2784	20.4716	20.9928
	0.325418	0.0323944	Q14690	A0A3B3IUD7;Q14690	RRP5_HUMAN	PDCD11	Protein RRP5 homolog	24.6336	24.7139	24.6708	24.6699	24.6781	24.5732
	0.933185	-0.104305	Q14692	Q14692	BMS1_HUMAN	BMS1	Ribosome biogenesis protein BMS1 homolog	24.9456	24.8077	24.9403	25.0157	24.9512	25.0396
	0.217729	-0.034996	Q14694;Q14694-2;Q14694-3	Q14694-2;Q14694-3;Q14694	UBP10_HUMAN	USP10	Ubiquitin carboxyl-terminal hydrolase 10	23.9626	24.1054	23.945	23.9923	24.0143	24.1113
	0.0277188	-0.00717608	Q14697-2	Q14697-2;F5H6X6;Q14697	GANAB_HUMAN	GANAB	Isoform of Q14697, Isoform 2 of Neutral alpha-glucosidase AB	22.2262	22.384	22.3314	22.1745	22.3838	22.4048
	0.0576341	-0.0445938	Q14738	E9PFR3;Q14738-2;Q14738	2A5D_HUMAN	PPP2R5D	Serine/threonine-protein phosphatase 2A 56 kDa regulatory subunit delta isoform	23.5924	23.4031	22.9424	23.7139	23.0916	23.2662
	0.236142	0.123173	Q14739	C9JXK0;A0A494C1L1;Q14739	LBR_HUMAN	LBR	Delta(14)-sterol reductase LBR	26.4061	25.9316	25.8377	26.1444	25.8065	25.8549
	1.16887	0.0596301	Q14781	Q14781	CBX2_HUMAN	CBX2	Chromobox protein homolog 2	22.407	22.346	22.3822	22.3503	22.3091	22.2968
	0.002029	0.00089709	Q14807	Q14807-2;A0A8I5QJC5;A0A8I5QKY3;A0A8I5QL17;H3BTH5;H3BRB3;A0A8I5KQ45;A0A8I5KRF7;A0A8I5KTF7;A0A8I5KW08;A0A8I5KXF9;Q14807	KIF22_HUMAN	KIF22	Kinesin-like protein KIF22	21.476	21.7056	21.457	21.7322	21.5829	21.3209
	0.766615	-0.156743	Q14839;Q14839-2	A0A2R8Y212;A0A2R8Y8C1;A0A2R8Y7I0;A0A2R8Y7M9;A0A2R8Y425;A0A2R8Y5J0;A0A2R8Y5M9;A0A2R8Y4X2;A0A2R8Y521;A0A2R8YDW2;A0A2R8YE38;A0A2R8YDJ9;A0A2R8YD40;A0A2R8YFK9;A0A2R8YFD8;A0A2R8YER1;A0A2U3TZM0;F5GWX5;Q14839-2;A0A0C4DGG9;A0A2R8Y445;Q14839	CHD4_HUMAN	CHD4	Chromodomain-helicase-DNA-binding protein 4	23.7302	23.5065	23.6404	23.6509	23.818	23.8784
	0.324154	0.382455	Q14865;Q14865-2	A0A7P0TAD2;Q14865-2;Q14865	ARI5B_HUMAN	ARID5B	AT-rich interactive domain-containing protein 5B	20.4006	20.761	20.545	20.9265	20.3269	19.3059
	0.318234	-0.166171	Q14919;Q14919-2	Q14919-2;C9JCC6;E9PQX9;E9PNC7;Q14919	NC2A_HUMAN	DRAP1	Dr1-associated corepressor	23.9322	23.9537	23.3363	24.0273	23.9067	23.7867
	0.839709	0.246394	Q14966;Q14966-3	Q14966-2;Q14966-3;Q14966-4;Q14966-6;Q14966	ZN638_HUMAN	ZNF638	Zinc finger protein 638	24.5581	24.2572	24.1072	24.1164	24.0088	24.0581
	1.714	-0.424266	Q14974	J3KTM9;Q14974-2;Q14974	IMB1_HUMAN	KPNB1	Importin subunit beta-1	23.0093	23.1569	23.2891	23.6064	23.6926	23.429
	2.90812	-0.711725	Q14978-2	A0A0A0MRM9;Q14978-2	NOLC1_HUMAN	NOLC1	Isoform of Q14978, Isoform Beta of Nucleolar and coiled-body phosphoprotein 1	29.195	29.0769	28.9527	29.6941	29.8752	29.7905
	1.39236	-1.46017	Q14978-3	S4R341;Q14978-3	NOLC1_HUMAN	NOLC1	Isoform of Q14978, Isoform 3 of Nucleolar and coiled-body phosphoprotein 1	22.6602	23.9482	23.6228	25.2296	24.2759	25.1063
	1.10774	0.138133	Q14980	H0YFY6;Q14980-2;Q14980-5;Q14980	NUMA1_HUMAN	NUMA1	Nuclear mitotic apparatus protein 1	23.9473	23.8696	23.8382	23.7781	23.6511	23.8114
	0.000572709	0.00119146	Q14999;Q14999-2	Q14999-2;A0A669KBH4;A0A669KB95;Q14999	CUL7_HUMAN	CUL7	Cullin-7	20.1536	21.0496	19.1602	19.3812	20.2123	20.7664
	0.23269	0.107946	Q14C86;Q14C86-2;Q14C86-3;Q14C86-4;Q14C86-5;Q14C86-6	Q14C86-2;Q14C86-3;Q14C86-4;Q14C86-5;Q14C86-6;F8W9S7;Q14C86	GAPD1_HUMAN	GAPVD1	GTPase-activating protein and VPS9 domain-containing protein 1	22.307	22.3454	22.262	22.201	22.5073	21.8821
	0.786792	1.18994	Q14CN4;Q14CN4-2;Q14CN4-3;Q3SY84;Q7RTS7;Q86Y46;Q86Y46-2	Q86Y46-2;Q14CN4-2;Q14CN4-3;F8W1S1;Q86Y46;Q3SY84;Q14CN4;Q7RTS7	K2C71_HUMAN;K2C72_HUMAN;K2C73_HUMAN;K2C74_HUMAN	KRT71;KRT72;KRT73;KRT74	Keratin, type II cytoskeletal 72	22.5409	23.6505	21.8005	20.6506	22.1783	21.5933
	0.456224	-0.13861	Q14CX7	Q14CX7-2;Q14CX7	NAA25_HUMAN	NAA25	N-alpha-acetyltransferase 25, NatB auxiliary subunit	20.7717	20.4968	20.6109	20.9721	20.6445	20.6787
	0.270089	-0.0738061	Q15003	C9J470;Q15003-2;E9PHA2;Q15003	CND2_HUMAN	NCAPH	Condensin complex subunit 2	23.3893	23.5109	23.2105	23.5737	23.4009	23.3574
	0.509189	0.251523	Q15007	Q15007-2;A0A087X1R4;Q15007	FL2D_HUMAN	WTAP	Pre-mRNA-splicing regulator WTAP	23.8828	23.3029	23.2368	23.1703	23.1392	23.3585
	0.0220404	-0.0151132	Q15008;Q15008-4	Q15008-2;Q15008-3;Q15008-4;Q15008	PSMD6_HUMAN	PSMD6	26S proteasome non-ATPase regulatory subunit 6	20.5886	21.1158	21.0155	21.2292	20.6793	20.8568
	0.460788	-0.0616468	Q15014	Q15014	MO4L2_HUMAN	MORF4L2	Mortality factor 4-like protein 2	23.924	23.8102	23.9051	23.8642	23.9373	24.0228
	0.0760074	0.0387592	Q15019;Q15019-2	C9IY94;C9J938;C9J2Q4;Q15019-2;Q15019-3;B5MCX3;C9JB25;H7C310;Q15019	SEPT2_HUMAN	SEPTIN2	Septin-2	24.0229	24.0754	23.5714	23.6933	23.9618	23.8984
	0.194325	-0.0539309	Q15020	A0A499FI31;Q15020-4;Q15020	SART3_HUMAN	SART3	Squamous cell carcinoma antigen recognized by T-cells 3	23.2297	23.5653	23.4855	23.4655	23.4325	23.5442
	0.0764997	-0.0160898	Q15021	Q15021	CND1_HUMAN	NCAPD2	Condensin complex subunit 1	23.965	23.9588	23.8176	24.0126	23.9545	23.8226
	0.586601	-0.101881	Q15022	J3QQW9;Q15022	SUZ12_HUMAN	SUZ12	Polycomb protein SUZ12	21.4276	21.2485	21.452	21.4007	21.4819	21.5512
	0.26535	-0.111451	Q15024	Q15024	EXOS7_HUMAN	EXOSC7	Exosome complex component RRP42	23.4715	23.6439	23.1503	23.6583	23.5707	23.371
	0.0752411	-0.0164852	Q15029;Q15029-2	Q15029-2;Q15029-3;Q15029	U5S1_HUMAN	EFTUD2	116 kDa U5 small nuclear ribonucleoprotein component	26.4645	26.4806	26.5991	26.4196	26.5319	26.6422
	0.163847	-0.255365	Q15041;Q15041-2	Q15041-2;Q15041-3;H3BPJ2;H3BN98;Q15041	AR6P1_HUMAN	ARL6IP1	ADP-ribosylation factor-like protein 6-interacting protein 1	24.6832	23.0288	22.9194	23.5302	23.9026	23.9648
	0.648511	-0.389584	Q15043;Q15043-2;Q15043-3	Q15043-2;Q15043-3;E5RIP4;E5RJ40;E5RJG5;E5RFZ8;E5RGA7;Q15043	S39AE_HUMAN	SLC39A14	Metal cation symporter ZIP14	21.5216	21.2031	20.6786	21.425	21.754	21.393
	0.081843	-0.0249284	Q15046	Q15046-2;H3BVA8;Q15046	SYK_HUMAN	KARS1	Lysine--tRNA ligase	25.0298	25.0934	24.9271	25.1759	25.0938	24.8553
	0.361999	-0.173903	Q15047;Q15047-3	Q15047-3;E9PRF4;A0A8I5KT93;Q15047	SETB1_HUMAN	SETDB1	Histone-lysine N-methyltransferase SETDB1	20.4145	20.486	20.8046	20.441	20.7964	20.9894
	0.897127	0.0931816	Q15050	Q15050	RRS1_HUMAN	RRS1	Ribosome biogenesis regulatory protein homolog	25.9013	25.8852	25.9707	25.7528	25.8935	25.8313
	2.26494	0.336625	Q15054	Q15054	DPOD3_HUMAN	POLD3	DNA polymerase delta subunit 3	23.3286	23.3931	23.2211	22.9066	23.018	23.0083
	0.463564	0.518433	Q15056;Q15056-2	Q15056-2;A0A7I2V385;A0A7I2V4E4;Q15056	IF4H_HUMAN	EIF4H	Eukaryotic translation initiation factor 4H	23.1962	22.6973	21.8443	21.5182	22.2189	22.4454
	0.074397	0.0216503	Q15058	Q15058	KIF14_HUMAN	KIF14	Kinesin-like protein KIF14	21.3222	21.4081	21.0777	21.2986	21.2245	21.2201
	0.0842265	0.0398986	Q15059	Q15059-2;M0QZD9;O60885-2;O60885-3;Q15059;O60885	BRD3_HUMAN	BRD3	Bromodomain-containing protein 3	24.8266	24.524	24.3633	24.7267	24.4558	24.4116
	0.00101198	-0.000212987	Q15061	C9JEE7;Q15061	WDR43_HUMAN	WDR43	WD repeat-containing protein 43	23.9708	23.8147	23.7744	23.9204	23.8238	23.8163
	0.710076	0.652422	Q15070;Q15070-2	J3KNA0;E7EVY0;A0A087X0L7;Q15070-2;Q15070	OXA1L_HUMAN	OXA1L	Mitochondrial inner membrane protein OXA1L	23.6045	23.7789	22.8825	23.4037	22.479	22.4259
	0.0473077	-0.0333983	Q15084;Q15084-2;Q15084-3;Q15084-4;Q15084-5	Q15084-2;Q15084-3;Q15084-4;Q15084-5;Q15084	PDIA6_HUMAN	PDIA6	Protein disulfide-isomerase A6	20.9753	20.6725	20.4385	21.027	20.7702	20.3894
	0.517004	-0.20687	Q15125	C9J719;C9JJ78;A0A494C0F3;Q15125	EBP_HUMAN	EBP	3-beta-hydroxysteroid-Delta(8),Delta(7)-isomerase	23.0842	22.522	22.6192	22.9707	22.9811	22.8943
	0.085081	-0.0134926	Q15149	Q15149-2;Q15149-3;Q15149-4;Q15149-5;Q15149-6;Q15149-7;Q15149-8;Q15149-9;H0YDN1;E9PMV1;A0A8I5KSD5;A0A8I5KUE3;A0A8I5KYZ1;Q15149	PLEC_HUMAN	PLEC	Plectin	32.0442	32.0547	32.2049	32.0719	32.1314	32.141
	0.379224	-0.17738	Q15149-3	Q15149-3	PLEC_HUMAN	PLEC	Isoform of Q15149, Isoform 3 of Plectin	22.9699	22.9475	23.079	23.5508	23.0635	22.9143
	0.341436	-0.133167	Q15149-4	Q15149-4	PLEC_HUMAN	PLEC	Isoform of Q15149, Isoform 4 of Plectin	21.0537	21.1541	21.4694	21.4298	21.4887	21.1583
	0.50973	0.246298	Q15165;Q15165-1;Q15165-3	A0A0J9YXF2;A0A0J9YYJ1;Q15165-1;Q15165-3;Q15165	PON2_HUMAN	PON2	Serum paraoxonase/arylesterase 2	21.5122	21.568	21.7031	21.7533	21.1054	21.1857
	0.375843	0.327377	Q15181	Q15181	IPYR_HUMAN	PPA1	Inorganic pyrophosphatase	20.587	21.0042	20.8155	20.6384	20.9734	19.8128
	0.0698187	0.057457	Q15185;Q15185-3;Q15185-4	Q15185-2;Q15185-3;Q15185-4;B4DDC6;Q15185	TEBP_HUMAN	PTGES3	Prostaglandin E synthase 3	20.9632	21.5813	20.9247	20.8794	21.4854	20.9321
	0.100659	-0.0541318	Q15233	C9IZL7;A0A7P0MRW0;C9J4X2;C9JYS8;Q15233-2;A0A7I2V464;A0A7I2V4K9;A0A7I2V4N2;A0A7I2V4J2;A0A7I2V535;A0A7I2V5Y7;Q15233	NONO_HUMAN	NONO	Non-POU domain-containing octamer-binding protein	29.1204	28.849	28.654	29.1628	28.9375	28.6855
	1.05415	0.079003	Q15269	Q15269	PWP2_HUMAN	PWP2	Periodic tryptophan protein 2 homolog	23.9062	23.9277	23.9818	23.8136	23.8577	23.9074
	0.286006	-0.122506	Q15286	F5H157;Q15286	RAB35_HUMAN	RAB35	Ras-related protein Rab-35	23.6852	23.5838	23.9204	24.1223	23.789	23.6456
	0.916438	0.299124	Q15287	Q15287-2;Q15287-3;H3BV80;H3BTC0;H3BPG5;H3BMM9;Q15287	RNPS1_HUMAN	RNPS1	RNA-binding protein with serine-rich domain 1	27.42	27.3484	27.4693	27.2173	27.3022	26.8209
	0.805669	0.480325	Q15291;Q15291-2	Q15291-2;Q15291	RBBP5_HUMAN	RBBP5	Retinoblastoma-binding protein 5	21.7413	21.6925	21.3229	21.2378	21.4421	20.6359
	0.979767	-0.0833066	Q15293	Q15293	RCN1_HUMAN	RCN1	Reticulocalbin-1	25.2905	25.1917	25.2482	25.3789	25.3169	25.2844
	0.257592	0.125739	Q15334	A0A087WW77;Q15334	L2GL1_HUMAN	LLGL1	Lethal(2) giant larvae protein homolog 1	21.0289	21.0306	21.3845	21.1475	21.2034	20.7159
	0.033341	0.0284252	Q15363	E7EQ72;Q15363	TMED2_HUMAN	TMED2	Transmembrane emp24 domain-containing protein 2	20.9283	20.6203	20.2993	20.9437	20.6432	20.1757
	0.708595	-0.103188	Q15365	Q15365	PCBP1_HUMAN	PCBP1	Poly(rC)-binding protein 1	26.5626	26.6799	26.6248	26.6999	26.642	26.835
	1.65302	-0.172618	Q15366;Q15366-2	H3BSS4;H3BRU6;F8VZX2;Q15366-2;Q15366-3;Q15366-4;Q15366-5;Q15366-6;Q15366-7;Q15366-8;Q15366	PCBP2_HUMAN	PCBP2	Poly(rC)-binding protein 2	24.6554	24.5516	24.6342	24.8348	24.8071	24.7171
	0.649471	0.24156	Q15369	A0A8J9AD82;Q15369-2;A0A8I5KYG1;E5RHG8;Q15369	ELOC_HUMAN	ELOC	Elongin-C	25.4474	25.2812	25.0184	24.8046	25.0244	25.1934
	0.529179	0.360699	Q15370;Q15370-2	B8ZZU8;Q15370-2;A0A0B4J296;A0A8I5KUS5;I3L0M9;Q15370	ELOB_HUMAN	ELOB	Elongin-B	24.9998	24.8039	24.6364	24.0402	24.3281	24.9898
	0.177615	-0.13844	Q15382	C9J931;C9J469;Q15382	RHEB_HUMAN	RHEB	GTP-binding protein Rheb	20.2489	20.7243	20.2307	20.057	20.6826	20.8797
	1.01358	-0.420347	Q15386	Q15386	UBE3C_HUMAN	UBE3C	Ubiquitin-protein ligase E3C	22.4781	21.8279	22.2646	22.5905	22.6798	22.5613
	0.03144	0.0195872	Q15392;Q15392-2	Q15392-2;A0A0A0MTI1;Q15392	DHC24_HUMAN	DHCR24	Delta(24)-sterol reductase	25.0503	24.8412	24.5181	25.0587	24.5858	24.7063
	0.623177	-0.0886955	Q15393	Q15393	SF3B3_HUMAN	SF3B3	Splicing factor 3B subunit 3	25.5613	25.5818	25.7279	25.663	25.6901	25.7841
	0.130136	-0.0514037	Q15397	Q15397	PUM3_HUMAN	PUM3	Pumilio homolog 3	24.0526	23.8827	23.7717	24.1756	23.9219	23.7637
	0.14707	-0.0624402	Q15398-3	Q15398-1;Q15398-3;G3V4E5;Q15398	DLGP5_HUMAN	DLGAP5	Isoform of Q15398, Isoform 3 of Disks large-associated protein 5	22.0118	21.5745	21.6033	21.7069	21.7374	21.9326
	0.337996	0.185922	Q15404	Q15404	RSU1_HUMAN	RSU1	Ras suppressor protein 1	21.615	21.1658	21.0671	21.2306	20.7927	21.2667
	0.369562	0.188724	Q15424;Q15424-3;Q15424-4	K7EII0;Q15424-2;Q15424-3;Q15424-4;Q15424	SAFB1_HUMAN	SAFB	Scaffold attachment factor B1	24.9357	24.7387	24.3341	24.6438	24.5508	24.2477
	0.634137	0.201574	Q15427	Q5SZ64;Q15427	SF3B4_HUMAN	SF3B4	Splicing factor 3B subunit 4	25.4076	25.1743	24.9332	25.0289	24.9928	24.8887
	0.511736	0.210205	Q15428	K7EMT0;Q15428	SF3A2_HUMAN	SF3A2	Splicing factor 3A subunit 2	23.7859	24.0214	23.5059	23.6375	23.6845	23.3606
	0.618554	0.278297	Q15434	E7ETU5;F8VV01;F8W1T6;P29558-2;Q15434;P29558	RBMS2_HUMAN	RBMS2	RNA-binding motif, single-stranded-interacting protein 2	23.9686	24.1637	23.7114	23.9776	23.5173	23.5139
	0.394269	0.0541407	Q15459	Q15459-2;Q15459	SF3A1_HUMAN	SF3A1	Splicing factor 3A subunit 1	25.0717	24.9366	25.0084	25.035	24.9263	24.8929
	0.0871584	0.00231489	Q15477	H7C5N0;H7C4L3;A0A8V8TLR3;A0A8V8TN04;A0A8V8TL97;A0A8V8TLA2;A0A8V8TLC0;Q15477	SKI2_HUMAN	SKIC2	Superkiller complex protein 2	27.0774	27.072	27.0756	27.0896	27.0575	27.071
	0.540626	1.13844	Q15517	Q2L6G8;G8JLG2;Q15517	CDSN_HUMAN	CDSN	Corneodesmosin	22.6407	23.733	20.9145	20.8918	22.1649	20.8163
	1.16501	0.123049	Q15527	Q15527	SURF2_HUMAN	SURF2	Surfeit locus protein 2	26.8003	26.6935	26.8213	26.6045	26.706	26.6355
	1.18435	-0.273097	Q15572;Q15572-2;Q15572-6	Q15572-2;Q15572-4;Q15572-5;Q15572-6;H3BR71;Q15572	TAF1C_HUMAN	TAF1C	TATA box-binding protein-associated factor RNA polymerase I subunit C	21.4014	21.2645	21.5757	21.6915	21.5803	21.7891
	0.0406981	-0.0223185	Q15596	E7EWM1;Q15596	NCOA2_HUMAN	NCOA2	Nuclear receptor coactivator 2	17.715	17.1953	17.6	17.722	17.4593	17.3959
	0.558904	0.284419	Q15629;Q15629-2	Q15629-2;G3XAN4;Q15629	TRAM1_HUMAN	TRAM1	Translocating chain-associated membrane protein 1	23.7032	23.3625	22.9514	23.0842	22.9377	23.142
	1.15547	0.232011	Q15633;Q15633-2	Q15633-2;F8VZ57;F8VZZ7;F8VYK3;F8VYK6;F8VTT7;F8VP94;Q15633	TRBP2_HUMAN	TARBP2	RISC-loading complex subunit TARBP2	22.7581	22.9969	22.7057	22.5754	22.5443	22.645
	0.791722	0.301587	Q15637-6	Q15637-6;H7C561;H7C0N4	SF01_HUMAN	SF1	Isoform of Q15637, Isoform 6 of Splicing factor 1	26.3638	26.0375	25.7782	25.6657	25.8204	25.7887
	0.141723	-0.0971355	Q15642;Q15642-2	W4VSQ9;Q15642-4;Q15642-2;Q15642-3;Q15642-5;M0R0F9;M0R2H7;Q15642	CIP4_HUMAN	TRIP10	Cdc42-interacting protein 4	21.0611	20.8715	20.7273	20.6598	20.8513	21.4403
	1.38062	-0.245946	Q15645	Q15645	PCH2_HUMAN	TRIP13	Pachytene checkpoint protein 2 homolog	23.0222	22.8574	22.9606	23.3275	23.1124	23.1381
	0.945257	0.181214	Q15646	A0A7P0T9H8;A0A7P0TB39;Q15646	OASL_HUMAN	OASL	2'-5'-oligoadenylate synthase-like protein	24.1008	23.979	24.1511	23.9419	23.994	23.7514
	0.96366	0.413084	Q15648	Q15648-3;Q15648	MED1_HUMAN	MED1	Mediator of RNA polymerase II transcription subunit 1	19.6207	19.722	19.1708	18.8836	19.1461	19.2446
	1.33941	-0.265005	Q15649	Q15649-2;A0A087X045;A0A087WY54;Q15649	ZNHI3_HUMAN	ZNHIT3	Zinc finger HIT domain-containing protein 3	22.5433	22.4052	22.432	22.7778	22.5637	22.8339
	5.30424	-0.350461	Q15650	H0YL91;H3BMU9;Q15650	TRIP4_HUMAN	TRIP4	Activating signal cointegrator 1	26.0406	26.0103	26.0104	26.3708	26.3654	26.3764
	0.224431	0.335663	Q15651	A0A994J3W4;A0A087WZE9;Q15651	HMGN3_HUMAN	HMGN3	High mobility group nucleosome-binding domain-containing protein 3	24.3411	24.6363	23.284	24.5816	23.382	23.2909
	0.378444	0.358791	Q15654	Q15654	TRIP6_HUMAN	TRIP6	Thyroid receptor-interacting protein 6	20.6545	20.0837	20.111	19.2269	20.1899	20.3561
	0.0332553	0.0298583	Q15691	Q15691	MARE1_HUMAN	MAPRE1	Microtubule-associated protein RP/EB family member 1	22.2418	21.8977	21.2514	21.8943	21.5995	21.8076
	1.43019	0.394037	Q15696	A0A8I5QKS0;A0A8I5KSD0;A0A8I5KRH1;Q15696	U2AFM_HUMAN	ZRSR2	U2 small nuclear ribonucleoprotein auxiliary factor 35 kDa subunit-related protein 2	22.4061	22.1752	22.0065	21.7436	21.7505	21.9116
	0.419834	0.18758	Q15717;Q15717-2	M0R055;M0QZR9;Q15717-2;Q15717	ELAV1_HUMAN	ELAVL1	ELAV-like protein 1	22.2089	22.2926	22.2029	22.2741	22.1938	21.6737
	0.0559993	-0.0255458	Q15758	M0QXM4;M0QX44;Q15758	AAAT_HUMAN	SLC1A5	Neutral amino acid transporter B(0)	22.0982	21.9776	21.5801	21.9193	21.877	21.9363
	0.800918	-0.165829	Q15773	F5H0Y3;Q15773	MLF2_HUMAN	MLF2	Myeloid leukemia factor 2	23.3981	23.4646	23.5266	23.8009	23.5771	23.5088
	0.5502	0.122143	Q15776	Q15776	ZKSC8_HUMAN	ZKSCAN8	Zinc finger protein with KRAB and SCAN domains 8	22.5988	22.5113	22.7131	22.3602	22.4651	22.6316
	0.0719596	0.0879955	Q15906;Q15906-2	Q15906-2;Q15906	VPS72_HUMAN	VPS72	Vacuolar protein sorting-associated protein 72 homolog	20.7401	20.0827	20.3179	20.972	20.2577	19.647
	0.55281	0.130819	Q15907	H3BSC1;B4DQU5;P62491-2;H3BMH2;Q15907-2;P62491;Q15907	RB11B_HUMAN	RAB11B	Ras-related protein Rab-11B	21.8584	21.8266	21.7773	21.6795	21.8718	21.5186
	0.391085	0.0997302	Q15910;Q15910-2;Q15910-3	A0A804HLB8;E9PDH6;G3XAL2;Q15910-2;Q15910-3;Q15910-4;Q15910-5;Q15910	EZH2_HUMAN	EZH2	Histone-lysine N-methyltransferase EZH2	22.179	22.2153	21.9412	21.8829	22.0707	22.0826
	1.06535	0.464304	Q15942;Q15942-2	H0Y2Y8;H7C3D3;Q15942-2;Q15942	ZYX_HUMAN	ZYX	Zyxin	20.0439	19.8111	19.4831	19.2063	19.5634	19.1756
	0.174809	0.0977408	Q16181;Q16181-2	A0A0U1RRE1;A0A0U1RRH9;E7ES33;E7EPK1;Q16181-2;G3V1Q4;A0A024RA87;Q16181	SEPT7_HUMAN	SEPTIN7	Septin-7	24.3117	24.5071	23.8744	24.1207	24.3119	23.9674
	0.765808	0.362026	Q16186	A0A087WUX6;A0A087WX59;Q16186	ADRM1_HUMAN	ADRM1	Proteasomal ubiquitin receptor ADRM1	19.2497	19.2873	18.8864	18.4291	18.9207	18.9876
	0.399749	0.266963	Q16204	Q16204	CCDC6_HUMAN	CCDC6	Coiled-coil domain-containing protein 6	22.5226	22.715	21.8291	21.9588	22.2527	22.0543
	0.636385	0.162959	Q16342;Q16342-3	Q16342-3;F5H4V9;Q16342	PDCD2_HUMAN	PDCD2	Programmed cell death protein 2	22.5632	22.7645	22.5019	22.2791	22.5328	22.5289
	0.322891	0.135207	Q16513;Q16513-2;Q16513-3	Q16513-2;Q16513-3;B1AL79;Q16513	PKN2_HUMAN	PKN2	Serine/threonine-protein kinase N2	21.9306	21.7313	21.416	21.6854	21.3984	21.5885
	2.47666	1.08349	Q16531	A0A7P0T965;A0A7P0T870;A0A7P0TAK7;A0A7P0Z4L2;A0A7P0Z3Z5;A0A7P0Z4B9;F5GZY8;F5GY55;F5GWI0;F5H2L3;Q16531	DDB1_HUMAN	DDB1	DNA damage-binding protein 1	26.2685	26.2857	25.9267	25.0435	25.3132	24.8737
	0.301741	-0.134737	Q16540	Q16540	RM23_HUMAN	MRPL23	Large ribosomal subunit protein uL23m	23.4879	23.4271	23.736	23.9664	23.6572	23.4316
	1.42318	0.243481	Q16543	K7EKQ2;Q16543	CDC37_HUMAN	CDC37	Hsp90 co-chaperone Cdc37	23.0848	23.0803	23.2142	22.7537	22.974	22.9212
	0.689875	0.457038	Q16560;Q16560-2	Q16560-2;Q16560	U1SBP_HUMAN	SNRNP35	U11/U12 small nuclear ribonucleoprotein 35 kDa protein	25.1189	24.9741	24.1646	24.3235	24.3697	24.1934
	1.05752	0.135963	Q16576	E9PC52;Q5JP01;Q16576-2;Q16576	RBBP7_HUMAN	RBBP7	Histone-binding protein RBBP7	25.0027	24.8709	24.856	24.8504	24.7297	24.7416
	0.513773	0.192453	Q16629;Q16629-2;Q16629-3;Q16629-4	Q16629-2;Q16629-3;Q16629-4;C9JAB2;A0A0B4J1Z1;Q16629	SRSF7_HUMAN	SRSF7	Serine/arginine-rich splicing factor 7	29.639	29.1869	29.1679	29.2276	29.1569	29.032
	0.0596244	0.0426788	Q16630-2	Q16630-2;Q16630-3;F8WJN3;Q16630	CPSF6_HUMAN	CPSF6	Isoform of Q16630, Isoform 2 of Cleavage and polyadenylation specificity factor subunit 6	29.2537	28.713	28.557	29.0571	28.6948	28.6437
	1.07063	0.379574	Q16637;Q16637-3	E7EQZ4;H0YBZ9;B4DP61;A0A1W2PRV5;A0A0G2JRX5;A0A0G2JRY6;Q16637-2;Q16637-3;Q16637-4;Q16637	SMN_HUMAN	SMN2	Survival motor neuron protein	25.5411	25.1897	25.2954	24.8892	25.2154	24.7829
	0.598743	0.154329	Q16643;Q16643-3	D6RFI1;D6RCR4;D6R9W4;Q16643-2;Q16643-3;Q16643	DREB_HUMAN	DBN1	Drebrin	24.4375	24.6418	24.7963	24.5293	24.512	24.3713
	0.797162	-0.325786	Q16658	Q16658	FSCN1_HUMAN	FSCN1	Fascin	21.791	21.8041	21.6726	22.3237	22.2011	21.7203
	0.78288	0.363804	Q16666;Q16666-2;Q16666-3;Q16666-6	Q16666-6;Q16666-8;Q16666-2;Q16666-3;Q16666	IF16_HUMAN	IFI16	Gamma-interferon-inducible protein 16	20.8862	20.775	20.4396	20.0073	20.5508	20.4514
	0.53839	-0.0707448	Q16698;Q16698-2	Q16698-2;E5RJG7;E5RJD2;E5RFV2;Q16698	DECR_HUMAN	DECR1	2,4-dienoyl-CoA reductase [(3E)-enoyl-CoA-producing], mitochondrial	28.5149	28.7013	28.6131	28.6685	28.6506	28.7224
	0.466056	-0.358013	Q16777;Q6FI13	H0YFX9;A0A0U1RR32;A0A0U1RRH7;P0C0S8;P04908;Q6FI13;P20671;Q9BTM1;Q99878;Q7L7L0;Q93077;Q16777;Q96KK5	H2A2A_HUMAN;H2A2C_HUMAN	H2AC19;H2AC20	Histone H2A type 2-C	31.7316	31.6862	32.0572	31.9885	32.7921	31.7685
	0.167132	-0.0611598	Q16795	F5GY40;A0A3B3ISG8;Q16795	NDUA9_HUMAN	NDUFA9	NADH dehydrogenase [ubiquinone] 1 alpha subcomplex subunit 9, mitochondrial	23.8885	23.8635	23.6831	23.9943	23.9952	23.629
	0.0244436	-0.0197493	Q16880	Q16880	CGT_HUMAN	UGT8	2-hydroxyacylsphingosine 1-beta-galactosyltransferase	24.9138	24.4813	24.3488	25.012	24.3228	24.4684
	0.357423	0.103285	Q16891-2	Q16891-3;Q16891-4;Q16891-2;D6RAW4;B9A067;Q16891	MIC60_HUMAN	IMMT	Isoform of Q16891, Isoform 2 of MICOS complex subunit MIC60	23.3056	23.1996	23.0805	23.1983	22.8895	23.188
	0.173411	-0.0615381	Q17RY0;Q17RY0-2	B7ZLQ8;H0YBG1;Q17RY0-2;E5RJM0;Q17RY0	CPEB4_HUMAN	CPEB4	Cytoplasmic polyadenylation element-binding protein 4	22.8799	22.8146	22.8423	22.6418	23.0225	23.0571
	0.147011	-0.0659351	Q17RY6	Q17RY6	LY6K_HUMAN	LY6K	Lymphocyte antigen 6K	21.2846	21.0125	20.8467	21.243	20.9006	21.198
	0.215231	0.0446968	Q1ED39	H3BMC9;Q1ED39	KNOP1_HUMAN	KNOP1	Lysine-rich nucleolar protein 1	21.9019	21.9277	21.9208	21.7249	21.8899	22.0015
	0.00341135	-0.000224431	Q1KMD3	H3BQZ7;Q1KMD3	HNRL2_HUMAN	HNRNPUL2	Heterogeneous nuclear ribonucleoprotein U-like protein 2	23.7535	23.7627	23.8194	23.7885	23.7804	23.7672
	0.682049	0.13947	Q27J81;Q27J81-2	A0A6Q8PFW4;A0A6Q8PGN3;A0A6Q8PGC7;A0A6Q8PHA2;A0A6Q8PH63;A0A6Q8PH71;A0A6Q8PH25;A0A6Q8PF29;A0A6Q8PF44;A0A6Q8PHG2;A0A6Q8PHS8;Q27J81-2;A0A0A0MQU1;A0A087X118;Q27J81	INF2_HUMAN	INF2	Inverted formin-2	23.4569	23.3416	23.3579	23.0746	23.3347	23.3286
	0.423988	-0.0993048	Q29RF7	Q29RF7	PDS5A_HUMAN	PDS5A	Sister chromatid cohesion protein PDS5 homolog A	24.0327	23.7697	23.7867	24.0673	23.9169	23.9028
	0.620884	0.14465	Q2KHR3	Q2KHR3-2;A0A3B3IRW6;Q2KHR3	QSER1_HUMAN	QSER1	Glutamine and serine-rich protein 1	21.9664	21.814	21.8064	21.8993	21.6234	21.6302
	1.44402	-0.227903	Q2M389	A0A087X256;Q2M389	WASC4_HUMAN	WASHC4	WASH complex subunit 4	23.6636	23.7525	23.554	23.7978	23.9033	23.9527
	2.61315	-0.476514	Q2NL82	Q2NL82	TSR1_HUMAN	TSR1	Pre-rRNA-processing protein TSR1 homolog	28.3861	28.4376	28.5989	29.0068	28.9174	28.9279
	0.262249	0.178555	Q2QGD7;Q2QGD7-2	Q2QGD7-2;Q2QGD7	ZXDC_HUMAN	ZXDC	Zinc finger protein ZXDC	16.9927	17.5206	16.9707	17.1683	16.5763	17.2037
	0.389875	0.349076	Q2TAM9	Q2TAM9	TUSC1_HUMAN	TUSC1	Tumor suppressor candidate gene 1 protein	23.5669	23.1468	22.3948	22.8841	22.8027	22.3744
	0.389664	-0.115889	Q2TAY7	Q2TAY7	SMU1_HUMAN	SMU1	WD40 repeat-containing protein SMU1	23.7295	24.1118	23.9616	24.1563	24.0374	23.9568
	0.947378	0.37141	Q2TB10	C9K0M9;C9JLY3;C9JHX9;Q2TB10	ZN800_HUMAN	ZNF800	Zinc finger protein 800	21.6114	21.7883	21.6135	20.9694	21.5588	21.3707
	0.497378	-0.134607	Q2TB18	D6RG30;Q2TB18-2;Q2TB18	ASTE1_HUMAN	ASTE1	Protein asteroid homolog 1	23.5443	23.4956	23.7654	23.7677	23.8638	23.5777
	0.9568	0.315301	Q2TBE0	H0YE03;Q2TBE0-2;Q2TBE0-3;H7C3G7;Q2TBE0	C19L2_HUMAN	CWF19L2	CWF19-like protein 2	23.8625	23.9156	24.0824	23.3636	23.8164	23.7347
	1.87492	0.220713	Q32MZ4;Q32MZ4-2;Q32MZ4-3	C9JTC6;Q32MZ4-2;Q32MZ4-3;Q32MZ4	LRRF1_HUMAN	LRRFIP1	Leucine-rich repeat flightless-interacting protein 1	24.8172	24.7588	24.7574	24.4878	24.6499	24.5335
	0.82683	-0.385002	Q32NC0	A0A087X0E7;Q32NC0	CR021_HUMAN	C18orf21	UPF0711 protein C18orf21	23.399	22.9211	22.7292	23.335	23.3026	23.5667
	0.347209	0.1216	Q32P44	G3V195;H7C355;B7WPE2;Q32P44	EMAL3_HUMAN	EML3	Echinoderm microtubule-associated protein-like 3	21.9305	21.5892	21.5337	21.4139	21.659	21.6157
	0.320481	-0.207672	Q3B726	Q3B726	RPA43_HUMAN	POLR1F	DNA-directed RNA polymerase I subunit RPA43	18.7711	19.1561	19.218	18.9358	19.1401	19.6923
	0.0153652	-0.00598844	Q3KQU3	D3DPS3;C9JIR3;Q3KQU3-2;Q3KQU3-4;Q3KQU3	MA7D1_HUMAN	MAP7D1	MAP7 domain-containing protein 1	25.3887	25.3537	25.2607	25.5633	25.3205	25.1373
	1.26735	-0.164246	Q3L8U1;Q3L8U1-2;Q3L8U1-3	H3BTW3;Q3L8U1-2;Q3L8U1-3;Q3L8U1	CHD9_HUMAN	CHD9	Chromodomain-helicase-DNA-binding protein 9	23.3365	23.2519	23.1364	23.4415	23.3947	23.3814
	0.968134	0.415092	Q3MHD2;Q3MHD2-2	Q3MHD2-2;K7ELG9;Q3MHD2	LSM12_HUMAN	LSM12	Protein LSM12	26.4139	26.259	26.1679	25.5467	26.1961	25.8529
	0.914463	-1.18213	Q3MIX3	E9PLF3;E9PJ20;Q3MIX3	ADCK5_HUMAN	ADCK5	Uncharacterized aarF domain-containing protein kinase 5	20.5249	20.6555	19.7937	20.6643	21.3409	22.5154
	0.695512	0.25883	Q3YEC7;Q3YEC7-2	Q3YEC7-2;Q3YEC7	RABL6_HUMAN	RABL6	Rab-like protein 6	21.3362	21.0402	20.9135	20.9392	20.9646	20.6097
	0.221523	0.246552	Q3ZCM7	A0A075B736;Q5SQY0;Q3ZCM7	TBB8_HUMAN	TUBB8	Tubulin beta-8 chain	24.3556	24.4817	24.5116	23.4034	24.3218	24.8839
	0.173995	0.034483	Q3ZCQ8;Q3ZCQ8-2	Q3ZCQ8-2;Q3ZCQ8-3;M0R003;M0R047;M0R2Q2;M0R1Y4;Q3ZCQ8	TIM50_HUMAN	TIMM50	Mitochondrial import inner membrane translocase subunit TIM50	22.6094	22.73	22.5363	22.6881	22.5576	22.5265
	0.473779	-0.169746	Q499Z4	Q9BSK1-2;P52747-2;P52747-3;A0A1W2PQ54;A0A0A0MP75;M0QZI7;G5E9B8;E7EN86;Q8N8E2-2;Q9UJW8-2;Q9UJW8-3;Q9UJW8-4;A0A087X2B0;F5H032;Q9NX65-2;Q9NX65-3;Q86TJ5;Q7Z3I7;Q86UD4;P52747;Q499Z4;Q99612;Q9UJW8;Q9BSK1;Q8WXB4;O94892;Q9HCG1;Q9NX65;Q8N8E2;P17017;Q15937	ZN672_HUMAN	ZNF672	Zinc finger protein 672	22.3738	22.1911	22.1099	22.271	22.25	22.6631
	0.182683	-0.0424175	Q49A26;Q49A26-2;Q49A26-3	Q49A26-2;Q49A26-3;Q49A26-4;Q49A26-5;K7EMM8;K7EQB2;Q49A26	GLYR1_HUMAN	GLYR1	Cytokine-like nuclear factor N-PAC	22.9107	23.0119	22.7266	22.9136	22.882	22.9808
	0.185147	-0.0395209	Q4AC94	H0YG44;A0A7P0T8V8;A0A7P0T883;Q4AC94-1;Q4AC94-2;Q4AC94-3;Q4AC94-4;H7BZB4;H7C288;A0A7P0Z4J2;A0A7P0Z475;Q4AC94	C2CD3_HUMAN	C2CD3	C2 domain-containing protein 3	20.7216	20.4942	20.4671	20.5842	20.6217	20.5955
	0.0790498	0.023461	Q4G0J3	Q4G0J3-2;Q4G0J3-3;H0YA82;D6R9Z6;A0A8Q3WK75;A0A8I5KUI4;A0A8I5KSZ3;A0A8Q3SHN7;A0A8Q3SHF1;A0A8Q3SHG9;A0A8Q3SHH4;Q4G0J3	LARP7_HUMAN	LARP7	La-related protein 7	25.3618	25.238	25.045	25.2471	25.0926	25.2347
	0.172447	0.0561816	Q4KMP7	Q4KMP7	TB10B_HUMAN	TBC1D10B	TBC1 domain family member 10B	22.7595	22.5185	22.3345	22.4952	22.4805	22.4682
	0.0467286	0.036218	Q4KMQ1	Q4KMQ1	TPRN_HUMAN	TPRN	Taperin	16.2879	16.7448	16.4717	16.9157	16.1624	16.3176
	0.687413	-0.627907	Q4ZHG4	Q4ZHG4	FNDC1_HUMAN	FNDC1	Fibronectin type III domain-containing protein 1	21.5705	22.227	21.7507	23.1986	22.2305	22.0027
	0.256141	0.0837186	Q52LJ0	Q52LJ0-1;Q52LJ0	FA98B_HUMAN	FAM98B	Protein FAM98B	23.0962	23.1887	22.8216	23.0683	22.8302	22.9569
	1.12471	0.135923	Q53EL6;Q53EL6-2	Q53EL6-2;Q5VZS7;Q53EL6	PDCD4_HUMAN	PDCD4	Programmed cell death protein 4	27.6561	27.5763	27.587	27.567	27.4513	27.3934
	0.62216	0.311573	Q53F19	Q53F19-2;Q53F19	NCBP3_HUMAN	NCBP3	Nuclear cap-binding protein subunit 3	25.1047	24.7419	24.3748	24.5753	24.3019	24.4096
	0.0491417	0.0402368	Q53GA4	Q53GA4	PHLA2_HUMAN	PHLDA2	Pleckstrin homology-like domain family A member 2	22.229	21.7414	22.0136	22.0545	21.4927	22.316
	0.270135	0.090346	Q53GQ0	A0A1B0GVY6;E9PI21;Q53GQ0	DHB12_HUMAN	HSD17B12	Very-long-chain 3-oxoacyl-CoA reductase	23.8703	23.8765	23.5186	23.5412	23.746	23.7071
	2.09091	0.226653	Q53GS7	A0A804HI94;A0A804HJ70;A0A804HIJ1;A0A804HK09;A0A804HJY9;A0A804HJB3;Q53GS7-2;Q53GS7	GLE1_HUMAN	GLE1	mRNA export factor GLE1	22.8045	22.7829	22.8904	22.5557	22.6634	22.5787
	1.0837	0.0987867	Q53GS9	B9A018;Q53GS9-2;Q53GS9-3;A0A087X1B2;Q53GS9	SNUT2_HUMAN	USP39	U4/U6.U5 tri-snRNP-associated protein 2	24.105	24.0442	24.0045	23.9346	23.9093	24.0134
	0.746151	0.287505	Q53HL2	Q53HL2	BOREA_HUMAN	CDCA8	Borealin	23.4318	23.4721	23.0222	22.8435	23.0193	23.2008
	0.221367	0.062322	Q53LP3	Q53LP3	SWAHC_HUMAN	SOWAHC	Ankyrin repeat domain-containing protein SOWAHC	20.1994	20.1409	19.8489	19.9656	20.02	20.0166
	0.0745318	-0.0374031	Q53T94;Q53T94-2	F8WE32;Q53T94-2;Q53T94	TAF1B_HUMAN	TAF1B	TATA box-binding protein-associated factor RNA polymerase I subunit B	20.6038	20.3197	20.6017	20.4449	20.8388	20.3537
	0.446586	-0.287652	Q53TN4;Q53TN4-3	Q53TN4-3;Q53TN4	CYBR1_HUMAN	CYBRD1	Plasma membrane ascorbate-dependent reductase CYBRD1	22.0135	21.8808	21.4348	22.4903	21.8941	21.8075
	0.495064	-2.01452	Q562R1	Q562R1	ACTBL_HUMAN	ACTBL2	Beta-actin-like protein 2	23.886	24.7702	25.219	24.0496	25.9439	29.9253
	1.85373	0.328127	Q56NI9	E5RIE3;E5RFE4;E5RFP7;Q56NI9	ESCO2_HUMAN	ESCO2	N-acetyltransferase ESCO2	23.0377	22.9739	22.7993	22.5425	22.6463	22.6377
	0.612487	-0.435029	Q5BJD5	Q5BJD5	TM41B_HUMAN	TMEM41B	Transmembrane protein 41B	21.6931	21.0699	20.6566	21.6549	21.7016	21.3681
	1.24777	-0.310436	Q5BJF2	J3KT68;Q5BJF2	SGMR2_HUMAN	TMEM97	Sigma intracellular receptor 2	24.1881	23.9672	24.0324	24.2856	24.2674	24.5661
	0.118083	0.0420717	Q5BJF6;Q5BJF6-2;Q5BJF6-3;Q5BJF6-4	Q5BJF6-10;Q5BJF6-2;Q5BJF6-3;Q5BJF6-4;Q5BJF6-5;Q5BJF6-6;Q5BJF6-7;Q5BJF6-8;Q5BJF6-9;A0A8J8Z1C3;A0A8J8YVX4;Q5BJF6	ODFP2_HUMAN	ODF2	Outer dense fiber protein 2	20.1917	20.1893	19.8127	19.9903	20.0845	19.9926
	0.547522	-0.167355	Q5BKY9	G3XAI9;Q8N9E0;Q5BKY9	F133B_HUMAN	FAM133B	Protein FAM133B	25.5287	25.373	25.7006	25.7933	25.8027	25.5084
	0.841021	0.209038	Q5BKZ1	A0A0A0MRN4;Q5BKZ1-3;Q5BKZ1	ZN326_HUMAN	ZNF326	DBIRD complex subunit ZNF326	23.2574	23.1262	22.8884	22.8029	22.9376	22.9044
	0.579211	0.193705	Q5C9Z4	Q5C9Z4	NOM1_HUMAN	NOM1	Nucleolar MIF4G domain-containing protein 1	26.6553	26.3789	26.4206	26.0541	26.3623	26.4572
	0.798743	0.887551	Q5D862	Q5D862	FILA2_HUMAN	FLG2	Filaggrin-2	23.5854	23.8649	22.8496	21.9325	23.3359	22.3689
	0.690188	0.884395	Q5F1R6-2	A0A2R8Y4Q0;A0A2R8Y4N5;Q5F1R6-2	DJC21_HUMAN	DNAJC21	Isoform of Q5F1R6, Isoform 2 of DnaJ homolog subfamily C member 21	22.346	21.608	21.1551	21.7238	20.1537	20.5784
	0.163793	0.0374107	Q5F1R6;Q5F1R6-3	Q5F1R6-2;Q5F1R6-3;Q5F1R6	DJC21_HUMAN	DNAJC21	DnaJ homolog subfamily C member 21	26.9079	26.8094	27.0777	26.8562	26.8617	26.9648
	0.899493	0.426189	Q5H9F3	Q5H9F3-1;Q5H9F3	BCORL_HUMAN	BCORL1	BCL-6 corepressor-like protein 1	18.8901	18.7371	18.4264	18.059	18.1113	18.6047
	0.578189	-0.170535	Q5H9U9	A0A804HKC9;Q5H9U9-2;Q5H9U9	DDX6L_HUMAN	DDX60L	Probable ATP-dependent RNA helicase DDX60-like	22.6095	22.6424	22.477	22.5374	22.7455	22.9576
	0.716166	-0.212348	Q5HYI8	Q5HYI8	RABL3_HUMAN	RABL3	Rab-like protein 3	20.6863	20.9685	21.0005	21.2672	20.9526	21.0726
	0.662411	0.199248	Q5HYJ3	Q5HYJ3-2;Q5HYJ3-3;F5GX09;F5H5F4;Q5HYJ3	FA76B_HUMAN	FAM76B	Protein FAM76B	23.0892	23.0101	22.7244	22.7882	22.8504	22.5874
	0.985733	0.133114	Q5JSZ5	Q5JSZ5-5;A0A804HKL6;Q5JSZ5	PRC2B_HUMAN	PRRC2B	Protein PRRC2B	26.0959	25.9968	25.8787	25.8567	25.8718	25.8436
	1.34544	-0.177555	Q5JTH9	Q5JTH9-2;Q5JTH9-3;Q5JTH9	RRP12_HUMAN	RRP12	RRP12-like protein	25.7182	25.7118	25.7839	25.812	26.0097	25.9249
	0.38353	0.295039	Q5JTV8;Q5JTV8-4	J3KN66;H0YDU3;H0YD16;H0Y4R4;Q5JTV8-3;Q5JTV8-4;Q5JTV8	TOIP1_HUMAN	TOR1AIP1	Torsin-1A-interacting protein 1	19.6521	19.5174	18.8837	18.9154	19.4882	18.7644
	0.0527887	0.0457605	Q5JTW2;Q5JTW2-5	A8MST6;A0A2R8Y7U5;A0A2R8Y7A4;Q5JTW2-2;Q5JTW2-3;Q5JTW2-5;A0A2R8Y432;A0A2R8Y5W6;A0A2R8Y589;A0A2R8Y4C1;A0A2R8YCP0;A0A2U3TZI9;Q5JTW2	CEP78_HUMAN	CEP78	Centrosomal protein of 78 kDa	23.8925	24.2174	23.6731	24.381	23.7056	23.5592
	0.586736	0.242362	Q5JVF3	Q5JVF3-2;Q5JVF3-3;Q5JVF3-4;Q5JVF3	PCID2_HUMAN	PCID2	PCI domain-containing protein 2	25.764	25.3777	25.1741	25.2547	25.2653	25.0687
	1.01709	0.257076	Q5JVS0	Q5JVS0-2;Q5JVS0	HABP4_HUMAN	HABP4	Intracellular hyaluronan-binding protein 4	23.8868	23.6297	23.5924	23.5058	23.5336	23.2983
	0.296379	0.0985006	Q5M775;Q5M775-4	A0A7P0T9K0;A0A7P0TB87;A0A7P0TBP2;A0A7P0TAS3;Q5M775-2;Q5M775-3;Q5M775-4;Q5M775-5;A0A7P0Z4I1;A0A7I2YQJ3;J3QS22;A0A7I2V451;A0A7I2V416;A0A7I2V486;A0A7I2V562;Q5M775	CYTSB_HUMAN	SPECC1	Cytospin-B	24.6912	24.9936	24.8173	24.9244	24.7095	24.5727
	1.06051	0.18369	Q5QJE6	Q5QJE6	TDIF2_HUMAN	DNTTIP2	Deoxynucleotidyltransferase terminal-interacting protein 2	26.0934	26.0166	25.964	25.6981	25.8944	25.9305
	0.559076	-0.185326	Q5RKV6	Q5RKV6	EXOS6_HUMAN	EXOSC6	Exosome complex component MTR3	22.6313	22.907	22.9625	22.8348	23.0217	23.2002
	0.252665	0.0964527	Q5SNT2	H0Y4R5;Q5SNT2-2;Q5SNT2	TM201_HUMAN	TMEM201	Transmembrane protein 201	20.9258	20.9318	21.2463	20.7674	20.9082	21.1391
	0.759842	-0.164481	Q5SRE5	Q5SRE5-2;Q5SRE5	NU188_HUMAN	NUP188	Nucleoporin NUP188	21.1769	21.2898	21.1312	21.4685	21.1896	21.4333
	0.39292	0.0398655	Q5SSJ5	B0QZK4;Q5SWC8;Q5SSJ5-2;Q5SSJ5-3;Q5SSJ5	HP1B3_HUMAN	HP1BP3	Heterochromatin protein 1-binding protein 3	25.5015	25.3707	25.4291	25.434	25.3745	25.373
	0.987276	0.270576	Q5SW79	H0Y2V6;Q5SW79-2;Q5SW79-3;Q5SW79	CE170_HUMAN	CEP170	Centrosomal protein of 170 kDa	23.5426	23.59	23.5477	23.5296	23.2443	23.0946
	0.805979	-0.472075	Q5SWA1	A0A8I5KSH1;Q5SWA1	PR15B_HUMAN	PPP1R15B	Protein phosphatase 1 regulatory subunit 15B	21.1549	20.5455	20.3769	21.4264	21.0676	20.9995
	0.0585508	0.0160853	Q5SY16	Q5SY16	NOL9_HUMAN	NOL9	Polynucleotide 5'-hydroxyl-kinase NOL9	23.8139	23.8652	23.8672	23.9401	23.6465	23.9115
	0.459451	0.161839	Q5T0N5;Q5T0N5-2;Q5T0N5-3;Q5T0N5-4;Q5T0N5-5	Q5T0N5-2;Q5T0N5-3;Q5T0N5-4;Q5T0N5-5;Q5T0N5	FBP1L_HUMAN	FNBP1L	Formin-binding protein 1-like	23.8626	23.8337	23.4559	23.5604	23.6867	23.4195
	0.369002	0.195056	Q5T0W9	Q5T0W9	FA83B_HUMAN	FAM83B	Protein FAM83B	22.8878	22.5246	22.7323	22.1651	22.8354	22.5589
	0.747597	-0.813779	Q5T160	A0A8I5QJX6;H0Y450;H0UI22;A0A8I5KPX4;A0A8I5KPZ0;A0A8I5KPZ4;A0A8I5KP51;A0A8I5KS32;A0A8I5KQV7;A0A8I5KWC6;A0A8I5KXM9;Q5T160	SYRM_HUMAN	RARS2	Probable arginine--tRNA ligase, mitochondrial	20.7306	20.7913	20.8061	21.9227	20.608	22.2386
	0.134466	0.125169	Q5T1J5;Q9Y6H1	Q9Y6H1;Q5T1J5	CHCH2_HUMAN;CHCH9_HUMAN	CHCHD2;CHCHD2P9	Putative coiled-coil-helix-coiled-coil-helix domain-containing protein CHCHD2P9, mitochondrial	21.4889	21.4166	20.7695	20.5907	21.3976	21.3112
	0.352885	0.534574	Q5T1M5;Q5T1M5-2	A0A8I5QJ94;A0A8I5QJL3;Q5T1M5-2;A0A8I5KX71;Q5T1M5	FKB15_HUMAN	FKBP15	FK506-binding protein 15	20.1499	20.317	18.5583	19.7098	18.9193	18.7924
	0.478231	0.435888	Q5T200	Q5T200-2;A0A7I2V4I5;Q5T200	ZC3HD_HUMAN	ZC3H13	Zinc finger CCCH domain-containing protein 13	24.655	24.1539	23.3789	23.8597	23.3853	23.6351
	0.373866	0.131877	Q5T280	Q5T280	CI114_HUMAN	SPOUT1	Putative methyltransferase C9orf114	24.3722	24.1232	24.3819	24.0572	24.4022	24.0225
	0.439511	-0.157477	Q5T2T1;Q5T2T1-2	Q5T2T1-2;U5GXS2;Q5T2T1	MPP7_HUMAN	MPP7	MAGUK p55 subfamily member 7	20.196	20.069	20.2484	20.0554	20.5451	20.3854
	0.498006	0.131992	Q5T3I0	E9PAV9;A0A0A0MRK1;Q5T3I0-2;Q5T3I0-3;E9PPY4;F2Z3C6;Q5T3I0	GPTC4_HUMAN	GPATCH4	G patch domain-containing protein 4	24.7183	24.7131	24.6413	24.3443	24.6048	24.7276
	0.530122	-0.119253	Q5T4S7;Q5T4S7-2;Q5T4S7-3	Q5T4S7-2;Q5T4S7-3;Q5T4S7-4;Q5T4S7	UBR4_HUMAN	UBR4	E3 ubiquitin-protein ligase UBR4	22.0623	22.186	21.9844	22.2991	22.2518	22.0396
	1.27172	-1.00916	Q5T5E6	Q5T5E6	Q5T5E6_HUMAN	KCNK1	Isoform of O00180, Potassium channel subfamily K member 1 (Fragment)	24.5053	25.4104	25.5715	26.0851	25.9322	26.4973
	0.110283	-0.0129808	Q5T5U3	E7ESW5;A0A805TBS0;Q5T5U3-3;A0A1B0GV73;A0A7P0TAS2;A0A087WW76;Q5T5U3	RHG21_HUMAN	ARHGAP21	Rho GTPase-activating protein 21	22.4294	22.5391	22.4405	22.4371	22.5208	22.49
	1.25679	0.33695	Q5T653	A0A669KAX9;Q5T653	RM02_HUMAN	MRPL2	Large ribosomal subunit protein uL2m	23.8371	23.8049	23.589	23.2229	23.4357	23.5616
	0.587765	0.175752	Q5T6F2	Q5JV08;A0A8C8KGQ8;A0A8C8MQ70;Q5T6F2	UBAP2_HUMAN	UBAP2	Ubiquitin-associated protein 2	25.2151	25.0466	24.7868	24.7511	24.8549	24.9153
	0.527304	-0.156783	Q5T6S3	A0A087X169;Q5T6S3	PHF19_HUMAN	PHF19	PHD finger protein 19	20.5366	20.3418	20.3457	20.38	20.5416	20.7728
	0.787331	0.529488	Q5T749	Q5T749	KPRP_HUMAN	KPRP	Keratinocyte proline-rich protein	23.1479	23.5226	22.8465	22.4529	23.1214	22.3542
	0.0897113	0.014768	Q5T8I3	Q5T8I3-2;Q5T8I3	EEIG2_HUMAN	EEIG2	EEIG family member 2	24.3415	24.3806	24.244	24.2974	24.3848	24.2396
	0.127319	0.075154	Q5T8P6-2	Q5T8P6-2;Q5T8P6-3;Q5T8P6-6;A0A087X0H9;Q5T8P6	RBM26_HUMAN	RBM26	Isoform of Q5T8P6, Isoform 2 of RNA-binding protein 26	27.4303	26.8377	26.875	27.1668	26.9208	26.83
	0.327338	0.275439	Q5T8P6-4	Q5T8P6-4;A0A087X0H9;Q5T8P6	RBM26_HUMAN	RBM26	Isoform of Q5T8P6, Isoform 4 of RNA-binding protein 26	25.3281	24.6534	24.1958	24.6109	24.2458	24.4943
	0.144516	0.0987123	Q5T9L3;Q5T9L3-2	H0YCG9;E9PQK1;E9PM62;E9PJW4;E9PKJ0;Q5T9L3-2;Q5T9L3-3;Q5T9L3	WLS_HUMAN	WLS	Protein wntless homolog	22.3447	21.9615	21.5732	22.0239	21.6238	21.9356
	0.0183219	0.00553258	Q5TAQ9	Q5TAQ9-2;V9GY54;Q5TAQ9	DCAF8_HUMAN	DCAF8	DDB1- and CUL4-associated factor 8	22.0529	22.1338	22.1819	21.954	22.2763	22.1217
	0.375045	-0.179787	Q5TAX3	H0YEE8;H0YDJ1;A0A0C4DFM7;Q5TAX3	TUT4_HUMAN	TUT4	Terminal uridylyltransferase 4	20.5194	20.4201	20.1292	20.7714	20.6147	20.2219
	0.350474	-0.101882	Q5TB30	H0YES2;Q5TB30-2;Q5TB30	DEP1A_HUMAN	DEPDC1	DEP domain-containing protein 1A	22.3858	22.2875	22.6692	22.5663	22.4758	22.606
	0.305891	-0.137692	Q5TC63	Q5TC63-2;Q5TC63-3;Q5TC63	GRTP1_HUMAN	GRTP1	Growth hormone-regulated TBC protein 1	21.3509	21.4104	21.1505	21.5759	21.6367	21.1122
	0.490987	-0.226116	Q5TCS8;Q5TCS8-1;Q5TCS8-3;Q5TCS8-6	J3KP89;Q5TCS8-1;Q5TCS8-3;Q5TCS8-6;Q5TCS8	KAD9_HUMAN	AK9	Adenylate kinase 9	21.5686	21.9825	22.0599	21.8357	22.2213	22.2324
	0.400331	0.412654	Q5TCZ1;Q5TCZ1-3	Q5TCZ1-2;Q5TCZ1-3;Q5TCZ1	SPD2A_HUMAN	SH3PXD2A	SH3 and PX domain-containing protein 2A	22.8696	22.5847	22.3552	21.3732	22.539	22.6593
	0.896853	-0.369751	Q5TEC6	A0A590UJL8;Q5TEC6	H37_HUMAN	H3-7	Histone H3-7	31.1209	30.8942	31.5412	31.5187	31.5274	31.6194
	1.43751	-0.958293	Q5TEJ8-2	Q5TEJ8-2	THMS2_HUMAN	THEMIS2	Isoform of Q5TEJ8, Isoform 2 of Protein THEMIS2	23.74	23.6949	24.6433	24.935	25.0223	24.9958
	0.48565	0.0560608	Q5TGY3	Q5TGY3	AHDC1_HUMAN	AHDC1	Transcription factor Gibbin	23.3758	23.244	23.2553	23.29	23.2051	23.2117
	0.923986	0.675833	Q5VSY0;Q5VSY0-2	Q5VSY0-2;Q5VSY0	GKAP1_HUMAN	GKAP1	G kinase-anchoring protein 1	22.2586	22.0872	21.2596	20.9021	21.2971	21.3788
	0.592174	0.180755	Q5VT52;Q5VT52-3;Q5VT52-5	Q5VT52-2;Q5VT52-3;Q5VT52-5;Q5VT52	RPRD2_HUMAN	RPRD2	Regulation of nuclear pre-mRNA domain-containing protein 2	21.3668	21.4071	21.0381	20.9613	21.2037	21.1048
	0.17773	0.113298	Q5VT66;Q5VT66-2	Q5VT66-2;Q5VT66-3;H7BYZ9;A0A8Q3SHL7;A0A8Q3SHG3;Q5VT66	MARC1_HUMAN	MTARC1	Mitochondrial amidoxime-reducing component 1	21.1937	20.9734	20.5842	21.1238	20.7053	20.5823
	1.09105	0.422117	Q5VTB9-3	Q5TDE7;Q5TDE8;Q5VTB9-3;Q5VTB9	RN220_HUMAN	RNF220	Isoform of Q5VTB9, Isoform 2 of E3 ubiquitin-protein ligase RNF220	23.0955	22.9811	22.6342	22.5487	22.2525	22.6432
	0.366665	-0.185733	Q5VTE6;Q5VTE6-2	Q5VTE6-2;Q5VTE6	ANGE2_HUMAN	ANGEL2	Protein angel homolog 2	21.6125	21.517	22.0762	21.6779	22.0161	22.0689
	0.375143	0.114406	Q5VTL8	Q5VTL8-2;Q5VTL8	PR38B_HUMAN	PRPF38B	Pre-mRNA-splicing factor 38B	28.4519	28.1885	28.331	28.3862	28.2116	28.0303
	0.482492	-0.292842	Q5VTR2	C9J0A5;C9JXC9;Q5VTR2	BRE1A_HUMAN	RNF20	E3 ubiquitin-protein ligase BRE1A	20.0204	20.0509	19.5628	20.584	20.0423	19.8864
	0.00292043	-0.00225321	Q5VU97	A0A0A0MQY7;Q5VU97	CAHD1_HUMAN	CACHD1	VWFA and cache domain-containing protein 1	25.7136	25.6717	25.3655	25.4989	26.0153	25.2434
	0.51552	0.257518	Q5VUA4	Q5VUA4-2;Q5VUA4	ZN318_HUMAN	ZNF318	Zinc finger protein 318	22.859	22.5969	22.2651	22.4875	22.4134	22.0475
	0.534845	-0.237505	Q5VV63	A0A3B3ISV6;Q5VV63	ATRN1_HUMAN	ATRNL1	Attractin-like protein 1	21.36	20.9415	20.7017	21.3117	21.2023	21.2017
	0.173251	-0.0702896	Q5VW36	S4R437;Q5VW36	FOCAD_HUMAN	FOCAD	Focadhesin	25.0167	24.6265	24.6401	24.9989	24.7742	24.721
	0.859805	-0.184817	Q5VWQ0	Q6PCB5-2;A0A087WWP8;Q6PCB5;Q5VWQ0	RSBN1_HUMAN	RSBN1	Lysine-specific demethylase 9	22.0561	22.0115	21.9957	22.4004	22.1331	22.0842
	0.0067476	0.00420189	Q5VYK3	J3KN16;A0A804HJA4;Q5VYK3	ECM29_HUMAN	ECPAS	Proteasome adapter and scaffold protein ECM29	23.2635	23.1165	22.8127	23.3434	23.029	22.8077
	0.128593	-0.010224	Q5VYS8;Q5VYS8-6	Q5VYS8-2;Q5VYS8-3;Q5VYS8-4;Q5VYS8-5;Q5VYS8-6;Q5VYS9;Q5VYS8	TUT7_HUMAN	TUT7	Terminal uridylyltransferase 7	22.2697	22.3472	22.2672	22.2815	22.3253	22.308
	0.929689	-0.390422	Q5VZ89;Q5VZ89-7	Q5VZ89-3;Q5VZ89-5;Q5VZ89-7;R4GMN2;Q5VZ89	DEN4C_HUMAN	DENND4C	DENN domain-containing protein 4C	21.2794	21.1877	21.0323	21.2952	21.4672	21.9082
	0.507568	-0.180293	Q5VZE5	Q5VZE5	NAA35_HUMAN	NAA35	N-alpha-acetyltransferase 35, NatC auxiliary subunit	24.0746	24.0792	23.6594	24.2519	24.0823	24.0198
	0.0375832	0.0103569	Q5VZK9;Q5VZK9-2	A0A0U1RQQ1;Q5VZK9-2;A0A8V8TRE2;Q5VZK9	CARL1_HUMAN	CARMIL1	F-actin-uncapping protein LRRC16A	22.1603	22.1871	21.9793	22.1929	22.1336	21.9692
	0.533333	0.136916	Q5W0B1	Q5W0B1	OBI1_HUMAN	OBI1	ORC ubiquitin ligase 1	19.5341	19.5739	19.5797	19.6456	19.3547	19.2767
	0.071248	-0.0225563	Q5XG87	Q5XG87-2;A0A9H4DBI9;Q5XG87	PAPD7_HUMAN	TENT4A	Terminal nucleotidyltransferase 4A	21.4882	21.7299	21.4025	21.4633	21.5878	21.6372
	0.0972365	-0.074152	Q5XKP0	K7EIR2;A0A140TA84;A0A140TA86;Q5XKP0	MIC13_HUMAN	MICOS13	MICOS complex subunit MIC13	20.8329	20.7094	20.5628	21.2753	20.6616	20.3907
	0.0743056	0.0166276	Q63HN8	A0A0A0MTC1;A0A0A0MTR7;Q63HN8-4;Q63HN8	RN213_HUMAN	RNF213	E3 ubiquitin-protein ligase RNF213	23.8864	23.7808	23.9018	23.9627	23.8314	23.725
	0.288831	-0.457667	Q63ZY3;Q63ZY3-3	Q63ZY3-2;Q63ZY3-3;K7EIU4;Q63ZY3	KANK2_HUMAN	KANK2	KN motif and ankyrin repeat domain-containing protein 2	24.2877	25.6779	24.6734	24.3665	25.9119	25.7336
	0.168826	0.0809434	Q641Q2;Q641Q2-2;Q9Y4E1;Q9Y4E1-1;Q9Y4E1-2;Q9Y4E1-3;Q9Y4E1-4	J3KP36;E7ESD2;F8W7U3;Q9Y4E1-4;Q9Y4E1-5;Q9Y4E1-6;Q9Y4E1-1;Q9Y4E1-2;Q9Y4E1-3;A0A0A0MT65;Q641Q2-2;A0A087WYF6;Q9Y4E1;Q641Q2	WAC2A_HUMAN;WAC2C_HUMAN	WASHC2A;WASHC2C	WASH complex subunit 2A	21.5016	21.7266	21.3177	21.1644	21.6107	21.528
	0.271947	0.102305	Q659C4	D6R9W6;H0Y9K3;G3V0E9;Q659C4-3;Q659C4-9;A0A3B3ISF0;A0A3B3IT29;A0A994J4X5;A0A994J4H9;Q659C4	LAR1B_HUMAN	LARP1B	La-related protein 1B	23.5482	23.2529	23.0369	23.2139	23.1228	23.1944
	0.388776	-0.165981	Q66K14;Q66K14-2	H0YB08;Q66K14-2;Q66K14	TBC9B_HUMAN	TBC1D9B	TBC1 domain family member 9B	21.445	21.8968	21.853	21.9074	22.0797	21.7056
	0.0656065	0.0223026	Q66K74;Q66K74-2	Q66K74-2;Q66K74	MAP1S_HUMAN	MAP1S	Microtubule-associated protein 1S	21.7813	22.0512	21.8409	22.0399	21.7801	21.7864
	0.826128	0.361872	Q66K89	H3BUJ7;H3BSL4;H3BQZ4;Q66K89	E4F1_HUMAN	E4F1	Transcription factor E4F1	21.825	21.964	22.0554	21.4846	21.3171	21.9572
	1.06005	0.154874	Q66PJ3-1	F8WEP2;F8WCT1;A0A8C8KBE9;H7BZV4;Q66PJ3-1;Q66PJ3-2;Q66PJ3-3;Q66PJ3-4;Q66PJ3-5;Q66PJ3-7;Q66PJ3-9;F5GYV5;A0A0C4DG62;A0A0C4DH18;Q66PJ3-10;Q66PJ3	AR6P4_HUMAN	ARL6IP4	Isoform of Q66PJ3, Isoform 1 of ADP-ribosylation factor-like protein 6-interacting protein 4	26.9677	26.8141	26.8096	26.6208	26.7385	26.7676
	0.822155	-0.32916	Q684P5;Q684P5-2;Q684P5-3	A0A1B0GV05;Q684P5-2;Q684P5-3;A0A8V8TL16;A0A8V8TKZ8;Q684P5	RPGP2_HUMAN	RAP1GAP2	Rap1 GTPase-activating protein 2	21.3921	21.5165	20.9804	21.4829	21.6009	21.7927
	0.80429	-0.337452	Q68CP9;Q68CP9-3	Q68CP9-3;F8WCU9;F8W108;Q68CP9	ARID2_HUMAN	ARID2	AT-rich interactive domain-containing protein 2	20.0839	19.9304	19.5699	19.9642	20.3607	20.2717
	2.08351	-0.44604	Q68CQ4	Q68CQ4	UTP25_HUMAN	UTP25	U3 small nucleolar RNA-associated protein 25 homolog	23.4769	23.5539	23.7032	23.8978	24.0924	24.0819
	0.444735	0.391005	Q68CQ7	Q68CQ7	GL8D1_HUMAN	GLT8D1	Glycosyltransferase 8 domain-containing protein 1	22.9516	23.1263	22.9914	23.2774	22.6373	21.9816
	0.290423	0.117031	Q68D10;Q68D10-2	Q68D10-2;Q68D10-3;Q68D10	SPT2_HUMAN	SPTY2D1	Protein SPT2 homolog	24.8564	24.9353	24.9762	24.4991	24.8848	25.033
	0.0201787	-0.0106157	Q68DI1	Q8TAU3-2;M0R230;Q96SQ5-2;Q68DI1;Q96SQ5;Q8TAU3	ZN776_HUMAN	ZNF776	Zinc finger protein 776	20.0124	19.7099	19.7727	19.5685	19.8772	20.0811
	0.124996	0.0281111	Q68DK7	J3KSZ8;J3QQY0;Q68DK7	MSL1_HUMAN	MSL1	Male-specific lethal 1 homolog	19.99	20.2227	20.1209	20.0681	20.1715	20.0096
	1.39133	-0.228002	Q68E01-2	Q68E01-2;Q68E01	INT3_HUMAN	INTS3	Isoform of Q68E01, Isoform 2 of Integrator complex subunit 3	22.5438	22.5625	22.7403	22.9048	22.7586	22.8672
	0.0629631	0.0176652	Q68EM7;Q68EM7-2	C9IZD3;Q68EM7-2;Q68EM7-4;Q68EM7-5;Q68EM7-6;I3L4P0;I3L1S9;Q68EM7	RHG17_HUMAN	ARHGAP17	Rho GTPase-activating protein 17	24.9258	24.792	24.5969	24.7908	24.7232	24.7477
	0.547144	0.0766563	Q69YH5	E9PEI0;Q69YH5	CDCA2_HUMAN	CDCA2	Cell division cycle-associated protein 2	19.8046	19.9294	19.9513	19.8375	19.7383	19.8795
	1.31324	-0.603991	Q69YL0	Q69YL0	NCAS2_HUMAN	NCBP2AS2	Protein NCBP2AS2	22.1711	21.5875	21.5559	22.4069	22.4957	22.2239
	0.0897987	-0.0559546	Q69YN4;Q69YN4-3	Q69YN4-2;Q69YN4-3;Q69YN4-4;Q69YN4	VIR_HUMAN	VIRMA	Protein virilizer homolog	22.4948	21.8104	22.2195	22.2657	22.0461	22.3808
	0.252729	0.161453	Q69YQ0;Q69YQ0-2	C9J8U1;A0A494C1J1;Q69YQ0-2;F8WAN1;Q69YQ0	CYTSA_HUMAN	SPECC1L	Cytospin-A	22.4402	22.69	22.6091	22.8578	22.3766	22.0206
	0.127489	0.421048	Q69YU5	Q69YU5	UQCC6_HUMAN	UQCC6	Ubiquinol-cytochrome-c reductase complex assembly factor 6	24.0283	23.9251	23.8694	21.1001	24.7719	24.6876
	0.559883	0.423685	Q6AI08	K7EIX2;K7ELR8;K7ESP5;Q6AI08	HEAT6_HUMAN	HEATR6	HEAT repeat-containing protein 6	20.303	20.3579	19.4664	19.303	19.8936	19.6596
	0.371801	0.0873369	Q6DD87	Q6DD87	ZN787_HUMAN	ZNF787	Zinc finger protein 787	22.4927	22.5816	22.6208	22.3164	22.4862	22.6305
	0.503609	-0.115294	Q6DKI1	Q6DKI1-2;R4GMU7;Q6DKI1	RL7L_HUMAN	RPL7L1	Ribosomal protein uL30-like	26.1655	26.2036	26.3238	26.5219	26.2692	26.2478
	0.00551468	0.00797971	Q6DN12;Q6DN12-2	Q6DN12-2;Q6DN12-3;Q6DN12-4;Q6DN12	MCTP2_HUMAN	MCTP2	Multiple C2 and transmembrane domain-containing protein 2	21.282	21.3556	21.1862	22.1389	21.1418	20.5191
	0.0335789	-0.0226103	Q6IA86;Q6IA86-2;Q6IA86-3;Q6IA86-4;Q6IA86-5;Q6IA86-6;Q6IA86-7	Q6IA86-6;Q6IA86-7;Q6IA86-2;Q6IA86-3;Q6IA86-4;Q6IA86-5;Q6IA86	ELP2_HUMAN	ELP2	Elongator complex protein 2	19.6782	20.1848	19.6866	19.7065	19.731	20.1799
	1.33933	1.16268	Q6IAN0	A0A0C4DGQ8;Q6IAN0	DRS7B_HUMAN	DHRS7B	Dehydrogenase/reductase SDR family member 7B	21.5574	20.6637	20.8653	19.3008	20.3367	19.9608
	0.563342	-1.58536	Q6IBW4;Q6IBW4-4	Q6IBW4-2;Q6IBW4-4;A0A0A6YYG7;E5RJN3;Q6IBW4	CNDH2_HUMAN	NCAPH2	Condensin-2 complex subunit H2	20.569	20.811	21.2976	24.9276	21.4649	21.0411
	1.46512	0.283194	Q6IE81;Q6IE81-2	D6RFK0;D6RGE7;Q6IE81-3;Q6IE81-2;Q6IE81	JADE1_HUMAN	JADE1	Protein Jade-1	22.808	22.8546	22.8647	22.4126	22.5484	22.7168
	0.471154	0.170755	Q6IEG0	Q6IEG0	SNR48_HUMAN	SNRNP48	U11/U12 small nuclear ribonucleoprotein 48 kDa protein	22.9779	22.8449	23.0026	22.5741	22.6753	23.0636
	0.289115	-0.124839	Q6IN84	Q6IN84	MRM1_HUMAN	MRM1	rRNA methyltransferase 1, mitochondrial	22.7394	22.8533	22.7536	23.2401	22.6753	22.8054
	1.1859	0.150514	Q6IQ21	Q6IQ21	ZN770_HUMAN	ZNF770	Zinc finger protein 770	23.5504	23.4263	23.4462	23.2794	23.277	23.4149
	0.382577	0.321047	Q6IQ49;Q6IQ49-2;Q6IQ49-3	Q6IQ49-2;Q6IQ49-3;Q6IQ49	SDE2_HUMAN	SDE2	Splicing regulator SDE2	20.7829	21.4554	21.3189	20.2961	21.2178	21.0802
	0.288403	0.136576	Q6KB66;Q6KB66-2	Q6KB66-2;Q6KB66-3;Q6KB66	K2C80_HUMAN	KRT80	Keratin, type II cytoskeletal 80	21.3751	21.535	20.9286	21.1304	21.2537	21.0448
	0.377888	0.187282	Q6KC79;Q6KC79-2	A0A590UJS4;Q6KC79-2;Q6KC79	NIPBL_HUMAN	NIPBL	Nipped-B-like protein	20.4031	20.0484	19.7443	19.8216	19.7693	20.043
	0.120492	-0.109949	Q6N069	Q6N069	NAA16_HUMAN	NAA16	N-alpha-acetyltransferase 16, NatA auxiliary subunit	20.4545	20.9372	19.9657	20.911	20.4609	20.3154
	0.189094	-0.174868	Q6NS38	S4R3T5;F5GZZ0;Q6NS38-2;F5H5X2;Q6NS38	ALKB2_HUMAN	ALKBH2	DNA oxidative demethylase ALKBH2	20.0585	20.1449	19.863	20.7712	20.2374	19.5823
	0.477161	-0.169065	Q6NUJ5	Q6NUJ5-2;Q6NUJ5	PWP2B_HUMAN	PWWP2B	PWWP domain-containing protein 2B	20.4404	20.7839	20.779	20.852	20.6504	21.0081
	0.236261	0.15925	Q6NUK4	Q6NUK4	REEP3_HUMAN	REEP3	Receptor expression-enhancing protein 3	24.0707	23.8578	23.3818	23.7756	23.2714	23.7855
	0.37236	-0.644384	Q6NUM9	H7C3J0;Q6NUM9	RETST_HUMAN	RETSAT	All-trans-retinol 13,14-reductase	21.1953	20.4845	20.9446	20.9421	22.9017	20.7138
	0.0735532	-0.0695712	Q6NUQ4	H7C0H8;Q6NUQ4-2;Q6NUQ4	TM214_HUMAN	TMEM214	Transmembrane protein 214	23.1887	23.0334	22.2399	23.1913	22.7989	22.6805
	0.0178213	-0.00835228	Q6NW34;Q6NW34-2	F8WDL7;F8WBQ8;Q6NW34-2;E9PFF8;Q6NW34	NEPRO_HUMAN	NEPRO	Nucleolus and neural progenitor protein	21.6088	21.9354	22.0562	21.7743	21.8181	22.033
	0.522005	0.298255	Q6NYC1;Q6NYC1-2;Q6NYC1-3	B2WTI3;B2WTI4;K7EJU9;Q6NYC1-2;Q6NYC1-3;Q6NYC1	JMJD6_HUMAN	JMJD6	Bifunctional arginine demethylase and lysyl-hydroxylase JMJD6	22.9466	23.0678	22.4605	22.8648	22.3691	22.3463
	0.921443	-0.628028	Q6NZ67	B8ZZ87;H7C293;Q6NZ67	MZT2B_HUMAN	MZT2B	Mitotic-spindle organizing protein 2B	21.416	21.3764	20.8747	21.4955	22.3722	21.6835
	0.966637	0.120154	Q6NZI2	Q6NZI2	CAVN1_HUMAN	CAVIN1	Caveolae-associated protein 1	23.6068	23.5073	23.6939	23.44	23.4939	23.5136
	1.14801	0.072497	Q6NZY4	Q6NZY4-2;F5GX80;F5H6J5;Q6NZY4	ZCHC8_HUMAN	ZCCHC8	Zinc finger CCHC domain-containing protein 8	22.3018	22.3578	22.3729	22.2615	22.2426	22.3109
	0.519333	0.244922	Q6P087;Q6P087-2	Q6P087-2;Q6P087	RUSD3_HUMAN	RPUSD3	Mitochondrial mRNA pseudouridine synthase RPUSD3	20.0885	20.6719	20.0311	20.0144	19.967	20.0753
	2.45884	-0.213051	Q6P158	H7C109;Q6P158	DHX57_HUMAN	DHX57	Putative ATP-dependent RNA helicase DHX57	28.1473	28.1356	28.208	28.4	28.3245	28.4055
	0.611654	-0.125437	Q6P1J9	A0A1B0GUB2;Q6P1J9	CDC73_HUMAN	CDC73	Parafibromin	28.2246	28.2348	28.0489	28.4337	28.2309	28.22
	0.114501	-0.0426826	Q6P1L5	Q6P1L5-2;Q6P1L5	F117B_HUMAN	FAM117B	Protein FAM117B	19.5759	19.3682	19.2793	19.3162	19.3825	19.6527
	0.0789188	0.0307395	Q6P1M0	Q6P1M0-2;Q6P1M0	S27A4_HUMAN	SLC27A4	Long-chain fatty acid transport protein 4	21.2626	21.0581	20.8179	21.1089	20.947	20.9905
	1.11291	0.177103	Q6P1M3;Q6P1M3-2	Q6P1M3-2;J3QRV5;Q6P1M3	L2GL2_HUMAN	LLGL2	LLGL scribble cell polarity complex component 2	22.0071	22.0847	21.8417	21.7582	21.8157	21.8282
	0.0296879	0.0325737	Q6P1Q0;Q6P1Q0-7	H0YIV5;F8VZA2;F8VVQ3;F8VP71;Q6P1Q0-2;Q6P1Q0-4;Q6P1Q0-7;Q6P1Q0	LTMD1_HUMAN	LETMD1	LETM1 domain-containing protein 1	23.9001	23.3251	22.861	23.6823	23.364	22.9421
	2.05553	0.180403	Q6P1X5	A0A8I5QJR0;H0YC37;A0A8I5KUQ2;A0A8I5KSY6;A0A8I5KV60;Q6P1X5	TAF2_HUMAN	TAF2	Transcription initiation factor TFIID subunit 2	24.2226	24.1299	24.1849	24.0434	24.001	23.9517
	0.149438	-0.188142	Q6P2E9	Q6P2E9-2;Q6P2E9	EDC4_HUMAN	EDC4	Enhancer of mRNA-decapping protein 4	21.0259	20.4485	21.5458	21.3905	21.6716	20.5224
	0.558196	-0.036293	Q6P2Q9	I3L3Z8;I3L0J9;A0A994J6E8;A0A994J491;Q6P2Q9	PRP8_HUMAN	PRPF8	Pre-mRNA-processing-splicing factor 8	25.5623	25.5043	25.4687	25.563	25.5503	25.5308
	0.270454	0.190486	Q6P3W7	A0A0U1RQQ9;Q6P3W7	SCYL2_HUMAN	SCYL2	SCY1-like protein 2	21.3909	21.3688	21.4575	20.6546	21.523	21.4682
	0.0757617	0.0347182	Q6P3X3	Q6P3X3	TTC27_HUMAN	TTC27	Tetratricopeptide repeat protein 27	21.5454	22.0681	21.8333	21.72	21.8922	21.7305
	0.00289075	-0.000477473	Q6P5R6	C9JYQ9;H0Y8C2;Q6P5R6	RL22L_HUMAN	RPL22L1	Ribosomal protein eL22-like	28.0346	27.9801	28.0251	27.9154	28.0882	28.0377
	0.777461	-0.0987822	Q6P5Z2	Q6P5Z2	PKN3_HUMAN	PKN3	Serine/threonine-protein kinase N3	21.2992	21.4125	21.387	21.3956	21.5558	21.4437
	0.634128	0.654852	Q6P996;Q6P996-4;Q6P996-5	Q6XYB5;H3BND4;Q86XE2;Q6P996-3;Q6P996-4;Q6P996-5;Q6P996	PDXD1_HUMAN	PDXDC1	Pyridoxal-dependent decarboxylase domain-containing protein 1	21.577	20.8631	21.1784	21.0583	20.8717	19.7241
	0.130331	-0.0501919	Q6PCB5	Q6PCB5	RSBNL_HUMAN	RSBN1L	Lysine-specific demethylase RSBN1L	24.5246	24.2139	24.4614	24.3147	24.3787	24.657
	0.0515459	-0.0223389	Q6PCT2;Q6PCT2-2	H3BVB1;H3BPZ0;H3BME1;Q6PCT2-2;Q6PCT2-3;H7C112;Q6PCT2	FXL19_HUMAN	FBXL19	F-box/LRR-repeat protein 19	19.5577	19.2947	19.515	19.5908	19.6146	19.2291
	0.178277	-0.0826035	Q6PD62	Q6PD62	CTR9_HUMAN	CTR9	RNA polymerase-associated protein CTR9 homolog	27.9239	27.8855	27.5908	28.1356	27.8646	27.6478
	0.281357	0.15154	Q6PGN9-2	Q6PGN9-2;Q6PGN9-4;Q6PGN9	PSRC1_HUMAN	PSRC1	Isoform of Q6PGN9, Isoform A of Proline/serine-rich coiled-coil protein 1	22.1214	21.6844	21.4664	21.781	21.4356	21.6011
	0.19701	0.0342464	Q6PGP7	D6RCE2;H0Y915;A0A8V8TN92;A0A8V8TNA2;A0A8V8TNJ4;A0A8V8TNJ9;A0A8V8TNK4;A0A8V8TNK9;A0A8V8TLR0;A0A8V8TLS3;A0A8V8TLT2;A0A8V8TLT7;A0A8V8TLU2;A0A8V8TLU5;A0A8V8TM98;A0A8V8TMA3;A0A8V8TMA8;A0A8V8TMB2;Q6PGP7	SKI3_HUMAN	SKIC3	Superkiller complex protein 3	27.6348	27.6384	27.6738	27.4943	27.6297	27.7202
	0.0347808	0.0247695	Q6PIY7;Q6PIY7-2	D6RAF2;Q6PIY7-2;Q6PIY7	GLD2_HUMAN	TENT2	Poly(A) RNA polymerase GLD2	21.9465	22.3441	21.9777	22.1956	22.3342	21.6641
	0.751577	-0.229954	Q6PJG2	A0A1C7CYX1;Q6PJG2	MDEAS_HUMAN	MIDEAS	Mitotic deacetylase-associated SANT domain protein	23.7145	23.6235	23.857	24.1884	23.7654	23.9311
	0.330367	0.978584	Q6PJG6	Q6PJG6-3;Q6PJG6	BRAT1_HUMAN	BRAT1	BRCA1-associated ATM activator 1	21.3348	20.0762	24.0236	20.3683	21.5504	20.5802
	0.0425848	0.0229797	Q6PJP8	Q6PJP8	DCR1A_HUMAN	DCLRE1A	DNA cross-link repair 1A protein	20.6989	20.3914	20.3821	20.3052	20.3275	20.7708
	0.161985	-0.0308158	Q6PK04	I3L4F6;I3L0U5;Q6PK04	CC137_HUMAN	CCDC137	Coiled-coil domain-containing protein 137	25.3551	25.3215	25.1756	25.3018	25.2432	25.3995
	1.79681	-0.126176	Q6PKG0	A0A8I5KSP1;A0A8I5KWU3;Q6PKG0-3;Q6PKG0	LARP1_HUMAN	LARP1	La-related protein 1	29.5395	29.6195	29.5425	29.7051	29.716	29.6591
	1.0458	0.166209	Q6PL18	Q6PL18	ATAD2_HUMAN	ATAD2	ATPase family AAA domain-containing protein 2	23.7684	23.728	23.561	23.5137	23.4547	23.5904
	0.267141	0.0621611	Q6R327;Q6R327-3	D6R9S6;Q6R327-3;Q6R327-4;Q6R327	RICTR_HUMAN	RICTOR	Rapamycin-insensitive companion of mTOR	22.4023	22.5487	22.2539	22.3015	22.4146	22.3023
	0.989246	0.101257	Q6RFH5	Q6RFH5-2;F5GYL6;Q6RFH5	WDR74_HUMAN	WDR74	WD repeat-containing protein 74	24.5471	24.4489	24.426	24.3924	24.3131	24.4127
	0.329018	0.163285	Q6SJ93	Q6SJ93-2;Q6SJ93	F111B_HUMAN	FAM111B	Serine protease FAM111B	22.4174	22.368	21.8234	22.173	21.9169	22.0291
	0.0217935	0.00623957	Q6SPF0	E9PIW9;Q6SPF0	SAMD1_HUMAN	SAMD1	Sterile alpha motif domain-containing protein 1	21.6827	21.5753	21.6663	21.8138	21.5555	21.5362
	1.65569	-0.410061	Q6U841;Q6U841-2;Q6U841-3	C9J240;E7EW28;Q6U841-2;Q6U841-3;Q6U841	S4A10_HUMAN	SLC4A10	Sodium-driven chloride bicarbonate exchanger	28.7463	28.6618	28.5912	28.9213	29.2729	29.0352
	0.624923	-0.321606	Q6UB35	B7ZM99;A0A087WVM4;Q6UB35	C1TM_HUMAN	MTHFD1L	Monofunctional C1-tetrahydrofolate synthase, mitochondrial	21.9654	21.7728	22.1305	21.864	22.4666	22.5029
	0.175242	0.0694949	Q6UB99	A0A2R8Y438;Q6UB99	ANR11_HUMAN	ANKRD11	Ankyrin repeat domain-containing protein 11	22.5664	22.4447	22.2489	22.4309	22.1171	22.5035
	0.449192	0.20963	Q6UN15	H0Y8P7;Q6UN15-3;Q6UN15-5;A0A994J6R0;A0A994J6B4;A0A994J6B8;A0A994J6N5;A0A994J6P0;A0A994J6P8;A0A994J6Q2;A0A994J6C6;A0A994J6C9;A0A994J6E0;A0A994J6E2;A0A994J3T5;A0A994J453;A0A994J458;A0A994J464;A0A994J469;A0A994J474;A0A994J3L5;A0A994J3M0;A0A994J3P6;A0A994J3R0;A0A994J3R5;A0A994J3S0;A0A994J3S6;A0A994J438;A0A994J442;A0A994J3I9;A0A994J3J1;A0A994J3K1;A0A994J3K5;Q6UN15	FIP1_HUMAN	FIP1L1	Pre-mRNA 3'-end-processing factor FIP1	24.0516	23.8007	23.4971	23.8099	23.4994	23.4112
	0.533889	0.101067	Q6UUV7	Q6UUV7-3;Q6UUV7	CRTC3_HUMAN	CRTC3	CREB-regulated transcription coactivator 3	21.2923	21.4687	21.3599	21.1797	21.2384	21.3996
	0.340357	0.343325	Q6UWP7;Q6UWP7-3	Q6UWP7-3;Q6UWP7	LCLT1_HUMAN	LCLAT1	Lysocardiolipin acyltransferase 1	21.8457	21.4378	20.8697	21.5582	21.0675	20.4976
	0.104279	0.0394637	Q6UX04	D6REK3;Q6UX04-2;A0A8I5KP46;A0A8I5KPF6;A0A8I5KQW2;A0A8I5KQK1;A0A8I5KRH9;A0A8I5KRF5;A0A8I5KU89;A0A8I5KST0;A0A8I5KT14;A0A8I5KX65;A0A8I5KUW8;A0A8I5KW10;A0A8I5KZ67;A0A8I5KXM7;Q6UX04	CWC27_HUMAN	CWC27	Spliceosome-associated protein CWC27 homolog	23.0517	22.8628	22.997	23.1392	22.9443	22.7096
	0.1875	-0.0532894	Q6UXN9	Q6UXN9	WDR82_HUMAN	WDR82	WD repeat-containing protein 82	25.4427	25.2772	25.6191	25.4093	25.5388	25.5509
	0.0569813	-0.0495211	Q6VN20;Q6VN20-3	R4GNA3;R4GMX7;R4GMX8;R4GN91;Q6VN20-3;Q6VN20	RBP10_HUMAN	RANBP10	Ran-binding protein 10	19.0204	19.749	19.6582	19.2485	19.8994	19.4284
	0.0803121	0.0272681	Q6VY07	B4DF77;E9PNZ9;Q6VY07-2;Q6VY07	PACS1_HUMAN	PACS1	Phosphofurin acidic cluster sorting protein 1	22.1988	22.218	21.8835	21.9759	22.0937	22.1489
	0.599584	0.0684471	Q6WCQ1-2	J3KSW8;H0Y2S9;A0A494BZV2;Q6WCQ1-2;Q6WCQ1-3;Q6WCQ1	MPRIP_HUMAN	MPRIP	Isoform of Q6WCQ1, Isoform 2 of Myosin phosphatase Rho-interacting protein	24.8802	25.0197	25.0257	24.8755	24.9046	24.9403
	0.49602	0.428816	Q6WKZ4;Q6WKZ4-3	Q6WKZ4-3;Q6WKZ4-5;Q6WKZ4	RFIP1_HUMAN	RAB11FIP1	Rab11 family-interacting protein 1	22.573	22.809	22.6968	22.942	21.6638	22.1865
	0.455648	-0.195543	Q6Y1H2	C9JWG1;H7C4K8;Q6Y1H2	HACD2_HUMAN	HACD2	Very-long-chain (3R)-3-hydroxyacyl-CoA dehydratase 2	22.8704	22.5991	22.5905	23.1922	22.8002	22.6542
	0.265042	0.170351	Q6Y2X3	H0YHG0;Q6Y2X3	DJC14_HUMAN	DNAJC14	DnaJ homolog subfamily C member 14	23.0854	22.4603	22.2925	22.6177	22.3578	22.3517
	0.406364	0.0706666	Q6Y7W6;Q6Y7W6-4;Q6Y7W6-5	I1E4Y6;C9J0V6;E7ESB6;C9JXQ0;F8WCD5;C9JPV7;C9JRZ2;Q6Y7W6-3;Q6Y7W6-4;Q6Y7W6-5;C9JHW1;C9JHT0;Q6Y7W6	GGYF2_HUMAN	GIGYF2	GRB10-interacting GYF protein 2	25.2103	25.1602	25.1193	25.0111	25.037	25.2296
	0.448984	-0.120111	Q6YHK3	Q6YHK3-2;Q6YHK3-4;Q6YHK3	CD109_HUMAN	CD109	CD109 antigen	22.4586	22.714	22.8135	22.8502	22.8006	22.6955
	0.478077	0.709173	Q6YN16	Q6YN16-2;Q6YN16	HSDL2_HUMAN	HSDL2	Hydroxysteroid dehydrogenase-like protein 2	22.6723	23.2595	23.5775	23.1676	22.9185	21.2957
	0.149851	-0.0414327	Q6ZN18;Q6ZN18-2;Q6ZN18-3	Q6ZN18-2;Q6ZN18-3;G5EA50;F5GZR7;A0A669KBL4;A0A669KBC9;Q6ZN18	AEBP2_HUMAN	AEBP2	Zinc finger protein AEBP2	20.3894	20.4233	20.4267	20.5175	20.2544	20.5918
	0.597116	0.176704	Q6ZN55	Q6ZN55-2;A0A0C4DFM2;Q6ZN55	ZN574_HUMAN	ZNF574	Zinc finger protein 574	21.7488	21.7017	21.7482	21.595	21.3116	21.762
	0.710213	0.555387	Q6ZN66;Q8N8V2;Q96PP9	A0A3B3IRS3;Q96PP9;Q6ZN66;Q8N8V2	GBP4_HUMAN;GBP6_HUMAN;GBP7_HUMAN	GBP4;GBP6;GBP7	Guanylate-binding protein 6	23.2964	22.3872	22.4446	22.4343	22.2678	21.76
	0.612793	-0.299657	Q6ZNA4;Q6ZNA4-2;Q6ZNA4-3;Q6ZNA4-4	Q6ZNA4-2;Q6ZNA4-3;Q6ZNA4-4;Q6ZNA4	RN111_HUMAN	RNF111	E3 ubiquitin-protein ligase Arkadia	22.1091	22.1857	21.9093	22.7627	22.0858	22.2545
	0.53277	0.250411	Q6ZNW5	H0YN11;A0A286YET3;Q6ZNW5	GDPP1_HUMAN	GDPGP1	GDP-D-glucose phosphorylase 1	24.4198	24.1805	23.7196	23.8055	23.8922	23.8711
	0.339128	0.402034	Q6ZQQ6;Q6ZQQ6-2	Q6ZQQ6-2;E7ESW6;Q6ZQQ6	WDR87_HUMAN	WDR87	WD repeat-containing protein 87	27.6519	27.3121	26.1997	27.0392	26.2828	26.6356
	0.570362	-0.28046	Q6ZRQ5	E2QRD4;Q6ZRQ5	MMS22_HUMAN	MMS22L	Protein MMS22-like	19.6282	19.706	19.7882	19.945	19.6411	20.3778
	0.229344	-0.0920493	Q6ZRS2;Q6ZRS2-2;Q6ZRS2-3	Q6ZRS2-2;Q6ZRS2-3;A0A087X0E3;A0A0C4DFX4;Q6ZRS2	SRCAP_HUMAN	SRCAP	Helicase SRCAP	23.8877	23.7559	23.6368	24.1312	23.7077	23.7177
	0.20317	-0.10661	Q6ZRV2	J3KPS2;A0A494C1T9;Q6ZRV2	FA83H_HUMAN	FAM83H	Protein FAM83H	21.1534	21.3397	21.3602	21.7582	21.1131	21.3017
	1.11955	-0.283736	Q6ZRY4	Q6ZRY4	RBPS2_HUMAN	RBPMS2	RNA-binding protein with multiple splicing 2	20.0241	20.3181	20.0282	20.5424	20.3178	20.3614
	0.0087182	-0.00832431	Q6ZSJ8	Q6ZSJ8	CA122_HUMAN	C1orf122	Uncharacterized protein C1orf122	22.4608	22.131	22.0021	22.5068	22.4711	21.641
	0.80186	0.209459	Q6ZUT1;Q6ZUT1-2	Q6ZUT1-2;Q6ZUT1-3;E9PSC8;E9PQL5;E9PKA8;Q6ZUT1	NKAP1_HUMAN	NKAPD1	Uncharacterized protein NKAPD1	23.0246	23.2008	22.9807	23.0521	22.8107	22.715
	1.368	0.357931	Q6ZUT6;Q6ZUT6-4	Q6ZUT6-3;Q6ZUT6-4;H0YM82;Q6ZUT6	CCD9B_HUMAN	CCDC9B	Coiled-coil domain-containing protein 9B	20.9683	20.6892	20.8627	20.6189	20.5181	20.3093
	1.002	-0.202284	Q6ZW31	Q6ZW31-2;Q6ZW31	SYDE1_HUMAN	SYDE1	Rho GTPase-activating protein SYDE1	21.8302	21.9504	21.9812	22.2868	22.0213	22.0605
	0.00441962	0.00212097	Q6ZXV5;Q6ZXV5-2	Q6ZXV5-2;Q6ZXV5	TMTC3_HUMAN	TMTC3	Protein O-mannosyl-transferase TMTC3	21.9295	21.7371	21.521	21.7511	21.5366	21.8935
	0.518153	-0.425531	Q6ZYL4	Q6ZYL4	TF2H5_HUMAN	GTF2H5	General transcription factor IIH subunit 5	20.6205	21.7837	21.5601	21.8181	21.7833	21.6394
	0.249435	0.0589911	Q709F0	Q709F0-3;Q709F0	ACD11_HUMAN	ACAD11	Acyl-CoA dehydrogenase family member 11	23.2056	23.2427	23.1974	23.3224	23.0021	23.1442
	0.285017	0.13494	Q70E73	Q70E73-2;Q70E73-5;C9J164;Q70E73	RAPH1_HUMAN	RAPH1	Ras-associated and pleckstrin homology domains-containing protein 1	21.0716	21.2759	21.1425	20.6859	21.0964	21.3029
	0.0497669	-0.0495574	Q70EL1	Q70EL1-6;Q70EL1-7;A0A7P0T9K1;A0A7P0T9N2;A0A804D9U3;R4GN32;H7C296;H7C1E9;A0A8I5KNN9;A0A8I5KTP4;A0A8I5KYV7;A0A8I5KYW2;Q70EL1	UBP54_HUMAN	USP54	Inactive ubiquitin carboxyl-terminal hydrolase 54	21.723	21.2634	21.0938	21.6769	20.8391	21.7129
	0.0553545	-0.0411154	Q70EL4;Q70EL4-4	Q70EL4-4;Q70EL4	UBP43_HUMAN	USP43	Ubiquitin carboxyl-terminal hydrolase 43	21.0636	21.1089	20.8	21.507	20.7947	20.7942
	0.0205029	0.0211341	Q70UQ0-4	Q70UQ0-4	IKIP_HUMAN	IKBIP	Isoform of Q70UQ0, Isoform 4 of Inhibitor of nuclear factor kappa-B kinase-interacting protein	22.7584	22.5425	22.4745	23.0907	22.6699	21.9513
	0.961162	0.199687	Q71DI3	B4DEB1;A0A590UJJ6;K7EK07;K7EMV3;K7EP01;K7ES00;P84243;Q5TEC6;Q71DI3;P68431;Q6NXT2;Q16695	H32_HUMAN	H3C13	Histone H3.2	33.6974	33.4998	33.4425	33.2308	33.3847	33.4251
	0.040222	0.04135	Q71F23;Q71F23-3	D6R9S4;Q09GN1;Q71F23-3;Q71F23	CENPU_HUMAN	CENPU	Centromere protein U	21.537	21.3417	20.6729	21.4801	20.6984	21.2491
	0.724441	0.0822493	Q71RC2;Q71RC2-4	Q71RC2-2;Q71RC2-3;Q71RC2-4;Q71RC2-5;Q71RC2-6;Q71RC2-7;X6RLN4;A0A8I5KVU2;A0A8I5KWN8;Q96J85;Q71RC2;Q92615	LARP4_HUMAN	LARP4	La-related protein 4	27.6754	27.7178	27.6188	27.6182	27.644	27.503
	0.254277	0.0712458	Q71UM5	H0YMV8;C9JLI6;Q71UM5	RS27L_HUMAN	RPS27L	Ribosomal protein eS27-like	30.1027	30.216	30.2018	29.9337	30.0768	30.2962
	0.0392546	-0.034846	Q75N03;Q75N03-2	Q75N03-2;F8WEM5;C9K074;Q75N03	HAKAI_HUMAN	CBLL1	E3 ubiquitin-protein ligase Hakai	21.5403	21.0562	20.5008	21.0536	21.1202	21.028
	0.169453	0.145983	Q765P7	Q765P7	MTSS2_HUMAN	MTSS2	Protein MTSS 2	19.303	19.6186	19.585	18.7416	19.5978	19.7293
	1.13882	-0.211414	Q7KZ85	Q7KZ85-2;Q7KZ85	SPT6H_HUMAN	SUPT6H	Transcription elongation factor SPT6	26.5226	26.5829	26.7999	26.8065	26.8465	26.8866
	0.22978	-0.0879911	Q7KZF4	Q7KZF4	SND1_HUMAN	SND1	Staphylococcal nuclease domain-containing protein 1	23.6416	23.5003	23.495	23.3565	23.7171	23.8273
	1.04959	0.209489	Q7KZI7-14	E7ETY4;E9PC69;A0A0A0MRU9;Q7KZI7-2;Q7KZI7-3;Q7KZI7-4;Q7KZI7-5;Q7KZI7-6;Q7KZI7-7;Q7KZI7-8;Q7KZI7-9;A0A7I2YQF3;A0A7I2YQR3;Q7KZI7-10;Q7KZI7-11;Q7KZI7-12;Q7KZI7-13;Q7KZI7-14;Q7KZI7-15;Q7KZI7-16;Q7KZI7	MARK2_HUMAN	MARK2	Isoform of Q7KZI7, Isoform 14 of Serine/threonine-protein kinase MARK2	24.747	24.7306	24.4787	24.3922	24.4247	24.511
	1.84595	0.106605	Q7L014	A0A0C4DG89;Q7L014	DDX46_HUMAN	DDX46	Probable ATP-dependent RNA helicase DDX46	28.5075	28.4834	28.5292	28.4353	28.3596	28.4054
	0.285207	0.0462214	Q7L0Y3	Q7L0Y3	TM10C_HUMAN	TRMT10C	tRNA methyltransferase 10 homolog C	25.8294	25.8125	25.8398	25.89	25.7876	25.6655
	0.949962	0.384777	Q7L1Q6;Q7L1Q6-3;Q7L1Q6-4	C9IZ80;Q7L1Q6-2;Q7L1Q6-3;Q7L1Q6-4;Q7L1Q6	5MP2_HUMAN	BZW1	eIF5-mimic protein 2	23.8317	23.373	23.2844	23.2079	23.1839	22.9429
	1.38106	-0.105583	Q7L2E3	Q7L2E3-2;Q7L2E3-3;H7BXY3;Q7L2E3	DHX30_HUMAN	DHX30	ATP-dependent RNA helicase DHX30	26.7729	26.8565	26.8831	26.9169	26.9556	26.9568
	0.0337253	0.0349242	Q7L2E3-2	Q7L2E3-2	DHX30_HUMAN	DHX30	Isoform of Q7L2E3, Isoform 2 of ATP-dependent RNA helicase DHX30	24.3753	23.6955	24.0315	23.5715	23.8748	24.5513
	0.659662	-0.313031	Q7L2H7	J3KNJ2;E9PN86;Q7L2H7	EIF3M_HUMAN	EIF3M	Eukaryotic translation initiation factor 3 subunit M	27.5489	28.0307	28.2765	28.2753	28.2985	28.2215
	0.381076	0.0548808	Q7L2J0	Q7L2J0	MEPCE_HUMAN	MEPCE	7SK snRNA methylphosphate capping enzyme	25.9734	25.8655	25.9572	25.9613	25.883	25.7872
	1.47913	0.142599	Q7L3S4	Q7L3S4	ZN771_HUMAN	ZNF771	Zinc finger protein 771	23.6547	23.609	23.6832	23.4291	23.5348	23.5553
	0.408365	0.12555	Q7L4I2	Q7L4I2-2;Q7L4I2	RSRC2_HUMAN	RSRC2	Arginine/serine-rich coiled-coil protein 2	26.823	26.896	26.9042	26.9234	26.8237	26.4996
	0.0877003	-0.0380198	Q7L576	A0A0G2JR96;A0A0G2JQT1;A0A087WVZ5;Q7L576	CYFP1_HUMAN	CYFIP1	Cytoplasmic FMR1-interacting protein 1	23.0012	23.1336	22.675	23.111	22.9449	22.8679
	0.147273	-0.0712344	Q7L7X3	Q7L7X3-2;Q7L7X3-3;Q7L7X3	TAOK1_HUMAN	TAOK1	Serine/threonine-protein kinase TAO1	22.7984	22.7225	22.3781	22.9165	22.713	22.4833
	0.595455	0.32655	Q7L8L6	Q7L8L6	FAKD5_HUMAN	FASTKD5	FAST kinase domain-containing protein 5, mitochondrial	22.4785	22.1645	21.7727	22.0354	21.8344	21.5663
	0.799318	-0.231677	Q7LBC6	Q7LBC6-2;Q7LBC6	KDM3B_HUMAN	KDM3B	Lysine-specific demethylase 3B	21.6404	22.0162	21.6548	22.0052	21.9085	22.0928
	0.234877	0.0625598	Q7LGA3	A0A8I5QKN0;A0A8I5KW95;Q7LGA3-2;Q7LGA3	HS2ST_HUMAN	HS2ST1	Heparan sulfate 2-O-sulfotransferase 1	22.0893	21.912	21.8493	21.8153	22.0398	21.8077
	0.462794	0.199977	Q7LGC8	Q7LGC8	CHST3_HUMAN	CHST3	Carbohydrate sulfotransferase 3	19.7411	19.7705	19.8823	19.3161	19.5404	19.9376
	1.69798	-0.691843	Q7RTP6	J3QQT0;Q7RTP6	MICA3_HUMAN	MICAL3	[F-actin]-monooxygenase MICAL3	22.5338	22.7728	22.3258	22.9772	23.3191	23.4117
	0.640884	-0.0526428	Q7RTV0	Q7RTV0	PHF5A_HUMAN	PHF5A	PHD finger-like domain-containing protein 5A	25.3365	25.3653	25.3784	25.4812	25.3665	25.3904
	0.507789	0.25135	Q7Z2E3;Q7Z2E3-7	Q7Z2E3-2;Q7Z2E3-3;Q7Z2E3-4;Q7Z2E3-5;Q7Z2E3-6;Q7Z2E3-7;Q7Z2E3-8;Q7Z2E3-9;C9J8U3;A0A0A0MRW7;A0A5K1VW64;Q7Z2E3-10;Q7Z2E3-11;Q7Z2E3	APTX_HUMAN	APTX	Aprataxin	23.1105	22.9881	22.6628	22.987	22.4027	22.6177
	0.441566	0.283161	Q7Z2K6	A0A8I5QJH1;A0A8I5QL16;A0A8I5QJT4;E7ER77;A0A8I5KUT1;A0A8I5KYJ3;A0A8I5KWW9;A0A8I5KXJ0;Q7Z2K6	ERMP1_HUMAN	ERMP1	Endoplasmic reticulum metallopeptidase 1	22.0592	22.0163	21.6344	22.0949	21.4424	21.3231
	1.67536	0.266041	Q7Z2T5	Q7Z2T5	TRM1L_HUMAN	TRMT1L	TRMT1-like protein	23.4986	23.3483	23.2532	23.117	23.0811	23.1039
	1.49032	0.109716	Q7Z2W4	C9J6P4;Q7Z2W4-2;Q7Z2W4-3;Q7Z2W4	ZCCHV_HUMAN	ZC3HAV1	Zinc finger CCCH-type antiviral protein 1	26.6315	26.6308	26.6563	26.4741	26.5884	26.527
	0.677355	-0.356539	Q7Z2W4-3	C9J6P4;Q7Z2W4-3	ZCCHV_HUMAN	ZC3HAV1	Isoform of Q7Z2W4, Isoform 3 of Zinc finger CCCH-type antiviral protein 1	27.2761	27.5074	27.8028	27.5177	28.0906	28.0477
	0.244399	0.341867	Q7Z304	A0A0G2JQ91;Q7Z304	MAMC2_HUMAN	MAMDC2	MAM domain-containing protein 2	21.4475	21.6041	20.0304	20.931	20.2171	20.9082
	0.761712	0.21323	Q7Z333;Q7Z333-4	Q7Z333-3;Q7Z333-4;X6RI79;Q7Z333	SETX_HUMAN	SETX	Probable helicase senataxin	22.4754	22.3183	22.0458	22.12	22.0209	22.0588
	0.0281653	0.0216618	Q7Z3E2	Q7Z3E2	CC186_HUMAN	CCDC186	Coiled-coil domain-containing protein 186	25.5726	26.0786	26.0874	25.507	26.0319	26.1347
	0.783056	0.208452	Q7Z3K3;Q7Z3K3-2;Q7Z3K3-3;Q7Z3K3-5;Q7Z3K3-6;Q7Z3K3-7	A0A8V8TQQ8;A0A8V8TQ67;Q7Z3K3-2;Q7Z3K3-3;Q7Z3K3-5;Q7Z3K3-6;Q7Z3K3-7;Q7Z3K3	POGZ_HUMAN	POGZ	Pogo transposable element with ZNF domain	21.4338	21.2411	21.2015	21.2192	21.1423	20.8894
	0.435554	0.374631	Q7Z3U7	A0A286YFF8;Q7Z3U7-2;Q7Z3U7-3;Q7Z3U7-5;Q7Z3U7-6;Q7Z3U7	MON2_HUMAN	MON2	Protein MON2 homolog	22.9722	21.9402	21.8613	22.0012	21.937	21.7115
	0.114426	0.0897414	Q7Z406;Q7Z406-2;Q7Z406-6	M0QY43;Q7Z406-2;Q7Z406-4;Q7Z406-5;Q7Z406-6;Q7Z406	MYH14_HUMAN	MYH14	Myosin-14	26.7158	26.9548	27.1301	26.6996	27.3453	26.4866
	0.998565	0.215136	Q7Z417	Q7Z417	NUFP2_HUMAN	NUFIP2	FMR1-interacting protein NUFIP2	26.9904	26.9494	26.7075	26.6576	26.5873	26.757
	0.216476	0.0819887	Q7Z460;Q7Z460-2;Q7Z460-3;Q7Z460-4;Q7Z460-5	F8WA11;Q7Z460-2;Q7Z460-3;Q7Z460-4;Q7Z460-5;A0A8V8TRF6;A0A8V8TQK9;A0A8V8TLP7;Q7Z460	CLAP1_HUMAN	CLASP1	CLIP-associating protein 1	23.19	23.036	22.7722	23.0125	22.9867	22.753
	0.643972	0.0786978	Q7Z478	Q7Z478	DHX29_HUMAN	DHX29	ATP-dependent RNA helicase DHX29	24.6757	24.8356	24.7391	24.6344	24.6497	24.7302
	0.626756	0.345212	Q7Z4H7	Q7Z4H7-3;Q5SYF9;Q5VY60;Q7Z4H7	HAUS6_HUMAN	HAUS6	HAUS augmin-like complex subunit 6	20.6048	20.6183	20.2279	20.4928	20.1639	19.7586
	0.0325557	-0.0102768	Q7Z4Q2	Q7Z4Q2-2;A0A8I5KR70;Q7Z4Q2	HEAT3_HUMAN	HEATR3	HEAT repeat-containing protein 3	24.4515	24.4616	24.7302	24.4516	24.5877	24.6348
	0.724667	0.132273	Q7Z4S6;Q7Z4S6-2;Q7Z4S6-4;Q7Z4S6-5	H0YIM6;H0YHG9;H0YHT2;H0YI78;A0A1B0GV47;Q7Z4S6-2;Q7Z4S6-3;Q7Z4S6-4;Q7Z4S6-5;Q7Z4S6-6;Q7Z4S6	KI21A_HUMAN	KIF21A	Kinesin-like protein KIF21A	21.8987	21.9354	21.7945	21.6289	21.7261	21.8768
	1.65311	-0.186616	Q7Z4V5	Q7Z4V5-2;Q7Z4V5-3;Q7Z4V5-4;M0R0J3;Q7Z4V5;Q9Y3E1	HDGR2_HUMAN	HDGFL2	Hepatoma-derived growth factor-related protein 2	28.6797	28.7044	28.6492	28.9467	28.869	28.7774
	0.154566	-0.158151	Q7Z4V5-4	Q7Z4V5-2;Q7Z4V5-4	HDGR2_HUMAN	HDGFL2	Isoform of Q7Z4V5, Isoform 4 of Hepatoma-derived growth factor-related protein 2	22.7054	22.4564	22.5164	23.3653	22.0657	22.7218
	0.654695	0.1543	Q7Z5J4	A8MXE8;Q7Z5J4-2;Q7Z5J4-3;Q7Z5J4-4;Q7Z5J4	RAI1_HUMAN	RAI1	Retinoic acid-induced protein 1	21.8524	21.6244	21.6944	21.7173	21.4316	21.5595
	0.474243	0.0824394	Q7Z5K2;Q7Z5K2-2;Q7Z5K2-3	F6QZY1;Q7Z5K2-2;Q7Z5K2-3;Q7Z5K2	WAPL_HUMAN	WAPL	Wings apart-like protein homolog	18.5833	18.731	18.7228	18.5272	18.5504	18.7122
	0.455985	0.187368	Q7Z6B7;Q7Z6B7-2	Q7Z6B7-2;G5EA48;Q7Z6B7	SRGP1_HUMAN	SRGAP1	SLIT-ROBO Rho GTPase-activating protein 1	20.3867	20.2354	19.8153	20.0403	19.9564	19.8786
	2.1031	0.267747	Q7Z6E9	H3BUN0;H3BSK8;Q7Z6E9-2;Q7Z6E9-4;A0A087WY32;Q7Z6E9	RBBP6_HUMAN	RBBP6	E3 ubiquitin-protein ligase RBBP6	22.6607	22.5644	22.4727	22.2938	22.3011	22.2997
	0.572925	0.40801	Q7Z6G8	F8VVQ4;A0A804HKX1;J3QSU0;Q7Z6G8	ANS1B_HUMAN	ANKS1B	Ankyrin repeat and sterile alpha motif domain-containing protein 1B	22.9995	23.0203	22.0645	22.2255	22.3378	22.297
	1.23448	-0.229328	Q7Z6Z7;Q7Z6Z7-2;Q7Z6Z7-3	Q7Z6Z7-2;Q7Z6Z7-3;A0A994J483;Q7Z6Z7	HUWE1_HUMAN	HUWE1	E3 ubiquitin-protein ligase HUWE1	20.8994	20.8934	20.9927	21.0149	21.1628	21.2958
	0.568749	-1.4387	Q7Z736;Q7Z736-2;Q7Z736-3	X6R3U4;Q7Z736-2;Q7Z736-3;Q7Z736-4;Q7Z736	PKHH3_HUMAN	PLEKHH3	Pleckstrin homology domain-containing family H member 3	20.429	20.6438	20.8201	20.8063	21.1019	24.3008
	1.11724	0.404465	Q7Z739	A0A024R7W5;A0A087X0Q1;A0A087WY31;Q7Z739;Q9BYJ9	YTHD3_HUMAN	YTHDF3	YTH domain-containing family protein 3	24.3617	24.4016	24.4422	23.748	24.3188	23.9253
	0.492102	0.424156	Q7Z794	Q7Z794	K2C1B_HUMAN	KRT77	Keratin, type II cytoskeletal 1b	21.5506	21.4086	22.1164	21.7213	21.4	20.6818
	1.56417	0.22912	Q7Z7C8;Q7Z7C8-2	A0A8I5QJI2;A0A8I5QL33;A0A8I5QL44;B4DZU5;Q7Z7C8-2;Q7Z7C8-4;A0A0A0MRR3;A0A8I5KTT0;A0A8I5KVM3;A0A8I5KXI2;Q7Z7C8	TAF8_HUMAN	TAF8	Transcription initiation factor TFIID subunit 8	23.3373	23.3979	23.2566	23.0802	23.0213	23.203
	1.17413	0.309548	Q7Z7F7;Q7Z7F7-2	Q7Z7F7-2;Q7Z7F7	RM55_HUMAN	MRPL55	Large ribosomal subunit protein mL55	23.1117	23.0647	23.2186	22.7708	23.0425	22.6531
	1.81995	-0.390344	Q7Z7H8;Q7Z7H8-2	Q7Z7H8-2;Q7Z7H8	RM10_HUMAN	MRPL10	Large ribosomal subunit protein uL10m	21.7999	21.7388	21.8296	22.2541	21.9969	22.2883
	0.120258	0.0702044	Q7Z7K6	Q7Z7K6-3;Q7Z7K6-2;Q7Z7K6	CENPV_HUMAN	CENPV	Centromere protein V	21.5395	21.764	21.6422	21.1994	21.6428	21.8929
	0.94431	-0.255504	Q86SE5;Q86SE5-3	Q86SE5-3;B3KT61;E5RIX9;E5RG71;Q86SE5	RALYL_HUMAN	RALYL	RNA-binding Raly-like protein	24.461	24.2661	24.0509	24.5717	24.5461	24.4268
	0.178486	0.102101	Q86SF2	H0YAK0;H0YAH3;Q86SF2	GALT7_HUMAN	GALNT7	N-acetylgalactosaminyltransferase 7	22.3973	21.9446	22.0502	22.3444	21.9748	21.7666
	0.983305	0.192408	Q86SQ0;Q86SQ0-2;Q86SQ0-3	A0A1W2PQ63;E9PFQ4;E9PGF6;Q86SQ0-2;Q86SQ0-3;Q86SQ0	PHLB2_HUMAN	PHLDB2	Pleckstrin homology-like domain family B member 2	22.3947	22.3709	22.2218	22.2168	21.9888	22.2047
	0.154279	0.232653	Q86SQ9;Q86SQ9-2;Q86SQ9-3	Q5T0A6;A0A8V8TQS0;A0A8V8TR89;A0A8V8TQ81;Q86SQ9-2;Q86SQ9-3;Q86SQ9-4;Q86SQ9	DHDDS_HUMAN	DHDDS	Dehydrodolichyl diphosphate synthase complex subunit DHDDS	22.265	21.9699	21.0699	22.4035	21.1339	21.0694
	1.31203	-0.360392	Q86SX3;Q86SX3-2;Q86SX3-6	C9IYA4;C9J6B2;C9J317;C9K0G6;Q86SX3-2;Q86SX3-3;Q86SX3-5;Q86SX3-6;Q86SX3	TEDC1_HUMAN	TEDC1	Tubulin epsilon and delta complex protein 1	20.6388	20.5304	20.5825	20.894	20.7577	21.1811
	0.169027	0.0525551	Q86T03;Q86T03-2	G3V5T5;Q86T03-2;Q86T03	PP4P1_HUMAN	PIP4P1	Type 1 phosphatidylinositol 4,5-bisphosphate 4-phosphatase	22.2832	22.4634	22.2377	22.2157	22.4618	22.1492
	0.040285	0.0173486	Q86TB9;Q86TB9-4	Q86TB9-2;Q86TB9-4;Q86TB9	PATL1_HUMAN	PATL1	Protein PAT1 homolog 1	22.5114	22.6123	22.2526	22.6041	22.4604	22.2597
	1.12662	0.314819	Q86TC9	Q86TC9-2;A0A8I5QL13;A0A8J9ASZ5;A0A804CFL5;A0A8I5KWT3;A0A087WX60;Q86TC9	MYPN_HUMAN	MYPN	Myopalladin	23.2413	22.8692	22.8298	22.647	22.6756	22.6732
	0.0108743	0.00605138	Q86TG7-2	Q86TG7-2;Q86TG7-3;Q86TG7-5;A0A087WZG9	PEG10_HUMAN	PEG10	Isoform of Q86TG7, Isoform 2 of Retrotransposon-derived protein PEG10	19.3039	19.6094	19.4087	19.7166	19.4249	19.1623
	0.323413	-0.0316238	Q86TG7-4	Q86TG7-4;A0A087WUL4;A0A087WX23;A0A087WXK2;Q86TG7	PEG10_HUMAN	PEG10	Isoform of Q86TG7, Isoform 4 of Retrotransposon-derived protein PEG10	25.8903	25.8637	25.9589	25.8909	25.9885	25.9284
	0.699426	0.217284	Q86TU7	Q86TU7	SETD3_HUMAN	SETD3	Actin-histidine N-methyltransferase	21.782	21.4973	21.5311	21.2613	21.2927	21.6045
	1.09585	0.427291	Q86TW2;Q86TW2-2	F8W9Q8;G3V426;G3V3J2;Q86TW2-2;Q86TW2-3;Q86TW2	ADCK1_HUMAN	ADCK1	AarF domain-containing protein kinase 1	20.7056	20.2681	20.3013	20.1419	20.0866	19.7647
	0.0676742	0.0567811	Q86U06-2	Q86U06-2;Q86U06-3;Q86U06-5;Q86U06	RBM23_HUMAN	RBM23	Isoform of Q86U06, Isoform 2 of Probable RNA-binding protein 23	23.5582	23.1918	22.8387	23.5245	23.076	22.8179
	0.0595946	-0.0489915	Q86U38	H0YJP7;Q86U38-2;A0A3B3ISH6;Q86U38	NOP9_HUMAN	NOP9	Nucleolar protein 9	24.3484	23.8632	23.4802	24.2136	23.8332	23.7919
	0.598012	0.447077	Q86U42;Q86U42-2	H0YJH9;Q92843-2;G3V4T2;Q86U42-2;B4DEH8;A0A7I2V383;Q86U42	PABP2_HUMAN	PABPN1	Polyadenylate-binding protein 2	21.2904	21.0126	20.8598	20.3759	21.2208	20.2249
	1.21043	-0.087841	Q86U86;Q86U86-2;Q86U86-3;Q86U86-4;Q86U86-5;Q86U86-7;Q86U86-8;Q86U86-9	Q86U86-2;Q86U86-3;Q86U86-4;Q86U86-5;Q86U86-7;Q86U86-8;Q86U86-9;Q86U86	PB1_HUMAN	PBRM1	Protein polybromo-1	20.0851	20.1158	20.0512	20.1248	20.1673	20.2234
	1.00506	0.235762	Q86UE4	H0YB56;H0YBE0;E5RJU9;Q86UE4	LYRIC_HUMAN	MTDH	Protein LYRIC	26.7864	26.5331	26.4212	26.3684	26.3626	26.3026
	1.77477	-0.937628	Q86UE8;Q86UE8-2;Q86UE8-3	J3KRK0;Q9UKI8-2;Q9UKI8-3;Q9UKI8-4;Q9UKI8-5;A0A804HIB4;Q86UE8-2;Q86UE8-3;A0A804HK10;A0A804HJX3;A0A804HJZ9;A0A804HKF1;J3QLK5;Q9UKI8;Q86UE8	TLK2_HUMAN	TLK2	Serine/threonine-protein kinase tousled-like 2	20.7693	21.4416	21.4129	22.1932	21.9711	22.2725
	0.291056	0.0623391	Q86UK7;Q86UK7-2;Q86UK7-3	Q86UK7-2;Q86UK7-3;H3BPG6;Q86UK7	ZN598_HUMAN	ZNF598	E3 ubiquitin-protein ligase ZNF598	23.4773	23.357	23.1984	23.3091	23.2192	23.3173
	1.11637	0.063441	Q86UP2;Q86UP2-4	Q86UP2-2;Q86UP2-3;Q86UP2-4;G3V4Y7;Q86UP2	KTN1_HUMAN	KTN1	Kinectin	22.422	22.3911	22.3564	22.3317	22.2914	22.3561
	0.414184	0.140378	Q86UP3;Q86UP3-2;Q86UP3-4;Q86UP3-5	Q86UP3-2;Q86UP3-4;Q86UP3-5;E7EVZ1;Q86UP3	ZFHX4_HUMAN	ZFHX4	Zinc finger homeobox protein 4	26.792	26.6288	26.8973	26.4233	26.6307	26.843
	0.192309	0.0867748	Q86US8	Q86US8-2;Q86US8-3;I3L390;Q86US8	EST1A_HUMAN	SMG6	Telomerase-binding protein EST1A	22.7022	22.5135	22.252	22.6122	22.2226	22.3726
	0.111429	0.0328979	Q86UT8	Q86UT8	CATAC_HUMAN	CENATAC	Centrosomal AT-AC splicing factor	20.7201	21.058	20.9615	20.8196	20.8752	20.9461
	0.039709	-0.0461375	Q86UU0;Q86UU0-2;Q86UU0-3;Q86UU0-4	Q86UU0-2;Q86UU0-3;Q86UU0-4;A0A087WZX0;Q86UU0	BCL9L_HUMAN	BCL9L	B-cell CLL/lymphoma 9-like protein	20.7818	20.4921	20.0608	21.018	19.8699	20.5852
	0.122712	0.165118	Q86UU1;Q86UU1-2	Q86UU1-2;A0A087WZL0;Q86UU1	PHLB1_HUMAN	PHLDB1	Pleckstrin homology-like domain family B member 1	19.4657	19.1107	19.0828	19.116	18.2013	19.8465
	0.156992	0.069603	Q86UY6	Q86UY6-3;Q86UY6-4;F5H2C9;Q86UY6	NAA40_HUMAN	NAA40	N-alpha-acetyltransferase 40	22.7627	22.5192	22.9354	22.444	22.7529	22.8116
	0.245974	0.0667273	Q86V48	Q86V48-2;Q86V48-3;Q86V48	LUZP1_HUMAN	LUZP1	Leucine zipper protein 1	23.0972	23.4052	23.2182	23.2776	23.1694	23.0734
	0.156783	0.1531	Q86V81	E9PB61;Q86V81	THOC4_HUMAN	ALYREF	THO complex subunit 4	31.963	31.1696	30.9056	31.5488	30.9572	31.0729
	0.210966	0.0902119	Q86V97	Q86V97;Q8WVZ9	KBTB6_HUMAN	KBTBD6	Kelch repeat and BTB domain-containing protein 6	22.0761	22.1764	22.1768	22.1034	22.3054	21.7498
	0.719235	-0.201586	Q86VI3	F2Z2E2;Q86VI3	IQGA3_HUMAN	IQGAP3	Ras GTPase-activating-like protein IQGAP3	23.276	23.115	23.0291	23.5257	23.3399	23.1593
	0.269344	0.0486883	Q86VM9	E7ERS3;H3BRH3;Q86VM9	ZCH18_HUMAN	ZC3H18	Zinc finger CCCH domain-containing protein 18	25.3444	25.2708	25.2147	25.1219	25.2257	25.3361
	0.320045	0.179342	Q86VP6	Q86VP6-2;A0A0C4DGH5;Q86VP6	CAND1_HUMAN	CAND1	Cullin-associated NEDD8-dissociated protein 1	22.5421	22.478	22.1384	21.8481	22.265	22.5075
	0.0238597	0.0118809	Q86VQ1	H7C2L5;H7C0B2;Q86VQ1	GLCI1_HUMAN	GLCCI1	Glucocorticoid-induced transcript 1 protein	20.4097	19.8695	20.2029	20.1801	20.2235	20.0428
	0.146	-0.0964368	Q86VV8	J3KT00;A0A1W2PPP3;Q86VV8-3;Q86VV8-4;A0A7I2V670;Q86VV8	RTTN_HUMAN	RTTN	Rotatin	28.2804	27.9847	27.5124	27.9695	27.8794	28.218
	0.988631	-0.378457	Q86W50	Q86W50	MET16_HUMAN	METTL16	RNA N6-adenosine-methyltransferase METTL16	22.2425	22.7907	22.3033	22.8912	22.736	22.8448
	0.942363	0.15741	Q86W92-2	Q86W92-2;Q86W92-3;Q86W92-4;Q8ND30-2;Q8ND30-3;A0A804HJY3;A0A804HKA2;E9PP16;F5GZP6;Q86W92;Q8ND30	LIPB1_HUMAN	PPFIBP1	Isoform of Q86W92, Isoform 2 of Liprin-beta-1	23.6854	23.9025	23.9241	23.6835	23.7076	23.6487
	0.336716	0.513131	Q86W92-3	Q86W92-3;Q86W92-4;F5GZP6;Q86W92	LIPB1_HUMAN	PPFIBP1	Isoform of Q86W92, Isoform 3 of Liprin-beta-1	21.8889	21.3068	20.9122	21.9299	20.605	20.0336
	0.701628	-0.201567	Q86WJ1;Q86WJ1-2;Q86WJ1-3;Q86WJ1-4;Q86WJ1-5	Q86WJ1-2;Q86WJ1-3;Q86WJ1-4;Q86WJ1-5;A0A0A0MSH9;A0A0A0MRH8;A0A494C179;A0A494C1F7;Q86WJ1	CHD1L_HUMAN	CHD1L	Chromodomain-helicase-DNA-binding protein 1-like	21.1368	21.2258	21.2012	21.2247	21.3016	21.6423
	0.191847	0.111324	Q86WX3	Q86WX3	AROS_HUMAN	RPS19BP1	Active regulator of SIRT1	24.018	23.7861	23.3691	23.7422	23.382	23.715
	0.0304084	-0.137781	Q86X10;Q86X10-2;Q86X10-3;Q86X10-4	Q86X10-2;Q86X10-3;Q86X10-4;A2A2F0;Q86X10	RLGPB_HUMAN	RALGAPB	Ral GTPase-activating protein subunit beta	18.0487	17.3818	19.7767	15.8618	19.6076	20.1511
	0.24448	-0.141942	Q86X53	H0YBT6;H0YB25;E5RHA3;Q86X53	ERIC1_HUMAN	ERICH1	Glutamate-rich protein 1	24.5947	25.3102	25.2488	25.2109	25.1651	25.2034
	1.82035	0.392989	Q86X95	Q86X95	CIR1_HUMAN	CIR1	Corepressor interacting with RBPJ 1	23.4244	23.4587	23.3059	23.1575	22.9865	22.8661
	1.10994	0.172119	Q86XI2	H0Y6U5;Q86XI2-2;Q86XI2	CNDG2_HUMAN	NCAPG2	Condensin-2 complex subunit G2	22.4928	22.4882	22.2809	22.2475	22.213	22.285
	0.502641	-0.140329	Q86XK2;Q86XK2-5;Q86XK2-6	C9IYF0;Q86XK2-3;Q86XK2-4;Q86XK2-5;Q86XK2-6;A0A804HK63;Q86XK2	FBX11_HUMAN	FBXO11	F-box only protein 11	21.7554	21.6598	21.6334	22.0349	21.634	21.8006
	0.0274219	-0.00844955	Q86XP3	Q86XP3-2;Q86XP3	DDX42_HUMAN	DDX42	ATP-dependent RNA helicase DDX42	24.6996	24.791	24.4564	24.6886	24.6038	24.6799
	0.266041	0.293264	Q86XR8	Q86XR8-2;Q86XR8-3;Q86XR8-4;Q86XR8-5;F5GYW0;F5H0C6;F5H1B0;Q86XR8	CEP57_HUMAN	CEP57	Centrosomal protein of 57 kDa	21.5406	21.5199	21.1098	20.4032	21.0409	21.8463
	1.275	0.167002	Q86XZ4	Q86XZ4	SPAS2_HUMAN	SPATS2	Spermatogenesis-associated serine-rich protein 2	26.471	26.4846	26.2974	26.249	26.2308	26.2721
	0.40372	0.126869	Q86Y07	E7ERS5;Q86Y07-2;Q86Y07-5;E9PBU1;Q86Y07	VRK2_HUMAN	VRK2	Serine/threonine-protein kinase VRK2	22.6212	22.3571	22.2138	22.3712	22.274	22.1663
	0.0875929	0.0916341	Q86Y56	Q86Y56-2;H0Y650;Q86Y56	DAAF5_HUMAN	DNAAF5	Dynein axonemal assembly factor 5	25.0676	24.474	24.124	24.9424	24.3451	24.1032
	0.516355	-0.427955	Q86Y79	C9J7Z1;A0A096LPA3;A0A096LP22;Q86Y79	PTH_HUMAN	PTRH1	Peptidyl-tRNA hydrolase	20.9378	20.3188	21.2849	20.8466	21.6293	21.3495
	3.26889	0.630838	Q86YN6;Q86YN6-2;Q86YN6-5;Q86YN6-6	Q86YN6-3;Q86YN6-4;Q86YN6-5;Q86YN6-6;Q86YN6-2;A0A2R8YF93;A0A1B0GTS3;Q86YN6;A0A1B0GUT2	PRGC2_HUMAN	PPARGC1B	Peroxisome proliferator-activated receptor gamma coactivator 1-beta	26.2725	26.2849	26.3389	25.6016	25.6167	25.7855
	0.263132	0.0820897	Q86YP4;Q86YP4-2;Q86YP4-3	C9JVY3;C9JMI3;C9JGN4;C9JJK9;V9GY85;V9GYX5;H7C3H1;Q86YP4-3;Q86YP4-2;Q86YP4	P66A_HUMAN	GATAD2A	Transcriptional repressor p66-alpha	20.7022	20.7615	20.4106	20.4782	20.4852	20.6647
	0.307283	-0.406473	Q86YV9	Q86YV9	HPS6_HUMAN	HPS6	BLOC-2 complex member HPS6	19.6085	19.6697	19.4431	20.274	20.7242	18.9425
	0.045583	0.0421747	Q86YZ3	Q86YZ3	HORN_HUMAN	HRNR	Hornerin	23.9746	23.8592	23.1794	23.7419	23.8977	23.2469
	0.137325	0.0474542	Q8IUD2;Q8IUD2-2;Q8IUD2-3	G8JLD3;A0A8J9C065;X6RM00;X6RLX0;K7EKH8;K7EPP6;Q8IUD2-2;Q8IUD2-3;Q8IUD2-4;Q8IUD2	RB6I2_HUMAN	ERC1	ELKS/Rab6-interacting/CAST family member 1	22.8772	22.8261	22.5594	22.5639	22.7114	22.8449
	0.670196	-0.206392	Q8IUE6	Q8IUE6	H2A2B_HUMAN	H2AC21	Histone H2A type 2-B	29.0524	29.2985	29.1933	29.6271	29.2874	29.2488
	0.461073	-0.229516	Q8IUF8;Q8IUF8-4	Q8IUF8-3;Q8IUF8-4;Q8IUF8	RIOX2_HUMAN	RIOX2	Ribosomal oxygenase 2	21.5908	21.8841	21.6216	22.2186	21.5607	22.0057
	0.450267	-0.239644	Q8IUR0	Q8IUR0	TPPC5_HUMAN	TRAPPC5	Trafficking protein particle complex subunit 5	21.1207	20.5503	20.9223	21.1104	20.8296	21.3721
	0.240344	0.104369	Q8IUR7;Q8IUR7-7	C9J2I1;B7Z637;Q8IUR7-2;Q8IUR7-3;Q8IUR7-6;Q8IUR7-7;G5E9V6;G5E9V7;Q8IUR7	ARMC8_HUMAN	ARMC8	Armadillo repeat-containing protein 8	20.3196	20.1386	20.2918	20.4623	19.931	20.0436
	0.739561	-0.0726566	Q8IV48	Q8IV48	ERI1_HUMAN	ERI1	3'-5' exoribonuclease 1	24.8349	24.8595	24.9192	24.8761	25.0054	24.9501
	0.36457	0.184771	Q8IVF2;Q8IVF2-3	Q8IVF2-3;Q8IVF2	AHNK2_HUMAN	AHNAK2	Protein AHNAK2	23.122	23.1186	22.5418	22.598	22.7305	22.8995
	0.659696	-0.313121	Q8IVF7	Q8IVF7-2;Q8IVF7-3;F8W1F5;Q8IVF7	FMNL3_HUMAN	FMNL3	Formin-like protein 3	19.7755	20.2002	19.9882	19.9645	20.377	20.5619
	0.348291	0.248702	Q8IVL1;Q8IVL1-10;Q8IVL1-11;Q8IVL1-12;Q8IVL1-13;Q8IVL1-2;Q8IVL1-3;Q8IVL1-4;Q8IVL1-8;Q8IVL1-9	Q8IVL1-10;Q8IVL1-11;Q8IVL1-12;Q8IVL1-13;E9PNV5;Q8IVL1-2;Q8IVL1-3;Q8IVL1-4;Q8IVL1-5;Q8IVL1-8;Q8IVL1-9;Q8IVL1	NAV2_HUMAN	NAV2	Neuron navigator 2	22.326	21.9199	21.7063	21.4189	21.5951	22.1921
	0.159194	-0.159517	Q8IVS2	Q8IVS2	FABD_HUMAN	MCAT	Malonyl-CoA-acyl carrier protein transacylase, mitochondrial	19.7903	19.9684	19.9671	19.3743	20.1863	20.6438
	2.34863	0.300479	Q8IVT2	Q8IVT2	MISP_HUMAN	MISP	Mitotic interactor and substrate of PLK1	23.5635	23.7077	23.6249	23.3912	23.317	23.2865
	0.995201	0.100313	Q8IWA0	F8WE20;F8WC81;Q8IWA0	WDR75_HUMAN	WDR75	WD repeat-containing protein 75	24.0259	24.0979	24.1344	23.9316	23.9746	24.051
	0.00922006	-0.00229708	Q8IWC1	Q8IWC1-3;Q8IWC1-4;Q8IWC1	MA7D3_HUMAN	MAP7D3	MAP7 domain-containing protein 3	24.6999	24.6574	24.6638	24.8308	24.5578	24.6393
	0.931042	0.344257	Q8IWR0	Q8IWR0-2;Q8IWR0	Z3H7A_HUMAN	ZC3H7A	Zinc finger CCCH domain-containing protein 7A	20.8153	20.8556	20.764	20.804	20.249	20.3492
	0.934925	0.156862	Q8IWS0	Q8IWS0-3;Q8IWS0-5;Q5JRC6;A0A0D9SGE8;Q8IWS0	PHF6_HUMAN	PHF6	PHD finger protein 6	26.1027	26.1311	26.0372	25.7868	26.003	26.0106
	0.137484	0.0292009	Q8IWX8	J3QK89;Q8IWX8	CHERP_HUMAN	CHERP	Calcium homeostasis endoplasmic reticulum protein	26.7755	26.5454	26.615	26.5889	26.5665	26.6929
	1.87054	0.203746	Q8IWZ3-6	H0Y7Y3;H0Y785;H0Y4P6;H0Y472;A0A0A0MQZ8;Q8IWZ3-4;Q8IWZ3-6;Q8IWZ3	ANKH1_HUMAN	ANKHD1	Isoform of Q8IWZ3, Isoform 6 of Ankyrin repeat and KH domain-containing protein 1	23.8287	23.7508	23.6708	23.5161	23.5531	23.5699
	2.83562	0.329521	Q8IWZ8	B4DVK3;Q8IWZ8-2;K7ELR6;K7ESM0;Q8IWZ8	SUGP1_HUMAN	SUGP1	SURP and G-patch domain-containing protein 1	25.076	25.1226	25.0149	24.6928	24.7406	24.7916
	0.223037	0.101838	Q8IX01;Q8IX01-3;Q8IX01-4	Q8IX01-3;Q8IX01-4;M0R3F6;M0R2Z9;Q8IX01	SUGP2_HUMAN	SUGP2	SURP and G-patch domain-containing protein 2	20.9328	20.4965	20.8785	20.8935	20.5336	20.5751
	0.225492	-0.0344842	Q8IX12;Q8IX12-2	H0YFJ7;F5H2E6;A0A0C4DGG8;F5H1H2;Q8IX12-2;Q8IX12	CCAR1_HUMAN	CCAR1	Cell division cycle and apoptosis regulator protein 1	26.338	26.2078	26.1524	26.3029	26.2757	26.223
	0.207897	-0.0975189	Q8IXH6	Q8IXH6	T53I2_HUMAN	TP53INP2	Tumor protein p53-inducible nuclear protein 2	23.2462	23.1826	23.5246	23.6866	23.1769	23.3824
	0.979283	-0.393131	Q8IXH7;Q8IXH7-4	X6RLT1;Q8IXH7-4;H0UI80;Q8IXH7	NELFD_HUMAN	NELFCD	Negative elongation factor C/D	21.3201	21.207	21.583	21.6837	22.0564	21.5495
	0.76544	0.247772	Q8IXK0;Q8IXK0-2;Q8IXK0-4;Q8IXK0-5	Q8IXK0-2;Q8IXK0-4;Q8IXK0-5;A0A0A0MSI2;A0A994J5J9;Q8IXK0	PHC2_HUMAN	PHC2	Polyhomeotic-like protein 2	19.8597	19.426	19.8343	19.36	19.5095	19.5073
	1.50618	0.654865	Q8IXM3	Q8IXM3	RM41_HUMAN	MRPL41	Large ribosomal subunit protein mL41	23.8193	24.407	23.8586	23.5068	23.3086	23.3049
	0.269082	-0.226102	Q8IXQ4;Q8IXQ4-2	A0A0A0MRI1;Q8IXQ4-2;Q8IXQ4	GPAM1_HUMAN	GPALPP1	GPALPP motifs-containing protein 1	21.3432	20.6193	20.7153	21.3995	20.6241	21.3326
	0.345028	0.202403	Q8IXT5	B9ZVT1;Q8IXT5	RB12B_HUMAN	RBM12B	RNA-binding protein 12B	23.3861	23.2244	22.9884	23.3634	23.0057	22.6226
	0.667102	0.139011	Q8IXW5	Q8IXW5-2;Q8IXW5	RPAP2_HUMAN	RPAP2	Putative RNA polymerase II subunit B1 CTD phosphatase RPAP2	21.7388	21.8409	21.8813	21.5163	21.7328	21.7949
	1.21122	0.335332	Q8IXX5	Q8IXX5-2;Q8IXX5	T183A_HUMAN	TMEM183A	Transmembrane protein 183A	22.0721	22.1447	21.7255	21.6488	21.6196	21.6679
	0.581591	0.187394	Q8IXZ2	A0A0J9YYE2;Q8IXZ2	ZC3H3_HUMAN	ZC3H3	Zinc finger CCCH domain-containing protein 3	19.5672	19.33	19.0921	19.1763	19.0575	19.1934
	1.8829	-0.379739	Q8IY17;Q8IY17-2;Q8IY17-3	M0R2H4;M0R2K2;A0A384DVU0;M0QZK5;M0QYF5;Q8IY17-2;Q8IY17-3;Q8IY17-5;Q8IY17	PLPL6_HUMAN	PNPLA6	Patatin-like phospholipase domain-containing protein 6	21.6386	21.7927	21.8961	22.1245	22.0913	22.2509
	1.54987	-0.612308	Q8IY18	Q8IY18	SMC5_HUMAN	SMC5	Structural maintenance of chromosomes protein 5	20.1928	20.7096	20.5409	21.2782	21.0665	20.9354
	0.0983929	-0.0166709	Q8IY21	A0A7P0T8Y0;A0A7P0TAZ7;Q8IY21	DDX60_HUMAN	DDX60	Probable ATP-dependent RNA helicase DDX60	23.9428	23.8568	23.8113	23.9724	23.8107	23.8779
	0.0584978	-0.0116094	Q8IY37	F5H3Y4;Q8IY37	DHX37_HUMAN	DHX37	Probable ATP-dependent RNA helicase DHX37	24.7752	24.589	24.7891	24.6828	24.7455	24.7598
	0.246323	0.376633	Q8IY57;Q8IY57-5	Q8IY57-3;Q8IY57-5;Q8IY57	YAF2_HUMAN	YAF2	YY1-associated factor 2	19.2751	19.6357	18.8917	19.933	17.9905	18.749
	1.37444	0.211	Q8IY67-2	Q8IY67-2;A0A087WZ13;Q8IY67	RAVR1_HUMAN	RAVER1	Isoform of Q8IY67, Isoform 2 of Ribonucleoprotein PTB-binding 1	21.385	21.6084	21.414	21.2627	21.2811	21.2306
	1.34414	0.106638	Q8IY81	Q8IY81	SPB1_HUMAN	FTSJ3	pre-rRNA 2'-O-ribose RNA methyltransferase FTSJ3	26.6662	26.73	26.6371	26.549	26.5433	26.621
	0.416148	-0.0461769	Q8IYA6	Q8IYA6-2;Q8IYA6-3;Q8IYA6	CKP2L_HUMAN	CKAP2L	Cytoskeleton-associated protein 2-like	23.0252	23.1021	23.1204	23.0564	23.1796	23.1503
	0.203023	-0.0514463	Q8IYB3-2	Q8IYB3-2;A0A0S2Z4Z6;M0R088;A9Z1X7;A0A994J7V4;A0A994J7H1;A0A994J4Y3;Q8IYB3	SRRM1_HUMAN	SRRM1	Isoform of Q8IYB3, Isoform 2 of Serine/arginine repetitive matrix protein 1	27.4888	27.3217	27.6517	27.4952	27.5642	27.5572
	0.161243	0.123864	Q8IYB8	Q8IYB8	SUV3_HUMAN	SUPV3L1	ATP-dependent RNA helicase SUPV3L1, mitochondrial	20.3015	20.9419	20.5952	20.4876	20.8732	20.1063
	0.387493	-0.333438	Q8IYD1	Q8IYD1	ERF3B_HUMAN	GSPT2	Eukaryotic peptide chain release factor GTP-binding subunit ERF3B	21.825	21.3336	21.0022	22.2547	21.5467	21.3598
	0.985073	0.491245	Q8IYP9	E9PAP7;A0A1W2PRJ8;B3KXV3;Q8IYP9	ZDH23_HUMAN	ZDHHC23	Palmitoyltransferase ZDHHC23	23.1724	23.3304	22.8541	22.2822	22.9252	22.6757
	0.259948	0.174215	Q8IYU8	Q8IYU8	MICU2_HUMAN	MICU2	Calcium uptake protein 2, mitochondrial	22.0398	21.6696	21.6074	21.9842	21.6225	21.1875
	0.348548	-0.516011	Q8IYW5	Q8IYW5	RN168_HUMAN	RNF168	E3 ubiquitin-protein ligase RNF168	18.0717	18.403	17.0907	17.8313	17.972	19.3102
	0.884753	-0.199916	Q8IZ69	H7C100;Q8IZ69-2;F2Z2W7;Q8IZ69	TRM2A_HUMAN	TRMT2A	tRNA (uracil-5-)-methyltransferase homolog A	22.9421	23.2695	23.2057	23.342	23.3933	23.2817
	0.358469	-0.0809542	Q8IZH2;Q8IZH2-2	H7C5E4;Q8IZH2-2;Q8IZH2	XRN1_HUMAN	XRN1	5'-3' exoribonuclease 1	22.594	22.5363	22.4896	22.7226	22.6969	22.4433
	0.316223	-0.111116	Q8IZL8	E7EV54;C9JFV4;I3L4P1;I3L445;Q8IZL8	PELP1_HUMAN	PELP1	Proline-, glutamic acid- and leucine-rich protein 1	24.7516	24.8022	25.003	24.7206	25.0727	25.0969
	0.0427879	-0.0205663	Q8IZP0;Q8IZP0-10;Q8IZP0-2;Q8IZP0-3;Q8IZP0-4;Q8IZP0-5;Q8IZP0-6;Q8IZP0-7;Q8IZP0-8;Q8IZP0-9	B6VEX4;A0A0A0MRT6;Q8IZP0-10;Q8IZP0-11;Q8IZP0-2;Q8IZP0-3;Q8IZP0-4;Q8IZP0-5;Q8IZP0-6;Q8IZP0-7;Q8IZP0-8;Q8IZP0-9;Q8IZP0	ABI1_HUMAN	ABI1	Abl interactor 1	21.4544	21.8216	21.2888	21.6329	21.5015	21.4921
	0.4392	0.0650272	Q8IZT6	A0A7P0Z4R7;A0A7P0Z491;Q8IZT6	ASPM_HUMAN	ASPM	Abnormal spindle-like microcephaly-associated protein	22.5283	22.3783	22.4448	22.3013	22.3937	22.4613
	0.642419	-0.184254	Q8N0T1	Q8N0T1	RBIS_HUMAN	RBIS	Ribosomal biogenesis factor	22.0375	22.0522	22.0663	21.9906	22.2896	22.4286
	0.436048	0.520652	Q8N0U8	Q8N0U8-2;A0A3B3ISV4;Q8N0U8	VKORL_HUMAN	VKORC1L1	Vitamin K epoxide reductase complex subunit 1-like protein 1	21.9196	21.6188	20.4165	20.9612	20.3517	21.0801
	0.331774	-0.272844	Q8N0V3	Q8N0V3-2;Q8N0V3	RBFA_HUMAN	RBFA	Putative ribosome-binding factor A, mitochondrial	20.9845	20.8302	19.931	20.9097	20.9631	20.6915
	0.115609	-0.0540009	Q8N0X7	Q8N0X7	SPART_HUMAN	SPART	Spartin	21.3385	21.1194	20.8359	21.0124	21.3129	21.1305
	0.426283	-0.299096	Q8N0Y2;Q8N0Y2-2	Q8N0Y2-2;Q8N0Y2	ZN444_HUMAN	ZNF444	Zinc finger protein 444	21.6038	21.4479	21.0909	21.9548	21.9215	21.1636
	0.574154	0.109104	Q8N0Z3	Q8N0Z3	SPICE_HUMAN	SPICE1	Spindle and centriole-associated protein 1	22.4041	22.4325	22.4269	22.1991	22.2606	22.4766
	0.0922954	-0.0913531	Q8N0Z6	Q8N0Z6	TTC5_HUMAN	TTC5	Tetratricopeptide repeat protein 5	18.5904	19.0736	19.2384	18.7621	18.7664	19.648
	0.985885	0.343426	Q8N108;Q8N108-12;Q8N108-13;Q8N108-14;Q8N108-15;Q8N108-16;Q8N108-17;Q8N108-18;Q8N108-19	Q8N108-16;Q8N108-17;Q8N108-18;Q8N108-19;Q8N108-12;Q8N108-13;Q8N108-14;Q8N108-15;Q8N108	MIER1_HUMAN	MIER1	Mesoderm induction early response protein 1	21.7198	22.2182	21.7379	21.5549	21.5365	21.5542
	0.962042	-0.273036	Q8N122	Q8N122-3;A0A8V8TMD9;Q8N122	RPTOR_HUMAN	RPTOR	Regulatory-associated protein of mTOR	21.0288	20.9635	20.6091	21.1906	21.1064	21.1235
	0.129053	0.154517	Q8N183	Q8N183	NDUF2_HUMAN	NDUFAF2	NADH dehydrogenase [ubiquinone] 1 alpha subcomplex assembly factor 2	20.3659	20.9829	20.0862	20.9228	20.3407	19.7079
	0.488398	0.209069	Q8N1F7	H3BVE2;H3BVG0;Q8N1F7-2;Q8N1F7	NUP93_HUMAN	NUP93	Nuclear pore complex protein Nup93	22.5092	22.2469	22.1432	22.3632	22.0684	21.8406
	0.262244	0.248841	Q8N1G2	Q8N1G2	CMTR1_HUMAN	CMTR1	Cap-specific mRNA (nucleoside-2'-O-)-methyltransferase 1	20.9781	20.8522	19.9666	20.0911	20.7542	20.2051
	0.756293	-0.242988	Q8N1G4	Q8N1G4	LRC47_HUMAN	LRRC47	Leucine-rich repeat-containing protein 47	23.4771	23.5725	23.2114	23.6806	23.8285	23.4809
	0.502881	0.554565	Q8N1N4	Q8N1N4-2;Q8N1N4	K2C78_HUMAN	KRT78	Keratin, type II cytoskeletal 78	22.5671	22.9121	21.6341	21.9685	22.2334	21.2477
	0.139026	-0.0510953	Q8N257	Q8N257;A0A2R8Y619	H2B3B_HUMAN	H2BC26	Histone H2B type 3-B	24.1805	24.5809	24.1918	24.3017	24.4113	24.3934
[truncated: 1,144 more rows]

## Sheet: acSRC_SRC
Significant	-LOG(P-value)	Difference	Protein.Group	Protein.Ids	Protein.Names	Genes	First.Protein.Description	PPD 3.1	PPD 3.2	PPD 3.3	PPD 4.1	PPD 4.2	PPD 4.3
+	3.56396	5.01186	Q5QP82	Q5QP82;A0A0A0MQT4;Q5QP82-2	DCA10_HUMAN	DCAF10	DDB1- and CUL4-associated factor 10	19.8738	19.9328	20.5895	14.4278	15.5165	15.4162
+	1.37302	1.51704	A0A0B4J2F2	P57059;A0A0B4J2F2;A0A2R8Y6E4	SIK1B_HUMAN	SIK1B	Putative serine/threonine-protein kinase SIK1B	17.4079	17.4454	17.8037	15.1046	16.1827	16.8186
+	2.33922	-0.825217	A0A0G2JQT1;A0A0G2JR96	A0A0G2JR96;A0A0G2JQT1	A0A0G2JQT1_HUMAN;A0A0G2JR96_HUMAN	CYFIP1	Isoform of Q7L576, Cytoplasmic FMR1-interacting protein 1 (Fragment)	17.8098	18.1227	17.7169	18.5981	18.8517	18.6751
+	1.62166	-1.60529	A0A3B3IRZ4	Q6DN90;Q5JU85;A0A2R8Y7T6;A0A2R8Y695;A0A6Q8PFR7;Q5JU85-3;A0A1W2PR18;A0A1W2PR28;Q6DN90-2;Q6DN90-3;A0A3B3IRZ4;A0A3B3IU98;A0A0C4DGT3	A0A3B3IRZ4_HUMAN	IQSEC1	Isoform of Q6DN90, IQ motif and SEC7 domain-containing protein 1	16.165	15.5196	16.753	17.9931	18.0666	17.1937
+	2.5524	-3.35047	A0A494BZX7;A0A499FIJ6;A0A8V8TPQ1;B0QY83	B0QY74;B0QY83;A0A494BZX7;A0A499FIJ6;W0Z7M9;A0A8V8TPQ1;A0A669KBG1	A0A494BZX7_HUMAN;A0A499FIJ6_HUMAN;A0A8V8TPQ1_HUMAN;B0QY83_HUMAN	MRTFA	Isoform of Q969V6, Myocardin-related transcription factor A	15.1764	15.3532	16.4006	19.6706	18.604	18.707
+	1.46522	-1.43735	A0A7I2V490;A0A7I2V5F1	A0A7I2V490;A0A7I2V5F1	A0A7I2V490_HUMAN;A0A7I2V5F1_HUMAN	DNMT1	Isoform of P26358, DNA (cytosine-5)-methyltransferase	14.8775	15.8619	15.0525	16.0814	17.2512	16.7714
+	1.91292	-0.76428	A3KN83;A3KN83-2	A3KN83;A3KN83-2;A3KN83-3	SBNO1_HUMAN	SBNO1	Protein strawberry notch homolog 1	19.4729	19.9633	19.9797	20.4964	20.6833	20.5291
+	4.29229	-5.21432	A8K2U0	A8K2U0	A2ML1_HUMAN	A2ML1	Alpha-2-macroglobulin-like protein 1	15.5316	15.1758	15.077	19.9874	20.7843	20.6557
+	2.48745	3.78934	D6RGE0	D6RGE0	D6RGE0_HUMAN	RPS3A	Isoform of P61247, 40S ribosomal protein S3a (Fragment)	19.787	17.903	18.1044	14.9566	14.7088	14.7609
+	1.61854	-1.34456	H0YBW1	Q6PKG0;H0YBW1;H0YAN4;A0A0B4J210;A0A8I5KSP1;A0A8I5KWU3;Q6PKG0-3;E5RH50;E5RHK4	H0YBW1_HUMAN	LARP1	Isoform of Q6PKG0, La-related protein 1 (Fragment)	19.2053	18.8049	20.0532	20.5116	20.8207	20.7648
+	3.31486	-1.07837	H7BY16	P19338;C9JLB1;H7BY16;A0A7I2V2S8;A0A7I2V2U7;A0A7I2V349;A0A7I2V3F3;A0A7I2V428;A0A7I2V506;A0A7I2V5M5;A0A7I2V699	H7BY16_HUMAN	NCL	Isoform of P19338, Nucleolin	29.1923	29.2722	29.4847	30.4025	30.2938	30.488
+	2.66416	-0.509766	H7C3M7	H7C3M7	H7C3M7_HUMAN	FARP2	Isoform of O94887, FERM, ARHGEF and pleckstrin domain-containing protein 2 (Fragment)	19.023	18.7882	18.9371	19.4118	19.4724	19.3935
+	2.37627	-0.565323	O00203	Q13367;O00203;A0A0S2Z4Z4;A0A2R8Y2A8;A0A590UKC4;A0A590UJU0;A0A590UJU7;A0A590UK04;A0A590UJE5;A0A590UJ60;O00203-3;A0A8Q3WKF8;A0A8Q3WKJ9;Q13367-3;Q13367-4;A0A8Q3WKI5;A0A8Q3WKK0;A0A8Q3WKN2;A0A8Q3SIM7;A0A8Q3WL34;A0A8Q3SIS1;A0A8Q3SHR2;A0A8Q3SHS3;A0A8Q3SHU2;A0A8Q3SHW6;A0A8Q3SHP3;A0A8Q3SI03;A0A5F9UJV3	AP3B1_HUMAN	AP3B1	AP-3 complex subunit beta-1	22.5007	22.7851	22.5141	23.2178	23.1377	23.1404
+	4.65949	-0.629346	O00303	O00303;H0YDT6	EIF3F_HUMAN	EIF3F	Eukaryotic translation initiation factor 3 subunit F	25.7347	25.7243	25.804	26.4025	26.3622	26.3864
+	1.55289	0.858205	O00339;O00339-2;O00339-3	O00339;H0YBU5;H0YBJ4;H0YBF2;O00339-2;O00339-3;O00339-4	MATN2_HUMAN	MATN2	Matrilin-2	17.8283	17.7667	18.0934	16.6946	16.9343	17.4849
+	3.91718	1.20881	O00468-6	O00468;O00468-3;O00468-4;O00468-5;O00468-6;O00468-7	AGRIN_HUMAN	AGRN	Isoform of O00468, Isoform 6 of Agrin	20.2042	20.0951	20.1312	18.8385	18.883	19.0826
+	3.44069	-1.44785	O00505	O00629;O00505;H7C4F6;A0A7I2V340	IMA4_HUMAN	KPNA3	Importin subunit alpha-4	19.7074	19.5069	19.744	21.0793	21.2945	20.9281
+	2.52772	-1.1862	O00629	O00629;H7C4F6;A0A7I2YQ95;A0A7I2V333;A0A7I2V340	IMA3_HUMAN	KPNA4	Importin subunit alpha-3	16.049	16.5437	16.6087	17.4933	17.6	17.6665
+	2.8247	-0.584851	O14579	O14579;O14579-2;M0QXB4	COPE_HUMAN	COPE	Coatomer subunit epsilon	21.5248	21.4368	21.3046	21.9583	22.0864	21.9761
+	2.19961	-0.486038	O14617-5	O14617;O14617-2;O14617-3;O14617-4;O14617-5;A0A8V8TQW4	AP3D1_HUMAN	AP3D1	Isoform of O14617, Isoform 5 of AP-3 complex subunit delta-1	22.6832	22.7641	22.4658	23.1647	23.0769	23.1296
+	4.82449	-1.49333	O14646;O14646-2	O14646;O14646-2	CHD1_HUMAN	CHD1	Chromodomain-helicase-DNA-binding protein 1	22.4263	22.504	22.5648	23.9515	24.0795	23.944
+	3.0304	-0.413095	O14647	O14647;A0A1B0GTU9;A0A0D9SEP7;A0A0D9SEU0;O14647-2;A0A8V8TRB2	CHD2_HUMAN	CHD2	Chromodomain-helicase-DNA-binding protein 2	19.896	19.9451	19.9616	20.432	20.3154	20.2945
+	3.68892	-1.37608	O14730	O14730;B4E1Q4;O14730-2	RIOK3_HUMAN	RIOK3	Serine/threonine-protein kinase RIO3	19.9997	20.3495	20.0972	21.5036	21.5053	21.5657
+	2.82762	0.608247	O15230	O15230	LAMA5_HUMAN	LAMA5	Laminin subunit alpha-5	19.7087	19.8499	19.6168	19.0692	19.195	19.0865
+	3.19837	-0.394991	O15234	O15234	CASC3_HUMAN	CASC3	Protein CASC3	21.9472	21.9419	21.8647	22.3193	22.2567	22.3628
+	2.95105	-3.38349	O15235	O15235	RT12_HUMAN	MRPS12	28S ribosomal protein S12, mitochondrial	17.173	15.8155	16.7265	19.8457	19.9494	20.0705
+	3.57605	-0.419367	O15371;O15371-3	O15371;B0QYA5;B0QYA6;B0QYA8;O15371-3	EIF3D_HUMAN	EIF3D	Eukaryotic translation initiation factor 3 subunit D	25.5151	25.4173	25.5172	25.9204	25.8841	25.9033
+	3.88845	-0.57467	O15372	O15372;B3KS98;E5RJT0	EIF3H_HUMAN	EIF3H	Eukaryotic translation initiation factor 3 subunit H	26.2288	26.2784	26.2766	26.8686	26.7641	26.8751
+	2.42463	-0.777561	O15417	O15417;O15417-2;H7C0N9;H9KVB4	TNC18_HUMAN	TNRC18	Trinucleotide repeat-containing gene 18 protein	18.2161	17.9419	18.3042	18.9032	19.0608	18.8309
+	1.40925	-1.55543	O15516	O15516	CLOCK_HUMAN	CLOCK	Circadian locomoter output cycles protein kaput	15.3443	14.4871	16.1738	16.7086	16.7426	17.2202
+	1.96632	-1.21513	O43169	O43169;A0A8I5QJ67;A0A8I5QKN7;H3BUX2;D6RFH4;A0A8I5KP74;A0A8I5KSY3;A0A8I5KSY8;A0A8I5KX20;A0A8I5KYK4;J3QR91	CYB5B_HUMAN	CYB5B	Cytochrome b5 type B	14.6461	15.1423	15.3613	16.0207	16.586	16.1884
+	1.95183	-0.642209	O43709	O43709;F8WD87;F8WD67;E9PCQ7;O43709-2;O43709-3	BUD23_HUMAN	BUD23	Probable 18S rRNA (guanine-N(7))-methyltransferase	20.7001	20.6512	21.0932	21.5252	21.417	21.429
+	3.97821	-1.84067	O43719	O43719	HTSF1_HUMAN	HTATSF1	HIV Tat-specific factor 1	20.4367	20.5304	20.5762	22.3753	22.1506	22.5394
+	1.78247	-0.712743	O60231	O60231;A0A140T947	DHX16_HUMAN	DHX16	Pre-mRNA-splicing factor ATP-dependent RNA helicase DHX16	19.8658	20.3657	20.4133	20.8538	20.9865	20.9428
+	3.87226	-5.07316	O60427	O60427;A0A0A0MR51;H7C2V0	FADS1_HUMAN	FADS1	Acyl-CoA (8-3)-desaturase	14.9597	14.0683	14.0636	19.1206	19.7673	19.4232
+	2.12385	-0.56089	O60508	O60508;Q5SRN1	PRP17_HUMAN	CDC40	Pre-mRNA-processing factor 17	18.9118	18.5339	18.6756	19.2749	19.3013	19.2277
+	2.21127	-0.58587	O60645	O60645;D6RB59;H0Y995	EXOC3_HUMAN	EXOC3	Exocyst complex component 3	19.09	19.2486	19.4269	19.8656	19.9181	19.7393
+	2.31934	-2.2091	O60783	O60783	RT14_HUMAN	MRPS14	28S ribosomal protein S14, mitochondrial	17.4501	17.6903	16.516	19.2717	19.2752	19.7369
+	3.11235	0.507015	O75323	O75323;H7C333	NIPS2_HUMAN	NIPSNAP2	Protein NipSnap homolog 2	19.672	19.7867	19.6694	19.124	19.2443	19.2387
+	1.5432	2.17974	O75410;O75410-2;O75410-9	O75410;O75410-10;E7EVI4;E7ET87;H0YBT8;H0YAY0;B4E3H6;O75410-2;O75410-3;O75410-4;O75410-5;O75410-6;O75410-7;O75410-9;R4GMT7;E5RFM9	TACC1_HUMAN	TACC1	Transforming acidic coiled-coil-containing protein 1	20.74	20.2276	19.2472	16.9326	18.2921	18.4509
+	3.22383	-0.540012	O75616	O75616;O75616-2;J3QRV9;J3QSB2	ERAL1_HUMAN	ERAL1	GTPase Era, mitochondrial	18.7841	18.662	18.6734	19.2917	19.2782	19.1696
+	2.79822	-0.45157	O75821	O75821;K7EL20;K7ENA8;K7EP16;K7ER90	EIF3G_HUMAN	EIF3G	Eukaryotic translation initiation factor 3 subunit G	25.9526	25.9712	26.1152	26.4691	26.4114	26.5133
+	1.77261	-0.656815	O94806	O94806;Q9BZL6;Q9BZL6-2;Q9BZL6-3	KPCD3_HUMAN	PRKD3	Serine/threonine-protein kinase D3	18.5612	19.1202	18.9137	19.4708	19.5832	19.5116
+	1.986	-1.13131	O94913	O94913;A0A8I5KX04	PCF11_HUMAN	PCF11	Pre-mRNA cleavage complex 2 protein Pcf11	16.3369	16.3227	16.4922	17.2652	17.2813	17.9991
+	3.33042	-0.35603	O95071;O95071-2	O95071;O95071-2;E7EMW7	UBR5_HUMAN	UBR5	E3 ubiquitin-protein ligase UBR5	19.7071	19.7906	19.7514	20.0663	20.1488	20.102
+	2.81643	-0.532571	O95295	O95295	SNAPN_HUMAN	SNAPIN	SNARE-associated protein Snapin	17.3741	17.4965	17.2642	17.8814	17.9386	17.9125
+	2.33921	-0.421799	O95470	O95470;A0A8V8TN35	SGPL1_HUMAN	SGPL1	Sphingosine-1-phosphate lyase 1	20.0897	20.0886	19.8728	20.4492	20.4106	20.4567
+	3.97296	-0.647663	O95714	O95714;A0A0J9YXQ8	HERC2_HUMAN	HERC2	E3 ubiquitin-protein ligase HERC2	21.6105	21.6537	21.5309	22.2014	22.2675	22.2693
+	1.865	2.15337	P00505	P00505;P00505-2	AATM_HUMAN	GOT2	Aspartate aminotransferase, mitochondrial	17.6055	18.3305	18.5696	15.9619	15.312	16.7717
+	2.41202	-2.71833	P02788;P02788-2	P02788;P02788-2;E7EQB2;E7ER44	TRFL_HUMAN	LTF	Lactotransferrin	15.684	16.6192	15.6433	18.3922	19.3434	18.3658
+	3.39908	2.13908	P05067;P05067-11;P05067-7;P05067-8;P05067-9	P05067;P05067-11;H7C0V9;E9PG40;P05067-7;P05067-8;P05067-9	A4_HUMAN	APP	Amyloid-beta precursor protein	17.2042	17.7317	17.7897	15.5448	15.3357	15.4278
+	1.28552	2.345	P05166;P05166-2	P05166;E7EX59;E7ETT1;E7ETT4;E7EUY3;F8WBI9;P05166-2;E9PDR0;E9PEC3	PCCB_HUMAN	PCCB	Propionyl-CoA carboxylase beta chain, mitochondrial	17.2419	18.4074	19.3686	16.4051	16.7553	14.8225
+	4.6811	-1.7647	P07199	P07199	CENPB_HUMAN	CENPB	Major centromere autoantigen B	21.2943	21.4627	21.2738	23.063	23.2033	23.0586
+	2.97902	-0.838206	P07910-2	P07910;B4DY08;G3V5V7;G3V555;G3V4W0;G3V575;G3V576;G3V4C1;G3V2Q1;G3V2D6;P07910-2;P07910-3;P07910-4	HNRPC_HUMAN	HNRNPC	Isoform of P07910, Isoform C1 of Heterogeneous nuclear ribonucleoproteins C1/C2	25.3008	25.5428	25.4929	26.3313	26.1544	26.3655
+	1.6718	0.954671	P08047	P08047;P08047-2;P08047-3	SP1_HUMAN	SP1	Transcription factor Sp1	16.5742	16.3901	16.7541	15.22	16.0417	15.5927
+	1.79989	-1.12333	P08183;P08183-2	P08183;P08183-2	MDR1_HUMAN	ABCB1	ATP-dependent translocase ABCB1	16.0312	16.7291	15.8678	17.1607	17.3667	17.4707
+	2.14573	-0.582708	P08651-2	P08651;P08651-2;P08651-3;P08651-4;P08651-5;P08651-6;A0A286YEX4	NFIC_HUMAN	NFIC	Isoform of P08651, Isoform 1 of Nuclear factor 1 C-type	21.3103	21.6764	21.5005	22.0652	22.0074	22.1627
+	2.05779	-0.499266	P09429	B2RPK0;P09429;Q5T7C4	HMGB1_HUMAN	HMGB1	High mobility group protein B1	23.61	23.9406	23.7985	24.264	24.2212	24.3617
+	2.45165	4.35012	P10124	P10124	SRGN_HUMAN	SRGN	Serglycin	20.4947	20.4783	20.7659	16.6841	17.1499	14.8545
+	3.71525	1.40805	P11498	P11498	PYC_HUMAN	PC	Pyruvate carboxylase, mitochondrial	22.9069	23.051	22.7655	21.4187	21.6354	21.4451
+	1.95932	-0.798574	P13984	P13984	T2FB_HUMAN	GTF2F2	General transcription factor IIF subunit 2	21.2996	21.9136	21.5981	22.4321	22.4061	22.3688
+	1.4863	-1.37424	P15104	P15104;A0A2R8YDT1	GLNA_HUMAN	GLUL	Glutamine synthetase	15.2059	15.1335	16.0679	17.2012	17.0934	16.2354
+	2.41579	0.499954	P16989	P16989;P16989-3	YBOX3_HUMAN	YBX3	Y-box-binding protein 3	25.6494	25.7263	25.8928	25.2938	25.1728	25.302
+	4.73526	-1.58033	P17480	P17480;P17480-2;E9PMM2;E9PKP7	UBF1_HUMAN	UBTF	Nucleolar transcription factor 1	25.5747	25.6564	25.6908	27.2055	27.326	27.1314
+	3.58179	-1.44243	P17480-2	P17480-2;E9PKP7	UBF1_HUMAN	UBTF	Isoform of P17480, Isoform UBF2 of Nucleolar transcription factor 1	22.4738	22.3249	22.2149	23.6796	23.9636	23.6977
+	1.33373	-2.46082	P17535	P17535	JUND_HUMAN	JUND	Transcription factor JunD	17.3504	14.5606	15.0453	18.065	18.2474	18.0264
+	2.49983	-0.5242	P18615	P18615;P18615-3;P18615-4	NELFE_HUMAN	NELFE	Negative elongation factor E	20.7251	20.8671	20.8065	21.2347	21.4656	21.271
+	3.72703	1.55273	P18827	P18827	SDC1_HUMAN	SDC1	Syndecan-1	24.962	24.9261	25.1265	23.3717	23.3344	23.6503
+	2.56057	-0.86963	P19338	P19338;C9JLB1;A0A7I2V2U7;A0A7I2V349;A0A7I2V3F3;A0A7I2V428;A0A7I2V506;A0A7I2V5M5	NUCL_HUMAN	NCL	Nucleolin	23.1371	23.2595	23.5366	24.1285	24.1154	24.2982
+	3.20971	-0.842563	P19784	P19784;H3BNI9	CSK22_HUMAN	CSNK2A2	Casein kinase II subunit alpha'	22.0228	22.2099	22.3061	22.9846	23.0179	23.064
+	2.91634	-0.446381	P21127	Q9UQ88;P21127;Q9UQ88-2;Q9UQ88-3;Q9UQ88-4;Q9UQ88-9;P21127-10;P21127-12;A0A0D9SEI3;A0A0D9SEN2;A0A0D9SER5;P21127-2;P21127-3;P21127-4;P21127-5;P21127-6;P21127-8;P21127-9;Q9UQ88-10;Q5QPR3;Q5QPR4	CD11B_HUMAN	CDK11B	Cyclin-dependent kinase 11B	22.1218	22.2039	22.2465	22.7179	22.5939	22.5995
+	2.60885	-0.507722	P24534	P24534;C9JZW3	EF1B_HUMAN	EEF1B2	Elongation factor 1-beta	23.9996	24.2307	24.0991	24.5538	24.6318	24.6669
+	3.63723	-0.816416	P25440;P25440-2	P25440;H0Y6K2;A0A140T9E9;A0A140T9I1;P25440-2;P25440-3;P25440-4;A0A0G2JK44;A0A0G2JHN8	BRD2_HUMAN	BRD2	Bromodomain-containing protein 2	20.9375	21.1105	20.9608	21.8162	21.759	21.8829
+	2.00341	-0.611733	P26640	P26640;A0A140T936;A0A140T954	SYVC_HUMAN	VARS1	Valine--tRNA ligase	22.0133	22.4034	22.3185	22.7852	22.975	22.8103
+	2.34445	-0.479933	P27695	P27695;G3V5Q1;G3V3M6;H7C4A8	APEX1_HUMAN	APEX1	DNA-(apurinic or apyrimidinic site) endonuclease	20.8051	21.0055	20.813	21.312	21.4571	21.2943
+	3.61608	-0.737549	P29083	P29083;E9PER7	T2EA_HUMAN	GTF2E1	General transcription factor IIE subunit 1	18.8949	18.772	18.7772	19.5961	19.596	19.4646
+	2.842	-0.720903	P29084	P29084	T2EB_HUMAN	GTF2E2	Transcription initiation factor IIE subunit beta	20.1846	20.4717	20.315	21.011	21.1243	20.9987
+	1.20981	-4.97952	P30533	P30533	AMRP_HUMAN	LRPAP1	Alpha-2-macroglobulin receptor-associated protein	14.6879	16.7439	21.2252	22.2926	22.7299	22.573
+	2.91445	-0.87365	P31276	P31276	HXC13_HUMAN	HOXC13	Homeobox protein Hox-C13	18.055	18.0158	18.2597	18.963	18.8647	19.1237
+	3.77927	0.570011	P31431	P31431;P31431-2	SDC4_HUMAN	SDC4	Syndecan-4	20.2481	20.1152	20.1644	19.6203	19.6222	19.5751
+	2.42754	-3.07487	P32121;P32121-2;P32121-3;P32121-4;P32121-5	P32121;P32121-2;P32121-3;P32121-4;P32121-5;K7ENA6;I3L412	ARRB2_HUMAN	ARRB2	Beta-arrestin-2	14.4501	15.1192	14.7981	16.9467	18.4917	18.1535
+	1.84528	-0.684777	P32242	P32242;P32243;G3V3P9;G3V3J3;A0A5F9ZHY1;P32243-2	OTX1_HUMAN	OTX1	Homeobox protein OTX1	17.829	17.6039	17.3227	18.4053	18.2626	18.1419
+	2.01487	-0.666009	P35269	P35269;M0R0R9;M0R0Z3	T2FA_HUMAN	GTF2F1	General transcription factor IIF subunit 1	20.7334	21.2075	21.0576	21.6215	21.7243	21.6508
+	3.57407	-0.693041	P35606;P35606-2	P35606;P35606-2;H0YAC7;H0Y938;A0A7I2YQF9;A0A7I2V258;A0A7I2V3G0	COPB2_HUMAN	COPB2	Coatomer subunit beta'	21.8461	21.8358	22.0011	22.5889	22.6219	22.5514
+	2.33938	-0.501544	P35659	P35659;P35659-2;H0Y993;B4DFG0;A0A494C028;A0A494C198	DEK_HUMAN	DEK	Protein DEK	23.0949	23.3722	23.2932	23.8106	23.7412	23.713
+	1.89416	-1.30474	P35711;P35711-2;P35711-4;P35711-5	P35711;P35712;P35712-2;P35712-3;P35712-4;P35711-2;P35711-4;P35711-5;I3L0A5;F5H0I3	SOX5_HUMAN	SOX5	Transcription factor SOX-5	14.5741	15.44	14.8444	16.4484	16.3947	15.9296
+	2.10834	-0.838724	P39880;P39880-2;P39880-3;P39880-5	P39880;A0A2R8Y852;A0A2R8YDI1;P39880-2;P39880-3;P39880-4;P39880-5;P39880-6	CUX1_HUMAN	CUX1	Homeobox protein cut-like 1	16.5158	16.7753	16.9113	17.4163	17.8172	17.4852
+	1.94064	-0.573729	P41091	Q2VIR3;P41091;Q2VIR3-2	IF2G_HUMAN	EIF2S3	Eukaryotic translation initiation factor 2 subunit 3	23.4474	23.7753	23.8597	24.2671	24.323	24.2135
+	3.19295	-3.62207	P42126;P42126-2	P42126;P42126-2	ECI1_HUMAN	ECI1	Enoyl-CoA delta isomerase 1, mitochondrial	14.9652	13.6911	14.502	17.9848	17.9487	18.0909
+	3.06569	-0.87967	P42568	P42568;P42568-2	AF9_HUMAN	MLLT3	Protein AF-9	18.4361	18.6323	18.4558	19.5114	19.2498	19.402
+	1.9642	-0.545684	P46940	P46940;H0YLE8	IQGA1_HUMAN	IQGAP1	Ras GTPase-activating-like protein IQGAP1	23.3956	23.7266	23.757	24.1395	24.2451	24.1315
+	2.70954	-0.46457	P47897	P47897;C9J165;A0A0U1RQM8;A0A0U1RQT0;A0A0U1RQE9;A0A0U1RRI9;A0A1B0GVU9;P47897-2	SYQ_HUMAN	QARS1	Glutamine--tRNA ligase	22.0762	22.2916	22.1651	22.6189	22.6712	22.6366
+	1.75017	-0.800788	P48059-2	P48059;P48059-2;P48059-3;P48059-4;P48059-5;A0A0J9YXC7;A0A0M3HER1;A0A8Q3WLX8;A0A8Q3WLN4;A0A8Q3WKJ2;A0A8Q3WKI3;A0A8Q3WKK6;A0A8Q3WKP0	LIMS1_HUMAN	LIMS1	Isoform of P48059, Isoform 2 of LIM and senescent cell antigen-like-containing domain protein 1	19.0995	19.7538	19.3868	20.1197	20.3765	20.1463
+	2.03097	-0.675686	P49585	P49585;C9J2E1;C9J050;C9JEJ2;H7BZN1;H7C1T3	PCY1A_HUMAN	PCYT1A	Choline-phosphate cytidylyltransferase A	19.7302	20.0549	19.9709	20.5359	20.7998	20.4474
+	3.39465	-0.319953	P49916-3	P49916;P49916-2;P49916-3;P49916-4;K7ENR9;K7ERZ5	DNLI3_HUMAN	LIG3	Isoform of P49916, Isoform 3 of DNA ligase 3	20.6753	20.6191	20.7071	20.9671	21.0145	20.9797
+	2.76441	0.355001	P51114	P51114;E7EU85;B4DXZ6;E9PFF5;A0A8V8TNP6;A0A8V8TMQ1;P51114-2;P51114-3	FXR1_HUMAN	FXR1	RNA-binding protein FXR1	24.4103	24.3724	24.495	24.0833	24.1169	24.0125
+	4.01479	-1.51853	P51398;P51398-2;P51398-3	P51398;V9GYL9;V9GZ03;P51398-2;P51398-3	RT29_HUMAN	DAP3	28S ribosomal protein S29, mitochondrial	20.2956	20.4203	20.1057	21.8409	21.8041	21.7323
+	1.79902	1.50686	P51511	P51511	MMP15_HUMAN	MMP15	Matrix metalloproteinase-15	18.1795	19.4558	18.6496	17.2351	17.1948	17.3345
+	1.67844	-0.913367	P51825-2;P51825-3	P51825;P51825-2;P51825-3;A0A669KBI3;F5GXF9	AFF1_HUMAN	AFF1	Isoform of P51825, Isoform 2 of AF4/FMR2 family member 1	18.7388	18.0756	18.8586	19.4112	19.5557	19.4462
+	4.84325	-0.635776	P53621	P53621;P53621-2;A0A3B3IS84;A0A3B3IT15;A0A3B3ISC6;A0A3B3ITV3;A0A3B3IU89	COPA_HUMAN	COPA	Coatomer subunit alpha	22.2612	22.3148	22.3319	22.932	22.9638	22.9194
+	2.66762	-0.758769	P54577	P54577;A0A6Q8PFX2	SYYC_HUMAN	YARS1	Tyrosine--tRNA ligase, cytoplasmic	21.785	22.1125	22.0303	22.6629	22.8152	22.7259
+	2.02064	-0.743668	P55010	P55010	IF5_HUMAN	EIF5	Eukaryotic translation initiation factor 5	21.59	22.0907	21.9619	22.5355	22.7202	22.6178
+	2.25312	-3.14934	P55199	P55199;U3KQ90	ELL_HUMAN	ELL	RNA polymerase II elongation factor ELL	16.1174	14.3737	14.459	18.0184	18.3725	18.0072
+	3.60388	-0.383764	P55884;P55884-2	P55884;P55884-2;C9JZG1;C9JQN7	EIF3B_HUMAN	EIF3B	Eukaryotic translation initiation factor 3 subunit B	26.2132	26.1415	26.2221	26.5598	26.5567	26.6117
+	4.17868	-0.451672	P60228	P60228;B3KW56;E5RGA2;E5RHS5;A0A7I2V2H9;A0A7I2V2W0;A0A7I2V3I0;A0A7I2V3I2;A0A7I2V3S3;A0A7I2V4B4;A0A7I2V5P9;A0A7I2V5Z6	EIF3E_HUMAN	EIF3E	Eukaryotic translation initiation factor 3 subunit E	25.7789	25.7049	25.77	26.183	26.2016	26.2242
+	1.34308	-2.14201	P61244;P61244-2;P61244-3;P61244-4	P61244;P61244-2;P61244-3;P61244-4;P61244-5;P61244-6;G3V563;G3V2R5;A0A494C130;Q6V3B1	MAX_HUMAN	MAX	Protein max	16.1946	14.3601	16.8012	18.0453	18.0762	17.6604
+	2.79149	-0.851646	P62068;P62068-2;P62068-3;P62068-4	P62068;P62068-2;P62068-3;P62068-4;H7BZK6	UBP46_HUMAN	USP46	Ubiquitin carboxyl-terminal hydrolase 46	16.8465	17.0021	16.9903	17.9184	17.8769	17.5985
+	3.63547	-1.07275	P67870	P67870;N0E472;Q5SRQ3;Q5SRQ6;A0A7I2YQ78;A0A0G2JM12	CSK2B_HUMAN	CSNK2B	Casein kinase II subunit beta	22.7518	22.9386	23.0401	23.9616	24.0067	23.9805
+	3.79033	-1.13901	P68400	Q8NEV1;P68400;A0A2R8Y7T1;A0A2R8Y797;A0A2R8Y3W6;A0A2R8Y5A0;A0A2R8Y4H0;A0A2R8Y4D6;E7EU96;A0A2R8YDY7;A0A2R8YDP2;A0A2R8YD58;A0A2R8YCK2;A0A2R8YFU2;A0A2R8YEW1;A0A2R8YF43;A0A2R8YF47;A0A2R8YEL7;V9GY80;V9GYA2	CSK21_HUMAN	CSNK2A1	Casein kinase II subunit alpha	22.4563	22.6005	22.718	23.6708	23.7337	23.7873
+	5.71169	-0.818913	P82650	P82650;H7C5H3;H7C5L9;H7C5F2;G5E9W7;P82650-2;A0A8I5KQR7;A0A8I5KSY5;A0A8I5KX02;A0A8I5KYF1;A0A7P0MKV3	RT22_HUMAN	MRPS22	28S ribosomal protein S22, mitochondrial	21.6312	21.6809	21.6799	22.4746	22.47	22.504
+	3.07801	-0.725367	P82663	P82663;E7EPW2;A0A8Q3WKE1;A0A8Q3WKH6;A0A8Q3WKJ5;A0A8Q3WLJ1;A0A8Q3SHU8;P82663-2;P82663-3	RT25_HUMAN	MRPS25	28S ribosomal protein S25, mitochondrial	19.8274	19.7272	19.5972	20.4173	20.5301	20.3805
+	1.71791	-2.82145	P82673	P82673	RT35_HUMAN	MRPS35	28S ribosomal protein S35, mitochondrial	17.7847	17.9173	15.6299	19.903	19.8649	20.0284
+	2.86315	-1.12755	P82675	P82675;P82675-2;A0A8Q3WKG3;A0A8Q3WKL2;A0A8Q3SIP9;A0A8Q3SHY8	RT05_HUMAN	MRPS5	28S ribosomal protein S5, mitochondrial	19.7484	20.1726	20.1774	21.1558	21.1648	21.1605
+	4.55423	-1.51799	P82912;P82912-2	P82912;P82912-2;P82912-3	RT11_HUMAN	MRPS11	28S ribosomal protein S11, mitochondrial	19.8306	19.8145	19.6258	21.2841	21.2258	21.3151
+	3.63109	-1.08006	P82914	P82914	RT15_HUMAN	MRPS15	28S ribosomal protein S15, mitochondrial	20.054	20.2897	20.1436	21.1875	21.1932	21.3468
+	2.25731	-2.73546	P82921	P82921	RT21_HUMAN	MRPS21	28S ribosomal protein S21, mitochondrial	16.9246	17.3687	15.7003	19.2971	19.5066	19.3962
+	2.74144	-0.639126	P82930	P82930;C9JJ19	RT34_HUMAN	MRPS34	28S ribosomal protein S34, mitochondrial	21.4419	21.3736	21.1996	21.9994	21.8851	22.0481
+	2.12774	-2.28837	P82932	P82932	RT06_HUMAN	MRPS6	28S ribosomal protein S6, mitochondrial	16.1349	17.565	17.3868	19.2075	19.2714	19.4731
+	3.00298	-1.11294	P82933	P82933	RT09_HUMAN	MRPS9	28S ribosomal protein S9, mitochondrial	20.6181	20.854	20.4145	21.7152	21.723	21.7872
+	3.15478	1.0477	P98160	P98160	PGBM_HUMAN	HSPG2	Basement membrane-specific heparan sulfate proteoglycan core protein	20.1004	20.0674	19.798	18.8421	18.9449	19.0356
+	3.72927	-0.376571	Q00059	Q00059;Q00059-2;H7BYN3	TFAM_HUMAN	TFAM	Transcription factor A, mitochondrial	22.5699	22.6564	22.6004	22.9972	22.9599	22.9994
+	3.86942	-4.97345	Q01105	Q01105;A0A8I5KS71;A0A8I5KTZ2	SET_HUMAN	SET	Protein SET	14.9603	15.1263	15.6115	19.7831	20.0875	20.7478
+	4.59639	-3.18979	Q01105-2	P0DME0;Q01105;Q01105-2;Q01105-3;Q01105-4;A0A8J8YYJ1;A0A8I5KS71;A0A0C4DFV9	SET_HUMAN	SET	Isoform of Q01105, Isoform 2 of Protein SET	21.1319	20.8114	21.0912	24.2543	23.9999	24.3497
+	1.49298	-1.29667	Q03111	Q03111	ENL_HUMAN	MLLT1	Protein ENL	18.9658	18.6692	18.1014	19.7083	20.4798	19.4382
+	1.8251	-0.635806	Q05397;Q05397-5;Q05397-7	Q05397;E7ESA6;H0YBZ1;Q05397-2;Q05397-3;Q05397-5;Q05397-7;H0YBP1;H0YB16;E9PEI4;A0A8Q3WLM4	FAK1_HUMAN	PTK2	Focal adhesion kinase 1	19.2632	19.4628	19.2637	19.8221	20.2467	19.8284
+	2.53473	0.40485	Q06787-8	Q06787;A8MQB8;G3V0J0;Q06787-2;Q06787-3;Q06787-4;Q06787-5;Q06787-6;Q06787-7;Q06787-8;Q06787-9;Q06787-10;Q06787-11;A0A8I5KS01;A0A8I5KTZ9;A0A8I5KTT6;A0A8I5KUC2;A0A8I5KT56;A0A8I5KWH0;A0A8I5KYA7;A0A8I5KZ21;A0A087WVL8;A0A087WXI3;A0A087WY29	FMR1_HUMAN	FMR1	Isoform of Q06787, Isoform 8 of Fragile X messenger ribonucleoprotein 1	23.7006	23.672	23.7775	23.3413	23.3869	23.2072
+	2.52083	-3.25716	Q06945	Q06945	SOX4_HUMAN	SOX4	Transcription factor SOX-4	14.3875	16.0554	15.6722	18.5335	18.7011	18.6519
+	2.87523	0.530473	Q08211	Q08211	DHX9_HUMAN	DHX9	ATP-dependent RNA helicase A	24.9588	24.899	24.7463	24.3761	24.3292	24.3073
+	1.99533	-0.87451	Q09472	Q09472;A0A0U1RR87;A0A669KB12	EP300_HUMAN	EP300	Histone acetyltransferase p300	19.0038	19.1581	19.6359	20.1216	20.1499	20.1498
+	1.92398	-0.649137	Q0JRZ9	Q0JRZ9;Q0JRZ9-3	FCHO2_HUMAN	FCHO2	F-BAR domain only protein 2	19.1598	19.4264	19.6699	20.0458	20.1025	20.0553
+	2.57027	-0.423881	Q12904	Q12904;A0A8C8MUD1;A0A8C8KIA0;Q12904-2;A0A804HJ47;A0A5F9ZHC5	AIMP1_HUMAN	AIMP1	Aminoacyl tRNA synthase complex-interacting multifunctional protein 1	22.2818	22.4848	22.3821	22.7748	22.8576	22.788
+	2.40777	-0.767714	Q13017;Q13017-2	Q13017;Q13017-2	RHG05_HUMAN	ARHGAP5	Rho GTPase-activating protein 5	18.3477	18.596	18.7704	19.3258	19.4093	19.2822
+	3.1935	-0.527261	Q13042	Q13042;Q13042-2;Q13042-3;Q13042-4;Q5T8C6;A0A3B3ISD2	CDC16_HUMAN	CDC16	Cell division cycle protein 16 homolog	19.8953	19.8408	19.7167	20.3348	20.3284	20.3714
+	4.11143	2.58027	Q13085	Q13085;Q13085-2;Q13085-3;Q13085-4;Q59FY4;A0A087WWN5	ACACA_HUMAN	ACACA	Acetyl-CoA carboxylase 1	25.2637	25.3918	24.9481	22.5434	22.786	22.5335
+	2.43056	-0.605984	Q13111	Q13111;Q13111-2;Q13111-3	CAF1A_HUMAN	CHAF1A	Chromatin assembly factor 1 subunit A	17.9833	18.2416	18.1471	18.7669	18.6031	18.82
+	1.87366	-0.621639	Q13155-2	Q13155-2	AIMP2_HUMAN	AIMP2	Isoform of Q13155, Isoform 2 of Aminoacyl tRNA synthase complex-interacting multifunctional protein 2	16.4716	16.6554	16.1802	17.1501	17.0415	16.9805
+	2.71321	-0.664699	Q13428-3	Q13428;Q13428-2;Q13428-3;Q13428-4;Q13428-5;Q13428-6;Q13428-7;Q13428-8;E7ETY2;H0Y8Y7;A0A6I8PRA0;A0A3B3IS06	TCOF_HUMAN	TCOF1	Isoform of Q13428, Isoform 3 of Treacle protein	22.6942	22.745	22.9527	23.5434	23.3815	23.461
+	2.5191	-0.585032	Q13428-6	Q13428;Q13428-2;Q13428-4;Q13428-6	TCOF_HUMAN	TCOF1	Isoform of Q13428, Isoform 6 of Treacle protein	20.329	20.0418	20.253	20.8527	20.7531	20.7731
+	2.45604	-2.09006	Q13444;Q13444-3;Q13444-5	Q13444;Q13444-2;Q13444-3;Q13444-4;Q13444-5;Q13444-6;Q13444-7;Q13444-8;Q13444-9;Q13444-10;Q13444-11;Q13444-12;Q13444-13	ADA15_HUMAN	ADAM15	Disintegrin and metalloproteinase domain-containing protein 15	14.3977	14.8585	15.4331	17.0916	16.6759	17.192
+	4.50264	1.1796	Q13501	Q13501;C9J6J8;D6RBF1;E3W990;E7EMC7	SQSTM_HUMAN	SQSTM1	Sequestosome-1	23.4657	23.5463	23.4141	22.3551	22.3165	22.2156
+	2.47076	-0.49898	Q13569	Q13569;G8JL98;H0YH18;B4E127;F5H0I7	TDG_HUMAN	TDG	G/T mismatch-specific thymine DNA glycosylase	19.0089	18.9636	19.1278	19.4056	19.5962	19.5955
+	2.24066	-0.766822	Q13576	Q13576;Q13576-2;Q13576-3;F5H7S7	IQGA2_HUMAN	IQGAP2	Ras GTPase-activating-like protein IQGAP2	21.1643	21.5135	21.0514	21.9526	22.0206	22.0565
+	2.53339	-0.463127	Q13613	Q13613;F8WA39;Q8NEC6;H0YDX3;E9PIH9;Q13613-2	MTMR1_HUMAN	MTMR1	Myotubularin-related protein 1	17.4264	17.6457	17.5623	18.029	18.05	17.9449
+	2.78314	-0.374447	Q13887	Q13887;Q13887-4	KLF5_HUMAN	KLF5	Krueppel-like factor 5	18.516	18.444	18.5672	18.8174	18.9327	18.9004
+	5.59992	-1.33126	Q13895	Q13895	BYST_HUMAN	BYSL	Bystin	23.4052	23.3849	23.365	24.7308	24.6553	24.7628
+	2.5339	0.520082	Q14145	Q14145;K7EJD8;K7EJ49;K7ESE0	KEAP1_HUMAN	KEAP1	Kelch-like ECH-associated protein 1	20.2815	20.1696	20.1968	19.8365	19.6587	19.5925
+	2.72885	-0.415265	Q14152	Q14152;Q14152-2	EIF3A_HUMAN	EIF3A	Eukaryotic translation initiation factor 3 subunit A	25.9896	25.9663	26.1327	26.4017	26.4526	26.48
+	4.95071	0.342854	Q14157-1	Q14157;F8W726;Q14157-1;Q14157-3;Q14157-4;Q14157-5	UBP2L_HUMAN	UBAP2L	Isoform of Q14157, Isoform 2 of Ubiquitin-associated protein 2-like	24.1711	24.16	24.1794	23.8459	23.8067	23.8294
+	2.33454	-0.672122	Q14185	Q14185;A0A096LNH6	DOCK1_HUMAN	DOCK1	Dedicator of cytokinesis protein 1	18.8461	19.192	18.891	19.5616	19.7121	19.6718
+	1.95777	-0.552121	Q14258	Q14258;A0A3B3IUA7	TRI25_HUMAN	TRIM25	E3 ubiquitin/ISG15 ligase TRIM25	20.4956	20.8852	20.7302	21.1714	21.3408	21.2552
+	3.72407	0.492724	Q14331	Q14331;E9PRR7	FRG1_HUMAN	FRG1	Protein FRG1	23.2816	23.3129	23.2191	22.7463	22.7614	22.8278
+	3.31439	-0.441495	Q14527	Q14527;A0A0C4DGA6	HLTF_HUMAN	HLTF	Helicase-like transcription factor	22.0804	22.1977	22.0726	22.5773	22.5645	22.5334
+	1.81316	-0.806999	Q14554	Q14554	PDIA5_HUMAN	PDIA5	Protein disulfide-isomerase A5	19.0421	19.71	19.4652	20.1695	20.2898	20.1789
+	2.05156	-1.80991	Q14596;Q14596-2	Q14596;Q14596-2	NBR1_HUMAN	NBR1	Next to BRCA1 gene 1 protein	15.7456	15.2603	16.2527	17.2552	18.0569	17.3762
+	1.91475	-0.640997	Q14738	Q14738;E9PFR3;Q14738-2	2A5D_HUMAN	PPP2R5D	Serine/threonine-protein phosphatase 2A 56 kDa regulatory subunit delta isoform	18.825	19.1942	19.2776	19.7517	19.818	19.6501
+	2.08781	-0.500933	Q14839;Q14839-2	Q14839;A0A2R8Y212;A0A2R8Y8C1;A0A2R8Y7I0;A0A2R8Y7M9;A0A2R8Y425;A0A2R8Y5J0;A0A2R8Y5M9;A0A2R8Y4X2;A0A2R8Y521;A0A2R8YDW2;A0A2R8YE38;A0A2R8YDJ9;A0A2R8YD40;A0A2R8YFK9;A0A2R8YFD8;A0A2R8YER1;A0A2U3TZM0;F5GWX5;Q14839-2;A0A0C4DGG9;A0A2R8Y445	CHD4_HUMAN	CHD4	Chromodomain-helicase-DNA-binding protein 4	21.7252	22.0297	22.0168	22.3973	22.4761	22.4011
+	1.59204	-0.881048	Q14919;Q14919-2	Q14919;Q14919-2;C9JCC6;E9PQX9;E9PNC7	NC2A_HUMAN	DRAP1	Dr1-associated corepressor	19.899	19.7907	20.5846	20.8699	21.0121	21.0354
+	4.32915	-2.03043	Q14978-2	A0A0A0MRM9;Q14978-2	NOLC1_HUMAN	NOLC1	Isoform of Q14978, Isoform Beta of Nucleolar and coiled-body phosphoprotein 1	23.9906	24.1211	24.323	26.2525	26.088	26.1855
+	3.37159	-2.33864	Q14978-3	S4R341;Q14978-3	NOLC1_HUMAN	NOLC1	Isoform of Q14978, Isoform 3 of Nucleolar and coiled-body phosphoprotein 1	20.9033	20.9322	20.9388	23.2287	22.9055	23.656
+	1.80663	-0.593599	Q15003	Q15003;C9J470;C9JZP1;E9PHA2	CND2_HUMAN	NCAPH	Condensin complex subunit 2	21.1668	21.6427	21.4962	22.0298	22.1015	21.9551
+	2.2169	-0.586292	Q15021	Q15021	CND1_HUMAN	NCAPD2	Condensin complex subunit 1	21.18	21.5518	21.3866	21.9286	22.0098	21.9388
+	2.61529	0.544909	Q15370;Q15370-2	Q15370;B8ZZU8;Q15370-2;A0A0B4J296;A0A8I5KUS5;I3L0M9	ELOB_HUMAN	ELOB	Elongin-B	21.8523	21.7026	21.9169	21.212	21.3736	21.2515
+	2.21108	-0.536566	Q15404	Q15404	RSU1_HUMAN	RSU1	Ras suppressor protein 1	19.3826	19.649	19.6472	19.9981	20.1599	20.1305
+	6.30322	-0.93653	Q15650	Q15650;H0YL91;H3BMU9	TRIP4_HUMAN	TRIP4	Activating signal cointegrator 1	24.0341	23.9844	24.0269	24.9575	24.952	24.9455
+	1.87019	-2.29977	Q15751	Q15751	HERC1_HUMAN	HERC1	Probable E3 ubiquitin-protein ligase HERC1	14.5472	15.1928	15.9806	17.022	17.381	18.2169
+	2.36638	-0.510712	Q16181	Q16181;A0A0U1RRE1;A0A0U1RRH9;E7ES33;E7EPK1;Q16181-2;G3V1Q4;A0A024RA87	SEPT7_HUMAN	SEPTIN7	Septin-7	21.9418	22.1576	22.0958	22.6143	22.6541	22.4589
+	2.57108	-0.514994	Q16630-2	Q16630;Q16630-2;Q16630-3;F8WJN3	CPSF6_HUMAN	CPSF6	Isoform of Q16630, Isoform 2 of Cleavage and polyadenylation specificity factor subunit 6	21.7481	21.9459	21.9803	22.3549	22.4525	22.412
+	1.8841	-0.804873	Q16666;Q16666-2;Q16666-3	Q16666;H3BR88;Q16666-2;Q16666-3;Q16666-6	IF16_HUMAN	IFI16	Gamma-interferon-inducible protein 16	17.7516	18.0041	17.3667	18.5858	18.4713	18.4799
+	2.67246	0.422145	Q1KMD3	Q1KMD3;H3BQZ7	HNRL2_HUMAN	HNRNPUL2	Heterogeneous nuclear ribonucleoprotein U-like protein 2	20.6845	20.6805	20.7273	20.3751	20.1745	20.2763
+	2.57272	-0.570755	Q2M389	Q2M389;Q2M389-2;A0A087X256	WASC4_HUMAN	WASHC4	WASH complex subunit 4	19.8991	20.0196	19.8155	20.4636	20.5982	20.3847
+	3.74382	-0.787546	Q2NL82	Q2NL82	TSR1_HUMAN	TSR1	Pre-rRNA-processing protein TSR1 homolog	26.1723	26.3067	26.2926	27.0301	26.9829	27.1211
+	4.18843	-1.8569	Q3L8U1;Q3L8U1-2;Q3L8U1-3	Q3L8U1;H3BTW3;Q3L8U1-2;Q3L8U1-3;A0A087WU44	CHD9_HUMAN	CHD9	Chromodomain-helicase-DNA-binding protein 9	17.5858	17.4836	17.2355	19.2529	19.2836	19.339
+	2.67905	-0.436899	Q5H9U9	Q5H9U9;A0A804HKC9;Q5H9U9-2	DDX6L_HUMAN	DDX60L	Probable ATP-dependent RNA helicase DDX60-like	20.4968	20.5412	20.5648	20.9624	20.8748	21.0763
+	2.82977	-0.462183	Q5JSZ5	Q5JSZ5;Q5JSZ5-5;A0A804HKL6	PRC2B_HUMAN	PRRC2B	Protein PRRC2B	22.5072	22.4912	22.648	22.9872	22.9704	23.0753
+	4.84246	-1.26453	Q5JTH9	Q5JTH9;Q5JTH9-2;Q5JTH9-3	RRP12_HUMAN	RRP12	RRP12-like protein	23.5157	23.6003	23.5198	24.7759	24.761	24.8925
+	2.88609	-0.532208	Q5T0N5-3;Q5T0N5-4	Q5T0N5;A0A075B6Q2;Q5T0N5-2;Q5T0N5-3;Q5T0N5-4;Q5T0N5-5	FBP1L_HUMAN	FNBP1L	Isoform of Q5T0N5, Isoform 3 of Formin-binding protein 1-like	19.7377	19.8963	19.8214	20.2556	20.4064	20.39
+	2.05459	-0.748613	Q5T8P6-3	Q5T8P6-3;Q5T8P6-4;Q5T8P6-5;A0A087X0H9	RBM26_HUMAN	RBM26	Isoform of Q5T8P6, Isoform 3 of RNA-binding protein 26	18.0629	18.0317	18.4242	18.797	19.1045	18.8631
+	1.89665	-0.911427	Q64LD2	Q64LD2;G3V367;G3V2K8	WDR25_HUMAN	WDR25	WD repeat-containing protein 25	15.1609	14.7473	14.6007	15.6297	16.0072	15.6063
+	3.54649	-4.17801	Q658P3;Q658P3-2;Q658P3-3;Q658P3-4	Q658P3;Q658P3-2;Q658P3-3;Q658P3-4;B8ZZX6	STEA3_HUMAN	STEAP3	Metalloreductase STEAP3	15.2016	15.0268	14.1065	19.0017	19.0789	18.7883
+	3.13396	-0.331182	Q659C4	Q659C4;D6R9W6;H0Y9K3;G3V0E9;Q659C4-3;Q659C4-9;A0A3B3ISF0;A0A3B3ISF8;A0A3B3IT29	LAR1B_HUMAN	LARP1B	La-related protein 1B	21.2677	21.2214	21.1925	21.5034	21.5944	21.5773
+	2.45528	-0.594604	Q68CQ4	Q68CQ4	UTP25_HUMAN	UTP25	U3 small nucleolar RNA-associated protein 25 homolog	20.5859	20.7881	20.7496	21.2121	21.2465	21.4487
+	2.53035	-0.857877	Q6IE81;Q6IE81-2	Q6IE81;Q6IE81-3;Q6IE81-2	JADE1_HUMAN	JADE1	Protein Jade-1	18.7267	18.3158	18.5719	19.3342	19.344	19.5099
+	3.77794	-0.882644	Q6NYC1;Q6NYC1-2;Q6NYC1-3	Q6NYC1;B2WTI3;B2WTI4;Q6NYC1-2;Q6NYC1-3;K7EJU9	JMJD6_HUMAN	JMJD6	Bifunctional arginine demethylase and lysyl-hydroxylase JMJD6	20.1275	20.2001	20.0136	20.9779	20.9469	21.0643
+	4.71699	-0.42921	Q6P158	Q6P158;H7C109	DHX57_HUMAN	DHX57	Putative ATP-dependent RNA helicase DHX57	24.3336	24.351	24.3668	24.7492	24.7997	24.7901
+	2.28892	-0.624405	Q6PD62	Q6PD62	CTR9_HUMAN	CTR9	RNA polymerase-associated protein CTR9 homolog	25.455	25.5578	25.3698	26.0323	26.2759	25.9476
+	3.12897	0.593356	Q6PJ69	Q6PJ69	TRI65_HUMAN	TRIM65	Tripartite motif-containing protein 65	22.1264	22.2	22.1692	21.6824	21.4757	21.5574
+	3.55563	-0.402339	Q6PKG0	Q6PKG0;A0A8I5KSP1;A0A8I5KWU3;Q6PKG0-3	LARP1_HUMAN	LARP1	La-related protein 1	27.9685	27.8827	27.9357	28.3061	28.3117	28.3761
+	1.90628	-0.722476	Q6VY07	Q6VY07;B4DF77;E9PNZ9;Q6VY07-2	PACS1_HUMAN	PACS1	Phosphofurin acidic cluster sorting protein 1	19.1606	19.674	19.6148	20.1622	20.2861	20.1685
+	1.56207	-2.15111	Q6WKZ4;Q6WKZ4-3	Q6WKZ4;Q6WKZ4-3;Q6WKZ4-5	RFIP1_HUMAN	RAB11FIP1	Rab11 family-interacting protein 1	15.7863	17.6934	17.4315	18.8003	19.5239	19.0404
+	4.17388	-4.62659	Q6ZXV5;Q6ZXV5-2	Q6ZXV5;Q6ZXV5-2	TMTC3_HUMAN	TMTC3	Protein O-mannosyl-transferase TMTC3	16.0165	15.6321	15.239	20.1331	20.0836	20.5508
+	2.11244	-3.14481	Q70CQ2	Q70CQ2;Q70CQ2-2;Q70CQ2-3	UBP34_HUMAN	USP34	Ubiquitin carboxyl-terminal hydrolase 34	17.7658	16.3871	17.506	19.9367	19.8481	21.3086
+	2.50119	-0.502595	Q70E73	Q70E73;Q70E73-2;Q70E73-5;C9J164	RAPH1_HUMAN	RAPH1	Ras-associated and pleckstrin homology domains-containing protein 1	18.5771	18.7678	18.567	19.1153	19.2267	19.0777
+	2.0847	-0.559681	Q7L2H7	Q7L2H7;J3KNJ2;E9PN86	EIF3M_HUMAN	EIF3M	Eukaryotic translation initiation factor 3 subunit M	24.3666	24.1092	23.9818	24.7446	24.6754	24.7166
+	2.24942	-0.493284	Q7L576	Q7L576;A0A0G2JR96;A0A0G2JQT1;A0A087WVZ5	CYFP1_HUMAN	CYFIP1	Cytoplasmic FMR1-interacting protein 1	20.965	21.2312	20.9773	21.5207	21.6064	21.5263
+	1.32347	-1.79135	Q7L5Y9	Q7L5Y9;E7ESC7;D6RIB6;D6REW7;Q7L5Y9-2;Q7L5Y9-3;Q7L5Y9-4;Q7L5Y9-5;D6RA86;D6RDW4;D6RE80;D6R8Z3	MAEA_HUMAN	MAEA	E3 ubiquitin-protein transferase MAEA	14.6684	16.5613	16.0617	18.1232	17.2634	17.2788
+	2.15451	-0.55314	Q7LBC6	Q7LBC6;Q7LBC6-2;Q7LBC6-3	KDM3B_HUMAN	KDM3B	Lysine-specific demethylase 3B	19.2976	19.3571	19.5056	19.8024	20.1072	19.9102
+	2.70836	-0.753488	Q7Z2W9;Q7Z2W9-2	Q7Z2W9;H3BUY0;Q7Z2W9-2;F5H7V8	RM21_HUMAN	MRPL21	39S ribosomal protein L21, mitochondrial	16.9209	17.0965	17.0785	17.8646	17.6092	17.8826
+	2.19025	-0.522846	Q7Z460-4	Q7Z460;F8WA11;H0Y5T1;Q7Z460-2;Q7Z460-3;Q7Z460-4;Q7Z460-5;A0A8V8TRF6;A0A8V8TQK9;A0A8V8TLP7	CLAP1_HUMAN	CLASP1	Isoform of Q7Z460, Isoform 4 of CLIP-associating protein 1	20.2574	20.3709	20.5651	20.852	21.0043	20.9057
+	4.46562	-1.74972	Q7Z4V5	Q7Z4V5;Q9Y3E1;Q7Z4V5-2;Q7Z4V5-3;Q7Z4V5-4;M0R0J3	HDGR2_HUMAN	HDGFL2	Hepatoma-derived growth factor-related protein 2	23.0096	23.2389	23.1834	24.7918	24.9412	24.948
+	1.87881	-0.569859	Q86UE8;Q86UE8-2	Q9UKI8;Q86UE8;J3KRK0;Q9UKI8-2;Q9UKI8-3;Q9UKI8-4;Q9UKI8-5;A0A804HIB4;Q86UE8-2;Q86UE8-3;A0A804HK10;A0A804HJX3;A0A804HJZ9;A0A804HKF1;J3QLK5	TLK2_HUMAN	TLK2	Serine/threonine-protein kinase tousled-like 2	17.6625	18.0886	17.9735	18.4397	18.5635	18.431
+	2.56809	-0.729733	Q86V97	Q86V97;Q8WVZ9	KBTB6_HUMAN	KBTBD6	Kelch repeat and BTB domain-containing protein 6	17.748	17.9138	18.0312	18.4936	18.6414	18.7473
+	1.74267	-0.723459	Q86WP2;Q86WP2-2;Q86WP2-3	Q86WP2;Q86WP2-3;Q86WP2-4;Q86WP2-2;D4PHA4	GPBP1_HUMAN	GPBP1	Vasculin	17.2048	16.7201	17.0656	17.5119	17.926	17.7231
+	3.25878	-5.03053	Q8IWT3	Q8IWT3;Q8IWT3-3;E9PEZ1	CUL9_HUMAN	CUL9	Cullin-9	15.9514	14.25	15.2899	20.1566	20.3348	20.0915
+	2.99049	-0.574007	Q8IY57;Q8IY57-3;Q8IY57-5	Q8IY57;Q8IY57-3;Q8IY57-5	YAF2_HUMAN	YAF2	YY1-associated factor 2	17.6191	17.6383	17.6389	18.2003	18.3245	18.0936
+	3.06216	-1.05234	Q8IY63;Q8IY63-2	Q8IY63;Q8IY63-2	AMOL1_HUMAN	AMOTL1	Angiomotin-like protein 1	15.1438	15.4977	15.4534	16.4029	16.4897	16.3593
+	2.6048	-0.699957	Q8N1G4	Q8N1G4	LRC47_HUMAN	LRRC47	Leucine-rich repeat-containing protein 47	21.2456	21.4616	21.4242	21.9244	22.1891	22.1178
+	5.26492	-1.05898	Q8N3C0	Q8N3C0	ASCC3_HUMAN	ASCC3	Activating signal cointegrator 1 complex subunit 3	24.2074	24.2113	24.1592	25.2504	25.2036	25.3009
+	2.60769	-0.568276	Q8N4C8	Q8N4C8;O95819;Q9UKE5;E7EX83;Q8N4C8-2;Q8N4C8-3;Q8N4C8-4;Q8N4C8-5;A0A0D9SEY1;O95819-2;O95819-3;O95819-4;O95819-5;O95819-6;H7C360;H7C0P6;G5E948;Q9UKE5-2;Q9UKE5-3;Q9UKE5-4;Q9UKE5-5;Q9UKE5-6;Q9UKE5-7;Q9UKE5-8;E7EN19;E7ENQ1	MINK1_HUMAN	MINK1	Misshapen-like kinase 1	20.1178	20.2597	20.2695	20.7356	20.9181	20.6981
+	2.75686	0.546567	Q8N5G2	Q8N5G2;Q8N5G2-2;Q8N5G2-3	MACOI_HUMAN	MACO1	Macoilin	18.6363	18.5088	18.663	18.1029	18.121	17.9444
+	2.99475	-0.496845	Q8N5N7	Q8N5N7	RM50_HUMAN	MRPL50	39S ribosomal protein L50, mitochondrial	19.2529	19.3225	19.2124	19.6673	19.7814	19.8296
+	2.1981	-0.516914	Q8N684;Q8N684-2;Q8N684-3	Q8N684;Q8N684-2;Q8N684-3;F5H669	CPSF7_HUMAN	CPSF7	Cleavage and polyadenylation specificity factor subunit 7	21.9569	22.1791	22.0948	22.4558	22.7109	22.6148
+	2.42341	-0.523687	Q8N7H5;Q8N7H5-3	Q8N7H5;Q8N7H5-2;Q8N7H5-3;B4DGJ5	PAF1_HUMAN	PAF1	RNA polymerase II-associated factor 1 homolog	26.2726	26.2839	26.2564	26.7131	26.967	26.7038
+	3.14603	-0.905771	Q8N9N2-2	Q8N9N2;H0YER2;H0YE76;H0YCB3;A0A5F9ZH79;A0A5F9ZHP1;Q8N9N2-2	ASCC1_HUMAN	ASCC1	Isoform of Q8N9N2, Isoform 2 of Activating signal cointegrator 1 complex subunit 1	22.4934	22.5777	22.7994	23.5358	23.5794	23.4726
+	3.32705	-1.27524	Q8N9N8	Q8N9N8;E9PS30;E9PS76;E9PQD0;E9PLI6	EIF1A_HUMAN	EIF1AD	Probable RNA-binding protein EIF1AD	17.8869	17.5738	17.6905	18.8478	19.1264	19.0027
+	3.35619	-0.940676	Q8NC60	Q8NC60	NOA1_HUMAN	NOA1	Nitric oxide-associated protein 1	18.5918	18.3999	18.3558	19.2896	19.4282	19.4517
+	2.58473	-0.710464	Q8NCF5	Q8NCF5	NF2IP_HUMAN	NFATC2IP	NFATC2-interacting protein	18.8561	19.1481	18.869	19.5892	19.6632	19.7521
+	1.74499	-0.665415	Q8NFC6	Q8NFC6;H0Y9Y2	BD1L1_HUMAN	BOD1L1	Biorientation of chromosomes in cell division protein 1-like 1	16.375	16.1144	15.8664	16.7506	16.9528	16.6486
+	1.87929	-0.674749	Q8TBB5	Q8TBB5;Q8TBB5-2;Q8TBB5-3;H3BQH3;Q9UF94	KLDC4_HUMAN	KLHDC4	Kelch domain-containing protein 4	21.0149	21.4932	21.4684	21.9518	21.9859	22.0632
+	3.47596	-1.05494	Q8TBK6;Q8TBK6-2	Q8TBK6;Q8TBK6-2;B3KVL5	ZCH10_HUMAN	ZCCHC10	Zinc finger CCHC domain-containing protein 10	19.2745	19.2206	19.4928	20.3143	20.3861	20.4523
+	1.67952	-2.38281	Q8TBZ3;Q8TBZ3-2;Q8TBZ3-5;Q8TBZ3-6;Q8TBZ3-7	Q8TBZ3;Q8TBZ3-5;Q8TBZ3-7;Q8TBZ3-2;Q8TBZ3-4;Q8TBZ3-6;A0A088AWN2	WDR20_HUMAN	WDR20	WD repeat-containing protein 20	15.2794	15.8551	13.9754	17.5668	17.8966	16.7949
+	2.18259	-0.492698	Q8WVC0	Q8WVC0	LEO1_HUMAN	LEO1	RNA polymerase-associated protein LEO1	25.3153	25.3318	25.3317	25.7542	26.0057	25.6971
+	2.16135	-0.545128	Q92538-2;Q92538-3	Q92538;A0A7P0RGV0;Q92538-2;Q92538-3;A0A7I2YQ65;A0A7I2YQM2;A0A669KBG8;A0A669KB10;A0A7I2V2L5;A0A7I2V452;A0A7I2V514	GBF1_HUMAN	GBF1	Isoform of Q92538, Isoform 2 of Golgi-specific brefeldin A-resistance guanine nucleotide exchange factor 1	19.7427	20.0707	20.0361	20.4725	20.5405	20.4719
+	3.32648	-0.835553	Q92541	Q92541	RTF1_HUMAN	RTF1	RNA polymerase-associated protein RTF1 homolog	21.8145	21.9013	22.0583	22.7474	22.8279	22.7055
+	5.2498	-0.461582	Q92552;Q92552-2	Q92552;Q92552-2;D6RH20;G5EA06;A0A8Q3WKF1;A0A8Q3WKI2;A0A8Q3WK88;A0A8Q3WKZ8;A0A8Q3WL16;A0A8Q3SHR4	RT27_HUMAN	MRPS27	28S ribosomal protein S27, mitochondrial	21.349	21.3873	21.3588	21.8372	21.8332	21.8095
+	4.81476	-2.06098	Q92665	Q92665	RT31_HUMAN	MRPS31	28S ribosomal protein S31, mitochondrial	18.5286	18.4158	18.6413	20.554	20.5248	20.6899
+	2.86794	-1.28415	Q92688;Q92688-2	Q92688;Q92688-2	AN32B_HUMAN	ANP32B	Acidic leucine-rich nuclear phosphoprotein 32 family member B	20.2145	20.3154	20.6979	21.7796	21.5627	21.738
+	1.90376	-0.582387	Q92917	Q92917	GPKOW_HUMAN	GPKOW	G-patch domain and KOW motifs-containing protein	18.9166	19.195	19.3073	19.5876	19.8138	19.7647
+	2.16484	-0.503146	Q92925;Q92925-2;Q92925-3	Q92925;J3KMX2;A0A8V8TLV3;A0A8V8TLC9;Q92925-2;Q92925-3;J3QWB6	SMRD2_HUMAN	SMARCD2	SWI/SNF-related matrix-associated actin-dependent regulator of chromatin subfamily D member 2	17.9562	18.0487	17.9223	18.4291	18.6545	18.353
+	1.33911	-1.73667	Q92997;Q92997-2	Q92997;Q92997-2;F8WCF1;A0A3B3ISG4	DVL3_HUMAN	DVL3	Segment polarity protein dishevelled homolog DVL-3	17.6721	16.0761	16.3296	18.8382	18.7178	17.7318
+	2.29699	2.87777	Q969H8	Q969H8	MYDGF_HUMAN	MYDGF	Myeloid-derived growth factor	17.1718	17.3026	18.053	14.0612	15.4884	14.3446
+	2.12013	-0.650171	Q96AG4	Q96AG4	LRC59_HUMAN	LRRC59	Leucine-rich repeat-containing protein 59	23.8758	24.2926	24.2336	24.7742	24.7781	24.8002
+	2.7451	-0.524261	Q96B01;Q96B01-2	Q96B01;Q96B01-2	R51A1_HUMAN	RAD51AP1	RAD51-associated protein 1	20.3329	20.3372	20.3394	20.7983	20.7815	21.0025
+	2.13974	-0.621186	Q96B36;Q96B36-3	Q96B36;Q96B36-2;Q96B36-3	AKTS1_HUMAN	AKT1S1	Proline-rich AKT1 substrate 1	16.9738	16.692	16.8799	17.4851	17.6192	17.3049
+	4.49921	-2.61561	Q96BP2	Q96BP2	CHCH1_HUMAN	CHCHD1	Coiled-coil-helix-coiled-coil-helix domain-containing protein 1	16.924	17.147	16.7262	19.4828	19.5781	19.5833
+	2.30606	0.499363	Q96CT7	Q96CT7	CC124_HUMAN	CCDC124	Coiled-coil domain-containing protein 124	25.5572	25.3996	25.6953	25.099	25.0163	25.0388
+	1.97477	-2.70917	Q96DA6	Q96DA6;A0A2R8Y817;Q96DA6-2;A0A8I5KQT8;F2Z3A7	TIM14_HUMAN	DNAJC19	Mitochondrial import inner membrane translocase subunit TIM14	16.1312	16.6375	14.6448	18.5563	18.502	18.4827
+	3.05046	-3.1843	Q96DX7	Q96DX7	TRI44_HUMAN	TRIM44	Tripartite motif-containing protein 44	17.2651	16.0655	16.8174	19.9068	19.7605	20.0336
+	1.39043	-2.14498	Q96E22	Q96E22	NGBR_HUMAN	NUS1	Dehydrodolichyl diphosphate synthase complex subunit NUS1	13.4152	15.6721	15.0207	16.3762	17.2767	16.8901
+	1.82799	-1.06496	Q96E29;Q96E29-2;Q96E29-3	Q96E29;Q96E29-2;Q96E29-3;E5RIK9	MTEF3_HUMAN	MTERF3	Transcription termination factor 3, mitochondrial	15.9446	16.6229	16.6973	17.5513	17.6194	17.2889
+	4.14947	-1.65463	Q96EL2	Q96EL2	RT24_HUMAN	MRPS24	28S ribosomal protein S24, mitochondrial	19.2948	19.4342	19.6217	21.0655	21.1026	21.1465
+	2.63363	-1.82815	Q96EV2	Q96EV2;H0Y3K4	RBM33_HUMAN	RBM33	RNA-binding protein 33	22.6817	22.8494	22.3565	24.0158	24.724	24.6322
+	5.31994	-1.55433	Q96EY7	Q96EY7;Q96EY7-2	PTCD3_HUMAN	PTCD3	Pentatricopeptide repeat domain-containing protein 3, mitochondrial	19.6291	19.6047	19.5727	21.1618	21.2291	21.0785
+	1.33844	-1.64422	Q96F07	Q96F07;E7EVJ5;E7EW33;Q96F07-2;H7C229;A0A8V8TNU3	CYFP2_HUMAN	CYFIP2	Cytoplasmic FMR1-interacting protein 2	17.644	15.8873	15.9932	17.9937	18.1934	18.27
+	4.12305	-1.38862	Q96GA3	Q96GA3	LTV1_HUMAN	LTV1	Protein LTV1 homolog	24.1252	23.9142	24.1642	25.4479	25.4098	25.5118
+	2.29125	-0.515805	Q96HR8	Q96HR8	NAF1_HUMAN	NAF1	H/ACA ribonucleoprotein complex non-core subunit NAF1	19.9888	20.0118	19.7587	20.3892	20.391	20.5265
+	3.21098	-0.644103	Q96JJ3	Q96JJ3;Q5JVZ4;Q5JVZ5	ELMO2_HUMAN	ELMO2	Engulfment and cell motility protein 2	19.5821	19.7997	19.6678	20.3538	20.3363	20.2918
+	1.48991	-1.846	Q96K49;Q96K49-2	Q96K49;A0A494BZZ8;H7C0B3;Q96K49-2	TM87B_HUMAN	TMEM87B	Transmembrane protein 87B	15.9186	13.9669	14.8192	16.6304	16.9479	16.6644
+	3.41177	-0.546802	Q96MU7;Q96MU7-2	Q96MU7;Q96MU7-2;J3QR07	YTDC1_HUMAN	YTHDC1	YTH domain-containing protein 1	21.0989	21.0731	21.2114	21.7248	21.6599	21.6391
+	2.1407	-0.928722	Q96PU5;Q96PU5-2;Q96PU5-5;Q96PU5-6;Q96PU5-7	Q96PU5;A0A6Q8PFI7;A0A6Q8PG51;A0A6Q8PGP5;Q96PU5-2;Q96PU5-3;Q96PU5-5;Q96PU5-6;Q96PU5-7	NED4L_HUMAN	NEDD4L	E3 ubiquitin-protein ligase NEDD4-like	17.1678	17.444	16.8267	18.1139	18.1242	17.9866
+	2.79917	1.01316	Q96RQ3	Q96RQ3;E9PHF7	MCCA_HUMAN	MCCC1	Methylcrotonoyl-CoA carboxylase subunit alpha, mitochondrial	21.0195	20.995	20.7454	19.7745	20.1026	19.8431
+	1.90132	-1.21104	Q96RT8;Q96RT8-2	Q96RT8;Q96RT8-2;A0A0G2JSA7;A0A0G2JQX1;A0A0G2JPW5;A0A087X006;A0A087X1Z1	GCP5_HUMAN	TUBGCP5	Gamma-tubulin complex component 5	16.4158	16.0011	15.5759	17.4502	17.2175	16.9582
+	4.71347	-1.98408	Q96ST2	Q96ST2;Q96ST2-2;Q96ST2-3;A0A1B0GW95;H7C0U1	IWS1_HUMAN	IWS1	Protein IWS1 homolog	23.9382	24.1178	23.9897	25.9076	25.9647	26.1256
+	2.34652	-0.540165	Q96ST3	Q96ST3	SIN3A_HUMAN	SIN3A	Paired amphipathic helix protein Sin3a	18.8224	19.1105	18.878	19.5028	19.5145	19.4141
+	1.96803	-0.716497	Q99543	Q99543;H7C3L7;Q99543-2;F2Z3H0;F2Z3N9	DNJC2_HUMAN	DNAJC2	DnaJ homolog subfamily C member 2	20.784	21.1854	21.2552	21.7179	21.9124	21.7439
+	3.68307	-0.504316	Q99613	Q99613;B5ME19;Q99613-2;H3BPE3	EIF3C_HUMAN	EIF3C	Eukaryotic translation initiation factor 3 subunit C	26.5035	26.6167	26.5046	27.0525	27.0604	27.0249
+	3.7782	0.29255	Q9BQ67	Q9BQ67;M0QX71	GRWD1_HUMAN	GRWD1	Glutamate-rich WD repeat-containing protein 1	22.6152	22.6095	22.6433	22.3674	22.3085	22.3144
+	3.67011	-0.732344	Q9BQA1	Q9BQA1;Q9BQA1-2	MEP50_HUMAN	WDR77	Methylosome protein 50	24.9908	24.8154	24.9578	25.6239	25.6475	25.6895
+	3.13224	-2.75855	Q9BRQ8	Q9BRQ8;Q9BRQ8-2	FSP1_HUMAN	AIFM2	Ferroptosis suppressor protein 1	14.8395	14.5661	15.278	18.0395	17.6078	17.312
+	6.013	-1.06421	Q9BRS2	Q9BRS2;E9PFQ8	RIOK1_HUMAN	RIOK1	Serine/threonine-protein kinase RIO1	24.1871	24.1629	24.1287	25.2143	25.2495	25.2075
+	1.55013	-3.51024	Q9BSF4	Q9BSF4	TIM29_HUMAN	TIMM29	Mitochondrial import inner membrane translocase subunit Tim29	14.5571	13.8969	17.2327	18.3729	19.1314	18.7131
+	2.15224	-0.462955	Q9BTD8;Q9BTD8-2;Q9BTD8-3;Q9BTD8-4	Q9BTD8;K7EML2;K7EQ03;K7EP90;K7ER08;Q9BTD8-2;Q9BTD8-3;Q9BTD8-4	RBM42_HUMAN	RBM42	RNA-binding protein 42	19.5374	19.7458	19.7688	20.2337	20.158	20.0492
+	3.73608	-4.71538	Q9BTV4	Q9BTV4	TMM43_HUMAN	TMEM43	Transmembrane protein 43	15.7221	16.9258	16.1955	21.0967	20.9206	20.9722
+	2.64151	-0.478356	Q9BVI4	Q9BVI4;F5H303	NOC4L_HUMAN	NOC4L	Nucleolar complex protein 4 homolog	21.2922	21.1771	21.0603	21.6839	21.6249	21.6558
+	5.50313	-1.44331	Q9BVS4	Q9BVS4;Q9BVS4-2;H0Y8R4;H0Y919	RIOK2_HUMAN	RIOK2	Serine/threonine-protein kinase RIO2	21.6122	21.5837	21.6646	23.0537	23.0156	23.121
+	2.21415	-0.472843	Q9BW19	Q9BW19	KIFC1_HUMAN	KIFC1	Kinesin-like protein KIFC1	18.616	18.8979	18.7441	19.1588	19.2847	19.2329
+	2.5894	-0.701432	Q9BXP5;Q9BXP5-2;Q9BXP5-3;Q9BXP5-4	Q9BXP5;Q9BXP5-2;Q9BXP5-3;Q9BXP5-4	SRRT_HUMAN	SRRT	Serrate RNA effector molecule homolog	20.8868	21.2296	21.016	21.7433	21.8001	21.6933
+	2.26492	-0.627884	Q9BY44	Q9BY44;F8WAE5;Q9BY44-2;Q9BY44-3;Q9BY44-4;H7C5R5	EIF2A_HUMAN	EIF2A	Eukaryotic translation initiation factor 2A	21.9357	22.1803	22.2796	22.6818	22.859	22.7385
+	2.40055	-0.702112	Q9BYN8	Q9BYN8	RT26_HUMAN	MRPS26	28S ribosomal protein S26, mitochondrial	21.326	21.5887	21.2669	21.9888	22.2101	22.0892
+	2.56886	-0.950555	Q9GZP8	Q9GZP8;Q9GZP8-2;K7EQZ3	IMUP_HUMAN	IMUP	Immortalization up-regulated protein	19.633	19.9668	19.569	20.5437	20.7981	20.6786
+	1.38809	-1.3313	Q9H0E3;Q9H0E3-3	Q9H0E3;A0A2R8YDB8;H7BXF5;Q9H0E3-3	SP130_HUMAN	SAP130	Histone deacetylase complex subunit SAP130	17.1868	17.7659	16.2529	18.4373	18.5101	18.2521
+	1.39978	-2.00915	Q9H0U4	Q92928;Q9H0U4;P62820;E9PLD0;E7END7;P62820-2	RAB1B_HUMAN	RAB1B	Ras-related protein Rab-1B	15.0659	16.9932	15.4915	17.2478	18.3585	17.9718
+	2.74343	-0.47466	Q9H1A4	Q9H1A4;A0A2R8YF63;H0Y564	APC1_HUMAN	ANAPC1	Anaphase-promoting complex subunit 1	19.461	19.6377	19.5765	19.9631	20.0948	20.0413
+	5.54019	-0.989526	Q9H1I8	Q9H1I8;B1AH59	ASCC2_HUMAN	ASCC2	Activating signal cointegrator 1 complex subunit 2	23.7119	23.7843	23.7394	24.7577	24.7409	24.7057
+	2.28241	-1.55843	Q9H223	Q9H223	EHD4_HUMAN	EHD4	EH domain-containing protein 4	15.244	15.5461	15.8139	16.761	17.5313	16.9869
+	2.7658	-0.433794	Q9H4H8	Q9H4H8;Q9H4H8-2;A0A087WXK8	FA83D_HUMAN	FAM83D	Protein FAM83D	19.1634	19.0392	19.1254	19.5114	19.6318	19.4861
+	2.3039	-0.440833	Q9H5H4	Q9H5H4;H3BS42	ZN768_HUMAN	ZNF768	Zinc finger protein 768	19.6294	19.6005	19.7177	19.985	20.2234	20.0617
+	3.28142	-0.516504	Q9H6R4;Q9H6R4-4	Q9H6R4;Q9H6R4-2;Q9H6R4-4;A0A0A0MRW6	NOL6_HUMAN	NOL6	Nucleolar protein 6	22.18	22.1524	22.0201	22.6317	22.6553	22.615
+	2.41057	-0.51568	Q9H7D0	Q9H7D0	DOCK5_HUMAN	DOCK5	Dedicator of cytokinesis protein 5	19.8698	20.1006	20.0156	20.4772	20.6156	20.4403
+	2.32485	-0.678923	Q9H7D7	Q9H7D7;Q9H7D7-2;A0A7P0SXD0;H0Y9R3;A0A499FIZ0;A0A7I2YQL3	WDR26_HUMAN	WDR26	WD repeat-containing protein 26	17.9484	17.7492	17.9243	18.402	18.7463	18.5104
+	2.41267	-0.540946	Q9HAU5	Q9HAU5	RENT2_HUMAN	UPF2	Regulator of nonsense transcripts 2	19.553	19.5738	19.6757	19.9872	20.265	20.1731
+	1.73489	-0.803008	Q9HCG8	Q9HCG8	CWC22_HUMAN	CWC22	Pre-mRNA-splicing factor CWC22 homolog	18.5873	19.2085	18.6171	19.7122	19.5547	19.5551
+	1.92351	0.640153	Q9NQT4	Q9NQT4;M0R102;M0R050	EXOS5_HUMAN	EXOSC5	Exosome complex component RRP46	21.0674	21.1549	21.5384	20.6556	20.5805	20.604
+	2.84834	-1.43328	Q9NRM2	Q9NRM2;C9J3B6;F8WBE4;C9JH62;G5E9M4	ZN277_HUMAN	ZNF277	Zinc finger protein 277	21.9901	21.7235	21.3974	23.0691	23.0798	23.2619
+	2.17288	0.72248	Q9NRW3	Q9NRW3	ABC3C_HUMAN	APOBEC3C	DNA dC->dU-editing enzyme APOBEC-3C	21.1953	20.784	21.1335	20.2771	20.2414	20.427
+	4.9844	-1.44163	Q9NRX1	Q9NRX1	PNO1_HUMAN	PNO1	RNA-binding protein PNO1	23.9973	24.0222	23.9469	25.4898	25.3366	25.4649
+	2.96266	-0.569586	Q9NRX2	Q9NRX2;E9PKV2	RM17_HUMAN	MRPL17	39S ribosomal protein L17, mitochondrial	19.0619	19.1831	19.2905	19.7192	19.7576	19.7675
+	5.59958	-0.539316	Q9NSI2;Q9NSI2-2	Q9NSI2;C9JJU7;Q9NSI2-2	SLX9_HUMAN	SLX9	Ribosome biogenesis protein SLX9 homolog	23.3184	23.3282	23.3609	23.8766	23.8661	23.8827
+	1.80764	-1.08891	Q9NSK0;Q9NSK0-3	Q9NSK0;C9J8T5;C9JZE5;Q9NSK0-3;Q9NSK0-4;Q9NSK0-5	KLC4_HUMAN	KLC4	Kinesin light chain 4	15.1901	15.5907	15.5288	16.7952	16.732	16.0491
+	2.02174	-0.602537	Q9NTI5;Q9NTI5-2	Q9NTI5;Q9NTI5-2;Q9NTI5-3	PDS5B_HUMAN	PDS5B	Sister chromatid cohesion protein PDS5 homolog B	20.2282	20.6067	20.6087	21.037	21.1238	21.0904
+	1.33418	-3.6841	Q9NTW7-4;Q9NTW7-5;Q9NTW7-6	Q9NTW7;Q9NTW7-3;Q9NTW7-4;Q9NTW7-5;Q9NTW7-6	ZF64B_HUMAN	ZFP64	Isoform of Q9NTW7, Isoform 6 of Zinc finger protein 64	18.7134	14.4297	15.5054	20.1094	19.7041	19.8872
+	2.03919	-0.506202	Q9NUQ3	Q9NUQ3	TXLNG_HUMAN	TXLNG	Gamma-taxilin	20.8619	21.114	21.1916	21.5001	21.5502	21.6359
+	2.25175	-0.459844	Q9NVA2	Q9NVA2;Q14141;Q92599;A6NFQ9;D6RER5;Q92599-2;Q92599-3;Q92599-4;D6RGI3;Q9NVA2-2;D6RDU5;F8W8I8;H0Y961;A6NMH6;Q14141-2;Q14141-4;B1AMS2;A0A087X142	SEP11_HUMAN	SEPTIN11	Septin-11	21.5579	21.7913	21.7868	22.1317	22.2423	22.1416
+	2.04111	-0.763099	Q9NVM6	Q9NVM6	DJC17_HUMAN	DNAJC17	DnaJ homolog subfamily C member 17	17.3844	17.8671	17.663	18.2605	18.5385	18.4049
+	2.09023	-0.485988	Q9NXN4;Q9NXN4-2	Q9NXN4;Q9NXN4-2	GDAP2_HUMAN	GDAP2	Ganglioside-induced differentiation-associated protein 2	15.8163	15.5696	15.697	16.1149	16.3191	16.1069
+	2.30108	-0.438588	Q9P015	Q9P015;E5RIZ4	RM15_HUMAN	MRPL15	39S ribosomal protein L15, mitochondrial	20.273	20.3982	20.154	20.6535	20.7158	20.7718
+	2.44597	-0.72619	Q9P258	Q9P258	RCC2_HUMAN	RCC2	Protein RCC2	22.5153	22.912	22.7009	23.4452	23.4818	23.3798
+	3.52018	-0.403632	Q9P2D1	Q9P2D1;A0A8Q3WKT9	CHD7_HUMAN	CHD7	Chromodomain-helicase-DNA-binding protein 7	19.6946	19.6812	19.6762	20.0286	20.0881	20.1463
+	3.39855	-0.553587	Q9UBK9;Q9UBK9-2	Q9UBK9;Q9UBK9-2;S4R2Z4	UXT_HUMAN	UXT	Protein UXT	18.4258	18.4475	18.5274	19.0292	19.0853	18.9469
+	2.37788	-0.41774	Q9UBQ5	Q9UBQ5;K7ES31;K7ERF1;Q9UBQ5-2	EIF3K_HUMAN	EIF3K	Eukaryotic translation initiation factor 3 subunit K	26.2113	26.1049	26.0298	26.4764	26.4947	26.628
+	2.14209	-1.54742	Q9UBR2	Q9UBR2;A0A7P0T9G9;A0A7P0T9U1;A0A7P0T8I6;A0A7P0T926;A0A7P0T900;A0A7P0T8X2;A0A7P0T989;A0A7P0TAT6;A0A7P0TBB5;A0A7P0TBM7;A0A7P0TAD4;A0A7P0TB41;A0A7P0TA25;A0A7P0Z4R9;A0A7P0Z469	CATZ_HUMAN	CTSZ	Cathepsin Z	17.8517	18.2327	18.8954	19.8193	19.8984	19.9044
+	2.1456	-1.14861	Q9UBS0	Q9UBS0	KS6B2_HUMAN	RPS6KB2	Ribosomal protein S6 kinase beta-2	17.7346	18.2656	17.5851	18.8576	19.1806	18.993
+	3.85929	-0.664981	Q9UGM6	Q9UGM6	SYWM_HUMAN	WARS2	Tryptophan--tRNA ligase, mitochondrial	18.7698	18.7824	18.6942	19.3649	19.4873	19.3892
+	2.64578	-0.809967	Q9UHB7	Q9UHB7;C9JCE0;Q9UHB7-2;Q9UHB7-3	AFF4_HUMAN	AFF4	AF4/FMR2 family member 4	19.3771	19.1241	19.5183	20.1397	20.1254	20.1843
+	2.78454	-0.519	Q9UHR4	Q9UHR4	BI2L1_HUMAN	BAIAP2L1	Brain-specific angiogenesis inhibitor 1-associated protein 2-like protein 1	20.3947	20.6047	20.4164	20.9585	21.0101	21.0041
+	2.45548	-0.578469	Q9UJX2	Q9UJX2;Q9UJX2-3	CDC23_HUMAN	CDC23	Cell division cycle protein 23 homolog	18.6628	18.8057	18.9686	19.4496	19.3807	19.3422
+	3.085	-0.658524	Q9UJX3;Q9UJX3-2	Q9UJX3;Q9UJX3-2	APC7_HUMAN	ANAPC7	Anaphase-promoting complex subunit 7	19.5426	19.6701	19.7693	20.272	20.3072	20.3784
+	2.01335	-0.565905	Q9UJX4	Q9UJX4;H0YFB5;Q9UJX4-3;F5H0F9;F5H0N1	APC5_HUMAN	ANAPC5	Anaphase-promoting complex subunit 5	18.4163	18.5499	18.2286	18.9762	18.8226	19.0936
+	2.00719	-0.608327	Q9UK53;Q9UK53-2;Q9UK53-3;Q9UK53-4;Q9UK53-5	Q9UK53;Q9UK53-2;Q9UK53-3;Q9UK53-4;Q9UK53-5;A0A087WXF7;A0A0C4DFW2	ING1_HUMAN	ING1	Inhibitor of growth protein 1	17.1524	17.4157	17.6033	17.987	18.0261	17.9834
+	2.8539	-0.79219	Q9UKM9;Q9UKM9-2	Q9UKM9;Q9UKM9-2;Q5QPL9;Q5QPM0;Q5QPM1	RALY_HUMAN	RALY	RNA-binding protein Raly	22.572	22.7523	22.7649	23.4671	23.3641	23.6346
+	2.40889	-0.489888	Q9UL54	Q9UL54;Q9UL54-3;Q9UL54-4	TAOK2_HUMAN	TAOK2	Serine/threonine-protein kinase TAO2	18.6613	18.5012	18.5354	19.1284	18.9247	19.1144
+	4.0103	-1.48516	Q9ULX3	Q9ULX3	NOB1_HUMAN	NOB1	RNA-binding protein NOB1	23.3287	23.5355	23.2354	24.8856	24.7836	24.8858
+	1.30777	-1.81565	Q9UPW5;Q9UPW5-2;Q9UPW5-3	Q9UPW5;J3KNS1;Q9UPW5-2;Q9UPW5-3	CBPC1_HUMAN	AGTPBP1	Cytosolic carboxypeptidase 1	15.3859	17.4889	15.8526	17.8466	18.038	18.2897
+	1.73593	-0.741977	Q9UQ13	Q9UQ13;A0A8I5QJS4;Q9UQ13-2;A0A8I5KUQ6;A0A8I5KUD9	SHOC2_HUMAN	SHOC2	Leucine-rich repeat protein SHOC-2	18.9218	19.347	19.5068	20.0112	20.1371	19.8532
+	2.6167	-0.625099	Q9UQB8;Q9UQB8-2	Q9UQB8;Q9UQB8-3;Q9UQB8-4;Q9UQB8-5;Q9UQB8-6;Q9UQB8-2;I3L526;I3L4C2;I3L327;I3L2M4;I3L1C8;I3L113;I3L125;I3L0M4	BAIP2_HUMAN	BAIAP2	Brain-specific angiogenesis inhibitor 1-associated protein 2	19.8923	20.131	20.18	20.6971	20.7295	20.652
+	2.56311	-0.439786	Q9Y262	Q9Y262;B0QY89;B0QY90;Q9Y262-2	EIF3L_HUMAN	EIF3L	Eukaryotic translation initiation factor 3 subunit L	25.7692	25.6148	25.7581	26.099	26.1207	26.2418
+	2.96522	-5.72636	Q9Y291	Q9Y291;C9JBY7	RT33_HUMAN	MRPS33	28S ribosomal protein S33, mitochondrial	14.8418	14.1919	16.4363	20.8223	20.6961	21.1307
+	2.27681	-0.540554	Q9Y2A7;Q9Y2A7-2	Q9Y2A7;Q9Y2A7-2	NCKP1_HUMAN	NCKAP1	Nck-associated protein 1	20.3142	20.5484	20.3044	20.8922	21.0416	20.8548
+	2.51554	-0.654311	Q9Y2Q9	Q9Y2Q9;H0YAT2;H7C5V3;H0YC42	RT28_HUMAN	MRPS28	28S ribosomal protein S28, mitochondrial	20.628	20.3945	20.7023	21.2072	21.312	21.1686
+	2.83069	-1.12046	Q9Y2R9	Q9Y2R9;J3QKW2;J3QLS3	RT07_HUMAN	MRPS7	28S ribosomal protein S7, mitochondrial	20.7186	20.661	20.2887	21.6998	21.5784	21.7514
+	2.19352	-0.712236	Q9Y2T2	Q9Y2T2	AP3M1_HUMAN	AP3M1	AP-3 complex subunit mu-1	21.5238	21.6234	21.1741	22.1465	22.1523	22.1592
+	2.16168	-0.454999	Q9Y2X7	Q9Y2X7;Q9Y2X7-3;J3QLH1;J3QRU8;A0A0C4DGN6	GIT1_HUMAN	GIT1	ARF GTPase-activating protein GIT1	19.6441	19.8584	19.8291	20.1712	20.3487	20.1766
+	3.16216	-0.849697	Q9Y399	Q9Y399	RT02_HUMAN	MRPS2	28S ribosomal protein S2, mitochondrial	21.3687	21.6142	21.4244	22.3119	22.2359	22.4085
[truncated: 3,934 more rows]

## Sheet: acFYN_FYN
Significant	-LOG(P-value)	Difference	Protein.Group	Protein.Ids	Protein.Names	Genes	First.Protein.Description	Ac-FYN .1	Ac-FYN .2	Ac-FYN .3	FYN .1	FYN .2	FYN .3
[truncated: 4,241 more rows]

[truncated: 2 more sheets: myrLYN_acLYN, acTHOC7_THOC7]
