# Supplementary material for: CUL4A-DDB1-DCAF10 is an N-recognin for N-terminally acetylated Src kinases
Source: Research Square preprint supplement (doi:10.21203/rs.3.rs-6184818/v1), 2025-04-01
Supplement: Supplementary file 3 [file a112eb8a651e7aea2313b541.xlsx]

## Sheet: Lyn_parental_KOs
Protein.Names	Genes	DLD1_Clone1	DLD1_Clone12	DLD1_Clone13	DLD1_parental
LYN_HUMAN	LYN				7060000
A0A024R4E5_HUMAN;C9J5E5_HUMAN;C9JBS3_HUMAN;C9JEJ8_HUMAN;C9JES8_HUMAN;C9JHN6_HUMAN;C9JHS7_HUMAN;C9JHZ8_HUMAN;C9JIZ1_HUMAN;C9JK79_HUMAN;C9JT62_HUMAN;C9JZI8_HUMAN	HDLBP	16800000	20900000	16200000	15600000
A0A075B7C0_HUMAN	CAPNS1	135702	108880	204769	175557
A0A087WVM4_HUMAN;B7ZM99_HUMAN;H0Y327_HUMAN	MTHFD1L	9440000	3730000	6080000	5790000
A0A087WWI0_HUMAN	LRMDA	232343	755388	1280000	761442
A0A087WZ13_HUMAN	RAVER1	3070000	3060000	4280000	2520000
A0A096LP07_HUMAN;A0A096LPJ3_HUMAN;A8K070_HUMAN	GPS1	4140000	3520000	3610000	3850000
A0A096LP25_HUMAN	AAK1	40800000	41400000	61600000	45700000
A0A096LP69_HUMAN	CD99	3280000	3560000	6320000	5000000
A0A0A0MR33_HUMAN;A0A0C4DFM0_HUMAN;G3V4T6_HUMAN;G3V5T0_HUMAN	GSTZ1	16400000	14600000	15900000	16200000
A0A0A0MSA9_HUMAN;A0A0C4DG49_HUMAN	PVR	376151			673338
GAL3A_HUMAN;GAL3B_HUMAN	GATD3;GATD3B	39200000	53600000	53600000	54200000
A0A0C4DGB9_HUMAN	PPA2	4960000	4640000	7740000	4970000
A0A0C4DH22_HUMAN;A0A1B0GTW6_HUMAN;H7C2K6_HUMAN	EPB41L1	492059	678564	1500000	1710000
A0A0G2JH50_HUMAN;A0A0G2JIF0_HUMAN;A0A1W2PS56_HUMAN;A2BF26_HUMAN;Q5RIP0_HUMAN	HLA-C	4530000	4840000	2410000	4180000
A0A0J9YWL0_HUMAN	CRYBG1	7360000	11200000	14300000	9850000
A0A0J9YXF2_HUMAN	PON2	17800000	26100000	29200000	24900000
A0A0S2Z377_HUMAN;E5RK69_HUMAN	ANXA6	1810000	1840000	4690000	2250000
A0A0U1RQK7_HUMAN;A0A8I5KT99_HUMAN;A0A8I5KV92_HUMAN	EIF4G3	3090000	3400000	1650000	2130000
NBDY_HUMAN	NBDY	13700000	19900000	18500000	16300000
A0A140T913_HUMAN;A0A140T9I0_HUMAN;A0A140T9X5_HUMAN;Q53Z42_HUMAN	HLA-A	20200000	17500000	17900000	14400000
A0A1B0GTL5_HUMAN	RAB11FIP5	2030000	3850000	4690000	2990000
A0A1B0GV68_HUMAN	FARP1	891395	1740000	2010000	1140000
A0A1B0GW03_HUMAN	PLEKHA6	914242	488625	1470000	1110000
A0A1B0GW05_HUMAN	DPY19L1	1500000	1390000	1960000	853007
A0A1C7CYX9_HUMAN	DPYSL2	3470000	5520000		3640000
A0A1W2PS58_HUMAN;K7EPI4_HUMAN	GFAP	21100000	30400000	54100000	30700000
A0A2R8Y4Z8_HUMAN	CCDC9	3910000	4920000	5450000	4920000
A0A2R8Y5A6_HUMAN;A0A2R8YDM9_HUMAN;A0A2R8YGV1_HUMAN	ATXN2	2780000	3200000	2540000	1660000
A0A2R8Y6A3_HUMAN	TPM2	41377.6		39236.8	40161.2
A0A2R8Y6F8_HUMAN;A0A2U3TZN6_HUMAN	CASK	2090000	3210000	3280000	3160000
A0A2R8Y783_HUMAN	EPB41	708149	1080000	1280000
A0A2R8YEA7_HUMAN	ACTB		347877	297622	617098
A0A2R8YF49_HUMAN	ARHGEF5	701532	717557	923682	528512
A0A2R8YFJ4_HUMAN;A0A994J4S5_HUMAN;F2Z2U4_HUMAN;H0Y4W2_HUMAN	TRRAP	2320000	2110000	1260000	1450000
A0A3B3ISV4_HUMAN	VKORC1L1	570340	292559	514693	506291
A0A3B3IUB9_HUMAN;A0A8V8TQB4_HUMAN;A0A8V8TR92_HUMAN	BIRC6	13700000	15000000	13600000	12500000
A0A494BZV2_HUMAN;H0Y2S9_HUMAN	MPRIP	2090000	4190000	4290000	4470000
A0A494C0R8_HUMAN;I3L2B0_HUMAN	CLUH	17400000	14400000	12500000	11500000
A0A494C0S0_HUMAN	SNX25		9360000		3870000
A0A499FI48_HUMAN;C9JMN9_HUMAN	PDIA4	5530000	6260000	9150000	8470000
A0A499FIZ0_HUMAN;A0A7I2V3I7_HUMAN;A0A7I2YQQ9_HUMAN	WDR26	6400000	10100000	5230000	4980000
A0A4W8VX11_HUMAN;A0A5H1ZRS1_HUMAN;E7EV93_HUMAN;E9PGW9_HUMAN;H0YBA1_HUMAN	PCM1	1020000	631253	1340000	1050000
A0A5F9YFS9_HUMAN	SPCS1	845761	586927	994686	700958
A0A5F9ZH05_HUMAN	ALDH5A1		1540000	738928	1560000
A0A6Q8PFE4_HUMAN	ACTB	1680000	1850000	2910000	1520000
A0A6Q8PFF6_HUMAN;A0A6Q8PGN6_HUMAN;E7EVY3_HUMAN;H0Y9H6_HUMAN;H0YD33_HUMAN	CAST	1810000	3730000	2850000	3430000
A0A6Q8PFL0_HUMAN	CAST	21300000	30800000	32400000	32600000
A0A6Q8PH82_HUMAN	PTBP2		594161	329722	996360
A0A7I2V2N6_HUMAN	NDUFA10		17200000	14900000
A0A7I2V490_HUMAN;A0A7I2V5F1_HUMAN	DNMT1	1070000	663058		526795
A0A7I2YQ88_HUMAN	PABPC1	5620000	5350000	2130000	4590000
A0A7I2YQV8_HUMAN	SYNCRIP	6590000	8050000	8730000	6570000
A0A7P0T9K5_HUMAN;I3L2J0_HUMAN	CIC	2200000	2040000	1590000	1570000
A0A804CD06_HUMAN;Q5T949_HUMAN	PTPA	2190000	1520000	1610000	2310000
A0A804F6T5_HUMAN;A0A804F729_HUMAN;A0A8V8TNX9_HUMAN	PKM	5970000	6750000	7520000	8940000
A0A804HJN7_HUMAN;A0A804HL31_HUMAN;G3V2E8_HUMAN;G3V2W4_HUMAN;G3V2X9_HUMAN;H9KV75_HUMAN	ACTN1	11500000	8930000	10600000	4160000
A0A804HKC3_HUMAN	PRRC2B	1680000	1030000	1390000	1580000
A0A804HKE7_HUMAN;E7EVA0_HUMAN	MAP4	901288	853244		1040000
A0A804HKR5_HUMAN;A0A804HKX0_HUMAN	LRPPRC	2140000	957284	876234	1140000
A0A8I5KPG1_HUMAN	SEC16A	5940000	6960000	5010000	5450000
A0A8I5KX85_HUMAN	CDV3	3060000	3430000	3430000	3670000
A0A8Q3WL95_HUMAN;E7EM57_HUMAN;E7EUI8_HUMAN	G6PD	5240000	3350000	6380000	8910000
A0A8V8TMN4_HUMAN;H0Y9S9_HUMAN;K7ENU7_HUMAN	PPIP5K2	5620000	6890000	5460000	7210000
A0A8V8TMQ1_HUMAN;A0A8V8TNP6_HUMAN	FXR1	5890000	7710000	6940000	4560000
A0A8V8TN03_HUMAN	NBPF8	1610000	2270000	1610000	1930000
A0A8V8TQI2_HUMAN;A0A8V8TR31_HUMAN	OS9	12100000	12500000	13100000	9700000
A0A994J3S8_HUMAN	GLS	12300000	7530000	12000000	7260000
A0A994J434_HUMAN	HMGA1	3740000	2210000	4430000	3120000
A0A994J4R6_HUMAN;A0A994J6S4_HUMAN	USP9X	3830000	5190000	3720000	4690000
A0A994J4Y3_HUMAN;A0A994J7H1_HUMAN;A0A994J7V4_HUMAN	SRRM1	1840000	2640000	1470000	1690000
A0A994J508_HUMAN	VASP	1150000	1370000	1180000	1230000
A0A994J537_HUMAN;C9JHU5_HUMAN;C9JUW5_HUMAN;E9PCX8_HUMAN	TNS3	582616	673008	416435	713188
A0A994J7H4_HUMAN	NPLOC4	9720000	7720000	6880000	8840000
A0A994J7P9_HUMAN	FXR2	1730000	1460000	1210000	925189
A0A994J7X3_HUMAN	VASP				2520000
RBM47_HUMAN	RBM47	19000000	27700000	22200000	25200000
IFT56_HUMAN	IFT56		2980000	2120000	1560000
UBA6_HUMAN	UBA6	56700000	57100000	61300000	61300000
ESYT2_HUMAN	ESYT2	60100000	72400000	90800000	67400000
BLT3B_HUMAN	BLTP3B	392859	1490000		1250000
SHOT1_HUMAN	SHTN1	52300000	80000000	71100000	72800000
RHG10_HUMAN	ARHGAP10	8950000	3850000	8180000	7510000
HACL2_HUMAN	ILVBL	18200000	18300000	18000000	15800000
CA226_HUMAN	C1orf226	17800000	7280000	14500000	12000000
NDUF8_HUMAN	NDUFAF8	2110000	1480000	2200000	3270000
PKHG3_HUMAN	PLEKHG3	7870000	7260000	10300000	11400000
SPD2B_HUMAN	SH3PXD2B	5960000	6180000	7780000	5960000
NBAS_HUMAN	NBAS	5810000	4830000	5880000	4640000
SYTC2_HUMAN	TARS3		1760000	2720000	978847
TYW5_HUMAN	TYW5	4300000	7240000	6740000	5470000
C144A_HUMAN;C144C_HUMAN	CCDC144A;CCDC144CP			9190000	16800000
DEND3_HUMAN	DENND3	6520000	3430000	8530000	7130000
T131L_HUMAN	TMEM131L	217499	447520
VWA8_HUMAN	VWA8	76000000	72000000	84000000	77900000
SBNO1_HUMAN	SBNO1	6740000	6140000	6140000	5270000
PRA18_HUMAN;PRA19_HUMAN;PRA22_HUMAN	PRAMEF18;PRAMEF19;PRAMEF22			9650000	8080000
GTPBA_HUMAN	GTPBP10	10500000	9570000	9270000	9060000
WDR91_HUMAN	WDR91	4200000	5110000	4400000	5080000
RAB19_HUMAN	RAB19	7890000	8520000	6980000	6130000
XIRP2_HUMAN	XIRP2	42700000	30000000	64500000
POTEF_HUMAN	POTEF	312000000	495000000	682000000	753000000
VP37C_HUMAN	VPS37C	3770000	6350000	5550000	6880000
TPC13_HUMAN	TRAPPC13		5720000	4580000	5820000
CNOT1_HUMAN	CNOT1	38400000	37700000	36700000	35200000
MLP3B_HUMAN;MP3B2_HUMAN	MAP1LC3B;MAP1LC3B2	3450000			6580000
CB072_HUMAN	C2orf72	1720000	2570000	3660000	2430000
FA83G_HUMAN	FAM83G	2520000	1770000	2080000	2030000
PALM3_HUMAN	PALM3		5050000	13700000	4080000
PGP_HUMAN	PGP	80600000	85600000	79100000	98000000
RIMC1_HUMAN	RIMOC1	17600000	20600000	20200000	15100000
RCCD1_HUMAN	RCCD1	4390000	5450000	5340000	3310000
ZN316_HUMAN	ZNF316			497596	486186
TBAL3_HUMAN	TUBAL3	13100000	8080000	5660000	8810000
SMHD1_HUMAN	SMCHD1	63900000	61400000	53000000	46200000
CAST2_HUMAN	CASTOR2	23500000	22400000	21200000	25900000
CC154_HUMAN	CCDC154		3030000	3720000
U119B_HUMAN	UNC119B	21400000	19500000	28800000	19500000
RAP1B_HUMAN;RP1BL_HUMAN	RAP1B;RAP1BL	11600000	14600000	15900000	13900000
MET15_HUMAN	METTL15	2620000	2460000	1660000	2040000
CC85C_HUMAN	CCDC85C	2040000	1400000	2100000	1720000
RGPD3_HUMAN;RGPD4_HUMAN	RGPD3;RGPD4	19000000	18900000	16200000	16900000
AXA2L_HUMAN	ANXA2P2	5640000	4880000	8630000	6390000
RTL8C_HUMAN	RTL8C
ZSWM8_HUMAN	ZSWIM8	3140000	3450000	3110000	2620000
MYH7B_HUMAN	MYH7B	6890000		5340000	8480000
RHG32_HUMAN	ARHGAP32	7520000	16200000	15800000	12600000
A8K7Q2_HUMAN	HSPA8	14400000	13700000	17400000	10900000
A8MQ02_HUMAN;E9PFY5_HUMAN;F8W9I4_HUMAN	AFDN	328939	317647	564154	678401
CENPX_HUMAN	CENPX	3860000	2800000	2180000	1810000
F1712_HUMAN	FAM171A2
RUXGL_HUMAN;RUXG_HUMAN	SNRPG;SNRPGP15	241000000	195000000	155000000	183000000
NUD19_HUMAN	NUDT19	48500000	78100000	74100000	85500000
IMA8_HUMAN	KPNA7	25800000	27000000	28800000	27600000
MI4GD_HUMAN	MIF4GD	5380000	5870000	5970000	6360000
MYO9A_HUMAN	MYO9A	563028			569118
IQIP1_HUMAN;SCHI1_HUMAN	IQCJ-SCHIP1;SCHIP1
B4DQA8_HUMAN;E9PCW1_HUMAN	GOSR1	1190000	1180000	1220000	804801
B4DT23_HUMAN	FAM98A	2250000	774287	6480000	7080000
B7Z493_HUMAN;E9PJX4_HUMAN;F8VWL3_HUMAN	FGD4		12200000	7550000
GPHRA_HUMAN;GPHRB_HUMAN	GPR89A;GPR89B	1510000	1420000	1510000
WASH2_HUMAN;WASH3_HUMAN	WASH2P;WASH3P	16500000	21300000	24200000	25100000
C9J5J3_HUMAN;C9JZU6_HUMAN;E7EQ69_HUMAN	NAA50	30000000	26300000	27900000	29900000
C9J6P4_HUMAN;H7C5K1_HUMAN	ZC3HAV1		156279	81918.7	84563
RAS4B_HUMAN;RASL2_HUMAN	RASA4;RASA4B
UMAD1_HUMAN	UMAD1	2910000	5040000	5040000	4090000
C9JBN1_HUMAN;C9JCK0_HUMAN;C9JLJ1_HUMAN	TBL1XR1	3000000	4370000	4370000	2530000
MCRI1_HUMAN	MCRIP1	6210000	6940000	5570000	5150000
C9JUM1_HUMAN	ACTB
E5RIH3_HUMAN	PSD3
E7EN55_HUMAN	LUC7L3	3740000	3780000	3650000
NACAM_HUMAN	NACA	457000000	387000000	393000000	353000000
E9PGM3_HUMAN;Q3ZCN8_HUMAN	DEPDC4		2820000
E9PJ88_HUMAN	NPIPA5	626805	332290	540274	443409
E9PLY5_HUMAN	MACF1	4860000	6050000	8540000	6850000
E9PMP7_HUMAN;F8WD26_HUMAN	LMO7	8020000	6540000	9330000	4600000
E9PMS6_HUMAN;H0YDG6_HUMAN	LMO7		916338	738361
E9PNE2_HUMAN	ALG8	35800000	15700000	29200000	39900000
CK098_HUMAN	C11orf98	17600000	15000000	16400000	20000000
F5GXV8_HUMAN;J3KPD3_HUMAN	RBM7	1010000	1670000	546384	1020000
F5H0E0_HUMAN	PPFIBP1		2020000	3140000	5450000
F8VRH0_HUMAN	PCBP2	1560000	1360000		2060000
F8VZX2_HUMAN;H3BRU6_HUMAN	PCBP2	52400000	42300000	48000000	47500000
G5EA36_HUMAN;I3L328_HUMAN	CDC27	3340000	3630000	3300000	2380000
H0Y337_HUMAN;Q5JT44_HUMAN;Q5JT49_HUMAN	UTRN	5450000	3760000	5940000
H0Y4F5_HUMAN;H0Y6T5_HUMAN;H3BPE1_HUMAN;H3BQK9_HUMAN	MACF1	3510000	4080000	6890000	5010000
H0Y6A0_HUMAN	ARFGAP3			607002
H0YCD7_HUMAN	OSBPL5	2460000	4060000	4350000	3110000
H0YD48_HUMAN;H0YE97_HUMAN;H0YEF7_HUMAN;H0YEH1_HUMAN;H0YEY8_HUMAN	PICALM	3930000	4840000	3620000	4270000
H0YDF6_HUMAN	NHSL1	5800000	4290000	4640000	3810000
H0YF36_HUMAN	NUP214	74500000	52400000	56000000	65400000
H3BVI4_HUMAN	LMF1	59600000	32600000	52800000	62100000
H7BY36_HUMAN	EWSR1	4700000	7000000	3810000	6840000
H7C0N4_HUMAN	SF1	3740000	4810000	2780000	2830000
H7C144_HUMAN	ACTN4
H7C2U0_HUMAN	CCT8	7950000	31300000	49800000	66100000
H7C3M7_HUMAN	FARP2	1310000	2220000	2150000	2180000
H7C4C8_HUMAN	CCT8	162000000	117000000	160000000	165000000
I3L1A8_HUMAN;I3L2T0_HUMAN;I3L437_HUMAN	ELP5	1260000	428850		796739
J3KND1_HUMAN	SAAL1	718173	517594	474334	495268
J3KS23_HUMAN	CBFB	8230000	19300000	23900000	22500000
K7EJE8_HUMAN;K7EKE6_HUMAN	LONP1	2000000	1220000	1540000
K7EM38_HUMAN	ACTG1	1940000	1600000	2010000	2150000
K7EMD9_HUMAN	KRT13	4320000	17200000	38900000	22000000
K7ENF0_HUMAN	NARS1	17600000	27000000	26200000	34200000
K7EPT8_HUMAN	GFAP	23100000	27000000	49100000	18100000
S35U4_HUMAN	SLC35A4	32700000	43000000	38300000	29700000
ASURF_HUMAN	ASDURF	16000000	17000000	14900000	16000000
MIDUO_HUMAN	MIEF1	14000000	9760000	6660000	6230000
M0QZM1_HUMAN	HNRNPM	76300000	66200000	86000000	69000000
M0R0K9_HUMAN	TRIM28	6150000	3780000		3820000
DNS2A_HUMAN	DNASE2	39400000	51100000	35300000	41700000
ADAS_HUMAN	AGPS	90100000	122000000	105000000	123000000
UBXN8_HUMAN	UBXN8	1970000	1330000	1740000
KIF2A_HUMAN	KIF2A	27900000	28300000	31500000	24800000
KIF2A_HUMAN	KIF2A	4750000	3600000		3310000
KITM_HUMAN	TK2	4750000	3910000	4160000	3760000
DX39A_HUMAN	DDX39A	44800000	37200000	30500000	36100000
PDLI1_HUMAN	PDLIM1	164000000	189000000	207000000	145000000
BACH_HUMAN	ACOT7	114000000	63600000	91000000	82200000
MYO1C_HUMAN	MYO1C	137000000	141000000	193000000	148000000
SNP23_HUMAN	SNAP23	18500000	16800000	20900000	21600000
HAX1_HUMAN	HAX1	15800000	11900000	13800000	15800000
AIP_HUMAN	AIP	61500000	40900000	40500000	47600000
GTPB1_HUMAN	GTPBP1	27200000	25400000	28800000	25600000
STXB3_HUMAN	STXBP3	31700000	43000000	46500000	50200000
AP4M1_HUMAN	AP4M1	3730000	4930000	4520000	3790000
ARVC_HUMAN	ARVCF	2190000	1330000	2570000	2420000
SMAP_HUMAN	SMAP	145000000	178000000	164000000	153000000
RB27B_HUMAN	RAB27B	8910000	11900000	13400000	12600000
AP3B1_HUMAN	AP3B1	71000000	67200000	55300000	75400000
ST2B1_HUMAN	SULT2B1	10100000	30800000	35600000	25700000
RHOD_HUMAN	RHOD	1750000	2050000	1810000	1810000
APBB1_HUMAN	APBB1
LEG8_HUMAN	LGALS8	9070000	9180000	7810000	9620000
NDUS8_HUMAN	NDUFS8	5860000	5130000	6020000	3960000
TR10A_HUMAN	TNFRSF10A	6670000	5150000	6570000	7960000
IKBE_HUMAN	NFKBIE	11400000	14900000	12600000	14400000
PSD11_HUMAN	PSMD11	206000000	201000000	188000000	214000000
PSD12_HUMAN	PSMD12	153000000	147000000	143000000	149000000
PSMD9_HUMAN	PSMD9	106000000	103000000	109000000	117000000
ATOX1_HUMAN	ATOX1	139000000	118000000	128000000	131000000
MEN1_HUMAN	MEN1	5350000	5810000	4950000	3930000
CBX4_HUMAN	CBX4	4380000	5520000	3630000	3300000
GET1_HUMAN	GET1	7640000	12200000	12100000	6820000
PGRC1_HUMAN	PGRMC1	121000000	115000000	129000000	85300000
SPT5H_HUMAN	SUPT5H	55900000	59000000	27900000	54700000
SPT5H_HUMAN	SUPT5H	4310000	3820000		2100000
TAF4_HUMAN	TAF4	4830000	4830000	3710000	4110000
DFFA_HUMAN	DFFA	69600000	56800000	63200000	72400000
RFXAP_HUMAN	RFXAP	427723	419261	383633	405209
HIP1_HUMAN	HIP1	12300000	9800000	8990000	6970000
CLIC1_HUMAN	CLIC1	297000000	571000000	636000000	611000000
EIF3F_HUMAN	EIF3F	161000000	129000000	136000000	156000000
WWP2_HUMAN	WWP2	1380000	2180000	1800000	1390000
BMAL1_HUMAN	BMAL1	2820000	2430000	1590000	1860000
PK3CD_HUMAN	PIK3CD	6690000	5040000	9550000	7660000
ODPX_HUMAN	PDHX	14200000	19700000	21000000	17400000
ST1C2_HUMAN	SULT1C2	5110000	2820000	9030000	8780000
QSOX1_HUMAN	QSOX1	2980000		3230000
DCTN6_HUMAN	DCTN6	9960000	14500000	16500000	13000000
ACATN_HUMAN	SLC33A1	1360000	563399	1680000	1140000
WASL_HUMAN	WASL	11700000	13600000	14900000	12900000
IPO5_HUMAN	IPO5	202000000	200000000	216000000	212000000
RPOM_HUMAN	POLRMT	4330000	2360000	1600000	1260000
EF2K_HUMAN	EEF2K	5510000	6340000	2120000	7100000
SAP18_HUMAN	SAP18	21300000	28300000	17600000	13900000
EMAL1_HUMAN	EML1
IF2B3_HUMAN	IGF2BP3	13400000	21700000	23600000	34500000
DNM1L_HUMAN	DNM1L	85400000	95400000	85000000	105000000
RTCA_HUMAN	RTCA	54500000	56000000	63000000	66400000
P3C2A_HUMAN	PIK3C2A	17700000	18700000	7450000	13800000
IFRD1_HUMAN	IFRD1	5370000	6970000	4970000	7630000
P85B_HUMAN	PIK3R2	7650000	8650000	7750000	8730000
GOLI4_HUMAN	GOLIM4	3770000	3850000	5010000	3250000
MANBA_HUMAN	MANBA	17900000	43100000	55400000	20400000
AGRIN_HUMAN	AGRN	47600000	95900000	75100000	62100000
PLOD2_HUMAN	PLOD2	24800000	17500000	14800000	11400000
MEIS1_HUMAN	MEIS1
EXOC5_HUMAN	EXOC5	16100000	16800000	18900000	20600000
HMGN4_HUMAN	HMGN4	3510000	4390000	3600000	4920000
NDUA4_HUMAN	NDUFA4	30800000	32700000	48700000	17600000
PSDE_HUMAN	PSMD14	202000000	175000000	191000000	217000000
ZN593_HUMAN	ZNF593	2610000	3140000	3430000	2400000
BIN1_HUMAN	BIN1	71400000	54700000	96300000	76100000
IMA4_HUMAN	KPNA3	60900000	48600000	55000000	57200000
STK25_HUMAN	STK25	2750000	2830000	2780000	3290000
LAD1_HUMAN	LAD1	34100000	46500000	48000000	37500000
KRIT1_HUMAN	KRIT1	4550000	4440000	4420000	3900000
PESC_HUMAN	PES1	11200000	10900000	8920000	8430000
SDCB1_HUMAN	SDCBP	31900000	16000000	16400000	22000000
PITM1_HUMAN	PITPNM1	1260000	1680000	2250000	1790000
MPP10_HUMAN	MPHOSPH10	7760000	7070000	5050000	6520000
NOP56_HUMAN	NOP56	13100000	16000000	10900000	10600000
DDX3X_HUMAN	DDX3X	183000000	151000000	186000000	174000000
RNT2_HUMAN	RNASET2	27200000	40400000	41400000	36900000
PODXL_HUMAN	PODXL	36900000	43800000	20100000	47800000
CCN1_HUMAN	CCN1	4340000
PIR_HUMAN	PIR	7930000	18000000	8240000	14600000
IMA3_HUMAN	KPNA4	87100000	75600000	84100000	105000000
TRI38_HUMAN	TRIM38	4580000	5600000	4410000	5590000
NFIB_HUMAN	NFIB	6000000	3020000	10700000
E2F3_HUMAN	E2F3		923937	484615	785246
PPP6_HUMAN	PPP6C	86800000	87100000	80300000	78500000
NDKM_HUMAN	NME4
EST2_HUMAN	CES2	1540000	2380000	2380000	2700000
P3C2B_HUMAN	PIK3C2B	3590000	5350000	4130000	4020000
MA2B1_HUMAN	MAN2B1	18900000	36100000	40900000	38200000
UBE2C_HUMAN	UBE2C	11700000	13600000	16400000	9550000
PDXK_HUMAN	PDXK	80100000	117000000	154000000	127000000
SCD_HUMAN	SCD	20000000	9900000	12200000	9220000
CLD4_HUMAN	CLDN4	3710000	7170000	8340000	4480000
ARI1A_HUMAN	ARID1A	16400000	17600000	12700000	10700000
CDKA1_HUMAN	CDK2AP1	10700000	12700000	7160000	6310000
TXND9_HUMAN	TXNDC9	19700000	24900000	27100000	21000000
DPYL4_HUMAN	DPYSL4
TRAD1_HUMAN	TRAFD1	2050000	1880000	2460000	2740000
ACPM_HUMAN	NDUFAB1	85200000	67700000	78900000	111000000
UBFD1_HUMAN	UBFD1	32700000	42100000	39500000	44300000
C56D2_HUMAN	CYB561D2	2460000	1240000	1780000	1630000
CTRO_HUMAN	CIT	11100000	14200000	12900000	7580000
COPE_HUMAN	COPE	117000000	134000000	129000000	126000000
RFXK_HUMAN	RFXANK	450982	242455	381893	289551
IF1AY_HUMAN	EIF1AY		23600000	20500000	22500000
BORG1_HUMAN	CDC42EP2	897840
AP3D1_HUMAN	AP3D1	35800000	37500000	31000000	39500000
CCS_HUMAN	CCS	18500000	16500000	20000000	20400000
ZN195_HUMAN	ZNF195	6810000	2090000		4880000
ABLM1_HUMAN	ABLIM1	14100000	25000000	24100000	21900000
DVL1_HUMAN	DVL1	329061		538979	377907
DVL2_HUMAN	DVL2	8840000	8870000	10200000	6950000
CHD1_HUMAN	CHD1	15200000	18000000		10700000
GOSR2_HUMAN	GOSR2	14100000	8090000	11000000	12200000
TOR1A_HUMAN	TOR1A	54000000	73000000	67100000	48000000
TOR1B_HUMAN	TOR1B	14200000	23100000	19800000	19200000
STX16_HUMAN	STX16	2690000	3510000	3460000	3000000
ADA10_HUMAN	ADAM10	21100000	32700000	19300000	31300000
EI24_HUMAN	EI24	12600000	18700000	15100000	8940000
ENC1_HUMAN	ENC1	1190000	2040000	842604	1220000
PTGES_HUMAN	PTGES	6480000	8680000	8880000	6810000
APAF_HUMAN	APAF1	10200000	9730000	6540000	8700000
RIOK3_HUMAN	RIOK3	15300000	9160000	11700000	17400000
IMPA2_HUMAN	IMPA2	6710000	5470000	4900000	4880000
MP2K7_HUMAN	MAP2K7	1860000	3690000	2250000	1840000
ACOT8_HUMAN	ACOT8	9160000	11900000	11800000	14000000
CDIPT_HUMAN	CDIPT	11800000	11100000	13900000	7190000
PDCD5_HUMAN	PDCD5	110000000	120000000	125000000	112000000
ANM5_HUMAN	PRMT5	116000000	114000000	117000000	134000000
NHRF1_HUMAN	NHERF1	137000000	117000000	120000000	132000000
CHK1_HUMAN	CHEK1	7570000	18300000	16500000	10300000
TR10B_HUMAN	TNFRSF10B	5790000	4360000	7490000	10000000
MEIS2_HUMAN	MEIS2
FPGT_HUMAN	FPGT		5280000	5260000	4710000
TPP1_HUMAN	TPP1	103000000	78200000	102000000	125000000
TCRG1_HUMAN	TCERG1	47100000	52000000	47200000	46000000
NDC80_HUMAN	NDC80	5490000	6250000	5870000	3160000
KIF3C_HUMAN	KIF3C
NRP1_HUMAN	NRP1	5940000	9010000	27900000	5500000
TNPO2_HUMAN	TNPO2	9010000	11300000	9800000	9330000
RPC1_HUMAN	POLR3A	7700000	9320000	6630000	6710000
CPLX1_HUMAN	CPLX1	7200000	4350000	3530000	5520000
TSN4_HUMAN	TSPAN4
PSA7_HUMAN	PSMA7	410000000	434000000	449000000	433000000
RGRF2_HUMAN	RASGRF2	1040000	824175	1380000	1290000
SCAM3_HUMAN	SCAMP3	34000000	36000000	37700000	27800000
OPLA_HUMAN	OPLAH	545948		645545	1310000
BACH1_HUMAN	BACH1	3090000	4650000		3790000
BCKD_HUMAN	BCKDK	11200000	7850000	8660000	8310000
IFIT3_HUMAN	IFIT3	2030000		5030000
MGST3_HUMAN	MGST3	946412
GEMI2_HUMAN	GEMIN2	9750000	7060000	7540000	7050000
IRF6_HUMAN	IRF6	6150000	10500000	8350000	8780000
TX1B3_HUMAN	TAX1BP3	101000000	65000000	71500000	74500000
GIPC1_HUMAN	GIPC1	31700000	29600000	35200000	40200000
IKKB_HUMAN	IKBKB	5940000	7060000	8350000	6870000
HAT1_HUMAN	HAT1	64800000	55400000	62200000	69500000
UB2L6_HUMAN	UBE2L6	13400000	20600000	24000000	15800000
CSKP_HUMAN	CASK	21300000	17600000	22300000	22300000
PLD2_HUMAN	PLD2	1170000		1850000	1550000
EREG_HUMAN	EREG	25000000	2310000	3290000	10500000
QCR8_HUMAN	UQCRQ	4090000	4610000	11000000	4340000
ML12A_HUMAN;ML12B_HUMAN	MYL12A;MYL12B	150000000	205000000	311000000	186000000
HGS_HUMAN	HGS	73100000	65600000	78400000	87000000
AURKA_HUMAN	AURKA	1860000	2970000	2690000	1460000
RAB7L_HUMAN	RAB29	3320000	3710000	3540000	2180000
CLGN_HUMAN	CLGN	2320000	6340000	2840000	2310000
VP26C_HUMAN	VPS26C	8370000	11400000	9700000	14900000
MYPT1_HUMAN	PPP1R12A	46500000	60300000	61500000	58400000
MYPT1_HUMAN	PPP1R12A
S27A2_HUMAN	SLC27A2	48900000	43800000	52500000	35400000
GAK_HUMAN	GAK	10700000	13600000	8830000	11400000
HNRDL_HUMAN	HNRNPDL	162000000	132000000	119000000	125000000
XPO1_HUMAN	XPO1	225000000	209000000	203000000	195000000
BTAF1_HUMAN	BTAF1	12700000	8630000	9560000	9850000
ARHGA_HUMAN	ARHGEF10		2730000	3010000	3250000
ZN609_HUMAN	ZNF609	1400000	1190000	1030000	1130000
SPTN2_HUMAN	SPTBN2	14400000	25100000	32300000	21200000
MAST4_HUMAN	MAST4	679334	2320000	1540000	778483
SC16A_HUMAN	SEC16A	36300000	40600000	38600000	45100000
PLXB2_HUMAN	PLXNB2	130000000	136000000	150000000	147000000
KHNYN_HUMAN	KHNYN	3000000	3370000	3140000	3300000
TCPR2_HUMAN	TECPR2	3220000	3350000	3030000	3040000
SR140_HUMAN	U2SURP	31100000	29600000	20500000	21300000
SET1A_HUMAN	SETD1A	8440000	9150000	5380000	6120000
TRNK1_HUMAN	TRANK1		3600000		325310
SYNJ2_HUMAN	SYNJ2	5620000	5080000	6800000	5870000
SYNEM_HUMAN	SYNM
GRRE1_HUMAN	GARRE1	1230000	1230000	933738	833921
KIF3B_HUMAN	KIF3B	13000000	15600000	16800000	16200000
PUR4_HUMAN	PFAS	53700000	57200000	52100000	58800000
ANR28_HUMAN	ANKRD28	27800000	26000000	27100000	32700000
ARHGB_HUMAN	ARHGEF11	1730000	2550000	2360000	2290000
MRPP3_HUMAN	PRORP	10300000	8070000	9960000	6530000
IKKA_HUMAN	CHUK	7890000	6980000	7330000	7210000
LSM1_HUMAN	LSM1	47800000	44600000	46000000	45300000
NPC1_HUMAN	NPC1	4240000	5720000	4980000	4640000
TBX3_HUMAN	TBX3	2390000	2880000	2360000	2110000
PLCB_HUMAN	AGPAT2	7850000	8430000	10500000	5680000
DEGS1_HUMAN	DEGS1	4550000		4580000
SCAM1_HUMAN	SCAMP1	27700000	26200000	32900000	24300000
SCAM2_HUMAN	SCAMP2	65500000	76300000	81100000	52500000
ARC1B_HUMAN	ARPC1B	145000000	124000000	175000000	166000000
ARPC2_HUMAN	ARPC2	167000000	161000000	209000000	181000000
ARPC3_HUMAN	ARPC3	165000000	154000000	209000000	162000000
BET1_HUMAN	BET1	15400000	12300000	12400000	9050000
ZBT7B_HUMAN	ZBTB7B	5790000	5230000	3640000	5930000
RPAC1_HUMAN	POLR1C	35400000	38400000	28800000	32700000
TIF1A_HUMAN	TRIM24	10400000	8600000	6820000	5520000
PGRC2_HUMAN	PGRMC2	49600000	50000000	57300000	29500000
VILL_HUMAN	VILL	955224	1960000	3480000	2290000
RGL2_HUMAN	RGL2	897979	1450000	1450000	1320000
PFD6_HUMAN	PFDN6	150000000	166000000	170000000	176000000
NKRF_HUMAN	NKRF	3270000	2360000	875550	2410000
GNPAT_HUMAN	GNPAT	9960000	13700000	5420000	12000000
LAMA5_HUMAN	LAMA5	6250000	12300000	11300000	7370000
ZN185_HUMAN	ZNF185	15200000	20800000	20800000	13300000
ZN185_HUMAN	ZNF185	3890000	5710000	4680000	3220000
CASC3_HUMAN	CASC3	3220000	3890000	2810000	2660000
RT12_HUMAN	MRPS12	16800000	14400000	13000000	15800000
OBRG_HUMAN	LEPROT		437196	500005	533107
ACOX3_HUMAN	ACOX3	28500000	32500000	32700000	30400000
RER1_HUMAN	RER1	37000000	29400000	33800000	27200000
SURF4_HUMAN	SURF4	52000000	56000000	53200000	33000000
MK13_HUMAN	MAPK13	216000000	204000000	224000000	200000000
SPTC1_HUMAN	SPTLC1	495000000	429000000	433000000	446000000
SPTC2_HUMAN	SPTLC2	41600000	34300000	35500000	34000000
FANCG_HUMAN	FANCG	997450	1150000	1010000	805360
OGT1_HUMAN	OGT	16000000	14300000	11300000	12300000
PMM2_HUMAN	PMM2	89100000	95000000	113000000	101000000
RA51B_HUMAN	RAD51B	307515	622395	551550
TM9S1_HUMAN	TM9SF1	3040000	4550000	5490000	4000000
INP4B_HUMAN	INPP4B	7240000	10700000	11600000	10800000
TRI18_HUMAN	MID1	10300000	7160000	6840000	4150000
HMGB3_HUMAN	HMGB3	272000000	253000000	240000000	229000000
PPM1G_HUMAN	PPM1G	83300000	73700000	66600000	68100000
SHIP2_HUMAN	INPPL1	42400000	50500000	51200000	41300000
FANCA_HUMAN	FANCA	945639	751993	1220000	987686
EIF3D_HUMAN	EIF3D	143000000	126000000	134000000	140000000
EIF3H_HUMAN	EIF3H	173000000	130000000	159000000	157000000
HDAC3_HUMAN	HDAC3	2500000	2660000	1140000	3270000
BCAT2_HUMAN	BCAT2	49000000	52300000	107000000	61800000
IPO8_HUMAN	IPO8	17900000	15600000	13300000	11600000
STX7_HUMAN	STX7	22200000	34300000	28200000	26500000
TNC18_HUMAN	TNRC18	3930000	3860000	2350000	2090000
MOT4_HUMAN	SLC16A3			6780000	4310000
COPT1_HUMAN	SLC31A1	10800000		5170000	6820000
MRP4_HUMAN	ABCC4	1730000	2370000	3580000	1880000
MRP5_HUMAN	ABCC5	1140000	2230000	2370000	1860000
RPA34_HUMAN	POLR1G	10100000	10800000	7180000	7930000
TLR3_HUMAN	TLR3	3100000	5740000	4010000	3960000
P4HA2_HUMAN	P4HA2	28300000	15600000	25500000	18000000
CAN5_HUMAN	CAPN5				774112
YKT6_HUMAN	YKT6	58300000	55400000	62200000	49400000
ARPC5_HUMAN	ARPC5	264000000	319000000	357000000	291000000
RPB4_HUMAN	POLR2D	12500000	12000000	11800000	10300000
CLOCK_HUMAN	CLOCK	1360000	1620000		788504
DDX3Y_HUMAN	DDX3Y		14400000	21300000	16800000
PDPK1_HUMAN	PDPK1	8340000	10800000	11700000	11400000
TPSN_HUMAN	TAPBP	29500000	27400000	39900000	19700000
R113A_HUMAN	RNF113A	15600000	16700000	14900000	18800000
KDM6A_HUMAN	KDM6A			6480000	9400000
KCNN4_HUMAN	KCNN4
DHX15_HUMAN	DHX15	183000000	172000000	168000000	159000000
MCES_HUMAN	RNMT	27500000	30900000	25700000	27400000
ZZEF1_HUMAN	ZZEF1	8940000	8830000	9770000	9710000
ASAP2_HUMAN	ASAP2	4460000	5450000	6840000	6710000
ASAP2_HUMAN	ASAP2
TTI1_HUMAN	TTI1	11000000	9470000	10400000	10300000
RRP8_HUMAN	RRP8	2590000	2230000	2500000	1510000
PJA2_HUMAN	PJA2	2140000	3340000	1080000	2200000
SI1L1_HUMAN	SIPA1L1	5180000	6220000	6950000	6070000
CYB5B_HUMAN	CYB5B	193000000	172000000	362000000	189000000
PRP4_HUMAN	PRPF4	34600000	37500000	27100000	32800000
SERA_HUMAN	PHGDH	764000000	1110000000	1090000000	1100000000
ADA12_HUMAN	ADAM12	1490000	1770000	2160000	1770000
GPR39_HUMAN	GPR39	1550000	2350000	2320000	2030000
DC1L2_HUMAN	DYNC1LI2	70800000	118000000	113000000	106000000
PSMD3_HUMAN	PSMD3	223000000	214000000	204000000	222000000
RFOX2_HUMAN	RBFOX2	20100000	17900000	19400000	17300000
PAPS1_HUMAN	PAPSS1	83700000	86800000	98900000	94400000
ZNHI1_HUMAN	ZNHIT1	1290000	1550000	992950	972869
ZW10_HUMAN	ZW10	12100000	13700000	15100000	10600000
SPIT1_HUMAN	SPINT1	28900000	36200000	34400000	49600000
SPIT1_HUMAN	SPINT1	5080000	5770000	6490000	7220000
B4GT5_HUMAN	B4GALT5	15900000	16500000	20500000	14400000
SNUT1_HUMAN	SART1	13300000	13200000	9620000	8620000
SPIT2_HUMAN	SPINT2	22500000	32800000	34300000	32600000
GPAA1_HUMAN	GPAA1	14600000	13100000	11900000	8310000
DAPK3_HUMAN	DAPK3	5930000	5810000	6690000	3930000
TGFI1_HUMAN	TGFB1I1		479179	2130000	4520000
AP5Z1_HUMAN	AP5Z1	3180000	2720000	3240000	3110000
HS12A_HUMAN	HSPA12A		6200000	6630000	7270000
CP110_HUMAN	CCP110	5080000	4930000	5260000	4680000
CTIF_HUMAN	CTIF	1830000	2390000	1880000	2800000
MTSS1_HUMAN	MTSS1	55053	35680.3		77911.3
VIP2_HUMAN	PPIP5K2	10300000	12300000	12500000	10300000
M3K7_HUMAN	MAP3K7	7030000	7390000	6620000	5970000
MCA3_HUMAN	EEF1E1	134000000	150000000	146000000	169000000
RIPK2_HUMAN	RIPK2	2570000	2100000	2630000	1620000
WDR62_HUMAN	WDR62	3240000	2670000	2680000	2290000
HNRPR_HUMAN	HNRNPR	203000000	189000000	128000000	158000000
PRPF3_HUMAN	PRPF3	18200000	17400000	12300000	13300000
TXNL1_HUMAN	TXNL1	154000000	171000000	140000000	169000000
TPD54_HUMAN	TPD52L2	92100000	96400000	118000000	97400000
TPD54_HUMAN	TPD52L2	10000000	10600000	12600000	18400000
EMC8_HUMAN	EMC8	24200000	16200000	24200000	22400000
ERI3_HUMAN	ERI3	15000000	19400000	20000000	23600000
SYNJ1_HUMAN	SYNJ1	6520000	4610000	4550000	4530000
FIBP_HUMAN	FIBP	9540000	10800000	10100000	9680000
IF4G3_HUMAN	EIF4G3	9080000	9980000	9090000	11900000
PPIH_HUMAN	PPIH	73600000	74600000	75900000	76500000
HTRA2_HUMAN	HTRA2	17000000	22100000	28500000	28200000
KLF4_HUMAN	KLF4		738543	489160	408820
ARK72_HUMAN	AKR7A2	32800000	32300000	35800000	33400000
E41L2_HUMAN	EPB41L2	127000000	192000000	213000000	200000000
E41L2_HUMAN	EPB41L2	74700000	106000000	113000000	113000000
TGON2_HUMAN	TGOLN2	9790000	13700000	14300000	8860000
RA51C_HUMAN	RAD51C	3330000	2790000
LTOR5_HUMAN	LAMTOR5	33900000	27200000	43100000	46200000
B4GA1_HUMAN	B4GAT1	2710000	6520000	6030000	4240000
WIPF1_HUMAN	WIPF1
AT8B1_HUMAN	ATP8B1			6680000	2700000
FOXO3_HUMAN	FOXO3	856893	784653	1300000	1140000
AKA10_HUMAN	AKAP10	5130000	5930000	6220000	7120000
DENR_HUMAN	DENR	58300000	67300000	64400000	64900000
XPOT_HUMAN	XPOT	91300000	89500000	75500000	104000000
DNPH1_HUMAN	DNPH1	91400000	83000000	140000000	114000000
TIM44_HUMAN	TIMM44	46200000	101000000	122000000	103000000
TPPC3_HUMAN	TRAPPC3	40200000	43500000	36700000	36900000
CHM2A_HUMAN	CHMP2A	33400000	28200000	28000000	35400000
NCK2_HUMAN	NCK2	5270000	7540000	6320000	6910000
TSN6_HUMAN	TSPAN6	4030000	5280000	4280000	5120000
PLRG1_HUMAN	PLRG1	33100000	27000000	19100000	20100000
PRC1_HUMAN	PRC1	5350000	7900000	8340000	5780000
RGS10_HUMAN	RGS10	18300000	32100000	31100000	24400000
ZN207_HUMAN	ZNF207	143000000	124000000	127000000	126000000
NDUB5_HUMAN	NDUFB5			5430000
NDUA2_HUMAN	NDUFA2		10400000	11700000	10900000
GET3_HUMAN	GET3	172000000	147000000	164000000	153000000
BUB1_HUMAN	BUB1				909473
BUB3_HUMAN	BUB3	570000000	552000000	521000000	488000000
PLPP2_HUMAN	PLPP2	7990000	8580000	11000000	8910000
ACTN4_HUMAN	ACTN4	555000000	602000000	874000000	687000000
MAAI_HUMAN	GSTZ1	27200000	22100000	24800000	34300000
BUD23_HUMAN	BUD23	13800000	14100000	13000000	12600000
TRIA1_HUMAN	TRIAP1	11800000	13400000	13800000	20300000
GATC_HUMAN	GATC	11900000	8630000	7970000	8060000
HTSF1_HUMAN	HTATSF1	207000000	263000000	186000000	140000000
ERD23_HUMAN	KDELR3	3640000	2280000	2920000	2870000
CYH3_HUMAN	CYTH3	11600000	14600000	15900000	13200000
AAKB2_HUMAN	PRKAB2	3290000	3340000	3130000	4350000
AP1G1_HUMAN	AP1G1	89200000	79300000	90500000	93600000
STX6_HUMAN	STX6	15400000	18000000	19000000	13300000
SNG1_HUMAN	SYNGR1
SNG2_HUMAN	SYNGR2	55600000	53800000	54800000	40900000
SNG3_HUMAN	SYNGR3
SGTA_HUMAN	SGTA	86900000	99600000	93000000	93200000
ENSA_HUMAN	ENSA	97500000	137000000	137000000	97800000
SYNC_HUMAN	NARS1	211000000	279000000	278000000	322000000
MYO1B_HUMAN	MYO1B	35800000	55900000	54300000	43700000
MYO1B_HUMAN	MYO1B	998814	1830000	1840000	1340000
SSNA1_HUMAN	SSNA1	6740000	2350000		4080000
PM34_HUMAN	SLC25A17	2440000	1010000	1440000	904637
CPSF5_HUMAN	NUDT21	176000000	185000000	165000000	166000000
LANC1_HUMAN	LANCL1	30600000	48600000	40500000	38700000
STRN_HUMAN	STRN	27800000	30900000	31700000	29800000
U3IP2_HUMAN	RRP9	8570000	10900000	8080000	8720000
SCO2_HUMAN	SCO2	4340000	2860000	4540000	3440000
CF410_HUMAN	CFAP410	1740000	1540000	1720000	1920000
AKAP8_HUMAN	AKAP8	71400000	75500000	59400000	56000000
GTPB6_HUMAN	GTPBP6	7330000	10700000	12200000	11300000
G6PT1_HUMAN	SLC37A4		1460000
ZBT14_HUMAN	ZBTB14	1630000	2720000	1550000	2120000
IDH3B_HUMAN	IDH3B	284000000	251000000	279000000	303000000
NRDC_HUMAN	NRDC	37200000	24100000	24700000	28500000
CALU_HUMAN	CALU	22600000	34800000	28200000	19000000
CALU_HUMAN	CALU	193000000	249000000	251000000	195000000
EDIL3_HUMAN	EDIL3		1490000
SAHH2_HUMAN	AHCYL1	30700000	32500000	35100000	36300000
KIF1C_HUMAN	KIF1C	5020000	3670000	5690000	5720000
ORC5_HUMAN	ORC5	10800000	11400000	8860000	8990000
PDE6D_HUMAN	PDE6D	10600000	14200000	13600000	12200000
ORC4_HUMAN	ORC4	17700000	18200000	13700000	11600000
PEX1_HUMAN	PEX1	18100000	25900000	23100000	20900000
RAD21_HUMAN	RAD21	18500000	21000000	12800000	15700000
TIM8A_HUMAN	TIMM8A	27800000	29500000	31400000	37600000
DHX16_HUMAN	DHX16	32000000	31700000	27500000	25500000
ZNRD2_HUMAN	ZNRD2	26400000	26900000	27300000	24800000
BNI3L_HUMAN	BNIP3L	172997
3BP5_HUMAN	SH3BP5		1880000	1470000	904516
MED14_HUMAN	MED14	4690000	4360000	2840000	3910000
KPRB_HUMAN	PRPSAP2	56400000	53000000	48200000	52100000
SMCA5_HUMAN	SMARCA5	23200000	23400000	15700000	14700000
K0513_HUMAN	KIAA0513
GRIN2_HUMAN	GPRIN2	125596	159818	157957	120202
JIP4_HUMAN	SPAG9	5090000	6620000	6550000	6810000
JIP4_HUMAN	SPAG9	49700000	68600000	65000000	62900000
KIF5C_HUMAN	KIF5C	3690000
MGRN1_HUMAN	MGRN1	1120000	1970000		1500000
SI1L3_HUMAN	SIPA1L3	1670000	4040000	3600000	2860000
TYW4_HUMAN	LCMT2	6690000	4360000	3260000	5130000
AQR_HUMAN	AQR	15100000	13800000	10400000	12200000
OPA1_HUMAN	OPA1	34200000	40100000	43100000	39000000
GANP_HUMAN	MCM3AP	1630000	1960000	1380000	878455
PI51C_HUMAN	PIP5K1C	2390000	2220000	2990000	3110000
KIF1B_HUMAN	KIF1B
KIF1B_HUMAN	KIF1B	10300000	9650000	10900000	8960000
MABP1_HUMAN	MAPKBP1		605502
KDM1A_HUMAN	KDM1A	22400000	24100000	19100000	19100000
TBCD4_HUMAN	TBC1D4	74100000	42400000	90300000	52700000
PHLP1_HUMAN	PHLPP1	2820000	4550000	2630000	3650000
FZD6_HUMAN	FZD6	8140000	2960000	4760000	686050
FADS1_HUMAN	FADS1
PEPL_HUMAN	PPL	42700000	72600000	90500000	71300000
GSDME_HUMAN	GSDME		47000000	52500000	66000000
EVI5_HUMAN	EVI5	2910000	2380000	4650000	2530000
DSCAM_HUMAN	DSCAM		3630000	6330000	1960000
MA1A2_HUMAN	MAN1A2	6090000	3020000	2660000	4550000
MPZL2_HUMAN	MPZL2	7180000	9450000	4870000	3640000
ACSL4_HUMAN	ACSL4	52300000	30200000	34800000	31700000
SNX3_HUMAN	SNX3	101000000	97300000	106000000	115000000
STX10_HUMAN	STX10	12600000	10900000	15200000	10400000
OGA_HUMAN	OGA	34000000	34300000	32300000	31400000
VINEX_HUMAN	SORBS3	14300000	16300000	22200000	17900000
HNRPQ_HUMAN	SYNCRIP	450000000	405000000	419000000	460000000
PRP17_HUMAN	CDC40	4590000	4290000	3690000	4760000
B4GT4_HUMAN	B4GALT4	242445	561474	254333	401988
RNBP6_HUMAN	RANBP6	12600000	15000000	15300000	13900000
NEMF_HUMAN	NEMF	20300000	21800000	26400000	26300000
GMDS_HUMAN	GMDS	29100000	27700000	28800000	33400000
NMT2_HUMAN	NMT2	3220000	2880000	2980000	3710000
CCNT1_HUMAN	CCNT1	12400000	9150000	8250000	10300000
GREM1_HUMAN	GREM1
BUB1B_HUMAN	BUB1B	8050000	10000000	11300000	6830000
PLOD3_HUMAN	PLOD3	34400000	32600000	32500000	28000000
IF4E2_HUMAN	EIF4E2	12600000	11400000	11000000	11700000
CCNT2_HUMAN	CCNT2	539601	910424	734318	877335
DIAP1_HUMAN	DIAPH1	86200000	72300000	88400000	69000000
SEP15_HUMAN	SELENOF	14000000	30900000	25800000	34100000
TSN3_HUMAN	TSPAN3
EXOC3_HUMAN	EXOC3	14300000	17100000	18300000	16200000
PDE8A_HUMAN	PDE8A	919806	446700	820348	1210000
PLIN3_HUMAN	PLIN3	150000000	201000000	272000000	243000000
MOT2_HUMAN	SLC16A7
RAD1_HUMAN	RAD1	6080000	6410000	4520000	3570000
ANM3_HUMAN	PRMT3	33200000	29100000	26600000	23700000
IMA7_HUMAN	KPNA6	80400000	94200000	80100000	91400000
UGDH_HUMAN	UGDH	208000000	281000000	308000000	284000000
LPXN_HUMAN	LPXN	4620000
CTND1_HUMAN	CTNND1	505282	1110000	881310
CTND1_HUMAN	CTNND1	104000000	128000000	157000000	134000000
ICMT_HUMAN	ICMT	8600000	6010000	8090000	4220000
EIF1B_HUMAN	EIF1B	2830000
SNX2_HUMAN	SNX2	98300000	137000000	117000000	139000000
SNX2_HUMAN	SNX2	6710000	8160000	12300000	6140000
DPM1_HUMAN	DPM1	317000000	310000000	385000000	167000000
USO1_HUMAN	USO1	82800000	115000000	120000000	109000000
RT14_HUMAN	MRPS14	14600000	15200000	18800000	15300000
TOM1_HUMAN	TOM1	8880000	13300000	11800000	15600000
H2B1C_HUMAN;H2B1D_HUMAN;H2B1H_HUMAN;H2B1K_HUMAN;H2B1M_HUMAN;H2B1N_HUMAN;H2B2F_HUMAN;H2BFS_HUMAN	H2BC10;H2BC12;H2BC12L;H2BC14;H2BC15;H2BC18;H2BC5;H2BC9	2710000000	1780000000	1820000000	1610000000
F262_HUMAN	PFKFB2	10300000	14400000	15200000	13500000
CCD22_HUMAN	CCDC22	10600000	11600000	12800000	12100000
PQBP1_HUMAN	PQBP1	58000000	60700000	55700000	53600000
PRAF2_HUMAN	PRAF2	20500000	27700000	29200000	21900000
DKC1_HUMAN	DKC1	13500000	12200000	11900000	10800000
IF2P_HUMAN	EIF5B	149000000	141000000	144000000	154000000
EDF1_HUMAN	EDF1	89400000	92800000	105000000	112000000
KIN17_HUMAN	KIN	1040000	1250000	1010000	1110000
DIAP2_HUMAN	DIAPH2	154000000	170000000		124000000
DNJA2_HUMAN	DNAJA2	71600000	75100000	71500000	72300000
BRD4_HUMAN	BRD4	19900000	18900000	15400000	16700000
CUTA_HUMAN	CUTA	46900000	36100000	52800000	61800000
OPHN1_HUMAN	OPHN1	849030	965091	1240000	756222
NSMA_HUMAN	SMPD2	1460000	1680000	2730000	2280000
TBL1X_HUMAN	TBL1X	1850000	2310000	2140000	3080000
HUS1_HUMAN	HUS1	7670000	8830000	8110000	7370000
PFD1_HUMAN	PFDN1	97800000	101000000	111000000	122000000
PP1RB_HUMAN	PPP1R11	5240000	4940000	6190000	7030000
NBN_HUMAN	NBN	20300000	19300000	9670000	11500000
NOL3_HUMAN	NOL3	19700000	20700000	24600000	24400000
MCE1_HUMAN	RNGTT	14700000	20700000	15100000	20200000
ABCB7_HUMAN	ABCB7	12400000	8840000	13200000	5480000
MITF_HUMAN	MITF	1570000	993618		1570000
PLCH2_HUMAN	PLCH2	1530000	1720000	1720000	1350000
SRGP2_HUMAN	SRGAP2	13600000	10300000	13400000	10300000
CAPON_HUMAN	NOS1AP	1070000	526150	832867	1080000
AUXI_HUMAN	DNAJC6
WDR1_HUMAN	WDR1	418000000	389000000	523000000	464000000
FZD7_HUMAN	FZD7	1920000	2310000	2240000	1980000
MEGF6_HUMAN	MEGF6
ATP9A_HUMAN	ATP9A		548139	507877	626335
N4BP1_HUMAN	N4BP1	5970000	6140000	5850000	5790000
ROCK2_HUMAN	ROCK2	25200000	23300000	27000000	22200000
CLAP2_HUMAN	CLASP2	4080000	3280000	3020000	3860000
CLAP2_HUMAN	CLASP2	15200000	17500000	16500000	14700000
PTCD1_HUMAN	PTCD1	5460000	5200000	4930000	3300000
COBL_HUMAN	COBL	87944.9	117515	153817	161519
CPNE3_HUMAN	CPNE3	171000000	171000000	174000000	149000000
DEPD5_HUMAN	DEPDC5	764883			1010000
ATG13_HUMAN	ATG13	418000000	388000000	450000000	379000000
ICOSL_HUMAN	ICOSLG	6660000	3360000	4670000	3560000
LIPA3_HUMAN	PPFIA3	281338	507765	411915	261717
HIP1R_HUMAN	HIP1R	10800000	7830000	8620000	7800000
OBSL1_HUMAN	OBSL1	3620000	3370000	3780000	4150000
BRE1B_HUMAN	RNF40	27100000	29700000	21800000	22000000
ZC11A_HUMAN	ZC3H11A	7470000	8280000	6330000	5580000
CLU_HUMAN	CLUH	75900000	50800000	51100000	46400000
CAND2_HUMAN	CAND2
T22D2_HUMAN	TSC22D2	9230000	12300000	11800000	14100000
KDM4A_HUMAN	KDM4A	2820000	3420000	2470000	2650000
DJC13_HUMAN	DNAJC13	8580000	10300000	9770000	9910000
PHAR2_HUMAN	PHACTR2	6970000	7410000	7310000	5560000
PP6R2_HUMAN	PPP6R2	25700000	23300000	27600000	23400000
CNOT3_HUMAN	CNOT3	23600000	28200000	24900000	22400000
ANR17_HUMAN	ANKRD17	37000000	36600000	37100000	33900000
SIN3B_HUMAN	SIN3B	4580000	6360000	3870000	2920000
AT2C2_HUMAN	ATP2C2		1800000	2140000	2330000
DNJB6_HUMAN	DNAJB6	10100000	9310000	10900000	9990000
XYLB_HUMAN	XYLB	1160000	1450000	1340000	1470000
COQ9_HUMAN	COQ9	7570000	7320000	8370000	10600000
GGCT_HUMAN	GGCT	109000000	117000000	119000000	114000000
NDUS7_HUMAN	NDUFS7	7940000	7790000	8110000	4770000
NDUS2_HUMAN	NDUFS2	7280000	5190000	7620000	6390000
ZPR1_HUMAN	ZPR1	52100000	78500000	55000000	58700000
NIPS2_HUMAN	NIPSNAP2	32200000	53000000	54700000	55200000
SEM7A_HUMAN	SEMA7A	10400000
HMMR_HUMAN	HMMR	4610000	4670000	4360000	3950000
PDCD6_HUMAN	PDCD6	270000000	303000000	317000000	326000000
TBCA_HUMAN	TBCA	281000000	338000000	343000000	328000000
VATG1_HUMAN	ATP6V1G1	33700000	56400000	50100000	53500000
VPS4B_HUMAN	VPS4B	72200000	81800000	89200000	92500000
MPU1_HUMAN	MPDU1	50200000	33800000	29500000	18700000
ENTP3_HUMAN	ENTPD3	196942	367293	191630	182033
ENTP5_HUMAN	ENTPD5	1620000	2200000	611404	2580000
ZN217_HUMAN	ZNF217	1900000	2040000	2100000	1530000
BCAS1_HUMAN	BCAS1		3680000	2460000	1640000
H2AY_HUMAN	MACROH2A1	36000000	27100000	25800000	30600000
SH3L1_HUMAN	SH3BGRL	56700000	103000000	132000000	103000000
FLNB_HUMAN	FLNB	295000000	397000000	591000000	608000000
NCOR1_HUMAN	NCOR1	20700000	21600000	5110000	6210000
VAMP4_HUMAN	VAMP4	1360000	1170000		1150000
NDUS6_HUMAN	NDUFS6	3120000	2290000	4670000	3080000
PEX14_HUMAN	PEX14	3530000	3880000	4850000	2730000
TRIM3_HUMAN	TRIM3	5030000	5010000	4480000	3980000
ULK1_HUMAN	ULK1		456746	770145	762704
TULP3_HUMAN	TULP3	2830000	2210000	2180000	1840000
CISY_HUMAN	CS	347000000	368000000	420000000	405000000
SPAG7_HUMAN	SPAG7	17300000	16600000	14700000	12200000
RM33_HUMAN	MRPL33	5060000	3720000	4900000	4330000
SC22B_HUMAN	SEC22B	103000000	80000000	103000000	70300000
PR40A_HUMAN	PRPF40A	72300000	55500000	43900000	51400000
PR40A_HUMAN	PRPF40A	16600000	21800000	15100000	17100000
TACC1_HUMAN	TACC1	26100000	31400000	31400000	26500000
NDK6_HUMAN	NME6	1920000	5040000		2970000
CDC45_HUMAN	CDC45	2950000	1650000	1800000	1190000
GGYF1_HUMAN	GIGYF1	235897	230746	399296	212855
LRCH4_HUMAN	LRCH4	2990000	4470000	4560000	3650000
VP26A_HUMAN	VPS26A	61800000	60900000	71600000	66000000
MPPB_HUMAN	PMPCB	55200000	62700000	70000000	70500000
SAP30_HUMAN	SAP30	5300000
MED24_HUMAN	MED24	4970000	4330000	3100000	4580000
KTNA1_HUMAN	KATNA1	19700000	24200000	17800000	24600000
Z324A_HUMAN	ZNF324	111000000	111000000	134000000	124000000
PSIP1_HUMAN	PSIP1	69000000	55300000	51800000	45600000
ERLN1_HUMAN	ERLIN1	21600000	31600000	40800000	31000000
SUPT3_HUMAN	SUPT3H		1170000		2080000
NDUS3_HUMAN	NDUFS3	9510000	6330000	9430000	6050000
SRS10_HUMAN	SRSF10	13500000	8330000	7410000	7740000
GEMI_HUMAN	GMNN		4730000	1720000
CLN5_HUMAN	CLN5	9800000	10200000	8560000	6970000
HSBP1_HUMAN	HSBP1	25300000	27900000	33800000	27300000
ECI2_HUMAN	ECI2	11300000	13300000	16700000	17200000
KHDR3_HUMAN	KHDRBS3
TAF5L_HUMAN	TAF5L	3210000	4470000	2460000	10100000
EED_HUMAN	EED	12200000	11500000	11200000	9780000
BAF_HUMAN	BANF1	1170000000	761000000	798000000	838000000
SF3B1_HUMAN	SF3B1	65300000	59900000	38200000	48100000
CSDE1_HUMAN	CSDE1	132000000	87500000	112000000	96200000
WBP4_HUMAN	WBP4	20700000	21400000	15200000	8040000
PRKRA_HUMAN	PRKRA	18700000	19300000	22300000	26800000
RPC9_HUMAN	CRCP	4610000	4880000	4690000	3840000
ITA10_HUMAN	ITGA10
KS6A5_HUMAN	RPS6KA5	927100	1600000	1160000	1690000
MED6_HUMAN	MED6	7310000	5850000	5400000	5120000
MYCB2_HUMAN	MYCBP2	5920000	10400000	4600000	6090000
KBL_HUMAN	GCAT	13700000	8140000	8140000	10200000
NPM3_HUMAN	NPM3	55300000	41800000	42000000	69600000
LYPA1_HUMAN	LYPLA1	93400000	94600000	108000000	116000000
ERAL1_HUMAN	ERAL1	16300000	11300000	9710000	7580000
CREG1_HUMAN	CREG1	11200000	15000000	13200000	12500000
SPB7_HUMAN	SERPINB7	816449	1240000	1050000	855284
U520_HUMAN	SNRNP200	52900000	53100000	37600000	43300000
MTU1_HUMAN	TRMU	5960000	5530000	6610000	5090000
TIPRL_HUMAN	TIPRL	48000000	58200000	72300000	76400000
TM1L1_HUMAN	TOM1L1	32300000	29200000	36400000	34300000
KS6A4_HUMAN	RPS6KA4	18100000	17100000	20300000	16200000
SURF6_HUMAN	SURF6	12800000	9010000	3950000	12100000
PPM1B_HUMAN	PPM1B	53700000	64800000	60500000	57500000
ADAP1_HUMAN	ADAP1	2070000	2940000	4570000	3810000
UTP20_HUMAN	UTP20	2730000	1250000	791918	1600000
NU155_HUMAN	NUP155	27100000	24800000	23400000	21900000
XRP2_HUMAN	RP2	10200000	8160000	13700000	12300000
WDHD1_HUMAN	WDHD1	16100000	17600000	14900000	11400000
CRTAP_HUMAN	CRTAP	11200000	14600000	16600000	10100000
P3C2G_HUMAN	PIK3C2G	8760000	6670000	12300000	8030000
RENR_HUMAN	ATP6AP2	5960000	5130000	5060000	3520000
RNH2A_HUMAN	RNASEH2A	36200000	34900000	33900000	32000000
CD123_HUMAN	CDC123	10800000	11800000	14000000	15200000
CAN15_HUMAN	CAPN15	632078	920634	705748	518169
BCAR3_HUMAN	BCAR3	1550000		1340000	1950000
POP7_HUMAN	POP7	6320000	7850000	6320000	7500000
RPP40_HUMAN	RPP40	4140000	6000000	3760000	6780000
EIF3G_HUMAN	EIF3G	111000000	95600000	98200000	113000000
EIF3J_HUMAN	EIF3J	261000000	234000000	266000000	301000000
CBR3_HUMAN	CBR3	85600000	76700000	73400000	85900000
PSD10_HUMAN	PSMD10	47300000	31100000	41500000	38600000
AP1G2_HUMAN	AP1G2	7590000	3450000	5730000	5150000
FACE1_HUMAN	ZMPSTE24	40600000	36300000	39600000	25100000
PPR37_HUMAN	PPP1R37	3780000	5890000	5090000	4890000
TPC6A_HUMAN	TRAPPC6A	11500000		23700000	20500000
IDHC_HUMAN	IDH1	342000000	538000000	492000000	512000000
GATB_HUMAN	GATB	14800000	14600000	11800000	11100000
SCO1_HUMAN	SCO1	22600000	21800000	30800000	23500000
ATRN_HUMAN	ATRN	2550000	3050000	2180000	2100000
RBBP9_HUMAN	RBBP9	14600000	13300000	22700000	20000000
STAM2_HUMAN	STAM2	103000000	101000000	94700000	87100000
AL1L1_HUMAN	ALDH1L1		1540000	3540000	6200000
TUSC2_HUMAN	TUSC2	4300000	1630000	3780000	2920000
DGAT1_HUMAN	DGAT1	1040000	860118	704278	649494
CCNK_HUMAN	CCNK	5050000	6220000	3650000	3650000
DHRS3_HUMAN	DHRS3
PRAF3_HUMAN	ARL6IP5	79100000	108000000	119000000	90900000
DYSF_HUMAN	DYSF				13000000
PIAS2_HUMAN	PIAS2	6400000	7080000	5700000	6010000
SPF27_HUMAN	BCAS2	41300000	32100000	21500000	25200000
DCTN3_HUMAN	DCTN3	28800000	25200000	36200000	33000000
DNJC8_HUMAN	DNAJC8	120000000	108000000	112000000	112000000
SPF30_HUMAN	SMNDC1	31500000	39500000	34000000	33000000
RAD17_HUMAN	RAD17	1460000	2390000	2320000	2020000
ATP5H_HUMAN	ATP5PD	62200000	58200000	87100000	26400000
TSN9_HUMAN	TSPAN9		1980000
FLOT1_HUMAN	FLOT1	39500000	30600000	70100000	63700000
TRIO_HUMAN	TRIO	3250000	4440000	5060000	3940000
ATP5L_HUMAN	ATP5MG	38000000	39000000	53200000	21500000
MPDZ_HUMAN	MPDZ
CBPD_HUMAN	CPD	25100000	34000000	23000000	23300000
GLRX3_HUMAN	GLRX3	145000000	143000000	159000000	150000000
KRT34_HUMAN	KRT34	114000000
KRT36_HUMAN	KRT36	36900000
RL1D1_HUMAN	RSL1D1	18300000	14400000	13400000	14100000
WFS1_HUMAN	WFS1	7700000	14100000	15800000	13300000
ANXA9_HUMAN	ANXA9	3320000	6500000	7150000	7500000
CLPX_HUMAN	CLPX	36600000	21400000	23000000	20100000
NEBL_HUMAN	NEBL	19600000	30900000	29400000	24400000
S14L2_HUMAN	SEC14L2	2930000	3430000	4500000	2920000
STC2_HUMAN	STC2	9690000	7870000	17600000
CIAO1_HUMAN	CIAO1	50400000	56500000	54700000	55600000
PDE5A_HUMAN	PDE5A	14400000	20700000	28200000	21300000
DFFB_HUMAN	DFFB	2700000	4120000	4310000	4110000
ZFAN5_HUMAN	ZFAND5	489458	866119		1030000
SRP72_HUMAN	SRP72	385000000	333000000	383000000	403000000
JTB_HUMAN	JTB	18800000	30000000	32200000	21600000
CYTF_HUMAN	CST7	11600000		12700000	10500000
DXO_HUMAN	DXO	1300000	2390000	2020000	2580000
DDAH1_HUMAN	DDAH1	149000000	144000000	169000000	171000000
RECQ4_HUMAN	RECQL4	8220000	10600000	8340000	5660000
RECQ5_HUMAN	RECQL5	54900000	50100000	64300000	96800000
RMP_HUMAN	URI1	13800000	15300000	14100000	18100000
B3GA3_HUMAN	B3GAT3	632273	635231	747945	583395
ST17B_HUMAN	STK17B	2900000	4640000	4330000	5360000
MTA2_HUMAN	MTA2	75200000	54800000	41900000	39000000
STK10_HUMAN	STK10	9000000	13700000	15800000	15900000
GFPT2_HUMAN	GFPT2
ATG12_HUMAN	ATG12	7650000	11200000	14200000	14000000
LTN1_HUMAN	LTN1	3590000	3930000	4060000	3990000
TOM70_HUMAN	TOMM70	9050000	10700000	12900000	7720000
PKHG5_HUMAN	PLEKHG5			5790000
IPO13_HUMAN	IPO13	6380000	7580000	7390000	7060000
DDHD2_HUMAN	DDHD2	2500000	2570000	2590000	2270000
MYO1D_HUMAN	MYO1D	15500000	22600000	34700000	26000000
TOX4_HUMAN	TOX4	65600000	51100000	41400000	48700000
MICA2_HUMAN	MICAL2	5680000	6270000	8310000	9720000
K0754_HUMAN	MACF1
SC24D_HUMAN	SEC24D	26500000	31100000	35600000	38200000
NFASC_HUMAN	NFASC
ST65G_HUMAN	SUPT7L	7000000	7440000	5170000	5610000
FCSD2_HUMAN	FCHSD2		933427	755730	310108
UFL1_HUMAN	UFL1	23200000	27400000	29600000	19200000
SRBS2_HUMAN	SORBS2	1200000	5040000	1330000	3340000
SASH1_HUMAN	SASH1	957131	2510000	1540000	2030000
CSCL1_HUMAN	TMEM63A	2000000	2170000	3900000	3030000
FARP2_HUMAN	FARP2	2430000	2540000	2420000	1890000
UBXN7_HUMAN	UBXN7	16300000	20900000	17400000	17400000
PLPHP_HUMAN	PLPBP	47100000	47500000	57900000	53100000
ERLN2_HUMAN	ERLIN2	8960000	11700000	15900000	14800000
PRP6_HUMAN	PRPF6	195000000	222000000	127000000	131000000
PCF11_HUMAN	PCF11	9650000	9960000	5970000	6730000
FRYL_HUMAN	FRYL	4540000	4390000	5460000	4810000
NFAT5_HUMAN	NFAT5	4320000	5080000	5060000	6120000
ENDD1_HUMAN	ENDOD1	55300000	49200000	53600000	66300000
GLSK_HUMAN	GLS	5020000	6320000	6810000	8160000
GLSK_HUMAN	GLS	108000000	88400000	110000000	79800000
HAUS5_HUMAN	HAUS5	11600000	10900000	11500000	9770000
ABLM3_HUMAN	ABLIM3
FBX21_HUMAN	FBXO21	6070000	7890000	7270000	6900000
KDM4B_HUMAN	KDM4B	7510000	9990000	8720000	11700000
RHBT3_HUMAN	RHOBTB3	8140000	8430000	10400000	8780000
SOGA1_HUMAN	SOGA1		1330000
UBP19_HUMAN	USP19	15600000	13900000	11800000	14800000
WDR47_HUMAN	WDR47	1970000	1670000	1600000	2340000
AP2A2_HUMAN	AP2A2	12400000	23000000	13800000	19600000
AP2A2_HUMAN	AP2A2	39600000	54600000	45600000	43900000
SC31A_HUMAN	SEC31A	407000000	252000000	257000000	323000000
SC31A_HUMAN	SEC31A
CSTN1_HUMAN	CLSTN1	4720000		2060000
HEXI1_HUMAN	HEXIM1	52000000	53900000	41500000	49400000
ZO3_HUMAN	TJP3	5440000	11300000	9340000	9060000
RPP14_HUMAN	RPP14	5950000	8010000	5950000	5990000
CCNB2_HUMAN	CCNB2	5130000	5320000	6800000	4730000
KCNK2_HUMAN	KCNK2
YIF1A_HUMAN	YIF1A	11900000	6620000	7810000	3960000
UBR5_HUMAN	UBR5	15100000	11900000	10300000	10900000
AGFG2_HUMAN	AGFG2	3350000	3880000	3770000	4020000
PRS23_HUMAN	PRSS23	3180000	6440000	5340000	5440000
SCAF4_HUMAN	SCAF4	21800000	21500000	17700000	16400000
MFN2_HUMAN	MFN2	3080000	4190000	4230000	2220000
SPN1_HUMAN	SNUPN	6970000	8550000	6960000	5360000
UBE4B_HUMAN	UBE4B	15300000	13600000	11900000	15100000
ZFPL1_HUMAN	ZFPL1	38900000	31500000	26900000	29300000
ELP1_HUMAN	ELP1	55500000	58300000	53800000	54600000
GBRAP_HUMAN	GABARAP	8150000	4140000	6280000	5820000
NDUB4_HUMAN	NDUFB4	3260000	4070000	7660000	4110000
NDUB8_HUMAN	NDUFB8	2350000	1460000
SCEL_HUMAN	SCEL		8440000	6270000	4650000
VAMP5_HUMAN	VAMP5
RTN3_HUMAN	RTN3	29100000	59500000	43600000	105000000
RTN3_HUMAN	RTN3	199000000	196000000	244000000	245000000
RCBT2_HUMAN	RCBTB2
LETM1_HUMAN	LETM1	38400000	38900000	57900000	27500000
EPN2_HUMAN	EPN2	1340000	1840000	1540000	1240000
STBD1_HUMAN	STBD1	715731	1210000	896963	1450000
ZRAB2_HUMAN	ZRANB2	32200000	35600000	30200000	39600000
SNX4_HUMAN	SNX4	7990000	16100000	17500000	13900000
ZWINT_HUMAN	ZWINT	3900000	2990000	2480000	1370000
LC7L3_HUMAN	LUC7L3	84700000	83800000	66300000	68700000
KI20A_HUMAN	KIF20A	2230000	2380000	1390000
KIF4A_HUMAN	KIF4A	15400000	12900000	9690000	6500000
MBD4_HUMAN	MBD4	79800000	65300000	69400000	41500000
MTMR5_HUMAN	SBF1	3810000	3520000	4590000	5540000
GOSR1_HUMAN	GOSR1	11100000	8800000	11900000	9970000
KAT7_HUMAN	KAT7	3340000	2170000	2540000	773313
ATE1_HUMAN	ATE1	4430000	6750000	5820000	7750000
ATE1_HUMAN	ATE1	5510000	6050000	6790000	8620000
CCDB1_HUMAN	CCNDBP1				2000000
VAPB_HUMAN	VAPB	68000000	49400000	69100000	46900000
SNAPN_HUMAN	SNAPIN	28700000	25000000	33400000	34700000
MPZL1_HUMAN	MPZL1	1750000	4810000	3960000	4370000
NDUAA_HUMAN	NDUFA10	3470000	4060000	7690000	3120000
FKBP9_HUMAN	FKBP9	58400000	87700000	79200000	77400000
6PGL_HUMAN	PGLS	134000000	141000000	199000000	189000000
PAPS2_HUMAN	PAPSS2	130000000	90400000	118000000	151000000
SIX3_HUMAN	SIX3
SMC2_HUMAN	SMC2	57700000	53100000	42300000	36300000
ATG7_HUMAN	ATG7	8900000	7980000	8380000	7840000
TACC2_HUMAN	TACC2	74100000	137000000	112000000	143000000
TRI16_HUMAN	TRIM16	28000000	33100000	37900000	41500000
SYFM_HUMAN	FARS2			2630000	6870000
ZBT7A_HUMAN	ZBTB7A	5850000	5510000	2940000	6230000
LYPA2_HUMAN	LYPLA2	87900000	76200000	105000000	109000000
IPO7_HUMAN	IPO7	375000000	428000000	422000000	429000000
ARI2_HUMAN	ARIH2	22200000	20400000	21400000	17100000
TFIP8_HUMAN	TNFAIP8		2490000	1520000	3560000
SLU7_HUMAN	SLU7	4400000	4140000	4890000	3810000
AGM1_HUMAN	PGM3	72800000	81500000	89000000	83200000
MOCS3_HUMAN	MOCS3	5810000	6320000	6080000	7040000
CD2B2_HUMAN	CD2BP2	26600000	22400000	23300000	19800000
ZFYV9_HUMAN	ZFYVE9	3810000	4450000	4940000	5120000
SVIL_HUMAN	SVIL	5670000	9010000	14700000	9080000
BAG4_HUMAN	BAG4	5970000	6460000	6860000	6460000
AHSA1_HUMAN	AHSA1	241000000	189000000	180000000	199000000
PARN_HUMAN	PARN	11500000	16700000	13900000	9890000
PSMG1_HUMAN	PSMG1	40800000	41600000	42400000	38400000
FMNL1_HUMAN	FMNL1
SGPL1_HUMAN	SGPL1	26300000	36700000	41700000	25700000
CLD7_HUMAN	CLDN7		268424	249200	519985
CNEP1_HUMAN	CTDNEP1	2330000	1380000
G6PE_HUMAN	H6PD	9650000	14600000	13300000	15100000
SC24A_HUMAN	SEC24A	43500000	42600000	43900000	38200000
SC24B_HUMAN	SEC24B	16400000	20400000	20100000	18400000
AGRL2_HUMAN	ADGRL2
GTR10_HUMAN	SLC2A10	604683	805748	1000000	595300
NADK_HUMAN	NADK			1930000	1750000
TYDP2_HUMAN	TDP2	15500000	19000000	14100000	13000000
SFT2B_HUMAN	SFT2D2	6670000	5670000	7500000	3990000
ETHE1_HUMAN	ETHE1	105000000	85900000	102000000	139000000
ACSL3_HUMAN	ACSL3	337000000	338000000	309000000	237000000
RPA1_HUMAN	POLR1A	11000000	8850000	7170000	7110000
PCNT_HUMAN	PCNT	3280000	2900000	3720000	2820000
YETS4_HUMAN	YEATS4	7550000	7450000	5850000	6470000
ZBT11_HUMAN	ZBTB11	1930000	2740000		2050000
CNOT4_HUMAN	CNOT4	3710000	3250000	3030000	2170000
STABP_HUMAN	STAMBP	22600000	20100000	18500000	19400000
CPSF4_HUMAN	CPSF4	7540000	8050000	5260000	3920000
ASML_HUMAN	ASMTL	11900000	22000000	22700000	25700000
CDS2_HUMAN	CDS2	14700000	12600000	17500000	11400000
EYA4_HUMAN	EYA4
K2C75_HUMAN	KRT75	106000000
CEP43_HUMAN	CEP43	15900000	13500000	15900000	15400000
RPP29_HUMAN	POP4	5050000	9360000	5810000	7030000
HERC2_HUMAN	HERC2	12000000	11500000	11100000	10500000
RAB3D_HUMAN	RAB3D	21700000		24500000
SNP29_HUMAN	SNAP29	21700000	26100000	27700000	20300000
OXSR1_HUMAN	OXSR1	43400000	54000000	56300000	47300000
GGPPS_HUMAN	GGPS1	22500000	30600000	33800000	24000000
HS74L_HUMAN	HSPA4L	6280000	3560000	3630000	4300000
PTBP3_HUMAN	PTBP3	26700000	43700000	36700000	33000000
STR3N_HUMAN	STARD3NL	2030000	1220000	1710000
LSM8_HUMAN	LSM8	78900000	88500000	77700000	93200000
AP2A1_HUMAN	AP2A1	86500000	87100000	87600000	71900000
WIZ_HUMAN	WIZ	6250000	6440000	4400000	5500000
RIGI_HUMAN	RIGI	5660000	5790000	7420000	6720000
STAU1_HUMAN	STAU1	16600000	15900000	20200000	19800000
TTC4_HUMAN	TTC4	19800000	16300000	13400000	15800000
TM50A_HUMAN	TMEM50A	364371		458013	607823
CAVN2_HUMAN	CAVIN2
BAG2_HUMAN	BAG2	40100000	31700000	30400000	32300000
BAG3_HUMAN	BAG3	38400000	34300000	38300000	38800000
M4K4_HUMAN	MAP4K4	26000000	17900000	34900000	25100000
DCMC_HUMAN	MLYCD	3840000	7720000	9300000	9440000
QORL1_HUMAN	CRYZL1	75600000	95900000	103000000	108000000
AIFM1_HUMAN	AIFM1	97800000	103000000	122000000	84600000
CLIC3_HUMAN	CLIC3	1730000	7130000	3210000	5320000
EMAL2_HUMAN	EML2	5690000	4770000	8210000	8620000
LATS1_HUMAN	LATS1	1360000	1490000	851902	1460000
NUD14_HUMAN	NUDT14	33000000	29900000	28300000	22300000
TSN13_HUMAN	TSPAN13	43000000	71300000	39900000	38100000
TSN15_HUMAN	TSPAN15	2920000	6070000	6870000	5370000
BPNT1_HUMAN	BPNT1	65500000	76900000	92000000	102000000
FADS2_HUMAN	FADS2
DDAH2_HUMAN	DDAH2	9380000	38800000	29300000	33800000
ABHGA_HUMAN	ABHD16A	9150000	8910000	9840000	4800000
TXD12_HUMAN	TXNDC12	122000000	121000000	145000000	133000000
TRUB2_HUMAN	TRUB2	1770000
ECD_HUMAN	ECD	7150000	6770000	7830000	7830000
MBD3_HUMAN	MBD3	11900000	10100000	5760000	6080000
TOP3B_HUMAN	TOP3B	2270000	3110000	3070000	2690000
NUDT3_HUMAN	NUDT3	15600000	16500000	15000000	17000000
AGR2_HUMAN	AGR2	473000000	926000000	662000000	1120000000
APCL_HUMAN	APC2	1850000	1960000	1960000	1010000
PTTG1_HUMAN;PTTG2_HUMAN	PTTG1;PTTG2	10300000	6730000	10200000	9450000
BCL10_HUMAN	BCL10	14800000	14000000	15500000	14700000
NDUBA_HUMAN	NDUFB10	10200000	12100000	18200000	10200000
CLPT1_HUMAN	CLPTM1	24600000	17100000	18900000	10400000
ZBED1_HUMAN	ZBED1		3030000	2720000	1750000
MOC2B_HUMAN	MOCS2	4240000	7640000	4120000	5320000
TOM40_HUMAN	TOMM40	2580000	2990000	7070000	4080000
PX11B_HUMAN	PEX11B	9620000	7630000	10100000	4130000
PAK4_HUMAN	PAK4	7380000	8350000	9400000	8960000
APBA3_HUMAN	APBA3	3390000	2210000	1600000	3940000
ACL6A_HUMAN	ACTL6A	43600000	49900000	37300000	32800000
NSD2_HUMAN	NSD2	1650000			505964
MOC2A_HUMAN	MOCS2	10000000	11800000	9210000	10400000
CYB5_HUMAN	CYB5A	37500000	32300000	68000000	46500000
LDHA_HUMAN	LDHA	2180000000	2000000000	2420000000	1940000000
AL1A1_HUMAN	ALDH1A1	7060000	33100000
DHE3_HUMAN	GLUD1	241000000	310000000	173000000	326000000
DYR_HUMAN	DHFR	87700000	73800000	87900000	74200000
NB5R3_HUMAN	CYB5R3	38900000	66600000	70500000	43300000
GSHR_HUMAN	GSR	104000000	142000000	158000000	185000000
COX2_HUMAN	MT-CO2	5220000	8880000	17600000	17100000
SODC_HUMAN	SOD1	175000000	444000000	442000000	458000000
PNPH_HUMAN	PNP	349000000	333000000	390000000	412000000
HPRT_HUMAN	HPRT1	222000000	194000000	235000000	180000000
AATM_HUMAN	GOT2	391000000	422000000	452000000	541000000
ABL1_HUMAN	ABL1	3900000	3670000	4030000	2900000
EGFR_HUMAN	EGFR	29700000	38600000	37800000	36900000
PGK1_HUMAN	PGK1	1110000000	1110000000	1210000000	1210000000
KAD1_HUMAN	AK1	66000000	61800000	70000000	71100000
THRB_HUMAN	F2		6460000	7270000	3620000
UROK_HUMAN	PLAU		2980000
TPA_HUMAN	PLAT	2380000
ADA_HUMAN	ADA	4360000		9420000	6670000
ATP6_HUMAN	MT-ATP6	18300000	21400000	30600000	13200000
CAH2_HUMAN	CA2	36100000	38100000	53500000	47100000
ASSY_HUMAN	ASS1	64300000	301000000	208000000	188000000
OAS1_HUMAN	OAS1		1650000	1320000	593328
A2MG_HUMAN	A2M	36000000	24700000	56900000	26100000
CO3_HUMAN	C3	7240000	7410000	9240000	2910000
CYTC_HUMAN	CST3	9530000	10500000	13700000	10400000
CYTA_HUMAN	CSTA				412925
KNG1_HUMAN	KNG1	23100000	18000000	48000000	13100000
RASN_HUMAN	NRAS	11100000	10800000	10000000	11200000
RASH_HUMAN	HRAS	2040000	4090000	5290000	6370000
RASK_HUMAN	KRAS	26900000	29100000	35300000	34200000
LDLR_HUMAN	LDLR	2900000	2480000	3120000	2820000
TGFA_HUMAN	TGFA	275656		349428	690686
TGFB1_HUMAN	TGFB1	5120000	2010000	4980000	6090000
THYG_HUMAN	TG	2920000	1340000		2930000
HLAB_HUMAN	HLA-B	1540000	4080000		1740000
HBB_HUMAN;HBD_HUMAN	HBB;HBD	130000000	153000000	204000000	58000000
MYG_HUMAN	MB	3710000	17900000	27100000	19100000
CO2A1_HUMAN	COL2A1			476897
CO4A1_HUMAN	COL4A1
K1C14_HUMAN	KRT14	576906	411656	10800000	9870000
K2C6A_HUMAN	KRT6A	3010000		4730000	11100000
LMNA_HUMAN	LMNA	290000000	291000000	328000000	283000000
LMNA_HUMAN	LMNA	15500000	17600000	25500000	30200000
APOA1_HUMAN	APOA1	25100000	35000000	44100000	14100000
APOE_HUMAN	APOE	7520000	11300000	10800000	9950000
APOC2_HUMAN	APOC2	2950000	4920000	3920000	2280000
APOC3_HUMAN	APOC3	22300000	30600000	35700000	17700000
MBP_HUMAN	MBP	3820000	2460000	6780000	6020000
FABP4_HUMAN;MYP2_HUMAN	FABP4;PMP2
FINC_HUMAN	FN1	5780000	34700000	61600000
FETUA_HUMAN	AHSG	316000000	458000000	714000000	303000000
ALBU_HUMAN	ALB	1830000000	1280000000	2730000000	675000000
FETA_HUMAN	AFP	13100000	4860000	26000000	9220000
VTDB_HUMAN	GC	2450000	1880000	5290000	4040000
TFR1_HUMAN	TFRC	119000000	79500000	78100000	87400000
TRFE_HUMAN	TF	33000000	7730000	45300000	29000000
TRFL_HUMAN	LTF	43300000	17700000	66300000	36400000
HEMO_HUMAN	HPX
FRIL_HUMAN	FTL	29900000	24100000	15700000	24400000
FRIH_HUMAN	FTH1	148000000	107000000	101000000	102000000
MT2_HUMAN	MT2A	58000000	51500000	19300000	105000000
SLPI_HUMAN	SLPI				635702
CATA_HUMAN	CAT	43700000	66400000	46300000	53600000
RAF1_HUMAN	RAF1	7850000	7350000	7960000	6920000
GBA1_HUMAN	GBA1		7230000	3460000	7370000
GBA1_HUMAN	GBA1	32500000	36500000	36200000	38300000
FUCO_HUMAN	FUCA1	89200000	82500000	110000000	105000000
ALDOA_HUMAN	ALDOA	1320000000	865000000	961000000	1040000000
CYTB_HUMAN	CSTB	923000000	774000000	1020000000	1010000000
ANXA1_HUMAN	ANXA1	588000000	1760000000	1090000000	808000000
APOB_HUMAN	APOB	13400000	7270000	11600000	8590000
GCR_HUMAN	NR3C1
PRIO_HUMAN	PRNP	3200000	2780000	5430000	10100000
SODM_HUMAN	SOD2	10700000	10200000	10400000	18500000
OAT_HUMAN	OAT	268000000	232000000	197000000	228000000
KITH_HUMAN	TK1	23500000	23500000	33400000	30900000
THY1_HUMAN	THY1
K2C6B_HUMAN	KRT6B
K2C1_HUMAN	KRT1	86000000	43800000	110000000	510000000
TBB4A_HUMAN	TUBB4A	350000000	427000000	258000000	503000000
G3P_HUMAN	GAPDH	5630000000	4830000000	5190000000	5250000000
G3P_HUMAN	GAPDH	7250000	4940000	5830000	9760000
ARLY_HUMAN	ASL	35600000	30000000	41200000	36200000
HLAA_HUMAN	HLA-A	43200000	39400000	35600000	28200000
ERBB2_HUMAN	ERBB2	7380000	9950000	11400000	7170000
CPNS1_HUMAN	CAPNS1	369000000	424000000	514000000	424000000
HSPB1_HUMAN	HSPB1	3220000000	2360000000	2660000000	2500000000
TYSY_HUMAN	TYMS	8280000	4770000	6150000	6690000
RPN1_HUMAN	RPN1	145000000	144000000	163000000	95200000
RPN2_HUMAN	RPN2	83600000	77100000	93900000	57300000
GNAI2_HUMAN	GNAI2	66700000	54700000	83100000	98000000
B3A2_HUMAN	SLC4A2		989852	647697
AT1A1_HUMAN	ATP1A1	224000000	219000000	268000000	223000000
AT1B1_HUMAN	ATP1B1	58900000	83300000	79700000	74600000
ALDOB_HUMAN;ALDOC_HUMAN	ALDOB;ALDOC	12900000	11900000	12900000	9390000
A4_HUMAN	APP	20700000	28000000	30400000	22300000
ALDH2_HUMAN	ALDH2	71400000	178000000	129000000	177000000
ITB3_HUMAN	ITGB3
ITB2_HUMAN;ITB7_HUMAN	ITGB2;ITGB7	9900000	10800000	5630000	15100000
HMGN1_HUMAN	HMGN1	60000000	63900000	62400000	45200000
PAI2_HUMAN	SERPINB2	44800000	16700000
PAI1_HUMAN	SERPINE1
ADT2_HUMAN	SLC25A5	67400000	105000000	209000000	76000000
ISG15_HUMAN	ISG15	300000000	282000000	333000000	304000000
PCCA_HUMAN	PCCA	11800000	17800000	20800000	20900000
PCCB_HUMAN	PCCB	12200000	15600000	18900000	15900000
PPB1_HUMAN;PPBN_HUMAN	ALPG;ALPP	1080000	638098	949206	705994
IF2A_HUMAN	EIF2S1	294000000	290000000	328000000	317000000
HMGN2_HUMAN	HMGN2	85900000	57500000	81400000	62400000
FGF1_HUMAN	FGF1
ICAM1_HUMAN	ICAM1	12700000	30500000	23400000	25200000
RLA1_HUMAN	RPLP1	92500000	106000000	259000000	244000000
RLA2_HUMAN	RPLP2	510000000	475000000	574000000	626000000
RLA0_HUMAN	RPLP0	223000000	213000000	259000000	280000000
JUN_HUMAN	JUN	1090000		1260000	1030000
RPC4_HUMAN	POLR3D	4750000	5240000	4110000	4480000
TETN_HUMAN	CLEC3B	2290000	1680000	3190000	1640000
LA_HUMAN	SSB	301000000	354000000	323000000	374000000
AT5G1_HUMAN;AT5G2_HUMAN;AT5G3_HUMAN	ATP5MC1;ATP5MC2;ATP5MC3	1300000	819490	984621	394128
ITB1_HUMAN	ITGB1	95500000	119000000	81400000	129000000
K1C18_HUMAN	KRT18	2150000000	2570000000	4160000000	2950000000
K2C8_HUMAN	KRT8	5370000000	5880000000	10300000000	6740000000
MYL1_HUMAN;MYL3_HUMAN	MYL1;MYL3	110000000	98100000	136000000	110000000
DCUP_HUMAN	UROD	91400000	80700000	88100000	92800000
INSR_HUMAN	INSR	420439	406650	476780	556969
CHLE_HUMAN	BCHE
AGAL_HUMAN	GLA	17800000	19200000	16800000	19900000
GELS_HUMAN	GSN	111000000	151000000	265000000	206000000
RB_HUMAN	RB1	34300000	22600000	23800000	17000000
PRGR_HUMAN	PGR	12600000
PTMA_HUMAN	PTMA	720000000	801000000	823000000	635000000
CDK1_HUMAN	CDK1	53000000	44700000	42400000	27600000
ATPB_HUMAN	ATP5F1B	227000000	220000000	274000000	192000000
S10A6_HUMAN	S100A6	1160000000	1280000000	1570000000	1320000000
IF4E_HUMAN	EIF4E	85600000	91800000	97800000	105000000
ENOA_HUMAN	ENO1	3670000000	3090000000	3670000000	3460000000
ENOA_HUMAN	ENO1	10100000	10600000	17200000	6900000
PYGL_HUMAN	PYGL	1870000	4660000	9070000	4400000
G6PI_HUMAN	GPI	918000000	760000000	934000000	981000000
DPOLB_HUMAN	POLB	9220000	11000000	11000000	8930000
NPM_HUMAN	NPM1	1280000000	1110000000	1090000000	1340000000
TPM3_HUMAN	TPM3	1640000000	1250000000	1800000000	1640000000
ITAV_HUMAN	ITGAV	30500000	28700000	24000000	28400000
HEXA_HUMAN	HEXA	18600000	25200000	31900000	31600000
GDN_HUMAN	SERPINE2	38100000		92200000	69800000
HYEP_HUMAN	EPHX1	202000000	149000000	197000000	126000000
ACBP_HUMAN	DBI	678000000	620000000	736000000	692000000
LDHB_HUMAN	LDHB	3080000000	2870000000	2930000000	3030000000
CENPB_HUMAN	CENPB	1880000	1920000	1240000	1250000
GPX1_HUMAN	GPX1	16300000	15600000	21800000	28400000
PGK2_HUMAN	PGK2	49400000	40100000	36000000	55700000
PROS_HUMAN	PROS1	927910			811225
PDIA1_HUMAN	P4HB	608000000	731000000	731000000	629000000
H10_HUMAN	H1-0	11300000	33800000	30700000	29500000
ACYP1_HUMAN	ACYP1	22600000	24500000	30900000	23600000
CATD_HUMAN	CTSD	412000000	473000000	399000000	466000000
ANXA2_HUMAN	ANXA2	1460000000	1350000000	1960000000	1450000000
CAN1_HUMAN	CAPN1	426000000	434000000	573000000	432000000
TBB5_HUMAN	TUBB	4270000000	3600000000	3780000000	3660000000
MT1B_HUMAN	MT1B	419639			435953
SAP_HUMAN	PSAP	32100000	119000000	90500000	129000000
HEXB_HUMAN	HEXB	127000000	181000000	154000000	163000000
CATL1_HUMAN	CTSL	27600000	45200000	35200000	43000000
PROF1_HUMAN	PFN1	3150000000	2720000000	3270000000	2730000000
PMGE_HUMAN	BPGM	2630000	3370000	2690000	3490000
APT_HUMAN	APRT	358000000	239000000	245000000	316000000
SYEP_HUMAN	EPRS1	258000000	280000000	284000000	298000000
CATB_HUMAN	CTSB	67100000	129000000	120000000	128000000
HS90A_HUMAN	HSP90AA1	5500000000	4290000000	4320000000	3870000000
GALT_HUMAN	GALT	11900000	9410000	13800000	11900000
HNRPC_HUMAN	HNRNPC	518000000	367000000	269000000	394000000
QCR6_HUMAN	UQCRH	2820000	8720000	9940000	9300000
LAMB1_HUMAN	LAMB1	34200000	43900000	46800000	33400000
YES_HUMAN	YES1	60900000	77300000	73000000	91200000
TPM2_HUMAN	TPM2
TPM2_HUMAN	TPM2	334000000	263000000	421000000	262000000
FUMH_HUMAN	FH	259000000	258000000	149000000	258000000
ERCC1_HUMAN	ERCC1	5750000	5660000	6670000	6160000
TSP1_HUMAN	THBS1	6760000	5920000	5490000	4470000
SP1_HUMAN	SP1	8770000	10600000	10800000	7750000
IGF1R_HUMAN	IGF1R	3150000	2600000
ANXA6_HUMAN	ANXA6	42400000	31300000	73700000	47400000
RHOC_HUMAN	RHOC	292000000	330000000	345000000	358000000
DAF_HUMAN	CD55	6790000	9700000	7850000	19900000
MDR1_HUMAN	ABCB1	5620000	4280000	1720000	5600000
4F2_HUMAN	SLC3A2	225000000	246000000	281000000	213000000
BGLR_HUMAN	GUSB	1680000	1790000	1990000	1300000
PFKAM_HUMAN	PFKM	63800000	61600000	62500000	66300000
HS90B_HUMAN	HSP90AB1	3940000000	2910000000	3070000000	3050000000
SRPRA_HUMAN	SRPRA	41000000	70100000	52000000	39200000
ASNS_HUMAN	ASNS	163000000	165000000	180000000	189000000
MMP2_HUMAN	MMP2	8220000	28600000
SODE_HUMAN	SOD3
HEM3_HUMAN	HMBS	29400000	53900000	57600000	64900000
NEP_HUMAN	MME				727267
INHBA_HUMAN	INHBA
ODPA_HUMAN	PDHA1	34600000	35500000	42000000	38800000
CO4A2_HUMAN	COL4A2
CY1_HUMAN	CYC1	7680000	9700000	17600000	6550000
RU2B_HUMAN	SNRPB2	41200000	43400000	34200000	38400000
MET_HUMAN	MET	18500000	17800000	18800000	15600000
CFAH_HUMAN	CFH			1020000
RU17_HUMAN	SNRNP70	98200000	95500000	73000000	58400000
ITA5_HUMAN	ITGA5	82800000	92500000	117000000	81000000
NFIC_HUMAN	NFIC	20700000	18600000	18200000	16700000
VIME_HUMAN	VIM	59000000	33700000
A2AP_HUMAN	SERPINF2			7000000
RS17_HUMAN	RPS17	91100000	81800000	118000000	163000000
K1C19_HUMAN	KRT19	553000000	746000000	1390000000	863000000
GNAI3_HUMAN	GNAI3	23300000	22300000	34300000	37800000
ANXA5_HUMAN	ANXA5	555000000	476000000	647000000	585000000
K1C16_HUMAN	KRT16	3650000	40900000	1740000	1660000
RSSA_HUMAN	RPSA	277000000	258000000	317000000	361000000
CD63_HUMAN	CD63	57200000	50600000	44300000	38900000
RM03_HUMAN	MRPL3	25700000	20400000	24500000	21900000
SNRPA_HUMAN	SNRPA	131000000	119000000	96300000	90200000
FGF2_HUMAN	FGF2	2840000		3180000	1510000
ENOG_HUMAN	ENO2	9190000	10600000	8230000	8530000
THIK_HUMAN	ACAA1	109000000	178000000	143000000	188000000
SRP19_HUMAN	SRP19	30600000	30700000	34700000	31000000
GSTP1_HUMAN	GSTP1	2630000000	3110000000	3230000000	3180000000
RU1C_HUMAN	SNRPC	70000000	83800000	53700000	77900000
LEG1_HUMAN	LGALS1	33700000	66700000	81800000	53600000
DHPR_HUMAN	QDPR	61200000	46000000	50600000	63400000
HMGB1_HUMAN	HMGB1	1830000000	1650000000	1840000000	1790000000
RET1_HUMAN	RBP1
F16P1_HUMAN	FBP1	691891	948413	866925	618201
SPRC_HUMAN	SPARC
GSTM1_HUMAN	GSTM1	359629			1920000
TPM1_HUMAN	TPM1	204000000	152000000	185000000	208000000
TPM1_HUMAN	TPM1	123000000	99000000	186000000	123000000
TPM1_HUMAN	TPM1	14300000		1980000	1460000
CLCA_HUMAN	CLTA	183000000	182000000	183000000	197000000
CLCB_HUMAN	CLTB	125000000	154000000	161000000	136000000
ANXA4_HUMAN	ANXA4	163000000	287000000	363000000	284000000
CN37_HUMAN	CNP	55500000	59500000	60000000	51900000
HMOX1_HUMAN	HMOX1	2550000	4870000	5270000	4010000
PGFRB_HUMAN	PDGFRB
DLDH_HUMAN	DLD	88400000	109000000	110000000	138000000
HXB7_HUMAN	HOXB7	357882	1100000	552775	380485
ROA1_HUMAN	HNRNPA1	783000000	672000000	658000000	629000000
RU2A_HUMAN	SNRPA1	119000000	120000000	92300000	91200000
CATH_HUMAN	CTSH	8830000	17100000	21600000	14500000
COX6C_HUMAN	COX6C	4170000	5820000	11600000	7960000
TACD2_HUMAN	TACSTD2	17000000	25100000	38500000	29700000
PARP1_HUMAN	PARP1	176000000	165000000	168000000	118000000
DPOLA_HUMAN	POLA1	8390000	7160000	6170000	3920000
IFIT2_HUMAN	IFIT2		921596
IFIT1_HUMAN	IFIT1	918709	906860	677467	7470000
UCHL1_HUMAN	UCHL1			68300000
FURIN_HUMAN	FURIN	1790000		2030000	2060000
LKHA4_HUMAN	LTA4H	172000000	187000000	192000000	200000000
CO4A_HUMAN	C4A	1940000	2010000	4530000	1880000
H2AV_HUMAN;H2AZ_HUMAN	H2AZ1;H2AZ2	227000000	140000000	133000000	146000000
FBSP1_HUMAN	FBXO45	1700000	1920000	2360000	1320000
CISD3_HUMAN	CISD3	8480000	4350000	5170000	9830000
ATX1L_HUMAN	ATXN1L	852417	748212
JMJD7_HUMAN	JMJD7	575231	1530000	1350000	1390000
MYZAP_HUMAN	MYZAP	26700000		25000000	15400000
GRL1A_HUMAN	POLR2M	8940000	8080000	8140000	7930000
DERPC_HUMAN	DERPC	7460000	5740000	4400000	5670000
CTF8_HUMAN	CHTF8	8340000	11000000	8880000	8770000
GSTT2_HUMAN	GSTT2B	24800000	19200000	20500000	21800000
TPC2A_HUMAN;TPC2B_HUMAN	TRAPPC2;TRAPPC2B	3320000	4050000	4800000	4560000
NARR_HUMAN	RAB34				956159
CH088_HUMAN	C8orf88
ST1A3_HUMAN;ST1A4_HUMAN	SULT1A3;SULT1A4		9570000	10200000	6270000
HS71A_HUMAN;HS71B_HUMAN	HSPA1A;HSPA1B	376000000	264000000	322000000	388000000
CALM1_HUMAN;CALM2_HUMAN;CALM3_HUMAN	CALM1;CALM2;CALM3	1850000000	1860000000	2150000000	1930000000
ERPG3_HUMAN	ERCC6	5530000	7260000	4180000	4740000
RPAC2_HUMAN	POLR1D	32300000	35700000	30600000	37200000
ECE2_HUMAN	ECE2	4640000			13500000
TBA1A_HUMAN;TBA3C_HUMAN;TBA3D_HUMAN;TBA3E_HUMAN	TUBA1A;TUBA3C;TUBA3D;TUBA3E
ZTRF1_HUMAN	ZFTRAF1	11200000	14100000	8770000	14500000
ADX_HUMAN	FDX1	48100000	48400000	32300000	46200000
SRGN_HUMAN	SRGN
RO60_HUMAN	RO60	47700000	41300000	26500000	49600000
LYAG_HUMAN	GAA	37400000	52700000	39400000	50300000
RARA_HUMAN	RARA
RRAS_HUMAN	RRAS	12200000	9160000	18200000	17600000
HLAC_HUMAN	HLA-C	25600000	24100000	16000000	16400000
ARAF_HUMAN	ARAF	25600000	22200000	24000000	26300000
ODP2_HUMAN	DLAT	37800000	54600000	57800000	44200000
PTPRF_HUMAN	PTPRF	2250000	2330000	2900000	3290000
NR2F6_HUMAN	NR2F6	3350000	5220000	4130000	3330000
COT1_HUMAN	NR2F1		17500000
THIO_HUMAN	TXN	3130000000	2600000000	3630000000	3140000000
COX5B_HUMAN	COX5B	32300000	20200000	47400000	37300000
PPGB_HUMAN	CTSA	86400000	73000000	72400000	83000000
MGST1_HUMAN	MGST1	10600000	11700000	25500000	16900000
TAU_HUMAN	MAPT		478649		551984
KAP0_HUMAN	PRKAR1A	71700000	40100000	50600000	41100000
HEM4_HUMAN	UROS	6180000	4520000	5730000	6710000
ESTD_HUMAN	ESD	159000000	155000000	165000000	202000000
CH60_HUMAN	HSPD1	2120000000	1860000000	2360000000	2380000000
CLUS_HUMAN	CLU	48100000	26700000	29800000	20900000
BIP_HUMAN	HSPA5	4230000000	5190000000	5870000000	4120000000
LAMC1_HUMAN	LAMC1	12900000	23000000	22000000	18100000
PPAL_HUMAN	ACP2	13400000	14000000	12000000	11900000
MTAP2_HUMAN	MAP2	9190000	10800000	6570000	5840000
MTAP2_HUMAN	MAP2	25300000	36100000	18300000	14700000
HSP7C_HUMAN	HSPA8	3020000000	2730000000	3040000000	2460000000
GTR1_HUMAN	SLC2A1	124000000	60400000	129000000	100000000
GTR3_HUMAN	SLC2A3	30700000	25900000	15300000	12400000
EPB41_HUMAN	EPB41	11500000	9320000	10800000	9740000
UMPS_HUMAN	UMPS	95000000	88000000	88600000	84900000
ODPB_HUMAN	PDHB	59500000	66200000	74700000	59100000
ODB2_HUMAN	DBT	40600000	47100000	61300000	48100000
PYGB_HUMAN	PYGB	14500000	18200000	24800000	16200000
RALA_HUMAN	RALA	9700000	5420000	10000000	14600000
RALB_HUMAN	RALB	37600000	31100000	51700000	43600000
BCR_HUMAN	BCR	5030000	5350000	5100000	5480000
LAMP1_HUMAN	LAMP1	7150000	8780000	6380000	5800000
ACADM_HUMAN	ACADM	31200000	30600000	48100000	35000000
TOP1_HUMAN	TOP1	87100000	88200000	83800000	78800000
TOP2A_HUMAN	TOP2A	12600000	13700000	14300000	5540000
G6PD_HUMAN	G6PD	350000000	249000000	345000000	392000000
UBL4A_HUMAN	UBL4A	15500000	20700000	21100000	20000000
ERR1_HUMAN	ESRRA	2190000	1430000	2020000	2270000
PYC_HUMAN	PC	34700000	25400000	36000000	24800000
DMD_HUMAN	DMD	4080000	3270000	2410000	1870000
C1TC_HUMAN	MTHFD1	314000000	309000000	324000000	299000000
MPRI_HUMAN	IGF2R	17900000	20100000	18700000	19900000
ADHX_HUMAN	ADH5	155000000	177000000	190000000	239000000
CDK4_HUMAN	CDK4	37600000	15800000	24800000	35800000
PRPS2_HUMAN	PRPS2	96000000	106000000	107000000	103000000
PABP1_HUMAN	PABPC1	338000000	292000000	271000000	316000000
PCNA_HUMAN	PCNA	892000000	502000000	576000000	539000000
HARS1_HUMAN	HARS1	109000000	114000000	136000000	124000000
ADT1_HUMAN	SLC25A4	1830000	2530000	5170000	1490000
ADT3_HUMAN	SLC25A6	7270000	19500000	34600000	14500000
FA5_HUMAN	F5
IMDH2_HUMAN	IMPDH2	323000000	224000000	283000000	285000000
TPR_HUMAN	TPR	32700000	28200000	20000000	23400000
KCRB_HUMAN	CKB		13000000		5760000
ANXA3_HUMAN	ANXA3	394000000	432000000	542000000	466000000
BMP4_HUMAN	BMP4	3580000	3350000	2890000	2760000
ODBA_HUMAN	BCKDHA	18500000	17600000	19300000	16800000
ACTN1_HUMAN	ACTN1	286000000	228000000	383000000	256000000
ACE_HUMAN	ACE	13500000	24500000	18500000	20300000
CADH1_HUMAN	CDH1	137000000	162000000	210000000	171000000
SRC_HUMAN	SRC	11800000	23000000	26900000	23500000
PEPD_HUMAN	PEPD	71600000	49900000	38000000	50400000
XRCC6_HUMAN	XRCC6	599000000	615000000	621000000	555000000
XRCC5_HUMAN	XRCC5	563000000	549000000	566000000	569000000
UNG_HUMAN	UNG	3460000	13600000	18800000	12400000
COX41_HUMAN	COX4I1	111000000	43900000	59500000	47200000
HEM1_HUMAN	ALAS1	1990000	1950000		1700000
GILT_HUMAN	IFI30	5510000	5290000	8210000	9780000
LAMP2_HUMAN	LAMP2	76900000	74500000	69900000	60200000
LAMP2_HUMAN	LAMP2	14500000	17700000	12700000	10400000
RINI_HUMAN	RNH1	523000000	583000000	476000000	553000000
BMP1_HUMAN	BMP1
CY24A_HUMAN	CYBA	17500000	16000000	25700000	30900000
CSPG2_HUMAN	VCAN
ITA4_HUMAN	ITGA4
AT1A3_HUMAN	ATP1A3	30300000	60100000	61000000	70300000
EF2_HUMAN	EEF2	1150000000	753000000	970000000	1030000000
K1C10_HUMAN	KRT10	205000000	174000000	205000000	1510000000
K1C13_HUMAN	KRT13	356000000	680000000	1020000000	534000000
K2C5_HUMAN	KRT5	2000000	1970000	4730000	7240000
PDIA4_HUMAN	PDIA4	446000000	637000000	781000000	545000000
P4HA1_HUMAN	P4HA1	37900000	33400000	37100000	31200000
P4HA1_HUMAN	P4HA1	5490000			4620000
TCTP_HUMAN	TPT1	489000000	604000000	774000000	887000000
HEM2_HUMAN	ALAD	6910000	9830000	10500000	8780000
TF_HUMAN	F3	19000000	7920000	10500000	12300000
PLST_HUMAN	PLS3	129000000	163000000	161000000	154000000
ACPH_HUMAN	APEH	251000000	144000000	181000000	201000000
ETFA_HUMAN	ETFA	214000000	257000000	288000000	287000000
GYS1_HUMAN	GYS1	6360000	6010000	5910000	4620000
KAP2_HUMAN	PRKAR2A	46400000	64100000	67100000	56700000
ENOB_HUMAN	ENO3	40400000	14100000	28500000	20900000
T2FB_HUMAN	GTF2F2	51600000	53300000	45600000	53600000
CD59_HUMAN	CD59	25200000	20400000	41100000	72100000
MTDC_HUMAN	MTHFD2	175000000	99900000	137000000	112000000
MIF_HUMAN	MIF	2780000000	2480000000	2380000000	2760000000
CD99_HUMAN	CD99	57800000	84500000	105000000	71700000
HGF_HUMAN	HGF	6730000	4060000	7810000
GLU2B_HUMAN	PRKCSH	609000000	614000000	797000000	603000000
IRF2_HUMAN	IRF2	2560000	3430000	3040000	2700000
FPPS_HUMAN	FDPS	273000000	239000000	310000000	259000000
CX7A2_HUMAN	COX7A2			17100000	8470000
AK1A1_HUMAN	AKR1A1	81000000	174000000	149000000	141000000
KPYM_HUMAN	PKM	2250000000	1960000000	2300000000	2080000000
KPYM_HUMAN	PKM	1350000000	1240000000	1490000000	1450000000
ACYP2_HUMAN	ACYP2	14600000	16500000	17700000	16900000
ENPL_HUMAN	HSP90B1	1880000000	2470000000	158000000	1990000000
CCNB1_HUMAN	CCNB1	7250000	7050000	7300000	6390000
MYL6B_HUMAN	MYL6B	9310000	11800000	15700000	17700000
RSMB_HUMAN;RSMN_HUMAN	SNRPB;SNRPN	209000000	208000000	163000000	186000000
IDE_HUMAN	IDE	77800000	73200000	70300000	82100000
CX6B1_HUMAN	COX6B1	15300000	25900000	30700000	39400000
PO2F1_HUMAN	POU2F1	4430000	6510000	6590000	5550000
HNRPL_HUMAN	HNRNPL	286000000	257000000	209000000	191000000
SYDC_HUMAN	DARS1	240000000	243000000	238000000	262000000
ETS1_HUMAN	ETS1
PLAK_HUMAN	JUP	46200000	77000000	92800000	80700000
QCR7_HUMAN	UQCRB	13000000	16500000	24300000	10800000
BRAF_HUMAN	BRAF	4530000	3760000	4150000	4110000
GLNA_HUMAN	GLUL	23800000	49300000	39100000	52800000
ALDR_HUMAN	AKR1B1		1680000
PVR_HUMAN	PVR	93500000	99400000	104000000	99000000
RAC2_HUMAN	RAC2	15000000	15500000	14300000	17600000
ERF3A_HUMAN	GSPT1	253000000	200000000	203000000	233000000
INGR1_HUMAN	IFNGR1	10500000	15600000	10800000	10400000
ARSA_HUMAN	ARSA	5570000	10200000	10400000	13200000
B4GT1_HUMAN	B4GALT1	13700000	15800000	14100000	12000000
PPAP_HUMAN	ACP3	823085	3750000		1670000
EZRI_HUMAN	EZR	1470000000	1510000000	2030000000	1690000000
ATF2_HUMAN	ATF2	1740000	1530000	1780000	2010000
UCHL3_HUMAN	UCHL3	154000000	178000000	170000000	183000000
FOSL1_HUMAN	FOSL1	2040000		1880000	2750000
FOSL2_HUMAN	FOSL2	4910000	5900000	5450000	3650000
PGDH_HUMAN	HPGD	10500000	58000000	26900000	34400000
AREG_HUMAN	AREG	2960000	932855	1010000	2700000
MCP_HUMAN	CD46	44300000	74900000	61500000	46200000
MCP_HUMAN	CD46	82500000	102000000	110000000	130000000
NDKA_HUMAN	NME1	2120000000	1550000000	1900000000	1980000000
NQO1_HUMAN	NQO1	165000000	141000000	110000000	168000000
GNS_HUMAN	GNS	95800000	131000000	125000000	106000000
PHKG2_HUMAN	PHKG2
ARSB_HUMAN	ARSB	4040000	4480000	3970000	4090000
RS2_HUMAN	RPS2	179000000	153000000	183000000	280000000
TFE2_HUMAN	TCF3	1110000	2020000	1660000	1340000
DESP_HUMAN	DSP	79400000	91900000	115000000	81900000
RFA2_HUMAN	RPA2	58500000	56900000	74100000	62800000
TIMP2_HUMAN	TIMP2	2140000	2080000	3650000	3370000
CD44_HUMAN	CD44	14200000	78100000	44300000	43500000
NQO2_HUMAN	NQO2	22600000	24800000	23500000	29300000
H2AX_HUMAN	H2AX	1850000000	1470000000	1290000000	1220000000
ITB4_HUMAN	ITGB4	38000000	45000000	56900000	48500000
CBR1_HUMAN	CBR1	179000000	209000000	199000000	218000000
ACADS_HUMAN	ACADS	7930000	13200000	17000000	11200000
CREB1_HUMAN	CREB1	24700000	24100000	21100000	18200000
BGAL_HUMAN	GLB1	67000000	116000000	78900000	102000000
PP2BB_HUMAN	PPP3CB	1300000	1330000		1080000
NCK1_HUMAN	NCK1	16000000	21200000	14800000	18200000
GCFC2_HUMAN	GCFC2	3290000	3880000	4010000	2980000
H15_HUMAN	H1-5	257000000	191000000	213000000	248000000
H12_HUMAN	H1-2	609000000	509000000	632000000	496000000
EPCAM_HUMAN	EPCAM	219000000	269000000	240000000	344000000
NCPR_HUMAN	POR	68000000	92900000	91700000	60200000
MGMT_HUMAN	MGMT	26000000	23000000	25500000	20200000
FER_HUMAN	FER
AT2A2_HUMAN	ATP2A2	46000000	47000000	54000000	44500000
PLCG2_HUMAN	PLCG2	1910000	2620000	2650000	2420000
FAAA_HUMAN	FAH	13400000	15300000	28600000	22800000
STMN1_HUMAN	STMN1	636000000	495000000	476000000	287000000
YBOX3_HUMAN	YBX3	9060000	4260000	10200000	8680000
YBOX3_HUMAN	YBX3	52000000	37500000	48200000	52200000
ZNF24_HUMAN	ZNF24	6070000	5320000	3720000	3840000
ZKSC1_HUMAN	ZKSCAN1	6500000	9820000	6020000	5270000
ZNF3_HUMAN	ZNF3
NAGAB_HUMAN	NAGA	21400000	40700000	30800000	39800000
HSP76_HUMAN	HSPA6
HMGA1_HUMAN	HMGA1	426000000	173000000	385000000	411000000
TMM11_HUMAN	TMEM11	1700000	1760000	2470000
AATC_HUMAN	GOT1	185000000	166000000	182000000	211000000
KPCA_HUMAN	PRKCA	3900000	4960000	3040000	3620000
JUNB_HUMAN	JUNB	8180000	8430000	8680000	9790000
ITA2_HUMAN	ITGA2	19400000	38400000	24300000	29700000
CXA1_HUMAN	GJA1
ASM_HUMAN	SMPD1	7110000	9020000	7080000	6890000
UBF1_HUMAN	UBTF	20200000	19900000	17700000	19500000
HXB8_HUMAN	HOXB8	2610000	6020000	3610000	3680000
HXB9_HUMAN	HOXB9	20500000	47000000	37000000	22000000
HXB6_HUMAN	HOXB6	1010000	4920000	3890000	3070000
JUND_HUMAN	JUND	8400000	3520000	9760000	8700000
ATF7_HUMAN	ATF7	1600000	2120000	2290000	2280000
KAPCA_HUMAN	PRKACA	62000000	48400000	51800000	49000000
CAN2_HUMAN	CAPN2	56800000	49100000	73000000	75000000
CEBPB_HUMAN	CEBPB	4930000	7740000	5330000	5510000
PTN2_HUMAN	PTPN2	10300000	10200000	10500000	10700000
DCAM_HUMAN	AMD1	298935		351338	640231
PYRG1_HUMAN	CTPS1	76100000	63700000	64900000	69800000
DDX5_HUMAN	DDX5	140000000	111000000	108000000	93100000
PFKAL_HUMAN	PFKL	193000000	206000000	207000000	196000000
SAP3_HUMAN	GM2A	3020000	7210000	8540000	4220000
LEG3_HUMAN	LGALS3	612000000	825000000	1130000000	1250000000
IBP3_HUMAN	IGFBP3
PRS6A_HUMAN	PSMC3	145000000	136000000	134000000	149000000
TCPA_HUMAN	TCP1	436000000	381000000	406000000	425000000
PTN1_HUMAN	PTPN1	30300000	29400000	48000000	26200000
IBP2_HUMAN	IGFBP2	1600000	2150000	2520000	3110000
ERCC2_HUMAN	ERCC2	11900000	9150000	7850000	9950000
RL35A_HUMAN	RPL35A	81200000	68700000	94800000	122000000
ITB5_HUMAN	ITGB5	44700000	28400000	29300000	48400000
ARF4_HUMAN	ARF4	777000000	750000000	836000000	788000000
RL7_HUMAN	RPL7	119000000	121000000	163000000	189000000
VINC_HUMAN	VCL	331000000	371000000	507000000	408000000
PTPRA_HUMAN	PTPRA	6570000	3180000	3500000	4410000
ARY1_HUMAN	NAT1	8820000	15300000	14000000	14000000
SON_HUMAN	SON	14700000	10400000	8670000	6410000
NELFE_HUMAN	NELFE	31500000	34200000	30600000	28600000
RL17_HUMAN	RPL17	133000000	110000000	164000000	216000000
PGAM1_HUMAN	PGAM1	1270000000	1060000000	1230000000	1370000000
RCC1_HUMAN	RCC1	141000000	159000000	150000000	145000000
SDC1_HUMAN	SDC1			16200000	34500000
ATF1_HUMAN	ATF1	408259	699169	280804	248499
ATF6A_HUMAN	ATF6	88559.4	109795	84786.4	59040.8
DNLI1_HUMAN	LIG1	18300000	9550000	9340000	7540000
ATP5J_HUMAN	ATP5PF	19300000	21400000	30500000	8680000
XRCC1_HUMAN	XRCC1	23800000	22000000	22300000	15400000
K2C4_HUMAN	KRT4			4840000
AMD_HUMAN	PAM
CADH2_HUMAN	CDH2				33700000
TSN8_HUMAN	TSPAN8	42600000	33400000	30900000	24600000
PLCG1_HUMAN	PLCG1	13200000	14700000	16100000	11800000
UD16_HUMAN	UGT1A6	26300000	39000000	24700000	20900000
LFA3_HUMAN	CD58	7600000	8420000	8740000	5580000
NUCL_HUMAN	NCL	1240000000	1300000000	1240000000	1190000000
HXK1_HUMAN	HK1	71800000	87400000	99400000	89400000
RPB3_HUMAN	POLR2C	30700000	27900000	29300000	25500000
RPAB1_HUMAN	POLR2E	50500000	46000000	48700000	43500000
NDUV2_HUMAN	NDUFV2	24400000	19700000	27300000	16300000
GGT1_HUMAN	GGT1		38900000	42000000	34000000
ERCC3_HUMAN	ERCC3	6570000	6430000	5980000	5060000
RO52_HUMAN	TRIM21	22000000	22400000	21500000	25600000
E2AK2_HUMAN	EIF2AK2	72900000	73000000	78900000	62600000
TFE3_HUMAN	TFE3	3490000	2040000	2830000	5360000
SPEE_HUMAN	SRM	123000000	101000000	99100000	112000000
SL9A1_HUMAN	SLC9A1	4500000	4140000	4910000	3700000
CSK22_HUMAN	CSNK2A2	47800000	52700000	47900000	52200000
RXRA_HUMAN	RXRA	2270000	2090000	2150000	1500000
ITIH2_HUMAN	ITIH2	8200000	4150000	15800000	5720000
NFKB1_HUMAN	NFKB1	34800000	28700000	33200000	30000000
FST_HUMAN	FST
AT2B1_HUMAN	ATP2B1	68400000	74000000	41700000	79900000
IF2B_HUMAN	EIF2S2	193000000	208000000	223000000	218000000
ANXA7_HUMAN	ANXA7	86300000	139000000	106000000	125000000
TBP_HUMAN	TBP	7590000	6740000	5140000	6590000
CCNA2_HUMAN	CCNA2	3480000	4390000	4060000	3650000
BTF3_HUMAN	BTF3	213000000	154000000	177000000	227000000
BTF3_HUMAN	BTF3	285310
RAB3A_HUMAN	RAB3A		566785
RAB3B_HUMAN	RAB3B	9710000	4050000	13000000	6990000
RAB4A_HUMAN	RAB4A	19300000	14400000	23500000	22400000
RAB5A_HUMAN	RAB5A	36000000	39700000	41800000	29300000
RAB6A_HUMAN	RAB6A	146000000	191000000	147000000	170000000
MSH3_HUMAN	MSH3	33300000	36800000	30500000	32800000
PSB1_HUMAN	PSMB1	229000000	222000000	260000000	237000000
MPRD_HUMAN	M6PR	46600000	43200000	56700000	53500000
COX5A_HUMAN	COX5A	64900000	22900000	31600000	22600000
LMNB1_HUMAN	LMNB1	16000000	16100000	11800000	7290000
HXA5_HUMAN	HOXA5			1350000	1540000
PZP_HUMAN	PZP	5880000	2980000	11500000	6160000
ICAL_HUMAN	CAST	69400000	123000000	131000000	116000000
IMDH1_HUMAN	IMPDH1	269000000	222000000	250000000	234000000
FILA_HUMAN	FLG
RASA1_HUMAN	RASA1	4700000	4970000	4950000	4930000
PTMS_HUMAN	PTMS	240000000	224000000	175000000	169000000
CD11B_HUMAN	CDK11B	31800000	32700000	22900000	29400000
GSTM3_HUMAN	GSTM3	628000000	665000000	566000000	835000000
VATB2_HUMAN	ATP6V1B2	65200000	80400000	80700000	83600000
VATC1_HUMAN	ATP6V1C1	61500000	60300000	60800000	69400000
CSRP1_HUMAN	CSRP1	216000000	169000000	220000000	194000000
FLNA_HUMAN	FLNA	716000000	694000000	1050000000	813000000
NF1_HUMAN	NF1	32000000	42300000	29500000	36600000
ACOHC_HUMAN	ACO1	61000000	71400000	69100000	69200000
SYT1_HUMAN	SYT1
SCF_HUMAN	KITLG	2710000			3040000
5NTD_HUMAN	NT5E	13900000	3850000	17300000	29300000
TAF1L_HUMAN;TAF1_HUMAN	TAF1;TAF1L			40900000	32700000
VDAC1_HUMAN	VDAC1	14100000	21000000	40900000	30300000
ERBB3_HUMAN	ERBB3		204989		299451
SDHB_HUMAN	SDHB	18200000	24100000	25800000	13000000
CD9_HUMAN	CD9	145000000	211000000	226000000	176000000
ODBB_HUMAN	BCKDHB	11600000	12800000	13800000	15600000
COMT_HUMAN	COMT	176000000	286000000	262000000	269000000
TGM2_HUMAN	TGM2				145000000
MUTA_HUMAN	MMUT	22700000	20300000	16800000	27200000
OSBP1_HUMAN	OSBP	95800000	117000000	114000000	109000000
PIMT_HUMAN	PCMT1	104000000	117000000	119000000	120000000
FBRL_HUMAN	FBL	22200000	28300000	17600000	14900000
PUR2_HUMAN	GART	196000000	180000000	194000000	204000000
PUR6_HUMAN	PAICS	379000000	380000000	353000000	379000000
IDS_HUMAN	IDS	4410000		2530000	3080000
SCP2_HUMAN	SCP2	178000000	210000000	189000000	202000000
UD11_HUMAN	UGT1A1	1220000	1110000	2460000	5130000
UBA1_HUMAN	UBA1	478000000	492000000	502000000	533000000
NDKB_HUMAN	NME2	1610000000	1290000000	1490000000	1680000000
ENPP1_HUMAN	ENPP1	2640000	1730000		2570000
USF1_HUMAN	USF1	1840000	2740000		3110000
ADRO_HUMAN	FDXR	124000000	42300000	80700000	113000000
ROA2_HUMAN	HNRNPA2B1	656000000	556000000	525000000	505000000
RFX1_HUMAN	RFX1	5640000	5700000	4970000	4820000
CBL_HUMAN	CBL	9400000	21100000	19300000	15400000
KAPCB_HUMAN	PRKACB	7460000	9620000	11200000	10900000
QCR2_HUMAN	UQCRC2	10900000	14900000	24400000	12300000
HEMH_HUMAN	FECH	30800000	36700000	37500000	40000000
XPA_HUMAN	XPA				1610000
TCEA1_HUMAN	TCEA1	47200000	63400000	55000000	56700000
ITA6_HUMAN	ITGA6	48000000	40300000	62400000	59400000
SFPQ_HUMAN	SFPQ	595000000	490000000	483000000	488000000
TBG1_HUMAN	TUBG1	27000000	23600000	25800000	25300000
PPIB_HUMAN	PPIB	1150000000	1240000000	1330000000	1260000000
MAOM_HUMAN	ME2	102000000	94700000	120000000	118000000
SYWC_HUMAN	WARS1	390000000	414000000	540000000	576000000
RS3_HUMAN	RPS3	183000000	188000000	210000000	275000000
GCSH_HUMAN	GCSH	27800000	37300000	33900000	42900000
KS6B1_HUMAN	RPS6KB1	4300000	6330000	4730000	6130000
JAK1_HUMAN	JAK1	1730000	1410000	1450000	1560000
PTPRB_HUMAN	PTPRB				2040000
PTPRE_HUMAN	PTPRE
SP100_HUMAN	SP100	9030000	10800000	8610000	10100000
CRCM_HUMAN	MCC
NFYA_HUMAN	NFYA	3460000	5400000	2850000	3120000
SAHH_HUMAN	AHCY	433000000	393000000	432000000	418000000
COF1_HUMAN	CFL1	3230000000	3210000000	3230000000	3370000000
IF4B_HUMAN	EIF4B	161000000	152000000	159000000	152000000
HAP40_HUMAN	F8A3	8660000	9780000	13600000	10900000
AT2B4_HUMAN	ATP2B4	3290000	2930000	3510000	6750000
DGKA_HUMAN	DGKA		2730000	6300000	3500000
CPT2_HUMAN	CPT2	43400000	51900000	60400000	51800000
KTHY_HUMAN	DTYMK	132000000	98300000	121000000	112000000
RIR1_HUMAN	RRM1	166000000	69700000	78200000	47400000
CCND1_HUMAN	CCND1	13200000	4980000	7710000	8850000
RAE1_HUMAN	CHM	3400000	3330000	4780000	4320000
ERD21_HUMAN	KDELR1	12500000	7100000	10700000	7750000
COT2_HUMAN	NR2F2	35300000	18400000	19500000	19200000
EF1B_HUMAN	EEF1B2	1280000000	1200000000	1320000000	1130000000
AT5F1_HUMAN	ATP5PB	136000000	133000000	203000000	76500000
PPAC_HUMAN	ACP1	101000000	116000000	132000000	104000000
THIL_HUMAN	ACAT1	596000000	439000000	492000000	478000000
MYL9_HUMAN	MYL9	247000000	315000000	516000000	298000000
RPB1_HUMAN	POLR2A	28400000	31700000	25700000	24200000
CDK2_HUMAN	CDK2	19700000	13200000	17400000	11700000
APC_HUMAN	APC	1750000	1390000	1490000	1190000
ARBK1_HUMAN	GRK2	18600000	15100000	16000000	15200000
PAR1_HUMAN	F2R
MCM3_HUMAN	MCM3	190000000	168000000	143000000	113000000
NFYB_HUMAN	NFYB	19000000	15700000	18600000	16900000
THTM_HUMAN	MPST	66600000	104000000	110000000	121000000
RS12_HUMAN	RPS12	215000000	196000000	206000000	306000000
BRD2_HUMAN	BRD2	17200000	14500000	14300000	13600000
TNR6_HUMAN	FAS	14200000	4570000	14400000	13300000
TYY1_HUMAN	YY1	34300000	44600000	31100000	41900000
DNJB1_HUMAN	DNAJB1	124000000	104000000	125000000	113000000
DNJB2_HUMAN	DNAJB2	4730000	5760000	4710000	3440000
ATPA_HUMAN	ATP5F1A	237000000	252000000	319000000	207000000
PSA1_HUMAN	PSMA1	342000000	384000000	409000000	413000000
PSA2_HUMAN	PSMA2	279000000	304000000	313000000	298000000
PSA3_HUMAN	PSMA3	331000000	330000000	339000000	362000000
PSA4_HUMAN	PSMA4	348000000	330000000	358000000	355000000
S100P_HUMAN	S100P	17600000	807000000	1070000000	1120000000
IKBA_HUMAN	NFKBIA	2010000	2600000	2810000	1640000
ITA3_HUMAN	ITGA3	53900000	66100000	26000000	65200000
PTX3_HUMAN	PTX3
MOES_HUMAN	MSN	374000000	324000000	350000000
PTN3_HUMAN	PTPN3	2640000	3080000	3820000	2380000
DDX6_HUMAN	DDX6	80700000	77400000	76400000	63300000
CTNA2_HUMAN	CTNNA2	8010000	6430000	31400000	14700000
DNMT1_HUMAN	DNMT1	70800000	54900000	46100000	38200000
U2AF2_HUMAN	U2AF2	229000000	223000000	190000000	190000000
RL13_HUMAN	RPL13	165000000	136000000	190000000	203000000
RAE2_HUMAN	CHML	32200000	22100000	23700000	22800000
IVD_HUMAN	IVD	33800000	36800000	44000000	39900000
S10A4_HUMAN	S100A4	91600000	172000000	364000000	112000000
MGAT1_HUMAN	MGAT1	1630000			1100000
HMGB2_HUMAN	HMGB2	478000000	411000000	450000000	463000000
PTBP1_HUMAN	PTBP1	548000000	576000000	616000000	581000000
SYTC_HUMAN	TARS1	290000000	275000000	300000000	299000000
SYVC_HUMAN	VARS1	205000000	171000000	186000000	186000000
EF1G_HUMAN	EEF1G	1390000000	1120000000	1220000000	1180000000
FKBP2_HUMAN	FKBP2	359000000	395000000	397000000	374000000
STOM_HUMAN	STOM	8860000	4210000	17300000	17000000
KAD4_HUMAN	AK4	4400000	13200000	24100000	12600000
1433T_HUMAN	YWHAQ	781000000	782000000	759000000	872000000
MK03_HUMAN	MAPK3	82200000	116000000	142000000	120000000
MARK3_HUMAN	MARK3	16300000	19900000	16700000	16500000
DPP4_HUMAN	DPP4	2870000	9790000	14700000	14300000
ARNT_HUMAN	ARNT	3120000	3660000	2580000	2400000
RL10_HUMAN	RPL10	134000000	121000000	163000000	214000000
CO8A1_HUMAN	COL8A1
RFA1_HUMAN	RPA1	123000000	126000000	137000000	116000000
APEX1_HUMAN	APEX1	368000000	445000000	428000000	401000000
CD82_HUMAN	CD82
DCK_HUMAN	DCK	40800000	33500000	39500000	37600000
PYR1_HUMAN	CAD	120000000	106000000	117000000	112000000
CALR_HUMAN	CALR	1330000000	1530000000	1560000000	1240000000
MAP4_HUMAN	MAP4	166000000	174000000	233000000	210000000
MAP4_HUMAN	MAP4	1280000	746380		590557
MAP4_HUMAN	MAP4
CALX_HUMAN	CANX	442000000	428000000	463000000	302000000
P85A_HUMAN	PIK3R1	2890000	3660000	3170000	2820000
IP3KB_HUMAN	ITPKB		860846	1020000	1640000
PSB8_HUMAN	PSMB8	92000000	114000000	145000000	104000000
PSB9_HUMAN	PSMB9	30800000	40500000	66300000	38700000
PSA5_HUMAN	PSMA5	348000000	329000000	363000000	396000000
PSB4_HUMAN	PSMB4	160000000	139000000	155000000	147000000
PSB6_HUMAN	PSMB6	306000000	294000000	287000000	330000000
PSB5_HUMAN	PSMB5	202000000	203000000	182000000	220000000
GSTM2_HUMAN	GSTM2
ABCD3_HUMAN	ABCD3	5490000	6400000	6430000	6300000
ITPI2_HUMAN	ITPRID2	2280000	2170000	1630000	1180000
LYOX_HUMAN	LOX
NDUS1_HUMAN	NDUFS1	13200000	12400000	16300000	14900000
DPOD1_HUMAN	POLD1	188000000	184000000	223000000	150000000
TEAD1_HUMAN	TEAD1	28800000	15200000	18100000	18500000
SMCA1_HUMAN	SMARCA1
MK01_HUMAN	MAPK1	96900000	110000000	127000000	130000000
GRAN_HUMAN	GCA		5700000	4360000	8180000
RXRB_HUMAN	RXRB	6760000	8960000	7620000	6530000
ERCC5_HUMAN	ERCC5	2990000	3400000	2420000	2700000
RBL1_HUMAN	RBL1	813232		704953
GRN_HUMAN	GRN	4010000	5680000	5530000	12600000
PTPRM_HUMAN	PTPRM
AMPL_HUMAN	LAP3	137000000	117000000	129000000	121000000
S10A2_HUMAN	S100A2	4380000	3360000	2780000
T2EA_HUMAN	GTF2E1	12700000	15800000	16700000	14200000
T2EB_HUMAN	GTF2E2	13200000	16300000	16700000	15800000
PCSK6_HUMAN	PCSK6	11900000	11900000	7830000	8610000
TPP2_HUMAN	TPP2	50600000	43700000	44400000	49100000
IMPA1_HUMAN	IMPA1	19300000	18800000	18200000	24300000
CCN2_HUMAN	CCN2		949648
EPHA2_HUMAN	EPHA2	19900000	12800000	26200000	14900000
EPHB2_HUMAN	EPHB2	9540000	10100000	11200000	12700000
PTN6_HUMAN	PTPN6	10300000	13800000	15100000	12200000
SHC1_HUMAN	SHC1	13400000	12200000	15200000	15800000
3MG_HUMAN	MPG	8600000	7690000	7930000	6410000
RABP2_HUMAN	CRABP2				1290000
TKT_HUMAN	TKT	470000000	318000000	468000000	458000000
CASP1_HUMAN	CASP1
LMOD1_HUMAN	LMOD1
RBMS1_HUMAN	RBMS1	52600000	41200000	54500000	59600000
PML_HUMAN	PML	5430000	4910000	4610000	8550000
EF1D_HUMAN	EEF1D	776000000	710000000	722000000	686000000
EF1D_HUMAN	EEF1D	19100000	19900000	17200000	20400000
EF1D_HUMAN	EEF1D	26300000	25400000	30700000	22000000
MARCS_HUMAN	MARCKS	183000000	156000000	148000000	215000000
GNA11_HUMAN	GNA11	30000000	29900000	33000000	39300000
AL4A1_HUMAN	ALDH4A1	17900000	12800000	13900000	14800000
PBLD_HUMAN	PBLD	3770000	6350000	8900000	5980000
ERP29_HUMAN	ERP29	307000000	378000000	368000000	340000000
PRDX6_HUMAN	PRDX6	1110000000	1210000000	974000000	982000000
BLVRB_HUMAN	BLVRB	256000000	247000000	307000000	305000000
PRDX5_HUMAN	PRDX5	1120000000	1020000000	1520000000	1560000000
DOPD_HUMAN	DDT	423000000	478000000	407000000	458000000
GFRP_HUMAN	GCHFR	57300000	50100000	82100000	52700000
PRDX3_HUMAN	PRDX3	563000000	622000000	693000000	757000000
ATPD_HUMAN	ATP5F1D	81700000	56900000	74500000	42100000
RL12_HUMAN	RPL12	194000000	164000000	223000000	270000000
ECHM_HUMAN	ECHS1	298000000	286000000	275000000	301000000
KCY_HUMAN	CMPK1	113000000	112000000	147000000	140000000
PEBP1_HUMAN	PEBP1	962000000	1100000000	1150000000	1170000000
PDIA3_HUMAN	PDIA3	830000000	1220000000	1200000000	976000000
2AAA_HUMAN	PPP2R1A	348000000	344000000	375000000	397000000
2AAB_HUMAN	PPP2R1B	45500000	60000000	55800000	55600000
CDC27_HUMAN	CDC27	15400000	15800000	15600000	13900000
WEE1_HUMAN	WEE1	3200000	5090000	6530000	4590000
MPIP3_HUMAN	CDC25C	4630000	4120000	3830000	2780000
PPIF_HUMAN	PPIF	71200000	114000000	148000000	168000000
T4S1_HUMAN	TM4SF1	2890000			2140000
NMT1_HUMAN	NMT1	77400000	66400000	46000000	74400000
HMOX2_HUMAN	HMOX2	80800000	69200000	83500000	57100000
PURA2_HUMAN	ADSS2	87500000	106000000	95200000	93600000
UFO_HUMAN	AXL
AMRP_HUMAN	LRPAP1	31000000	36200000	29800000	25700000
TSPO_HUMAN	TSPO	2800000	6520000	9320000	5140000
OXYR_HUMAN	OXTR
PUR8_HUMAN	ADSL	99400000	70600000	59600000	85300000
CLIP1_HUMAN	CLIP1	25200000	30200000	34300000	31900000
SORCN_HUMAN	SRI	136000000	193000000	222000000	232000000
GSTT1_HUMAN	GSTT1	12200000	11600000	12600000	12900000
ILEU_HUMAN	SERPINB1	159000000	226000000	273000000	254000000
CTR1_HUMAN	SLC7A1	14400000	16500000	16000000	16100000
AL1B1_HUMAN	ALDH1B1	277000000	266000000	377000000	290000000
AL3A1_HUMAN	ALDH3A1	52400000	77700000	75300000	59300000
RPB2_HUMAN	POLR2B	40100000	36700000	37800000	35200000
SDHA_HUMAN	SDHA	33100000	33000000	39800000	24400000
COR1A_HUMAN	CORO1A	16900000	29300000	39700000	26900000
GDIA_HUMAN	GDI1	21400000	32500000	33400000	32200000
METK2_HUMAN	MAT2A	141000000	125000000	138000000	153000000
HXA10_HUMAN	HOXA10	9830000	9190000	12400000	7720000
HXA13_HUMAN	HOXA13	11600000	9210000	7550000	5300000
KAP1_HUMAN	PRKAR1B	6210000	3350000	4740000	2980000
KAP3_HUMAN	PRKAR2B		2180000
CPSM_HUMAN	CPS1	8210000	5470000	15500000	5920000
RIR2_HUMAN	RRM2	37900000	33000000	55400000	35700000
SDC4_HUMAN	SDC4	3300000	2200000	2140000	7290000
TIA1_HUMAN	TIA1	27700000	41400000	18500000	22800000
SC6A6_HUMAN	SLC6A6	2170000	2300000
DNJA1_HUMAN	DNAJA1	72800000	67600000	75700000	66300000
AKT1_HUMAN	AKT1	13000000	14000000	17000000	14100000
AKT2_HUMAN	AKT2	5110000	5040000	6440000	5280000
QCR1_HUMAN	UQCRC1	16900000	18200000	26700000	15700000
3HIDH_HUMAN	HIBADH	81100000	94700000	138000000	114000000
PUR9_HUMAN	ATIC	353000000	357000000	409000000	386000000
HNRH3_HUMAN	HNRNPH3	81300000	84100000	67000000	68900000
HNRH1_HUMAN	HNRNPH1	525000000	551000000	456000000	433000000
1433B_HUMAN	YWHAB	671000000	685000000	712000000	612000000
1433S_HUMAN	SFN	379000000	352000000	585000000	368000000
STIP1_HUMAN	STIP1	1270000000	1070000000	1180000000	1090000000
S10AB_HUMAN	S100A11	468000000	679000000	727000000	576000000
I5P2_HUMAN	INPP5B	50600000	44100000	50200000	40200000
PRDX2_HUMAN	PRDX2	882000000	940000000	1000000000	1010000000
ARRB2_HUMAN	ARRB2	2940000	5310000	3600000	3100000
GLPK_HUMAN	GK	1230000	1190000		987247
CDD_HUMAN	CDA		9650000	6080000	11100000
DCTD_HUMAN	DCTD	35800000	36700000	45200000	51500000
P5CR1_HUMAN	PYCR1	124000000	94700000	151000000	137000000
GBP1_HUMAN	GBP1		2690000
GBP2_HUMAN	GBP2	2310000	2430000		2910000
ELF1_HUMAN	ELF1	20600000	18400000	21900000	17700000
TF2H1_HUMAN	GTF2H1	5020000	4330000	4680000	5960000
STX2_HUMAN	STX2			704662	995986
CGL_HUMAN	CTH	14500000	41400000	33600000	41600000
RL9_HUMAN	RPL9P9	109000000	98800000	130000000	158000000
ACSL1_HUMAN	ACSL1	6210000	12900000	13300000	9690000
KINH_HUMAN	KIF5B	132000000	140000000	159000000	157000000
CSTF2_HUMAN	CSTF2	48200000	52100000	42600000	38800000
DUT_HUMAN	DUT	218000000	200000000	160000000	123000000
MRP1_HUMAN	ABCC1	3710000	3660000	2990000	3890000
CKS2_HUMAN	CKS2	18300000	17400000	14200000	9690000
ABCD1_HUMAN	ABCD1		717666	988671	708625
ERD22_HUMAN	KDELR2	28100000	12200000	20600000	15800000
TTK_HUMAN	TTK	3330000	3500000	4510000	3500000
MCM4_HUMAN	MCM4	134000000	114000000	102000000	79000000
MCM5_HUMAN	MCM5	323000000	241000000	221000000	175000000
MCM7_HUMAN	MCM7	128000000	104000000	93800000	69900000
GALNS_HUMAN	GALNS	8680000	13500000	8420000	7970000
SDC2_HUMAN	SDC2
GLYC_HUMAN	SHMT1	84000000	73000000	78700000	81800000
GLYM_HUMAN	SHMT2	1420000000	1090000000	1280000000	1310000000
HYES_HUMAN	EPHX2	6410000	5860000	7270000	5260000
HSP74_HUMAN	HSPA4	457000000	435000000	432000000	496000000
MPI_HUMAN	MPI	27000000	32400000	24800000	39200000
PROF2_HUMAN	PFN2	160000000	194000000	223000000	225000000
PROF2_HUMAN	PFN2	26200000	15200000	28700000	17200000
CTNA1_HUMAN	CTNNA1	562000000	617000000	754000000	629000000
CTNB1_HUMAN	CTNNB1	161000000	186000000	222000000	202000000
BMI1_HUMAN	BMI1	12900000	10200000	8480000	7370000
PHB1_HUMAN	PHB1	41700000	60000000	108000000	40300000
SPB6_HUMAN	SERPINB6	89100000	106000000	148000000	127000000
MERL_HUMAN	NF2	6380000	4860000	7320000	4860000
RADI_HUMAN	RDX	125000000	234000000	186000000	204000000
RFA3_HUMAN	RPA3	70100000	66000000	71000000	57000000
RFC4_HUMAN	RFC4	61400000	58600000	55700000	42100000
RFC2_HUMAN	RFC2	86600000	81000000	82600000	66600000
RFC1_HUMAN	RFC1	34400000	30400000	24300000	16200000
RL22_HUMAN	RPL22	114000000	114000000	166000000	154000000
T2FA_HUMAN	GTF2F1	101000000	93700000	83000000	100000000
SPRE_HUMAN	SPR	206000000	191000000	225000000	205000000
RORA_HUMAN	RORA	119898
IDUA_HUMAN	IDUA				1680000
K1C9_HUMAN	KRT9	12700000	1780000	33500000	4310000
MSX2_HUMAN	MSX2	15700000	19300000	18600000	17700000
FBN1_HUMAN	FBN1
IRS1_HUMAN	IRS1	13400000	7020000	11700000	13300000
GDE_HUMAN	AGL	5620000	4270000	8610000	4210000
MYH9_HUMAN	MYH9	293000000	366000000	517000000	395000000
MYH10_HUMAN	MYH10	28600000	43800000	39300000	35700000
MYH10_HUMAN	MYH10		3280000	2440000	3160000
COPB2_HUMAN	COPB2	77200000	96700000	92200000	89100000
ACTN2_HUMAN	ACTN2	12900000	5790000	13500000	17400000
SOAT1_HUMAN	SOAT1
ADDA_HUMAN	ADD1	67000000	75300000	84500000	76800000
ADDB_HUMAN	ADD2
BASI_HUMAN	BSG	190000000	308000000	304000000	291000000
ARBK2_HUMAN	GRK3	915583	966261	933456	801252
FUS_HUMAN	FUS	476000000	405000000	444000000	331000000
NU214_HUMAN	NUP214	29700000	32900000	31400000	27400000
DEK_HUMAN	DEK	222000000	203000000	199000000	199000000
ATP7B_HUMAN	ATP7B
GLRX1_HUMAN	GLRX	60500000	51800000	71700000	98200000
CHKA_HUMAN	CHKA	61400000	148000000	120000000	109000000
PPM1A_HUMAN	PPM1A	17200000	18100000	19600000	19300000
AHR_HUMAN	AHR	13700000	10800000	11900000	10500000
K1C20_HUMAN	KRT20	135000000	173000000	316000000	174000000
K22E_HUMAN	KRT2	15700000	20900000	21700000	105000000
HMGCL_HUMAN	HMGCL	74100000	82800000	117000000	105000000
PRS7_HUMAN	PSMC2	227000000	232000000	222000000	234000000
MOT8_HUMAN	SLC16A2				1020000
ARL2_HUMAN	ARL2	35300000	29500000	35200000	31200000
ARL3_HUMAN	ARL3	79400000	71800000	90600000	71300000
TRI23_HUMAN	TRIM23	21100000	22000000	26400000	25500000
MP2K2_HUMAN	MAP2K2	57300000	44200000	48200000	54100000
ATPG_HUMAN	ATP5F1C	91400000	70100000	90600000	41300000
VATE1_HUMAN	ATP6V1E1	55100000	61500000	63300000	62700000
HEM6_HUMAN	CPOX	562000000	465000000	695000000	517000000
RL4_HUMAN	RPL4	218000000	189000000	262000000	338000000
8ODP_HUMAN	NUDT1	24900000	18700000	19400000	21600000
LONM_HUMAN	LONP1	67400000	76400000	91900000	83000000
PGM1_HUMAN	PGM1	103000000	102000000	138000000	94400000
PP1G_HUMAN	PPP1CC	34000000	37800000	34100000	29800000
TGFR1_HUMAN	TGFBR1	2060000	2760000	1490000	1730000
GNL1_HUMAN	GNL1	67900000	73100000	74300000	73500000
SPB5_HUMAN	SERPINB5	89600000	72200000	249000000	197000000
RPB9_HUMAN	POLR2I	10800000	12300000	7590000	11000000
SRBP1_HUMAN	SREBF1	348413	379035	472522	321856
ODO2_HUMAN	DLST	109000000	98800000	148000000	106000000
GMPR1_HUMAN	GMPR	3500000	4180000	641385	3380000
GPX4_HUMAN	GPX4	26300000	26300000	36300000	38000000
SCNNA_HUMAN	SCNN1A	711642	1120000	1460000	1480000
SRP14_HUMAN	SRP14	152000000	147000000	186000000	162000000
TGFR2_HUMAN	TGFBR2
NUP62_HUMAN	NUP62	22100000	27900000	26000000	23900000
HPCL1_HUMAN	HPCAL1	8670000	8980000	11900000	8350000
FDFT_HUMAN	FDFT1	37200000	23600000	37600000	22100000
TAGL2_HUMAN	TAGLN2	466000000	462000000	399000000	407000000
TALDO_HUMAN	TALDO1	1020000000	1010000000	1020000000	995000000
SYUA_HUMAN	SNCA
ETFB_HUMAN	ETFB	228000000	262000000	294000000	309000000
RBMX_HUMAN	RBMX	41400000	29600000	25000000	25300000
BRCA1_HUMAN	BRCA1	3080000	3340000	2910000	1160000
COIL_HUMAN	COIL		734716
VKGC_HUMAN	GGCX	7030000	4930000	4650000	4460000
LICH_HUMAN	LIPA	43600000	44900000	40600000	36200000
VATA_HUMAN	ATP6V1A	96300000	99700000	112000000	104000000
GRP75_HUMAN	HSPA9	989000000	884000000	987000000	1010000000
IF4A3_HUMAN	EIF4A3	159000000	172000000	137000000	144000000
SMBP2_HUMAN	IGHMBP2	881912	866231	911759	717533
CDN1A_HUMAN	CDKN1A	5640000		2420000	4520000
RS19_HUMAN	RPS19	184000000	182000000	223000000	245000000
RL3_HUMAN	RPL3	202000000	168000000	232000000	314000000
OST48_HUMAN	DDOST	111000000	105000000	114000000	70800000
AN32A_HUMAN	ANP32A	414000000	425000000	487000000	551000000
FEN1_HUMAN	FEN1	394000000	324000000	343000000	313000000
CUX1_HUMAN	CUX1	10400000	13200000	10300000	8610000
CAPG_HUMAN	CAPG	16300000	91700000	80400000	71100000
CAP2_HUMAN	CAP2	18900000	13500000	17100000	16000000
IL6RB_HUMAN	IL6ST	3240000		1400000	2450000
TXLNA_HUMAN	TXLNA	35300000	28000000	30400000	28500000
TCPZ_HUMAN	CCT6A	510000000	466000000	496000000	501000000
NNMT_HUMAN	NNMT	65200000	20100000	110000000	54000000
PSB10_HUMAN	PSMB10	30800000	34100000	48500000	42900000
VHL_HUMAN	VHL	856538	934974	1160000	1400000
PBX1_HUMAN	PBX1		1050000
PBX2_HUMAN	PBX2	2970000	4520000	3870000	4030000
RL13A_HUMAN	RPL13A	110000000	94400000	116000000	161000000
ARL1_HUMAN	ARL1	182000000	191000000	195000000	170000000
MLH1_HUMAN	MLH1	15500000	17300000	15400000	14100000
STAT3_HUMAN	STAT3	63300000	71200000	76400000	68000000
UBP8_HUMAN	USP8	16800000	17500000	18400000	19200000
[truncated: 5,736 more rows]
