# Supplementary material for: CUL4A-DDB1-DCAF10 is an N-recognin for N-terminally acetylated Src kinases
Source: Research Square preprint supplement (doi:10.21203/rs.3.rs-6184818/v1), 2025-04-01
Supplement: Supplementary file 4 [file c54165245753cc947fae4179.xlsx]

## Sheet: acGlycine_acAlanine
Significant	LOG (-10 of p-value)	Difference	Protein.Group	Protein.Names	Genes	First.Protein.Description	Lyn_acA_1.raw	Lyn_acA_2.raw	Lyn_acA_3.raw	Lyn_acG_1.raw	Lyn_acG_2.raw	Lyn_acG_3.raw
+	1.65608	4.42706	Q5QP82	DCA10_HUMAN	DCAF10	DDB1- and CUL4-associated factor 10	20.228	19.3868	16.24	23.2474	22.9874	22.9012
+	2.28241	6.94978	P32119	PRDX2_HUMAN	PRDX2	Peroxiredoxin-2	14.7819	14.3386	13.8218	20.3424	23.6913	19.7579
+	2.84053	6.19166	Q6ZN66;Q8N8V2;Q96PP9	GBP4_HUMAN;GBP6_HUMAN;GBP7_HUMAN	GBP4;GBP6;GBP7	Guanylate-binding protein 6	16.4354	15.8109	13.814	21.588	21.592	21.4552
+	2.57121	5.06163	P49755	TMEDA_HUMAN	TMED10	Transmembrane emp24 domain-containing protein 10	14.6886	15.9167	14.0124	19.575	20.962	19.2655
+	1.96865	2.69883	Q96P11;Q96P11-2;Q96P11-4	NSUN5_HUMAN	NSUN5	28S rRNA (cytosine-C(5))-methyltransferase	16.0008	16.262	17.8748	19.446	19.1853	19.6029
+	1.62611	2.43104	P05089;P05089-2	ARGI1_HUMAN	ARG1	Arginase-1	16.4851	15.3001	16.5486	19.6419	18.0051	17.98
+	1.71165	2.24935	Q5T8P6-3;Q5T8P6-4;Q5T8P6-5;Q5T8P6;Q5T8P6-2	RBM26_HUMAN	RBM26	RNA-binding protein 26	16.1528	14.8008	15.8285	16.9922	18.1264	18.4115
+	3.76767	2.10105	Q16531	DDB1_HUMAN	DDB1	DNA damage-binding protein 1	22.0427	22.0047	21.9619	24.406	23.9974	23.9091
	1.52591	5.45063	P31946;P31946-2	1433B_HUMAN	YWHAB	14-3-3 protein beta/alpha	15.3664	14.9693	14.6361	18.6188	23.705	18.9999
	1.69534	4.9715	P01040	CYTA_HUMAN	CSTA	Cystatin-A	16.7178	14.5698	16.2436	23.1095	19.9637	19.3725
	1.14292	4.4027	Q99832;Q99832-3	TCPH_HUMAN	CCT7	T-complex protein 1 subunit eta	16.0469	15.4266	20.1012	20.2587	23.6981	20.826
	0.9707	4.09163	P60900;P60900-2	PSA6_HUMAN	PSMA6	Proteasome subunit alpha type-6	15.941	14.8359	14.8802	19.7278	22.4451	15.7591
	1.03461	3.44319	Q9Y3C6	PPIL1_HUMAN	PPIL1	Peptidyl-prolyl cis-trans isomerase-like 1	13.9886	15.0249	14.2437	14.9144	20.0569	18.6154
	0.659137	3.38781	P09429	HMGB1_HUMAN	HMGB1	High mobility group protein B1	21.2188	17.2704	13.907	19.3373	22.676	20.5463
	0.556313	3.38401	P12277	KCRB_HUMAN	CKB	Creatine kinase B-type	17.4443	15.9593	15.3587	14.6854	23.6176	20.6114
	0.680776	3.3808	P27797	CALR_HUMAN	CALR	Calreticulin	19.8553	17.1262	15.4679	18.9076	24.5821	19.1021
	0.480646	3.37718	Q96FC9;Q96FC9-2;Q96FC9-3;Q96FC9-4;Q96FC9-5	DDX11_HUMAN	DDX11	ATP-dependent DNA helicase DDX11	17.0839	26.265	26.2006	26.6136	26.3085	26.7589
	0.771818	3.32741	P07737	PROF1_HUMAN	PFN1	Profilin-1	19.9315	18.3612	18.5879	19.6938	26.0469	21.1222
	0.745427	3.15047	H7BY36	H7BY36_HUMAN	EWSR1	Isoform of Q01844, EWS RNA binding protein 1 (Fragment)	16.4013	13.274	19.9009	20.0552	19.0473	19.925
	1.04085	3.12418	P28070	PSB4_HUMAN	PSMB4	Proteasome subunit beta type-4	16.0691	15.6684	18.0101	19.2376	21.9979	17.8847
	1.522	3.1048	O43324;O43324-2	MCA3_HUMAN	EEF1E1	Eukaryotic translation elongation factor 1 epsilon-1	16.1672	14.8148	17.4676	18.7836	20.3486	18.6317
	0.758861	2.95106	O14818	PSA7_HUMAN	PSMA7	Proteasome subunit alpha type-7	16.0206	16.0772	18.3032	19.1782	22.8043	17.2717
	0.736701	2.89907	Q9ULV4;Q9ULV4-2;Q9ULV4-3	COR1C_HUMAN	CORO1C	Coronin-1C	15.9553	14.5018	20.4181	19.5194	20.4435	19.6094
	0.764091	2.89343	P0CG38	POTEI_HUMAN	POTEI	POTE ankyrin domain family member I	19.7602	20.634	15.034	21.5393	21.3879	21.1812
	0.760371	2.74339	P17980	PRS6A_HUMAN	PSMC3	26S proteasome regulatory subunit 6A	17.1023	13.4943	17.4345	18.079	20.8643	17.3179
	0.678042	2.6716	P26599;P26599-1;P26599-2	PTBP1_HUMAN	PTBP1	Polypyrimidine tract-binding protein 1	15.3375	18.849	19.6452	19.5606	23.0206	19.2653
	0.746854	2.6344	Q96AE4-2	FUBP1_HUMAN	FUBP1	Isoform of Q96AE4, Isoform 2 of Far upstream element-binding protein 1	15.5582	18.1179	18.2145	18.4174	22.6578	18.7186
	0.388299	2.56058	Q01105-2	SET_HUMAN	SET	Isoform of Q01105, Isoform 2 of Protein SET	16.2224	15.3518	19.2282	19.1332	24.0267	15.3242
	1.02306	2.51937	Q13619	CUL4A_HUMAN	CUL4A	Cullin-4A	17.0302	20.3631	20.315	21.4947	22.4415	21.3302
	0.492687	2.5092	H0YL69	H0YL69_HUMAN	PSMA4	Isoform of P25789, Proteasome subunit alpha type (Fragment)	16.3945	18.285	14.9436	19.5213	22.252	15.3774
	0.500434	2.49414	Q14978-3	NOLC1_HUMAN	NOLC1	Isoform of Q14978, Isoform 3 of Nucleolar and coiled-body phosphoprotein 1	15.1259	21.2671	21.9519	21.8936	21.6619	22.2719
	0.625499	2.47633	P06733	ENOA_HUMAN	ENO1	Alpha-enolase	21.6711	19.9708	19.6929	20.8201	26.2219	21.7218
	0.903476	2.47518	Q9BZI7;Q9BZI7-2	REN3B_HUMAN	UPF3B	Regulator of nonsense transcripts 3B	14.3182	15.4714	18.552	18.3291	18.4743	18.9638
	0.812885	2.43096	P11310;P11310-2	ACADM_HUMAN	ACADM	Medium-chain specific acyl-CoA dehydrogenase, mitochondrial	16.7934	15.2608	18.2323	18.211	21.362	18.0064
	0.645989	2.40389	P60174;P60174-3	TPIS_HUMAN	TPI1	Triosephosphate isomerase	16.0712	17.8669	17.6059	17.6241	22.7227	18.4089
	0.682659	2.38498	P10599	THIO_HUMAN	TXN	Thioredoxin	21.2404	20.3712	19.9044	21.9076	25.9087	20.8546
	0.665002	2.35601	P55072	TERA_HUMAN	VCP	Transitional endoplasmic reticulum ATPase	19.4147	16.4188	18.3498	19.3103	23.0948	18.8462
	0.554634	2.3039	Q15149-4	PLEC_HUMAN	PLEC	Isoform of Q15149, Isoform 4 of Plectin	19.5468	13.655	18.7008	19.6584	19.6844	19.4715
	0.638363	2.29431	P04259	K2C6B_HUMAN	KRT6B	Keratin, type II cytoskeletal 6B	16.0009	21.4542	18.4465	20.9871	21.5484	20.2491
	0.536057	2.27167	P23528	COF1_HUMAN	CFL1	Cofilin-1	20.1211	18.6794	19.137	19.4247	25.2015	20.1262
	0.921474	2.2582	P55769	NH2L1_HUMAN	SNU13	NHP2-like protein 1	16.653	15.9344	19.6597	19.6804	19.8322	19.5092
	0.705335	2.20422	P12956;P12956-2	XRCC6_HUMAN	XRCC6	X-ray repair cross-complementing protein 6	16.1799	15.6576	17.727	17.17	21.2722	17.735
	0.973244	2.19339	O00712;O00712-4;O00712-5	NFIB_HUMAN	NFIB	Nuclear factor 1 B-type	16.1195	15.7216	18.4236	18.2415	20.2194	18.384
	0.847454	2.18462	P01116;P01116-2	RASK_HUMAN	KRAS	GTPase KRas	16.7432	14.4247	18.4678	18.7879	19.1265	18.2751
	0.688864	2.15643	Q9NP97	DLRB1_HUMAN	DYNLRB1	Dynein light chain roadblock-type 1	14.9534	17.7166	18.2114	17.8695	21.0973	18.3839
	0.638626	2.15068	Q9NPA8;Q9NPA8-2	ENY2_HUMAN	ENY2	Transcription and mRNA export factor ENY2	14.7185	19.1255	19.4039	19.8118	20.0433	19.8448
	0.464586	2.13883	P61604	CH10_HUMAN	HSPE1	10 kDa heat shock protein, mitochondrial	20.3012	18.5351	18.241	19.2934	24.932	19.2685
	0.543472	2.13077	Q9Y265	RUVB1_HUMAN	RUVBL1	RuvB-like 1	15.0693	19.8274	19.7971	19.6473	21.7786	19.6603
	0.467776	2.11844	P62937	PPIA_HUMAN	PPIA	Peptidyl-prolyl cis-trans isomerase A	22.0025	20.7305	20.1421	21.3183	26.8373	21.0749
	0.359932	2.11615	A0A804HLA8;P63218	GBG5B_HUMAN;GBG5_HUMAN	GNG5;GNG5B	Guanine nucleotide-binding protein G(I)/G(S)/G(O) subunit gamma-5B	21.4793	13.9609	20.956	21.6349	20.6444	20.4653
	0.592168	2.09605	P60903	S10AA_HUMAN	S100A10	Protein S100-A10	16.2783	20.1314	19.7436	20.2548	22.7579	19.4287
	0.487342	2.09452	P38919	IF4A3_HUMAN	EIF4A3	Eukaryotic initiation factor 4A-III	16.2403	15.4074	18.7848	15.8642	21.1097	19.7422
	0.805207	2.08683	Q13242	SRSF9_HUMAN	SRSF9	Serine/arginine-rich splicing factor 9	16.7022	15.1097	18.6618	18.0285	20.1003	18.6054
	0.456375	2.0618	P60468	SC61B_HUMAN	SEC61B	Protein transport protein Sec61 subunit beta	15.205	21.0064	21.0499	20.9443	21.0181	21.4843
	0.495001	2.05982	P04406	G3P_HUMAN	GAPDH	Glyceraldehyde-3-phosphate dehydrogenase	23.0008	22.1557	21.9858	22.6341	28.0165	22.6712
	0.838794	2.05501	P36542;P36542-2	ATPG_HUMAN	ATP5F1C	ATP synthase subunit gamma, mitochondrial	17.1612	15.3176	19.0845	19.5258	19.6203	18.5822
	0.645554	2.04712	Q69YL0	NCAS2_HUMAN	NCBP2AS2	Protein NCBP2AS2	19.5651	15.1465	15.5326	18.689	18.4509	19.2456
	0.756621	2.04457	Q08554;Q08554-2	DSC1_HUMAN	DSC1	Desmocollin-1	15.9957	19.2602	18.851	21.4697	19.5222	19.2488
	0.524117	2.02016	P12814;P12814-2;P12814-3;P12814-4	ACTN1_HUMAN	ACTN1	Alpha-actinin-1	15.2375	19.6577	20.5044	19.9668	21.3907	20.1027
	0.587099	2.01082	P35606;P35606-2	COPB2_HUMAN	COPB2	Coatomer subunit beta'	15.7041	17.9567	20.3316	19.4425	21.4819	19.1006
	0.574951	1.97843	Q13200	PSMD2_HUMAN	PSMD2	26S proteasome non-ATPase regulatory subunit 2	15.158	15.7123	15.2581	16.482	20.317	15.2646
	0.436022	1.96695	P07195	LDHB_HUMAN	LDHB	L-lactate dehydrogenase B chain	20.6519	20.2619	20.0887	20.2499	26.1499	20.5035
	0.491989	1.95663	P82933	RT09_HUMAN	MRPS9	Small ribosomal subunit protein uS9m	14.5487	19.7734	19.7071	20.1307	19.788	19.9805
	0.564561	1.95592	Q06830	PRDX1_HUMAN	PRDX1	Peroxiredoxin-1	21.4439	20.7832	20.7143	21.7783	25.9514	21.0795
	0.526496	1.95159	Q9H8H3	TMT1A_HUMAN	TMT1A	N6-adenosine-methyltransferase TMT1A	14.3378	18.7932	19.4431	18.9134	19.8933	19.6222
	0.843596	1.95118	P62258	1433E_HUMAN	YWHAE	14-3-3 protein epsilon	17.9106	18.9187	19.0404	19.5597	22.599	19.5645
	0.405418	1.93594	P00338;P00338-3	LDHA_HUMAN	LDHA	L-lactate dehydrogenase A chain	21.5995	19.4501	19.9695	20.1454	26.1046	20.5769
	0.487674	1.93026	P27824;P27824-2	CALX_HUMAN	CANX	Calnexin	20.339	15.6003	19.3991	20.1118	22.1087	18.9088
	0.582206	1.90515	Q9Y446;Q9Y446-2	PKP3_HUMAN	PKP3	Plakophilin-3	14.8026	18.782	19.485	19.5353	19.7188	19.531
	0.786611	1.89313	Q13428;Q13428-3;Q13428-4;Q13428-6;Q13428-7	TCOF_HUMAN	TCOF1	Treacle protein	17.2277	19.5282	21.0456	21.0971	21.2321	21.1516
	0.533495	1.87984	A0A8V8TNX9	A0A8V8TNX9_HUMAN	PKM	Isoform of P14618, Pyruvate kinase	21.4607	20.7135	20.6038	21.0151	25.8492	21.5533
	0.447334	1.8793	Q14232	EI2BA_HUMAN	EIF2B1	Translation initiation factor eIF-2B subunit alpha	16.1582	21.6654	21.4036	21.2822	22.0246	21.5583
	0.838906	1.87452	P17858	PFKAL_HUMAN	PFKL	ATP-dependent 6-phosphofructokinase, liver type	18.0354	16.4845	19.6349	19.4563	20.9215	19.4005
	0.346867	1.87414	P06241-2	FYN_HUMAN	FYN	Isoform of P06241, Isoform 2 of Tyrosine-protein kinase Fyn	21.6466	21.1778	14.7064	20.9977	20.9722	21.1833
	0.38835	1.85603	Q9UMS4	PRP19_HUMAN	PRPF19	Pre-mRNA-processing factor 19	14.9796	20.8633	21.1466	20.9252	21.0265	20.6058
	0.454402	1.85591	P12273	PIP_HUMAN	PIP	Prolactin-inducible protein	15.0877	20.5639	17.5634	20.8506	18.1961	19.736
	0.451671	1.85413	P04075;P04075-2	ALDOA_HUMAN	ALDOA	Fructose-bisphosphate aldolase A	20.6275	19.4363	19.5663	20.0331	25.1849	19.9745
	0.806422	1.83864	P01111	RASN_HUMAN	NRAS	GTPase NRas	16.3504	18.9936	19.6387	19.704	20.7709	20.0236
	0.713034	1.83741	O95373	IPO7_HUMAN	IPO7	Importin-7	16.5787	19.3761	19.2675	19.8108	21.689	19.2347
	0.451197	1.83242	Q00577	PURA_HUMAN	PURA	Transcriptional activator protein Pur-alpha	15.5015	20.7027	20.7157	20.5294	21.2205	20.6672
	0.624832	1.82614	Q9Y4B5	MTCL1_HUMAN	MTCL1	Microtubule cross-linking factor 1	14.7614	18.5239	18.6058	19.5496	18.4335	19.3864
	0.728952	1.79764	P98160	PGBM_HUMAN	HSPG2	Basement membrane-specific heparan sulfate proteoglycan core protein	15.2621	18.23	18.9483	19.3515	19.2996	19.1822
	0.514284	1.7658	P27695	APEX1_HUMAN	APEX1	DNA-(apurinic or apyrimidinic site) endonuclease	16.1141	18.8123	18.3216	17.6248	21.8943	19.0263
	0.965281	1.74456	P09651;P09651-2;P09651-3	ROA1_HUMAN	HNRNPA1	Heterogeneous nuclear ribonucleoprotein A1	21.5842	21.3843	21.5979	21.8358	24.7564	23.2079
	0.468069	1.74296	P13498	CY24A_HUMAN	CYBA	Cytochrome b-245 light chain	20.3178	19.5171	15.1616	19.8696	20.4268	19.9289
	0.588836	1.74294	P23284	PPIB_HUMAN	PPIB	Peptidyl-prolyl cis-trans isomerase B	20.0552	19.9074	19.959	20.3207	24.3575	20.4722
	0.529006	1.74162	P07355;P07355-2	ANXA2_HUMAN	ANXA2	Annexin A2	21.2539	20.0287	20.4079	21.3422	25.0699	20.5033
	0.65019	1.72511	O75396	SC22B_HUMAN	SEC22B	Vesicle-trafficking protein SEC22b	15.5403	18.7747	18.4706	18.6387	20.5431	18.7792
	1.26923	1.72031	P51991;P51991-2	ROA3_HUMAN	HNRNPA3	Heterogeneous nuclear ribonucleoprotein A3	18.4	18.0564	18.2494	18.7021	20.6528	20.5119
	0.399862	1.71777	P07237	PDIA1_HUMAN	P4HB	Protein disulfide-isomerase	19.4221	18.6426	18.24	18.3887	24.0357	19.0335
	0.624491	1.71538	P78371	TCPB_HUMAN	CCT2	T-complex protein 1 subunit beta	19.4139	18.9655	18.8868	19.6166	23.2534	19.5424
	0.287508	1.69883	Q8N9N2-2	ASCC1_HUMAN	ASCC1	Isoform of Q8N9N2, Isoform 2 of Activating signal cointegrator 1 complex subunit 1	13.8373	20.4987	21.3311	20.4676	19.7284	20.5675
	0.514183	1.67353	P63104	1433Z_HUMAN	YWHAZ	14-3-3 protein zeta/delta	21.675	21.605	21.4386	21.8898	26.0966	21.7528
	0.598196	1.63343	Q15427	SF3B4_HUMAN	SF3B4	Splicing factor 3B subunit 4	16.125	19.5364	19.8325	19.6696	20.6337	20.0909
	0.765224	1.60939	O60427	FADS1_HUMAN	FADS1	Acyl-CoA (8-3)-desaturase	17.9708	15.8499	19.1167	19.2268	19.0188	19.5199
	0.518353	1.60284	Q9NUL7	DDX28_HUMAN	DDX28	Probable ATP-dependent RNA helicase DDX28	15.215	19.1144	19.3962	19.4216	19.308	19.8046
	0.542657	1.59296	Q9Y399	RT02_HUMAN	MRPS2	Small ribosomal subunit protein uS2m	19.3306	15.3368	19.1135	19.5262	19.4748	19.5588
	0.345058	1.59026	P63151;P63151-2	2ABA_HUMAN	PPP2R2A	Serine/threonine-protein phosphatase 2A 55 kDa regulatory subunit B alpha isoform	17.9909	14.9383	14.5299	16.4266	20.4778	15.3254
	0.606639	1.57137	Q15029;Q15029-2;Q15029-3	U5S1_HUMAN	EFTUD2	116 kDa U5 small nuclear ribonucleoprotein component	15.3514	18.771	18.7765	18.9806	19.6371	18.9953
	0.641169	1.57068	P43243	MATR3_HUMAN	MATR3	Matrin-3	16.6205	19.0329	20.0939	19.8261	20.9638	19.6694
	0.579457	1.5686	P78362;P78362-2	SRPK2_HUMAN	SRPK2	SRSF protein kinase 2	16.3085	19.721	20.0918	20.1487	20.273	20.4053
	0.389334	1.54569	P14625	ENPL_HUMAN	HSP90B1	Endoplasmin	20.4431	19.5938	18.9379	19.4449	24.4316	19.7354
	0.603826	1.54028	Q8IWS0;Q8IWS0-3;Q8IWS0-5	PHF6_HUMAN	PHF6	PHD finger protein 6	16.2934	19.5684	19.791	19.7604	20.2874	20.2258
	1.24487	1.52872	P16435	NCPR_HUMAN	POR	NADPH--cytochrome P450 reductase	17.0415	16.262	18.0846	18.5571	19.1002	18.3169
	1.25002	1.52473	P29372;P29372-2;P29372-4;P29372-5	3MG_HUMAN	MPG	DNA-3-methyladenine glycosylase	17.1955	16.4349	15.7157	17.2267	18.2132	18.4805
	0.925483	1.52047	P22626	ROA2_HUMAN	HNRNPA2B1	Heterogeneous nuclear ribonucleoproteins A2/B1	21.9221	21.6186	21.6251	22.0859	24.6778	22.9636
	0.503155	1.51927	P51648;P51648-2	AL3A2_HUMAN	ALDH3A2	Aldehyde dehydrogenase family 3 member A2	14.8763	18.5304	18.3648	18.6241	19.829	17.8762
	0.546773	1.51807	P00387;P00387-2;P00387-3	NB5R3_HUMAN	CYB5R3	NADH-cytochrome b5 reductase 3	19.479	15.7715	17.9755	19.0575	20.3686	18.3543
	0.468362	1.51462	Q9UI30	TR112_HUMAN	TRMT112	Multifunctional methyltransferase subunit TRM112-like protein	15.5314	17.9041	17.9551	16.3955	20.1772	19.3618
	0.476625	1.50696	P07900;P07900-2	HS90A_HUMAN	HSP90AA1	Heat shock protein HSP 90-alpha	20.8241	20.0667	20.2129	20.5218	24.5793	20.5234
	0.438496	1.48916	O43390-2	HNRPR_HUMAN	HNRNPR	Isoform of O43390, Isoform 2 of Heterogeneous nuclear ribonucleoprotein R	15.0084	19.3836	19.3611	19.3786	19.3015	19.5405
	0.389819	1.48641	Q9NWT1	PK1IP_HUMAN	PAK1IP1	p21-activated protein kinase-interacting protein 1	16.2184	21.1046	20.9609	20.7362	20.9963	21.0107
	0.507217	1.4799	Q15527	SURF2_HUMAN	SURF2	Surfeit locus protein 2	17.1242	20.813	21.0517	21.2469	20.899	21.2826
	0.293327	1.46163	Q9Y5S9;Q9Y5S9-2	RBM8A_HUMAN	RBM8A	RNA-binding protein 8A	15.1304	14.7733	18.9927	15.1494	20.3416	17.7903
	0.477501	1.46053	Q9Y221;Q9Y221-2	NIP7_HUMAN	NIP7	60S ribosome subunit biogenesis protein NIP7 homolog	15.9064	20.0799	19.6595	20.0504	19.9089	20.0679
	0.655275	1.45802	O60884	DNJA2_HUMAN	DNAJA2	DnaJ homolog subfamily A member 2	16.0962	18.5345	18.603	19.0828	20.2582	18.2666
	0.45936	1.44497	P63241;P63241-2	IF5A1_HUMAN	EIF5A	Eukaryotic translation initiation factor 5A-1	20.864	20.9873	21.1065	21.1622	25.1413	20.9893
	0.666654	1.44172	P49761;P49761-1	CLK3_HUMAN	CLK3	Dual specificity protein kinase CLK3	17.6284	15.2695	18.512	18.3501	18.8818	18.5033
	0.469844	1.43967	Q5JTH9;Q5JTH9-2;Q5JTH9-3	RRP12_HUMAN	RRP12	RRP12-like protein	16.5987	20.5092	20.6376	20.5768	20.8	20.6877
	0.428552	1.42523	P50991	TCPD_HUMAN	CCT4	T-complex protein 1 subunit delta	19.768	19.4951	19.1566	19.9467	23.6741	19.0746
	0.700002	1.42398	O60524;O60524-3;O60524-4;O60524-5	NEMF_HUMAN	NEMF	Ribosome quality control complex subunit NEMF	17.344	19.113	20.5373	20.4046	20.5779	20.2837
	1.00873	1.42105	Q92541	RTF1_HUMAN	RTF1	RNA polymerase-associated protein RTF1 homolog	16.1821	17.9689	18.0571	18.8477	19.249	18.3747
	0.409761	1.40621	Q12931;Q12931-2	TRAP1_HUMAN	TRAP1	Heat shock protein 75 kDa, mitochondrial	22.4339	21.7379	22.0206	22.2517	26.3459	21.8133
	0.705947	1.40167	Q8IY37	DHX37_HUMAN	DHX37	Probable ATP-dependent RNA helicase DHX37	17.0931	19.077	19.9717	20.7394	19.8363	19.7711
	0.40485	1.39113	P15311	EZRI_HUMAN	EZR	Ezrin	20.7789	20.044	19.344	20.0696	24.2399	20.0308
	0.565163	1.38534	Q6P2Q9	PRP8_HUMAN	PRPF8	Pre-mRNA-processing-splicing factor 8	15.5347	18.8073	18.7747	19.0186	19.2596	18.9946
	0.617786	1.37964	A0A2R8Y738	A0A2R8Y738_HUMAN	RPL15	Isoform of P61313, Ribosomal protein L15 (Fragment)	18.1974	17.3499	15.2776	17.8061	19.3303	17.8273
	0.508642	1.36877	P61981	1433G_HUMAN	YWHAG	14-3-3 protein gamma	19.5001	18.9933	19.4024	19.4034	23.0009	19.5979
	0.741639	1.36786	Q16186	ADRM1_HUMAN	ADRM1	Proteasomal ubiquitin receptor ADRM1	15.8798	15.5132	15.3493	16.0789	18.6111	16.156
	0.560689	1.35592	P52292	IMA1_HUMAN	KPNA2	Importin subunit alpha-1	16.1824	18.5757	19.0497	18.6529	20.4977	18.7249
	0.511159	1.34693	Q9Y2X3	NOP58_HUMAN	NOP58	Nucleolar protein 58	16.1547	19.3706	19.8148	19.6887	19.7997	19.8925
	0.243167	1.32097	P14866;P14866-2	HNRPL_HUMAN	HNRNPL	Heterogeneous nuclear ribonucleoprotein L	15.7101	21.8956	22.2284	21.2308	20.7165	21.8497
	0.727194	1.31533	O95573	ACSL3_HUMAN	ACSL3	Fatty acid CoA ligase Acsl3	17.0235	18.3183	18.5289	18.2786	20.5768	18.9613
	0.496216	1.30921	P55795	HNRH2_HUMAN	HNRNPH2	Heterogeneous nuclear ribonucleoprotein H2	15.9267	18.5629	19.3157	18.6262	20.2768	18.8299
	0.612472	1.30791	O43707	ACTN4_HUMAN	ACTN4	Alpha-actinin-4	19.4322	18.5921	19.4512	19.6211	22.2958	19.4824
	0.481762	1.30673	P49756	RBM25_HUMAN	RBM25	RNA-binding protein 25	16.708	14.3218	18.2671	17.2227	17.8544	18.14
	0.415715	1.30668	Q5T6F2	UBAP2_HUMAN	UBAP2	Ubiquitin-associated protein 2	15.6298	19.6598	19.5971	19.4951	19.8249	19.4867
	0.424583	1.29401	Q9Y5J1	UTP18_HUMAN	UTP18	U3 small nucleolar RNA-associated protein 18 homolog	17.3291	20.7908	21.497	20.8819	21.1058	21.5112
	0.552193	1.29181	Q13573	SNW1_HUMAN	SNW1	SNW domain-containing protein 1	17.1835	14.5622	17.4576	16.8462	17.7602	18.4723
	0.478664	1.285	P10809	CH60_HUMAN	HSPD1	60 kDa heat shock protein, mitochondrial	21.8688	21.031	20.7403	21.2426	24.7231	21.5294
	0.585994	1.28185	Q92665	RT31_HUMAN	MRPS31	Small ribosomal subunit protein mS31	17.666	14.4808	15.6666	16.9305	17.8167	16.9118
	0.649324	1.27281	A0A024R4E5	A0A024R4E5_HUMAN	HDLBP	Isoform of Q00341, High density lipoprotein binding protein	17.1597	19.0057	19.3308	19.1843	20.917	19.2135
	0.455579	1.27011	P49327	FAS_HUMAN	FASN	Fatty acid synthase	20.0603	19.3189	19.8632	20.1631	23.3527	19.537
	0.504006	1.26903	Q9NV31	IMP3_HUMAN	IMP3	U3 small nucleolar ribonucleoprotein protein IMP3	16.0435	18.8964	19.5937	19.5988	19.0843	19.6577
	0.506745	1.25715	P39748	FEN1_HUMAN	FEN1	Flap endonuclease 1	19.2804	19.2222	18.3187	18.6323	22.167	19.7935
	0.437235	1.25575	Q9NY12;Q9NY12-2	GAR1_HUMAN	GAR1	H/ACA ribonucleoprotein complex subunit 1	16.9866	20.7543	20.5205	20.9429	20.3503	20.7353
	1.54758	1.25395	P0DI83	NARR_HUMAN	RAB34	Isoform of Q9BZG1, Ras-related protein Rab-34, isoform NARR	16.6048	17.1476	17.6132	18.2545	18.0461	18.8268
	0.562047	1.25307	Q14103;Q14103-2;Q14103-3;Q14103-4	HNRPD_HUMAN	HNRNPD	Heterogeneous nuclear ribonucleoprotein D0	21.0165	20.709	20.1191	20.7261	23.7624	21.1153
	0.487318	1.24354	P31948;P31948-2	STIP1_HUMAN	STIP1	Stress-induced-phosphoprotein 1	19.74	19.6164	18.7052	19.7436	22.7081	19.3405
	0.969321	1.22671	Q13151	ROA0_HUMAN	HNRNPA0	Heterogeneous nuclear ribonucleoprotein A0	19.0105	19.3462	20.4251	19.9989	21.2705	21.1925
	0.785429	1.20328	P13647	K2C5_HUMAN	KRT5	Keratin, type II cytoskeletal 5	23.5387	23.5938	22.5065	25.6387	23.8596	23.7505
	0.590664	1.20218	Q96DH6;Q96DH6-2	MSI2H_HUMAN	MSI2	RNA-binding protein Musashi homolog 2	16.7754	17.8836	18.5322	18.1609	20.434	18.2029
	0.599291	1.20012	P34931	HS71L_HUMAN	HSPA1L	Heat shock 70 kDa protein 1-like	19.2584	19.694	19.5596	19.6343	22.4645	20.0136
	0.351527	1.18355	Q8NHQ9	DDX55_HUMAN	DDX55	ATP-dependent RNA helicase DDX55	16.862	20.7899	21.2644	20.7517	20.694	21.0212
	0.479607	1.17183	P56182	RRP1_HUMAN	RRP1	Ribosomal RNA processing protein 1 homolog A	16.2141	19.3243	19.4603	19.5544	19.549	19.4107
	0.434976	1.16829	P35908	K22E_HUMAN	KRT2	Keratin, type II cytoskeletal 2 epidermal	27.4145	27.345	26.5364	30.4601	26.8169	27.5237
	0.389101	1.16792	P82675	RT05_HUMAN	MRPS5	Small ribosomal subunit protein uS5m	17.4489	18.1171	14.6704	18.5289	18.6909	16.5204
	0.92506	1.16716	P02538	K2C6A_HUMAN	KRT6A	Keratin, type II cytoskeletal 6A	21.5122	22.4862	21.1166	23.0863	23.4803	22.05
	0.941341	1.16202	P08779	K1C16_HUMAN	KRT16	Keratin, type I cytoskeletal 16	22.5518	23.6555	22.5827	24.7072	24.3512	23.2176
	0.321048	1.16181	Q07021	C1QBP_HUMAN	C1QBP	Complement component 1 Q subcomponent-binding protein, mitochondrial	20.8579	20.3918	20.2206	20.0871	24.5936	20.275
	0.615592	1.15563	P17987	TCPA_HUMAN	TCP1	T-complex protein 1 subunit alpha	20.0929	19.3343	19.5778	19.8558	22.4391	20.177
	0.500106	1.14946	P08240;P08240-2	SRPRA_HUMAN	SRPRA	Signal recognition particle receptor subunit alpha	16.6636	19.6751	19.2403	19.0845	20.3073	19.6357
	0.809076	1.14814	P16989;P16989-3	YBOX3_HUMAN	YBX3	Y-box-binding protein 3	21.8025	23.9361	22.2364	23.6584	23.9505	23.8104
	0.687041	1.14665	Q16540	RM23_HUMAN	MRPL23	Large ribosomal subunit protein uL23m	15.9258	17.8279	18.2639	18.0868	18.4306	18.9402
	0.303945	1.14325	Q4KMP7	TB10B_HUMAN	TBC1D10B	TBC1 domain family member 10B	18.5481	18.0297	14.2161	17.9588	16.9395	19.3253
	0.665379	1.12675	Q5T3I0;Q5T3I0-3	GPTC4_HUMAN	GPATCH4	G patch domain-containing protein 4	16.6922	18.8762	19.0471	19.1153	19.5338	19.3466
	0.43736	1.1232	Q99959-2	PKP2_HUMAN	PKP2	Isoform of Q99959, Isoform 1 of Plakophilin-2	15.7346	18.8483	19.1745	18.8975	19.2348	18.9948
	0.453681	1.11843	Q02413	DSG1_HUMAN	DSG1	Desmoglein-1	21.4522	20.0623	19.4594	23.0851	20.0572	21.1869
	0.546157	1.11796	P13645	K1C10_HUMAN	KRT10	Keratin, type I cytoskeletal 10	27.4328	26.9001	26.599	29.7514	26.7959	27.7385
	0.437951	1.10815	P42285	MTREX_HUMAN	MTREX	Exosome RNA helicase MTR4	15.0121	18.062	18.3874	18.1685	18.5489	18.0684
	0.992329	1.10618	Q8IY67-2	RAVR1_HUMAN	RAVER1	Isoform of Q8IY67, Isoform 2 of Ribonucleoprotein PTB-binding 1	16.9095	17.8721	17.8898	17.9628	19.3838	18.6433
	0.398076	1.10316	A0A2R8Y5A6;A0A2R8YDM9	A0A2R8Y5A6_HUMAN;A0A2R8YDM9_HUMAN	ATXN2	Isoform of Q99700, Ataxin 2	15.9652	18.6452	19.866	18.8528	19.5849	19.3482
	0.709402	1.0986	Q14978;Q14978-2	NOLC1_HUMAN	NOLC1	Nucleolar and coiled-body phosphoprotein 1	22.0141	23.4572	24.4478	24.4328	24.3483	24.4338
	0.289979	1.09487	Q99714;Q99714-2	HCD2_HUMAN	HSD17B10	3-hydroxyacyl-CoA dehydrogenase type-2	16.997	18.0972	19.6551	18.1172	21.9775	17.9391
	0.501051	1.09147	P40227	TCPZ_HUMAN	CCT6A	T-complex protein 1 subunit zeta	20.1336	19.613	19.4556	19.8779	22.6846	19.9141
	0.401484	1.08626	Q9Y3A2	UTP11_HUMAN	UTP11	Probable U3 small nucleolar RNA-associated protein 11	16.6306	20.1198	20.0027	20.0151	20.1035	19.8932
	0.452825	1.08155	Q16181;Q16181-2	SEPT7_HUMAN	SEPTIN7	Septin-7	19.9476	19.1014	17.4717	19.1543	21.3783	19.2328
	1.04871	1.07716	Q06210;Q06210-2	GFPT1_HUMAN	GFPT1	Glutamine--fructose-6-phosphate aminotransferase [isomerizing] 1	18.4013	19.0747	18.7895	19.1419	20.6538	19.7012
	0.517737	1.07668	P11234;P11234-2;P11234-3	RALB_HUMAN	RALB	Ras-related protein Ral-B	15.375	18.2475	17.7194	18.48	18.3612	17.7308
	0.438797	1.07124	P48643	TCPE_HUMAN	CCT5	T-complex protein 1 subunit epsilon	20.1421	20.1301	19.3159	20.2048	22.9312	19.6657
	0.295107	1.06219	P08238	HS90B_HUMAN	HSP90AB1	Heat shock protein HSP 90-beta	23.6489	22.8216	22.7305	22.892	26.9794	22.5162
	0.649757	1.05027	Q14739	LBR_HUMAN	LBR	Delta(14)-sterol reductase LBR	19.3946	18.5296	16.9191	19.1884	19.3129	19.4928
	0.550123	1.04349	Q96ST2;Q96ST2-2;Q96ST2-3	IWS1_HUMAN	IWS1	Protein IWS1 homolog	20.0282	21.6011	22.9293	22.577	22.6268	22.4853
	0.27422	1.04287	P52948;P52948-2;P52948-3;P52948-4;P52948-5;P52948-6	NUP98_HUMAN	NUP98	Nuclear pore complex protein Nup98-Nup96	19.5605	17.5267	14.4902	18.0824	18.987	17.6367
	0.349272	1.04204	Q12986	NFX1_HUMAN	NFX1	Transcriptional repressor NF-X1	16.4803	19.7041	20.5371	19.8583	19.9372	20.0521
	0.33407	1.03497	O75683	SURF6_HUMAN	SURF6	Surfeit locus protein 6	15.9654	19.9424	19.6177	19.4917	19.7073	19.4314
	0.706378	1.03174	P09382	LEG1_HUMAN	LGALS1	Galectin-1	21.9112	21.3917	21.3648	22.204	23.8416	21.7174
	0.583551	1.03077	Q8N1N4	K2C78_HUMAN	KRT78	Keratin, type II cytoskeletal 78	19.092	19.2366	18.9567	21.4388	18.7279	20.211
	0.47101	1.0305	Q96P70	IPO9_HUMAN	IPO9	Importin-9	16.8332	18.1985	18.352	18.0774	20.4546	17.9432
	0.33989	1.03027	Q8N531;Q8N531-2	FBXL6_HUMAN	FBXL6	F-box/LRR-repeat protein 6	16.0248	19.701	19.6914	19.499	19.0369	19.9722
	0.483753	1.02451	P17066	HSP76_HUMAN	HSPA6	Heat shock 70 kDa protein 6	20.5292	20.1509	20.2267	20.5632	23.1462	20.2708
	0.560447	1.0213	Q9BUF5	TBB6_HUMAN	TUBB6	Tubulin beta-6 chain	23.3616	23.2576	23.3064	23.6795	25.9361	23.3739
	0.316267	1.00259	P82673	RT35_HUMAN	MRPS35	Small ribosomal subunit protein mS35	17.7518	15.4353	14.877	15.1382	18.2084	17.7252
	0.492598	1.00226	O43813	LANC1_HUMAN	LANCL1	Glutathione S-transferase LANCL1	19.454	17.8308	18.6384	19.2414	21.1014	18.5872
	0.392714	1.00001	P60842	IF4A1_HUMAN	EIF4A1	Eukaryotic initiation factor 4A-I	20.4865	20.8352	21.0378	20.8263	23.9088	20.6245
	0.503604	0.995948	P58107	EPIPL_HUMAN	EPPK1	Epiplakin	18.5909	17.8286	18.3687	18.3895	20.9275	18.459
	0.790063	0.992612	Q8WVC0	LEO1_HUMAN	LEO1	RNA polymerase-associated protein LEO1	21.6276	23.4013	23.325	23.7879	23.8317	23.7122
	0.28023	0.992233	O43175	SERA_HUMAN	PHGDH	D-3-phosphoglycerate dehydrogenase	20.8582	20.4021	20.354	20.5104	24.3278	19.7528
	0.629399	0.9863	P09661	RU2A_HUMAN	SNRPA1	U2 small nuclear ribonucleoprotein A'	16.4872	18.2605	18.6679	18.4809	19.2248	18.6688
	0.51281	0.981681	O00541;O00541-2	PESC_HUMAN	PES1	Pescadillo homolog	20.7192	21.0553	21.2616	20.8534	21.533	23.5947
	0.818642	0.980522	Q14011	CIRBP_HUMAN	CIRBP	Cold-inducible RNA-binding protein	20.6434	20.1625	20.5254	20.4185	21.6087	22.2457
	0.399202	0.976813	O00566	MPP10_HUMAN	MPHOSPH10	U3 small nucleolar ribonucleoprotein protein MPP10	16.1681	19.1184	19.395	19.2449	19.0598	19.3072
	0.419279	0.973553	Q8WVM0	TFB1M_HUMAN	TFB1M	Dimethyladenosine transferase 1, mitochondrial	16.1375	15.8951	15.8068	14.9514	17.9285	17.8803
	0.46479	0.971828	P57678	GEMI4_HUMAN	GEMIN4	Gem-associated protein 4	16.5808	19.3123	19.2467	19.3183	19.2182	19.5187
	0.92858	0.960793	P47813	IF1AX_HUMAN	EIF1AX	Eukaryotic translation initiation factor 1A, X-chromosomal	20.5151	20.3842	20.0423	20.5936	22.1575	21.0728
	0.601027	0.954629	Q14119	VEZF1_HUMAN	VEZF1	Vascular endothelial zinc finger 1	16.9804	17.0054	18.6718	18.031	18.1069	19.3835
	0.41196	0.953065	P21333;P21333-2	FLNA_HUMAN	FLNA	Filamin-A	19.7669	19.0701	19.2447	19.5194	22.2259	19.1955
	0.419445	0.944162	P35613;P35613-2;P35613-3;P35613-4	BASI_HUMAN	BSG	Basigin	19.7799	19.0898	19.6015	19.6368	22.3013	19.3657
	1.02692	0.942185	Q04695	K1C17_HUMAN	KRT17	Keratin, type I cytoskeletal 17	19.9756	19.9223	19.951	21.281	21.3624	20.0321
	1.06095	0.941956	P36915	GNL1_HUMAN	GNL1	Guanine nucleotide-binding protein-like 1	19.0327	19.4277	19.4547	19.8172	21.0345	19.8892
	0.265631	0.939973	Q9H8H2	DDX31_HUMAN	DDX31	Probable ATP-dependent RNA helicase DDX31	15.9818	20.1985	20.1036	19.1971	19.8647	20.0421
	0.853006	0.938511	Q7Z460;Q7Z460-2;Q7Z460-3;Q7Z460-4;Q7Z460-5	CLAP1_HUMAN	CLASP1	CLIP-associating protein 1	15.7447	16.5823	16.8923	16.8052	18.0765	17.1531
	0.341206	0.937843	Q9BYJ9	YTHD1_HUMAN	YTHDF1	YTH domain-containing family protein 1	15.3909	18.4729	18.8202	18.4602	19.0791	17.9582
	0.528203	0.936981	Q14974	IMB1_HUMAN	KPNB1	Importin subunit beta-1	19.2974	19.1752	19.1251	19.4731	21.6889	19.2466
	0.657357	0.934122	Q9BYN8	RT26_HUMAN	MRPS26	Small ribosomal subunit protein mS26	16.4958	17.8867	18.6631	18.7561	18.4015	18.6905
	0.339006	0.933383	Q53GS9;Q53GS9-2	SNUT2_HUMAN	USP39	U4/U6.U5 tri-snRNP-associated protein 2	18.7313	17.6786	15.0782	17.4752	18.6505	18.1625
	0.934541	0.932708	Q9BQA1	MEP50_HUMAN	WDR77	Methylosome protein WDR77	19.8799	20.8031	21.2647	21.5479	21.9928	21.2051
	0.392093	0.931431	P49368	TCPG_HUMAN	CCT3	T-complex protein 1 subunit gamma	20.1006	19.5602	19.4119	19.8672	22.567	19.4328
	0.53307	0.924842	Q7KZF4	SND1_HUMAN	SND1	Staphylococcal nuclease domain-containing protein 1	19.6203	19.4013	20.2051	19.9723	22.1186	19.9103
	2.00949	0.922728	Q9UI10-3;Q9UI10-2	EI2BD_HUMAN	EIF2B4	Isoform of Q9UI10, Isoform 2 of Translation initiation factor eIF-2B subunit delta	19.3055	19.8043	19.7022	20.2712	20.6788	20.6302
	0.498731	0.921114	Q15646;Q15646-3	OASL_HUMAN	OASL	2'-5'-oligoadenylate synthase-like protein	15.2617	17.8032	17.4282	18.0555	17.617	17.5839
	0.179234	0.909252	P02545	LMNA_HUMAN	LMNA	Prelamin-A/C	19.3375	15.2106	18.6323	19.072	20.8963	15.9399
	0.862004	0.907744	P08237;P08237-2;P08237-3	PFKAM_HUMAN	PFKM	ATP-dependent 6-phosphofructokinase, muscle type	18.3127	18.6056	18.6759	18.9995	20.392	18.9259
	2.21963	0.90674	H0YBM7	H0YBM7_HUMAN	LARP1	Isoform of Q6PKG0, La ribonucleoprotein 1, translational regulator (Fragment)	16.4274	16.6336	16.742	17.3086	17.7864	17.4283
	0.435721	0.90592	P38646	GRP75_HUMAN	HSPA9	Stress-70 protein, mitochondrial	21.3763	21.1136	20.9802	21.326	23.8213	21.0406
	0.327189	0.90249	P50990	TCPQ_HUMAN	CCT8	T-complex protein 1 subunit theta	20.2521	20.0293	19.9653	20.0734	23.2331	19.6475
	0.408455	0.901965	O94915	FRYL_HUMAN	FRYL	Protein furry homolog-like	16.5206	15.4921	16.4605	18.3304	17.4693	15.3794
	1.96846	0.901414	O14744;O14744-5	ANM5_HUMAN	PRMT5	Protein arginine N-methyltransferase 5	19.9412	19.992	20.417	20.7633	21.1999	21.0914
	0.514156	0.898406	Q9NQ55;Q9NQ55-2;Q9NQ55-3	SSF1_HUMAN	PPAN	Suppressor of SWI4 1 homolog	17.4093	19.4986	19.8718	19.822	19.8161	19.8368
	0.412824	0.897873	Q96HY6;Q96HY6-2	DDRGK_HUMAN	DDRGK1	DDRGK domain-containing protein 1	16.9718	19.3945	19.9772	19.6026	19.8606	19.5739
	0.305906	0.8948	Q16576	RBBP7_HUMAN	RBBP7	Histone-binding protein RBBP7	20.1107	19.9088	19.5481	19.2628	23.0812	19.908
	0.338667	0.89367	Q9NVX2	NLE1_HUMAN	NLE1	Notchless protein homolog 1	16.0598	19.387	18.3643	18.558	19.7461	18.1881
	0.392869	0.889949	P08195;P08195-2;P08195-3;P08195-4;P08195-5	4F2_HUMAN	SLC3A2	4F2 cell-surface antigen heavy chain	21.9861	21.595	21.9159	22.0488	24.5951	21.523
	0.674192	0.889612	Q9P258	RCC2_HUMAN	RCC2	Protein RCC2	20.2529	20.1853	20.0819	20.1504	22.1861	20.8525
	0.193496	0.887857	Q969X5;Q969X5-2	ERGI1_HUMAN	ERGIC1	Endoplasmic reticulum-Golgi intermediate compartment protein 1	15.4156	17.0445	19.406	15.6542	20.1425	18.7329
	0.365005	0.884404	P23588;P23588-2	IF4B_HUMAN	EIF4B	Eukaryotic translation initiation factor 4B	19.2873	18.9437	17.9166	18.5804	21.4458	18.7746
	0.360079	0.883064	Q659C4	LAR1B_HUMAN	LARP1B	La-related protein 1B	16.5286	19.093	19.8652	19.4888	19.0488	19.5984
	0.311611	0.881742	P25786;P25786-2	PSA1_HUMAN	PSMA1	Proteasome subunit alpha type-1	18.5187	18.1159	17.7467	18.3141	21.2257	17.4867
	0.418305	0.873279	E7ERS3	E7ERS3_HUMAN	ZC3H18	Isoform of Q86VM9, Zinc finger CCCH-type containing 18	15.8521	18.3143	18.2969	17.8637	18.1855	19.0339
	0.441173	0.873136	Q15633;Q15633-2	TRBP2_HUMAN	TARBP2	RISC-loading complex subunit TARBP2	16.0769	18.3551	18.8197	18.7239	18.6215	18.5257
	0.391064	0.866134	P61978-2;P61978-3	HNRPK_HUMAN	HNRNPK	Isoform of P61978, Isoform 2 of Heterogeneous nuclear ribonucleoprotein K	22.0924	22.176	21.6885	21.7644	24.6854	22.1054
	0.187013	0.863784	P50579	MAP2_HUMAN	METAP2	Methionine aminopeptidase 2	15.0243	18.6864	17.9405	15.6713	20.3999	18.1714
	0.395098	0.863346	Q9BV38	WDR18_HUMAN	WDR18	WD repeat-containing protein 18	16.5189	19.0147	19.4294	19.5007	18.9725	19.0798
	0.5987	0.862986	P02533	K1C14_HUMAN	KRT14	Keratin, type I cytoskeletal 14	22.9001	22.7847	21.7143	24.3753	22.8233	22.7895
	0.428626	0.857289	Q9UHR5;Q9UHR5-2	S30BP_HUMAN	SAP30BP	SAP30-binding protein	16.1677	15.729	18.2247	17.2649	18.3058	17.1226
	0.619875	0.856174	Q9UN81	LORF1_HUMAN	L1RE1	LINE-1 retrotransposable element ORF1 protein	18.0911	20.0209	19.8295	20.2215	20.2985	19.9901
	0.248863	0.849192	Q5JVS0;Q5JVS0-2	HABP4_HUMAN	HABP4	Intracellular hyaluronan-binding protein 4	19.2729	15.2655	19.2512	18.8992	18.3411	19.0968
	0.496365	0.845315	P55060;P55060-3	XPO2_HUMAN	CSE1L	Exportin-2	20.402	20.1039	20.0162	20.0373	22.4553	20.5655
	1.90975	0.839976	Q9H7E9;Q9H7E9-2	CH033_HUMAN	C8orf33	UPF0488 protein C8orf33	20.5493	20.6372	20.987	21.3571	21.5044	21.832
	1.01502	0.837728	Q14738;Q14738-2;Q14738-3	2A5D_HUMAN	PPP2R5D	Serine/threonine-protein phosphatase 2A 56 kDa regulatory subunit delta isoform	19.2031	18.5642	18.5754	19.043	20.1671	19.6459
	0.902204	0.837615	Q14562	DHX8_HUMAN	DHX8	ATP-dependent RNA helicase DHX8	16.5542	16.1043	17.5267	17.7606	17.5451	17.3923
	0.525653	0.824373	O43852-2;O43852-4	CALU_HUMAN	CALU	Isoform of O43852, Isoform 2 of Calumenin	19.6528	19.0057	19.2907	19.1119	21.3822	19.9283
	0.654924	0.823716	P53618	COPB_HUMAN	COPB1	Coatomer subunit beta	18.3823	18.7028	18.8037	18.904	20.5628	18.8932
	0.627568	0.818523	Q9UKM9;Q9UKM9-2	RALY_HUMAN	RALY	RNA-binding protein Raly	20.2456	21.6768	22.0654	22.0021	22.5365	21.9046
	0.488757	0.817877	Q7L2J0	MEPCE_HUMAN	MEPCE	7SK snRNA methylphosphate capping enzyme	17.3994	18.8598	19.8414	19.2266	19.5245	19.803
	1.81416	0.817844	P15924	DESP_HUMAN	DSP	Desmoplakin	21.0225	20.7706	20.5305	21.3454	21.8401	21.5917
	0.512824	0.817702	P59190;P59190-2	RAB15_HUMAN	RAB15	Ras-related protein Rab-15	20.2178	19.6182	20.0947	20.3144	22.1268	19.9426
	0.603522	0.817023	Q7Z4V5	HDGR2_HUMAN	HDGFL2	Hepatoma-derived growth factor-related protein 2	21.3951	22.6151	23.4636	23.1842	23.4735	23.2673
	0.407946	0.808161	P02786	TFR1_HUMAN	TFRC	Transferrin receptor protein 1	22.0488	21.3888	21.4782	21.7299	24.0729	21.5374
	0.551981	0.805811	Q9Y4C8	RBM19_HUMAN	RBM19	Probable RNA-binding protein 19	17.8222	19.7004	19.8165	19.9376	19.8954	19.9235
	0.410076	0.79866	P42704	LPPRC_HUMAN	LRPPRC	Leucine-rich PPR motif-containing protein, mitochondrial	19.3469	18.4361	18.1319	18.6698	20.9213	18.7197
	0.463457	0.797449	Q9NY61	AATF_HUMAN	AATF	Protein AATF	15.5045	17.3486	17.9567	17.8129	17.5397	17.8496
	0.759187	0.791501	P04264	K2C1_HUMAN	KRT1	Keratin, type II cytoskeletal 1	27.2213	27.3049	26.9065	28.8468	27.3289	27.6315
	0.257863	0.790725	Q15366-3;Q15366-6	PCBP2_HUMAN	PCBP2	Isoform of Q15366, Isoform 3 of Poly(rC)-binding protein 2	19.1723	20.14	20.7071	19.8912	23.0524	19.4479
	0.414259	0.787857	O00410;O00410-3	IPO5_HUMAN	IPO5	Importin-5	20.0575	19.7336	20.1793	19.7546	22.3502	20.2292
	0.39291	0.781125	Q9H7E2;Q9H7E2-3	TDRD3_HUMAN	TDRD3	Tudor domain-containing protein 3	16.1886	18.4491	18.888	18.559	18.5473	18.7629
	0.674337	0.775583	Q9UQ80	PA2G4_HUMAN	PA2G4	Proliferation-associated protein 2G4	21.5566	21.9991	21.8875	22.1152	23.5994	22.0553
	0.445626	0.769704	Q6P158	DHX57_HUMAN	DHX57	Putative ATP-dependent RNA helicase DHX57	22.4849	23.9571	22.8545	24.4121	24.5162	22.6774
	0.552174	0.765776	Q5T749	KPRP_HUMAN	KPRP	Keratinocyte proline-rich protein	20.1338	20.0295	18.8437	20.8515	19.5281	20.9246
	0.669977	0.76181	P49006	MRP_HUMAN	MARCKSL1	MARCKS-related protein	19.7039	18.9779	18.9742	19.7036	20.8701	19.3677
	0.54462	0.750006	P40939	ECHA_HUMAN	HADHA	Trifunctional enzyme subunit alpha, mitochondrial	18.603	18.0008	18.134	18.3958	20.157	18.435
	0.881126	0.749147	Q9BVS4	RIOK2_HUMAN	RIOK2	Serine/threonine-protein kinase RIO2	19.6273	20.3798	20.9851	21.1137	20.9799	21.1461
	0.0812948	0.746244	Q9H1E3;Q9H1E3-2	NUCKS_HUMAN	NUCKS1	Nuclear ubiquitous casein and cyclin-dependent kinase substrate 1	22.9046	22.1116	14.4701	17.0927	23.1878	21.4445
	0.368117	0.745727	Q01780	EXOSX_HUMAN	EXOSC10	Exosome component 10	16.1674	18.1325	18.9171	18.7519	18.0459	18.6563
	0.427569	0.739988	P78344	IF4G2_HUMAN	EIF4G2	Eukaryotic translation initiation factor 4 gamma 2	17.4284	19.1938	19.3963	19.3151	20.1412	18.7822
	0.708565	0.739868	Q7L0Y3	TM10C_HUMAN	TRMT10C	tRNA methyltransferase 10 homolog C	19.9222	20.0677	20.8912	20.4587	21.7221	20.9198
	0.401849	0.731157	Q9UH99;Q9UH99-2;Q9UH99-3	SUN2_HUMAN	SUN2	SUN domain-containing protein 2	16.0591	17.9565	18.5167	17.908	18.2123	18.6055
	0.43166	0.730338	P31689;P31689-2	DNJA1_HUMAN	DNAJA1	DnaJ homolog subfamily A member 1	19.9292	19.0073	19.5819	19.7966	21.5566	19.3563
	2.09406	0.728422	Q9UQ35	SRRM2_HUMAN	SRRM2	Serine/arginine repetitive matrix protein 2	18.9932	19.1165	19.4855	19.9138	19.9577	19.909
	1.06355	0.720965	P63000;P63000-2	RAC1_HUMAN	RAC1	Ras-related C3 botulinum toxin substrate 1	21.4862	20.6376	21.3156	22.0041	22.0974	21.5009
	0.416065	0.720112	Q9BQE3	TBA1C_HUMAN	TUBA1C	Tubulin alpha-1C chain	24.7099	24.634	24.5436	24.6687	26.8181	24.561
	0.765027	0.717708	Q15650	TRIP4_HUMAN	TRIP4	Activating signal cointegrator 1	20.1394	21.0253	21.5617	21.4328	21.8464	21.6003
	0.38697	0.71036	Q15365	PCBP1_HUMAN	PCBP1	Poly(rC)-binding protein 1	20.6734	21.5218	21.7964	21.3676	23.4315	21.3236
	1.55715	0.707708	Q9NRX1	PNO1_HUMAN	PNO1	RNA-binding protein PNO1	20.6806	20.9013	21.3401	21.5707	21.6402	21.8342
	1.04608	0.701109	Q9UPN3;Q9UPN3-5	MACF1_HUMAN	MACF1	Microtubule-actin cross-linking factor 1, isoforms 1/2/3/4/5	17.3721	17.3852	16.825	17.7891	18.3804	17.5161
	0.515509	0.700354	Q5D862	FILA2_HUMAN	FLG2	Filaggrin-2	21.1563	20.4563	19.6559	21.8973	20.5068	20.9655
	0.257132	0.690798	Q9P2D0	IBTK_HUMAN	IBTK	Inhibitor of Bruton tyrosine kinase	16.2275	19.3462	19.5094	18.9884	19.122	19.0451
	0.705883	0.681266	Q6P1J9	CDC73_HUMAN	CDC73	Parafibromin	22.4727	23.6563	23.8239	24.0954	23.77	24.1313
	1.00769	0.681081	Q6NZI2	CAVN1_HUMAN	CAVIN1	Caveolae-associated protein 1	18.7307	19.0279	18.9059	19.4802	20.1366	19.0908
	0.448519	0.676434	P11021	BIP_HUMAN	HSPA5	Endoplasmic reticulum chaperone BiP	23.6381	23.7576	23.615	23.6718	25.641	23.7273
	0.98404	0.674648	Q9BX40-3	LS14B_HUMAN	LSM14B	Isoform of Q9BX40, Isoform 3 of Protein LSM14 homolog B	19.4935	19.6601	19.9756	20.0536	20.1401	20.9595
	0.787481	0.674411	O60841	IF2P_HUMAN	EIF5B	Eukaryotic translation initiation factor 5B	22.3729	22.857	23.6517	23.3845	23.829	23.6913
	0.363594	0.67292	P51572;P51572-2	BAP31_HUMAN	BCAP31	B-cell receptor-associated protein 31	21.0307	20.0907	19.2748	20.3064	21.9665	20.1421
	0.29718	0.672834	Q8N2M8;Q8N2M8-3	CLASR_HUMAN	CLASRP	CLK4-associating serine/arginine rich protein	17.1189	15.8688	15.4898	15.3337	17.9281	17.2342
	0.332756	0.667871	P04792	HSPB1_HUMAN	HSPB1	Heat shock protein beta-1	22.5442	21.9527	22.0379	22.0476	24.459	22.0318
	0.921387	0.660353	Q6PD62	CTR9_HUMAN	CTR9	RNA polymerase-associated protein CTR9 homolog	22.449	23.4331	23.4593	23.8527	23.7383	23.7315
	0.506885	0.659164	O14979	HNRDL_HUMAN	HNRNPDL	Heterogeneous nuclear ribonucleoprotein D-like	20.7637	20.6616	20.7967	20.7101	22.5258	20.9636
	0.359343	0.658021	O43159	RRP8_HUMAN	RRP8	Ribosomal RNA-processing protein 8	16.6502	18.5893	19.0503	18.6535	18.4627	19.1477
	0.301236	0.656076	P05023;P05023-4;P05023-3	AT1A1_HUMAN	ATP1A1	Sodium/potassium-transporting ATPase subunit alpha-1	18.9358	18.2108	17.9903	18.4347	20.6902	17.9803
	0.758786	0.651328	Q5T5U3	RHG21_HUMAN	ARHGAP21	Rho GTPase-activating protein 21	16.6923	17.586	18.0097	17.9442	18.1154	18.1824
	0.472045	0.651098	O75822	EIF3J_HUMAN	EIF3J	Eukaryotic translation initiation factor 3 subunit J	20.7492	20.4206	21.4067	20.9885	22.5553	20.9859
	0.307758	0.649628	Q8TDM6;Q8TDM6-4	DLG5_HUMAN	DLG5	Disks large homolog 5	16.4074	18.4825	19.2975	18.6745	18.721	18.7408
	0.808045	0.632912	Q8N7H5;Q8N7H5-3	PAF1_HUMAN	PAF1	RNA polymerase II-associated factor 1 homolog	23.1481	24.1575	24.2573	24.575	24.3361	24.5505
	0.431097	0.631828	P52597	HNRPF_HUMAN	HNRNPF	Heterogeneous nuclear ribonucleoprotein F	21.117	21.8625	21.8511	21.6047	23.3927	21.7287
	0.53794	0.630837	Q5QJE6	TDIF2_HUMAN	DNTTIP2	Deoxynucleotidyltransferase terminal-interacting protein 2	16.3314	17.5936	17.9512	17.6098	18.0043	18.1546
	0.363374	0.630402	P0DMV8;P0DMV8-2;P0DMV9	HS71A_HUMAN;HS71B_HUMAN	HSPA1A;HSPA1B	Heat shock 70 kDa protein 1A	22.0945	21.9572	21.8408	22.0005	24.0284	21.7547
	0.292233	0.630008	Q99590;Q99590-2	SCAFB_HUMAN	SCAF11	Protein SCAF11	15.8318	18.2464	18.5498	18.2113	18.4075	17.8992
	1.13261	0.629437	Q9UJV9	DDX41_HUMAN	DDX41	Probable ATP-dependent RNA helicase DDX41	19.0402	19.2547	19.8844	19.9119	20.1343	20.0214
	0.470275	0.628878	Q8NB90	AFG2A_HUMAN	AFG2A	ATPase family gene 2 protein homolog A	16.2296	16.523	17.7758	17.1504	18.1368	17.1277
	0.283025	0.617431	P24534	EF1B_HUMAN	EEF1B2	Elongation factor 1-beta	22.4763	21.5465	21.1436	21.6259	23.9084	21.4843
	0.4745	0.611238	Q92499	DDX1_HUMAN	DDX1	ATP-dependent RNA helicase DDX1	20.2137	20.9257	21.9307	21.1493	21.753	22.0016
	0.314295	0.605818	Q15293	RCN1_HUMAN	RCN1	Reticulocalbin-1	21.5416	21.15	21.0144	20.9995	23.3833	21.1408
	0.321955	0.604731	Q9Y4P3	TBL2_HUMAN	TBL2	Transducin beta-like protein 2	17.2137	19.2308	19.7248	19.4533	19.2614	19.2688
	1.44947	0.604094	Q9BRS2	RIOK1_HUMAN	RIOK1	Serine/threonine-protein kinase RIO1	21.2477	21.7388	21.8438	22.1646	22.3357	22.1422
	0.62105	0.603568	Q9UBQ5	EIF3K_HUMAN	EIF3K	Eukaryotic translation initiation factor 3 subunit K	21.7848	22.3078	23.1207	22.98	23.3669	22.6771
	0.882633	0.602872	Q6NUQ4;Q6NUQ4-2	TM214_HUMAN	TMEM214	Transmembrane protein 214	18.3374	19.002	19.3538	19.3991	19.3793	19.7233
	0.813458	0.602155	Q5VW36	FOCAD_HUMAN	FOCAD	Focadhesin	17.7452	18.6372	18.2807	18.4304	19.2062	18.8331
	1.32222	0.598409	O75533	SF3B1_HUMAN	SF3B1	Splicing factor 3B subunit 1	18.4271	18.9323	19.1208	19.3446	19.4989	19.4319
	0.436119	0.59249	Q9Y3T9	NOC2L_HUMAN	NOC2L	Nucleolar complex protein 2 homolog	16.7214	18.0147	18.5455	18.779	18.1233	18.1568
	1.18273	0.590276	P37108	SRP14_HUMAN	SRP14	Signal recognition particle 14 kDa protein	22.6695	23.3659	23.1252	23.4177	23.7984	23.7153
	0.914218	0.587419	P49458	SRP09_HUMAN	SRP9	Signal recognition particle 9 kDa protein	21.5334	22.2186	22.3766	22.328	22.8062	22.7567
	1.01587	0.586439	Q9BRZ2	TRI56_HUMAN	TRIM56	E3 ubiquitin-protein ligase TRIM56	19.2675	20.0987	20.0491	20.331	20.4329	20.4107
	0.544294	0.584042	P0CG39	POTEJ_HUMAN	POTEJ	POTE ankyrin domain family member J	17.4157	18.3557	18.9812	18.9199	19.0121	18.5725
	0.184656	0.581329	Q96KP1	EXOC2_HUMAN	EXOC2	Exocyst complex component 2	16.3942	14.7417	15.9309	17.4285	17.3017	14.0806
	0.175297	0.581159	O95302;O95302-3	FKBP9_HUMAN	FKBP9	Peptidyl-prolyl cis-trans isomerase FKBP9	16.3201	15.885	15.9818	14.9832	19.0926	15.8547
	0.390927	0.570348	Q99459	CDC5L_HUMAN	CDC5L	Cell division cycle 5-like protein	18.1044	19.7801	20.0529	19.7245	19.8966	20.0272
	0.159504	0.569855	Q9Y2R4	DDX52_HUMAN	DDX52	Probable ATP-dependent RNA helicase DDX52	15.4886	19.0513	19.2441	19.0282	17.3917	19.0737
	0.276841	0.567891	O14939;O14939-3;O14939-4	PLD2_HUMAN	PLD2	Phospholipase D2	17.1493	16.4767	17.1565	19.0735	16.8377	16.5751
	0.388101	0.565727	Q08J23;Q08J23-2	NSUN2_HUMAN	NSUN2	RNA cytosine C(5)-methyltransferase NSUN2	19.726	20.9887	21.2587	20.9339	22.0005	20.7363
	0.43736	0.56196	Q01082	SPTB2_HUMAN	SPTBN1	Spectrin beta chain, non-erythrocytic 1	19.3548	19.1352	19.9427	19.5611	21.0299	19.5277
	0.96811	0.561038	Q96EY4	TMA16_HUMAN	TMA16	Translation machinery-associated protein 16	21.1318	21.8019	21.3156	21.756	21.8345	22.3419
	1.40403	0.555187	A8MWD9;P62308	RUXGL_HUMAN;RUXG_HUMAN	SNRPG;SNRPGP15	Putative small nuclear ribonucleoprotein G-like protein 15	18.313	18.5576	18.8815	19.2121	19.2315	18.9741
	0.298927	0.553895	P68104;Q5VTE0	EF1A1_HUMAN;EF1A3_HUMAN	EEF1A1;EEF1A1P5	Elongation factor 1-alpha 1	25.5247	25.0205	24.627	24.7522	27.0114	25.0703
	0.426596	0.550298	P17096;P17096-3	HMGA1_HUMAN	HMGA1	High mobility group protein HMG-I/HMG-Y	22.351	22.5052	22.1445	22.0178	22.7552	23.8786
	0.536814	0.548597	Q92841	DDX17_HUMAN	DDX17	Probable ATP-dependent RNA helicase DDX17	20.9769	21.4361	22.1904	21.7784	22.6412	21.8296
	0.478995	0.542491	Q14444;Q14444-2	CAPR1_HUMAN	CAPRIN1	Caprin-1	22.2829	21.6616	21.2551	21.5669	22.9145	22.3457
	0.160394	0.53562	G3V1Y7	G3V1Y7_HUMAN	MYL6	Isoform of P60660, Myosin light chain 6	18.3345	14.5463	16.399	17.4592	17.6841	15.7432
	0.786712	0.534846	A0A140T912;A0A140T930;A0A140T937;A0A1W2PRZ0;O78179	A0A140T912_HUMAN;A0A140T930_HUMAN;A0A140T937_HUMAN;A0A1W2PRZ0_HUMAN;O78179_HUMAN	HLA-C	Isoform of P10321, HLA class I histocompatibility antigen, C alpha chain	19.4865	19.0837	19.36	19.8796	20.3295	19.3256
	0.400797	0.534022	Q6ZRV2	FA83H_HUMAN	FAM83H	Protein FAM83H	16.0897	17.576	17.8488	17.9712	17.6452	17.5001
	0.427622	0.530851	O00425	IF2B3_HUMAN	IGF2BP3	Insulin-like growth factor 2 mRNA-binding protein 3	22.5121	23.9298	24.2267	24.0107	24.115	24.1355
	0.173648	0.525022	Q9H6S0	YTDC2_HUMAN	YTHDC2	3'-5' RNA helicase YTHDC2	19.9879	23.0085	21.6805	21.5653	21.1431	23.5436
	0.270996	0.524785	P46940	IQGA1_HUMAN	IQGAP1	Ras GTPase-activating-like protein IQGAP1	21.8097	21.1083	20.3314	20.8633	22.8981	21.0623
	0.368836	0.521746	Q5VYK3	ECM29_HUMAN	ECPAS	Proteasome adapter and scaffold protein ECM29	18.4739	18.5386	18.1193	18.2085	20.0455	18.4431
	0.282454	0.520548	Q8N3V7-2	SYNPO_HUMAN	SYNPO	Isoform of Q8N3V7, Isoform 2 of Synaptopodin	17.9945	19.7358	20.4715	20.1318	19.7689	19.8629
	0.266961	0.519543	Q00610;Q00610-2	CLH1_HUMAN	CLTC	Clathrin heavy chain 1	21.5778	20.6503	20.611	21.1156	22.8345	20.4477
	0.308097	0.518613	Q9UPQ9;Q9UPQ9-1;Q9UPQ9-2	TNR6B_HUMAN	TNRC6B	Trinucleotide repeat-containing gene 6B protein	16.1927	17.5849	18.4895	18.2414	17.8736	17.708
	0.131879	0.517057	Q15393	SF3B3_HUMAN	SF3B3	Splicing factor 3B subunit 3	17.1962	16.1457	19.2572	18.2616	19.8686	16.0201
	0.9014	0.516182	Q01813	PFKAP_HUMAN	PFKP	ATP-dependent 6-phosphofructokinase, platelet type	20.4173	20.5044	20.2436	20.5774	21.409	20.7273
	0.29301	0.51481	P05204	HMGN2_HUMAN	HMGN2	Non-histone chromosomal protein HMG-17	21.7774	21.3229	20.9327	20.7336	21.7979	23.0459
	0.440985	0.513471	O15372	EIF3H_HUMAN	EIF3H	Eukaryotic translation initiation factor 3 subunit H	21.9186	22.8419	23.5661	23.2758	23.5547	23.0365
	0.369141	0.512263	P31943	HNRH1_HUMAN	HNRNPH1	Heterogeneous nuclear ribonucleoprotein H	21.8728	22.282	22.456	22.3014	23.8134	22.0327
	0.605669	0.508437	P53621	COPA_HUMAN	COPA	Coatomer subunit alpha	20.4707	20.2934	20.8894	20.6662	21.7199	20.7927
	1.26463	0.506346	Q96GA3	LTV1_HUMAN	LTV1	Protein LTV1 homolog	21.6575	22.1255	22.282	22.5448	22.5098	22.5295
	0.501536	0.505539	Q9NVP1	DDX18_HUMAN	DDX18	ATP-dependent RNA helicase DDX18	18.8168	19.7684	19.9749	19.9322	19.6317	20.5129
	0.399407	0.505448	Q92552;Q92552-2	RT27_HUMAN	MRPS27	Small ribosomal subunit protein mS27	18.5924	20.0946	20.2776	20.2097	20.194	20.0774
	0.18223	0.503565	Q9NQC3;Q9NQC3-2;Q9NQC3-5	RTN4_HUMAN	RTN4	Reticulon-4	19.6919	18.4618	18.6167	18.2656	21.3726	18.643
	0.505135	0.50212	P23246	SFPQ_HUMAN	SFPQ	Splicing factor, proline- and glutamine-rich	22.0576	22.5936	23.2826	22.7343	23.6031	23.1027
	0.406399	0.491769	Q9Y230	RUVB2_HUMAN	RUVBL2	RuvB-like 2	19.2878	19.2562	19.2796	19.1588	20.7865	19.3536
	0.320548	0.491615	Q13561;Q13561-2;Q13561-3	DCTN2_HUMAN	DCTN2	Dynactin subunit 2	19.2498	18.7346	18.7828	18.7106	20.6226	18.9089
	0.962525	0.490918	P35659	DEK_HUMAN	DEK	Protein DEK	21.3889	21.3009	21.0745	21.3148	21.8863	22.0359
	0.360616	0.485219	P35232	PHB1_HUMAN	PHB1	Prohibitin 1	21.2288	19.5298	20.3162	20.978	21.2321	20.3205
	0.314028	0.484931	Q13813;Q13813-2	SPTN1_HUMAN	SPTAN1	Spectrin alpha chain, non-erythrocytic 1	19.8977	19.4468	20.3401	19.9617	21.5189	19.6587
	0.508296	0.484717	Q8N3C0	ASCC3_HUMAN	ASCC3	Activating signal cointegrator 1 complex subunit 3	21.0038	21.9566	22.4099	22.172	22.3213	22.3312
	0.618827	0.484009	Q15233	NONO_HUMAN	NONO	Non-POU domain-containing octamer-binding protein	22.4842	22.8098	23.4142	22.983	23.7488	23.4284
	0.410398	0.483947	Q7Z794	K2C1B_HUMAN	KRT77	Keratin, type II cytoskeletal 1b	20.3548	19.2848	18.9022	19.869	19.6458	20.4788
	0.465972	0.483919	Q9UG63;Q9UG63-2	ABCF2_HUMAN	ABCF2	ATP-binding cassette sub-family F member 2	20.0863	21.1229	21.5481	21.2108	21.6101	21.3882
	0.654283	0.483741	O00468-3;O00468-6	AGRIN_HUMAN	AGRN	Isoform of O00468, Isoform 3 of Agrin	16.9546	16.2084	17.3305	17.3637	17.3781	17.2028
	1.12863	0.483673	P55081	MFAP1_HUMAN	MFAP1	Microfibrillar-associated protein 1	22.5429	21.8888	22.0575	22.6857	22.7006	22.5538
	1.2361	0.483507	P09234	RU1C_HUMAN	SNRPC	U1 small nuclear ribonucleoprotein C	21.2867	21.6177	21.4886	21.7431	22.2551	21.8454
	0.380762	0.482978	Q9H1I8	ASCC2_HUMAN	ASCC2	Activating signal cointegrator 1 complex subunit 2	19.9198	20.9413	21.7379	21.4214	21.1794	21.4472
	0.182578	0.482438	Q92734;Q92734-2	TFG_HUMAN	TFG	Protein TFG	19.5315	19.4091	20.5124	19.3887	22.1881	19.3236
	0.268873	0.479862	O75477	ERLN1_HUMAN	ERLIN1	Erlin-1	17.2021	18.413	18.6814	19.3207	18.9119	17.5035
	0.31328	0.478996	Q9GZP8;Q9GZP8-2	IMUP_HUMAN	IMUP	Immortalization up-regulated protein	21.6251	20.9507	20.0925	20.6216	22.1457	21.338
	0.390808	0.477423	P68366;P68366-2	TBA4A_HUMAN	TUBA4A	Tubulin alpha-4A chain	22.4239	22.2144	22.0986	22.1925	23.7355	22.2412
	1.10293	0.476093	Q5M775;Q5M775-4	CYTSB_HUMAN	SPECC1	Cytospin-B	18.0648	18.3127	18.3531	18.4831	19.0772	18.5987
	1.49084	0.474987	O14974;O14974-2;O14974-5	MYPT1_HUMAN	PPP1R12A	Protein phosphatase 1 regulatory subunit 12A	20.7026	20.4807	20.6536	21.0893	21.3137	20.8589
	0.215225	0.473914	P27816;P27816-6	MAP4_HUMAN	MAP4	Microtubule-associated protein 4	20.6099	19.5495	18.9435	19.2146	21.5461	19.7639
	0.367783	0.473616	Q8N684;Q8N684-2;Q8N684-3	CPSF7_HUMAN	CPSF7	Cleavage and polyadenylation specificity factor subunit 7	20.3874	19.7396	20.6057	20.0053	21.6091	20.5391
	0.207437	0.471945	P11142	HSP7C_HUMAN	HSPA8	Heat shock cognate 71 kDa protein	24.4198	23.5735	23.7868	23.6588	26.08	23.4572
	0.106668	0.471795	O00567	NOP56_HUMAN	NOP56	Nucleolar protein 56	15.3245	18.9177	19.8503	19.4374	16.9062	19.1643
	0.37358	0.471604	O15511;O15511-2	ARPC5_HUMAN	ARPC5	Actin-related protein 2/3 complex subunit 5	19.8261	19.1607	19.1777	19.3682	20.8229	19.3883
	0.117661	0.469733	Q9P015	RM15_HUMAN	MRPL15	Large ribosomal subunit protein uL15m	15.3341	18.7117	19.2394	19.0055	16.6635	19.0254
	0.422633	0.469112	Q00059	TFAM_HUMAN	TFAM	Transcription factor A, mitochondrial	21.0928	20.6394	19.779	20.4529	21.0761	21.3894
	1.20498	0.466811	Q9BRJ6	CG050_HUMAN	C7orf50	Uncharacterized protein C7orf50	24.5954	25.0693	24.6197	25.1675	25.0991	25.4183
	0.679319	0.465917	Q9Y3Y2;Q9Y3Y2-3;Q9Y3Y2-4	CHTOP_HUMAN	CHTOP	Chromatin target of PRMT1 protein	17.553	16.9637	16.6097	17.4401	17.2952	17.7887
	0.36687	0.465425	P63208	SKP1_HUMAN	SKP1	S-phase kinase-associated protein 1	18.7664	18.5361	18.6804	18.4137	20.1529	18.8127
	0.563133	0.461662	Q96DA6;Q96DA6-2	TIM14_HUMAN	DNAJC19	Mitochondrial import inner membrane translocase subunit TIM14	18.1423	18.5503	19.1665	18.684	19.3948	19.1652
	0.48315	0.459005	Q9NZI8	IF2B1_HUMAN	IGF2BP1	Insulin-like growth factor 2 mRNA-binding protein 1	22.6743	23.8722	23.9492	23.9328	23.952	23.9878
	0.426493	0.45859	Q7Z2W4	ZCCHV_HUMAN	ZC3HAV1	Zinc finger CCCH-type antiviral protein 1	21.078	22.304	22.5635	22.3804	22.4957	22.4452
	0.409708	0.456339	P07437	TBB5_HUMAN	TUBB	Tubulin beta chain	24.6977	24.5683	24.5287	24.6041	25.9948	24.5648
	0.323664	0.456211	Q92900	RENT1_HUMAN	UPF1	Regulator of nonsense transcripts 1	18.5639	19.2718	18.8266	19.1931	20.3461	18.4917
	0.465313	0.455944	P35251;P35251-2	RFC1_HUMAN	RFC1	Replication factor C subunit 1	19.6224	20.7597	20.9904	20.9046	20.8699	20.9658
	0.298772	0.454116	P26640	SYVC_HUMAN	VARS1	Valine--tRNA ligase	20.9255	20.0771	19.319	20.1456	21.3748	20.1636
	0.648016	0.45348	P20042	IF2B_HUMAN	EIF2S2	Eukaryotic translation initiation factor 2 subunit 2	22.1183	22.1186	22.0166	22.2934	23.162	22.1585
	0.226432	0.44997	P29692;P29692-2	EF1D_HUMAN	EEF1D	Elongation factor 1-delta	23.1535	22.3712	21.6956	22.3073	24.1581	22.1048
	0.608693	0.446489	P05455	LA_HUMAN	SSB	Lupus La protein	22.0385	22.7397	22.4781	22.6404	23.3791	22.5763
	1.73135	0.446213	P57737-3;Q9Y3D7	CORO7_HUMAN;TIM16_HUMAN	CORO7;PAM16	Isoform of P57737, Isoform 3 of Coronin-7	20.1517	19.9358	19.9349	20.2713	20.554	20.5357
	1.77355	0.443793	Q8WVK2	SNR27_HUMAN	SNRNP27	U4/U6.U5 small nuclear ribonucleoprotein 27 kDa protein	19.9767	20.0009	19.957	20.2922	20.3295	20.6443
	0.300329	0.442687	P68371	TBB4B_HUMAN	TUBB4B	Tubulin beta-4B chain	23.1372	22.2981	22.2789	22.5762	24.0648	22.4012
	0.823241	0.437942	Q96EY1;Q96EY1-2	DNJA3_HUMAN	DNAJA3	DnaJ homolog subfamily A member 3, mitochondrial	19.2534	18.6391	18.7482	19.0108	19.5346	19.4091
	1.00837	0.436303	Q13895	BYST_HUMAN	BYSL	Bystin	21.3362	21.7338	21.9762	21.9919	22.0965	22.2667
	0.370147	0.433746	O14579	COPE_HUMAN	COPE	Coatomer subunit epsilon	19.5419	20.2503	20.7391	20.3556	21.2956	20.1814
	0.543854	0.432943	Q9H2U1;Q9H2U1-2;Q9H2U1-3	DHX36_HUMAN	DHX36	ATP-dependent DNA/RNA helicase DHX36	18.4402	19.0933	19.6497	19.4488	19.5733	19.4599
	0.280938	0.432498	O00178	GTPB1_HUMAN	GTPBP1	GTP-binding protein 1	17.8596	17.6605	17.8036	17.2123	19.3364	18.0726
	0.922049	0.432199	Q99735;Q99735-2	MGST2_HUMAN	MGST2	Microsomal glutathione S-transferase 2	17.9123	18.112	18.3305	18.8334	18.6092	18.2088
	0.466518	0.429028	Q8WXX5	DNJC9_HUMAN	DNAJC9	DnaJ homolog subfamily C member 9	22.6153	23.645	23.9195	23.7709	23.8363	23.8595
	0.590506	0.426812	Q9UGY1	NOL12_HUMAN	NOL12	Nucleolar protein 12	19.0189	18.6832	19.7137	19.3456	19.6916	19.659
	0.261155	0.422183	Q8TEQ6	GEMI5_HUMAN	GEMIN5	Gem-associated protein 5	18.4858	17.7559	17.0442	17.325	19.0287	18.1988
	1.09581	0.421928	P21127;P21127-2;P21127-3;P21127-8	CD11B_HUMAN	CDK11B	Cyclin-dependent kinase 11B	18.796	19.3497	19.2447	19.484	19.6777	19.4945
	1.41586	0.416229	Q9H0D6	XRN2_HUMAN	XRN2	5'-3' exoribonuclease 2	20.1581	20.5165	20.32	20.6252	20.6962	20.9218
	0.301391	0.412552	O43143	DHX15_HUMAN	DHX15	ATP-dependent RNA helicase DHX15	19.9615	21.0396	21.6064	20.8078	21.7679	21.2694
	0.394797	0.411775	P55735;P55735-2;P55735-3;P55735-4	SEC13_HUMAN	SEC13	Protein SEC13 homolog	19.1017	18.6913	18.7437	18.6267	20.0566	19.0889
	0.484934	0.406743	Q99733;Q99733-2	NP1L4_HUMAN	NAP1L4	Nucleosome assembly protein 1-like 4	20.5549	21.0669	20.6534	20.6791	21.7933	21.023
	0.494654	0.405313	Q13310-3	PABP4_HUMAN	PABPC4	Isoform of Q13310, Isoform 3 of Polyadenylate-binding protein 4	23.6513	24.4736	24.7546	24.8352	24.8312	24.429
	0.453866	0.405263	Q1KMD3	HNRL2_HUMAN	HNRNPUL2	Heterogeneous nuclear ribonucleoprotein U-like protein 2	16.8631	16.9371	15.9719	16.5824	17.3681	17.0375
	0.297009	0.405162	Q9Y262	EIF3L_HUMAN	EIF3L	Eukaryotic translation initiation factor 3 subunit L	22.3162	23.3695	24.209	23.7086	23.8392	23.5625
	0.518337	0.4051	O60506;O60506-2	HNRPQ_HUMAN	SYNCRIP	Heterogeneous nuclear ribonucleoprotein Q	22.6306	22.3169	21.9657	22.1466	23.061	22.9209
	0.729188	0.402834	P51398;P51398-2;P51398-3	RT29_HUMAN	DAP3	Small ribosomal subunit protein mS29	19.1376	19.9295	19.7495	19.8672	20.1481	20.0098
	0.626218	0.394349	Q15397	PUM3_HUMAN	PUM3	Pumilio homolog 3	19.7868	20.614	20.6048	20.7507	20.8416	20.5964
	1.76297	0.392767	O95470	SGPL1_HUMAN	SGPL1	Sphingosine-1-phosphate lyase 1	19.7974	20.0598	20.0476	20.2581	20.4287	20.3962
	0.6678	0.388414	P79522;P79522-2	PRR3_HUMAN	PRR3	Proline-rich protein 3	18.2759	18.6036	19.0089	19.0921	18.7165	19.245
	1.11187	0.384089	Q7L4I2;Q7L4I2-2	RSRC2_HUMAN	RSRC2	Arginine/serine-rich coiled-coil protein 2	21.5576	21.1464	21.0789	21.6606	21.7461	21.5285
	0.414813	0.382547	Q53EL6;Q53EL6-2	PDCD4_HUMAN	PDCD4	Programmed cell death protein 4	22.2074	23.1844	23.5108	23.3958	23.3425	23.3119
	0.318809	0.38148	O94964;O94964-2	SOGA1_HUMAN	SOGA1	Protein SOGA1	16.9632	18.3459	18.4014	18.0559	18.2667	18.5325
	0.447469	0.379618	Q9UNX3	RL26L_HUMAN	RPL26L1	Ribosomal protein uL24-like	25.5056	25.1265	25.1163	25.2951	25.2799	26.3123
	0.225585	0.379308	Q01650	LAT1_HUMAN	SLC7A5	Large neutral amino acids transporter small subunit 1	23.101	22.2256	22.2778	22.2795	24.0993	22.3635
	0.278163	0.375181	Q8WWK9-5	CKAP2_HUMAN	CKAP2	Isoform of Q8WWK9, Isoform 3 of Cytoskeleton-associated protein 2	17.8722	19.4061	19.5344	19.3773	19.1273	19.4336
	0.434457	0.372763	Q86XZ4	SPAS2_HUMAN	SPATS2	Spermatogenesis-associated serine-rich protein 2	21.5569	22.6591	22.6337	22.6867	22.7331	22.5482
	3.62601	0.371982	Q15287;Q15287-2;Q15287-3	RNPS1_HUMAN	RNPS1	RNA-binding protein with serine-rich domain 1	20.9147	20.8886	20.8627	21.2097	21.2927	21.2795
	0.324685	0.370703	O95816	BAG2_HUMAN	BAG2	BAG family molecular chaperone regulator 2	20.2432	20.2371	20.0375	20.2321	21.4562	19.9416
	0.601073	0.370357	P60953	CDC42_HUMAN	CDC42	Cell division control protein 42 homolog	20.5611	20.9184	20.9794	20.9696	21.6755	20.925
	1.72981	0.368935	Q8NAV1	PR38A_HUMAN	PRPF38A	Pre-mRNA-splicing factor 38A	20.6731	20.9152	20.8428	21.2405	21.0507	21.2466
	0.596655	0.368629	P07305;P07305-2	H10_HUMAN	H1-0	Histone H1.0	19.9439	20.7999	20.694	20.8322	20.9613	20.7502
	0.0929651	0.368116	P35998	PRS7_HUMAN	PSMC2	26S proteasome regulatory subunit 7	15.2447	17.8725	17.9466	15.9861	19.5548	16.6271
	0.183728	0.367441	Q9BQG0;Q9BQG0-2	MBB1A_HUMAN	MYBBP1A	Myb-binding protein 1A	17.6947	19.8085	20.1218	19.5998	19.5368	19.5907
	0.563691	0.366158	Q01844;Q01844-3;Q01844-5;Q01844-6	EWS_HUMAN	EWSR1	RNA-binding protein EWS	24.8501	25.3646	25.8229	25.7601	25.5833	25.7927
	0.435986	0.365184	Q63HN8;Q63HN8-4	RN213_HUMAN	RNF213	E3 ubiquitin-protein ligase RNF213	16.4511	17.3679	17.4944	17.1861	17.5673	17.6555
	0.717275	0.364796	O94874	UFL1_HUMAN	UFL1	E3 UFM1-protein ligase 1	19.1532	19.5914	19.9377	19.8611	19.8907	20.0249
	0.797809	0.36016	Q14244;Q14244-3	MAP7_HUMAN	MAP7	Ensconsin	21.7044	21.4668	21.8542	22.3807	21.916	21.8092
	0.413513	0.359338	P26196	DDX6_HUMAN	DDX6	Probable ATP-dependent RNA helicase DDX6	19.7476	20.2945	20.9579	20.5628	20.9299	20.5854
	0.194961	0.358011	Q9P287;Q9P287-2;Q9P287-3;Q9P287-4	BCCIP_HUMAN	BCCIP	BRCA2 and CDKN1A-interacting protein	15.7282	17.1347	17.9496	16.9546	17.8418	17.0902
	0.610214	0.357481	Q9H0A0	NAT10_HUMAN	NAT10	RNA cytidine acetyltransferase	21.0025	21.7299	21.8227	21.7911	21.9091	21.9273
	0.407017	0.356883	Q14152	EIF3A_HUMAN	EIF3A	Eukaryotic translation initiation factor 3 subunit A	22.5798	23.2291	23.8549	23.6091	23.4732	23.6522
	1.48269	0.355072	Q13247;Q13247-3	SRSF6_HUMAN	SRSF6	Serine/arginine-rich splicing factor 6	24.8294	25.0204	25.1368	25.3117	25.4783	25.2619
	0.605485	0.354853	P43307	SSRA_HUMAN	SSR1	Translocon-associated protein subunit alpha	20.8949	21.2924	21.4133	21.3987	21.9725	21.2941
	1.07702	0.352304	Q9UHX1-2;Q9UHX1-4;Q9UHX1-6	PUF60_HUMAN	PUF60	Isoform of Q9UHX1, Isoform 2 of Poly(U)-binding-splicing factor PUF60	22.2841	22.172	22.1677	22.4829	22.848	22.3496
	0.247464	0.350486	O14980	XPO1_HUMAN	XPO1	Exportin-1	19.7868	19.3215	18.4548	19.0398	20.3342	19.2406
	0.726275	0.349174	Q16795	NDUA9_HUMAN	NDUFA9	NADH dehydrogenase [ubiquinone] 1 alpha subcomplex subunit 9, mitochondrial	20.0931	19.94	20.2431	20.2812	20.8424	20.2
	0.333738	0.348768	Q99613	EIF3C_HUMAN	EIF3C	Eukaryotic translation initiation factor 3 subunit C	23.3023	24.0586	24.7724	24.3072	24.5421	24.3304
	0.496659	0.348391	Q5F1R6;Q5F1R6-3	DJC21_HUMAN	DNAJC21	DnaJ homolog subfamily C member 21	21.2122	21.9799	22.1941	22.1336	22.0282	22.2695
	0.293017	0.347994	Q92616	GCN1_HUMAN	GCN1	Stalled ribosome sensor GCN1	20.9138	20.3824	20.174	20.3653	21.6913	20.4577
	1.41897	0.347753	O75179;O75179-2;O75179-7	ANR17_HUMAN	ANKRD17	Ankyrin repeat domain-containing protein 17	21.0952	21.4106	21.459	21.672	21.673	21.6629
	1.98924	0.345754	Q01081	U2AF1_HUMAN	U2AF1	Splicing factor U2AF 35 kDa subunit	23.5428	23.3985	23.5339	23.7188	23.9049	23.8887
	0.93757	0.344823	P05386	RLA1_HUMAN	RPLP1	Large ribosomal subunit protein P1	30.4213	30.9605	30.8272	31.1943	31.0402	31.009
	0.203058	0.341632	P04350	TBB4A_HUMAN	TUBB4A	Tubulin beta-4A chain	23.7617	23.0589	22.8523	23.0375	24.7398	22.9204
	1.46297	0.340623	Q05519;Q05519-2	SRS11_HUMAN	SRSF11	Serine/arginine-rich splicing factor 11	22.0679	22.1441	22.3066	22.3656	22.5261	22.6487
	0.381778	0.34016	P60228	EIF3E_HUMAN	EIF3E	Eukaryotic translation initiation factor 3 subunit E	22.9166	23.3868	24.1973	23.8643	23.8561	23.8006
	1.61409	0.33961	O60762	DPM1_HUMAN	DPM1	Dolichol-phosphate mannosyltransferase subunit 1	20.6128	20.8703	20.9224	21.1244	21.1383	21.1616
	0.719671	0.339124	Q3MHD2;Q3MHD2-2	LSM12_HUMAN	LSM12	Protein LSM12	21.3763	21.6452	21.9255	21.9282	22.2656	21.7706
	0.240606	0.337815	O15371;O15371-2;O15371-3	EIF3D_HUMAN	EIF3D	Eukaryotic translation initiation factor 3 subunit D	21.9097	22.7408	23.7817	22.935	23.3273	23.1833
	0.220275	0.335021	P07814	SYEP_HUMAN	EPRS1	Bifunctional glutamate/proline--tRNA ligase	22.2966	21.5135	21.4427	21.5043	23.1357	21.6178
	0.622552	0.333925	P35637;P35637-2	FUS_HUMAN	FUS	RNA-binding protein FUS	24.0893	23.6946	23.9007	23.8293	24.3025	24.5546
	0.293976	0.332336	Q9NVN8	GNL3L_HUMAN	GNL3L	Guanine nucleotide-binding protein-like 3-like protein	19.5962	20.5628	21.1062	20.8276	20.5171	20.9175
	0.429068	0.331059	P63167	DYL1_HUMAN	DYNLL1	Dynein light chain 1, cytoplasmic	19.7912	19.807	19.6734	19.7898	20.7417	19.7332
	0.234511	0.330161	P29966	MARCS_HUMAN	MARCKS	Myristoylated alanine-rich C-kinase substrate	22.2323	21.3974	21.182	21.7789	22.7812	21.2421
	0.495465	0.329051	Q07955	SRSF1_HUMAN	SRSF1	Serine/arginine-rich splicing factor 1	23.0731	22.8209	22.5823	22.7037	23.578	23.1818
	0.554769	0.328915	Q13283	G3BP1_HUMAN	G3BP1	Ras GTPase-activating protein-binding protein 1	22.4477	22.2536	22.1668	22.2008	23.0629	22.5912
	0.584121	0.328391	P50914	RL14_HUMAN	RPL14	Large ribosomal subunit protein eL14	29.4909	30.3159	29.8014	30.1465	30.338	30.1089
	0.0733629	0.327203	Q8NBI5;Q8NBI5-2	S43A3_HUMAN	SLC43A3	Equilibrative nucleobase transporter 1	15.6608	18.7521	18.4911	18.704	19.5889	15.5927
	0.297583	0.323772	Q13347	EIF3I_HUMAN	EIF3I	Eukaryotic translation initiation factor 3 subunit I	22.6324	23.2862	24.104	23.5173	23.8957	23.581
	0.389992	0.323417	P61011;P61011-2	SRP54_HUMAN	SRP54	Signal recognition particle subunit SRP54	23.1878	24.0547	24.335	24.0728	24.2276	24.2473
	0.514413	0.322077	Q08211	DHX9_HUMAN	DHX9	ATP-dependent RNA helicase A	20.9791	21.3469	21.7411	21.3827	21.9506	21.7
	0.0881094	0.321219	P31327;P31327-3	CPSM_HUMAN	CPS1	Carbamoyl-phosphate synthase [ammonia], mitochondrial	19.8747	20.7589	19.3035	19.0525	22.7488	19.0996
	0.190574	0.319646	Q14204	DYHC1_HUMAN	DYNC1H1	Cytoplasmic dynein 1 heavy chain 1	20.0423	19.6189	19.3371	19.5353	21.1903	19.2315
	0.580044	0.317691	Q2NL82	TSR1_HUMAN	TSR1	Pre-rRNA-processing protein TSR1 homolog	23.3905	24.0638	24.1171	24.1845	24.0489	24.291
	0.752528	0.31606	Q9Y676	RT18B_HUMAN	MRPS18B	Small ribosomal subunit protein mS40	19.3681	19.6457	19.9727	19.9256	19.8703	20.1388
	0.261947	0.314028	P06576	ATPB_HUMAN	ATP5F1B	ATP synthase subunit beta, mitochondrial	21.3476	20.8027	20.3911	21.2348	21.7961	20.4527
	0.202051	0.313521	O15042;O15042-2	SR140_HUMAN	U2SURP	U2 snRNP-associated SURP motif-containing protein	15.7034	16.8752	17.5664	17.3249	16.532	17.2287
	0.475775	0.312921	O00411	RPOM_HUMAN	POLRMT	DNA-directed RNA polymerase, mitochondrial	19.127	19.9471	19.9498	20.0206	19.8349	20.1072
	0.758972	0.311512	P82930	RT34_HUMAN	MRPS34	Small ribosomal subunit protein mS34	19.9262	20.1209	19.8436	20.4306	19.9357	20.459
	1.06405	0.30972	P05549;P05549-5;P05549-6	AP2A_HUMAN	TFAP2A	Transcription factor AP-2-alpha	20.2975	20.707	20.6984	20.9107	20.8369	20.8845
	0.580435	0.304626	Q9UNQ2	DIM1_HUMAN	DIMT1	Probable dimethyladenosine transferase	21.801	22.4712	22.5199	22.5178	22.6227	22.5655
	0.513497	0.302373	Q9ULX3	NOB1_HUMAN	NOB1	RNA-binding protein NOB1	21.2097	21.7214	22.0651	21.9976	21.8343	22.0713
	0.310283	0.302304	Q8N5K1	CISD2_HUMAN	CISD2	CDGSH iron-sulfur domain-containing protein 2	20.3884	19.912	19.0744	19.9128	20.0996	20.2693
	1.02813	0.300603	Q9UKV8	AGO2_HUMAN	AGO2	Protein argonaute-2	23.6638	23.995	23.8064	24.0539	24.3161	23.9971
	0.391622	0.300144	P10620	MGST1_HUMAN	MGST1	Microsomal glutathione S-transferase 1	20.0195	20.2963	20.0114	20.1218	21.0277	20.0781
	0.964217	0.299944	Q53GQ0	DHB12_HUMAN	HSD17B12	Very-long-chain 3-oxoacyl-CoA reductase	20.3527	20.589	20.1679	20.5193	20.7912	20.6989
	0.255072	0.296785	K7EPI4	K7EPI4_HUMAN	GFAP	Isoform of P14136, Glial fibrillary acidic protein (Fragment)	21.2935	22.5544	22.7315	22.6528	22.4878	22.3291
	0.317971	0.296106	Q32MZ4;Q32MZ4-2;Q32MZ4-3	LRRF1_HUMAN	LRRFIP1	Leucine-rich repeat flightless-interacting protein 1	20.734	20.1006	20.0291	20.4642	21.1684	20.1194
	0.349932	0.295668	P78527;P78527-2	PRKDC_HUMAN	PRKDC	DNA-dependent protein kinase catalytic subunit	19.9652	19.607	19.569	19.6852	20.664	19.679
	0.144472	0.295225	Q9NVP2	ASF1B_HUMAN	ASF1B	Histone chaperone ASF1B	15.7814	17.7136	17.9829	17.1347	18.0707	17.1582
	0.456417	0.291157	Q96GQ7	DDX27_HUMAN	DDX27	Probable ATP-dependent RNA helicase DDX27	19.0409	19.8547	19.8664	19.9427	19.853	19.8397
	0.200612	0.290441	P35250	RFC2_HUMAN	RFC2	Replication factor C subunit 2	19.1948	20.6748	20.9611	20.5074	20.7761	20.4185
	0.598681	0.290045	O75964	ATP5L_HUMAN	ATP5MG	ATP synthase subunit g, mitochondrial	18.3138	18.4518	18.3284	18.4224	19.0787	18.463
	0.393423	0.289174	Q07666;Q07666-2	KHDR1_HUMAN	KHDRBS1	KH domain-containing, RNA-binding, signal transduction-associated protein 1	21.9054	21.3966	21.4516	21.4104	22.3289	21.8818
	0.320334	0.287411	Q16630;Q16630-2;Q16630-3	CPSF6_HUMAN	CPSF6	Cleavage and polyadenylation specificity factor subunit 6	20.1344	19.5819	19.3561	19.505	20.4935	19.9361
	0.465945	0.285875	Q4G0J3;Q4G0J3-3	LARP7_HUMAN	LARP7	La-related protein 7	19.1563	19.9223	19.8696	19.9411	19.7643	20.1004
	0.601518	0.285016	Q9BXS6;Q9BXS6-2;Q9BXS6-3;Q9BXS6-4;Q9BXS6-5;Q9BXS6-6	NUSAP_HUMAN	NUSAP1	Nucleolar and spindle-associated protein 1	21.0303	21.6907	21.5761	21.6234	21.7021	21.8266
	0.268546	0.281218	P17844	DDX5_HUMAN	DDX5	Probable ATP-dependent RNA helicase DDX5	23.8347	24.1723	25.114	24.3691	24.9581	24.6375
	0.711217	0.279826	P32969	RL9_HUMAN	RPL9P9	Large ribosomal subunit protein uL6	29.5734	30.1106	29.669	30.021	30.2012	29.9702
	0.203079	0.277299	Q01831	XPC_HUMAN	XPC	DNA repair protein complementing XP-C cells	17.7865	19.3723	18.7496	18.4182	19.0589	19.2633
	0.271441	0.276843	Q9Y520-4	PRC2C_HUMAN	PRRC2C	Isoform of Q9Y520, Isoform 4 of Protein PRRC2C	22.979	23.6976	24.3906	23.9137	24.0179	23.9661
	1.46229	0.276613	P62995;P62995-3	TRA2B_HUMAN	TRA2B	Transformer-2 protein homolog beta	22.0883	22.1081	22.241	22.2999	22.5542	22.4132
	0.291127	0.276077	Q9UIG0;Q9UIG0-2	BAZ1B_HUMAN	BAZ1B	Tyrosine-protein kinase BAZ1B	19.5375	20.4467	20.8069	20.5449	20.4212	20.6532
	0.218018	0.274903	Q12905	ILF2_HUMAN	ILF2	Interleukin enhancer-binding factor 2	20.7174	20.1978	20.8104	20.353	21.7532	20.444
	0.139444	0.274678	Q9P2J5	SYLC_HUMAN	LARS1	Leucine--tRNA ligase, cytoplasmic	19.7507	18.7777	19.0255	18.8524	20.7929	18.7327
	0.0357768	0.273936	Q9UHA3	RLP24_HUMAN	RSL24D1	Probable ribosome biogenesis protein RLP24	16.367	14.1856	21.0858	20.6642	15.5172	16.2789
	0.425208	0.273353	Q01130	SRSF2_HUMAN	SRSF2	Serine/arginine-rich splicing factor 2	24.713	24.194	23.8995	24.2795	24.7416	24.6054
	0.344615	0.273027	P30419	NMT1_HUMAN	NMT1	Glycylpeptide N-tetradecanoyltransferase 1	18.8356	19.7119	19.6416	19.4261	19.9952	19.5869
	0.463266	0.273013	P08670	VIME_HUMAN	VIM	Vimentin	21.8595	21.4758	21.3334	22.2045	21.7641	21.5192
	0.547233	0.271351	P20290	BTF3_HUMAN	BTF3	Transcription factor BTF3	23.5326	23.7523	23.3426	23.7126	24.172	23.557
	0.256656	0.271077	O75165	DJC13_HUMAN	DNAJC13	DnaJ homolog subfamily C member 13	19.4102	20.3918	20.8059	20.3936	20.6164	20.4112
	0.203079	0.268567	P55884;P55884-2	EIF3B_HUMAN	EIF3B	Eukaryotic translation initiation factor 3 subunit B	22.331	23.2052	24.0869	23.4172	23.5935	23.4181
	0.304684	0.268114	Q9NPE3	NOP10_HUMAN	NOP10	H/ACA ribonucleoprotein complex subunit 3	17.6188	17.7426	18.4499	18.283	18.5899	17.7428
	0.527351	0.265018	O95232	LC7L3_HUMAN	LUC7L3	Luc7-like protein 3	20.5595	20.1522	19.8965	20.2687	20.4951	20.6394
	0.16713	0.264808	O15031	PLXB2_HUMAN	PLXNB2	Plexin-B2	19.0006	18.2175	17.0026	18.5532	18.3829	18.0791
	0.660004	0.263822	P62081	RS7_HUMAN	RPS7	Small ribosomal subunit protein eS7	28.9423	29.4263	29.4872	29.5047	29.6589	29.4836
	0.589712	0.263041	Q13243;Q13243-3	SRSF5_HUMAN	SRSF5	Serine/arginine-rich splicing factor 5	22.5992	22.8395	23.216	23.0835	23.0413	23.3191
	0.28758	0.261338	Q9Y3I0	RTCB_HUMAN	RTCB	RNA-splicing ligase RtcB homolog	21.3949	21.8206	22.4636	21.9657	22.5451	21.9522
	0.532966	0.261013	Q9Y3D9	RT23_HUMAN	MRPS23	Small ribosomal subunit protein mS23	19.3816	19.9015	19.9628	19.8329	20.2177	19.9783
	0.0743846	0.260645	Q15758	AAAT_HUMAN	SLC1A5	Neutral amino acid transporter B(0)	16.9018	17.9541	18.2354	17.6739	20.0964	16.1029
	0.262398	0.256095	P39656;P39656-2;P39656-3	OST48_HUMAN	DDOST	Dolichyl-diphosphooligosaccharide--protein glycosyltransferase 48 kDa subunit	18.0701	17.261	17.3531	17.7891	18.3394	17.324
	0.612016	0.254441	Q96EU6;Q96EU6-2	RRP36_HUMAN	RRP36	Ribosomal RNA processing protein 36 homolog	20.4123	20.6827	20.975	21.0631	20.764	21.0062
	1.77443	0.252386	P62318;P62318-2	SMD3_HUMAN	SNRPD3	Small nuclear ribonucleoprotein Sm D3	23.489	23.4692	23.3913	23.7111	23.6002	23.7953
	0.223791	0.248315	O60832	DKC1_HUMAN	DKC1	H/ACA ribonucleoprotein complex subunit DKC1	19.7117	21.0509	20.9282	20.8778	20.669	20.889
	0.260541	0.248168	Q9Y3L5	RAP2C_HUMAN	RAP2C	Ras-related protein Rap-2c	20.3256	19.6311	19.2049	20.0653	20.2446	19.5962
	1.04815	0.247252	Q9NZB2;Q9NZB2-6	F120A_HUMAN	FAM120A	Constitutive coactivator of PPAR-gamma-like protein 1	21.1619	21.1813	21.1859	21.2031	21.5192	21.5485
	0.295065	0.247213	Q9BQ39	DDX50_HUMAN	DDX50	ATP-dependent RNA helicase DDX50	18.594	19.4984	19.6632	19.4694	19.3964	19.6314
	0.953434	0.246682	Q9Y421	FA32A_HUMAN	FAM32A	Protein FAM32A	21.6511	21.8261	21.4863	21.7824	21.8934	22.0278
	0.348493	0.246379	P11940	PABP1_HUMAN	PABPC1	Polyadenylate-binding protein 1	23.9895	24.7068	24.9072	24.6928	24.9646	24.6851
	0.577624	0.245801	Q96JP5;Q96JP5-2	ZFP91_HUMAN	ZFP91	E3 ubiquitin-protein ligase ZFP91	17.3909	17.6926	17.3592	17.4467	17.7437	17.9897
	0.344289	0.243873	P49711	CTCF_HUMAN	CTCF	Transcriptional repressor CTCF	19.0277	19.8684	19.826	19.8246	19.6304	19.9987
	1.25233	0.242432	P22087	FBRL_HUMAN	FBL	rRNA 2'-O-methyltransferase fibrillarin	20.7604	20.7219	20.9914	21.1028	20.9985	21.0997
	1.12055	0.242324	Q9P206-2	K1522_HUMAN	KIAA1522	Isoform of Q9P206, Isoform 2 of Uncharacterized protein KIAA1522	18.5232	18.7721	18.4772	18.7472	18.8937	18.8586
	0.506469	0.241554	P83881	RL36A_HUMAN	RPL36A	Large ribosomal subunit protein eL42	28.3215	29.0139	28.6709	29.028	28.8307	28.8722
	0.803851	0.240483	Q9H9L3	I20L2_HUMAN	ISG20L2	Interferon-stimulated 20 kDa exonuclease-like 2	20.725	21.1687	20.8013	21.1043	21.1713	21.1409
	0.444107	0.239999	P84103;P84103-2	SRSF3_HUMAN	SRSF3	Serine/arginine-rich splicing factor 3	25.2136	25.0563	24.8856	24.9044	25.3364	25.6346
	0.199277	0.23994	Q9NY93;Q9NY93-2	DDX56_HUMAN	DDX56	Probable ATP-dependent RNA helicase DDX56	19.1537	19.6167	20.6698	20.2822	19.8995	19.9783
	0.522594	0.238885	Q9UHI6	DDX20_HUMAN	DDX20	Probable ATP-dependent RNA helicase DDX20	19.1214	19.3218	19.4467	19.3118	19.8854	19.4094
	0.606007	0.238041	Q8TDD1-2	DDX54_HUMAN	DDX54	Isoform of Q8TDD1, Isoform 2 of ATP-dependent RNA helicase DDX54	20.8068	21.2802	21.0318	21.1495	21.1849	21.4986
	0.305666	0.236535	P09012	SNRPA_HUMAN	SNRPA	U1 small nuclear ribonucleoprotein A	19.1625	18.8256	18.3104	18.765	19.3889	18.8543
	0.334584	0.236194	Q92974;Q92974-2;Q92974-3	ARHG2_HUMAN	ARHGEF2	Rho guanine nucleotide exchange factor 2	19.0199	18.9732	18.7128	18.7239	19.6588	19.0318
	0.331276	0.235873	Q9BUJ2;Q9BUJ2-2;Q9BUJ2-4	HNRL1_HUMAN	HNRNPUL1	Heterogeneous nuclear ribonucleoprotein U-like protein 1	20.9049	21.5058	21.8282	21.4764	21.8622	21.6079
	0.157428	0.235344	Q14247	SRC8_HUMAN	CTTN	Src substrate cortactin	21.3619	20.1096	20.0524	20.5416	21.4466	20.2418
	1.11947	0.234898	P62917	RL8_HUMAN	RPL8	Large ribosomal subunit protein uL2	29.8495	30.1072	30.0986	30.3347	30.1596	30.2657
	0.393799	0.232653	E9PAV3;E9PAV3-2;Q13765	NACAM_HUMAN;NACA_HUMAN	NACA	Nascent polypeptide-associated complex subunit alpha, muscle-specific form	24.294	24.4952	23.984	24.327	24.8889	24.2552
	0.321901	0.228347	P0C0S5;Q71UI9	H2AV_HUMAN;H2AZ_HUMAN	H2AZ1;H2AZ2	Histone H2A.Z	24.4813	23.8349	23.535	24.3175	24.0335	24.1852
	1.10392	0.227397	Q8IXM3	RM41_HUMAN	MRPL41	Large ribosomal subunit protein mL41	19.416	19.5407	19.6229	19.664	19.9049	19.693
	0.909093	0.227264	P14678	RSMB_HUMAN	SNRPB	Small nuclear ribonucleoprotein-associated proteins B and B'	21.5086	21.5306	21.274	21.6532	21.5276	21.8141
	0.418069	0.226086	Q9UN86-2;Q9UN86	G3BP2_HUMAN	G3BP2	Ras GTPase-activating protein-binding protein 2	22.2666	22.536	22.4508	22.3545	23.0668	22.5105
	0.27214	0.225278	Q9Y324	FCF1_HUMAN	FCF1	rRNA-processing protein FCF1 homolog	18.6483	19.5813	19.525	19.6812	19.2158	19.5334
	0.374714	0.224939	P06748	NPM_HUMAN	NPM1	Nucleophosmin	25.5196	26.1482	25.3427	25.8776	26.0068	25.8009
	0.318791	0.224283	P19338	NUCL_HUMAN	NCL	Nucleolin	26.9812	27.5795	27.9479	27.6511	27.8481	27.6823
	0.598684	0.219843	Q3KQU3;Q3KQU3-4	MA7D1_HUMAN	MAP7D1	MAP7 domain-containing protein 1	19.4934	19.7428	20.0424	19.8994	19.9936	20.045
	0.206517	0.219702	P61158	ARP3_HUMAN	ACTR3	Actin-related protein 3	19.7878	19.1004	19.2945	19.2787	20.3272	19.236
	0.135218	0.217097	Q7L2H7	EIF3M_HUMAN	EIF3M	Eukaryotic translation initiation factor 3 subunit M	21.603	22.7013	23.64	22.9936	22.8052	22.7968
	0.200647	0.216906	Q96SB4;Q96SB4-3;Q96SB4-4	SRPK1_HUMAN	SRPK1	SRSF protein kinase 1	19.4354	20.4785	20.6642	20.0868	20.5119	20.6301
	0.51329	0.21688	Q8IY81	SPB1_HUMAN	FTSJ3	pre-rRNA 2'-O-ribose RNA methyltransferase FTSJ3	20.9573	21.5629	21.4229	21.5706	21.4763	21.5469
	0.0945233	0.216752	Q15019;Q15019-2;Q15019-3	SEPT2_HUMAN	SEPTIN2	Septin-2	19.9176	19.6088	19.3196	19.1978	21.4229	18.8755
	0.227815	0.215323	Q9Y5A9	YTHD2_HUMAN	YTHDF2	YTH domain-containing family protein 2	19.7548	20.2995	20.7573	20.2037	20.9417	20.3122
	0.362849	0.213765	P46782	RS5_HUMAN	RPS5	Small ribosomal subunit protein uS7	28.3172	28.7767	28.7906	28.6381	28.6653	29.2225
	0.3894	0.212234	Q9NQZ2	SAS10_HUMAN	UTP3	Something about silencing protein 10	19.2781	19.1176	19.7544	19.8143	19.3729	19.5995
	0.663587	0.211863	O95714	HERC2_HUMAN	HERC2	E3 ubiquitin-protein ligase HERC2	19.0771	19.3974	18.9619	19.2518	19.3506	19.4696
	0.169904	0.210346	P47897;P47897-2	SYQ_HUMAN	QARS1	Glutamine--tRNA ligase	20.129	19.4045	19.6289	19.4856	20.7622	19.5457
	0.370535	0.208174	Q86UE4	LYRIC_HUMAN	MTDH	Protein LYRIC	21.8713	22.1213	22.5899	22.2336	22.3796	22.5938
	0.15475	0.206214	Q09666	AHNK_HUMAN	AHNAK	Neuroblast differentiation-associated protein AHNAK	23.9778	23.1904	22.7925	23.3285	24.2185	23.0323
	0.412919	0.204927	Q96DV4	RM38_HUMAN	MRPL38	Large ribosomal subunit protein mL38	19.6218	19.3344	19.0397	19.556	19.7477	19.3069
	0.39695	0.203664	Q14527	HLTF_HUMAN	HLTF	Helicase-like transcription factor	21.3866	22.0067	21.9374	22.1642	21.8691	21.9084
	0.493735	0.201266	P62857	RS28_HUMAN	RPS28	Small ribosomal subunit protein eS28	28.4856	29.0722	28.938	29.0372	29.0135	29.0489
	0.242699	0.200051	O15381;O15381-5	NVL_HUMAN	NVL	Nuclear valosin-containing protein-like	17.2651	17.5917	17.6603	18.3057	17.4604	17.3512
	0.352633	0.199252	Q9NWB6	ARGL1_HUMAN	ARGLU1	Arginine and glutamate-rich protein 1	22.1413	21.6532	21.3535	21.817	21.9755	21.9533
	0.079929	0.198809	P14868	SYDC_HUMAN	DARS1	Aspartate--tRNA ligase, cytoplasmic	19.7032	19.586	19.9494	19.4691	21.6344	18.7316
	0.368329	0.198217	P62070;P62070-4	RRAS2_HUMAN	RRAS2	Ras-related protein R-Ras2	20.7975	20.6772	20.1601	20.9609	20.6759	20.5928
	0.206728	0.196562	Q9Y224	RTRAF_HUMAN	RTRAF	RNA transcription, translation and transport factor protein	20.5165	21.0694	21.6519	21.1419	21.6069	21.0786
	0.442329	0.19649	Q9UHB6-4	LIMA1_HUMAN	LIMA1	Isoform of Q9UHB6, Isoform 4 of LIM domain and actin-binding protein 1	23.4886	22.9918	22.9305	23.4499	23.3481	23.2024
	0.351499	0.193825	P40938;P40938-2	RFC3_HUMAN	RFC3	Replication factor C subunit 3	19.5975	20.2448	20.285	20.1756	20.3426	20.1906
	0.76199	0.193319	P26368;P26368-2	U2AF2_HUMAN	U2AF2	Splicing factor U2AF 65 kDa subunit	23.5755	23.6027	23.7364	23.6422	23.8452	24.0072
	0.181583	0.192257	Q99575	POP1_HUMAN	POP1	Ribonucleases P/MRP protein subunit POP1	20.79	21.8229	21.9427	21.8375	21.3758	21.9191
	0.574913	0.191014	P62753	RS6_HUMAN	RPS6	Small ribosomal subunit protein eS6	29.6022	30.0685	29.8453	30.0827	29.9077	30.0986
	0.301101	0.190547	Q9P0L0;Q9P0L0-2	VAPA_HUMAN	VAPA	Vesicle-associated membrane protein-associated protein A	20.6269	20.3772	20.5835	20.5402	21.2051	20.414
	0.311232	0.189937	P46781	RS9_HUMAN	RPS9	Small ribosomal subunit protein uS4	28.585	29.2066	29.1789	29.2536	28.9006	29.386
	0.234417	0.189198	Q9BUQ8	DDX23_HUMAN	DDX23	Probable ATP-dependent RNA helicase DDX23	18.8561	19.2716	19.3634	19.0878	19.9049	19.066
	0.328646	0.188952	Q9P031	TAP26_HUMAN	CCDC59	Thyroid transcription factor 1-associated protein 26	20.6555	21.1654	21.3918	21.4445	21.1589	21.176
	0.235812	0.188772	Q08170	SRSF4_HUMAN	SRSF4	Serine/arginine-rich splicing factor 4	22.1291	21.3934	21.1706	21.6927	21.9905	21.5763
	0.132642	0.188623	Q96QD8	S38A2_HUMAN	SLC38A2	Sodium-coupled neutral amino acid symporter 2	19.9353	19.3011	19.3845	19.157	20.6916	19.3382
	0.434347	0.187365	P62304	RUXE_HUMAN	SNRPE	Small nuclear ribonucleoprotein E	21.098	21.0655	20.7673	21.0312	20.9944	21.4672
	0.523012	0.187168	Q9Y295	DRG1_HUMAN	DRG1	Developmentally-regulated GTP-binding protein 1	21.0149	21.3486	21.4895	21.3312	21.534	21.5493
	0.620064	0.185896	Q8IYB3;Q8IYB3-2	SRRM1_HUMAN	SRRM1	Serine/arginine repetitive matrix protein 1	19.9032	19.4439	19.6695	19.8099	19.8799	19.8844
	0.232195	0.181053	Q96JB5;Q96JB5-4	CK5P3_HUMAN	CDK5RAP3	CDK5 regulatory subunit-associated protein 3	20.0889	20.723	21.0655	20.9335	20.8963	20.5907
	0.299265	0.180125	Q9UNZ5	L10K_HUMAN	C19orf53	Leydig cell tumor 10 kDa protein homolog	20.5907	21.0027	21.4003	21.2901	21.1991	21.0449
	0.117795	0.1795	Q9UHD8	SEPT9_HUMAN	SEPTIN9	Septin-9	19.6486	19.0459	18.8427	19.06	20.3328	18.683
	0.401638	0.179174	Q12797	ASPH_HUMAN	ASPH	Aspartyl/asparaginyl beta-hydroxylase	20.5056	20.6208	21.0216	20.7042	21.0703	20.9112
	0.363914	0.178249	P67809	YBOX1_HUMAN	YBX1	Y-box-binding protein 1	24.9197	25.3526	25.5491	25.2892	25.577	25.49
	0.090124	0.177235	O00303	EIF3F_HUMAN	EIF3F	Eukaryotic translation initiation factor 3 subunit F	21.7738	23.2239	24.0648	23.5669	22.8561	23.1712
	0.483578	0.176931	O15226;O15226-2	NKRF_HUMAN	NKRF	NF-kappa-B-repressing factor	20.4708	20.9592	20.9072	20.9715	21.0099	20.8866
	0.191106	0.175701	O00571;O00571-2	DDX3X_HUMAN	DDX3X	ATP-dependent RNA helicase DDX3X	22.122	21.7542	22.8912	22.2237	22.5906	22.4802
	0.447262	0.175502	Q9BVP2;Q9BVP2-2	GNL3_HUMAN	GNL3	Guanine nucleotide-binding protein-like 3	22.526	23.0951	22.9253	23.0302	23.0132	23.0296
	0.140823	0.175329	P07910-2;P07910	HNRPC_HUMAN	HNRNPC	Heterogeneous nuclear ribonucleoproteins C1/C2	23.9105	24.9457	25.4513	25.042	24.7786	25.0129
	0.631032	0.175109	Q9HCE1	MOV10_HUMAN	MOV10	Helicase MOV-10	21.1423	21.5041	21.5261	21.547	21.5622	21.5886
	0.227279	0.174427	Q9GZS3	SKI8_HUMAN	SKIC8	Superkiller complex protein 8	23.6547	24.5589	24.5238	24.4824	24.3158	24.4626
	0.377	0.174184	Q9NSI2;Q9NSI2-2	SLX9_HUMAN	SLX9	Ribosome biogenesis protein SLX9 homolog	21.3076	21.0625	21.3016	21.3779	21.1033	21.713
	0.206132	0.172853	P50148	GNAQ_HUMAN	GNAQ	Guanine nucleotide-binding protein G(q) subunit alpha	22.4144	21.9488	21.3473	22.1806	22.1685	21.8798
	0.483432	0.171906	P62244	RS15A_HUMAN	RPS15A	Small ribosomal subunit protein uS8	27.7718	28.2129	28.1082	28.1826	28.0778	28.3483
	0.261017	0.170563	Q5VTL8	PR38B_HUMAN	PRPF38B	Pre-mRNA-splicing factor 38B	20.3822	19.7608	20.1148	20.3131	19.9059	20.5506
	0.507165	0.169392	Q9H6H4	REEP4_HUMAN	REEP4	Receptor expression-enhancing protein 4	20.4087	20.1776	20.1841	20.296	20.6759	20.3066
	1.09005	0.166051	Q8NC51	SERB1_HUMAN	SERBP1	SERPINE1 mRNA-binding protein 1	28.8213	29.0061	28.9605	29.0315	29.0719	29.1827
	0.16001	0.165784	P62701	RS4X_HUMAN	RPS4X	Small ribosomal subunit protein eS4, X isoform	28.4021	29.3858	29.6413	29.3802	29.1258	29.4205
	0.783176	0.165773	Q8IUE6	H2A2B_HUMAN	H2AC21	Histone H2A type 2-B	24.3436	24.22	24.0444	24.2826	24.433	24.3897
	0.240338	0.165208	P0CW18	PRS56_HUMAN	PRSS56	Serine protease 56	21.6895	21.0369	20.9641	21.1266	21.6102	21.4493
	0.147594	0.165155	P25705;P25705-2	ATPA_HUMAN	ATP5F1A	ATP synthase subunit alpha, mitochondrial	20.7242	20.0142	20.2531	20.4021	21.1614	19.9236
	0.315172	0.164101	P25398	RS12_HUMAN	RPS12	Small ribosomal subunit protein eS12	28.9011	29.5229	29.5181	29.5278	29.3735	29.5331
	0.359345	0.163706	Q9Y2W1	TR150_HUMAN	THRAP3	Thyroid hormone receptor-associated protein 3	18.8671	18.3971	18.9316	18.78	19.0675	18.8395
	1.31785	0.161297	Q9H4L4	SENP3_HUMAN	SENP3	Sentrin-specific protease 3	18.545	18.6556	18.7111	18.7575	18.857	18.7811
	0.427179	0.160842	P08621	RU17_HUMAN	SNRNP70	U1 small nuclear ribonucleoprotein 70 kDa	22.5145	22.1838	22.3638	22.2895	22.7377	22.5174
	0.213557	0.160334	P62834	RAP1A_HUMAN	RAP1A	Ras-related protein Rap-1A	20.0982	19.7049	19.9417	20.2315	20.4414	19.5529
	0.0894916	0.157772	O15144	ARPC2_HUMAN	ARPC2	Actin-related protein 2/3 complex subunit 2	20.2468	19.576	19.2614	19.2747	20.9638	19.3189
	0.206165	0.157086	A0FGR8-2	ESYT2_HUMAN	ESYT2	Isoform of A0FGR8, Isoform 2 of Extended synaptotagmin-2	18.9782	19.4439	19.2435	19.0728	19.9	19.1641
	0.351143	0.156516	Q6PKG0	LARP1_HUMAN	LARP1	La-related protein 1	25.8681	26.3255	26.4067	26.4035	26.2033	26.4631
	0.0862303	0.153506	Q04637;Q04637-3;Q04637-4;Q04637-5;Q04637-9;Q04637-8	IF4G1_HUMAN	EIF4G1	Eukaryotic translation initiation factor 4 gamma 1	21.1579	20.4421	20.1296	20.069	21.8293	20.2918
	0.558728	0.152828	Q00325-2;Q00325	S25A3_HUMAN	SLC25A3	Solute carrier family 25 member 3	22.2585	21.8807	21.9507	22.1274	22.1726	22.2485
	0.215079	0.151045	P43121	MUC18_HUMAN	MCAM	Cell surface glycoprotein MUC18	21.2817	20.7194	20.6412	21.1011	21.3098	20.6845
	0.255864	0.149835	P35527	K1C9_HUMAN	KRT9	Keratin, type I cytoskeletal 9	25.7504	26.0056	25.7905	25.8577	25.7102	26.428
	0.347386	0.148339	P46777	RL5_HUMAN	RPL5	Large ribosomal subunit protein uL18	29.5943	29.7824	29.8968	29.9569	29.6185	30.1432
	0.288635	0.148321	Q9Y383	LC7L2_HUMAN	LUC7L2	Putative RNA-binding protein Luc7-like 2	23.2522	22.8014	22.5902	22.9276	22.9958	23.1654
	0.827833	0.148092	Q9Y3C1	NOP16_HUMAN	NOP16	Nucleolar protein 16	22.4913	22.7747	22.5949	22.7614	22.7669	22.7768
	0.358883	0.147959	Q969S3	ZN622_HUMAN	ZNF622	Cytoplasmic 60S subunit biogenesis factor ZNF622	24.2966	24.8236	24.7202	24.8462	24.7909	24.6472
	0.61182	0.14699	P12235	ADT1_HUMAN	SLC25A4	ADP/ATP translocase 1	19.5029	19.5271	19.6616	19.8579	19.7439	19.5308
	0.614373	0.1465	Q15149-2	PLEC_HUMAN	PLEC	Isoform of Q15149, Isoform 2 of Plectin	19.4303	19.2113	19.3864	19.3694	19.4481	19.6501
	0.224659	0.145524	P46776	RL27A_HUMAN	RPL27A	Large ribosomal subunit protein uL15	30.0376	30.5633	30.3819	30.8594	30.1851	30.3749
	0.087993	0.144882	Q9UBN4;Q9UBN4-2;Q9UBN4-3;Q9UBN4-4;Q9UBN4-5;Q9UBN4-6;Q9UL62	TRPC4_HUMAN;TRPC5_HUMAN	TRPC4;TRPC5	Short transient receptor potential channel 4	21.9291	23.7076	23.5516	23.4455	22.9687	23.2088
	0.268705	0.144821	Q9BQ75;Q9BQ75-2	CMS1_HUMAN	CMSS1	Protein CMSS1	20.4301	20.9489	21.1246	20.8694	21.0291	21.0396
	0.188989	0.143439	O76094	SRP72_HUMAN	SRP72	Signal recognition particle subunit SRP72	23.5775	24.2632	24.5424	24.3353	24.1822	24.2961
	0.903057	0.140523	Q96FS4	SIPA1_HUMAN	SIPA1	Signal-induced proliferation-associated protein 1	24.3286	24.2487	24.0939	24.3607	24.4057	24.3264
	0.13431	0.139678	Q13393;Q13393-2;Q13393-4	PLD1_HUMAN	PLD1	Phospholipase D1	18.1835	19.4596	19.0598	19.0144	19.1729	18.9347
	0.181277	0.138375	Q9UHB9	SRP68_HUMAN	SRP68	Signal recognition particle subunit SRP68	22.9878	23.776	23.9184	23.6572	23.6932	23.747
	0.0265307	0.137801	Q6IQ21	ZN770_HUMAN	ZNF770	Zinc finger protein 770	15.088	18.9898	18.7672	18.7708	15.3671	19.1206
	0.103405	0.137316	Q9BPX5	ARP5L_HUMAN	ARPC5L	Actin-related protein 2/3 complex subunit 5-like protein	20.0619	19.0627	18.8084	19.5348	19.8954	18.9148
	0.702485	0.136775	Q14498;Q14498-2	RBM39_HUMAN	RBM39	RNA-binding protein 39	23.7734	23.6407	23.5732	23.8565	23.6665	23.8746
	0.226098	0.134659	P40937;P40937-2	RFC5_HUMAN	RFC5	Replication factor C subunit 5	19.7595	20.3218	20.4818	20.4743	20.2856	20.2073
	0.0580984	0.133232	Q9NRW3	ABC3C_HUMAN	APOBEC3C	DNA dC->dU-editing enzyme APOBEC-3C	16.3629	18.108	18.7349	18.3579	18.0686	17.179
	0.369861	0.132106	Q6WCQ1	MPRIP_HUMAN	MPRIP	Myosin phosphatase Rho-interacting protein	21.6391	21.48	21.8981	21.9753	21.7439	21.6943
	0.658551	0.131788	Q8IWZ3;Q8IWZ3-4;Q8IWZ3-6	ANKH1_HUMAN	ANKHD1	Ankyrin repeat and KH domain-containing protein 1	19.686	19.6766	19.9408	19.9531	19.8772	19.8684
	0.110989	0.131001	P52701;P52701-3;P52701-4;P52701-2	MSH6_HUMAN	MSH6	DNA mismatch repair protein Msh6	18.0051	17.6363	18.0844	17.7306	18.8415	17.5468
	0.294766	0.130986	Q07065	CKAP4_HUMAN	CKAP4	Cytoskeleton-associated protein 4	21.0208	20.7881	20.7406	20.9099	21.2828	20.7498
	0.338388	0.13012	P35268	RL22_HUMAN	RPL22	Large ribosomal subunit protein eL22	29.8651	30.4004	30.2413	30.3035	30.3091	30.2845
	0.157925	0.129079	P62888	RL30_HUMAN	RPL30	Large ribosomal subunit protein eL30	29.1949	30.1287	30.0272	30.0429	29.768	29.9271
	0.292217	0.128723	Q9NWU5	RM22_HUMAN	MRPL22	Large ribosomal subunit protein uL22m	21.2589	21.79	21.6576	21.5866	21.8515	21.6546
	0.105576	0.126872	P53999	TCP4_HUMAN	SUB1	Activated RNA polymerase II transcriptional coactivator p15	25.3894	24.8046	23.9418	24.6798	24.8011	25.0355
	0.369958	0.1251	Q9NUL3	STAU2_HUMAN	STAU2	Double-stranded RNA-binding protein Staufen homolog 2	22.3732	22.8085	22.6588	22.834	22.6251	22.7567
	0.272201	0.124464	Q8ND56;Q8ND56-2;Q8ND56-3	LS14A_HUMAN	LSM14A	Protein LSM14 homolog A	22.6388	22.768	23.0933	22.7463	22.9525	23.1748
	0.46853	0.123894	P62854	RS26_HUMAN	RPS26	Small ribosomal subunit protein eS26	29.1898	29.5343	29.4006	29.407	29.5978	29.4915
	0.141184	0.121104	Q92643;Q92643-2	GPI8_HUMAN	PIGK	GPI-anchor transamidase	18.5401	17.9043	18.2466	17.8816	18.7761	18.3965
	0.951712	0.120146	Q16629;Q16629-2;Q16629-3;Q16629-4	SRSF7_HUMAN	SRSF7	Serine/arginine-rich splicing factor 7	24.4166	24.3971	24.4039	24.4532	24.4824	24.6424
	0.0600863	0.118968	Q16698;Q16698-2	DECR_HUMAN	DECR1	2,4-dienoyl-CoA reductase [(3E)-enoyl-CoA-producing], mitochondrial	21.2038	22.6082	23.5274	22.5308	22.7889	22.3765
	0.208123	0.11839	Q7L014	DDX46_HUMAN	DDX46	Probable ATP-dependent RNA helicase DDX46	21.966	21.9385	21.4056	21.6526	22.0686	21.9441
	0.482711	0.117683	Q9NP64;Q9NP64-2;Q9NP64-3	ZCC17_HUMAN	ZCCHC17	Zinc finger CCHC domain-containing protein 17	21.8514	22.0616	22.1501	22.2461	22.124	22.0462
	0.0200265	0.117615	Q9Y3B9	RRP15_HUMAN	RRP15	RRP15-like protein	15.5604	20.119	20.0969	20.0213	16.2392	19.8687
	0.177198	0.117287	P13639	EF2_HUMAN	EEF2	Elongation factor 2	27.7033	28.3907	28.4382	28.3564	28.1319	28.3958
	0.147825	0.117074	P61513	RL37A_HUMAN	RPL37A	Large ribosomal subunit protein eL43	28.4059	29.0995	28.8751	29.0508	28.4932	29.1877
	0.279596	0.116022	Q9H5Q4	TFB2M_HUMAN	TFB2M	Dimethyladenosine transferase 2, mitochondrial	20.2958	20.2587	20.3031	20.342	20.1484	20.7153
	0.162936	0.115419	Q8WY22	BRI3B_HUMAN	BRI3BP	BRI3-binding protein	19.4701	19.3347	19.2413	18.9632	19.8216	19.6075
	0.360199	0.114145	O60264	SMCA5_HUMAN	SMARCA5	SWI/SNF-related matrix-associated actin-dependent regulator of chromatin subfamily A member 5	20.225	20.4707	20.6154	20.6047	20.4183	20.6305
	0.141123	0.112257	P35249	RFC4_HUMAN	RFC4	Replication factor C subunit 4	19.8293	20.3187	20.7669	20.309	20.6494	20.2933
	0.296443	0.110587	Q8WWI1-3	LMO7_HUMAN	LMO7	Isoform of Q8WWI1, Isoform 3 of LIM domain only protein 7	21.805	21.3956	21.8377	21.8798	21.7892	21.7012
	0.119444	0.109233	P27635	RL10_HUMAN	RPL10	Large ribosomal subunit protein uL16	28.9979	29.943	29.8056	29.6803	29.4278	29.966
	0.339612	0.108599	Q8WXA9;Q8WXA9-2	SREK1_HUMAN	SREK1	Splicing regulatory glutamine/lysine-rich protein 1	19.9715	19.6789	19.9118	19.9567	20.1344	19.7968
	0.22789	0.108587	Q9UGP8	SEC63_HUMAN	SEC63	Translocation protein SEC63 homolog	19.3929	19.9654	19.8716	19.7572	19.9573	19.8412
	0.163815	0.10778	O14617;O14617-4;O14617-5	AP3D1_HUMAN	AP3D1	AP-3 complex subunit delta-1	19.1026	19.0684	18.6361	18.7712	19.4259	18.9333
	0.0574627	0.107166	P13674;P13674-2;P13674-3	P4HA1_HUMAN	P4HA1	Prolyl 4-hydroxylase subunit alpha-1	19.0052	18.1787	18.0648	18.0281	19.6655	17.8765
	0.142135	0.106766	P62263	RS14_HUMAN	RPS14	Small ribosomal subunit protein uS11	29.2339	29.9929	30.0675	29.8911	29.722	30.0015
	0.513882	0.106359	P46087;P46087-4	NOP2_HUMAN	NOP2	Probable 28S rRNA (cytosine(4447)-C(5))-methyltransferase	21.4624	21.7594	21.609	21.7679	21.7172	21.6648
	0.326602	0.105798	Q8IXH6	T53I2_HUMAN	TP53INP2	Tumor protein p53-inducible nuclear protein 2	21.4221	21.8637	21.6137	21.6651	21.7673	21.7845
	0.0785155	0.10409	Q15046;Q15046-2	SYK_HUMAN	KARS1	Lysine--tRNA ligase	20.1593	20.0172	20.3216	19.7135	21.1803	19.9166
	0.157165	0.104066	P60866;P60866-2	RS20_HUMAN	RPS20	Small ribosomal subunit protein uS10	28.7687	29.5515	29.2195	29.29	29.1073	29.4546
	0.230507	0.10239	P61353	RL27_HUMAN	RPL27	Large ribosomal subunit protein eL27	29.9818	30.0893	29.8439	30.1422	29.771	30.309
	0.173945	0.101012	P15880	RS2_HUMAN	RPS2	Small ribosomal subunit protein uS5	29.2014	29.7946	29.8243	29.7584	29.5417	29.8233
	0.0555411	0.0982901	Q86YZ3	HORN_HUMAN	HRNR	Hornerin	21.6475	20.7572	20.8104	20.9521	20.3656	22.1922
	0.286717	0.0958932	P04004	VTNC_HUMAN	VTN	Vitronectin	17.8606	18.0903	18.2342	18.0128	18.1712	18.2888
	0.311431	0.0953801	O95793;O95793-2	STAU1_HUMAN	STAU1	Double-stranded RNA-binding protein Staufen homolog 1	22.3623	22.6487	22.4166	22.4168	22.5718	22.7252
	0.081868	0.0945848	Q14008;Q14008-2;Q14008-3	CKAP5_HUMAN	CKAP5	Cytoskeleton-associated protein 5	19.4752	19.3459	18.6124	18.8644	19.8489	19.0039
	0.0510367	0.0943635	P81605	DCD_HUMAN	DCD	Dermcidin	25.0643	24.0469	23.2311	24.5847	23.509	24.5317
	0.194447	0.0934531	P39023	RL3_HUMAN	RPL3	Large ribosomal subunit protein uL3	29.4123	29.7582	29.4851	29.4747	29.5138	29.9474
	0.284725	0.0920391	Q00839	HNRPU_HUMAN	HNRNPU	Heterogeneous nuclear ribonucleoprotein U	24.8828	24.9911	25.2422	24.9892	25.1569	25.2461
	0.135001	0.0913207	Q02878	RL6_HUMAN	RPL6	Large ribosomal subunit protein eL6	29.338	30.1212	29.9846	29.958	29.7819	29.9779
	0.386993	0.0907389	P05141	ADT2_HUMAN	SLC25A5	ADP/ATP translocase 2	23.3459	23.1294	23.1398	23.2452	23.2096	23.4326
	0.121357	0.0898285	Q92615	LAR4B_HUMAN	LARP4B	La-related protein 4B	20.877	21.5514	21.7605	21.3985	21.531	21.5289
	0.233264	0.0884921	P82650	RT22_HUMAN	MRPS22	Small ribosomal subunit protein mS22	20.2669	20.6341	20.731	20.7056	20.5447	20.6471
	0.0977013	0.0881367	Q99623	PHB2_HUMAN	PHB2	Prohibitin-2	21.8423	20.9795	20.9371	21.2697	21.597	21.1566
	0.166206	0.0880928	Q9Y2R5	RT17_HUMAN	MRPS17	Small ribosomal subunit protein uS17m	20.0027	20.5393	20.6213	20.5432	20.3837	20.5006
	0.149648	0.0875187	Q9H0H5	RGAP1_HUMAN	RACGAP1	Rac GTPase-activating protein 1	19.9629	19.6309	19.2875	19.8436	19.5239	19.7764
	0.257435	0.0863018	Q9GZR7	DDX24_HUMAN	DDX24	ATP-dependent RNA helicase DDX24	20.8579	21.2836	20.9682	21.1047	21.0664	21.1975
	0.242158	0.0852165	Q9P0K7;Q9P0K7-2;Q9P0K7-3;Q9P0K7-4	RAI14_HUMAN	RAI14	Ankycorbin	21.778	21.5298	21.8679	22.0008	21.7157	21.7149
	0.213109	0.0847791	P46779	RL28_HUMAN	RPL28	Large ribosomal subunit protein eL28	29.373	29.785	29.6862	29.7298	29.5276	29.8412
	0.269099	0.0837847	P08865	RSSA_HUMAN	RPSA	Small ribosomal subunit protein uS2	29.1788	29.5316	29.5358	29.5488	29.5265	29.4221
	0.627168	0.0825799	P52272;P52272-2	HNRPM_HUMAN	HNRNPM	Heterogeneous nuclear ribonucleoprotein M	24.0014	24.0046	23.8757	24.0608	24.1043	23.9643
	0.245611	0.0813039	P55209;P55209-2	NP1L1_HUMAN	NAP1L1	Nucleosome assembly protein 1-like 1	24.2396	24.5335	24.2965	24.4104	24.6144	24.2888
	0.0619221	0.0807508	P05198	IF2A_HUMAN	EIF2S1	Eukaryotic translation initiation factor 2 subunit 1	21.221	21.0011	20.8686	20.5385	21.9782	20.8162
	0.300409	0.0793991	P30050	RL12_HUMAN	RPL12	Large ribosomal subunit protein uL11	29.6737	29.9408	29.6403	29.745	29.8303	29.9178
	0.161055	0.0793552	Q13501	SQSTM_HUMAN	SQSTM1	Sequestosome-1	21.6751	21.7352	22.2554	21.968	21.9982	21.9375
	0.0895981	0.0786622	P40429	RL13A_HUMAN	RPL13A	Large ribosomal subunit protein uL13	29.1383	29.451	29.4559	29.8541	28.863	29.564
	0.124556	0.0774981	E9PRG8	CK098_HUMAN	C11orf98	Uncharacterized protein C11orf98	25.0471	25.4981	25.0139	25.497	25.3511	24.9434
	0.106715	0.07632	Q9BY77;Q9BY77-2	PDIP3_HUMAN	POLDIP3	Polymerase delta-interacting protein 3	19.9529	19.9504	20.6752	20.3628	20.0855	20.3592
	0.130111	0.0754337	P50416	CPT1A_HUMAN	CPT1A	Carnitine O-palmitoyltransferase 1, liver isoform	20.5168	20.1747	20.0575	20.271	20.6296	20.0747
	0.0951705	0.0752277	Q68CQ4	UTP25_HUMAN	UTP25	U3 small nucleolar RNA-associated protein 25 homolog	18.5466	18.8667	18.9123	18.9783	18.3534	19.2196
	0.156658	0.0747515	Q9NQ29	LUC7L_HUMAN	LUC7L	Putative RNA-binding protein Luc7-like 1	22.4548	22.0736	21.9154	22.1115	22.1801	22.3764
	0.0694716	0.0746288	Q12906	ILF3_HUMAN	ILF3	Interleukin enhancer-binding factor 3	20.7192	20.3805	20.3488	20.007	21.2248	20.4407
	0.362486	0.0743033	Q96PY5;Q96PY5-3	FMNL2_HUMAN	FMNL2	Formin-like protein 2	20.8144	20.7154	20.8645	21.0192	20.8036	20.7943
	0.191901	0.0731093	Q8TDN6	BRX1_HUMAN	BRIX1	Ribosome biogenesis protein BRX1 homolog	22.6542	22.8986	22.7605	22.9339	22.5922	23.0065
	0.211871	0.0730782	P56537	IF6_HUMAN	EIF6	Eukaryotic translation initiation factor 6	25.4237	25.7765	25.6369	25.8406	25.6716	25.5441
	0.178106	0.0727202	Q13724;Q13724-2	MOGS_HUMAN	MOGS	Mannosyl-oligosaccharide glucosidase	19.8458	20.0319	19.8713	19.7101	20.1886	20.0685
	0.0536817	0.0716782	P41091	IF2G_HUMAN	EIF2S3	Eukaryotic translation initiation factor 2 subunit 3	21.9517	21.6334	21.823	21.2262	22.7408	21.6561
	0.232318	0.0715186	P62266	RS23_HUMAN	RPS23	Small ribosomal subunit protein uS12	28.8038	29.1747	28.9179	29.1314	29.0216	28.958
	0.0926886	0.0686461	Q7Z478	DHX29_HUMAN	DHX29	ATP-dependent RNA helicase DHX29	20.6404	21.1541	21.5497	21.1472	21.1787	21.2244
	0.107395	0.0682322	P62851	RS25_HUMAN	RPS25	Small ribosomal subunit protein eS25	29.3499	30.1018	29.7916	29.9434	29.6985	29.8061
	0.115649	0.0681636	P18124	RL7_HUMAN	RPL7	Large ribosomal subunit protein uL30	29.3208	29.9272	29.8244	29.828	29.555	29.8939
	0.215446	0.0669842	P61927	RL37_HUMAN	RPL37	Large ribosomal subunit protein eL37	26.7007	26.7889	26.9448	26.6843	26.9924	26.9586
	0.0580263	0.0666415	Q7Z4Q2	HEAT3_HUMAN	HEATR3	HEAT repeat-containing protein 3	18.4734	19.4558	19.7008	19.3353	19.0258	19.4688
	0.183851	0.0660941	Q9UNL2;Q9UNL2-2	SSRG_HUMAN	SSR3	Translocon-associated protein subunit gamma	21.7743	21.7129	21.6585	21.5625	22.0215	21.76
	0.0735434	0.0641435	Q14694;Q14694-2;Q14694-3	UBP10_HUMAN	USP10	Ubiquitin carboxyl-terminal hydrolase 10	19.4382	19.392	20.0712	19.5377	20.1211	19.4351
	0.130786	0.0640348	P62829	RL23_HUMAN	RPL23	Large ribosomal subunit protein uL14	29.4144	29.9397	29.8258	29.9543	29.6813	29.7364
	0.139462	0.0623391	P46783	RS10_HUMAN	RPS10	Small ribosomal subunit protein eS10	30.0908	30.2945	30.2214	30.5274	29.9932	30.2731
	0.101033	0.0602214	Q9HAV0	GBB4_HUMAN	GNB4	Guanine nucleotide-binding protein subunit beta-4	23.8067	23.4914	23.4299	23.9804	23.3758	23.5524
	0.208125	0.0598761	P62805	H4_HUMAN	H4C16	Histone H4	30.457	30.5473	30.3101	30.3668	30.6634	30.4639
	0.446363	0.0584647	Q9NZM5	NOP53_HUMAN	NOP53	Ribosome biogenesis protein NOP53	20.3446	20.1814	20.2098	20.3477	20.3033	20.2603
	0.119504	0.0584017	Q8WUY1	THEM6_HUMAN	THEM6	Protein THEM6	20.7614	20.4598	20.1898	20.4624	20.6626	20.4613
	0.095682	0.0583973	P61254	RL26_HUMAN	RPL26	Large ribosomal subunit protein uL24	29.9625	30.1834	29.6618	30.2924	29.7574	29.9331
	0.0936636	0.058267	P62841	RS15_HUMAN	RPS15	Small ribosomal subunit protein uS19	26.9977	27.3612	27.189	27.6144	26.9528	27.1554
	0.102255	0.0571423	Q96CT7	CC124_HUMAN	CCDC124	Coiled-coil domain-containing protein 124	23.1116	23.5733	22.962	23.1618	23.4299	23.2266
	0.0914144	0.0567958	P38935	SMBP2_HUMAN	IGHMBP2	DNA-binding protein SMUBP-2	20.8995	21.4339	21.4017	21.3181	21.0548	21.5325
	0.0194228	0.0563024	Q15021	CND1_HUMAN	NCAPD2	Condensin complex subunit 1	19.0762	18.648	17.9469	17.0129	20.1527	18.6745
	0.0792988	0.0552959	O75475	PSIP1_HUMAN	PSIP1	PC4 and SFRS1-interacting protein	20.7483	20.5135	20.3329	20.164	20.7355	20.8611
	0.0439467	0.0490004	Q9NYL9	TMOD3_HUMAN	TMOD3	Tropomodulin-3	23.046	22.0168	21.8358	22.4275	22.37	22.2481
	0.0246132	0.0477835	P26641;P26641-2	EF1G_HUMAN	EEF1G	Elongation factor 1-gamma	22.0517	21.3234	20.6302	21.0605	22.3706	20.7176
	0.101823	0.0469405	Q96KA5;Q96KA5-2	CLP1L_HUMAN	CLPTM1L	Lipid scramblase CLPTM1L	21.6578	21.1972	21.1343	21.3577	21.4061	21.3663
	0.0862671	0.046655	Q8ND76;Q8ND76-2;Q8ND76-3	CCNY_HUMAN	CCNY	Cyclin-Y	18.1751	17.8636	18.096	18.4162	17.8571	18.0015
	0.0985878	0.0464408	A0A2R8YEA7	A0A2R8YEA7_HUMAN	ACTB	Isoform of P60709, Actin beta (Fragment)	28.4728	28.4926	28.6024	28.799	28.6567	28.2516
	0.012128	0.0446472	P09001	RM03_HUMAN	MRPL3	Large ribosomal subunit protein uL3m	15.9456	18.4265	18.583	18.4445	15.9717	18.6728
	0.131642	0.0445124	Q8N3E9	PLCD3_HUMAN	PLCD3	1-phosphatidylinositol 4,5-bisphosphate phosphodiesterase delta-3	19.8395	19.6454	19.5188	19.8758	19.6474	19.614
	0.0635326	0.0442556	P29992	GNA11_HUMAN	GNA11	Guanine nucleotide-binding protein subunit alpha-11	19.39	18.9807	18.79	19.3357	19.1778	18.78
	0.0573689	0.0442467	Q14344	GNA13_HUMAN	GNA13	Guanine nucleotide-binding protein subunit alpha-13	20.1293	19.6422	19.8193	20.3584	19.6656	19.6996
	0.0460145	0.0438073	Q14257;Q14257-2	RCN2_HUMAN	RCN2	Reticulocalbin-2	23.1539	22.1276	22.5127	22.505	22.8979	22.5228
	0.165231	0.0428975	Q13595;Q13595-2;Q13595-3;Q13595-4	TRA2A_HUMAN	TRA2A	Transformer-2 protein homolog alpha	20.9554	21.009	20.9376	21.0553	20.8271	21.1483
	0.0898102	0.0423342	Q92522	H1X_HUMAN	H1-10	Histone H1.10	24.4721	24.7288	24.7961	24.6824	24.9547	24.487
	0.0684531	0.0410531	Q7Z417	NUFP2_HUMAN	NUFIP2	FMR1-interacting protein NUFIP2	21.8884	22.2331	22.6105	22.3219	22.2536	22.2796
	0.0326888	0.0389811	Q16643;Q16643-2;Q16643-3	DREB_HUMAN	DBN1	Drebrin	18.6736	17.3063	17.8029	18.0577	17.8959	17.9461
	0.0491813	0.0385265	Q8WUK0;Q8WUK0-2	PTPM1_HUMAN	PTPMT1	Phosphatidylglycerophosphatase and protein-tyrosine phosphatase 1	19.8417	19.5667	19.0128	19.5438	19.3025	19.6905
	0.132024	0.0383415	Q99933;Q99933-2	BAG1_HUMAN	BAG1	BAG family molecular chaperone regulator 1	20.9916	21.0928	21.1037	20.9129	21.2575	21.1328
	0.0647612	0.0380662	O75955	FLOT1_HUMAN	FLOT1	Flotillin-1	19.8148	19.2299	19.2849	19.592	19.5357	19.316
	0.0594084	0.0367311	Q9NX24	NHP2_HUMAN	NHP2	H/ACA ribonucleoprotein complex subunit 2	20.3096	20.6346	21.0004	20.8403	20.5996	20.6148
	0.124401	0.0350933	O00458	IFRD1_HUMAN	IFRD1	Interferon-related developmental regulator 1	22.9992	23.3305	23.1287	23.1188	23.2005	23.2444
	0.0631463	0.0339038	Q02241-2	KIF23_HUMAN	KIF23	Isoform of Q02241, Isoform 2 of Kinesin-like protein KIF23	20.4909	20.3552	20.1234	20.3232	20.1111	20.6369
	0.0421529	0.0337359	Q13435	SF3B2_HUMAN	SF3B2	Splicing factor 3B subunit 2	20.7905	20.6084	20.6245	20.3155	21.2164	20.5927
	0.0249744	0.0333792	Q9UBB4	ATX10_HUMAN	ATXN10	Ataxin-10	20.7591	20.852	21.1404	20.6365	21.8055	20.4096
	0.101221	0.0291812	Q14331	FRG1_HUMAN	FRG1	Protein FRG1	22.2296	22.3823	22.2511	22.1369	22.3743	22.4393
	0.0310086	0.0279992	P08708	RS17_HUMAN	RPS17	Small ribosomal subunit protein eS17	28.0326	28.7266	28.5923	28.6626	28.0448	28.7279
	0.0435939	0.0225569	P39019	RS19_HUMAN	RPS19	Small ribosomal subunit protein eS19	29.4622	29.9749	29.9603	29.8805	29.7167	29.8679
	0.03242	0.0225023	P62873	GBB1_HUMAN	GNB1	Guanine nucleotide-binding protein G(I)/G(S)/G(T) subunit beta-1	23.1007	22.8224	22.9385	23.406	22.6805	22.8427
	0.0188012	0.0219396	O75781	PALM_HUMAN	PALM	Paralemmin-1	22.4766	21.1864	21.558	21.8033	21.8394	21.6441
	0.018058	0.0214125	P18077	RL35A_HUMAN	RPL35A	Large ribosomal subunit protein eL33	28.4284	29.4432	29.4158	29.3522	28.6993	29.3001
	0.0353632	0.0213947	P62280	RS11_HUMAN	RPS11	Small ribosomal subunit protein uS17	28.9265	29.4979	29.5517	29.341	29.2743	29.4249
	0.0552277	0.0213566	Q7L2E3-2	DHX30_HUMAN	DHX30	Isoform of Q7L2E3, Isoform 2 of ATP-dependent RNA helicase DHX30	23.0771	23.4742	23.3963	23.3615	23.232	23.4182
	0.0236957	0.0207024	Q14156;Q14156-2	EFR3A_HUMAN	EFR3A	Protein EFR3 homolog A	20.1994	19.4201	19.4463	19.8875	19.4296	19.8107
	0.0172576	0.0206121	P04156	PRIO_HUMAN	PRNP	Major prion protein	20.6792	19.8601	19.3602	20.1752	19.8501	19.936
	0.0164072	0.0203781	Q8IZL8	PELP1_HUMAN	PELP1	Proline-, glutamic acid- and leucine-rich protein 1	18.0769	18.9977	18.7239	19.0986	18.043	18.718
	0.0465773	0.0201969	Q9BZE4	GTPB4_HUMAN	GTPBP4	GTP-binding protein 4	23.0403	23.516	23.2405	23.2909	23.1884	23.378
	0.048557	0.0193361	Q13823	NOG2_HUMAN	GNL2	Nucleolar GTP-binding protein 2	20.79	21.2101	21.1106	21.1276	20.958	21.0832
	0.0579578	0.0177409	Q9Y2R9	RT07_HUMAN	MRPS7	Small ribosomal subunit protein uS7m	19.9087	20.1843	20.0089	20.0121	19.9576	20.1855
	0.0344615	0.0142816	P60709;P63261	ACTB_HUMAN;ACTG_HUMAN	ACTB;ACTG1	Actin, cytoplasmic 1	26.9726	26.68	26.9104	26.9701	26.9835	26.6523
	0.00871541	0.0122515	Q14160;Q14160-2;Q14160-3	SCRIB_HUMAN	SCRIB	Protein scribble homolog	18.5739	17.2908	17.1268	17.5609	17.7941	17.6733
	0.00571927	0.0120653	Q9H2M9;Q9H2M9-2	RBGPR_HUMAN	RAB3GAP2	Rab3 GTPase-activating protein non-catalytic subunit	21.0668	19.7605	18.7405	19.6019	20.1501	19.8519
	0.0125243	0.0106284	Q9UKS6	PACN3_HUMAN	PACSIN3	Protein kinase C and casein kinase substrate in neurons protein 3	21.4147	20.606	20.7168	21.0445	21.0426	20.6821
	0.00293331	0.00911204	Q6UUV7;Q6UUV7-3	CRTC3_HUMAN	CRTC3	CREB-regulated transcription coactivator 3	15.637	14.7735	16.5203	17.4147	14.7446	14.7989
	0.0120039	0.00900332	O00767	SCD_HUMAN	SCD	Stearoyl-CoA desaturase	21.5716	21.3308	20.8304	21.165	21.4848	21.1099
	0.00337836	0.00843684	O43719	HTSF1_HUMAN	HTATSF1	HIV Tat-specific factor 1	16.1731	14.266	15.6202	14.2972	16.3274	15.46
	0.018321	0.00775782	O75367;O75367-1;O75367-3	H2AY_HUMAN	MACROH2A1	Core histone macro-H2A.1	24.0392	24.4559	24.3867	24.1924	24.3317	24.3809
	0.0110272	0.00769424	P63092;P63092-4;Q5JWF2	GNAS1_HUMAN;GNAS2_HUMAN	GNAS	Isoform of Q5JWF2, Guanine nucleotide-binding protein G(s) subunit alpha isoforms short	26.9233	26.3197	26.3041	26.7226	26.4905	26.357
	0.00957042	0.00684166	Q86V81	THOC4_HUMAN	ALYREF	THO complex subunit 4	24.9729	24.998	25.3761	25.2365	24.7408	25.3902
	0.0151666	0.00337219	Q8NE71;Q8NE71-2	ABCF1_HUMAN	ABCF1	ATP-binding cassette sub-family F member 1	23.6373	23.7664	23.7204	23.6915	23.6132	23.8295
	0.00277955	0.00217628	P62861	RS30_HUMAN	FAU	Ubiquitin-like FUBI-ribosomal protein eS30 fusion protein	29.6163	30.0297	29.843	30.1681	29.4016	29.9259
	0.00208565	0.00170326	O15479	MAGB2_HUMAN	MAGEB2	Melanoma-associated antigen B2	19.6779	20.3235	20.2245	20.2288	19.727	20.2752
	0.00240318	0.00142415	Q96PK6	RBM14_HUMAN	RBM14	RNA-binding protein 14	22.1027	21.8803	22.3946	22.3132	21.8931	22.1756
	0.00112296	0.00142288	P51571	SSRD_HUMAN	SSR4	Translocon-associated protein subunit delta	20.064	19.8555	19.4793	19.5772	20.535	19.2909
	0.00033421	-0.000328064	Q9NR30	DDX21_HUMAN	DDX21	Nucleolar RNA helicase 2	23.0286	23.9174	23.9804	23.6302	23.4943	23.8009
	0.00448618	-0.00259781	Q14980;Q14980-2	NUMA1_HUMAN	NUMA1	Nuclear mitotic apparatus protein 1	17.8969	18.4171	18.1963	17.9596	18.1864	18.3565
	0.00449085	-0.00297928	P04843	RPN1_HUMAN	RPN1	Dolichyl-diphosphooligosaccharide--protein glycosyltransferase subunit 1	21.8869	21.6809	21.8175	21.5689	22.209	21.5985
	0.00334434	-0.00415738	P62891;Q59GN2	R39L5_HUMAN;RL39_HUMAN	RPL39;RPL39P5	Large ribosomal subunit protein eL39	28.6677	29.6265	29.7571	29.6719	28.934	29.4329
	0.0560997	-0.00442759	Q15149	PLEC_HUMAN	PLEC	Plectin	25.3079	25.3581	25.307	25.3426	25.2771	25.3401
	0.00541514	-0.0053196	P06241	FYN_HUMAN	FYN	Tyrosine-protein kinase Fyn	23.8058	22.9346	22.9478	23.5086	23.1133	23.0502
	0.00473517	-0.00541433	P41252	SYIC_HUMAN	IARS1	Isoleucine--tRNA ligase, cytoplasmic	23.829	23.4446	23.5482	23.3195	24.3099	23.1763
	0.00408181	-0.00544167	O75821	EIF3G_HUMAN	EIF3G	Eukaryotic translation initiation factor 3 subunit G	22.564	23.3147	24.0594	23.2916	23.4234	23.2068
	0.0228832	-0.00585683	Q9Y5B9	SP16H_HUMAN	SUPT16H	FACT complex subunit SPT16	25.1541	25.0538	25.3382	25.1531	25.2147	25.1607
	0.00791238	-0.00661151	Q14254	FLOT2_HUMAN	FLOT2	Flotillin-2	20.396	19.6695	19.7008	20.1869	19.7319	19.8276
	0.0191555	-0.00669161	Q9BX40;Q9BX40-2	LS14B_HUMAN	LSM14B	Protein LSM14 homolog B	21.1963	21.3675	21.3332	21.1529	21.2288	21.4952
	0.0182405	-0.00718562	P62424	RL7A_HUMAN	RPL7A	Large ribosomal subunit protein eL8	29.8556	30.2605	30.1223	30.179	29.9959	30.042
	0.00716474	-0.00742563	Q9C086	IN80B_HUMAN	INO80B	INO80 complex subunit B	16.5142	16.9849	15.8828	16.2226	16.6106	16.5264
	0.00683611	-0.00824928	P62277	RS13_HUMAN	RPS13	Small ribosomal subunit protein uS15	28.7924	29.8792	29.842	29.6757	29.1498	29.6633
	0.0105846	-0.0093174	A0A8V8TMQ1	A0A8V8TMQ1_HUMAN	FXR1	Isoform of P51114, RNA-binding protein FXR1	20.0513	20.7273	20.9943	20.5522	20.7216	20.471
	0.0115761	-0.0120538	Q9NUQ6;Q9NUQ6-3;Q9NUQ6-4	SPS2L_HUMAN	SPATS2L	SPATS2-like protein	24.0552	24.9598	25.0885	24.611	24.5478	24.9086
	0.0124839	-0.0124276	Q9H6F5	CCD86_HUMAN	CCDC86	Coiled-coil domain-containing protein 86	18.6698	19.6833	19.2272	19.3191	18.8829	19.341
	0.0311121	-0.0155455	Q6DKI1	RL7L_HUMAN	RPL7L1	Ribosomal protein uL30-like	22.3642	22.5509	22.3255	22.3055	22.1911	22.6974
	0.0189905	-0.0161165	O15260;O15260-2	SURF4_HUMAN	SURF4	Surfeit locus protein 4	22.6272	22.1389	21.8572	22.3823	22.3414	21.8512
	0.0210812	-0.0163047	Q5BJF2	SGMR2_HUMAN	TMEM97	Sigma intracellular receptor 2	21.4475	20.723	20.8658	20.7516	21.2043	21.0315
	0.0181925	-0.0177224	Q8NCA5	FA98A_HUMAN	FAM98A	Protein FAM98A	20.4721	20.9268	21.5851	20.9498	20.9616	21.0193
	0.04058	-0.0184186	Q15149-8	PLEC_HUMAN	PLEC	Isoform of Q15149, Isoform 8 of Plectin	20.7653	20.7191	20.3403	20.4411	20.6879	20.6403
	0.0320141	-0.019455	P62906	RL10A_HUMAN	RPL10A	Large ribosomal subunit protein uL1	28.7321	29.2903	29.2949	29.139	28.9214	29.1986
	0.0616317	-0.0199788	P62750	RL23A_HUMAN	RPL23A	Large ribosomal subunit protein uL23	30.1469	30.5174	30.3224	30.3459	30.3413	30.2394
	0.022979	-0.0203031	P61225	RAP2B_HUMAN	RAP2B	Ras-related protein Rap-2b	17.6541	17.4361	17.1371	17.8974	17.1297	17.1393
	0.03421	-0.020846	P62269	RS18_HUMAN	RPS18	Small ribosomal subunit protein uS13	29.7446	30.266	29.9047	30.1266	29.6821	30.0441
	0.0393021	-0.0211423	O43390	HNRPR_HUMAN	HNRNPR	Heterogeneous nuclear ribonucleoprotein R	22.2535	21.818	22.0064	21.7664	22.0247	22.2234
	0.0328119	-0.0220807	F8W7C6	F8W7C6_HUMAN	RPL10	Isoform of P27635, Ribosomal protein L10	21.0989	20.6652	20.4017	20.6748	20.8867	20.5381
	0.0312077	-0.0252457	P62241	RS8_HUMAN	RPS8	Small ribosomal subunit protein eS8	29.0578	29.8836	29.8382	29.6512	29.4796	29.573
	0.0593469	-0.0254269	Q08945	SSRP1_HUMAN	SSRP1	FACT complex subunit SSRP1	25.2948	25.5378	25.7999	25.5737	25.4904	25.4921
	0.0326272	-0.0260359	Q8WWM7	ATX2L_HUMAN	ATXN2L	Ataxin-2-like protein	21.8494	22.2153	22.7454	22.2729	22.3478	22.1114
	0.0508065	-0.0262063	P83731	RL24_HUMAN	RPL24	Large ribosomal subunit protein eL24	29.613	30.1829	29.9612	29.9972	29.7813	29.8999
	0.058397	-0.0262826	P61313	RL15_HUMAN	RPL15	Large ribosomal subunit protein eL15	29.7342	30.1883	30.1603	30.0651	29.899	30.0398
	0.0492418	-0.0264886	Q86UY6	NAA40_HUMAN	NAA40	N-alpha-acetyltransferase 40	19.5306	20.1427	19.9131	19.7636	19.82	19.9233
	0.0417947	-0.0272725	P23396	RS3_HUMAN	RPS3	Small ribosomal subunit protein uS3	28.7826	29.3116	29.3394	29.088	28.9103	29.3535
	0.0236312	-0.027825	P80723	BASP1_HUMAN	BASP1	Brain acid soluble protein 1	26.0158	24.947	24.8813	25.4932	25.2609	25.0065
	0.0605403	-0.028712	P63220	RS21_HUMAN	RPS21	Small ribosomal subunit protein eS21	28.9483	29.246	29.2877	29.1256	28.9186	29.3515
	0.0546616	-0.029019	P62913;P62913-2	RL11_HUMAN	RPL11	Large ribosomal subunit protein uL5	29.5975	29.9715	30.144	29.814	29.7657	30.0463
	0.0213927	-0.0308043	A5YKK6	CNOT1_HUMAN	CNOT1	CCR4-NOT transcription complex subunit 1	18.0894	17.8121	17.7602	17.7045	18.7344	17.1303
	0.0530209	-0.0357755	P08754	GNAI3_HUMAN	GNAI3	Guanine nucleotide-binding protein G(i) subunit alpha-3	25.0023	24.4401	24.2871	24.701	24.432	24.4891
	0.0766609	-0.0360934	P61247	RS3A_HUMAN	RPS3A	Small ribosomal subunit protein eS1	29.2666	29.7524	29.6479	29.5628	29.3732	29.6226
	0.0609473	-0.0369288	P62910	RL32_HUMAN	RPL32	Large ribosomal subunit protein eL32	29.068	29.6741	29.5902	29.549	29.2384	29.4342
	0.168376	-0.0381616	P62316;P62316-2	SMD2_HUMAN	SNRPD2	Small nuclear ribonucleoprotein Sm D2	22.7365	22.6502	22.5083	22.6181	22.4905	22.672
	0.602673	-0.0381864	P11387	TOP1_HUMAN	TOP1	DNA topoisomerase 1	22.1034	22.127	22.1898	22.0861	22.125	22.0945
	0.15507	-0.038566	Q9NW13	RBM28_HUMAN	RBM28	RNA-binding protein 28	21.5281	21.8276	21.7237	21.7034	21.6626	21.5978
	0.125713	-0.0388718	O95218;O95218-2	ZRAB2_HUMAN	ZRANB2	Zinc finger Ran-binding domain-containing protein 2	23.1142	23.1809	23.2006	23.2549	22.9071	23.2171
	0.126752	-0.04223	P05787;P05787-2	K2C8_HUMAN	KRT8	Keratin, type II cytoskeletal 8	26.3758	26.2231	26.0228	26.2966	26.0793	26.1191
	0.0569398	-0.0446618	Q9ULV0	MYO5B_HUMAN	MYO5B	Unconventional myosin-Vb	20.988	20.401	20.1731	20.697	20.2817	20.4493
	0.0213149	-0.0461241	Q6PK04	CC137_HUMAN	CCDC137	Coiled-coil domain-containing protein 137	19.1528	20.4357	20.7609	20.4719	19.0219	20.7172
	0.0674871	-0.0472177	Q9NX58	LYAR_HUMAN	LYAR	Cell growth-regulating nucleolar protein	21.2846	21.9021	21.8263	21.8422	21.3424	21.6868
	0.111118	-0.0473232	Q71RC2;Q71RC2-4	LARP4_HUMAN	LARP4	La-related protein 4	22.1415	22.4284	22.6726	22.3966	22.3484	22.3556
	0.0520762	-0.0478249	Q13601	KRR1_HUMAN	KRR1	KRR1 small subunit processome component homolog	19.3893	20.07	20.0016	19.9995	19.3122	20.0057
	0.100299	-0.048577	O75695	XRP2_HUMAN	RP2	Protein XRP2	21.0697	20.5959	20.9022	21.0086	20.7573	20.6561
	0.104745	-0.0525653	P63173	RL38_HUMAN	RPL38	Large ribosomal subunit protein eL38	29.224	29.7621	29.5526	29.5186	29.2831	29.5793
	0.0811221	-0.0528564	Q15286	RAB35_HUMAN	RAB35	Ras-related protein Rab-35	21.492	21.1316	21.4316	21.5113	21.489	20.8964
	0.0529698	-0.0529722	Q96AG4	LRC59_HUMAN	LRRC59	Leucine-rich repeat-containing protein 59	24.713	24.76	24.866	24.8958	24.0694	25.2149
	0.086094	-0.0543213	O43809	CPSF5_HUMAN	NUDT21	Cleavage and polyadenylation specificity factor subunit 5	20.903	20.5724	21.2249	20.7017	20.7496	21.086
	0.0307198	-0.0561434	P60660;P60660-2	MYL6_HUMAN	MYL6	Myosin light polypeptide 6	28.2414	26.6292	26.2327	26.8988	27.0246	27.0114
	0.0508466	-0.0562878	P62249	RS16_HUMAN	RPS16	Small ribosomal subunit protein uS9	29.1094	29.6893	29.8883	29.7596	28.9081	29.8505
	0.0904441	-0.056509	O43795	MYO1B_HUMAN	MYO1B	Unconventional myosin-Ib	23.9395	23.2451	23.3107	23.4598	23.4682	23.3978
	0.0892046	-0.0582822	Q12965	MYO1E_HUMAN	MYO1E	Unconventional myosin-Ie	24.0019	23.666	23.2136	23.4932	23.6417	23.5717
	0.0475578	-0.0599556	P35580	MYH10_HUMAN	MYH10	Myosin-10	22.5704	21.4157	21.1979	21.8072	21.625	21.5719
	0.108107	-0.0602983	Q12894	IFRD2_HUMAN	IFRD2	Interferon-related developmental regulator 2	22.1905	22.6141	22.482	22.33	22.1163	22.6593
	0.133796	-0.0628916	Q9BRT6	LLPH_HUMAN	LLPH	Protein LLP homolog	22.7334	23.3068	23.0164	23.0328	22.8597	22.9754
	0.039458	-0.0638224	Q9NZM1;Q9NZM1-6	MYOF_HUMAN	MYOF	Myoferlin	20.0899	18.9474	18.9977	19.2029	20.0166	18.6241
	0.0755416	-0.063947	P62979	RS27A_HUMAN	RPS27A	Ubiquitin-ribosomal protein eS31 fusion protein	27.2014	28.0596	28.1139	27.7406	27.6623	27.7802
	0.0723954	-0.0651182	Q16651;Q16651-2	PRSS8_HUMAN	PRSS8	Prostasin	20.4565	19.6741	19.5055	19.9772	19.8754	19.5881
	0.0996972	-0.0679557	P54136	SYRC_HUMAN	RARS1	Arginine--tRNA ligase, cytoplasmic	20.8425	20.5494	20.65	20.4673	21.0614	20.3094
	0.111989	-0.068786	P52907	CAZA1_HUMAN	CAPZA1	F-actin-capping protein subunit alpha-1	23.4071	22.8043	22.7309	22.9066	23.019	22.8101
	0.0759942	-0.0689602	P16615;P16615-2;P16615-3;P16615-4;P16615-5	AT2A2_HUMAN	ATP2A2	Sarcoplasmic/endoplasmic reticulum calcium ATPase 2	20.3902	19.352	19.6257	19.8137	19.7707	19.5767
	0.31185	-0.0717258	P04844;P04844-2	RPN2_HUMAN	RPN2	Dolichyl-diphosphooligosaccharide--protein glycosyltransferase subunit 2	20.178	20.0284	20.1186	20.0757	20.1573	19.8769
	0.22114	-0.0723286	P84098	RL19_HUMAN	RPL19	Large ribosomal subunit protein eL19	30.3614	30.6083	30.3326	30.2063	30.5273	30.3518
	0.101705	-0.0723928	P63096	GNAI1_HUMAN	GNAI1	Guanine nucleotide-binding protein G(i) subunit alpha-1	23.1316	22.5247	22.3397	22.7742	22.4967	22.5078
	0.190048	-0.0730438	Q9H7B2	RPF2_HUMAN	RPF2	Ribosome production factor 2 homolog	20.8623	21.245	20.9556	21.0021	20.7694	21.0721
	0.262857	-0.0773436	Q9UKD2	MRT4_HUMAN	MRTO4	mRNA turnover protein 4 homolog	24.4335	24.6879	24.4422	24.5181	24.2789	24.5345
	0.243616	-0.0779972	P48634	PRC2A_HUMAN	PRRC2A	Protein PRRC2A	20.9312	20.76	21.1617	20.8298	20.8176	20.9716
	0.373835	-0.0784041	P05783	K1C18_HUMAN	KRT18	Keratin, type I cytoskeletal 18	27.0447	27.1114	27.1109	27.1718	26.9769	26.883
	0.0489932	-0.0790494	Q8IY21	DDX60_HUMAN	DDX60	Probable ATP-dependent RNA helicase DDX60	17.2257	17.4326	18.2601	18.1267	16.662	17.8926
	0.107899	-0.0806249	Q9NVU7	SDA1_HUMAN	SDAD1	Protein SDA1 homolog	21.9636	22.5115	22.3513	22.3619	21.7675	22.4552
	0.115319	-0.0827243	P47756	CAPZB_HUMAN	CAPZB	F-actin-capping protein subunit beta	23.2694	22.797	22.56	22.8894	23.0019	22.4868
	0.11957	-0.0847104	P36578	RL4_HUMAN	RPL4	Large ribosomal subunit protein uL4	29.9863	30.4747	30.3366	30.4003	29.7543	30.3888
	0.153801	-0.0877546	O76021	RL1D1_HUMAN	RSL1D1	Ribosomal L1 domain-containing protein 1	22.4129	22.9803	22.5938	22.6687	22.3136	22.7414
	0.15175	-0.0881399	P07948-2	LYN_HUMAN	LYN	Isoform of P07948, Isoform 2 of Tyrosine-protein kinase Lyn	21.8186	21.3125	21.2157	21.5577	21.3462	21.1785
	0.720645	-0.0884444	Q71UM5	RS27L_HUMAN	RPS27L	Ribosomal protein eS27-like	26.7982	26.8594	26.7799	26.8128	26.7222	26.6371
	0.0816673	-0.0889562	H3BUF6	H3BUF6_HUMAN	ATXN2L	Isoform of Q8WWM7, Ataxin 2 like	17.621	18.4285	18.8493	18.3554	17.9404	18.3361
	0.168641	-0.089365	P07947	YES_HUMAN	YES1	Tyrosine-protein kinase Yes	22.2917	21.7337	21.7742	21.8673	21.681	21.9833
	0.11935	-0.0897675	Q9Y4F1;Q9Y4F1-2	FARP1_HUMAN	FARP1	FERM, ARHGEF and pleckstrin domain-containing protein 1	23.9947	23.2742	23.1875	23.5616	23.4042	23.2212
	0.0929913	-0.0911058	Q07020	RL18_HUMAN	RPL18	Large ribosomal subunit protein eL18	28.9154	29.7804	29.7969	29.7644	29.1	29.355
	0.139276	-0.0911725	Q5TC63;Q5TC63-3	GRTP1_HUMAN	GRTP1	Growth hormone-regulated TBC protein 1	19.7511	19.0636	19.0026	19.118	19.2246	19.2012
	0.126635	-0.0913951	P0CG12	DERPC_HUMAN	DERPC	Decreased expression in renal and prostate cancer protein	19.9548	19.4152	20.2123	19.7283	19.9975	19.5823
	0.11884	-0.0919412	Q14126	DSG2_HUMAN	DSG2	Desmoglein-2	23.392	22.7012	22.5143	22.9575	22.6998	22.6745
	0.251145	-0.0919431	Q969Q0	RL36L_HUMAN	RPL36AL	Ribosomal protein eL42-like	29.1777	29.6071	29.1834	29.2789	29.1781	29.2353
	0.0694316	-0.0920963	Q9Y608-4	LRRF2_HUMAN	LRRFIP2	Isoform of Q9Y608, Isoform 4 of Leucine-rich repeat flightless-interacting protein 2	22.7677	21.7166	21.2083	21.935	21.7367	21.7446
	0.223293	-0.094396	Q92804;Q92804-2	RBP56_HUMAN	TAF15	TATA-binding protein-associated factor 2N	26.387	25.9337	26.3492	26.2853	26.0397	26.0616
	0.332102	-0.0948486	O60814;P57053;P58876;P62807;Q5QNW6;Q5QNW6-2;Q93079;Q99877;Q99879	H2B1C_HUMAN;H2B1D_HUMAN;H2B1H_HUMAN;H2B1K_HUMAN;H2B1M_HUMAN;H2B1N_HUMAN;H2B2F_HUMAN;H2BFS_HUMAN	H2BC10;H2BC12;H2BC12L;H2BC14;H2BC15;H2BC18;H2BC5;H2BC9	Histone H2B type 1-K	28.8908	29.0501	29.2077	28.8153	28.9812	29.0676
	0.175632	-0.0981522	O94880;O94880-1	PHF14_HUMAN	PHF14	PHD finger protein 14	19.3243	19.1634	19.1055	18.9023	19.5027	18.8937
	0.189164	-0.098374	O95425;O95425-2;O95425-3;O95425-4	SVIL_HUMAN	SVIL	Supervillin	20.9311	20.3822	20.3014	20.4736	20.401	20.445
	0.279509	-0.099575	Q9BU76;Q9BU76-4	MMTA2_HUMAN	MMTAG2	Multiple myeloma tumor-associated protein 2	22.5858	22.2673	22.0996	22.2455	22.1985	22.2099
	0.144014	-0.100262	P05186	PPBT_HUMAN	ALPL	Alkaline phosphatase, tissue-nonspecific isozyme	21.019	20.3535	20.333	20.704	20.2709	20.4298
	0.38473	-0.100962	P09874	PARP1_HUMAN	PARP1	Poly [ADP-ribose] polymerase 1	23.2662	23.3799	23.6177	23.2459	23.3406	23.3744
	0.124332	-0.101528	Q9C0B5;Q9C0B5-2	ZDHC5_HUMAN	ZDHHC5	Palmitoyltransferase ZDHHC5	18.9815	18.3444	18.0811	18.4027	18.5789	18.1208
	0.12337	-0.101651	O43251;O43251-10;O43251-2;O43251-4;O43251-5;O43251-6;O43251-7;O43251-8;O43251-9;Q9NWB1;Q9NWB1-2;Q9NWB1-3;Q9NWB1-4;Q9NWB1-5	RFOX1_HUMAN;RFOX2_HUMAN	RBFOX1;RBFOX2	RNA binding protein fox-1 homolog 2	17.7584	18.2204	17.9809	17.7888	18.3932	17.4727
	0.099641	-0.104693	P07477	TRY1_HUMAN	PRSS1	Serine protease 1	25.7565	25.2305	24.723	25.3582	24.6712	25.3666
	0.252528	-0.113093	P62879	GBB2_HUMAN	GNB2	Guanine nucleotide-binding protein G(I)/G(S)/G(T) subunit beta-2	25.8059	25.6156	25.7106	25.9355	25.4216	25.4357
	0.877358	-0.115469	Q14157;Q14157-5	UBP2L_HUMAN	UBAP2L	Ubiquitin-associated protein 2-like	22.9876	22.8163	22.8095	22.7224	22.7881	22.7565
	0.157244	-0.118441	P47755	CAZA2_HUMAN	CAPZA2	F-actin-capping protein subunit alpha-2	21.7543	21.1119	21.1218	21.4757	21.3038	20.8531
	0.154303	-0.122206	Q0ZGT2;Q0ZGT2-4	NEXN_HUMAN	NEXN	Nexilin	21.0167	20.6679	20.0834	20.6261	20.5348	20.2403
	0.100202	-0.122387	Q27J81;Q27J81-2	INF2_HUMAN	INF2	Inverted formin-2	19.7717	18.2572	18.9371	18.8965	18.8745	18.8279
	0.548222	-0.122401	P47914	RL29_HUMAN	RPL29	Large ribosomal subunit protein eL29	30.1557	30.3983	30.4169	30.2613	30.0983	30.2442
	0.564476	-0.125823	Q12899	TRI26_HUMAN	TRIM26	Tripartite motif-containing protein 26	22.3575	22.6755	22.6216	22.4423	22.4327	22.4021
	0.0997104	-0.126231	Q96RT1;Q96RT1-2;Q96RT1-3;Q96RT1-4;Q96RT1-5;Q96RT1-6;Q96RT1-7;Q96RT1-8;Q96RT1-9	ERBIN_HUMAN	ERBIN	Erbin	18.4901	18.4596	17.275	18.3771	17.768	17.7009
	0.0852532	-0.127947	Q12904;Q12904-2	AIMP1_HUMAN	AIMP1	Aminoacyl tRNA synthase complex-interacting multifunctional protein 1	20.4948	19.7107	20.1239	19.6574	20.9291	19.3591
	0.713406	-0.128617	Q15050	RRS1_HUMAN	RRS1	Ribosome biogenesis regulatory protein homolog	22.1125	22.3379	22.1937	22.1848	22.0403	22.0332
	0.174462	-0.130726	Q9NQX4	MYO5C_HUMAN	MYO5C	Unconventional myosin-Vc	23.3375	22.7284	22.5726	22.9859	22.4396	22.8208
	0.298798	-0.131634	Q9BYG3	MK67I_HUMAN	NIFK	MKI67 FHA domain-interacting nucleolar phosphoprotein	21.9908	22.5007	22.075	22.1143	21.8915	22.1659
	0.226533	-0.1317	P09132	SRP19_HUMAN	SRP19	Signal recognition particle 19 kDa protein	21.3855	21.7634	22.0736	21.5262	21.4738	21.8274
	0.479777	-0.131804	Q9H089	LSG1_HUMAN	LSG1	Large subunit GTPase 1 homolog	23.5642	23.72	23.3433	23.4887	23.3236	23.4199
	0.198511	-0.132157	Q6YHK3;Q6YHK3-2	CD109_HUMAN	CD109	CD109 antigen	19.1057	19.1153	19.4307	19.549	18.8879	18.8182
	0.341616	-0.1324	Q15477	SKI2_HUMAN	SKIC2	Superkiller complex protein 2	22.5744	22.9443	22.9032	22.7957	22.456	22.7729
	0.234234	-0.133682	Q5TAQ9	DCAF8_HUMAN	DCAF8	DDB1- and CUL4-associated factor 8	19.5981	19.2164	18.8896	19.0046	19.2838	19.0146
	0.318446	-0.134098	Q15370;Q15370-2	ELOB_HUMAN	ELOB	Elongin-B	19.6994	19.6579	19.6254	19.7367	19.1876	19.656
	0.0916579	-0.134864	P42356	PI4KA_HUMAN	PI4KA	Phosphatidylinositol 4-kinase alpha	20.6689	19.2483	19.75	19.8762	20.2362	19.1502
	0.153255	-0.135411	P09923	PPBI_HUMAN	ALPI	Intestinal-type alkaline phosphatase	21.7378	21.2823	20.8508	21.5257	20.8051	21.1339
	0.469568	-0.136981	P49207	RL34_HUMAN	RPL34	Large ribosomal subunit protein eL34	29.53	29.6947	29.4726	29.5186	29.215	29.5528
	0.137076	-0.137241	P14923	PLAK_HUMAN	JUP	Junction plakoglobin	23.7969	23.071	22.9696	23.5768	22.6701	23.1788
	0.140303	-0.138348	Q13045-2	FLII_HUMAN	FLII	Isoform of Q13045, Isoform 2 of Protein flightless-1 homolog	21.638	20.6766	20.4726	20.8758	20.8316	20.6647
	0.4947	-0.13949	O75569	PRKRA_HUMAN	PRKRA	Interferon-inducible double-stranded RNA-dependent protein kinase activator A	20.8712	21.2696	21.1732	21.018	20.9296	20.9478
	0.241752	-0.13991	P05388	RLA0_HUMAN	RPLP0	Large ribosomal subunit protein uL10	28.7341	29.3915	29.3266	29.1381	28.8332	29.0612
	0.250201	-0.140017	P62273;P62273-2	RS29_HUMAN	RPS29	Small ribosomal subunit protein uS14	27.8852	28.4881	28.5314	28.2979	28.149	28.0376
	0.304608	-0.140261	O95478	NSA2_HUMAN	NSA2	Ribosome biogenesis protein NSA2 homolog	21.3046	21.6773	21.602	21.5656	21.0918	21.5057
	0.127081	-0.14099	Q02543	RL18A_HUMAN	RPL18A	Large ribosomal subunit protein eL20	29.1286	29.8863	29.9249	29.8043	28.8791	29.8334
	0.377401	-0.141991	A5A3E0	POTEF_HUMAN	POTEF	POTE ankyrin domain family member F	27.7453	27.5816	27.7085	27.7503	27.6116	27.2476
	0.121319	-0.142176	Q8TBK6;Q8TBK6-2	ZCH10_HUMAN	ZCCHC10	Zinc finger CCHC domain-containing protein 10	20.4989	19.5933	19.0401	19.6372	19.4799	19.5886
	0.450344	-0.144131	P16401	H15_HUMAN	H1-5	Histone H1.5	27.5464	27.9035	27.6231	27.7164	27.4687	27.4556
	0.127768	-0.144547	O15027;O15027-5	SC16A_HUMAN	SEC16A	Protein transport protein Sec16A	20.2411	19.2353	19.141	19.138	19.8316	19.2142
	0.086732	-0.145427	F5GXR3	F5GXR3_HUMAN	PTMS	Isoform of P20962, Parathymosin	17.5337	18.8539	18.7004	18.4008	17.4071	18.8437
	0.243026	-0.146868	Q8WYP5;Q8WYP5-2;Q8WYP5-3	ELYS_HUMAN	AHCTF1	Protein ELYS	18.3715	18.4527	17.8896	17.7807	18.1699	18.3227
	0.472729	-0.147181	P42766	RL35_HUMAN	RPL35	Large ribosomal subunit protein uL29	30.1622	30.3732	30.2125	30.2986	29.8875	30.1203
	0.120714	-0.149419	P42677	RS27_HUMAN	RPS27	Small ribosomal subunit protein eS27	28.1247	28.7539	28.697	28.807	27.5676	28.7528
	0.221783	-0.149431	P04899	GNAI2_HUMAN	GNAI2	Guanine nucleotide-binding protein G(i) subunit alpha-2	25.5275	24.7456	24.9056	25.131	24.8087	24.7908
	0.632965	-0.150639	Q6P5R6	RL22L_HUMAN	RPL22L1	Ribosomal protein eL22-like	24.8063	25.0268	25.0142	24.6623	24.7941	24.9391
	0.282292	-0.15332	Q86U38;Q86U38-2	NOP9_HUMAN	NOP9	Nucleolar protein 9	18.2572	18.6251	18.1754	17.8627	18.4031	18.3319
	0.251293	-0.154718	P26373	RL13_HUMAN	RPL13	Large ribosomal subunit protein eL13	29.6401	29.9379	29.7646	29.9309	29.1792	29.7684
	0.983688	-0.160734	Q9H0U3	MAGT1_HUMAN	MAGT1	Magnesium transporter protein 1	19.6833	19.5953	19.6766	19.4997	19.3636	19.6097
	0.454937	-0.16109	O00159;O00159-2;O00159-3	MYO1C_HUMAN	MYO1C	Unconventional myosin-Ic	25.8234	25.5051	25.4821	25.6285	25.2626	25.4361
	0.380752	-0.161263	P08729	K2C7_HUMAN	KRT7	Keratin, type II cytoskeletal 7	23.5462	23.3366	22.9942	23.2517	22.9903	23.1513
	0.0473666	-0.161436	Q9H307	PININ_HUMAN	PNN	Pinin	16.7833	18.995	15.6546	17.5535	15.7203	17.6749
	0.0924701	-0.16241	Q8WXR4;Q8WXR4-2;Q8WXR4-3;Q8WXR4-4;Q8WXR4-5;Q8WXR4-6;Q8WXR4-7	MYO3B_HUMAN	MYO3B	Myosin-IIIb	20.7359	19.9514	19.7457	20.6062	18.8876	20.452
	0.4686	-0.162448	Q9P2E9	RRBP1_HUMAN	RRBP1	Ribosome-binding protein 1	20.1863	19.9509	20.161	19.7755	20.1947	19.8407
	0.164356	-0.163422	O60573	IF4E2_HUMAN	EIF4E2	Eukaryotic translation initiation factor 4E type 2	19.3791	19.504	19.78	19.4451	18.7507	19.977
	0.361807	-0.168125	Q5TEC6	H37_HUMAN	H3-7	Histone H3-7	29.6507	29.7944	29.5395	29.7607	29.1528	29.5667
	0.296741	-0.170161	Q5BKY9;Q5BKY9-2	F133B_HUMAN	FAM133B	Protein FAM133B	22.9724	22.446	22.2007	22.4524	22.3693	22.287
	0.494667	-0.170764	P62847;P62847-2;P62847-3;P62847-4	RS24_HUMAN	RPS24	Small ribosomal subunit protein eS24	29.0615	29.4125	29.561	29.2255	29.1649	29.1323
	0.374434	-0.171205	Q86UP2;Q86UP2-2;Q86UP2-4	KTN1_HUMAN	KTN1	Kinectin	20.446	20.1339	20.36	19.9306	20.473	20.0226
	0.494092	-0.174739	Q6Y7W6;Q6Y7W6-3;Q6Y7W6-4;Q6Y7W6-5	GGYF2_HUMAN	GIGYF2	GRB10-interacting GYF protein 2	19.8909	19.5308	19.9463	19.5761	19.773	19.4947
	0.0533655	-0.178901	P07951-2	TPM2_HUMAN	TPM2	Isoform of P07951, Isoform 2 of Tropomyosin beta chain	24.234	21.148	20.9708	21.6059	22.8463	21.3639
	0.0544663	-0.180152	P20674	COX5A_HUMAN	COX5A	Cytochrome c oxidase subunit 5A, mitochondrial	18.2006	18.0859	18.1266	18.1227	19.8442	15.9058
	0.359275	-0.182954	P68431	H31_HUMAN	H3C12	Histone H3.1	24.4172	24.9167	25.0961	24.7499	24.5685	24.5626
	0.126873	-0.184508	P13984	T2FB_HUMAN	GTF2F2	General transcription factor IIF subunit 2	19.5461	18.9699	18.6009	18.2065	19.7357	18.6212
	0.452623	-0.186887	Q9NYL2	M3K20_HUMAN	MAP3K20	Mitogen-activated protein kinase kinase kinase 20	20.9989	21.3081	20.7335	20.954	20.7689	20.757
	0.485678	-0.193771	P68133	ACTS_HUMAN	ACTA1	Actin, alpha skeletal muscle	30.2323	29.7004	29.8575	29.8572	29.7449	29.6068
	0.274674	-0.195552	Q5SSJ5	HP1B3_HUMAN	HP1BP3	Heterochromatin protein 1-binding protein 3	21.0701	21.5258	21.2785	21.383	20.5904	21.3144
	1.41183	-0.19637	Q13610	PWP1_HUMAN	PWP1	Periodic tryptophan protein 1 homolog	24.0302	23.893	23.8841	23.7403	23.6623	23.8156
	0.293218	-0.196543	Q9UBI6	GBG12_HUMAN	GNG12	Guanine nucleotide-binding protein G(I)/G(S)/G(O) subunit gamma-12	26.1538	25.4561	25.34	25.6175	25.4554	25.2874
	0.628842	-0.199148	Q15149-3	PLEC_HUMAN	PLEC	Isoform of Q15149, Isoform 3 of Plectin	20.9196	21.3154	21.245	21.0919	20.8359	20.9548
	0.168315	-0.20013	Q9Y4I1;Q9Y4I1-3;Q9Y4I1-2	MYO5A_HUMAN	MYO5A	Unconventional myosin-Va	23.9245	22.9867	22.4238	23.0712	22.7303	22.9331
	0.208131	-0.201017	Q8TCT9;Q8TCT9-5	HM13_HUMAN	HM13	Minor histocompatibility antigen H13	20.4964	19.385	19.7591	19.3496	19.9777	19.7102
	1.03457	-0.201665	P46013	KI67_HUMAN	MKI67	Proliferation marker protein Ki-67	20.1141	20.288	20.0911	19.8631	20.0906	19.9345
	0.446005	-0.201874	Q9UII4	HERC5_HUMAN	HERC5	E3 ISG15--protein ligase HERC5	21.3867	21.3923	21.7282	21.4796	20.9845	21.4373
	0.175272	-0.201998	Q15392;Q15392-2	DHC24_HUMAN	DHCR24	Delta(24)-sterol reductase	22.8062	21.9452	21.8645	21.4143	22.4985	22.097
	0.0340548	-0.202032	Q9NXF1;Q9NXF1-2	TEX10_HUMAN	TEX10	Testis-expressed protein 10	15.561	20.2791	20.5261	20.0072	16.2284	19.5245
	0.146573	-0.202083	P78406	RAE1L_HUMAN	RAE1	mRNA export factor RAE1	17.5298	17.7379	17.2931	16.7796	16.8654	18.3095
	0.42807	-0.202253	P38159	RBMX_HUMAN	RBMX	RNA-binding motif protein, X chromosome	24.0777	24.1115	24.6592	24.044	24.2202	23.9774
	1.23095	-0.203005	Q9UBM7	DHCR7_HUMAN	DHCR7	7-dehydrocholesterol reductase	19.9179	20.0206	19.7691	19.6933	19.6582	19.7471
	0.186896	-0.207817	P63244	RACK1_HUMAN	RACK1	Small ribosomal subunit protein RACK1	28.2249	29.3451	29.4936	29.096	28.6909	28.6533
	0.464921	-0.208366	Q9UNQ0;Q9UNQ0-2	ABCG2_HUMAN	ABCG2	Broad substrate specificity ATP-binding cassette transporter ABCG2	21.5013	20.8648	21.0461	20.9951	20.8527	20.9392
	0.64725	-0.209152	Q6ZUT1;Q6ZUT1-2;Q6ZUT1-3	NKAP1_HUMAN	NKAPD1	Uncharacterized protein NKAPD1	20.5138	20.4747	20.1494	20.0538	20.3457	20.111
	0.997229	-0.217653	Q14137	BOP1_HUMAN	BOP1	Ribosome biogenesis protein BOP1	19.1723	18.9985	19.0349	18.6823	18.9766	18.8939
	0.295624	-0.218004	Q9BW60;Q9BW60-2	ELOV1_HUMAN	ELOVL1	Elongation of very long chain fatty acids protein 1	21.4103	20.5724	20.5858	20.7004	20.7939	20.4203
	0.552318	-0.220033	Q96G23	CERS2_HUMAN	CERS2	Ceramide synthase 2	21.3681	20.9925	20.8779	20.7839	21.05	20.7446
	1.15223	-0.223218	Q99848	EBP2_HUMAN	EBNA1BP2	Probable rRNA-processing protein EBP2	22.5229	22.3874	22.2822	22.2593	22.2019	22.0616
	0.807618	-0.230349	Q86TG7-4	PEG10_HUMAN	PEG10	Isoform of Q86TG7, Isoform 4 of Retrotransposon-derived protein PEG10	21.3492	21.6224	21.6406	21.1478	21.4675	21.3058
	0.0912526	-0.231773	P67936	TPM4_HUMAN	TPM4	Tropomyosin alpha-4 chain	23.8576	21.3252	21.6304	21.8165	22.8637	21.4377
	0.23998	-0.231798	E9PMJ9	E9PMJ9_HUMAN	DENND2B	Isoform of P78524, DENN domain containing 2B (Fragment)	22.4085	23.017	22.9477	22.9049	21.9026	22.8704
	0.48819	-0.232012	Q8WU90	ZC3HF_HUMAN	ZC3H15	Zinc finger CCCH domain-containing protein 15	20.3755	20.6379	20.7069	20.0997	20.2297	20.6948
	0.950637	-0.233566	Q8TCJ2	STT3B_HUMAN	STT3B	Dolichyl-diphosphooligosaccharide--protein glycosyltransferase subunit STT3B	19.3084	18.965	19.0052	18.8567	18.927	18.7942
	0.615779	-0.236095	Q06787-8;Q06787-9	FMR1_HUMAN	FMR1	Isoform of Q06787, Isoform 8 of Fragile X messenger ribonucleoprotein 1	20.7331	20.7899	21.243	20.6686	20.7977	20.5913
	0.408533	-0.237689	Q9P035	HACD3_HUMAN	HACD3	Very-long-chain (3R)-3-hydroxyacyl-CoA dehydratase 3	21.488	20.8595	20.8087	20.7242	21.043	20.6758
	0.0501487	-0.238496	O00231;O00231-2	PSD11_HUMAN	PSMD11	26S proteasome non-ATPase regulatory subunit 11	16.3965	17.3644	17.6649	15.5586	20.0666	15.0851
	0.524273	-0.241388	Q96N66;Q96N66-2;Q96N66-3	MBOA7_HUMAN	MBOAT7	Lysophospholipid acyltransferase 7	19.4759	18.978	18.8847	18.7472	19.0354	18.832
	0.347289	-0.247529	Q13155;Q13155-2	AIMP2_HUMAN	AIMP2	Aminoacyl tRNA synthase complex-interacting multifunctional protein 2	19.666	19.3678	19.1273	19.4912	19.2745	18.6529
	0.968113	-0.248488	P42696	RBM34_HUMAN	RBM34	RNA-binding protein 34	19.6284	19.6695	19.4035	19.1901	19.2806	19.4853
	0.297778	-0.248508	P08582	TRFM_HUMAN	MELTF	Melanotransferrin	20.843	20.065	20.1327	20.5574	19.8521	19.8856
	0.372868	-0.250027	P14384	CBPM_HUMAN	CPM	Carboxypeptidase M	19.7262	19.1464	18.9369	19.1328	18.7184	19.2083
	0.99288	-0.251287	P11233	RALA_HUMAN	RALA	Ras-related protein Ral-A	20.6051	20.642	20.5901	20.5877	20.1927	20.3029
	1.47002	-0.252743	A0A994J7P9	A0A994J7P9_HUMAN	FXR2	Isoform of P51116, FMR1 autosomal homolog 2	23.0412	23.1299	23.1073	22.8139	22.9814	22.7249
	2.03963	-0.253417	Q8N9Q2	SR1IP_HUMAN	SREK1IP1	Protein SREK1IP1	22.7205	22.7008	22.7745	22.5763	22.4276	22.4317
	0.81393	-0.255652	Q53HL2	BOREA_HUMAN	CDCA8	Borealin	19.0738	18.7442	18.819	18.5591	18.83	18.481
	0.224211	-0.257195	Q2TBE0;Q2TBE0-2;Q2TBE0-3	C19L2_HUMAN	CWF19L2	CWF19-like protein 2	19.4534	18.6716	18.4237	18.0469	18.5645	19.1659
	0.464179	-0.260056	P84243	H33_HUMAN	H3-3B	Histone H3.3	22.1179	21.8669	22.0353	21.3287	21.7864	22.1248
	1.54155	-0.260423	P16104	H2AX_HUMAN	H2AX	Histone H2AX	30.0824	29.8892	30.1022	29.6995	29.7619	29.8313
	0.426594	-0.261271	P0DP23;P0DP24;P0DP25	CALM1_HUMAN;CALM2_HUMAN;CALM3_HUMAN	CALM1;CALM2;CALM3	Calmodulin-1	28.3786	27.7144	27.5498	27.7482	27.5755	27.5354
	0.341055	-0.262566	Q96HV5	TM41A_HUMAN	TMEM41A	Transmembrane protein 41A	18.5133	17.6902	17.8422	17.3739	18.0113	17.8728
	0.752531	-0.265483	Q9NS39	RED2_HUMAN	ADARB2	Double-stranded RNA-specific editase B2	17.4284	17.485	17.5085	17.086	17.013	17.5264
	0.132952	-0.265616	Q13162	PRDX4_HUMAN	PRDX4	Peroxiredoxin-4	22.4633	21.1969	19.9503	20.7413	20.9122	21.1603
	1.26169	-0.266065	Q9P003	CNIH4_HUMAN	CNIH4	Protein cornichon homolog 4	21.4116	21.3491	21.4323	21.2791	21.1636	20.9521
	1.20668	-0.266311	Q5JSZ5	PRC2B_HUMAN	PRRC2B	Protein PRRC2B	20.6538	20.5492	20.6867	20.5303	20.201	20.3596
	0.385281	-0.267845	P18621;P18621-3	RL17_HUMAN	RPL17	Large ribosomal subunit protein uL22	29.938	30.3259	30.1791	30.1974	29.343	30.099
	0.37895	-0.268189	Q66PJ3-2	AR6P4_HUMAN	ARL6IP4	Isoform of Q66PJ3, Isoform 2 of ADP-ribosylation factor-like protein 6-interacting protein 4	25.0323	24.3311	24.0556	24.1585	24.1291	24.3269
	0.260643	-0.273692	P35580-2	MYH10_HUMAN	MYH10	Isoform of P35580, Isoform 2 of Myosin-10	24.5532	23.3528	23.2805	23.5857	23.3519	23.4278
	0.16136	-0.275466	P37198	NUP62_HUMAN	NUP62	Nuclear pore glycoprotein p62	20.1051	18.6279	17.9728	18.7351	18.7512	18.3931
	0.233824	-0.276449	Q96HE9	PRR11_HUMAN	PRR11	Proline-rich protein 11	16.9721	17.5837	18.1316	17.3097	16.7174	17.8311
	1.72615	-0.27686	P57088	TMM33_HUMAN	TMEM33	Transmembrane protein 33	22.3886	22.2424	22.1467	21.9537	22.014	21.9796
	0.422251	-0.278006	O43823	AKAP8_HUMAN	AKAP8	A-kinase anchor protein 8	18.958	18.8305	18.3707	18.5392	18.0269	18.7591
	0.0914469	-0.278883	O14975;O14975-2	S27A2_HUMAN	SLC27A2	Long-chain fatty acid transport protein 2	18.0109	17.5177	17.4176	15.2979	18.8774	17.9343
	0.301859	-0.279888	Q9UNI6	DUS12_HUMAN	DUSP12	Dual specificity protein phosphatase 12	17.7855	18.733	18.8467	18.5131	17.9709	18.0416
	0.260251	-0.290356	P13987;P13987-2	CD59_HUMAN	CD59	CD59 glycoprotein	26.1128	25.1895	24.8481	25.54	24.7481	24.9912
	0.417069	-0.297417	Q8NDV7-6	TNR6A_HUMAN	TNRC6A	Isoform of Q8NDV7, Isoform 6 of Trinucleotide repeat-containing gene 6A protein	20.2492	19.5048	19.2365	19.3466	19.3436	19.4081
	0.258499	-0.299006	P05387	RLA2_HUMAN	RPLP2	Large ribosomal subunit protein P2	30.5593	30.9245	30.8479	30.9373	29.5848	30.9125
	0.52421	-0.301079	P10412	H14_HUMAN	H1-4	Histone H1.4	27.8155	28.3042	28.1938	28.0773	27.403	27.9299
	0.838604	-0.303216	P42166	LAP2A_HUMAN	TMPO	Lamina-associated polypeptide 2, isoform alpha	24.9731	24.4522	24.7728	24.4992	24.5032	24.2861
	0.109498	-0.307549	P56192	SYMC_HUMAN	MARS1	Methionine--tRNA ligase, cytoplasmic	19.5291	18.4069	19.8216	18.238	20.769	17.8279
	1.00582	-0.313018	Q99567	NUP88_HUMAN	NUP88	Nuclear pore complex protein Nup88	19.0237	19.0263	18.6405	18.7214	18.5371	18.4929
	0.352206	-0.318546	Q96D46	NMD3_HUMAN	NMD3	60S ribosomal export protein NMD3	20.7092	21.6752	21.5733	21.2129	20.5655	21.2237
	0.309955	-0.321404	O00161	SNP23_HUMAN	SNAP23	Synaptosomal-associated protein 23	20.2875	19.2943	19.1285	19.6648	19.1607	18.9205
	0.220876	-0.323955	P05187	PPB1_HUMAN	ALPP	Alkaline phosphatase, placental type	21.0877	20.8877	20.2355	21.041	19.4013	20.7967
	0.417791	-0.324342	Q9NZ01	TECR_HUMAN	TECR	Very-long-chain enoyl-CoA reductase	24.0659	23.0453	23.2007	23.2011	23.2091	22.9285
	0.127391	-0.32956	P06753-2	TPM3_HUMAN	TPM3	Isoform of P06753, Isoform 2 of Tropomyosin alpha-3 chain	26.7417	24.0221	24.106	24.422	25.2551	24.2041
	0.399259	-0.335656	P08174;P08174-2;P08174-3;P08174-4;P08174-5;P08174-6;P08174-7	DAF_HUMAN	CD55	Complement decay-accelerating factor	26.3287	25.5029	25.3204	25.6248	25.0444	25.4758
	0.503833	-0.340116	P50402	EMD_HUMAN	EMD	Emerin	22.4314	21.7302	21.4926	21.68	21.5742	21.3797
	0.777272	-0.341428	Q8TA86	RP9_HUMAN	RP9	Retinitis pigmentosa 9 protein	21.8473	21.5709	21.2548	21.3812	21.0126	21.2549
	0.930816	-0.342323	Q8WWQ0	PHIP_HUMAN	PHIP	PH-interacting protein	20.1002	19.5347	19.7053	19.4363	19.5056	19.3712
	0.140758	-0.342957	P35269	T2FA_HUMAN	GTF2F1	General transcription factor IIF subunit 1	19.3683	19.0977	18.5576	16.9897	19.9111	19.0938
	1.19108	-0.34387	P48651	PTSS1_HUMAN	PTDSS1	Phosphatidylserine synthase 1	21.8487	21.9128	22.0421	21.7505	21.3483	21.6732
	0.935767	-0.351254	Q9HAN9	NMNA1_HUMAN	NMNAT1	Nicotinamide/nicotinic acid mononucleotide adenylyltransferase 1	22.2128	22.0327	21.6536	21.7188	21.5097	21.6169
	0.444232	-0.353968	Q9Y3U8	RL36_HUMAN	RPL36	Large ribosomal subunit protein eL36	29.2383	29.3659	29.1531	29.2895	28.2281	29.1776
	1.42159	-0.36849	P11388;P11388-2;P11388-3;P11388-4	TOP2A_HUMAN	TOP2A	DNA topoisomerase 2-alpha	23.5271	23.2251	23.1439	22.9923	22.9026	22.8957
	1.8953	-0.374787	P61619	S61A1_HUMAN	SEC61A1	Protein transport protein Sec61 subunit alpha isoform 1	22.1467	22.1421	22.1248	21.8999	21.6014	21.7878
	0.111692	-0.376138	P09038;P09038-1;P09038-2;P09038-3	FGF2_HUMAN	FGF2	Fibroblast growth factor 2	16.7232	16.9032	19.0613	19.0454	16.6816	15.8323
	0.226575	-0.37723	Q96EY7	PTCD3_HUMAN	PTCD3	Small ribosomal subunit protein mS39	16.6246	17.7017	16.4223	16.2241	17.548	15.8448
	0.907667	-0.378302	P06899;P23527;P33778;Q16778	H2B1B_HUMAN;H2B1J_HUMAN;H2B1O_HUMAN;H2B2E_HUMAN	H2BC11;H2BC17;H2BC21;H2BC3	Histone H2B type 1-J	27.9723	27.7914	27.3556	27.4586	27.2481	27.2777
	0.350041	-0.378926	Q9Y2K2;Q9Y2K2-7;Q9Y2K2-8	SIK3_HUMAN	SIK3	Serine/threonine-protein kinase SIK3	16.071	17.2365	16.6812	16.2924	15.7639	16.7956
	0.382004	-0.387032	O15145	ARPC3_HUMAN	ARPC3	Actin-related protein 2/3 complex subunit 3	21.4828	20.6693	20.5161	21.0054	19.9601	20.5417
	0.413379	-0.391162	P62899	RL31_HUMAN	RPL31	Large ribosomal subunit protein eL31	30.3009	30.5342	30.4908	30.4808	29.2599	30.4116
	0.307871	-0.395667	P46778	RL21_HUMAN	RPL21	Large ribosomal subunit protein eL21	28.8065	29.2107	29.0945	29.2887	27.6352	29.0008
	0.313646	-0.396806	Q16637;Q16637-2;Q16637-3;Q16637-4	SMN_HUMAN	SMN2	Survival motor neuron protein	19.996	19.3939	18.9041	18.3212	19.7399	19.0425
	0.411984	-0.397662	P02768	ALBU_HUMAN	ALB	Albumin	31.2789	30.5108	29.8908	30.2279	29.995	30.2645
	0.641804	-0.39975	Q562R1	ACTBL_HUMAN	ACTBL2	Beta-actin-like protein 2	27.3548	27.3504	27.1427	27.265	26.3557	27.0279
	0.131644	-0.402409	P25311	ZA2G_HUMAN	AZGP1	Zinc-alpha-2-glycoprotein	19.0518	18.6059	18.0107	19.9535	16.2096	18.2981
	1.83015	-0.41243	Q9NQS7;Q9NQS7-2	INCE_HUMAN	INCENP	Inner centromere protein	19.362	19.2121	19.5314	18.9037	19.0341	18.9304
	0.218349	-0.416421	Q15388	TOM20_HUMAN	TOMM20	Mitochondrial import receptor subunit TOM20 homolog	20.2663	18.2887	18.0362	18.8835	18.0872	18.3713
	0.129207	-0.416785	Q9NX05	F120C_HUMAN	FAM120C	Constitutive coactivator of PPAR-gamma-like protein 2	17.5832	18.4968	18.9693	19.131	15.7106	18.9573
	0.101957	-0.417548	Q96EK4	THA11_HUMAN	THAP11	THAP domain-containing protein 11	15.2169	18.6804	18.6723	18.4837	17.4595	15.3737
	0.348202	-0.419022	P62314	SMD1_HUMAN	SNRPD1	Small nuclear ribonucleoprotein Sm D1	22.6396	22.908	23.1739	21.5385	22.9539	22.972
	0.286636	-0.41925	P62987	RL40_HUMAN	UBA52	Ubiquitin-ribosomal protein eL40 fusion protein	28.7489	28.8358	27.547	28.6331	27.1902	28.0507
	0.0885231	-0.422678	O00422;O00422-2	SAP18_HUMAN	SAP18	Histone deacetylase complex subunit SAP18	19.3445	15.3126	16.4735	18.8876	16.1808	14.7941
	1.08645	-0.422798	P17480;P17480-2	UBF1_HUMAN	UBTF	Nucleolar transcription factor 1	24.0582	23.6161	23.4573	23.3553	23.2485	23.2594
	0.487579	-0.428712	P35658;P35658-2;P35658-3;P35658-4	NU214_HUMAN	NUP214	Nuclear pore complex protein Nup214	20.2539	19.2654	19.0674	19.0035	19.3173	18.9798
	0.168318	-0.433546	Q14203;Q14203-2;Q14203-3;Q14203-4;Q14203-5;Q14203-6	DCTN1_HUMAN	DCTN1	Dynactin subunit 1	17.9545	17.6991	17.693	17.4644	18.965	15.6166
	0.197042	-0.438183	Q96A35	RM24_HUMAN	MRPL24	Large ribosomal subunit protein uL24m	17.5364	18.2644	18.377	18.4582	15.9947	18.4103
	0.92592	-0.448673	O14646;O14646-2	CHD1_HUMAN	CHD1	Chromodomain-helicase-DNA-binding protein 1	22.401	21.9266	21.7495	21.7245	21.3483	21.6583
	2.08214	-0.450312	Q02880;Q02880-2	TOP2B_HUMAN	TOP2B	DNA topoisomerase 2-beta	19.9206	19.8555	19.8911	19.5771	19.4712	19.2679
	1.03652	-0.458068	P46977	STT3A_HUMAN	STT3A	Dolichyl-diphosphooligosaccharide--protein glycosyltransferase subunit STT3A	20.9734	20.8991	20.6974	20.4368	20.7077	20.0512
	2.01138	-0.464678	Q68D10;Q68D10-2	SPT2_HUMAN	SPTY2D1	Protein SPT2 homolog	17.9707	17.9799	18.2037	17.6987	17.5883	17.4734
	0.449957	-0.47134	O43663;O43663-2;O43663-3;O43663-4	PRC1_HUMAN	PRC1	Protein regulator of cytokinesis 1	15.9285	17.1161	17.0717	16.0297	15.9823	16.6903
	0.78808	-0.474877	P42694	HELZ_HUMAN	HELZ	Probable helicase with zinc finger domain	20.8662	20.5985	20.2826	20.5106	19.7484	20.0638
	0.104756	-0.485478	P12268	IMDH2_HUMAN	IMPDH2	Inosine-5'-monophosphate dehydrogenase 2	19.7428	18.8646	19.1219	18.7614	21.6121	15.8994
	0.27515	-0.487551	O14950;P19105	ML12A_HUMAN;ML12B_HUMAN	MYL12A;MYL12B	Myosin regulatory light chain 12B	27.7559	25.8713	25.464	25.9915	25.9312	25.7059
	1.86955	-0.495469	Q8N884	CGAS_HUMAN	CGAS	Cyclic GMP-AMP synthase	22.1549	22.1148	21.977	21.7694	21.4078	21.5831
	0.43855	-0.506176	Q92614;Q92614-4	MY18A_HUMAN	MYO18A	Unconventional myosin-XVIIIa	21.5728	20.3358	19.9315	20.1175	20.0414	20.1628
	0.217064	-0.508003	P09493-3	TPM1_HUMAN	TPM1	Isoform of P09493, Isoform 3 of Tropomyosin alpha-1 chain	25.6865	23.1392	23.1863	23.3006	24.1725	23.0149
	0.235555	-0.517397	P14649	MYL6B_HUMAN	MYL6B	Myosin light chain 6B	28.4539	25.8582	25.88	26.1732	26.3273	26.1395
	0.520823	-0.525148	Q14134;Q14134-2	TRI29_HUMAN	TRIM29	Tripartite motif-containing protein 29	21.4399	20.0531	20.4206	19.8458	20.3841	20.1083
	0.179077	-0.528369	A0A8V8TNY3	A0A8V8TNY3_HUMAN	FAM120A	Isoform of Q9NZB2, Family with sequence similarity 120A	18.615	17.9928	18.4107	15.6216	19.184	18.6278
	0.523293	-0.532735	P00450	CERU_HUMAN	CP	Ceruloplasmin	25.964	24.9343	24.5291	24.7289	24.3428	24.7576
	0.762042	-0.555829	O00560;O00560-3	SDCB1_HUMAN	SDCBP	Syntenin-1	20.0092	20.1716	20.8845	19.9352	20.0586	19.404
	1.00631	-0.557013	O75531	BAF_HUMAN	BANF1	Barrier-to-autointegration factor	29.0752	28.2738	28.3899	28.163	27.9489	27.9559
	0.527355	-0.558926	P61160	ARP2_HUMAN	ACTR2	Actin-related protein 2	21.9245	21.0393	21.2441	20.4787	21.6076	20.4449
	0.215837	-0.566426	Q15014	MO4L2_HUMAN	MORF4L2	Mortality factor 4-like protein 2	18.4206	16.4441	16.8431	15.168	16.8375	18.0031
	0.481596	-0.573744	Q9BQB6;Q9BQB6-2;Q9BQB6-3	VKOR1_HUMAN	VKORC1	Vitamin K epoxide reductase complex subunit 1	20.9651	20.4413	20.5431	20.5745	19.0916	20.5621
	1.39647	-0.581964	Q15629;Q15629-2	TRAM1_HUMAN	TRAM1	Translocating chain-associated membrane protein 1	20.8408	20.3604	20.2508	19.9439	19.7651	19.9971
	0.644609	-0.587696	Q71DI3	H32_HUMAN	H3C13	Histone H3.2	23.1765	22.6052	21.8978	21.9068	21.6963	22.3133
	1.24137	-0.609042	P25440;P25440-2	BRD2_HUMAN	BRD2	Bromodomain-containing protein 2	20.9611	20.7957	20.2523	20.1609	19.8916	20.1295
	0.614233	-0.621555	Q6PGP7	SKI3_HUMAN	SKIC3	Superkiller complex protein 3	24.6712	23.7552	24.9076	24.3666	23.3866	23.7161
	0.412677	-0.632834	Q9Y646	CBPQ_HUMAN	CPQ	Carboxypeptidase Q	20.94	20.2453	19.5564	19.9814	18.597	20.2648
	0.374703	-0.645948	P35579	MYH9_HUMAN	MYH9	Myosin-9	27.8495	25.7082	25.7064	25.8668	25.9062	25.5533
	0.607136	-0.64854	Q9UNN8	EPCR_HUMAN	PROCR	Endothelial protein C receptor	22.3953	21.7026	21.5044	21.8817	20.5137	21.2613
	1.08661	-0.650139	P49916;P49916-2;P49916-3;P49916-4	DNLI3_HUMAN	LIG3	DNA ligase 3	19.0846	18.2414	18.3769	17.8859	18.111	17.7556
	0.706276	-0.650672	Q9NUD5	ZCHC3_HUMAN	ZCCHC3	Zinc finger CCHC domain-containing protein 3	21.2054	20.7297	19.8953	20.2703	19.6693	19.9388
	0.700862	-0.673893	Q92685	ALG3_HUMAN	ALG3	Dol-P-Man:Man(5)GlcNAc(2)-PP-Dol alpha-1,3-mannosyltransferase	19.7731	18.7486	18.5288	18.7481	18.0279	18.2527
	0.392865	-0.690425	Q53TN4;Q53TN4-3	CYBR1_HUMAN	CYBRD1	Plasma membrane ascorbate-dependent reductase CYBRD1	19.185	18.2724	16.9798	17.9509	16.7185	17.6964
	0.645232	-0.720131	P11498	PYC_HUMAN	PC	Pyruvate carboxylase, mitochondrial	22.1006	21.3586	20.7388	20.4734	21.2977	20.2666
	0.301983	-0.72859	Q96D70	R3HD4_HUMAN	R3HDM4	R3H domain-containing protein 4	19.3083	20.5141	20.3934	20.3168	17.5393	20.1738
	1.54587	-0.749452	Q96RQ3	MCCA_HUMAN	MCCC1	Methylcrotonoyl-CoA carboxylase subunit alpha, mitochondrial	20.6091	20.3965	19.8713	19.5807	19.4573	19.5905
	0.252853	-0.761724	Q13547;Q92769;Q92769-3	HDAC1_HUMAN;HDAC2_HUMAN	HDAC1;HDAC2	Histone deacetylase 1	18.6416	18.6272	18.7529	15.6891	19.7829	18.2644
	0.26021	-0.761749	O75643	U520_HUMAN	SNRNP200	U5 small nuclear ribonucleoprotein 200 kDa helicase	18.4364	18.4664	18.7072	15.4638	19.1588	18.7021
	0.241953	-0.767644	Q99943	PLCA_HUMAN	AGPAT1	1-acyl-sn-glycerol-3-phosphate acyltransferase alpha	18.3144	18.3644	18.7521	15.2216	18.9932	18.9131
	0.14817	-0.775903	O00203;O00203-3	AP3B1_HUMAN	AP3B1	AP-3 complex subunit beta-1	19.5026	18.1326	15.6133	16.6025	19.8803	14.438
	0.388599	-0.805907	Q9Y3E0	GOT1B_HUMAN	GOLT1B	Vesicle transport protein GOT1B	19.2351	18.1839	18.5429	18.5325	16.2193	18.7924
	0.178282	-0.846118	P05114	HMGN1_HUMAN	HMGN1	Non-histone chromosomal protein HMG-14	20.4565	20.2461	19.347	15.6349	20.7631	21.1133
	0.543524	-0.864604	Q9NV06	DCA13_HUMAN	DCAF13	DDB1- and CUL4-associated factor 13	19.5034	20.0674	19.3961	19.6126	17.4605	19.3
	0.220076	-0.91991	Q96MD7-1	CI085_HUMAN	C9orf85	Isoform of Q96MD7, Isoform 2 of Uncharacterized protein C9orf85	17.2807	19.3212	19.5643	19.1169	19.4014	14.8881
	0.861324	-1.03718	Q96MU7;Q96MU7-2	YTDC1_HUMAN	YTHDC1	YTH domain-containing protein 1	19.1708	19.0766	19.1307	18.8254	16.9916	18.4497
	0.568863	-1.07753	Q9GZV3	SC5A7_HUMAN	SLC5A7	High affinity choline transporter 1	20.1946	19.9644	18.9991	19.6844	17.1668	19.0742
	0.535661	-1.08312	Q9Y2Q9	RT28_HUMAN	MRPS28	Small ribosomal subunit protein bS1m	17.0626	17.3203	18.0777	14.9657	16.377	17.8685
	0.35811	-1.0867	Q9UMY1	NOL7_HUMAN	NOL7	Nucleolar protein 7	20.4049	21.354	21.9652	21.4056	17.7967	21.2617
	0.384528	-1.11332	Q5VSY0;Q5VSY0-2	GKAP1_HUMAN	GKAP1	G kinase-anchoring protein 1	19.265	18.1812	16.833	15.1117	18.5071	17.3203
	0.235438	-1.13488	O75494;O75494-2;O75494-3;O75494-4;O75494-5;O75494-6	SRS10_HUMAN	SRSF10	Serine/arginine-rich splicing factor 10	21.4613	21.4847	21.4333	22.3085	16.5365	22.1297
	0.554249	-1.14257	Q9Y4W6	AFG32_HUMAN	AFG3L2	AFG3-like protein 2	17.8238	16.171	17.0557	14.4186	17.0807	16.1235
	0.859148	-1.20576	Q13085;Q13085-4	ACACA_HUMAN	ACACA	Acetyl-CoA carboxylase 1	26.5894	25.452	24.4946	24.7733	24.1901	23.9553
	0.676726	-1.22318	O00488	ZN593_HUMAN	ZNF593	Zinc finger protein 593	17.9102	19.0363	18.5256	15.7795	17.8027	18.2203
	0.337858	-1.25972	P10155;P10155-3;P10155-4;P10155-5	RO60_HUMAN	RO60	RNA-binding protein RO60	18.0989	19.1074	18.9822	18.8566	14.4585	19.0942
	0.429899	-1.3844	Q9NXE8	CWC25_HUMAN	CWC25	Pre-mRNA-splicing factor CWC25 homolog	20.919	19.9045	19.5936	20.1232	16.12	20.0207
	1.12687	-1.56481	Q8WUQ7;Q8WUQ7-2	CATIN_HUMAN	CACTIN	Splicing factor Cactin	17.2872	17.4475	16.3187	14.4159	15.6556	16.2875
	0.711245	-1.62861	B7ZAQ6;B7ZAQ6-2;B7ZAQ6-3;P0CG08	GPHRA_HUMAN;GPHRB_HUMAN	GPR89A;GPR89B	Golgi pH regulator A	17.6489	18.3034	18.3418	18.5038	15.291	15.6135
	0.49194	-1.66044	Q9BRU9	UTP23_HUMAN	UTP23	rRNA-processing protein UTP23 homolog	21.1217	21.1778	21.1813	20.9346	16.558	21.0068
	0.59613	-1.75392	P33947	ERD22_HUMAN	KDELR2	ER lumen protein-retaining receptor 2	18.8539	17.6319	16.9407	13.6769	17.3669	17.121
	0.512877	-1.76604	H7BY16	H7BY16_HUMAN	NCL	Isoform of P19338, Nucleolin	15.2124	18.7854	19.1609	14.5922	17.4688	15.7996
	0.512977	-1.79076	D6RF23	D6RF23_HUMAN	RACK1	Isoform of P63244, Receptor for activated C kinase 1	19.5029	20.0585	19.454	19.7041	14.8669	19.0722
	0.446033	-1.97827	P04908;P0C0S8;P20671;Q7L7L0;Q93077;Q96KK5;Q99878;Q9BTM1	H2A1B_HUMAN;H2A1C_HUMAN;H2A1D_HUMAN;H2A1H_HUMAN;H2A1J_HUMAN;H2A1_HUMAN;H2A3_HUMAN;H2AJ_HUMAN	H2AC12;H2AC14;H2AC17;H2AC25;H2AC6;H2AC7;H2AC8;H2AJ	Histone H2A type 1-B/E	28.8832	28.9062	29.0854	28.776	23.171	28.9931
	0.280862	-2.09552	P05976;P05976-2;P08590	MYL1_HUMAN;MYL3_HUMAN	MYL1;MYL3	Myosin light chain 1/3, skeletal muscle isoform	22.6864	15.1664	21.8432	15.4021	21.4039	16.6034
	0.345591	-2.20937	Q58FF8	H90B2_HUMAN	HSP90AB2P	Putative heat shock protein HSP 90-beta 2	22.2384	21.433	21.1266	16.9176	24.6441	16.6081
	0.621328	-2.32336	Q9Y5M8	SRPRB_HUMAN	SRPRB	Signal recognition particle receptor subunit beta	18.1666	18.7797	18.7254	14.4784	19.5719	14.6513
	0.643857	-2.39259	Q8NC56	LEMD2_HUMAN	LEMD2	LEM domain-containing protein 2	21.0676	20.6511	21.0096	20.5952	19.7486	15.2068
	0.757893	-2.43554	P15328	FOLR1_HUMAN	FOLR1	Folate receptor alpha	21.3206	20.4031	19.6965	20.8267	16.874	16.4128
	0.908801	-4.10669	Q9Y3B7	RM11_HUMAN	MRPL11	Large ribosomal subunit protein uL11m	21.087	21.7444	21.9919	15.4483	15.3705	21.6844
	0.918477	-4.11534	O00763-3;O00763;O00763-2	ACACB_HUMAN	ACACB	Acetyl-CoA carboxylase 2	22.148	21.1141	20.1945	13.4807	17.1723	20.4575
	0.564627	-4.87275	Q8NEY8;Q8NEY8-2;Q8NEY8-8;Q8NEY8-9	PPHLN_HUMAN	PPHLN1	Periphilin-1	27.0206	27.4781	26.9999	14.6343	26.1248	26.1213

## Sheet: acGlycine_Proline
Significant	LOG(-10 of p-vlaue)	Difference	Protein.Group	Protein.Names	Genes	First.Protein.Description	Symbol color	Symbol type	Symbol size	Show label	Lyn_acG_1.raw	Lyn_acG_2.raw	Lyn_acG_3.raw	Lyn_P_1.raw	Lyn_P_2.raw	Lyn_P_3.raw
+	2.86898	6.95358	Q5QP82	DCA10_HUMAN	DCAF10	DDB1- and CUL4-associated factor 10	Color2 [DarkGray]	1	4		23.2474	22.9874	22.9012	15.2804	15.1686	17.8262
+	2.57543	0.727355	A0A8V8TMQ1	A0A8V8TMQ1_HUMAN	FXR1	Isoform of P51114, RNA-binding protein FXR1	Color2 [DarkGray]	1	4		20.5522	20.7216	20.471	19.9898	19.7105	19.8625
+	3.01565	0.971925	A0A994J7P9	A0A994J7P9_HUMAN	FXR2	Isoform of P51116, FMR1 autosomal homolog 2	Color2 [DarkGray]	1	4		22.8139	22.9814	22.7249	21.7807	21.7901	22.0336
+	1.61922	2.07404	B7ZAQ6;B7ZAQ6-2;B7ZAQ6-3;P0CG08	GPHRA_HUMAN;GPHRB_HUMAN	GPR89A;GPR89B	Golgi pH regulator A	Color2 [DarkGray]	1	4		18.5038	17.7643	16.5432	15.6912	15.6231	15.2748
+	1.63735	-1.36593	E7ERS3	E7ERS3_HUMAN	ZC3H18	Isoform of Q86VM9, Zinc finger CCCH-type containing 18	Color2 [DarkGray]	1	4		17.8637	18.1855	19.0339	19.5901	19.5592	20.0316
+	1.20684	2.29495	H3BUF6	H3BUF6_HUMAN	ATXN2L	Isoform of Q8WWM7, Ataxin 2 like	Color2 [DarkGray]	1	4		18.3554	17.9404	18.3361	14.9052	17.6761	15.1659
+	1.55993	-2.95968	H7BY16	H7BY16_HUMAN	NCL	Isoform of P19338, Nucleolin	Color2 [DarkGray]	1	4		15.5036	17.3785	14.6724	18.5492	18.3812	19.5031
+	2.32046	2.66205	H7BY36	H7BY36_HUMAN	EWSR1	Isoform of Q01844, EWS RNA binding protein 1 (Fragment)	Color2 [DarkGray]	1	4		20.0552	19.0473	19.925	17.08	16.3823	17.5792
+	2.76045	0.966646	O00571;O00571-2	DDX3X_HUMAN	DDX3X	ATP-dependent RNA helicase DDX3X	Color2 [DarkGray]	1	4		22.2237	22.5906	22.4802	21.605	21.3753	21.4142
+	1.75843	-0.756053	O14744;O14744-5	ANM5_HUMAN	PRMT5	Protein arginine N-methyltransferase 5	Color2 [DarkGray]	1	4		20.7633	21.1999	21.0914	21.5493	21.7359	22.0374
+	1.56071	-1.7262	O14950;P19105	ML12A_HUMAN;ML12B_HUMAN	MYL12A;MYL12B	Myosin regulatory light chain 12B	Color2 [DarkGray]	1	4		25.9915	25.9312	25.7059	28.1088	28.099	26.5993
+	2.61855	1.02843	O14974;O14974-2;O14974-5	MYPT1_HUMAN	PPP1R12A	Protein phosphatase 1 regulatory subunit 12A	Color2 [DarkGray]	1	4		21.0893	21.3137	20.8589	20.0936	19.9172	20.1659
+	2.11541	-3.65106	O43719	HTSF1_HUMAN	HTATSF1	HIV Tat-specific factor 1	Color2 [DarkGray]	1	4		16.5079	16.4472	14.8094	19.4173	18.829	20.4713
+	2.19839	0.714636	O43809	CPSF5_HUMAN	NUDT21	Cleavage and polyadenylation specificity factor subunit 5	Color2 [DarkGray]	1	4		20.7017	20.7496	21.086	20.1505	20.0137	20.2292
+	2.50225	0.673139	O60264	SMCA5_HUMAN	SMARCA5	SWI/SNF-related matrix-associated actin-dependent regulator of chromatin subfamily A member 5	Color2 [DarkGray]	1	4		20.6047	20.4183	20.6305	19.7618	19.8355	20.0368
+	2.30963	0.51525	O60524;O60524-3;O60524-4;O60524-5	NEMF_HUMAN	NEMF	Ribosome quality control complex subunit NEMF	Color2 [DarkGray]	1	4		20.4046	20.5779	20.2837	19.8621	19.8871	19.9713
+	3.21615	0.831157	O60762	DPM1_HUMAN	DPM1	Dolichol-phosphate mannosyltransferase subunit 1	Color2 [DarkGray]	1	4		21.1244	21.1383	21.1616	20.2226	20.2298	20.4785
+	2.91894	1.65225	O75165	DJC13_HUMAN	DNAJC13	DnaJ homolog subfamily C member 13	Color2 [DarkGray]	1	4		20.3936	20.6164	20.4112	18.5272	18.7649	19.1724
+	2.50719	0.390083	O75367;O75367-1;O75367-3	H2AY_HUMAN	MACROH2A1	Core histone macro-H2A.1	Color2 [DarkGray]	1	4		24.1924	24.3317	24.3809	23.9121	23.8704	23.9523
+	1.40626	1.04535	O75531	BAF_HUMAN	BANF1	Barrier-to-autointegration factor	Color2 [DarkGray]	1	4		28.163	27.9489	27.9559	27.1589	27.4524	26.3204
+	1.58932	1.05646	O94874	UFL1_HUMAN	UFL1	E3 UFM1-protein ligase 1	Color2 [DarkGray]	1	4		19.8611	19.8907	20.0249	18.4556	18.6973	19.4545
+	2.0212	-3.58569	O94915	FRYL_HUMAN	FRYL	Protein furry homolog-like	Color2 [DarkGray]	1	4		18.3304	15.7741	16.4638	20.2988	20.4446	20.5819
+	1.79676	-5.37502	O95302;O95302-3	FKBP9_HUMAN	FKBP9	Peptidyl-prolyl cis-trans isomerase FKBP9	Color2 [DarkGray]	1	4		14.8531	19.0926	15.4329	22.1587	21.8195	21.5255
+	3.0044	-0.766682	O95714	HERC2_HUMAN	HERC2	E3 ubiquitin-protein ligase HERC2	Color2 [DarkGray]	1	4		19.2518	19.3506	19.4696	20.2135	20.0034	20.1552
+	1.31143	3.1985	P00387;P00387-2;P00387-3	NB5R3_HUMAN	CYB5R3	NADH-cytochrome b5 reductase 3	Color2 [DarkGray]	1	4		19.0575	20.3686	18.3543	16.616	14.1598	17.409
+	1.47739	4.22808	P01040	CYTA_HUMAN	CSTA	Cystatin-A	Color2 [DarkGray]	1	4		23.1095	19.9637	19.3725	16.5011	17.7435	15.5169
+	1.31389	1.89627	P01116;P01116-2	RASK_HUMAN	KRAS	GTPase KRas	Color2 [DarkGray]	1	4		18.7879	19.1265	18.2751	16.8179	15.7521	17.9308
+	1.42178	1.76261	P02538	K2C6A_HUMAN	KRT6A	Keratin, type II cytoskeletal 6A	Color2 [DarkGray]	1	4		23.0863	23.4803	22.05	20.4374	21.7837	21.1076
+	1.22509	-5.06046	P05976;P05976-2;P08590	MYL1_HUMAN;MYL3_HUMAN	MYL1;MYL3	Myosin light chain 1/3, skeletal muscle isoform	Color2 [DarkGray]	1	4		15.5598	21.4039	15.8885	23.3334	22.7902	21.91
+	3.10998	0.810371	P06748	NPM_HUMAN	NPM1	Nucleophosmin	Color2 [DarkGray]	1	4		25.8776	26.0068	25.8009	25.0713	24.9804	25.2025
+	1.64707	1.76809	P08779	K1C16_HUMAN	KRT16	Keratin, type I cytoskeletal 16	Color2 [DarkGray]	1	4		24.7072	24.3512	23.2176	22.6641	21.9884	22.3192
+	1.70674	2.10412	P09661	RU2A_HUMAN	SNRPA1	U2 small nuclear ribonucleoprotein A'	Color2 [DarkGray]	1	4		18.4809	19.2248	18.6688	17.316	15.6733	17.0728
+	2.52507	0.665646	P09874	PARP1_HUMAN	PARP1	Poly [ADP-ribose] polymerase 1	Color2 [DarkGray]	1	4		23.2459	23.3406	23.3744	22.5489	22.569	22.8461
+	2.42826	1.08671	P0CG12	DERPC_HUMAN	DERPC	Decreased expression in renal and prostate cancer protein	Color2 [DarkGray]	1	4		19.7283	19.9975	19.5823	18.5542	18.5481	18.9457
+	1.76294	2.09008	P0CG38	POTEI_HUMAN	POTEI	POTE ankyrin domain family member I	Color2 [DarkGray]	1	4		21.5393	21.3879	21.1812	18.2628	20.0019	19.5736
+	1.76757	-0.805139	P0CG39	POTEJ_HUMAN	POTEJ	POTE ankyrin domain family member J	Color2 [DarkGray]	1	4		18.9199	19.0121	18.5725	19.9345	19.409	19.5765
+	2.62035	1.82421	P0DI83	NARR_HUMAN	RAB34	Isoform of Q9BZG1, Ras-related protein Rab-34, isoform NARR	Color2 [DarkGray]	1	4		18.2545	18.0461	18.8268	16.3589	16.7976	16.4983
+	1.95176	1.26274	P11233	RALA_HUMAN	RALA	Ras-related protein Ral-A	Color2 [DarkGray]	1	4		20.5877	20.1927	20.3029	18.9376	19.6027	18.7548
+	2.22011	2.87312	P11234;P11234-2;P11234-3	RALB_HUMAN	RALB	Ras-related protein Ral-B	Color2 [DarkGray]	1	4		18.48	18.3612	17.7308	15.332	14.4652	16.1554
+	1.74343	0.578147	P11387	TOP1_HUMAN	TOP1	DNA topoisomerase 1	Color2 [DarkGray]	1	4		22.0861	22.125	22.0945	21.3404	21.4118	21.819
+	2.98324	0.679866	P11388;P11388-2;P11388-3;P11388-4	TOP2A_HUMAN	TOP2A	DNA topoisomerase 2-alpha	Color2 [DarkGray]	1	4		22.9923	22.9026	22.8957	22.1711	22.1829	22.3971
+	1.70801	0.732878	P11940	PABP1_HUMAN	PABPC1	Polyadenylate-binding protein 1	Color2 [DarkGray]	1	4		24.6928	24.9646	24.6851	23.8315	23.9264	24.3861
+	2.69377	0.732734	P12235	ADT1_HUMAN	SLC25A4	ADP/ATP translocase 1	Color2 [DarkGray]	1	4		19.8579	19.7439	19.5308	19.0465	18.923	18.965
+	3.2576	5.37577	P12814;P12814-2;P12814-3;P12814-4	ACTN1_HUMAN	ACTN1	Alpha-actinin-1	Color2 [DarkGray]	1	4		19.9668	21.3907	20.1027	15.5526	15.1994	14.5808
+	2.08855	-1.78417	P14649	MYL6B_HUMAN	MYL6B	Myosin light chain 6B	Color2 [DarkGray]	1	4		26.1732	26.3273	26.1395	28.2251	28.477	27.2904
+	2.07508	0.438864	P16104	H2AX_HUMAN	H2AX	Histone H2AX	Color2 [DarkGray]	1	4		29.6995	29.7619	29.8313	29.1921	29.3082	29.4757
+	2.23844	0.917983	P17844	DDX5_HUMAN	DDX5	Probable ATP-dependent RNA helicase DDX5	Color2 [DarkGray]	1	4		24.3691	24.9581	24.6375	23.7614	23.721	23.7283
+	2.29114	-0.723486	P21127;P21127-2;P21127-3;P21127-8	CD11B_HUMAN	CDK11B	Cyclin-dependent kinase 11B	Color2 [DarkGray]	1	4		19.484	19.6777	19.4945	20.1709	20.1527	20.503
+	2.57634	1.72109	P23246	SFPQ_HUMAN	SFPQ	Splicing factor, proline- and glutamine-rich	Color2 [DarkGray]	1	4		22.7343	23.6031	23.1027	21.4304	21.32	21.5263
+	2.82151	-0.968207	P25440;P25440-2	BRD2_HUMAN	BRD2	Bromodomain-containing protein 2	Color2 [DarkGray]	1	4		20.1609	19.8916	20.1295	21.073	20.8522	21.1614
+	2.39354	1.27552	P26196	DDX6_HUMAN	DDX6	Probable ATP-dependent RNA helicase DDX6	Color2 [DarkGray]	1	4		20.5628	20.9299	20.5854	19.216	19.2611	19.7745
+	1.57538	2.71723	P29372;P29372-2;P29372-4;P29372-5	3MG_HUMAN	MPG	DNA-3-methyladenine glycosylase	Color2 [DarkGray]	1	4		17.2267	18.2132	18.4805	16.0366	15.8621	13.87
+	1.61347	1.33279	P35249	RFC4_HUMAN	RFC4	Replication factor C subunit 4	Color2 [DarkGray]	1	4		20.309	20.6494	20.2933	18.7833	18.669	19.8012
+	1.66896	1.17578	P35250	RFC2_HUMAN	RFC2	Replication factor C subunit 2	Color2 [DarkGray]	1	4		20.5074	20.7761	20.4185	19.0849	19.0942	19.9955
+	2.50283	1.36992	P35251;P35251-2	RFC1_HUMAN	RFC1	Replication factor C subunit 1	Color2 [DarkGray]	1	4		20.9046	20.8699	20.9658	19.4499	19.2291	19.9515
+	1.99095	-1.83263	P35579	MYH9_HUMAN	MYH9	Myosin-9	Color2 [DarkGray]	1	4		25.8668	25.9062	25.5533	27.9812	28.0039	26.839
+	2.3787	1.28678	P35637;P35637-2	FUS_HUMAN	FUS	RNA-binding protein FUS	Color2 [DarkGray]	1	4		23.8293	24.3025	24.5546	22.9095	23.0437	22.8729
+	1.8749	-0.714862	P35658;P35658-2;P35658-3;P35658-4	NU214_HUMAN	NUP214	Nuclear pore complex protein Nup214	Color2 [DarkGray]	1	4		19.0035	19.3173	18.9798	19.8055	20.0435	19.5963
+	1.96156	0.959991	P37108	SRP14_HUMAN	SRP14	Signal recognition particle 14 kDa protein	Color2 [DarkGray]	1	4		23.4177	23.7984	23.7153	22.4159	22.6095	23.026
+	1.48625	-0.810003	P37198	NUP62_HUMAN	NUP62	Nuclear pore glycoprotein p62	Color2 [DarkGray]	1	4		18.7351	18.7512	18.3931	19.8616	19.3455	19.1024
+	3.20694	0.781874	P38159	RBMX_HUMAN	RBMX	RNA-binding motif protein, X chromosome	Color2 [DarkGray]	1	4		24.044	24.2202	23.9774	23.2305	23.3239	23.3416
+	1.76611	3.03537	P39656;P39656-2;P39656-3	OST48_HUMAN	DDOST	Dolichyl-diphosphooligosaccharide--protein glycosyltransferase 48 kDa subunit	Color2 [DarkGray]	1	4		17.7891	18.3394	17.324	13.7799	16.1664	14.4001
+	2.2179	0.815497	P40937;P40937-2	RFC5_HUMAN	RFC5	Replication factor C subunit 5	Color2 [DarkGray]	1	4		20.4743	20.2856	20.2073	19.6149	19.245	19.6608
+	2.70046	1.10565	P40938;P40938-2	RFC3_HUMAN	RFC3	Replication factor C subunit 3	Color2 [DarkGray]	1	4		20.1756	20.3426	20.1906	18.8845	19.1225	19.3848
+	3.17095	1.16161	P42166	LAP2A_HUMAN	TMPO	Lamina-associated polypeptide 2, isoform alpha	Color2 [DarkGray]	1	4		24.4992	24.5032	24.2861	23.0716	23.3789	23.3532
+	1.6184	-0.893728	P42694	HELZ_HUMAN	HELZ	Probable helicase with zinc finger domain	Color2 [DarkGray]	1	4		20.5106	19.7484	20.0638	20.8019	20.9784	21.2236
+	2.33273	1.12572	P46013	KI67_HUMAN	MKI67	Proliferation marker protein Ki-67	Color2 [DarkGray]	1	4		19.8631	20.0906	19.9345	19.1495	18.5082	18.8534
+	2.71581	0.773188	P48634	PRC2A_HUMAN	PRRC2A	Protein PRRC2A	Color2 [DarkGray]	1	4		20.8298	20.8176	20.9716	19.9669	20.0498	20.2827
+	2.09484	0.984034	P49458	SRP09_HUMAN	SRP9	Signal recognition particle 9 kDa protein	Color2 [DarkGray]	1	4		22.328	22.8062	22.7567	21.4468	21.5978	21.8941
+	1.66026	3.10176	P49916;P49916-2;P49916-3;P49916-4	DNLI3_HUMAN	LIG3	DNA ligase 3	Color2 [DarkGray]	1	4		17.8859	18.111	17.7556	16.3078	13.3839	14.7556
+	2.72668	0.670181	P50402	EMD_HUMAN	EMD	Emerin	Color2 [DarkGray]	1	4		21.68	21.5742	21.3797	20.8281	20.8754	20.9198
+	2.55303	-0.640066	P51398;P51398-2;P51398-3	RT29_HUMAN	DAP3	Small ribosomal subunit protein mS29	Color2 [DarkGray]	1	4		19.8672	20.1481	20.0098	20.7206	20.542	20.6827
+	2.14233	-0.576382	P55081	MFAP1_HUMAN	MFAP1	Microfibrillar-associated protein 1	Color2 [DarkGray]	1	4		22.6857	22.7006	22.5538	23.1377	23.1015	23.4301
+	1.70744	0.735253	P57737-3;Q9Y3D7	CORO7_HUMAN;TIM16_HUMAN	CORO7;PAM16	Isoform of P57737, Isoform 3 of Coronin-7	Color2 [DarkGray]	1	4		20.2713	20.554	20.5357	19.9687	19.388	19.7985
+	1.90052	0.653003	P60228	EIF3E_HUMAN	EIF3E	Eukaryotic translation initiation factor 3 subunit E	Color2 [DarkGray]	1	4		23.8643	23.8561	23.8006	23.2571	22.8993	23.4057
+	1.97833	-1.24648	P60660;P60660-2	MYL6_HUMAN	MYL6	Myosin light polypeptide 6	Color2 [DarkGray]	1	4		26.8988	27.0246	27.0114	28.6257	28.3421	27.7065
+	2.07603	0.718105	P61011;P61011-2	SRP54_HUMAN	SRP54	Signal recognition particle subunit SRP54	Color2 [DarkGray]	1	4		24.0728	24.2276	24.2473	23.4148	23.2548	23.7239
+	3.07429	-0.334774	P62847;P62847-2;P62847-3;P62847-4	RS24_HUMAN	RPS24	Small ribosomal subunit protein eS24	Color2 [DarkGray]	1	4		29.2255	29.1649	29.1323	29.5471	29.4612	29.5187
+	2.00812	0.928692	P63000;P63000-2	RAC1_HUMAN	RAC1	Ras-related C3 botulinum toxin substrate 1	Color2 [DarkGray]	1	4		22.0041	22.0974	21.5009	21.0848	20.8233	20.9082
+	2.56109	-0.659238	P82650	RT22_HUMAN	MRPS22	Small ribosomal subunit protein mS22	Color2 [DarkGray]	1	4		20.7056	20.5447	20.6471	21.1224	21.3329	21.4199
+	1.56899	-3.62571	P82673	RT35_HUMAN	MRPS35	Small ribosomal subunit protein mS35	Color2 [DarkGray]	1	4		15.7145	18.2084	14.6343	19.6215	19.9266	19.8862
+	2.1045	-0.585011	P82933	RT09_HUMAN	MRPS9	Small ribosomal subunit protein uS9m	Color2 [DarkGray]	1	4		20.1307	19.788	19.9805	20.4519	20.5284	20.6739
+	1.47384	1.01344	Q00059	TFAM_HUMAN	TFAM	Transcription factor A, mitochondrial	Color2 [DarkGray]	1	4		20.4529	21.0761	21.3894	20.0694	20.1663	19.6424
+	2.49015	0.495825	Q00325-2;Q00325	S25A3_HUMAN	SLC25A3	Solute carrier family 25 member 3	Color2 [DarkGray]	1	4		22.1274	22.1726	22.2485	21.7758	21.5483	21.7368
+	3.08221	1.78849	Q01844;Q01844-3;Q01844-5;Q01844-6	EWS_HUMAN	EWSR1	RNA-binding protein EWS	Color2 [DarkGray]	1	4		25.7601	25.5833	25.7927	23.6738	23.808	24.2888
+	2.04094	-0.739272	Q05519;Q05519-2	SRS11_HUMAN	SRSF11	Serine/arginine-rich splicing factor 11	Color2 [DarkGray]	1	4		22.3656	22.5261	22.6487	23.107	23.1328	23.5184
+	3.613	0.92934	Q06787-8;Q06787-9	FMR1_HUMAN	FMR1	Isoform of Q06787, Isoform 8 of Fragile X messenger ribonucleoprotein 1	Color2 [DarkGray]	1	4		20.6686	20.7977	20.5913	19.7286	19.697	19.8441
+	1.88855	-0.586093	Q08170	SRSF4_HUMAN	SRSF4	Serine/arginine-rich splicing factor 4	Color2 [DarkGray]	1	4		21.6927	21.9905	21.5763	22.4511	22.3214	22.2453
+	2.34326	0.740054	Q12797	ASPH_HUMAN	ASPH	Aspartyl/asparaginyl beta-hydroxylase	Color2 [DarkGray]	1	4		20.7042	21.0703	20.9112	20.1106	20.2979	20.0569
+	3.20708	-0.524818	Q12899	TRI26_HUMAN	TRIM26	Tripartite motif-containing protein 26	Color2 [DarkGray]	1	4		22.4423	22.4327	22.4021	22.9363	22.8676	23.0476
+	1.90605	-0.604918	Q12965	MYO1E_HUMAN	MYO1E	Unconventional myosin-Ie	Color2 [DarkGray]	1	4		23.4932	23.6417	23.5717	24.3447	24.2653	23.9114
+	1.68624	0.810624	Q13162	PRDX4_HUMAN	PRDX4	Peroxiredoxin-4	Color2 [DarkGray]	1	4		20.7413	20.9122	21.1603	20.2449	20.3655	19.7715
+	2.90625	-0.565957	Q13247;Q13247-3	SRSF6_HUMAN	SRSF6	Serine/arginine-rich splicing factor 6	Color2 [DarkGray]	1	4		25.3117	25.4783	25.2619	25.8714	25.9506	25.9278
+	1.88892	-0.514429	Q13595;Q13595-2;Q13595-3;Q13595-4	TRA2A_HUMAN	TRA2A	Transformer-2 protein homolog alpha	Color2 [DarkGray]	1	4		21.0553	20.8271	21.1483	21.4452	21.4575	21.6713
+	1.67603	1.40656	Q13619	CUL4A_HUMAN	CUL4A	Cullin-4A	Color2 [DarkGray]	1	4		21.4947	22.4415	21.3302	20.4732	20.031	20.5426
+	2.032	-0.941261	Q13895	BYST_HUMAN	BYSL	Bystin	Color2 [DarkGray]	1	4		21.9919	22.0965	22.2667	22.8579	22.8951	23.4259
+	2.69326	0.688023	Q14157;Q14157-5	UBP2L_HUMAN	UBAP2L	Ubiquitin-associated protein 2-like	Color2 [DarkGray]	1	4		22.7224	22.7881	22.7565	21.9384	22.0131	22.2514
+	2.62852	1.26893	Q14244;Q14244-3	MAP7_HUMAN	MAP7	Ensconsin	Color2 [DarkGray]	1	4		22.3807	21.916	21.8092	20.8526	20.6565	20.79
+	2.73941	1.24309	Q14331	FRG1_HUMAN	FRG1	Protein FRG1	Color2 [DarkGray]	1	4		22.1369	22.3743	22.4393	20.9563	20.9087	21.3562
+	2.18457	0.67211	Q14980;Q14980-2	NUMA1_HUMAN	NUMA1	Nuclear mitotic apparatus protein 1	Color2 [DarkGray]	1	4		17.9596	18.1864	18.3565	17.3767	17.5537	17.5557
+	2.0126	1.33522	Q15233	NONO_HUMAN	NONO	Non-POU domain-containing octamer-binding protein	Color2 [DarkGray]	1	4		22.983	23.7488	23.4284	22.4155	21.899	21.8401
+	2.04305	-0.514029	Q15287;Q15287-2;Q15287-3	RNPS1_HUMAN	RNPS1	RNA-binding protein with serine-rich domain 1	Color2 [DarkGray]	1	4		21.2097	21.2927	21.2795	21.7188	21.6265	21.9787
+	1.71967	-1.62199	Q15388	TOM20_HUMAN	TOMM20	Mitochondrial import receptor subunit TOM20 homolog	Color2 [DarkGray]	1	4		18.8835	18.0872	18.3713	20.7538	19.905	19.5491
+	3.84854	2.62095	Q16531	DDB1_HUMAN	DDB1	DNA damage-binding protein 1	Color2 [DarkGray]	1	4		24.406	23.9974	23.9091	21.2835	21.5428	21.6233
+	2.53237	0.58924	Q16643;Q16643-2;Q16643-3	DREB_HUMAN	DBN1	Drebrin	Color2 [DarkGray]	1	4		18.0577	17.8959	17.9461	17.2924	17.532	17.3076
+	1.49751	1.13085	Q16698;Q16698-2	DECR_HUMAN	DECR1	2,4-dienoyl-CoA reductase [(3E)-enoyl-CoA-producing], mitochondrial	Color2 [DarkGray]	1	4		22.5308	22.7889	22.3765	21.0458	21.1711	22.0868
+	2.64037	0.856623	Q3KQU3;Q3KQU3-4	MA7D1_HUMAN	MAP7D1	MAP7 domain-containing protein 1	Color2 [DarkGray]	1	4		19.8994	19.9936	20.045	19.1068	18.9299	19.3315
+	2.15388	1.12823	Q3MHD2;Q3MHD2-2	LSM12_HUMAN	LSM12	Protein LSM12	Color2 [DarkGray]	1	4		21.9282	22.2656	21.7706	20.9014	20.5528	21.1255
+	1.84594	0.589272	Q4G0J3;Q4G0J3-3	LARP7_HUMAN	LARP7	La-related protein 7	Color2 [DarkGray]	1	4		19.9411	19.7643	20.1004	19.3133	19.1851	19.5396
+	1.99109	0.6202	Q53GQ0	DHB12_HUMAN	HSD17B12	Very-long-chain 3-oxoacyl-CoA reductase	Color2 [DarkGray]	1	4		20.5193	20.7912	20.6989	19.9193	19.9623	20.2672
+	2.14143	0.730932	Q5F1R6;Q5F1R6-3	DJC21_HUMAN	DNAJC21	DnaJ homolog subfamily C member 21	Color2 [DarkGray]	1	4		22.1336	22.0282	22.2695	21.3095	21.2641	21.6649
+	1.73534	-0.607286	Q5JTH9;Q5JTH9-2;Q5JTH9-3	RRP12_HUMAN	RRP12	RRP12-like protein	Color2 [DarkGray]	1	4		20.5768	20.8	20.6877	21.142	21.1606	21.5837
+	1.97	0.830617	Q5M775;Q5M775-4	CYTSB_HUMAN	SPECC1	Cytospin-B	Color2 [DarkGray]	1	4		18.4831	19.0772	18.5987	17.838	17.9355	17.8936
+	1.50684	1.76252	Q5T5U3	RHG21_HUMAN	ARHGAP21	Rho GTPase-activating protein 21	Color2 [DarkGray]	1	4		17.9442	18.1154	18.1824	15.7285	15.8371	17.3888
+	1.4438	0.933313	Q63HN8;Q63HN8-4	RN213_HUMAN	RNF213	E3 ubiquitin-protein ligase RNF213	Color2 [DarkGray]	1	4		17.1861	17.5673	17.6555	16.0334	16.6504	16.9252
+	2.16861	0.924716	Q6NUQ4;Q6NUQ4-2	TM214_HUMAN	TMEM214	Transmembrane protein 214	Color2 [DarkGray]	1	4		19.3991	19.3793	19.7233	18.4393	18.4303	18.858
+	2.7965	-0.447	Q6PD62	CTR9_HUMAN	CTR9	RNA polymerase-associated protein CTR9 homolog	Color2 [DarkGray]	1	4		23.8527	23.7383	23.7315	24.2004	24.1582	24.3049
+	2.5948	0.674751	Q6WCQ1	MPRIP_HUMAN	MPRIP	Myosin phosphatase Rho-interacting protein	Color2 [DarkGray]	1	4		21.9753	21.7439	21.6943	21.1101	21.0535	21.2255
+	3.78843	0.730778	Q71RC2;Q71RC2-4	LARP4_HUMAN	LARP4	La-related protein 4	Color2 [DarkGray]	1	4		22.3966	22.3484	22.3556	21.5402	21.6537	21.7144
+	1.68187	1.39583	Q7L0Y3	TM10C_HUMAN	TRMT10C	tRNA methyltransferase 10 homolog C	Color2 [DarkGray]	1	4		20.4587	21.7221	20.9198	19.6226	19.5127	19.7779
+	1.88399	-0.479953	Q7L4I2;Q7L4I2-2	RSRC2_HUMAN	RSRC2	Arginine/serine-rich coiled-coil protein 2	Color2 [DarkGray]	1	4		21.6606	21.7461	21.5285	22.049	22.0156	22.3105
+	2.40707	0.818766	Q7Z417	NUFP2_HUMAN	NUFIP2	FMR1-interacting protein NUFIP2	Color2 [DarkGray]	1	4		22.3219	22.2536	22.2796	21.3192	21.343	21.7366
+	2.59627	1.23811	Q7Z478	DHX29_HUMAN	DHX29	ATP-dependent RNA helicase DHX29	Color2 [DarkGray]	1	4		21.1472	21.1787	21.2244	19.9443	19.6297	20.2619
+	2.39655	-1.26889	Q7Z4Q2	HEAT3_HUMAN	HEATR3	HEAT repeat-containing protein 3	Color2 [DarkGray]	1	4		19.3353	19.0258	19.4688	20.4741	20.2964	20.8661
+	2.84977	1.01896	Q86UE4	LYRIC_HUMAN	MTDH	Protein LYRIC	Color2 [DarkGray]	1	4		22.2336	22.3796	22.5938	21.3656	21.2607	21.5238
+	2.31098	0.797647	Q86XZ4	SPAS2_HUMAN	SPATS2	Spermatogenesis-associated serine-rich protein 2	Color2 [DarkGray]	1	4		22.6867	22.7331	22.5482	21.7552	21.7028	22.1171
+	1.63114	0.66071	Q8IWS0;Q8IWS0-3;Q8IWS0-5	PHF6_HUMAN	PHF6	PHD finger protein 6	Color2 [DarkGray]	1	4		19.7604	20.2874	20.2258	19.5457	19.274	19.4718
+	2.99793	-0.358973	Q8IXH6	T53I2_HUMAN	TP53INP2	Tumor protein p53-inducible nuclear protein 2	Color2 [DarkGray]	1	4		21.6651	21.7673	21.7845	22.0932	22.0681	22.1326
+	1.39649	1.24784	Q8IY67-2	RAVR1_HUMAN	RAVER1	Isoform of Q8IY67, Isoform 2 of Ribonucleoprotein PTB-binding 1	Color2 [DarkGray]	1	4		17.9628	19.3838	18.6433	17.2722	17.4738	17.5004
+	2.31631	-0.810063	Q8N3C0	ASCC3_HUMAN	ASCC3	Activating signal cointegrator 1 complex subunit 3	Color2 [DarkGray]	1	4		22.172	22.3213	22.3312	22.9116	22.995	23.348
+	2.49088	1.84272	Q8N3V7-2	SYNPO_HUMAN	SYNPO	Isoform of Q8N3V7, Isoform 2 of Synaptopodin	Color2 [DarkGray]	1	4		20.1318	19.7689	19.8629	17.8651	17.7534	18.6169
+	1.42412	1.48469	Q8N684;Q8N684-2;Q8N684-3	CPSF7_HUMAN	CPSF7	Cleavage and polyadenylation specificity factor subunit 7	Color2 [DarkGray]	1	4		20.0053	21.6091	20.5391	19.3807	19.3109	19.0078
+	1.92334	0.603294	Q8N884	CGAS_HUMAN	CGAS	Cyclic GMP-AMP synthase	Color2 [DarkGray]	1	4		21.7694	21.4078	21.5831	21.063	21.0838	20.8036
+	2.13208	-1.69605	Q8N9N2-2	ASCC1_HUMAN	ASCC1	Isoform of Q8N9N2, Isoform 2 of Activating signal cointegrator 1 complex subunit 1	Color2 [DarkGray]	1	4		20.4676	19.7284	20.5675	21.7976	21.6885	22.3656
+	2.54043	-0.784484	Q8NAV1	PR38A_HUMAN	PRPF38A	Pre-mRNA-splicing factor 38A	Color2 [DarkGray]	1	4		21.2405	21.0507	21.2466	21.9135	21.8177	22.1601
+	3.63415	1.271	Q8NCA5	FA98A_HUMAN	FAM98A	Protein FAM98A	Color2 [DarkGray]	1	4		20.9498	20.9616	21.0193	19.5167	19.7499	19.8511
+	1.98176	0.836764	Q8ND56;Q8ND56-2;Q8ND56-3	LS14A_HUMAN	LSM14A	Protein LSM14 homolog A	Color2 [DarkGray]	1	4		22.7463	22.9525	23.1748	22.0213	21.9516	22.3904
+	1.38792	-0.967747	Q8WUQ7;Q8WUQ7-2	CATIN_HUMAN	CACTIN	Splicing factor Cactin	Color2 [DarkGray]	1	4		15.8946	16.9372	16.2875	17.27	17.1856	17.5669
+	2.25848	0.483317	Q8WUY1	THEM6_HUMAN	THEM6	Protein THEM6	Color2 [DarkGray]	1	4		20.4624	20.6626	20.4613	20.1359	19.9367	20.0637
+	3.25724	0.687763	Q8WWI1-3	LMO7_HUMAN	LMO7	Isoform of Q8WWI1, Isoform 3 of LIM domain only protein 7	Color2 [DarkGray]	1	4		21.8798	21.7892	21.7012	21.0728	21.1908	21.0433
+	3.55493	3.45125	Q8WWK9-5	CKAP2_HUMAN	CKAP2	Isoform of Q8WWK9, Isoform 3 of Cytoskeleton-associated protein 2	Color2 [DarkGray]	1	4		19.3773	19.1273	19.4336	15.5651	15.6138	16.4056
+	1.73724	0.765578	Q8WWM7	ATX2L_HUMAN	ATXN2L	Ataxin-2-like protein	Color2 [DarkGray]	1	4		22.2729	22.3478	22.1114	21.3344	21.2529	21.8479
+	2.21638	-0.608634	Q8WXA9;Q8WXA9-2	SREK1_HUMAN	SREK1	Splicing regulatory glutamine/lysine-rich protein 1	Color2 [DarkGray]	1	4		19.9567	20.1344	19.7968	20.5264	20.4963	20.6911
+	3.44393	0.866742	Q8WXX5	DNJC9_HUMAN	DNAJC9	DnaJ homolog subfamily C member 9	Color2 [DarkGray]	1	4		23.7709	23.8363	23.8595	22.8978	22.869	23.0997
+	3.0059	2.60748	Q8WYP5;Q8WYP5-2;Q8WYP5-3	ELYS_HUMAN	AHCTF1	Protein ELYS	Color2 [DarkGray]	1	4		17.7807	18.1699	18.3227	15.8809	15.008	15.5619
+	1.91169	1.38228	Q92499	DDX1_HUMAN	DDX1	ATP-dependent RNA helicase DDX1	Color2 [DarkGray]	1	4		21.1493	21.753	22.0016	19.9988	20.126	20.6322
+	3.68437	-0.948341	Q92614;Q92614-4	MY18A_HUMAN	MYO18A	Unconventional myosin-XVIIIa	Color2 [DarkGray]	1	4		20.1175	20.0414	20.1628	20.9835	21.1838	20.9994
+	2.44609	-1.90296	Q92665	RT31_HUMAN	MRPS31	Small ribosomal subunit protein mS31	Color2 [DarkGray]	1	4		17.4276	17.8167	16.9118	19.5216	19.3762	18.9672
+	3.21308	1.04914	Q92804;Q92804-2	RBP56_HUMAN	TAF15	TATA-binding protein-associated factor 2N	Color2 [DarkGray]	1	4		26.2853	26.0397	26.0616	24.9521	25.2053	25.0818
+	1.66119	1.0531	Q92841	DDX17_HUMAN	DDX17	Probable ATP-dependent RNA helicase DDX17	Color2 [DarkGray]	1	4		21.7784	22.6412	21.8296	20.9157	21.01	21.1642
+	2.00985	0.77115	Q96EY1;Q96EY1-2	DNJA3_HUMAN	DNAJA3	DnaJ homolog subfamily A member 3, mitochondrial	Color2 [DarkGray]	1	4		19.0108	19.5346	19.4091	18.5446	18.6391	18.4574
+	1.8094	0.746415	Q96EY4	TMA16_HUMAN	TMA16	Translation machinery-associated protein 16	Color2 [DarkGray]	1	4		21.756	21.8345	22.3419	21.2016	21.261	21.2305
+	2.02965	-4.43885	Q96EY7	PTCD3_HUMAN	PTCD3	Small ribosomal subunit protein mS39	Color2 [DarkGray]	1	4		16.0313	16.3245	13.3726	19.5587	19.5849	19.9013
+	2.37988	-1.06256	Q96GA3	LTV1_HUMAN	LTV1	Protein LTV1 homolog	Color2 [DarkGray]	1	4		22.5448	22.5098	22.5295	23.4156	23.405	23.9511
+	1.95911	1.28632	Q96HY6;Q96HY6-2	DDRGK_HUMAN	DDRGK1	DDRGK domain-containing protein 1	Color2 [DarkGray]	1	4		19.6026	19.8606	19.5739	18.6217	17.8504	18.706
+	1.88784	0.728191	Q96JB5;Q96JB5-4	CK5P3_HUMAN	CDK5RAP3	CDK5 regulatory subunit-associated protein 3	Color2 [DarkGray]	1	4		20.9335	20.8963	20.5907	20.1469	19.8246	20.2645
+	2.96882	4.82812	Q96P11;Q96P11-2;Q96P11-4	NSUN5_HUMAN	NSUN5	28S rRNA (cytosine-C(5))-methyltransferase	Color2 [DarkGray]	1	4		19.446	19.1853	19.6029	15.4587	13.5455	14.7456
+	2.11303	0.67141	Q96PK6	RBM14_HUMAN	RBM14	RNA-binding protein 14	Color2 [DarkGray]	1	4		22.3132	21.8931	22.1756	21.5588	21.3703	21.4386
+	3.23307	-0.848153	Q99567	NUP88_HUMAN	NUP88	Nuclear pore complex protein Nup88	Color2 [DarkGray]	1	4		18.7214	18.5371	18.4929	19.3723	19.5302	19.3934
+	2.86121	-1.35777	Q9BVS4	RIOK2_HUMAN	RIOK2	Serine/threonine-protein kinase RIO2	Color2 [DarkGray]	1	4		21.1137	20.9799	21.1461	22.2482	22.3011	22.7638
+	2.11328	0.59075	Q9BXS6;Q9BXS6-2;Q9BXS6-3;Q9BXS6-4;Q9BXS6-5;Q9BXS6-6	NUSAP_HUMAN	NUSAP1	Nucleolar and spindle-associated protein 1	Color2 [DarkGray]	1	4		21.6234	21.7021	21.8266	20.9883	21.0628	21.3288
+	1.21428	2.75785	Q9BZI7;Q9BZI7-2	REN3B_HUMAN	UPF3B	Regulator of nonsense transcripts 3B	Color2 [DarkGray]	1	4		18.3291	18.4743	18.9638	17.8887	15.1646	14.4403
+	2.04012	-0.920207	Q9H1I8	ASCC2_HUMAN	ASCC2	Activating signal cointegrator 1 complex subunit 2	Color2 [DarkGray]	1	4		21.4214	21.1794	21.4472	22.0357	22.1611	22.6118
+	1.85633	-3.72928	Q9H307	PININ_HUMAN	PNN	Pinin	Color2 [DarkGray]	1	4		16.2729	18.0589	15.212	19.8936	19.9434	20.8947
+	2.20488	0.686324	Q9H6H4	REEP4_HUMAN	REEP4	Receptor expression-enhancing protein 4	Color2 [DarkGray]	1	4		20.296	20.6759	20.3066	19.678	19.7344	19.8072
+	2.3932	-1.03909	Q9NRX1	PNO1_HUMAN	PNO1	RNA-binding protein PNO1	Color2 [DarkGray]	1	4		21.5707	21.6402	21.8342	22.5951	22.5356	23.0316
+	1.74223	0.991813	Q9NUL7	DDX28_HUMAN	DDX28	Probable ATP-dependent RNA helicase DDX28	Color2 [DarkGray]	1	4		19.4216	19.308	19.8046	18.9359	18.3027	18.3201
+	1.91141	0.5148	Q9NZ01	TECR_HUMAN	TECR	Very-long-chain enoyl-CoA reductase	Color2 [DarkGray]	1	4		23.2011	23.2091	22.9285	22.7321	22.5882	22.4741
+	2.28144	0.698729	Q9NZB2;Q9NZB2-6	F120A_HUMAN	FAM120A	Constitutive coactivator of PPAR-gamma-like protein 1	Color2 [DarkGray]	1	4		21.2031	21.5192	21.5485	20.7831	20.6025	20.789
+	2.11783	0.548686	Q9P0K7;Q9P0K7-2;Q9P0K7-3;Q9P0K7-4	RAI14_HUMAN	RAI14	Ankycorbin	Color2 [DarkGray]	1	4		22.0008	21.7157	21.7149	21.2507	21.1713	21.3634
+	1.60582	0.980211	Q9P0L0;Q9P0L0-2	VAPA_HUMAN	VAPA	Vesicle-associated membrane protein-associated protein A	Color2 [DarkGray]	1	4		20.5402	21.2051	20.414	19.4754	19.912	19.8313
+	2.49036	0.784045	Q9P206-2	K1522_HUMAN	KIAA1522	Isoform of Q9P206, Isoform 2 of Uncharacterized protein KIAA1522	Color2 [DarkGray]	1	4		18.7472	18.8937	18.8586	18.2795	17.9609	17.907
+	2.05185	0.892053	Q9UG63;Q9UG63-2	ABCF2_HUMAN	ABCF2	ATP-binding cassette sub-family F member 2	Color2 [DarkGray]	1	4		21.2108	21.6101	21.3882	20.3744	20.3532	20.8054
+	2.36191	0.592815	Q9UGP8	SEC63_HUMAN	SEC63	Translocation protein SEC63 homolog	Color2 [DarkGray]	1	4		19.7572	19.9573	19.8412	19.3764	19.0968	19.304
+	2.69992	0.649975	Q9UHB6-4	LIMA1_HUMAN	LIMA1	Isoform of Q9UHB6, Isoform 4 of LIM domain and actin-binding protein 1	Color2 [DarkGray]	1	4		23.4499	23.3481	23.2024	22.5828	22.6947	22.773
+	1.70697	-0.718856	Q9UHX1-2;Q9UHX1-4;Q9UHX1-6	PUF60_HUMAN	PUF60	Isoform of Q9UHX1, Isoform 2 of Poly(U)-binding-splicing factor PUF60	Color2 [DarkGray]	1	4		22.4829	22.848	22.3496	23.1508	23.1692	23.5172
+	2.02489	0.974786	Q9UI10-3;Q9UI10-2	EI2BD_HUMAN	EIF2B4	Isoform of Q9UI10, Isoform 2 of Translation initiation factor eIF-2B subunit delta	Color2 [DarkGray]	1	4		20.2712	20.6788	20.6302	19.6394	19.2347	19.7817
+	1.82879	0.926636	Q9UIG0;Q9UIG0-2	BAZ1B_HUMAN	BAZ1B	Tyrosine-protein kinase BAZ1B	Color2 [DarkGray]	1	4		20.5449	20.4212	20.6532	19.4666	19.3349	20.0379
+	2.90763	4.55178	Q9ULV4;Q9ULV4-2;Q9ULV4-3	COR1C_HUMAN	CORO1C	Coronin-1C	Color2 [DarkGray]	1	4		19.5194	20.4435	19.6094	15.0537	14.638	16.2253
+	2.1064	-1.13059	Q9ULX3	NOB1_HUMAN	NOB1	RNA-binding protein NOB1	Color2 [DarkGray]	1	4		21.9976	21.8343	22.0713	22.8901	22.8707	23.5342
+	1.53465	0.853899	Q9UN86-2;Q9UN86	G3BP2_HUMAN	G3BP2	Ras GTPase-activating protein-binding protein 2	Color2 [DarkGray]	1	4		22.3545	23.0668	22.5105	21.6901	21.6164	22.0635
+	2.63264	-0.922503	Q9UQ35	SRRM2_HUMAN	SRRM2	Serine/arginine repetitive matrix protein 2	Color2 [DarkGray]	1	4		19.9138	19.9577	19.909	20.715	20.7176	21.1154
+	2.21371	0.978196	Q9Y224	RTRAF_HUMAN	RTRAF	RNA transcription, translation and transport factor protein	Color2 [DarkGray]	1	4		21.1419	21.6069	21.0786	20.1561	20.3035	20.4332
+	2.3527	0.645063	Q9Y295	DRG1_HUMAN	DRG1	Developmentally-regulated GTP-binding protein 1	Color2 [DarkGray]	1	4		21.3312	21.534	21.5493	20.6814	20.817	20.9809
+	2.31423	-1.90737	Q9Y2Q9	RT28_HUMAN	MRPS28	Small ribosomal subunit protein bS1m	Color2 [DarkGray]	1	4		16.976	17.0535	17.8685	19.1869	18.9039	19.5293
+	2.58074	-0.593585	Q9Y2R5	RT17_HUMAN	MRPS17	Small ribosomal subunit protein uS17m	Color2 [DarkGray]	1	4		20.5432	20.3837	20.5006	20.9865	21.0023	21.2194
+	2.72825	-0.723454	Q9Y2W1	TR150_HUMAN	THRAP3	Thyroid hormone receptor-associated protein 3	Color2 [DarkGray]	1	4		18.78	19.0675	18.8395	19.5384	19.6986	19.6203
+	2.44531	-0.845005	Q9Y3D9	RT23_HUMAN	MRPS23	Small ribosomal subunit protein mS23	Color2 [DarkGray]	1	4		19.8329	20.2177	19.9783	20.704	20.883	20.9769
+	2.02531	1.05985	Q9Y3I0	RTCB_HUMAN	RTCB	RNA-splicing ligase RtcB homolog	Color2 [DarkGray]	1	4		21.9657	22.5451	21.9522	20.9989	20.9625	21.3221
+	2.69782	1.12902	Q9Y421	FA32A_HUMAN	FAM32A	Protein FAM32A	Color2 [DarkGray]	1	4		21.7824	21.8934	22.0278	20.4921	20.9339	20.8906
+	1.73161	-0.551881	Q9Y4I1;Q9Y4I1-3;Q9Y4I1-2	MYO5A_HUMAN	MYO5A	Unconventional myosin-Va	Color2 [DarkGray]	1	4		23.0712	22.7303	22.9331	23.6007	23.5311	23.2583
+	1.48606	-2.80029	Q9Y4W6	AFG32_HUMAN	AFG3L2	AFG3-like protein 2	Color2 [DarkGray]	1	4		14.9044	17.3677	15.9652	19.789	18.7971	18.0521
+	2.49809	0.941247	Q9Y520-4	PRC2C_HUMAN	PRRC2C	Isoform of Q9Y520, Isoform 4 of Protein PRRC2C	Color2 [DarkGray]	1	4		23.9137	24.0179	23.9661	22.9345	22.8302	23.3093
	0.176689	0.270735	A0A024R4E5	A0A024R4E5_HUMAN	HDLBP	Isoform of Q00341, High density lipoprotein binding protein	Color2 [DarkGray]	1	4		19.1843	20.917	19.2135	19.6679	19.5142	19.3204
	0.548435	0.41225	A0A140T912;A0A140T930;A0A140T937;A0A1W2PRZ0;O78179	A0A140T912_HUMAN;A0A140T930_HUMAN;A0A140T937_HUMAN;A0A1W2PRZ0_HUMAN;O78179_HUMAN	HLA-C	Isoform of P10321, HLA class I histocompatibility antigen, C alpha chain	Color2 [DarkGray]	1	4		19.8796	20.3295	19.3256	19.6899	19.1328	19.4752
	0.618722	1.03122	A0A2R8Y5A6;A0A2R8YDM9	A0A2R8Y5A6_HUMAN;A0A2R8YDM9_HUMAN	ATXN2	Isoform of Q99700, Ataxin 2	Color2 [DarkGray]	1	4		18.8528	19.5849	19.3482	16.8806	19.3255	18.4861
	0.157422	0.216502	A0A2R8Y738	A0A2R8Y738_HUMAN	RPL15	Isoform of P61313, Ribosomal protein L15 (Fragment)	Color2 [DarkGray]	1	4		17.8061	19.3303	17.8273	18.0316	18.3109	17.9718
	1.5267	-0.606983	A0A2R8YEA7	A0A2R8YEA7_HUMAN	ACTB	Isoform of P60709, Actin beta (Fragment)	Color2 [DarkGray]	1	4		28.799	28.6567	28.2516	29.3078	29.1961	29.0243
	0.151259	0.149253	A0A804HLA8;P63218	GBG5B_HUMAN;GBG5_HUMAN	GNG5;GNG5B	Guanine nucleotide-binding protein G(I)/G(S)/G(O) subunit gamma-5B	Color2 [DarkGray]	1	4		21.6349	20.6444	20.4653	20.8761	20.6872	20.7336
	0.24927	1.10658	A0A8V8TNX9	A0A8V8TNX9_HUMAN	PKM	Isoform of P14618, Pyruvate kinase	Color2 [DarkGray]	1	4		21.0151	25.8492	21.5533	23.4041	21.124	20.5697
	0.826354	2.3154	A0A8V8TNY3	A0A8V8TNY3_HUMAN	FAM120A	Isoform of Q9NZB2, Family with sequence similarity 120A	Color2 [DarkGray]	1	4		16.7162	19.184	18.6278	17.9364	15.212	14.4334
	0.44714	0.307662	A0FGR8-2	ESYT2_HUMAN	ESYT2	Isoform of A0FGR8, Isoform 2 of Extended synaptotagmin-2	Color2 [DarkGray]	1	4		19.0728	19.9	19.1641	18.9385	18.9286	19.3468
	1.36921	-0.545306	A5A3E0	POTEF_HUMAN	POTEF	POTE ankyrin domain family member F	Color2 [DarkGray]	1	4		27.7503	27.6116	27.2476	28.1893	28.1945	27.8616
	0.450774	0.75229	A5YKK6	CNOT1_HUMAN	CNOT1	CCR4-NOT transcription complex subunit 1	Color2 [DarkGray]	1	4		17.7045	18.7344	17.1303	17.2118	16.1125	17.988
	0.126257	0.0753721	A8MWD9;P62308	RUXGL_HUMAN;RUXG_HUMAN	SNRPG;SNRPGP15	Putative small nuclear ribonucleoprotein G-like protein 15	Color2 [DarkGray]	1	4		19.2121	19.2315	18.9741	18.7499	18.9995	19.4422
	0.164076	0.667348	D6RF23	D6RF23_HUMAN	RACK1	Isoform of P63244, Receptor for activated C kinase 1	Color2 [DarkGray]	1	4		19.7041	15.6506	19.0722	17.213	19.0967	16.1153
	0.26183	0.131571	E9PAV3;E9PAV3-2;Q13765	NACAM_HUMAN;NACA_HUMAN	NACA	Nascent polypeptide-associated complex subunit alpha, muscle-specific form	Color2 [DarkGray]	1	4		24.327	24.8889	24.2552	24.3597	24.363	24.3536
	0.283309	-0.347144	E9PMJ9	E9PMJ9_HUMAN	DENND2B	Isoform of P78524, DENN domain containing 2B (Fragment)	Color2 [DarkGray]	1	4		22.9049	21.9026	22.8704	22.1905	23.1116	23.4172
	0.206772	-0.089166	E9PRG8	CK098_HUMAN	C11orf98	Uncharacterized protein C11orf98	Color2 [DarkGray]	1	4		25.497	25.3511	24.9434	25.36	25.3168	25.3822
	0.308104	-0.364028	F5GXR3	F5GXR3_HUMAN	PTMS	Isoform of P20962, Parathymosin	Color2 [DarkGray]	1	4		18.4008	17.4071	18.8437	18.3213	18.3882	19.0342
	0.933385	-0.477551	F8W7C6	F8W7C6_HUMAN	RPL10	Isoform of P27635, Ribosomal protein L10	Color2 [DarkGray]	1	4		20.6748	20.8867	20.5381	21.0418	21.6016	20.8888
	0.0402782	0.122942	G3V1Y7	G3V1Y7_HUMAN	MYL6	Isoform of P60660, Myosin light chain 6	Color2 [DarkGray]	1	4		17.4592	16.5533	15.7138	17.7555	16.895	14.707
	0.0132387	-0.0300271	H0YBM7	H0YBM7_HUMAN	LARP1	Isoform of Q6PKG0, La ribonucleoprotein 1, translational regulator (Fragment)	Color2 [DarkGray]	1	4		17.3086	16.1033	17.4283	18.1116	15.9806	16.838
	0.0114197	-0.0643024	H0YL69	H0YL69_HUMAN	PSMA4	Isoform of P25789, Proteasome subunit alpha type (Fragment)	Color2 [DarkGray]	1	4		19.5213	22.252	16.1133	20.3193	19.3328	18.4274
	1.19468	0.278639	K7EPI4	K7EPI4_HUMAN	GFAP	Isoform of P14136, Glial fibrillary acidic protein (Fragment)	Color2 [DarkGray]	1	4		22.6528	22.4878	22.3291	22.0967	22.2702	22.267
	0.796398	-0.231902	O00159;O00159-2;O00159-3	MYO1C_HUMAN	MYO1C	Unconventional myosin-Ic	Color2 [DarkGray]	1	4		25.6285	25.2626	25.4361	25.7312	25.7813	25.5104
	0.0966147	-0.0604375	O00161	SNP23_HUMAN	SNAP23	Synaptosomal-associated protein 23	Color2 [DarkGray]	1	4		19.6648	19.1607	18.9205	19.3793	19.3228	19.2253
	0.358463	0.533351	O00178	GTPB1_HUMAN	GTPBP1	GTP-binding protein 1	Color2 [DarkGray]	1	4		17.2123	19.3364	18.0726	17.7136	17.7535	17.5542
	0.686379	-2.43211	O00203;O00203-3	AP3B1_HUMAN	AP3B1	AP-3 complex subunit beta-1	Color2 [DarkGray]	1	4		15.3886	19.8803	14.8999	19.6912	18.6753	19.0987
	0.112623	-0.391892	O00231;O00231-2	PSD11_HUMAN	PSMD11	26S proteasome non-ATPase regulatory subunit 11	Color2 [DarkGray]	1	4		15.9393	20.0666	16.7609	18.0172	17.9662	17.9591
	0.341143	0.298403	O00303	EIF3F_HUMAN	EIF3F	Eukaryotic translation initiation factor 3 subunit F	Color2 [DarkGray]	1	4		23.5669	22.8561	23.1712	22.4826	22.7401	23.4763
	0.30592	0.615208	O00410;O00410-3	IPO5_HUMAN	IPO5	Importin-5	Color2 [DarkGray]	1	4		19.7546	22.3502	20.2292	20.5238	19.9109	20.0537
	1.4544	0.7004	O00411	RPOM_HUMAN	POLRMT	DNA-directed RNA polymerase, mitochondrial	Color2 [DarkGray]	1	4		20.0206	19.8349	20.1072	18.9799	19.1961	19.6855
	0.839366	-1.849	O00422;O00422-2	SAP18_HUMAN	SAP18	Histone deacetylase complex subunit SAP18	Color2 [DarkGray]	1	4		18.8876	18.3305	15.6803	19.503	19.0264	19.916
	0.529792	0.225185	O00425	IF2B3_HUMAN	IGF2BP3	Insulin-like growth factor 2 mRNA-binding protein 3	Color2 [DarkGray]	1	4		24.0107	24.115	24.1355	23.6416	23.7186	24.2254
	1.6184	-0.173636	O00458	IFRD1_HUMAN	IFRD1	Interferon-related developmental regulator 1	Color2 [DarkGray]	1	4		23.1188	23.2005	23.2444	23.3294	23.4265	23.3287
	0.958553	0.344713	O00468-3;O00468-6	AGRIN_HUMAN	AGRN	Isoform of O00468, Isoform 3 of Agrin	Color2 [DarkGray]	1	4		17.3637	17.3781	17.2028	16.9253	16.7204	17.2647
	1.06292	-0.914495	O00488	ZN593_HUMAN	ZNF593	Zinc finger protein 593	Color2 [DarkGray]	1	4		17.1844	17.8027	18.2203	18.6416	18.1869	19.1224
	0.378021	0.769737	O00541;O00541-2	PESC_HUMAN	PES1	Pescadillo homolog	Color2 [DarkGray]	1	4		20.8534	21.533	23.5947	20.9672	21.676	21.0287
	0.0324499	-0.0202033	O00560;O00560-3	SDCB1_HUMAN	SDCBP	Syntenin-1	Color2 [DarkGray]	1	4		19.9352	20.0586	19.404	19.7644	19.9425	19.7516
	0.457731	0.251882	O00566	MPP10_HUMAN	MPHOSPH10	U3 small nucleolar ribonucleoprotein protein MPP10	Color2 [DarkGray]	1	4		19.2449	19.0598	19.3072	18.961	18.5572	19.3382
	0.526188	-0.808194	O00567	NOP56_HUMAN	NOP56	Nucleolar protein 56	Color2 [DarkGray]	1	4		19.4374	17.4367	19.1643	19.2244	19.2442	19.9945
	0.14541	0.260446	O00712;O00712-4;O00712-5	NFIB_HUMAN	NFIB	Nuclear factor 1 B-type	Color2 [DarkGray]	1	4		18.2415	20.2194	18.384	18.3041	18.913	18.8465
	0.767045	-3.07429	O00763-3;O00763;O00763-2	ACACB_HUMAN	ACACB	Acetyl-CoA carboxylase 2	Color2 [DarkGray]	1	4		14.7393	15.7464	20.4575	19.4518	19.5693	21.1451
	0.648388	0.195129	O00767	SCD_HUMAN	SCD	Stearoyl-CoA desaturase	Color2 [DarkGray]	1	4		21.165	21.4848	21.1099	21.1899	20.9535	21.031
	0.708575	0.644088	O14579	COPE_HUMAN	COPE	Coatomer subunit epsilon	Color2 [DarkGray]	1	4		20.3556	21.2956	20.1814	19.9873	19.56	20.353
	0.425864	-0.213268	O14617;O14617-4;O14617-5	AP3D1_HUMAN	AP3D1	AP-3 complex subunit delta-1	Color2 [DarkGray]	1	4		18.7712	19.4259	18.9333	19.2434	19.4077	19.1192
	0.115268	-0.0423813	O14646;O14646-2	CHD1_HUMAN	CHD1	Chromodomain-helicase-DNA-binding protein 1	Color2 [DarkGray]	1	4		21.7245	21.3483	21.6583	21.5009	21.6272	21.7302
	0.131921	0.661344	O14818	PSA7_HUMAN	PSMA7	Proteasome subunit alpha type-7	Color2 [DarkGray]	1	4		19.1782	22.8043	16.6882	19.7994	18.8087	18.0786
	0.778001	-1.81474	O14939;O14939-3;O14939-4	PLD2_HUMAN	PLD2	Phospholipase D2	Color2 [DarkGray]	1	4		19.0735	16.4902	15.6318	18.3168	19.0157	19.3072
	0.310851	0.95396	O14975;O14975-2	S27A2_HUMAN	SLC27A2	Long-chain fatty acid transport protein 2	Color2 [DarkGray]	1	4		15.9462	18.8774	17.9343	17.4029	17.6693	14.8238
	0.679427	0.851484	O14979	HNRDL_HUMAN	HNRNPDL	Heterogeneous nuclear ribonucleoprotein D-like	Color2 [DarkGray]	1	4		20.7101	22.5258	20.9636	20.5094	20.4972	20.6385
	0.263382	0.314892	O14980	XPO1_HUMAN	XPO1	Exportin-1	Color2 [DarkGray]	1	4		19.0398	20.3342	19.2406	19.5902	19.3504	18.7293
	0.212601	0.134938	O15027;O15027-5	SC16A_HUMAN	SEC16A	Protein transport protein Sec16A	Color2 [DarkGray]	1	4		19.138	19.8316	19.2142	19.1971	19.1055	19.4763
	0.648191	0.271952	O15031	PLXB2_HUMAN	PLXNB2	Plexin-B2	Color2 [DarkGray]	1	4		18.5532	18.3829	18.0791	18.2953	17.8476	18.0564
	0.35311	-0.338385	O15042;O15042-2	SR140_HUMAN	U2SURP	U2 snRNP-associated SURP motif-containing protein	Color2 [DarkGray]	1	4		17.3249	16.532	17.2287	17.7924	16.7629	17.5455
	0.0819731	0.131925	O15144	ARPC2_HUMAN	ARPC2	Actin-related protein 2/3 complex subunit 2	Color2 [DarkGray]	1	4		19.2747	20.9638	19.3189	19.8543	19.8288	19.4786
	0.810115	-0.546737	O15145	ARPC3_HUMAN	ARPC3	Actin-related protein 2/3 complex subunit 3	Color2 [DarkGray]	1	4		21.0054	19.9601	20.5417	20.9465	21.2016	20.9993
	0.394455	-0.0448087	O15226;O15226-2	NKRF_HUMAN	NKRF	NF-kappa-B-repressing factor	Color2 [DarkGray]	1	4		20.9715	21.0099	20.8866	20.9479	20.9984	21.0561
	0.959227	0.415908	O15260;O15260-2	SURF4_HUMAN	SURF4	Surfeit locus protein 4	Color2 [DarkGray]	1	4		22.3823	22.3414	21.8512	21.664	21.9957	21.6675
	1.18542	0.628	O15371;O15371-2;O15371-3	EIF3D_HUMAN	EIF3D	Eukaryotic translation initiation factor 3 subunit D	Color2 [DarkGray]	1	4		22.935	23.3273	23.1833	22.3514	22.2512	22.959
	0.92017	0.669741	O15372	EIF3H_HUMAN	EIF3H	Eukaryotic translation initiation factor 3 subunit H	Color2 [DarkGray]	1	4		23.2758	23.5547	23.0365	22.3678	22.2632	23.2267
	0.127027	-0.169702	O15381;O15381-5	NVL_HUMAN	NVL	Nuclear valosin-containing protein-like	Color2 [DarkGray]	1	4		15.9413	17.4604	17.3512	17.1241	17.0442	17.0937
	1.14689	-0.463657	O15479	MAGB2_HUMAN	MAGEB2	Melanoma-associated antigen B2	Color2 [DarkGray]	1	4		20.2288	19.727	20.2752	20.3963	20.5929	20.6328
	0.167088	0.225524	O15511;O15511-2	ARPC5_HUMAN	ARPC5	Actin-related protein 2/3 complex subunit 5	Color2 [DarkGray]	1	4		19.3682	20.8229	19.3883	19.9065	19.6593	19.337
	0.171231	0.130331	O43143	DHX15_HUMAN	DHX15	ATP-dependent RNA helicase DHX15	Color2 [DarkGray]	1	4		20.8078	21.7679	21.2694	21.115	21.0393	21.2998
	0.581483	1.4809	O43159	RRP8_HUMAN	RRP8	Ribosomal RNA-processing protein 8	Color2 [DarkGray]	1	4		18.6535	18.4627	19.1477	15.0515	18.1881	18.5817
	0.324143	1.17873	O43175	SERA_HUMAN	PHGDH	D-3-phosphoglycerate dehydrogenase	Color2 [DarkGray]	1	4		20.5104	24.3278	19.7528	21.2963	19.9699	19.7886
	0.0785591	0.0688814	O43251;O43251-10;O43251-2;O43251-4;O43251-5;O43251-6;O43251-7;O43251-8;O43251-9;Q9NWB1;Q9NWB1-2;Q9NWB1-3;Q9NWB1-4;Q9NWB1-5	RFOX1_HUMAN;RFOX2_HUMAN	RBFOX1;RBFOX2	RNA binding protein fox-1 homolog 2	Color2 [DarkGray]	1	4		17.7888	18.3932	17.4727	17.5679	17.7934	18.0868
	0.274887	0.379814	O43324;O43324-2	MCA3_HUMAN	EEF1E1	Eukaryotic translation elongation factor 1 epsilon-1	Color2 [DarkGray]	1	4		18.7836	20.3486	18.6317	18.897	18.7263	19.0012
	1.04602	0.331309	O43390	HNRPR_HUMAN	HNRNPR	Heterogeneous nuclear ribonucleoprotein R	Color2 [DarkGray]	1	4		21.7664	22.0247	22.2234	21.6987	21.545	21.7769
	0.58581	1.23629	O43390-2	HNRPR_HUMAN	HNRNPR	Isoform of O43390, Isoform 2 of Heterogeneous nuclear ribonucleoprotein R	Color2 [DarkGray]	1	4		19.3786	19.3015	19.5405	16.2997	18.9614	19.2506
	0.412352	0.601455	O43663;O43663-2;O43663-3;O43663-4	PRC1_HUMAN	PRC1	Protein regulator of cytokinesis 1	Color2 [DarkGray]	1	4		16.0297	15.9823	16.6903	14.7015	16.6867	15.5097
	0.780244	1.57395	O43707	ACTN4_HUMAN	ACTN4	Alpha-actinin-4	Color2 [DarkGray]	1	4		19.6211	22.2958	19.4824	19.0708	19.0413	18.5653
	0.416045	-0.121904	O43795	MYO1B_HUMAN	MYO1B	Unconventional myosin-Ib	Color2 [DarkGray]	1	4		23.4598	23.4682	23.3978	23.5762	23.7699	23.3454
	0.582542	1.51462	O43813	LANC1_HUMAN	LANCL1	Glutathione S-transferase LANCL1	Color2 [DarkGray]	1	4		19.2414	21.1014	18.5872	19.2548	18.7406	16.3908
	0.762261	-0.391038	O43823	AKAP8_HUMAN	AKAP8	A-kinase anchor protein 8	Color2 [DarkGray]	1	4		18.5392	18.0269	18.7591	18.793	18.6954	19.01
	0.240995	0.705652	O43852-2;O43852-4	CALU_HUMAN	CALU	Isoform of O43852, Isoform 2 of Calumenin	Color2 [DarkGray]	1	4		19.1119	21.3822	19.9283	20.8889	19.7532	17.6633
	0.954548	1.80704	O60427	FADS1_HUMAN	FADS1	Acyl-CoA (8-3)-desaturase	Color2 [DarkGray]	1	4		19.2268	19.0188	19.5199	16.145	19.109	17.0904
	0.72146	0.45191	O60506;O60506-2	HNRPQ_HUMAN	SYNCRIP	Heterogeneous nuclear ribonucleoprotein Q	Color2 [DarkGray]	1	4		22.1466	23.061	22.9209	22.3284	22.2255	22.2189
	1.28983	1.13109	O60573	IF4E2_HUMAN	EIF4E2	Eukaryotic translation initiation factor 4E type 2	Color2 [DarkGray]	1	4		19.4451	18.7507	19.977	17.8468	18.4962	18.4365
	1.32705	0.29515	O60814;P57053;P58876;P62807;Q5QNW6;Q5QNW6-2;Q93079;Q99877;Q99879	H2B1C_HUMAN;H2B1D_HUMAN;H2B1H_HUMAN;H2B1K_HUMAN;H2B1M_HUMAN;H2B1N_HUMAN;H2B2F_HUMAN;H2BFS_HUMAN	H2BC10;H2BC12;H2BC12L;H2BC14;H2BC15;H2BC18;H2BC5;H2BC9	Histone H2B type 1-K	Color2 [DarkGray]	1	4		28.8153	28.9812	29.0676	28.6338	28.5477	28.7972
	0.271258	-0.157789	O60832	DKC1_HUMAN	DKC1	H/ACA ribonucleoprotein complex subunit DKC1	Color2 [DarkGray]	1	4		20.8778	20.669	20.889	20.6762	20.8284	21.4045
	0.172989	-0.113427	O60841	IF2P_HUMAN	EIF5B	Eukaryotic translation initiation factor 5B	Color2 [DarkGray]	1	4		23.3845	23.829	23.6913	23.416	23.6904	24.1387
	0.435188	0.619491	O60884	DNJA2_HUMAN	DNAJA2	DnaJ homolog subfamily A member 2	Color2 [DarkGray]	1	4		19.0828	20.2582	18.2666	18.9709	18.4072	18.3711
	0.975695	0.194377	O75179;O75179-2;O75179-7	ANR17_HUMAN	ANKRD17	Ankyrin repeat domain-containing protein 17	Color2 [DarkGray]	1	4		21.672	21.673	21.6629	21.4941	21.3046	21.6261
	1.02134	1.39996	O75396	SC22B_HUMAN	SEC22B	Vesicle-trafficking protein SEC22b	Color2 [DarkGray]	1	4		18.6387	20.5431	18.7792	18.1333	18.0998	17.528
	0.876567	0.424578	O75475	PSIP1_HUMAN	PSIP1	PC4 and SFRS1-interacting protein	Color2 [DarkGray]	1	4		20.164	20.7355	20.8611	20.2932	20.138	20.0557
	0.308728	1.1202	O75477	ERLN1_HUMAN	ERLIN1	Erlin-1	Color2 [DarkGray]	1	4		19.3207	18.9119	17.5035	18.8716	14.7114	18.7925
	0.412606	-1.52315	O75494;O75494-2;O75494-3;O75494-4;O75494-5;O75494-6	SRS10_HUMAN	SRSF10	Serine/arginine-rich splicing factor 10	Color2 [DarkGray]	1	4		22.3085	17.5261	22.1297	21.9523	22.312	22.2696
	0.610872	0.178411	O75533	SF3B1_HUMAN	SF3B1	Splicing factor 3B subunit 1	Color2 [DarkGray]	1	4		19.3446	19.4989	19.4319	19.2207	19.0476	19.4719
	1.56865	-0.645636	O75569	PRKRA_HUMAN	PRKRA	Interferon-inducible double-stranded RNA-dependent protein kinase activator A	Color2 [DarkGray]	1	4		21.018	20.9296	20.9478	21.4251	21.4218	21.9855
	0.420125	-1.08823	O75643	U520_HUMAN	SNRNP200	U5 small nuclear ribonucleoprotein 200 kDa helicase	Color2 [DarkGray]	1	4		15.7095	19.1588	18.7021	18.7414	18.7077	19.386
	0.392246	0.809418	O75683	SURF6_HUMAN	SURF6	Surfeit locus protein 6	Color2 [DarkGray]	1	4		19.4917	19.7073	19.4314	19.8411	17.0251	19.336
	1.82789	0.473996	O75695	XRP2_HUMAN	RP2	Protein XRP2	Color2 [DarkGray]	1	4		21.0086	20.7573	20.6561	20.2358	20.3761	20.3881
	1.72057	0.506589	O75781	PALM_HUMAN	PALM	Paralemmin-1	Color2 [DarkGray]	1	4		21.8033	21.8394	21.6441	21.2515	21.4636	21.0519
	0.564457	0.474678	O75821	EIF3G_HUMAN	EIF3G	Eukaryotic translation initiation factor 3 subunit G	Color2 [DarkGray]	1	4		23.2916	23.4234	23.2068	22.33	22.6179	23.5498
	1.19968	1.35663	O75822	EIF3J_HUMAN	EIF3J	Eukaryotic translation initiation factor 3 subunit J	Color2 [DarkGray]	1	4		20.9885	22.5553	20.9859	20.0359	20.0799	20.344
	0.204912	0.0911217	O75955	FLOT1_HUMAN	FLOT1	Flotillin-1	Color2 [DarkGray]	1	4		19.592	19.5357	19.316	19.3122	19.6795	19.1787
	0.869698	0.475569	O75964	ATP5L_HUMAN	ATP5MG	ATP synthase subunit g, mitochondrial	Color2 [DarkGray]	1	4		18.4224	19.0787	18.463	18.4091	17.9252	18.2031
	0.344623	0.168461	O76021	RL1D1_HUMAN	RSL1D1	Ribosomal L1 domain-containing protein 1	Color2 [DarkGray]	1	4		22.6687	22.3136	22.7414	22.6261	22.4813	22.1109
	2.14767	0.315289	O76094	SRP72_HUMAN	SRP72	Signal recognition particle subunit SRP72	Color2 [DarkGray]	1	4		24.3353	24.1822	24.2961	23.9285	23.901	24.0381
	0.767453	0.75301	O94880;O94880-1	PHF14_HUMAN	PHF14	PHD finger protein 14	Color2 [DarkGray]	1	4		18.9023	19.5027	18.8937	17.5606	18.5757	18.9034
	0.24267	-0.637877	O94964;O94964-2	SOGA1_HUMAN	SOGA1	Protein SOGA1	Color2 [DarkGray]	1	4		18.0559	15.2142	18.5325	17.8539	17.8406	18.0217
	1.01568	-0.240942	O95218;O95218-2	ZRAB2_HUMAN	ZRANB2	Zinc finger Ran-binding domain-containing protein 2	Color2 [DarkGray]	1	4		23.2549	22.9071	23.2171	23.347	23.3558	23.3991
	0.227372	0.0875009	O95232	LC7L3_HUMAN	LUC7L3	Luc7-like protein 3	Color2 [DarkGray]	1	4		20.2687	20.4951	20.6394	20.5025	20.4672	20.1711
	0.29544	0.569777	O95373	IPO7_HUMAN	IPO7	Importin-7	Color2 [DarkGray]	1	4		19.8108	21.689	19.2347	20.047	19.7763	19.2018
	0.928955	-0.17863	O95425;O95425-2;O95425-3;O95425-4	SVIL_HUMAN	SVIL	Supervillin	Color2 [DarkGray]	1	4		20.4736	20.401	20.445	20.683	20.7269	20.4456
	1.45428	0.755943	O95470	SGPL1_HUMAN	SGPL1	Sphingosine-1-phosphate lyase 1	Color2 [DarkGray]	1	4		20.2581	20.4287	20.3962	19.4363	19.3083	20.0706
	0.397867	-0.171565	O95478	NSA2_HUMAN	NSA2	Ribosome biogenesis protein NSA2 homolog	Color2 [DarkGray]	1	4		21.5656	21.0918	21.5057	21.3744	21.5649	21.7386
	0.412172	0.762655	O95573	ACSL3_HUMAN	ACSL3	Fatty acid CoA ligase Acsl3	Color2 [DarkGray]	1	4		18.2786	20.5768	18.9613	18.3005	19.2699	17.9584
	0.493652	-0.193358	O95793;O95793-2	STAU1_HUMAN	STAU1	Double-stranded RNA-binding protein Staufen homolog 1	Color2 [DarkGray]	1	4		22.4168	22.5718	22.7252	22.8078	22.4933	22.9927
	0.422801	0.467154	O95816	BAG2_HUMAN	BAG2	BAG family molecular chaperone regulator 2	Color2 [DarkGray]	1	4		20.2321	21.4562	19.9416	20.2192	20.0758	19.9336
	0.332429	1.72627	P00338;P00338-3	LDHA_HUMAN	LDHA	L-lactate dehydrogenase A chain	Color2 [DarkGray]	1	4		20.1454	26.1046	20.5769	22.4368	19.4413	19.77
	0.247866	-0.1499	P00450	CERU_HUMAN	CP	Ceruloplasmin	Color2 [DarkGray]	1	4		24.7289	24.3428	24.7576	24.9404	24.9754	24.3631
	0.952589	2.19534	P01111	RASN_HUMAN	NRAS	GTPase NRas	Color2 [DarkGray]	1	4		19.704	20.7709	20.0236	15.9087	18.9681	19.0357
	1.03773	1.24422	P02533	K1C14_HUMAN	KRT14	Keratin, type I cytoskeletal 14	Color2 [DarkGray]	1	4		24.3753	22.8233	22.7895	22.4788	22.0082	21.7685
	0.00242343	-0.0127837	P02545	LMNA_HUMAN	LMNA	Prelamin-A/C	Color2 [DarkGray]	1	4		19.072	20.8963	15.4794	19.1881	19.1234	17.1745
	1.81485	-0.363002	P02768	ALBU_HUMAN	ALB	Albumin	Color2 [DarkGray]	1	4		30.2279	29.995	30.2645	30.5725	30.5324	30.4715
	0.401323	0.788962	P02786	TFR1_HUMAN	TFRC	Transferrin receptor protein 1	Color2 [DarkGray]	1	4		21.7299	24.0729	21.5374	21.9678	21.621	21.3845
	0.443524	0.514696	P04004	VTNC_HUMAN	VTN	Vitronectin	Color2 [DarkGray]	1	4		18.0128	18.1712	18.2888	18.6226	17.0731	17.233
	0.324053	1.483	P04075;P04075-2	ALDOA_HUMAN	ALDOA	Fructose-bisphosphate aldolase A	Color2 [DarkGray]	1	4		20.0331	25.1849	19.9745	21.7285	19.5579	19.4571
	0.678589	0.329676	P04156	PRIO_HUMAN	PRNP	Major prion protein	Color2 [DarkGray]	1	4		20.1752	19.8501	19.936	19.548	20.042	19.3823
	0.848619	2.74944	P04259	K2C6B_HUMAN	KRT6B	Keratin, type II cytoskeletal 6B	Color2 [DarkGray]	1	4		20.9871	21.5484	20.2491	15.5053	20.5195	18.5114
	0.478864	0.773001	P04264	K2C1_HUMAN	KRT1	Keratin, type II cytoskeletal 1	Color2 [DarkGray]	1	4		28.8468	27.3289	27.6315	28.1767	26.4161	26.8953
	0.106132	0.177857	P04350	TBB4A_HUMAN	TUBB4A	Tubulin beta-4A chain	Color2 [DarkGray]	1	4		23.0375	24.7398	22.9204	23.2329	23.6679	23.2634
	0.375293	1.73812	P04406	G3P_HUMAN	GAPDH	Glyceraldehyde-3-phosphate dehydrogenase	Color2 [DarkGray]	1	4		22.6341	28.0165	22.6712	24.2191	21.974	21.9143
	0.325703	0.6597	P04792	HSPB1_HUMAN	HSPB1	Heat shock protein beta-1	Color2 [DarkGray]	1	4		22.0476	24.459	22.0318	22.5927	22.0426	21.924
	1.46358	0.66071	P04843	RPN1_HUMAN	RPN1	Dolichyl-diphosphooligosaccharide--protein glycosyltransferase subunit 1	Color2 [DarkGray]	1	4		21.5689	22.209	21.5985	21.0936	21.1578	21.1428
	1.62734	0.354475	P04844;P04844-2	RPN2_HUMAN	RPN2	Dolichyl-diphosphooligosaccharide--protein glycosyltransferase subunit 2	Color2 [DarkGray]	1	4		20.0757	20.1573	19.8769	19.7108	19.759	19.5766
	0.513168	0.195591	P04899	GNAI2_HUMAN	GNAI2	Guanine nucleotide-binding protein G(i) subunit alpha-2	Color2 [DarkGray]	1	4		25.131	24.8087	24.7908	24.7763	24.894	24.4733
	0.387721	-1.75444	P04908;P0C0S8;P20671;Q7L7L0;Q93077;Q96KK5;Q99878;Q9BTM1	H2A1B_HUMAN;H2A1C_HUMAN;H2A1D_HUMAN;H2A1H_HUMAN;H2A1J_HUMAN;H2A1_HUMAN;H2A3_HUMAN;H2AJ_HUMAN	H2AC12;H2AC14;H2AC17;H2AC25;H2AC6;H2AC7;H2AC8;H2AJ	Histone H2A type 1-B/E	Color2 [DarkGray]	1	4		28.776	23.171	28.9931	28.614	28.7962	28.7931
	0.0312655	0.130244	P05023;P05023-4;P05023-3	AT1A1_HUMAN	ATP1A1	Sodium/potassium-transporting ATPase subunit alpha-1	Color2 [DarkGray]	1	4		18.4347	20.6902	16.1582	19.3057	17.9139	17.6727
	0.591611	1.61036	P05089;P05089-2	ARGI1_HUMAN	ARG1	Arginase-1	Color2 [DarkGray]	1	4		19.6419	18.0051	17.98	19.0259	15.3924	16.3775
	0.168706	0.947457	P05114	HMGN1_HUMAN	HMGN1	Non-histone chromosomal protein HMG-14	Color2 [DarkGray]	1	4		15.6602	20.7631	21.1133	19.184	19.623	15.8872
	0.77737	0.274542	P05141	ADT2_HUMAN	SLC25A5	ADP/ATP translocase 2	Color2 [DarkGray]	1	4		23.2452	23.2096	23.4326	23.2778	22.7673	23.0186
	0.0668782	0.0283731	P05186	PPBT_HUMAN	ALPL	Alkaline phosphatase, tissue-nonspecific isozyme	Color2 [DarkGray]	1	4		20.704	20.2709	20.4298	20.4704	20.555	20.2943
	0.0422198	-0.0640469	P05187	PPB1_HUMAN	ALPP	Alkaline phosphatase, placental type	Color2 [DarkGray]	1	4		21.041	19.4013	20.7967	20.5426	20.5695	20.3191
	0.407983	0.431295	P05198	IF2A_HUMAN	EIF2S1	Eukaryotic translation initiation factor 2 subunit 1	Color2 [DarkGray]	1	4		20.5385	21.9782	20.8162	20.5172	20.7326	20.7893
	0.822956	1.26799	P05204	HMGN2_HUMAN	HMGN2	Non-histone chromosomal protein HMG-17	Color2 [DarkGray]	1	4		20.7336	21.7979	23.0459	20.6422	20.9984	20.1329
	0.569704	-0.152724	P05386	RLA1_HUMAN	RPLP1	Large ribosomal subunit protein P1	Color2 [DarkGray]	1	4		31.1943	31.0402	31.009	31.1613	31.1003	31.44
	0.58246	-0.590564	P05387	RLA2_HUMAN	RPLP2	Large ribosomal subunit protein P2	Color2 [DarkGray]	1	4		30.9373	29.5848	30.9125	31.0744	30.9456	31.1863
	0.444632	-0.209326	P05388	RLA0_HUMAN	RPLP0	Large ribosomal subunit protein uL10	Color2 [DarkGray]	1	4		29.1381	28.8332	29.0612	29.0067	29.075	29.5788
	0.843097	0.532995	P05455	LA_HUMAN	SSB	Lupus La protein	Color2 [DarkGray]	1	4		22.6404	23.3791	22.5763	22.5188	22.4213	22.0568
	0.450456	0.220277	P05549;P05549-5;P05549-6	AP2A_HUMAN	TFAP2A	Transcription factor AP-2-alpha	Color2 [DarkGray]	1	4		20.9107	20.8369	20.8845	20.6102	20.3201	21.0409
	0.0177279	-0.00522296	P05783	K1C18_HUMAN	KRT18	Keratin, type I cytoskeletal 18	Color2 [DarkGray]	1	4		27.1718	26.9769	26.883	27.042	27.0834	26.922
	0.443179	0.119205	P05787;P05787-2	K2C8_HUMAN	KRT8	Keratin, type II cytoskeletal 8	Color2 [DarkGray]	1	4		26.2966	26.0793	26.1191	26.0935	26.1799	25.864
	0.338269	0.129886	P06241	FYN_HUMAN	FYN	Tyrosine-protein kinase Fyn	Color2 [DarkGray]	1	4		23.5086	23.1133	23.0502	23.1383	23.1831	22.9611
	0.639854	-0.217707	P06241-2	FYN_HUMAN	FYN	Isoform of P06241, Isoform 2 of Tyrosine-protein kinase Fyn	Color2 [DarkGray]	1	4		20.9977	20.9722	21.1833	21.256	21.5145	21.0358
	0.215762	0.247942	P06576	ATPB_HUMAN	ATP5F1B	ATP synthase subunit beta, mitochondrial	Color2 [DarkGray]	1	4		21.2348	21.7961	20.4527	21.1748	21.0861	20.4789
	0.375663	1.68539	P06733	ENOA_HUMAN	ENO1	Alpha-enolase	Color2 [DarkGray]	1	4		20.8201	26.2219	21.7218	22.9595	20.5173	20.2309
	1.2229	-1.43564	P06753-2	TPM3_HUMAN	TPM3	Isoform of P06753, Isoform 2 of Tropomyosin alpha-3 chain	Color2 [DarkGray]	1	4		24.422	25.2551	24.2041	26.5362	26.4868	25.1651
	1.68058	0.320833	P06899;P23527;P33778;Q16778	H2B1B_HUMAN;H2B1J_HUMAN;H2B1O_HUMAN;H2B2E_HUMAN	H2BC11;H2BC17;H2BC21;H2BC3	Histone H2B type 1-J	Color2 [DarkGray]	1	4		27.4586	27.2481	27.2777	26.9074	27.0114	27.1031
	0.293156	1.53739	P07195	LDHB_HUMAN	LDHB	L-lactate dehydrogenase B chain	Color2 [DarkGray]	1	4		20.2499	26.1499	20.5035	22.525	20.1574	19.6088
	0.208868	1.02536	P07237	PDIA1_HUMAN	P4HB	Protein disulfide-isomerase	Color2 [DarkGray]	1	4		18.3887	24.0357	19.0335	20.7606	18.9396	18.6817
	0.266139	0.104743	P07305;P07305-2	H10_HUMAN	H1-0	Histone H1.0	Color2 [DarkGray]	1	4		20.8322	20.9613	20.7502	20.9396	20.8291	20.4607
	0.416861	1.42956	P07355;P07355-2	ANXA2_HUMAN	ANXA2	Annexin A2	Color2 [DarkGray]	1	4		21.3422	25.0699	20.5033	21.6061	20.218	20.8026
	0.300265	0.353659	P07437	TBB5_HUMAN	TUBB	Tubulin beta chain	Color2 [DarkGray]	1	4		24.6041	25.9948	24.5648	24.8778	24.6062	24.6187
	0.345326	0.289567	P07477	TRY1_HUMAN	PRSS1	Serine protease 1	Color2 [DarkGray]	1	4		25.3582	24.6712	25.3666	25.1313	25.0726	24.3233
	0.309114	1.77457	P07737	PROF1_HUMAN	PFN1	Profilin-1	Color2 [DarkGray]	1	4		19.6938	26.0469	21.1222	23.0912	19.8225	18.6254
	0.339904	0.442504	P07814	SYEP_HUMAN	EPRS1	Bifunctional glutamate/proline--tRNA ligase	Color2 [DarkGray]	1	4		21.5043	23.1357	21.6178	21.7555	21.7605	21.4143
	0.405859	1.37069	P07900;P07900-2	HS90A_HUMAN	HSP90AA1	Heat shock protein HSP 90-alpha	Color2 [DarkGray]	1	4		20.5218	24.5793	20.5234	21.4444	20.1111	19.9571
	1.1002	0.373864	P07910-2;P07910	HNRPC_HUMAN	HNRNPC	Heterogeneous nuclear ribonucleoproteins C1/C2	Color2 [DarkGray]	1	4		25.042	24.7786	25.0129	24.5162	24.3665	24.8292
	0.306222	0.124209	P07947	YES_HUMAN	YES1	Tyrosine-protein kinase Yes	Color2 [DarkGray]	1	4		21.8673	21.681	21.9833	21.5132	21.9862	21.6595
	0.298514	0.0890007	P07948-2	LYN_HUMAN	LYN	Isoform of P07948, Isoform 2 of Tyrosine-protein kinase Lyn	Color2 [DarkGray]	1	4		21.5577	21.3462	21.1785	21.328	21.3177	21.1697
	0.987212	-1.55297	P07951-2	TPM2_HUMAN	TPM2	Isoform of P07951, Isoform 2 of Tropomyosin beta chain	Color2 [DarkGray]	1	4		21.6059	22.8463	21.3639	23.9159	24.2093	22.3498
	0.00656144	0.00487645	P08174;P08174-2;P08174-3;P08174-4;P08174-5;P08174-6;P08174-7	DAF_HUMAN	CD55	Complement decay-accelerating factor	Color2 [DarkGray]	1	4		25.6248	25.0444	25.4758	25.5164	25.577	25.0369
	0.457419	1.06289	P08195;P08195-2;P08195-3;P08195-4;P08195-5	4F2_HUMAN	SLC3A2	4F2 cell-surface antigen heavy chain	Color2 [DarkGray]	1	4		22.0488	24.5951	21.523	22.25	21.5959	21.1323
	0.62991	0.681653	P08237;P08237-2;P08237-3	PFKAM_HUMAN	PFKM	ATP-dependent 6-phosphofructokinase, muscle type	Color2 [DarkGray]	1	4		18.9995	20.392	18.9259	18.946	18.6032	18.7232
	0.302723	1.09832	P08238	HS90B_HUMAN	HSP90AB1	Heat shock protein HSP 90-beta	Color2 [DarkGray]	1	4		22.892	26.9794	22.5162	23.7577	22.5746	22.7603
	0.358334	0.325171	P08240;P08240-2	SRPRA_HUMAN	SRPRA	Signal recognition particle receptor subunit alpha	Color2 [DarkGray]	1	4		19.0845	20.3073	19.6357	19.587	19.341	19.1239
	0.0178215	0.0124582	P08582	TRFM_HUMAN	MELTF	Melanotransferrin	Color2 [DarkGray]	1	4		20.5574	19.8521	19.8856	20.0253	20.1435	20.089
	0.638908	-0.238278	P08621	RU17_HUMAN	SNRNP70	U1 small nuclear ribonucleoprotein 70 kDa	Color2 [DarkGray]	1	4		22.2895	22.7377	22.5174	22.6002	22.6987	22.9606
	0.938545	0.436521	P08670	VIME_HUMAN	VIM	Vimentin	Color2 [DarkGray]	1	4		22.2045	21.7641	21.5192	21.5191	21.4263	21.2328
	0.603985	-0.308121	P08708	RS17_HUMAN	RPS17	Small ribosomal subunit protein eS17	Color2 [DarkGray]	1	4		28.6626	28.0448	28.7279	28.9217	28.6889	28.7491
	0.143722	-0.0618528	P08729	K2C7_HUMAN	KRT7	Keratin, type II cytoskeletal 7	Color2 [DarkGray]	1	4		23.2517	22.9903	23.1513	23.3125	23.3532	22.9131
	0.853898	0.22804	P08754	GNAI3_HUMAN	GNAI3	Guanine nucleotide-binding protein G(i) subunit alpha-3	Color2 [DarkGray]	1	4		24.701	24.432	24.4891	24.2789	24.4885	24.1707
	0.482232	-0.127052	P08865	RSSA_HUMAN	RPSA	Small ribosomal subunit protein uS2	Color2 [DarkGray]	1	4		29.5488	29.5265	29.4221	29.4444	29.6173	29.817
	0.428075	-0.856328	P09001	RM03_HUMAN	MRPL3	Large ribosomal subunit protein uL3m	Color2 [DarkGray]	1	4		18.4445	16.0976	18.6728	18.9384	18.1544	18.6909
	0.335818	0.940799	P09012	SNRPA_HUMAN	SNRPA	U1 small nuclear ribonucleoprotein A	Color2 [DarkGray]	1	4		18.765	19.3889	18.8543	19.0682	15.7874	19.3302
	0.843448	-2.1476	P09038;P09038-1;P09038-2;P09038-3	FGF2_HUMAN	FGF2	Fibroblast growth factor 2	Color2 [DarkGray]	1	4		19.0454	15.6575	15.8571	18.2704	18.9445	19.7878
	0.731604	0.336945	P09132	SRP19_HUMAN	SRP19	Signal recognition particle 19 kDa protein	Color2 [DarkGray]	1	4		21.5262	21.4738	21.8274	21.1331	21.6292	21.0543
	0.340301	0.167744	P09234	RU1C_HUMAN	SNRPC	U1 small nuclear ribonucleoprotein C	Color2 [DarkGray]	1	4		21.7431	22.2551	21.8454	21.6544	21.6445	22.0414
	0.610089	0.942968	P09382	LEG1_HUMAN	LGALS1	Galectin-1	Color2 [DarkGray]	1	4		22.204	23.8416	21.7174	22.0696	21.6937	21.1708
	0.23764	0.601158	P09429	HMGB1_HUMAN	HMGB1	High mobility group protein B1	Color2 [DarkGray]	1	4		19.3373	22.676	20.5463	19.9194	20.6027	20.2341
	0.493012	-0.735543	P09493-3	TPM1_HUMAN	TPM1	Isoform of P09493, Isoform 3 of Tropomyosin alpha-1 chain	Color2 [DarkGray]	1	4		23.3006	24.1725	23.0149	25.28	23.4221	23.9925
	0.705338	1.36794	P09651;P09651-2;P09651-3	ROA1_HUMAN	HNRNPA1	Heterogeneous nuclear ribonucleoprotein A1	Color2 [DarkGray]	1	4		21.8358	24.7564	23.2079	22.4294	21.6933	21.5735
	0.0560173	0.0343329	P09923	PPBI_HUMAN	ALPI	Intestinal-type alkaline phosphatase	Color2 [DarkGray]	1	4		21.5257	20.8051	21.1339	21.1477	21.1676	21.0465
	0.8441	0.501073	P0C0S5;Q71UI9	H2AV_HUMAN;H2AZ_HUMAN	H2AZ1;H2AZ2	Histone H2A.Z	Color2 [DarkGray]	1	4		24.3175	24.0335	24.1852	23.4463	24.2026	23.384
	1.5206	0.560812	P0CW18	PRS56_HUMAN	PRSS56	Serine protease 56	Color2 [DarkGray]	1	4		21.1266	21.6102	21.4493	21.021	20.7595	20.7232
	0.449898	0.775055	P0DMV8;P0DMV8-2;P0DMV9	HS71A_HUMAN;HS71B_HUMAN	HSPA1A;HSPA1B	Heat shock 70 kDa protein 1A	Color2 [DarkGray]	1	4		22.0005	24.0284	21.7547	22.043	21.9419	21.4736
	0.0565466	0.0520318	P0DP23;P0DP24;P0DP25	CALM1_HUMAN;CALM2_HUMAN;CALM3_HUMAN	CALM1;CALM2;CALM3	Calmodulin-1	Color2 [DarkGray]	1	4		27.7482	27.5755	27.5354	27.8762	27.8813	26.9455
	0.421759	-0.503626	P10155;P10155-3;P10155-4;P10155-5	RO60_HUMAN	RO60	RNA-binding protein RO60	Color2 [DarkGray]	1	4		18.8566	17.4932	19.0942	19.1687	18.9717	18.8144
	0.373186	-0.208071	P10412	H14_HUMAN	H1-4	Histone H1.4	Color2 [DarkGray]	1	4		28.0773	27.403	27.9299	28.0859	27.7901	28.1585
	0.228296	0.935554	P10599	THIO_HUMAN	TXN	Thioredoxin	Color2 [DarkGray]	1	4		21.9076	25.9087	20.8546	22.8593	21.4803	21.5246
	0.940997	0.757098	P10620	MGST1_HUMAN	MGST1	Microsomal glutathione S-transferase 1	Color2 [DarkGray]	1	4		20.1218	21.0277	20.0781	19.6671	20.0151	19.2741
	0.226187	0.773924	P10809	CH60_HUMAN	HSPD1	60 kDa heat shock protein, mitochondrial	Color2 [DarkGray]	1	4		21.2426	24.7231	21.5294	23.1454	21.3679	20.66
	0.390721	0.611558	P11021	BIP_HUMAN	HSPA5	Endoplasmic reticulum chaperone BiP	Color2 [DarkGray]	1	4		23.6718	25.641	23.7273	23.9935	23.5856	23.6264
	0.244189	0.526787	P11142	HSP7C_HUMAN	HSPA8	Heat shock cognate 71 kDa protein	Color2 [DarkGray]	1	4		23.6588	26.08	23.4572	24.1216	23.7855	23.7085
	0.642897	1.72	P11310;P11310-2	ACADM_HUMAN	ACADM	Medium-chain specific acyl-CoA dehydrogenase, mitochondrial	Color2 [DarkGray]	1	4		18.211	21.362	18.0064	18.2598	17.6919	16.4678
	0.457188	0.346031	P11498	PYC_HUMAN	PC	Pyruvate carboxylase, mitochondrial	Color2 [DarkGray]	1	4		20.4734	21.2977	20.2666	20.4769	20.179	20.3437
	0.217713	1.27289	P12268	IMDH2_HUMAN	IMPDH2	Inosine-5'-monophosphate dehydrogenase 2	Color2 [DarkGray]	1	4		18.7614	21.6121	16.2524	19.7529	14.3193	18.735
	0.414446	1.65047	P12273	PIP_HUMAN	PIP	Prolactin-inducible protein	Color2 [DarkGray]	1	4		20.8506	18.1961	19.736	18.4626	15.1094	20.2594
	0.0856801	0.5124	P12277	KCRB_HUMAN	CKB	Creatine kinase B-type	Color2 [DarkGray]	1	4		16.7056	23.6176	20.6114	21.1159	18.7164	19.565
	0.308787	1.42101	P12956;P12956-2	XRCC6_HUMAN	XRCC6	X-ray repair cross-complementing protein 6	Color2 [DarkGray]	1	4		17.17	21.2722	17.735	19.7896	15.0649	17.0596
	1.10779	3.9607	P13498	CY24A_HUMAN	CYBA	Cytochrome b-245 light chain	Color2 [DarkGray]	1	4		19.8696	20.4268	19.9289	15.2324	19.3488	13.7621
	0.657881	-0.12189	P13639	EF2_HUMAN	EEF2	Elongation factor 2	Color2 [DarkGray]	1	4		28.3564	28.1319	28.3958	28.4054	28.3948	28.4496
	0.584926	1.30085	P13645	K1C10_HUMAN	KRT10	Keratin, type I cytoskeletal 10	Color2 [DarkGray]	1	4		29.7514	26.7959	27.7385	27.6792	26.0562	26.6479
	0.917827	1.32018	P13647	K2C5_HUMAN	KRT5	Keratin, type II cytoskeletal 5	Color2 [DarkGray]	1	4		25.6387	23.8596	23.7505	23.6273	22.6943	22.9667
	0.294831	0.426442	P13674;P13674-2;P13674-3	P4HA1_HUMAN	P4HA1	Prolyl 4-hydroxylase subunit alpha-1	Color2 [DarkGray]	1	4		18.0281	19.6655	17.8765	18.2986	18.1231	17.8691
	0.0838609	-0.113376	P13984	T2FB_HUMAN	GTF2F2	General transcription factor IIF subunit 2	Color2 [DarkGray]	1	4		18.2065	19.7357	18.6212	19.2463	18.8901	18.767
	0.0781521	0.0758197	P13987;P13987-2	CD59_HUMAN	CD59	CD59 glycoprotein	Color2 [DarkGray]	1	4		25.54	24.7481	24.9912	25.3332	25.1925	24.5261
	0.173632	-0.102046	P14384	CBPM_HUMAN	CPM	Carboxypeptidase M	Color2 [DarkGray]	1	4		19.1328	18.7184	19.2083	19.4313	19.0524	18.8819
	0.236764	1.09416	P14625	ENPL_HUMAN	HSP90B1	Endoplasmin	Color2 [DarkGray]	1	4		19.4449	24.4316	19.7354	21.6678	18.8193	19.8423
	0.989729	-0.231002	P14678	RSMB_HUMAN	SNRPB	Small nuclear ribonucleoprotein-associated proteins B and B'	Color2 [DarkGray]	1	4		21.6532	21.5276	21.8141	21.764	21.9146	22.0094
	0.255432	1.55804	P14866;P14866-2	HNRPL_HUMAN	HNRNPL	Heterogeneous nuclear ribonucleoprotein L	Color2 [DarkGray]	1	4		21.2308	20.7165	21.8497	22.3977	21.8088	14.9164
	0.151225	0.354248	P14868	SYDC_HUMAN	DARS1	Aspartate--tRNA ligase, cytoplasmic	Color2 [DarkGray]	1	4		19.4691	21.6344	18.7316	19.5418	19.502	19.7285
	0.160859	-0.121488	P14923	PLAK_HUMAN	JUP	Junction plakoglobin	Color2 [DarkGray]	1	4		23.5768	22.6701	23.1788	23.4508	23.2617	23.0777
	0.277233	0.994913	P15311	EZRI_HUMAN	EZR	Ezrin	Color2 [DarkGray]	1	4		20.0696	24.2399	20.0308	21.127	20.3247	19.9038
	0.628936	-2.11647	P15328	FOLR1_HUMAN	FOLR1	Folate receptor alpha	Color2 [DarkGray]	1	4		20.8267	16.6111	16.2525	20.4163	20.3557	19.2678
	1.36005	-0.288499	P15880	RS2_HUMAN	RPS2	Small ribosomal subunit protein uS5	Color2 [DarkGray]	1	4		29.7584	29.5417	29.8233	29.9734	29.9221	30.0934
	0.526148	0.6976	P15924	DESP_HUMAN	DSP	Desmoplakin	Color2 [DarkGray]	1	4		21.3454	21.8401	21.5917	22.02	20.4315	20.2328
	0.13475	0.0398776	P16401	H15_HUMAN	H1-5	Histone H1.5	Color2 [DarkGray]	1	4		27.7164	27.4687	27.4556	27.642	27.4186	27.4604
	0.588375	1.37474	P16435	NCPR_HUMAN	POR	NADPH--cytochrome P450 reductase	Color2 [DarkGray]	1	4		18.5571	19.1002	18.3169	18.2796	18.3214	15.249
	0.0830741	0.0313346	P16615;P16615-2;P16615-3;P16615-4;P16615-5	AT2A2_HUMAN	ATP2A2	Sarcoplasmic/endoplasmic reticulum calcium ATPase 2	Color2 [DarkGray]	1	4		19.8137	19.7707	19.5767	19.8944	19.6627	19.5099
	0.169411	0.0801398	P16989;P16989-3	YBOX3_HUMAN	YBX3	Y-box-binding protein 3	Color2 [DarkGray]	1	4		23.6584	23.9505	23.8104	23.6345	23.5112	24.0332
	0.351834	0.77397	P17066	HSP76_HUMAN	HSPA6	Heat shock 70 kDa protein 6	Color2 [DarkGray]	1	4		20.5632	23.1462	20.2708	20.5848	20.5023	20.5712
	0.913103	1.1199	P17096;P17096-3	HMGA1_HUMAN	HMGA1	High mobility group protein HMG-I/HMG-Y	Color2 [DarkGray]	1	4		22.0178	22.7552	23.8786	22.1094	21.7182	21.4643
	1.08986	0.118546	P17480;P17480-2	UBF1_HUMAN	UBTF	Nucleolar transcription factor 1	Color2 [DarkGray]	1	4		23.3553	23.2485	23.2594	23.1479	23.1161	23.2435
	0.422367	0.53389	P17858	PFKAL_HUMAN	PFKL	ATP-dependent 6-phosphofructokinase, liver type	Color2 [DarkGray]	1	4		19.4563	20.9215	19.4005	19.6238	18.9799	19.573
	0.0832729	0.289945	P17980	PRS6A_HUMAN	PSMC3	26S proteasome regulatory subunit 6A	Color2 [DarkGray]	1	4		18.079	20.8643	17.3179	19.5788	18.2759	17.5367
	0.577122	1.06648	P17987	TCPA_HUMAN	TCP1	T-complex protein 1 subunit alpha	Color2 [DarkGray]	1	4		19.8558	22.4391	20.177	20.0159	19.6286	19.6281
	0.32118	-0.185695	P18077	RL35A_HUMAN	RPL35A	Large ribosomal subunit protein eL33	Color2 [DarkGray]	1	4		29.3522	28.6993	29.3001	29.2709	29.1285	29.5093
	1.00521	-0.240334	P18124	RL7_HUMAN	RPL7	Large ribosomal subunit protein uL30	Color2 [DarkGray]	1	4		29.828	29.555	29.8939	29.9982	29.926	30.0737
	0.668736	-0.399606	P18621;P18621-3	RL17_HUMAN	RPL17	Large ribosomal subunit protein uL22	Color2 [DarkGray]	1	4		30.1974	29.343	30.099	30.2328	30.3174	30.288
	0.433505	-0.297146	P19338	NUCL_HUMAN	NCL	Nucleolin	Color2 [DarkGray]	1	4		27.6511	27.8481	27.6823	27.7287	27.746	28.5983
	0.937478	0.779275	P20042	IF2B_HUMAN	EIF2S2	Eukaryotic translation initiation factor 2 subunit 2	Color2 [DarkGray]	1	4		22.2934	23.162	22.1585	21.9876	21.9869	21.3016
	0.25393	0.144769	P20290	BTF3_HUMAN	BTF3	Transcription factor BTF3	Color2 [DarkGray]	1	4		23.7126	24.172	23.557	23.4087	23.7737	23.8249
	0.0331038	-0.139778	P20674	COX5A_HUMAN	COX5A	Cytochrome c oxidase subunit 5A, mitochondrial	Color2 [DarkGray]	1	4		18.1227	19.8442	15.1807	17.2424	18.6657	17.6589
	0.284515	0.703474	P21333;P21333-2	FLNA_HUMAN	FLNA	Filamin-A	Color2 [DarkGray]	1	4		19.5194	22.2259	19.1955	20.1015	19.5437	19.1852
	0.294361	-0.13523	P22087	FBRL_HUMAN	FBL	rRNA 2'-O-methyltransferase fibrillarin	Color2 [DarkGray]	1	4		21.1028	20.9985	21.0997	21.0171	21.0215	21.5681
	0.787579	1.38153	P22626	ROA2_HUMAN	HNRNPA2B1	Heterogeneous nuclear ribonucleoproteins A2/B1	Color2 [DarkGray]	1	4		22.0859	24.6778	22.9636	22.4078	21.648	21.5269
	0.26492	0.898336	P23284	PPIB_HUMAN	PPIB	Peptidyl-prolyl cis-trans isomerase B	Color2 [DarkGray]	1	4		20.3207	24.3575	20.4722	21.3998	20.4199	20.6357
	0.272211	-0.11774	P23396	RS3_HUMAN	RPS3	Small ribosomal subunit protein uS3	Color2 [DarkGray]	1	4		29.088	28.9103	29.3535	29.0908	29.1496	29.4647
	0.527973	3.11674	P23528	COF1_HUMAN	CFL1	Cofilin-1	Color2 [DarkGray]	1	4		19.4247	25.2015	20.1262	21.4191	18.9361	15.0471
	0.628627	2.01995	P23588;P23588-2	IF4B_HUMAN	EIF4B	Eukaryotic translation initiation factor 4B	Color2 [DarkGray]	1	4		18.5804	21.4458	18.7746	18.8351	18.545	15.3608
	0.240977	0.489267	P24534	EF1B_HUMAN	EEF1B2	Elongation factor 1-beta	Color2 [DarkGray]	1	4		21.6259	23.9084	21.4843	22.1054	21.8746	21.5709
	0.13722	-0.591407	P25311	ZA2G_HUMAN	AZGP1	Zinc-alpha-2-glycoprotein	Color2 [DarkGray]	1	4		19.9535	15.4347	18.2981	18.8061	16.811	19.8434
	1.84969	-0.310104	P25398	RS12_HUMAN	RPS12	Small ribosomal subunit protein eS12	Color2 [DarkGray]	1	4		29.5278	29.3735	29.5331	29.8214	29.6843	29.859
	0.0793841	0.106218	P25705;P25705-2	ATPA_HUMAN	ATP5F1A	ATP synthase subunit alpha, mitochondrial	Color2 [DarkGray]	1	4		20.4021	21.1614	19.9236	20.9922	20.1654	20.0108
	0.521594	1.37046	P25786;P25786-2	PSA1_HUMAN	PSMA1	Proteasome subunit alpha type-1	Color2 [DarkGray]	1	4		18.3141	21.2257	17.4867	18.0714	17.4536	17.3901
	1.43727	-0.498152	P26368;P26368-2	U2AF2_HUMAN	U2AF2	Splicing factor U2AF 65 kDa subunit	Color2 [DarkGray]	1	4		23.6422	23.8452	24.0072	24.1116	24.3448	24.5326
	0.637363	-0.334879	P26373	RL13_HUMAN	RPL13	Large ribosomal subunit protein eL13	Color2 [DarkGray]	1	4		29.9309	29.1792	29.7684	29.9866	29.8409	30.0557
	0.763822	3.63045	P26599;P26599-1;P26599-2	PTBP1_HUMAN	PTBP1	Polypyrimidine tract-binding protein 1	Color2 [DarkGray]	1	4		19.5606	23.0206	19.2653	20.0435	17.1802	13.7313
	0.541341	0.547023	P26640	SYVC_HUMAN	VARS1	Valine--tRNA ligase	Color2 [DarkGray]	1	4		20.1456	21.3748	20.1636	20.338	20.0023	19.7026
	0.103362	0.162811	P26641;P26641-2	EF1G_HUMAN	EEF1G	Elongation factor 1-gamma	Color2 [DarkGray]	1	4		21.0605	22.3706	20.7176	21.5352	21.4208	20.7042
	0.436336	-0.165695	P27635	RL10_HUMAN	RPL10	Large ribosomal subunit protein uL16	Color2 [DarkGray]	1	4		29.6803	29.4278	29.966	29.7822	29.8422	29.9468
	0.464588	1.77064	P27695	APEX1_HUMAN	APEX1	DNA-(apurinic or apyrimidinic site) endonuclease	Color2 [DarkGray]	1	4		17.6248	21.8943	19.0263	18.8979	18.7209	15.6147
	0.447198	2.83576	P27797	CALR_HUMAN	CALR	Calreticulin	Color2 [DarkGray]	1	4		18.9076	24.5821	19.1021	21.4131	18.1625	14.5089
	0.0760923	0.155749	P27816;P27816-6	MAP4_HUMAN	MAP4	Microtubule-associated protein 4	Color2 [DarkGray]	1	4		19.2146	21.5461	19.7639	20.1991	20.14	19.7182
	0.526381	2.66269	P27824;P27824-2	CALX_HUMAN	CANX	Calnexin	Color2 [DarkGray]	1	4		20.1118	22.1087	18.9088	19.8399	19.6266	13.6748
	0.563337	2.16221	P28070	PSB4_HUMAN	PSMB4	Proteasome subunit beta type-4	Color2 [DarkGray]	1	4		19.2376	21.9979	17.8847	18.9655	15.1598	18.5082
	0.0831099	0.158001	P29692;P29692-2	EF1D_HUMAN	EEF1D	Elongation factor 1-delta	Color2 [DarkGray]	1	4		22.3073	24.1581	22.1048	22.8776	22.8397	22.3789
	0.837341	0.843571	P29966	MARCS_HUMAN	MARCKS	Myristoylated alanine-rich C-kinase substrate	Color2 [DarkGray]	1	4		21.7789	22.7812	21.2421	21.2645	21.1531	20.8539
	0.850282	0.319004	P29992	GNA11_HUMAN	GNA11	Guanine nucleotide-binding protein subunit alpha-11	Color2 [DarkGray]	1	4		19.3357	19.1778	18.78	18.6748	18.7994	18.8623
	0.426022	-0.119593	P30050	RL12_HUMAN	RPL12	Large ribosomal subunit protein uL11	Color2 [DarkGray]	1	4		29.745	29.8303	29.9178	29.7456	30.1174	29.9889
	1.52788	0.617895	P30419	NMT1_HUMAN	NMT1	Glycylpeptide N-tetradecanoyltransferase 1	Color2 [DarkGray]	1	4		19.4261	19.9952	19.5869	19.1649	18.9009	19.0887
	0.224307	0.777106	P31327;P31327-3	CPSM_HUMAN	CPS1	Carbamoyl-phosphate synthase [ammonia], mitochondrial	Color2 [DarkGray]	1	4		19.0525	22.7488	19.0996	20.6286	18.6833	19.2577
	0.571401	0.868454	P31689;P31689-2	DNJA1_HUMAN	DNAJA1	DnaJ homolog subfamily A member 1	Color2 [DarkGray]	1	4		19.7966	21.5566	19.3563	19.3991	19.4751	19.2298
	0.400116	0.528777	P31943	HNRH1_HUMAN	HNRNPH1	Heterogeneous nuclear ribonucleoprotein H	Color2 [DarkGray]	1	4		22.3014	23.8134	22.0327	22.1901	22.0551	22.316
	0.291731	1.25359	P31946;P31946-2	1433B_HUMAN	YWHAB	14-3-3 protein beta/alpha	Color2 [DarkGray]	1	4		18.6188	23.705	18.9999	20.3678	18.6009	18.5942
	0.492987	1.23721	P31948;P31948-2	STIP1_HUMAN	STIP1	Stress-induced-phosphoprotein 1	Color2 [DarkGray]	1	4		19.7436	22.7081	19.3405	19.8256	19.3448	18.9101
	0.87603	4.36539	P32119	PRDX2_HUMAN	PRDX2	Peroxiredoxin-2	Color2 [DarkGray]	1	4		20.3424	23.6913	19.7579	20.7773	15.5588	14.3594
	0.101515	-0.0229626	P32969	RL9_HUMAN	RPL9P9	Large ribosomal subunit protein uL6	Color2 [DarkGray]	1	4		30.021	30.2012	29.9702	30.092	30.0135	30.1558
	0.0620544	-0.191218	P33947	ERD22_HUMAN	KDELR2	ER lumen protein-retaining receptor 2	Color2 [DarkGray]	1	4		15.2378	16.9753	17.121	14.8799	17.3581	17.6697
	0.44357	0.927922	P34931	HS71L_HUMAN	HSPA1L	Heat shock 70 kDa protein 1-like	Color2 [DarkGray]	1	4		19.6343	22.4645	20.0136	20.0581	19.6851	19.5854
	0.0289901	0.0391076	P35232	PHB1_HUMAN	PHB1	Prohibitin 1	Color2 [DarkGray]	1	4		20.978	21.2321	20.3205	21.4239	20.8232	20.1662
	2.04941	-0.247774	P35268	RL22_HUMAN	RPL22	Large ribosomal subunit protein eL22	Color2 [DarkGray]	1	4		30.3035	30.3091	30.2845	30.6341	30.4556	30.5508
	0.18717	-0.459452	P35269	T2FA_HUMAN	GTF2F1	General transcription factor IIF subunit 1	Color2 [DarkGray]	1	4		16.8231	19.9111	19.0938	18.8146	19.3704	19.0215
	0.12211	0.283374	P35527	K1C9_HUMAN	KRT9	Keratin, type I cytoskeletal 9	Color2 [DarkGray]	1	4		25.8577	25.7102	26.428	27.3461	24.7722	25.0276
	0.935868	-0.592178	P35580	MYH10_HUMAN	MYH10	Myosin-10	Color2 [DarkGray]	1	4		21.8072	21.625	21.5719	22.5646	22.5298	21.6862
	1.17428	-0.768098	P35580-2	MYH10_HUMAN	MYH10	Isoform of P35580, Isoform 2 of Myosin-10	Color2 [DarkGray]	1	4		23.5857	23.3519	23.4278	24.5176	24.5284	23.6238
	0.448265	0.807654	P35606;P35606-2	COPB2_HUMAN	COPB2	Coatomer subunit beta'	Color2 [DarkGray]	1	4		19.4425	21.4819	19.1006	18.8815	19.0993	19.6212
	0.48059	1.04635	P35613;P35613-2;P35613-3;P35613-4	BASI_HUMAN	BSG	Basigin	Color2 [DarkGray]	1	4		19.6368	22.3013	19.3657	19.6502	19.2288	19.2856
	1.04437	0.536934	P35659	DEK_HUMAN	DEK	Protein DEK	Color2 [DarkGray]	1	4		21.3148	21.8863	22.0359	21.2914	21.3257	21.0092
	0.383071	1.10973	P35908	K22E_HUMAN	KRT2	Keratin, type II cytoskeletal 2 epidermal	Color2 [DarkGray]	1	4		30.4601	26.8169	27.5237	28.1185	26.5085	26.8446
	0.422911	-1.20523	P35998	PRS7_HUMAN	PSMC2	26S proteasome regulatory subunit 7	Color2 [DarkGray]	1	4		16.1989	19.5548	15.7083	18.1201	18.3865	18.5711
	1.0462	2.73241	P36542;P36542-2	ATPG_HUMAN	ATP5F1C	ATP synthase subunit gamma, mitochondrial	Color2 [DarkGray]	1	4		19.5258	19.6203	18.5822	16.0129	18.7593	14.7588
	0.740868	-0.350545	P36578	RL4_HUMAN	RPL4	Large ribosomal subunit protein uL4	Color2 [DarkGray]	1	4		30.4003	29.7543	30.3888	30.4838	30.5012	30.6101
	0.0130602	0.0190811	P36915	GNL1_HUMAN	GNL1	Guanine nucleotide-binding protein-like 1	Color2 [DarkGray]	1	4		19.8172	21.0345	19.8892	19.7289	20.2619	20.6929
	0.359151	0.776821	P38646	GRP75_HUMAN	HSPA9	Stress-70 protein, mitochondrial	Color2 [DarkGray]	1	4		21.326	23.8213	21.0406	21.6442	21.1373	21.0759
	0.0548611	0.177331	P38919	IF4A3_HUMAN	EIF4A3	Eukaryotic initiation factor 4A-III	Color2 [DarkGray]	1	4		17.3239	21.1097	19.7422	19.0046	19.1761	19.4632
	0.157037	-0.0628141	P38935	SMBP2_HUMAN	IGHMBP2	DNA-binding protein SMUBP-2	Color2 [DarkGray]	1	4		21.3181	21.0548	21.5325	21.2559	21.3837	21.4543
	1.57912	-0.260234	P39019	RS19_HUMAN	RPS19	Small ribosomal subunit protein eS19	Color2 [DarkGray]	1	4		29.8805	29.7167	29.8679	30.0798	29.9887	30.1772
	0.0680382	-0.0340926	P39023	RL3_HUMAN	RPL3	Large ribosomal subunit protein uL3	Color2 [DarkGray]	1	4		29.4747	29.5138	29.9474	29.7611	29.5045	29.7727
	0.331504	0.848726	P39748	FEN1_HUMAN	FEN1	Flap endonuclease 1	Color2 [DarkGray]	1	4		18.6323	22.167	19.7935	19.6552	19.3414	19.05
	0.484034	1.08605	P40227	TCPZ_HUMAN	CCT6A	T-complex protein 1 subunit zeta	Color2 [DarkGray]	1	4		19.8779	22.6846	19.9141	20.2773	19.2539	19.6871
	0.393629	-0.279486	P40429	RL13A_HUMAN	RPL13A	Large ribosomal subunit protein uL13	Color2 [DarkGray]	1	4		29.8541	28.863	29.564	29.7639	29.5909	29.7648
	0.237176	0.372063	P40939	ECHA_HUMAN	HADHA	Trifunctional enzyme subunit alpha, mitochondrial	Color2 [DarkGray]	1	4		18.3958	20.157	18.435	19.0431	18.4145	18.4141
	0.589334	0.598598	P41091	IF2G_HUMAN	EIF2S3	Eukaryotic translation initiation factor 2 subunit 3	Color2 [DarkGray]	1	4		21.2262	22.7408	21.6561	21.3797	21.2255	21.2222
	0.0927527	0.0994091	P41252	SYIC_HUMAN	IARS1	Isoleucine--tRNA ligase, cytoplasmic	Color2 [DarkGray]	1	4		23.3195	24.3099	23.1763	23.6828	23.5942	23.2305
	1.34378	0.597921	P42285	MTREX_HUMAN	MTREX	Exosome RNA helicase MTR4	Color2 [DarkGray]	1	4		18.1685	18.5489	18.0684	17.9137	17.4018	17.6767
	0.012831	-0.0180581	P42356	PI4KA_HUMAN	PI4KA	Phosphatidylinositol 4-kinase alpha	Color2 [DarkGray]	1	4		19.8762	20.2362	19.1502	20.2028	20.0085	19.1055
	0.683063	-0.686669	P42677	RS27_HUMAN	RPS27	Small ribosomal subunit protein eS27	Color2 [DarkGray]	1	4		28.807	27.5676	28.7528	28.7244	29.0067	29.4563
	0.458292	0.113358	P42696	RBM34_HUMAN	RBM34	RNA-binding protein 34	Color2 [DarkGray]	1	4		19.1901	19.2806	19.4853	19.2262	19.2996	19.09
	0.288223	0.535169	P42704	LPPRC_HUMAN	LRPPRC	Leucine-rich PPR motif-containing protein, mitochondrial	Color2 [DarkGray]	1	4		18.6698	20.9213	18.7197	19.0682	18.7004	18.9366
	0.345232	-0.134074	P42766	RL35_HUMAN	RPL35	Large ribosomal subunit protein uL29	Color2 [DarkGray]	1	4		30.2986	29.8875	30.1203	30.0668	30.4379	30.2039
	0.75814	0.32463	P43121	MUC18_HUMAN	MCAM	Cell surface glycoprotein MUC18	Color2 [DarkGray]	1	4		21.1011	21.3098	20.6845	20.6699	20.8437	20.608
	0.473589	0.461517	P43243	MATR3_HUMAN	MATR3	Matrin-3	Color2 [DarkGray]	1	4		19.8261	20.9638	19.6694	19.5656	19.5978	19.9114
	1.4431	0.659107	P43307	SSRA_HUMAN	SSR1	Translocon-associated protein subunit alpha	Color2 [DarkGray]	1	4		21.3987	21.9725	21.2941	20.9448	20.8696	20.8736
	1.03752	0.231194	P46087;P46087-4	NOP2_HUMAN	NOP2	Probable 28S rRNA (cytosine(4447)-C(5))-methyltransferase	Color2 [DarkGray]	1	4		21.7679	21.7172	21.6648	21.4274	21.3481	21.6808
	0.0450378	-0.026954	P46776	RL27A_HUMAN	RPL27A	Large ribosomal subunit protein uL15	Color2 [DarkGray]	1	4		30.8594	30.1851	30.3749	30.4406	30.4862	30.5734
	0.79539	-0.335401	P46777	RL5_HUMAN	RPL5	Large ribosomal subunit protein uL18	Color2 [DarkGray]	1	4		29.9569	29.6185	30.1432	30.1616	30.086	30.4772
	0.571159	-0.672249	P46778	RL21_HUMAN	RPL21	Large ribosomal subunit protein eL21	Color2 [DarkGray]	1	4		29.2887	27.6352	29.0008	29.294	29.1197	29.5277
	0.793783	-0.243778	P46779	RL28_HUMAN	RPL28	Large ribosomal subunit protein eL28	Color2 [DarkGray]	1	4		29.7298	29.5276	29.8412	29.9149	29.7719	30.1432
	0.635163	-0.205631	P46781	RS9_HUMAN	RPS9	Small ribosomal subunit protein uS4	Color2 [DarkGray]	1	4		29.2536	28.9006	29.386	29.408	29.3987	29.3504
	0.328514	-0.158678	P46782	RS5_HUMAN	RPS5	Small ribosomal subunit protein uS7	Color2 [DarkGray]	1	4		28.6381	28.6653	29.2225	29.0456	29.0687	28.8876
	0.566857	-0.214213	P46783	RS10_HUMAN	RPS10	Small ribosomal subunit protein eS10	Color2 [DarkGray]	1	4		30.5274	29.9932	30.2731	30.5587	30.5306	30.3471
	0.27763	0.466504	P46940	IQGA1_HUMAN	IQGAP1	Ras GTPase-activating-like protein IQGAP1	Color2 [DarkGray]	1	4		20.8633	22.8981	21.0623	21.4397	21.1998	20.7847
	0.447671	0.22979	P46977	STT3A_HUMAN	STT3A	Dolichyl-diphosphooligosaccharide--protein glycosyltransferase subunit STT3A	Color2 [DarkGray]	1	4		20.4368	20.7077	20.0512	20.367	20.1587	19.9807
	0.482547	-0.291545	P47755	CAZA2_HUMAN	CAPZA2	F-actin-capping protein subunit alpha-2	Color2 [DarkGray]	1	4		21.4757	21.3038	20.8531	21.3696	21.8693	21.2683
	0.300271	-0.194836	P47756	CAPZB_HUMAN	CAPZB	F-actin-capping protein subunit beta	Color2 [DarkGray]	1	4		22.8894	23.0019	22.4868	23.2006	23.199	22.5631
	0.468989	0.508652	P47813	IF1AX_HUMAN	EIF1AX	Eukaryotic translation initiation factor 1A, X-chromosomal	Color2 [DarkGray]	1	4		20.5936	22.1575	21.0728	20.7001	20.6713	20.9266
	0.314907	0.333711	P47897;P47897-2	SYQ_HUMAN	QARS1	Glutamine--tRNA ligase	Color2 [DarkGray]	1	4		19.4856	20.7622	19.5457	19.794	19.6245	19.3738
	0.871292	-0.241042	P47914	RL29_HUMAN	RPL29	Large ribosomal subunit protein eL29	Color2 [DarkGray]	1	4		30.2613	30.0983	30.2442	30.4745	30.2239	30.6285
	0.617859	1.3992	P48643	TCPE_HUMAN	CCT5	T-complex protein 1 subunit epsilon	Color2 [DarkGray]	1	4		20.2048	22.9312	19.6657	19.7681	19.4367	19.3994
	1.05687	0.310323	P48651	PTSS1_HUMAN	PTDSS1	Phosphatidylserine synthase 1	Color2 [DarkGray]	1	4		21.7505	21.3483	21.6732	21.2118	21.225	21.4042
	1.06539	1.15292	P49006	MRP_HUMAN	MARCKSL1	MARCKS-related protein	Color2 [DarkGray]	1	4		19.7036	20.8701	19.3677	19.2578	18.7362	18.4886
	1.08783	-0.277915	P49207	RL34_HUMAN	RPL34	Large ribosomal subunit protein eL34	Color2 [DarkGray]	1	4		29.5186	29.215	29.5528	29.7043	29.8011	29.6147
	0.332502	1.04446	P49327	FAS_HUMAN	FASN	Fatty acid synthase	Color2 [DarkGray]	1	4		20.1631	23.3527	19.537	20.9315	19.8839	19.104
	0.294452	0.732306	P49368	TCPG_HUMAN	CCT3	T-complex protein 1 subunit gamma	Color2 [DarkGray]	1	4		19.8672	22.567	19.4328	20.3288	19.8054	19.5359
	1.28982	0.544174	P49711	CTCF_HUMAN	CTCF	Transcriptional repressor CTCF	Color2 [DarkGray]	1	4		19.8246	19.6304	19.9987	19.2782	18.9827	19.5603
	1.1034	2.70191	P49755	TMEDA_HUMAN	TMED10	Transmembrane emp24 domain-containing protein 10	Color2 [DarkGray]	1	4		19.575	20.962	19.2655	16.0318	16.3901	19.2749
	1.07816	-1.10066	P49756	RBM25_HUMAN	RBM25	RNA-binding protein 25	Color2 [DarkGray]	1	4		17.2227	17.8544	18.14	19.2183	18.0479	19.253
	0.895882	-0.714223	P49761;P49761-1	CLK3_HUMAN	CLK3	Dual specificity protein kinase CLK3	Color2 [DarkGray]	1	4		18.3501	18.8818	18.5033	18.7003	19.3121	19.8654
	0.621344	0.178715	P50148	GNAQ_HUMAN	GNAQ	Guanine nucleotide-binding protein G(q) subunit alpha	Color2 [DarkGray]	1	4		22.1806	22.1685	21.8798	21.804	22.0653	21.8235
	0.740845	0.286195	P50416	CPT1A_HUMAN	CPT1A	Carnitine O-palmitoyltransferase 1, liver isoform	Color2 [DarkGray]	1	4		20.271	20.6296	20.0747	20.1804	19.9626	19.9738
	0.0132241	-0.0542774	P50579	MAP2_HUMAN	METAP2	Methionine aminopeptidase 2	Color2 [DarkGray]	1	4		15.7085	20.3999	18.1714	18.2843	18.1317	18.0267
	0.376816	-0.10661	P50914	RL14_HUMAN	RPL14	Large ribosomal subunit protein eL14	Color2 [DarkGray]	1	4		30.1465	30.338	30.1089	30.4153	30.383	30.1149
	0.195688	0.595572	P50990	TCPQ_HUMAN	CCT8	T-complex protein 1 subunit theta	Color2 [DarkGray]	1	4		20.0734	23.2331	19.6475	20.9679	20.2081	19.9913
	0.258206	0.926762	P50991	TCPD_HUMAN	CCT4	T-complex protein 1 subunit delta	Color2 [DarkGray]	1	4		19.9467	23.6741	19.0746	20.4202	19.7858	19.7091
	0.701708	0.588886	P51571	SSRD_HUMAN	SSR4	Translocon-associated protein subunit delta	Color2 [DarkGray]	1	4		19.5772	20.535	19.2909	19.3321	19.217	19.0873
	0.480939	0.870263	P51572;P51572-2	BAP31_HUMAN	BCAP31	B-cell receptor-associated protein 31	Color2 [DarkGray]	1	4		20.3064	21.9665	20.1421	20.523	20.3996	18.8815
	0.293003	0.41271	P51648;P51648-2	AL3A2_HUMAN	ALDH3A2	Aldehyde dehydrogenase family 3 member A2	Color2 [DarkGray]	1	4		18.6241	19.829	17.8762	18.4375	18.3562	18.2975
	1.11316	1.54939	P51991;P51991-2	ROA3_HUMAN	HNRNPA3	Heterogeneous nuclear ribonucleoprotein A3	Color2 [DarkGray]	1	4		18.7021	20.6528	20.5119	18.0763	18.429	18.7133
	0.820981	0.0873216	P52272;P52272-2	HNRPM_HUMAN	HNRNPM	Heterogeneous nuclear ribonucleoprotein M	Color2 [DarkGray]	1	4		24.0608	24.1043	23.9643	23.9094	23.956	24.0021
	0.147666	0.239887	P52292	IMA1_HUMAN	KPNA2	Importin subunit alpha-1	Color2 [DarkGray]	1	4		18.6529	20.4977	18.7249	19.0488	18.9864	19.1207
	0.270027	0.391811	P52597	HNRPF_HUMAN	HNRNPF	Heterogeneous nuclear ribonucleoprotein F	Color2 [DarkGray]	1	4		21.6047	23.3927	21.7287	21.7185	21.9668	21.8654
	0.234372	0.29104	P52701;P52701-3;P52701-4;P52701-2	MSH6_HUMAN	MSH6	DNA mismatch repair protein Msh6	Color2 [DarkGray]	1	4		17.7306	18.8415	17.5468	18.2131	17.7645	17.2681
	0.855627	-0.31557	P52907	CAZA1_HUMAN	CAPZA1	F-actin-capping protein subunit alpha-1	Color2 [DarkGray]	1	4		22.9066	23.019	22.8101	23.4247	23.3481	22.9097
	0.367554	-0.428917	P52948;P52948-2;P52948-3;P52948-4;P52948-5;P52948-6	NUP98_HUMAN	NUP98	Nuclear pore complex protein Nup98-Nup96	Color2 [DarkGray]	1	4		18.0824	18.987	17.6367	18.9569	18.9381	18.0978
	0.575974	0.779492	P53618	COPB_HUMAN	COPB1	Coatomer subunit beta	Color2 [DarkGray]	1	4		18.904	20.5628	18.8932	19.1293	18.549	18.3431
	1.16082	0.826798	P53621	COPA_HUMAN	COPA	Coatomer subunit alpha	Color2 [DarkGray]	1	4		20.6662	21.7199	20.7927	20.275	20.1466	20.2768
	0.951303	0.395563	P53999	TCP4_HUMAN	SUB1	Activated RNA polymerase II transcriptional coactivator p15	Color2 [DarkGray]	1	4		24.6798	24.8011	25.0355	24.6951	24.4999	24.1348
	0.159059	0.115236	P54136	SYRC_HUMAN	RARS1	Arginine--tRNA ligase, cytoplasmic	Color2 [DarkGray]	1	4		20.4673	21.0614	20.3094	20.6755	20.6097	20.2072
	0.68341	1.17808	P55060;P55060-3	XPO2_HUMAN	CSE1L	Exportin-2	Color2 [DarkGray]	1	4		20.0373	22.4553	20.5655	20.3737	19.696	19.4541
	0.522835	2.5602	P55072	TERA_HUMAN	VCP	Transitional endoplasmic reticulum ATPase	Color2 [DarkGray]	1	4		19.3103	23.0948	18.8462	19.9986	19.0281	14.544
	0.00867978	-0.00284513	P55209;P55209-2	NP1L1_HUMAN	NAP1L1	Nucleosome assembly protein 1-like 1	Color2 [DarkGray]	1	4		24.4104	24.6144	24.2888	24.3672	24.4163	24.5387
	0.620009	0.608033	P55735;P55735-2;P55735-3;P55735-4	SEC13_HUMAN	SEC13	Protein SEC13 homolog	Color2 [DarkGray]	1	4		18.6267	20.0566	19.0889	18.5722	18.4734	18.9024
	0.162537	0.190468	P55769	NH2L1_HUMAN	SNU13	NHP2-like protein 1	Color2 [DarkGray]	1	4		19.6804	19.8322	19.5092	18.9732	19.1379	20.3394
	0.117066	0.176177	P55795	HNRH2_HUMAN	HNRNPH2	Heterogeneous nuclear ribonucleoprotein H2	Color2 [DarkGray]	1	4		18.6262	20.2768	18.8299	18.8965	18.8948	19.4131
	0.95248	0.541857	P55884;P55884-2	EIF3B_HUMAN	EIF3B	Eukaryotic translation initiation factor 3 subunit B	Color2 [DarkGray]	1	4		23.4172	23.5935	23.4181	22.6084	22.7471	23.4476
	0.760256	0.788569	P56182	RRP1_HUMAN	RRP1	Ribosomal RNA processing protein 1 homolog A	Color2 [DarkGray]	1	4		19.5544	19.549	19.4107	19.3564	17.7889	19.0032
	0.168105	0.438127	P56192	SYMC_HUMAN	MARS1	Methionine--tRNA ligase, cytoplasmic	Color2 [DarkGray]	1	4		18.238	20.769	17.8279	18.7833	18.9232	17.8141
	1.89893	-0.390101	P56537	IF6_HUMAN	EIF6	Eukaryotic translation initiation factor 6	Color2 [DarkGray]	1	4		25.8406	25.6716	25.5441	26.1336	26.044	26.049
	1.2836	0.225114	P57088	TMM33_HUMAN	TMEM33	Transmembrane protein 33	Color2 [DarkGray]	1	4		21.9537	22.014	21.9796	21.6838	21.6702	21.9178
	0.184946	0.455559	P57678	GEMI4_HUMAN	GEMIN4	Gem-associated protein 4	Color2 [DarkGray]	1	4		19.3183	19.2182	19.5187	19.9966	17.0352	19.6568
	0.496763	0.972157	P58107	EPIPL_HUMAN	EPPK1	Epiplakin	Color2 [DarkGray]	1	4		18.3895	20.9275	18.459	18.6441	18.0546	18.1608
	0.908591	1.39195	P59190;P59190-2	RAB15_HUMAN	RAB15	Ras-related protein Rab-15	Color2 [DarkGray]	1	4		20.3144	22.1268	19.9426	18.9794	19.7985	19.43
	0.415538	2.02645	P60174;P60174-3	TPIS_HUMAN	TPI1	Triosephosphate isomerase	Color2 [DarkGray]	1	4		17.6241	22.7227	18.4089	19.7737	17.7568	15.146
	0.588752	2.1734	P60468	SC61B_HUMAN	SEC61B	Protein transport protein Sec61 subunit beta	Color2 [DarkGray]	1	4		20.9443	21.0181	21.4843	15.6979	20.7128	20.5158
	1.63706	-0.454956	P60709;P63261	ACTB_HUMAN;ACTG_HUMAN	ACTB;ACTG1	Actin, cytoplasmic 1	Color2 [DarkGray]	1	4		26.9701	26.9835	26.6523	27.4495	27.2967	27.2246
	0.38485	1.00883	P60842	IF4A1_HUMAN	EIF4A1	Eukaryotic initiation factor 4A-I	Color2 [DarkGray]	1	4		20.8263	23.9088	20.6245	21.3528	20.3661	20.6142
	0.842213	-0.273803	P60866;P60866-2	RS20_HUMAN	RPS20	Small ribosomal subunit protein uS10	Color2 [DarkGray]	1	4		29.29	29.1073	29.4546	29.5453	29.3691	29.759
	0.0142636	0.0827134	P60900;P60900-2	PSA6_HUMAN	PSMA6	Proteasome subunit alpha type-6	Color2 [DarkGray]	1	4		19.7278	22.4451	16.0092	20.2137	18.8943	18.8259
	0.868603	4.10774	P60903	S10AA_HUMAN	S100A10	Protein S100-A10	Color2 [DarkGray]	1	4		20.2548	22.7579	19.4287	20.5382	15.5012	14.0787
	0.651819	2.6232	P60953	CDC42_HUMAN	CDC42	Cell division control protein 42 homolog	Color2 [DarkGray]	1	4		20.9696	21.6755	20.925	20.4792	20.2596	14.9617
	0.279553	-0.279135	P61158	ARP3_HUMAN	ACTR3	Actin-related protein 3	Color2 [DarkGray]	1	4		19.2787	20.3272	19.236	20.0472	20.1062	19.5259
	0.193755	-0.236121	P61160	ARP2_HUMAN	ACTR2	Actin-related protein 2	Color2 [DarkGray]	1	4		20.4787	21.6076	20.4449	21.4089	21.285	20.5456
	0.541504	0.764654	P61225	RAP2B_HUMAN	RAP2B	Ras-related protein Rap-2b	Color2 [DarkGray]	1	4		17.8974	17.1297	17.1393	15.4859	17.1609	17.2257
	1.56579	-0.382461	P61247	RS3A_HUMAN	RPS3A	Small ribosomal subunit protein eS1	Color2 [DarkGray]	1	4		29.5628	29.3732	29.6226	29.8	29.8385	30.0676
	0.1669	0.0782433	P61254	RL26_HUMAN	RPL26	Large ribosomal subunit protein uL24	Color2 [DarkGray]	1	4		30.2924	29.7574	29.9331	29.9838	30.0085	29.7559
	0.140299	0.0631364	P61313	RL15_HUMAN	RPL15	Large ribosomal subunit protein eL15	Color2 [DarkGray]	1	4		30.0651	29.899	30.0398	30.0834	30.1093	29.6218
	0.620475	-0.22026	P61353	RL27_HUMAN	RPL27	Large ribosomal subunit protein eL27	Color2 [DarkGray]	1	4		30.1422	29.771	30.309	30.274	30.3199	30.289
	0.494951	-0.251686	P61513	RL37A_HUMAN	RPL37A	Large ribosomal subunit protein eL43	Color2 [DarkGray]	1	4		29.0508	28.4932	29.1877	29.2306	29.0345	29.2217
	0.436911	2.42796	P61604	CH10_HUMAN	HSPE1	10 kDa heat shock protein, mitochondrial	Color2 [DarkGray]	1	4		19.2934	24.932	19.2685	21.1966	18.8617	16.1516
	0.565088	0.140854	P61619	S61A1_HUMAN	SEC61A1	Protein transport protein Sec61 subunit alpha isoform 1	Color2 [DarkGray]	1	4		21.8999	21.6014	21.7878	21.6591	21.7178	21.4897
	0.675776	-0.491657	P61927	RL37_HUMAN	RPL37	Large ribosomal subunit protein eL37	Color2 [DarkGray]	1	4		26.6843	26.9924	26.9586	27.843	26.7714	27.496
	0.167538	0.416728	P61978-2;P61978-3	HNRPK_HUMAN	HNRNPK	Isoform of P61978, Isoform 2 of Heterogeneous nuclear ribonucleoprotein K	Color2 [DarkGray]	1	4		21.7644	24.6854	22.1054	22.6815	22.5239	22.0997
	0.276199	0.827757	P61981	1433G_HUMAN	YWHAG	14-3-3 protein gamma	Color2 [DarkGray]	1	4		19.4034	23.0009	19.5979	20.4148	19.6183	19.4858
	1.2238	0.329785	P62070;P62070-4	RRAS2_HUMAN	RRAS2	Ras-related protein R-Ras2	Color2 [DarkGray]	1	4		20.9609	20.6759	20.5928	20.5206	20.4066	20.313
	0.329743	-0.0844955	P62081	RS7_HUMAN	RPS7	Small ribosomal subunit protein eS7	Color2 [DarkGray]	1	4		29.5047	29.6589	29.4836	29.5812	29.5109	29.8086
	0.719567	-0.273671	P62241	RS8_HUMAN	RPS8	Small ribosomal subunit protein eS8	Color2 [DarkGray]	1	4		29.6512	29.4796	29.573	29.8579	29.545	30.1219
	0.653445	-0.202678	P62244	RS15A_HUMAN	RPS15A	Small ribosomal subunit protein uS8	Color2 [DarkGray]	1	4		28.1826	28.0778	28.3483	28.1817	28.4641	28.571
	0.7699	-0.553544	P62249	RS16_HUMAN	RPS16	Small ribosomal subunit protein uS9	Color2 [DarkGray]	1	4		29.7596	28.9081	29.8505	29.8039	30.0896	30.2853
	0.065502	0.212445	P62258	1433E_HUMAN	YWHAE	14-3-3 protein epsilon	Color2 [DarkGray]	1	4		19.5597	22.599	19.5645	21.3588	19.7652	19.9619
	0.435682	-0.104912	P62263	RS14_HUMAN	RPS14	Small ribosomal subunit protein uS11	Color2 [DarkGray]	1	4		29.8911	29.722	30.0015	29.9393	29.8898	30.1003
	0.994355	-0.288785	P62266	RS23_HUMAN	RPS23	Small ribosomal subunit protein uS12	Color2 [DarkGray]	1	4		29.1314	29.0216	28.958	29.27	29.1401	29.5673
	0.849126	-0.35138	P62269	RS18_HUMAN	RPS18	Small ribosomal subunit protein uS13	Color2 [DarkGray]	1	4		30.1266	29.6821	30.0441	30.0541	30.3329	30.5198
	1.38678	-0.362586	P62273;P62273-2	RS29_HUMAN	RPS29	Small ribosomal subunit protein uS14	Color2 [DarkGray]	1	4		28.2979	28.149	28.0376	28.4115	28.446	28.7148
	0.27825	-0.186989	P62277	RS13_HUMAN	RPS13	Small ribosomal subunit protein uS15	Color2 [DarkGray]	1	4		29.6757	29.1498	29.6633	29.5986	29.3742	30.0771
	1.52312	-0.272111	P62280	RS11_HUMAN	RPS11	Small ribosomal subunit protein uS17	Color2 [DarkGray]	1	4		29.341	29.2743	29.4249	29.5144	29.5901	29.752
	0.0531504	-0.0282192	P62304	RUXE_HUMAN	SNRPE	Small nuclear ribonucleoprotein E	Color2 [DarkGray]	1	4		21.0312	20.9944	21.4672	21.1554	21.3845	21.0376
	0.390895	-0.465237	P62314	SMD1_HUMAN	SNRPD1	Small nuclear ribonucleoprotein Sm D1	Color2 [DarkGray]	1	4		21.5385	22.9539	22.972	22.8632	22.7271	23.2698
	0.196844	0.0869732	P62316;P62316-2	SMD2_HUMAN	SNRPD2	Small nuclear ribonucleoprotein Sm D2	Color2 [DarkGray]	1	4		22.6181	22.4905	22.672	22.4352	22.8143	22.2701
	0.751797	-0.119343	P62318;P62318-2	SMD3_HUMAN	SNRPD3	Small nuclear ribonucleoprotein Sm D3	Color2 [DarkGray]	1	4		23.7111	23.6002	23.7953	23.7352	23.8927	23.8368
	1.76903	-0.236687	P62424	RL7A_HUMAN	RPL7A	Large ribosomal subunit protein eL8	Color2 [DarkGray]	1	4		30.179	29.9959	30.042	30.2741	30.2969	30.3559
	0.996162	-0.285973	P62701	RS4X_HUMAN	RPS4X	Small ribosomal subunit protein eS4, X isoform	Color2 [DarkGray]	1	4		29.3802	29.1258	29.4205	29.3993	29.6789	29.7062
	0.57661	-0.0460644	P62750	RL23A_HUMAN	RPL23A	Large ribosomal subunit protein uL23	Color2 [DarkGray]	1	4		30.3459	30.3413	30.2394	30.3536	30.3688	30.3425
	0.301382	-0.0684484	P62753	RS6_HUMAN	RPS6	Small ribosomal subunit protein eS6	Color2 [DarkGray]	1	4		30.0827	29.9077	30.0986	30.0553	30.0056	30.2334
	0.795042	0.307135	P62805	H4_HUMAN	H4C16	Histone H4	Color2 [DarkGray]	1	4		30.3668	30.6634	30.4639	30.0127	30.501	30.059
	1.13638	-0.218253	P62829	RL23_HUMAN	RPL23	Large ribosomal subunit protein uL14	Color2 [DarkGray]	1	4		29.9543	29.6813	29.7364	30.0771	29.9871	29.9625
	0.609066	1.33597	P62834	RAP1A_HUMAN	RAP1A	Ras-related protein Rap-1A	Color2 [DarkGray]	1	4		20.2315	20.4414	19.5529	19.7376	19.633	16.8472
	0.0758117	0.0639795	P62841	RS15_HUMAN	RPS15	Small ribosomal subunit protein uS19	Color2 [DarkGray]	1	4		27.6144	26.9528	27.1554	26.7572	27.5174	27.2561
	1.73294	-0.409762	P62851	RS25_HUMAN	RPS25	Small ribosomal subunit protein eS25	Color2 [DarkGray]	1	4		29.9434	29.6985	29.8061	30.0874	30.2258	30.3641
	1.05614	-0.201551	P62854	RS26_HUMAN	RPS26	Small ribosomal subunit protein eS26	Color2 [DarkGray]	1	4		29.407	29.5978	29.4915	29.8257	29.6942	29.5811
	1.22192	-0.223767	P62857	RS28_HUMAN	RPS28	Small ribosomal subunit protein eS28	Color2 [DarkGray]	1	4		29.0372	29.0135	29.0489	29.3095	29.09	29.3715
	0.723656	-0.553816	P62861	RS30_HUMAN	FAU	Ubiquitin-like FUBI-ribosomal protein eS30 fusion protein	Color2 [DarkGray]	1	4		30.1681	29.4016	29.9259	30.432	29.9012	30.8239
	0.0457058	-0.0300681	P62873	GBB1_HUMAN	GNB1	Guanine nucleotide-binding protein G(I)/G(S)/G(T) subunit beta-1	Color2 [DarkGray]	1	4		23.406	22.6805	22.8427	23.034	23.0715	22.9138
	0.0324049	-0.0169023	P62879	GBB2_HUMAN	GNB2	Guanine nucleotide-binding protein G(I)/G(S)/G(T) subunit beta-2	Color2 [DarkGray]	1	4		25.9355	25.4216	25.4357	25.5892	25.7093	25.545
	0.833344	-0.27695	P62888	RL30_HUMAN	RPL30	Large ribosomal subunit protein eL30	Color2 [DarkGray]	1	4		30.0429	29.768	29.9271	30.2093	29.9519	30.4077
	0.421567	-0.248604	P62891;Q59GN2	R39L5_HUMAN;RL39_HUMAN	RPL39;RPL39P5	Large ribosomal subunit protein eL39	Color2 [DarkGray]	1	4		29.6719	28.934	29.4329	29.8256	29.39	29.5692
	0.609027	-0.540582	P62899	RL31_HUMAN	RPL31	Large ribosomal subunit protein eL31	Color2 [DarkGray]	1	4		30.4808	29.2599	30.4116	30.5136	30.607	30.6535
	1.59125	-0.345338	P62906	RL10A_HUMAN	RPL10A	Large ribosomal subunit protein uL1	Color2 [DarkGray]	1	4		29.139	28.9214	29.1986	29.5156	29.3333	29.4462
	0.810284	-0.230851	P62910	RL32_HUMAN	RPL32	Large ribosomal subunit protein eL32	Color2 [DarkGray]	1	4		29.549	29.2384	29.4342	29.6175	29.8131	29.4835
	0.312188	-0.0817464	P62913;P62913-2	RL11_HUMAN	RPL11	Large ribosomal subunit protein uL5	Color2 [DarkGray]	1	4		29.814	29.7657	30.0463	29.8689	29.9238	30.0786
	0.593037	-0.349542	P62917	RL8_HUMAN	RPL8	Large ribosomal subunit protein uL2	Color2 [DarkGray]	1	4		30.3347	30.1596	30.2657	30.5938	30.1598	31.055
	0.0793139	0.435241	P62937	PPIA_HUMAN	PPIA	Peptidyl-prolyl cis-trans isomerase A	Color2 [DarkGray]	1	4		21.3183	26.8373	21.0749	23.5419	22.2759	22.1069
	1.57498	-0.178219	P62979	RS27A_HUMAN	RPS27A	Ubiquitin-ribosomal protein eS31 fusion protein	Color2 [DarkGray]	1	4		27.7406	27.6623	27.7802	27.9794	27.8478	27.8906
	0.386497	0.386997	P62987	RL40_HUMAN	UBA52	Ubiquitin-ribosomal protein eL40 fusion protein	Color2 [DarkGray]	1	4		28.6331	27.1902	28.0507	27.6638	27.5176	27.5315
	1.24218	-0.211146	P62995;P62995-3	TRA2B_HUMAN	TRA2B	Transformer-2 protein homolog beta	Color2 [DarkGray]	1	4		22.2999	22.5542	22.4132	22.6596	22.5718	22.6693
	1.12477	0.306963	P63092;P63092-4;Q5JWF2	GNAS1_HUMAN;GNAS2_HUMAN	GNAS	Isoform of Q5JWF2, Guanine nucleotide-binding protein G(s) subunit alpha isoforms short	Color2 [DarkGray]	1	4		26.7226	26.4905	26.357	26.2896	26.2855	26.0741
	0.517693	0.139375	P63096	GNAI1_HUMAN	GNAI1	Guanine nucleotide-binding protein G(i) subunit alpha-1	Color2 [DarkGray]	1	4		22.7742	22.4967	22.5078	22.3875	22.6046	22.3685
	0.233727	0.877731	P63104	1433Z_HUMAN	YWHAZ	14-3-3 protein zeta/delta	Color2 [DarkGray]	1	4		21.8898	26.0966	21.7528	23.1246	21.9668	22.0146
	0.410292	-1.72862	P63151;P63151-2	2ABA_HUMAN	PPP2R2A	Serine/threonine-protein phosphatase 2A 55 kDa regulatory subunit B alpha isoform	Color2 [DarkGray]	1	4		14.5322	20.4778	16.0874	19.1227	18.528	18.6327
	0.207924	0.208921	P63167	DYL1_HUMAN	DYNLL1	Dynein light chain 1, cytoplasmic	Color2 [DarkGray]	1	4		19.7898	20.7417	19.7332	20.2632	19.5392	19.8356
	1.71325	-0.368666	P63173	RL38_HUMAN	RPL38	Large ribosomal subunit protein eL38	Color2 [DarkGray]	1	4		29.5186	29.2831	29.5793	29.8293	29.7658	29.8919
	0.914836	1.07995	P63208	SKP1_HUMAN	SKP1	S-phase kinase-associated protein 1	Color2 [DarkGray]	1	4		18.4137	20.1529	18.8127	18.2367	18.1845	17.7182
	0.480924	-0.147739	P63220	RS21_HUMAN	RPS21	Small ribosomal subunit protein eS21	Color2 [DarkGray]	1	4		29.1256	28.9186	29.3515	29.3276	29.1861	29.3253
	0.381392	1.26216	P63241;P63241-2	IF5A1_HUMAN	EIF5A	Eukaryotic translation initiation factor 5A-1	Color2 [DarkGray]	1	4		21.1622	25.1413	20.9893	21.7748	20.7547	20.9767
	1.3297	-0.581538	P63244	RACK1_HUMAN	RACK1	Small ribosomal subunit protein RACK1	Color2 [DarkGray]	1	4		29.096	28.6909	28.6533	29.2332	29.2618	29.6898
	0.0487382	0.0147476	P67809	YBOX1_HUMAN	YBX1	Y-box-binding protein 1	Color2 [DarkGray]	1	4		25.2892	25.577	25.49	25.5552	25.3884	25.3684
	1.0238	-1.23614	P67936	TPM4_HUMAN	TPM4	Tropomyosin alpha-4 chain	Color2 [DarkGray]	1	4		21.8165	22.8637	21.4377	23.8023	23.4704	22.5536
	0.2895	0.52769	P68104;Q5VTE0	EF1A1_HUMAN;EF1A3_HUMAN	EEF1A1;EEF1A1P5	Elongation factor 1-alpha 1	Color2 [DarkGray]	1	4		24.7522	27.0114	25.0703	25.4242	25.1279	24.6987
	1.15378	-0.348235	P68133	ACTS_HUMAN	ACTA1	Actin, alpha skeletal muscle	Color2 [DarkGray]	1	4		29.8572	29.7449	29.6068	30.1149	30.2791	29.8595
	0.223203	0.313864	P68366;P68366-2	TBA4A_HUMAN	TUBA4A	Tubulin alpha-4A chain	Color2 [DarkGray]	1	4		22.1925	23.7355	22.2412	22.8071	22.3373	22.0832
	0.316014	0.409983	P68371	TBB4B_HUMAN	TUBB4B	Tubulin beta-4B chain	Color2 [DarkGray]	1	4		22.5762	24.0648	22.4012	22.7087	22.5122	22.5914
	0.0372572	-0.00889842	P68431	H31_HUMAN	H3C12	Histone H3.1	Color2 [DarkGray]	1	4		24.7499	24.5685	24.5626	24.6979	24.6788	24.5311
	0.649208	0.682093	P78344	IF4G2_HUMAN	EIF4G2	Eukaryotic translation initiation factor 4 gamma 2	Color2 [DarkGray]	1	4		19.3151	20.1412	18.7822	18.2425	18.8045	19.1452
	0.412891	-0.281813	P78362;P78362-2	SRPK2_HUMAN	SRPK2	SRSF protein kinase 2	Color2 [DarkGray]	1	4		20.1487	20.273	20.4053	20.3074	20.2475	21.1175
	0.452087	1.38593	P78371	TCPB_HUMAN	CCT2	T-complex protein 1 subunit beta	Color2 [DarkGray]	1	4		19.6166	23.2534	19.5424	20.3813	19.121	18.7523
	0.291648	-0.946407	P78406	RAE1L_HUMAN	RAE1	mRNA export factor RAE1	Color2 [DarkGray]	1	4		15.4663	15.1249	18.3095	18.0088	15.5697	18.1615
	0.376359	0.309486	P78527;P78527-2	PRKDC_HUMAN	PRKDC	DNA-dependent protein kinase catalytic subunit	Color2 [DarkGray]	1	4		19.6852	20.664	19.679	19.9176	19.5807	19.6014
	0.907034	0.538857	P79522;P79522-2	PRR3_HUMAN	PRR3	Proline-rich protein 3	Color2 [DarkGray]	1	4		19.0921	18.7165	19.245	18.2346	18.2668	18.9357
	1.14793	0.564526	P80723	BASP1_HUMAN	BASP1	Brain acid soluble protein 1	Color2 [DarkGray]	1	4		25.4932	25.2609	25.0065	24.7825	24.9499	24.3346
	0.399977	0.515041	P81605	DCD_HUMAN	DCD	Dermcidin	Color2 [DarkGray]	1	4		24.5847	23.509	24.5317	23.5367	23.0612	24.4823
	0.873153	-2.22693	P82675	RT05_HUMAN	MRPS5	Small ribosomal subunit protein uS5m	Color2 [DarkGray]	1	4		18.5289	18.6909	15.0849	19.3389	19.8584	19.7882
	0.182436	-0.0934683	P82930	RT34_HUMAN	MRPS34	Small ribosomal subunit protein mS34	Color2 [DarkGray]	1	4		20.4306	19.9357	20.459	20.2913	20.5595	20.2549
	1.64725	-0.442469	P83731	RL24_HUMAN	RPL24	Large ribosomal subunit protein eL24	Color2 [DarkGray]	1	4		29.9972	29.7813	29.8999	30.3062	30.1689	30.5307
	0.530089	0.0804399	P83881	RL36A_HUMAN	RPL36A	Large ribosomal subunit protein eL42	Color2 [DarkGray]	1	4		29.028	28.8307	28.8722	28.8666	28.8512	28.7719
	0.802052	-0.233156	P84098	RL19_HUMAN	RPL19	Large ribosomal subunit protein eL19	Color2 [DarkGray]	1	4		30.2063	30.5273	30.3518	30.5223	30.7874	30.4751
	0.636768	0.303041	P84103;P84103-2	SRSF3_HUMAN	SRSF3	Serine/arginine-rich splicing factor 3	Color2 [DarkGray]	1	4		24.9044	25.3364	25.6346	25.0525	24.9751	24.9387
	0.516751	0.719098	P84243	H33_HUMAN	H3-3B	Histone H3.3	Color2 [DarkGray]	1	4		21.3287	21.7864	22.1248	20.1391	22.0777	20.8659
	0.200958	-0.0931028	P98160	PGBM_HUMAN	HSPG2	Basement membrane-specific heparan sulfate proteoglycan core protein	Color2 [DarkGray]	1	4		19.3515	19.2996	19.1822	19.3298	19.0968	19.6861
	0.839722	0.432721	Q00577	PURA_HUMAN	PURA	Transcriptional activator protein Pur-alpha	Color2 [DarkGray]	1	4		20.5294	21.2205	20.6672	20.569	20.1803	20.3697
	0.34383	0.600516	Q00610;Q00610-2	CLH1_HUMAN	CLTC	Clathrin heavy chain 1	Color2 [DarkGray]	1	4		21.1156	22.8345	20.4477	21.1317	20.7343	20.7301
	1.4862	0.483017	Q00839	HNRPU_HUMAN	HNRNPU	Heterogeneous nuclear ribonucleoprotein U	Color2 [DarkGray]	1	4		24.9892	25.1569	25.2461	24.7097	24.3974	24.8361
	1.75798	-0.316895	Q01081	U2AF1_HUMAN	U2AF1	Splicing factor U2AF 35 kDa subunit	Color2 [DarkGray]	1	4		23.7188	23.9049	23.8887	24.2634	24.0851	24.1147
	1.04343	1.12973	Q01082	SPTB2_HUMAN	SPTBN1	Spectrin beta chain, non-erythrocytic 1	Color2 [DarkGray]	1	4		19.5611	21.0299	19.5277	19.1412	18.7917	18.7966
	0.133525	-0.849908	Q01105-2	SET_HUMAN	SET	Isoform of Q01105, Isoform 2 of Protein SET	Color2 [DarkGray]	1	4		19.1332	24.0267	15.9934	20.8082	20.2079	20.687
	0.531357	-0.309656	Q01130	SRSF2_HUMAN	SRSF2	Serine/arginine-rich splicing factor 2	Color2 [DarkGray]	1	4		24.2795	24.7416	24.6054	25.2412	24.4909	24.8234
	0.351429	0.506508	Q01650	LAT1_HUMAN	SLC7A5	Large neutral amino acids transporter small subunit 1	Color2 [DarkGray]	1	4		22.2795	24.0993	22.3635	22.5435	22.4189	22.2604
	1.06144	2.57199	Q01780	EXOSX_HUMAN	EXOSC10	Exosome component 10	Color2 [DarkGray]	1	4		18.7519	18.0459	18.6563	13.7999	16.3403	17.598
	0.654876	0.428087	Q01813	PFKAP_HUMAN	PFKP	ATP-dependent 6-phosphofructokinase, platelet type	Color2 [DarkGray]	1	4		20.5774	21.409	20.7273	20.7403	20.2271	20.4621
	0.428722	1.36767	Q01831	XPC_HUMAN	XPC	DNA repair protein complementing XP-C cells	Color2 [DarkGray]	1	4		18.4182	19.0589	19.2633	18.847	14.8669	18.9235
	0.885558	-0.333831	Q02241-2	KIF23_HUMAN	KIF23	Isoform of Q02241, Isoform 2 of Kinesin-like protein KIF23	Color2 [DarkGray]	1	4		20.3232	20.1111	20.6369	20.7702	20.785	20.5175
	0.51329	1.23952	Q02413	DSG1_HUMAN	DSG1	Desmoglein-1	Color2 [DarkGray]	1	4		23.0851	20.0572	21.1869	21.1879	19.1682	20.2546
	0.558829	-0.398742	Q02543	RL18A_HUMAN	RPL18A	Large ribosomal subunit protein eL20	Color2 [DarkGray]	1	4		29.8043	28.8791	29.8334	29.901	29.8295	29.9826
	1.09547	-0.147583	Q02878	RL6_HUMAN	RPL6	Large ribosomal subunit protein eL6	Color2 [DarkGray]	1	4		29.958	29.7819	29.9779	30.0616	30.0308	30.068
	1.1773	1.13432	Q02880;Q02880-2	TOP2B_HUMAN	TOP2B	DNA topoisomerase 2-beta	Color2 [DarkGray]	1	4		19.5771	19.4712	19.2679	18.1591	17.6187	19.1354
	0.240795	0.34539	Q04637;Q04637-3;Q04637-4;Q04637-5;Q04637-9;Q04637-8	IF4G1_HUMAN	EIF4G1	Eukaryotic translation initiation factor 4 gamma 1	Color2 [DarkGray]	1	4		20.069	21.8293	20.2918	20.5064	20.4962	20.1513
	0.596677	2.12264	Q04695	K1C17_HUMAN	KRT17	Keratin, type I cytoskeletal 17	Color2 [DarkGray]	1	4		21.281	21.3624	20.0321	20.6264	19.951	15.7302
	1.04161	1.10648	Q06210;Q06210-2	GFPT1_HUMAN	GFPT1	Glutamine--fructose-6-phosphate aminotransferase [isomerizing] 1	Color2 [DarkGray]	1	4		19.1419	20.6538	19.7012	19.0496	18.2742	18.8537
	0.461797	1.80277	Q06830	PRDX1_HUMAN	PRDX1	Peroxiredoxin-1	Color2 [DarkGray]	1	4		21.7783	25.9514	21.0795	22.59	20.449	20.362
	0.964465	-0.43316	Q07020	RL18_HUMAN	RPL18	Large ribosomal subunit protein eL18	Color2 [DarkGray]	1	4		29.7644	29.1	29.355	29.8641	29.6863	29.9686
	0.401412	1.5478	Q07021	C1QBP_HUMAN	C1QBP	Complement component 1 Q subcomponent-binding protein, mitochondrial	Color2 [DarkGray]	1	4		20.0871	24.5936	20.275	21.4125	19.9131	18.9868
	1.3168	0.560521	Q07065	CKAP4_HUMAN	CKAP4	Cytoskeleton-associated protein 4	Color2 [DarkGray]	1	4		20.9099	21.2828	20.7498	20.6171	20.4458	20.198
	0.663185	0.565356	Q07666;Q07666-2	KHDR1_HUMAN	KHDRBS1	KH domain-containing, RNA-binding, signal transduction-associated protein 1	Color2 [DarkGray]	1	4		21.4104	22.3289	21.8818	21.5748	21.6035	20.7467
	0.487024	0.283782	Q07955	SRSF1_HUMAN	SRSF1	Serine/arginine-rich splicing factor 1	Color2 [DarkGray]	1	4		22.7037	23.578	23.1818	22.894	22.8892	22.8289
	0.570457	0.33651	Q08211	DHX9_HUMAN	DHX9	ATP-dependent RNA helicase A	Color2 [DarkGray]	1	4		21.3827	21.9506	21.7	21.1725	21.103	21.7483
	0.429326	2.04106	Q08554;Q08554-2	DSC1_HUMAN	DSC1	Desmocollin-1	Color2 [DarkGray]	1	4		21.4697	19.5222	19.2488	20.1891	14.2328	19.6956
	0.334594	0.140914	Q08945	SSRP1_HUMAN	SSRP1	FACT complex subunit SSRP1	Color2 [DarkGray]	1	4		25.5737	25.4904	25.4921	25.1558	25.2623	25.7154
	0.689891	0.602748	Q08J23;Q08J23-2	NSUN2_HUMAN	NSUN2	RNA cytosine C(5)-methyltransferase NSUN2	Color2 [DarkGray]	1	4		20.9339	22.0005	20.7363	20.5736	20.5425	20.7463
	0.110061	0.12137	Q09666	AHNK_HUMAN	AHNAK	Neuroblast differentiation-associated protein AHNAK	Color2 [DarkGray]	1	4		23.3285	24.2185	23.0323	23.6465	23.5137	23.0549
	0.0381325	-0.0164159	Q0ZGT2;Q0ZGT2-4	NEXN_HUMAN	NEXN	Nexilin	Color2 [DarkGray]	1	4		20.6261	20.5348	20.2403	20.5967	20.5443	20.3096
	0.797837	-0.317645	Q12894	IFRD2_HUMAN	IFRD2	Interferon-related developmental regulator 2	Color2 [DarkGray]	1	4		22.33	22.1163	22.6593	22.635	22.869	22.5546
	0.17255	0.264036	Q12904;Q12904-2	AIMP1_HUMAN	AIMP1	Aminoacyl tRNA synthase complex-interacting multifunctional protein 1	Color2 [DarkGray]	1	4		19.6574	20.9291	19.3591	19.9832	20.0933	19.0769
	0.222946	0.286086	Q12905	ILF2_HUMAN	ILF2	Interleukin enhancer-binding factor 2	Color2 [DarkGray]	1	4		20.353	21.7532	20.444	20.9403	20.557	20.1947
	0.342002	0.315121	Q12906	ILF3_HUMAN	ILF3	Interleukin enhancer-binding factor 3	Color2 [DarkGray]	1	4		20.007	21.2248	20.4407	20.4917	20.2102	20.0252
	0.338805	1.24246	Q12931;Q12931-2	TRAP1_HUMAN	TRAP1	Heat shock protein 75 kDa, mitochondrial	Color2 [DarkGray]	1	4		22.2517	26.3459	21.8133	23.1507	21.8056	21.7273
	0.87901	2.69176	Q12986	NFX1_HUMAN	NFX1	Transcriptional repressor NF-X1	Color2 [DarkGray]	1	4		19.8583	19.9372	20.0521	14.4313	18.3527	18.9884
	0.888917	-0.294895	Q13045-2	FLII_HUMAN	FLII	Isoform of Q13045, Isoform 2 of Protein flightless-1 homolog	Color2 [DarkGray]	1	4		20.8758	20.8316	20.6647	21.2395	21.2125	20.8048
	0.247915	0.155492	Q13085;Q13085-4	ACACA_HUMAN	ACACA	Acetyl-CoA carboxylase 1	Color2 [DarkGray]	1	4		24.7733	24.1901	23.9553	24.2261	24.1699	24.0562
	0.966746	2.8896	Q13151	ROA0_HUMAN	HNRNPA0	Heterogeneous nuclear ribonucleoprotein A0	Color2 [DarkGray]	1	4		19.9989	21.2705	21.1925	18.3647	20.0013	15.4271
	0.175851	-0.132867	Q13155;Q13155-2	AIMP2_HUMAN	AIMP2	Aminoacyl tRNA synthase complex-interacting multifunctional protein 2	Color2 [DarkGray]	1	4		19.4912	19.2745	18.6529	19.5482	19.1403	19.1287
	0.0970695	-0.389639	Q13200	PSMD2_HUMAN	PSMD2	26S proteasome non-ATPase regulatory subunit 2	Color2 [DarkGray]	1	4		17.5395	20.317	15.6447	17.6189	17.894	19.1572
	0.244098	0.394555	Q13242	SRSF9_HUMAN	SRSF9	Serine/arginine-rich splicing factor 9	Color2 [DarkGray]	1	4		18.0285	20.1003	18.6054	18.2431	18.8067	18.5008
	0.772085	-0.187367	Q13243;Q13243-3	SRSF5_HUMAN	SRSF5	Serine/arginine-rich splicing factor 5	Color2 [DarkGray]	1	4		23.0835	23.0413	23.3191	23.2552	23.274	23.4766
	1.02139	0.552038	Q13283	G3BP1_HUMAN	G3BP1	Ras GTPase-activating protein-binding protein 1	Color2 [DarkGray]	1	4		22.2008	23.0629	22.5912	21.9898	22.1534	22.0556
	1.3853	0.68998	Q13310-3	PABP4_HUMAN	PABPC4	Isoform of Q13310, Isoform 3 of Polyadenylate-binding protein 4	Color2 [DarkGray]	1	4		24.8352	24.8312	24.429	23.6492	24.0846	24.2917
	1.38975	0.691753	Q13347	EIF3I_HUMAN	EIF3I	Eukaryotic translation initiation factor 3 subunit I	Color2 [DarkGray]	1	4		23.5173	23.8957	23.581	22.7406	22.8059	23.3722
	0.364006	-0.0986468	Q13393;Q13393-2;Q13393-4	PLD1_HUMAN	PLD1	Phospholipase D1	Color2 [DarkGray]	1	4		19.0144	19.1729	18.9347	19.2792	19.1644	18.9743
	0.241319	0.105638	Q13428;Q13428-3;Q13428-4;Q13428-6;Q13428-7	TCOF_HUMAN	TCOF1	Treacle protein	Color2 [DarkGray]	1	4		21.0971	21.2321	21.1516	20.9292	20.8472	21.3876
	0.728171	0.439807	Q13435	SF3B2_HUMAN	SF3B2	Splicing factor 3B subunit 2	Color2 [DarkGray]	1	4		20.3155	21.2164	20.5927	20.1315	20.2866	20.3872
	1.1085	-0.243993	Q13501	SQSTM_HUMAN	SQSTM1	Sequestosome-1	Color2 [DarkGray]	1	4		21.968	21.9982	21.9375	22.2108	22.0357	22.3891
	0.280699	-0.847547	Q13547;Q92769;Q92769-3	HDAC1_HUMAN;HDAC2_HUMAN	HDAC1;HDAC2	Histone deacetylase 1	Color2 [DarkGray]	1	4		15.6365	19.7829	18.2644	18.5715	18.7374	18.9175
	0.26853	0.437254	Q13561;Q13561-2;Q13561-3	DCTN2_HUMAN	DCTN2	Dynactin subunit 2	Color2 [DarkGray]	1	4		18.7106	20.6226	18.9089	19.1247	19.2919	18.5138
	0.0167697	0.0534318	Q13573	SNW1_HUMAN	SNW1	SNW domain-containing protein 1	Color2 [DarkGray]	1	4		15.0721	17.7602	18.4723	17.4769	16.8623	16.8052
	0.196208	0.132974	Q13601	KRR1_HUMAN	KRR1	KRR1 small subunit processome component homolog	Color2 [DarkGray]	1	4		19.9995	19.3122	20.0057	19.5379	19.4985	19.8821
	0.676172	0.100876	Q13610	PWP1_HUMAN	PWP1	Periodic tryptophan protein 1 homolog	Color2 [DarkGray]	1	4		23.7403	23.6623	23.8156	23.5363	23.6974	23.6818
	0.805499	0.289397	Q13724;Q13724-2	MOGS_HUMAN	MOGS	Mannosyl-oligosaccharide glucosidase	Color2 [DarkGray]	1	4		19.7101	20.1886	20.0685	19.8649	19.5982	19.636
	0.940092	1.25024	Q13813;Q13813-2	SPTN1_HUMAN	SPTAN1	Spectrin alpha chain, non-erythrocytic 1	Color2 [DarkGray]	1	4		19.9617	21.5189	19.6587	19.5748	19.0323	18.7815
	0.275777	0.0440547	Q13823	NOG2_HUMAN	GNL2	Nucleolar GTP-binding protein 2	Color2 [DarkGray]	1	4		21.1276	20.958	21.0832	21.0832	21.0056	20.9479
	0.192558	0.163307	Q14008;Q14008-2;Q14008-3	CKAP5_HUMAN	CKAP5	Cytoskeleton-associated protein 5	Color2 [DarkGray]	1	4		18.8644	19.8489	19.0039	19.257	19.0788	18.8916
	0.940275	1.11731	Q14011	CIRBP_HUMAN	CIRBP	Cold-inducible RNA-binding protein	Color2 [DarkGray]	1	4		20.4185	21.6087	22.2457	20.0104	20.4334	20.4772
	0.632165	1.40021	Q14103;Q14103-2;Q14103-3;Q14103-4	HNRPD_HUMAN	HNRNPD	Heterogeneous nuclear ribonucleoprotein D0	Color2 [DarkGray]	1	4		20.7261	23.7624	21.1153	20.8855	20.6157	19.902
	0.872944	2.74345	Q14119	VEZF1_HUMAN	VEZF1	Vascular endothelial zinc finger 1	Color2 [DarkGray]	1	4		18.031	18.1069	19.3835	18.4073	15.217	13.6668
	0.197801	0.0597693	Q14126	DSG2_HUMAN	DSG2	Desmoglein-2	Color2 [DarkGray]	1	4		22.9575	22.6998	22.6745	22.7862	22.7946	22.5715
	0.237926	-0.138721	Q14134;Q14134-2	TRI29_HUMAN	TRIM29	Tripartite motif-containing protein 29	Color2 [DarkGray]	1	4		19.8458	20.3841	20.1083	20.2698	19.9501	20.5343
	0.0515128	-0.0501563	Q14137	BOP1_HUMAN	BOP1	Ribosome biogenesis protein BOP1	Color2 [DarkGray]	1	4		18.6823	18.9766	18.8939	18.2551	19.211	19.2372
	1.22828	0.605538	Q14152	EIF3A_HUMAN	EIF3A	Eukaryotic translation initiation factor 3 subunit A	Color2 [DarkGray]	1	4		23.6091	23.4732	23.6522	22.7819	22.7146	23.4214
	0.91666	0.469818	Q14156;Q14156-2	EFR3A_HUMAN	EFR3A	Protein EFR3 homolog A	Color2 [DarkGray]	1	4		19.8875	19.4296	19.8107	19.4601	19.4034	18.8549
	1.06073	0.302192	Q14160;Q14160-2;Q14160-3	SCRIB_HUMAN	SCRIB	Protein scribble homolog	Color2 [DarkGray]	1	4		17.5609	17.7941	17.6733	17.1477	17.5295	17.4445
	0.122634	-0.239552	Q14203;Q14203-2;Q14203-3;Q14203-4;Q14203-5;Q14203-6	DCTN1_HUMAN	DCTN1	Dynactin subunit 1	Color2 [DarkGray]	1	4		16.7591	18.965	16.9658	17.5661	17.9616	17.8809
	0.107685	0.186526	Q14204	DYHC1_HUMAN	DYNC1H1	Cytoplasmic dynein 1 heavy chain 1	Color2 [DarkGray]	1	4		19.5353	21.1903	19.2315	20.0198	19.8497	19.5281
	1.27765	1.05964	Q14232	EI2BA_HUMAN	EIF2B1	Translation initiation factor eIF-2B subunit alpha	Color2 [DarkGray]	1	4		21.2822	22.0246	21.5583	21.1225	20.5604	20.0033
	0.0714473	0.0791893	Q14247	SRC8_HUMAN	CTTN	Src substrate cortactin	Color2 [DarkGray]	1	4		20.5416	21.4466	20.2418	20.873	20.7207	20.3987
	0.0270797	-0.0157413	Q14254	FLOT2_HUMAN	FLOT2	Flotillin-2	Color2 [DarkGray]	1	4		20.1869	19.7319	19.8276	20.1331	19.9916	19.669
	0.120724	-0.0549227	Q14257;Q14257-2	RCN2_HUMAN	RCN2	Reticulocalbin-2	Color2 [DarkGray]	1	4		22.505	22.8979	22.5228	22.8755	22.7047	22.5102
	0.682664	0.342145	Q14344	GNA13_HUMAN	GNA13	Guanine nucleotide-binding protein subunit alpha-13	Color2 [DarkGray]	1	4		20.3584	19.6656	19.6996	19.5381	19.6316	19.5274
	0.922472	0.814701	Q14444;Q14444-2	CAPR1_HUMAN	CAPRIN1	Caprin-1	Color2 [DarkGray]	1	4		21.5669	22.9145	22.3457	21.5101	21.6627	21.2101
	1.63119	-0.480874	Q14498;Q14498-2	RBM39_HUMAN	RBM39	RNA-binding protein 39	Color2 [DarkGray]	1	4		23.8565	23.6665	23.8746	24.0823	24.2703	24.4876
	1.18057	0.768467	Q14527	HLTF_HUMAN	HLTF	Helicase-like transcription factor	Color2 [DarkGray]	1	4		22.1642	21.8691	21.9084	20.9111	20.9298	21.7954
	1.18936	2.05246	Q14562	DHX8_HUMAN	DHX8	ATP-dependent RNA helicase DHX8	Color2 [DarkGray]	1	4		17.7606	17.5451	17.3923	14.1904	16.967	15.3832
	1.16726	0.596595	Q14694;Q14694-2;Q14694-3	UBP10_HUMAN	USP10	Ubiquitin carboxyl-terminal hydrolase 10	Color2 [DarkGray]	1	4		19.5377	20.1211	19.4351	18.9523	19.0356	19.3162
	1.24881	1.02167	Q14738;Q14738-2;Q14738-3	2A5D_HUMAN	PPP2R5D	Serine/threonine-protein phosphatase 2A 56 kDa regulatory subunit delta isoform	Color2 [DarkGray]	1	4		19.043	20.1671	19.6459	18.8685	18.1951	18.7274
	0.872655	1.76888	Q14739	LBR_HUMAN	LBR	Delta(14)-sterol reductase LBR	Color2 [DarkGray]	1	4		19.1884	19.3129	19.4928	18.7495	18.2301	15.7079
	0.242067	0.51742	Q14974	IMB1_HUMAN	KPNB1	Importin subunit beta-1	Color2 [DarkGray]	1	4		19.4731	21.6889	19.2466	20.2645	19.2928	19.2991
	0.482533	-0.372033	Q14978-3	NOLC1_HUMAN	NOLC1	Isoform of Q14978, Isoform 3 of Nucleolar and coiled-body phosphoprotein 1	Color2 [DarkGray]	1	4		21.8936	21.6619	22.2719	21.8015	22.3593	22.7826
	0.0164363	-0.0060819	Q14978;Q14978-2	NOLC1_HUMAN	NOLC1	Nucleolar and coiled-body phosphoprotein 1	Color2 [DarkGray]	1	4		24.4328	24.3483	24.4338	24.3427	24.247	24.6435
	0.403068	0.841001	Q15014	MO4L2_HUMAN	MORF4L2	Mortality factor 4-like protein 2	Color2 [DarkGray]	1	4		15.5038	16.8375	18.0031	16.9497	15.3073	15.5643
	0.0265575	-0.0637817	Q15019;Q15019-2;Q15019-3	SEPT2_HUMAN	SEPTIN2	Septin-2	Color2 [DarkGray]	1	4		19.1978	21.4229	18.8755	20.0617	19.8484	19.7775
	0.0179765	-0.0495911	Q15021	CND1_HUMAN	NCAPD2	Condensin complex subunit 1	Color2 [DarkGray]	1	4		17.0129	20.1527	18.6745	18.9299	18.512	18.547
	0.13055	-0.0949478	Q15029;Q15029-2;Q15029-3	U5S1_HUMAN	EFTUD2	116 kDa U5 small nuclear ribonucleoprotein component	Color2 [DarkGray]	1	4		18.9806	19.6371	18.9953	19.3773	18.997	19.5235
	0.469074	0.531858	Q15046;Q15046-2	SYK_HUMAN	KARS1	Lysine--tRNA ligase	Color2 [DarkGray]	1	4		19.7135	21.1803	19.9166	19.9644	19.8554	19.395
	0.708702	0.170247	Q15050	RRS1_HUMAN	RRS1	Ribosome biogenesis regulatory protein homolog	Color2 [DarkGray]	1	4		22.1848	22.0403	22.0332	21.7705	21.8748	22.1022
	0.553319	0.0393702	Q15149	PLEC_HUMAN	PLEC	Plectin	Color2 [DarkGray]	1	4		25.3426	25.2771	25.3401	25.2345	25.3073	25.2998
	1.20982	0.425746	Q15149-2	PLEC_HUMAN	PLEC	Isoform of Q15149, Isoform 2 of Plectin	Color2 [DarkGray]	1	4		19.3694	19.4481	19.6501	19.0829	19.3003	18.8071
	0.127011	0.0262082	Q15149-3	PLEC_HUMAN	PLEC	Isoform of Q15149, Isoform 3 of Plectin	Color2 [DarkGray]	1	4		21.0919	20.8359	20.9548	20.9518	20.903	20.9491
	0.42437	1.61838	Q15149-4	PLEC_HUMAN	PLEC	Isoform of Q15149, Isoform 4 of Plectin	Color2 [DarkGray]	1	4		19.6584	19.6844	19.4715	16.9693	15.8192	21.1707
	0.498958	1.54721	Q15149-8	PLEC_HUMAN	PLEC	Isoform of Q15149, Isoform 8 of Plectin	Color2 [DarkGray]	1	4		20.4411	20.6879	20.6403	20.4115	20.3778	16.3384
	1.12298	0.502521	Q15286	RAB35_HUMAN	RAB35	Ras-related protein Rab-35	Color2 [DarkGray]	1	4		21.5113	21.489	20.8964	20.731	20.9185	20.7395
	0.37652	0.73686	Q15293	RCN1_HUMAN	RCN1	Reticulocalbin-1	Color2 [DarkGray]	1	4		20.9995	23.3833	21.1408	21.5978	21.0842	20.631
	0.048369	0.0998961	Q15365	PCBP1_HUMAN	PCBP1	Poly(rC)-binding protein 1	Color2 [DarkGray]	1	4		21.3676	23.4315	21.3236	22.0961	21.6774	22.0495
	0.0136103	-0.0497316	Q15366-3;Q15366-6	PCBP2_HUMAN	PCBP2	Isoform of Q15366, Isoform 3 of Poly(rC)-binding protein 2	Color2 [DarkGray]	1	4		19.8912	23.0524	19.4479	21.6222	20.2005	20.7181
	0.213168	0.153203	Q15370;Q15370-2	ELOB_HUMAN	ELOB	Elongin-B	Color2 [DarkGray]	1	4		19.7367	19.1876	19.656	19.6753	18.9447	19.5008
	0.096409	0.0858059	Q15392;Q15392-2	DHC24_HUMAN	DHCR24	Delta(24)-sterol reductase	Color2 [DarkGray]	1	4		21.4143	22.4985	22.097	21.972	21.8502	21.9303
	0.16841	-0.610479	Q15393	SF3B3_HUMAN	SF3B3	Splicing factor 3B subunit 3	Color2 [DarkGray]	1	4		18.2616	19.8686	15.2967	18.0032	18.3	18.955
	0.226594	0.0768089	Q15397	PUM3_HUMAN	PUM3	Pumilio homolog 3	Color2 [DarkGray]	1	4		20.7507	20.8416	20.5964	20.5098	20.5757	20.8727
	0.465001	1.91479	Q15427	SF3B4_HUMAN	SF3B4	Splicing factor 3B subunit 4	Color2 [DarkGray]	1	4		19.6696	20.6337	20.0909	14.6995	19.941	20.0093
	0.0395562	-0.0135212	Q15477	SKI2_HUMAN	SKIC2	Superkiller complex protein 2	Color2 [DarkGray]	1	4		22.7957	22.456	22.7729	22.6321	22.6712	22.7619
	1.01732	-0.364188	Q15527	SURF2_HUMAN	SURF2	Surfeit locus protein 2	Color2 [DarkGray]	1	4		21.2469	20.899	21.2826	21.3088	21.5046	21.7078
	0.854242	0.34071	Q15629;Q15629-2	TRAM1_HUMAN	TRAM1	Translocating chain-associated membrane protein 1	Color2 [DarkGray]	1	4		19.9439	19.7651	19.9971	19.5697	19.8542	19.2601
	0.849452	-0.465819	Q15633;Q15633-2	TRBP2_HUMAN	TARBP2	RISC-loading complex subunit TARBP2	Color2 [DarkGray]	1	4		18.7239	18.6215	18.5257	19.0991	18.6549	19.5146
	0.0404765	-0.0427125	Q15646;Q15646-3	OASL_HUMAN	OASL	2'-5'-oligoadenylate synthase-like protein	Color2 [DarkGray]	1	4		18.0555	17.0591	17.5839	17.2625	17.5628	18.0013
	1.42992	-0.593667	Q15650	TRIP4_HUMAN	TRIP4	Activating signal cointegrator 1	Color2 [DarkGray]	1	4		21.4328	21.8464	21.6003	22.2984	21.928	22.4341
	0.106708	-0.392691	Q15758	AAAT_HUMAN	SLC1A5	Neutral amino acid transporter B(0)	Color2 [DarkGray]	1	4		17.6739	20.0964	15.8501	19.2667	17.8044	17.7274
	0.25258	0.515033	Q16181;Q16181-2	SEPT7_HUMAN	SEPTIN7	Septin-7	Color2 [DarkGray]	1	4		19.1543	21.3783	19.2328	18.7264	19.9022	19.5916
	0.854942	1.42976	Q16186	ADRM1_HUMAN	ADRM1	Proteasomal ubiquitin receptor ADRM1	Color2 [DarkGray]	1	4		16.0789	18.6111	16.7906	16.0801	15.6778	15.4333
	0.555138	0.322339	Q16540	RM23_HUMAN	MRPL23	Large ribosomal subunit protein uL23m	Color2 [DarkGray]	1	4		18.0868	18.4306	18.9402	18.0425	18.167	18.2811
	0.35869	1.01983	Q16576	RBBP7_HUMAN	RBBP7	Histone-binding protein RBBP7	Color2 [DarkGray]	1	4		19.2628	23.0812	19.908	19.9238	19.5686	19.7001
	1.76974	-0.342264	Q16629;Q16629-2;Q16629-3;Q16629-4	SRSF7_HUMAN	SRSF7	Serine/arginine-rich splicing factor 7	Color2 [DarkGray]	1	4		24.4532	24.4824	24.6424	24.7856	24.825	24.9942
	0.70369	0.48145	Q16630;Q16630-2;Q16630-3	CPSF6_HUMAN	CPSF6	Cleavage and polyadenylation specificity factor subunit 6	Color2 [DarkGray]	1	4		19.505	20.4935	19.9361	19.7146	19.4932	19.2824
	0.781332	-0.75607	Q16637;Q16637-2;Q16637-3;Q16637-4	SMN_HUMAN	SMN2	Survival motor neuron protein	Color2 [DarkGray]	1	4		18.3212	19.7399	19.0425	19.4445	19.8978	20.0295
	0.492524	0.239729	Q16651;Q16651-2	PRSS8_HUMAN	PRSS8	Prostasin	Color2 [DarkGray]	1	4		19.9772	19.8754	19.5881	19.8241	19.6664	19.2311
	1.12785	0.579997	Q16795	NDUA9_HUMAN	NDUFA9	NADH dehydrogenase [ubiquinone] 1 alpha subcomplex subunit 9, mitochondrial	Color2 [DarkGray]	1	4		20.2812	20.8424	20.2	20.1133	19.6613	19.8091
	0.423844	-0.367146	Q1KMD3	HNRL2_HUMAN	HNRNPUL2	Heterogeneous nuclear ribonucleoprotein U-like protein 2	Color2 [DarkGray]	1	4		16.5824	17.3681	17.0375	16.9056	17.2799	17.9039
	0.390495	-0.183428	Q27J81;Q27J81-2	INF2_HUMAN	INF2	Inverted formin-2	Color2 [DarkGray]	1	4		18.8965	18.8745	18.8279	19.3197	19.1634	18.666
	1.32249	-0.509103	Q2NL82	TSR1_HUMAN	TSR1	Pre-rRNA-processing protein TSR1 homolog	Color2 [DarkGray]	1	4		24.1845	24.0489	24.291	24.4202	24.641	24.9906
	0.613425	1.82103	Q2TBE0;Q2TBE0-2;Q2TBE0-3	C19L2_HUMAN	CWF19L2	CWF19-like protein 2	Color2 [DarkGray]	1	4		18.0469	18.5645	19.1659	18.3894	14.2159	17.7088
	0.876586	1.16775	Q32MZ4;Q32MZ4-2;Q32MZ4-3	LRRF1_HUMAN	LRRFIP1	Leucine-rich repeat flightless-interacting protein 1	Color2 [DarkGray]	1	4		20.4642	21.1684	20.1194	18.3915	19.6443	20.2128
	0.264901	0.316305	Q4KMP7	TB10B_HUMAN	TBC1D10B	TBC1 domain family member 10B	Color2 [DarkGray]	1	4		17.9588	17.9407	19.3253	17.8391	18.1612	18.2756
	0.515917	0.129038	Q53EL6;Q53EL6-2	PDCD4_HUMAN	PDCD4	Programmed cell death protein 4	Color2 [DarkGray]	1	4		23.3958	23.3425	23.3119	23.087	23.1437	23.4324
	0.167884	-0.154205	Q53GS9;Q53GS9-2	SNUT2_HUMAN	USP39	U4/U6.U5 tri-snRNP-associated protein 2	Color2 [DarkGray]	1	4		17.4752	18.6505	18.1625	18.2801	18.1302	18.3405
	0.0257149	0.105739	Q53HL2	BOREA_HUMAN	CDCA8	Borealin	Color2 [DarkGray]	1	4		18.5591	15.4465	18.481	15.5491	18.2567	18.3634
	0.573575	-1.07867	Q53TN4;Q53TN4-3	CYBR1_HUMAN	CYBRD1	Plasma membrane ascorbate-dependent reductase CYBRD1	Color2 [DarkGray]	1	4		17.9509	15.3047	16.6568	18.138	17.9711	17.0394
	0.873479	-0.602019	Q562R1	ACTBL_HUMAN	ACTBL2	Beta-actin-like protein 2	Color2 [DarkGray]	1	4		27.265	26.3557	27.0279	27.5264	27.7557	27.1726
	0.0810889	-0.792324	Q58FF8	H90B2_HUMAN	HSP90AB2P	Putative heat shock protein HSP 90-beta 2	Color2 [DarkGray]	1	4		16.0673	24.6441	16.4717	22.3137	21.4112	15.8351
	0.719042	0.216557	Q5BJF2	SGMR2_HUMAN	TMEM97	Sigma intracellular receptor 2	Color2 [DarkGray]	1	4		20.7516	21.2043	21.0315	20.7699	20.7158	20.852
	0.0429365	0.0131582	Q5BKY9;Q5BKY9-2	F133B_HUMAN	FAM133B	Protein FAM133B	Color2 [DarkGray]	1	4		22.4524	22.3693	22.287	22.5245	22.2037	22.3411
	0.582123	0.864112	Q5D862	FILA2_HUMAN	FLG2	Filaggrin-2	Color2 [DarkGray]	1	4		21.8973	20.5068	20.9655	21.2955	19.659	19.8228
	1.52814	-0.553145	Q5JSZ5	PRC2B_HUMAN	PRRC2B	Protein PRRC2B	Color2 [DarkGray]	1	4		20.5303	20.201	20.3596	20.7184	20.8512	21.1807
	0.426337	-0.826997	Q5JVS0;Q5JVS0-2	HABP4_HUMAN	HABP4	Intracellular hyaluronan-binding protein 4	Color2 [DarkGray]	1	4		18.8992	16.5557	19.0968	18.7281	19.1176	19.187
	0.066406	-0.0311572	Q5QJE6	TDIF2_HUMAN	DNTTIP2	Deoxynucleotidyltransferase terminal-interacting protein 2	Color2 [DarkGray]	1	4		17.6098	18.0043	18.1546	17.9374	17.9324	17.9923
	0.988557	-0.541592	Q5SSJ5	HP1B3_HUMAN	HP1BP3	Heterochromatin protein 1-binding protein 3	Color2 [DarkGray]	1	4		21.383	20.5904	21.3144	21.6359	21.5669	21.7098
	1.30648	0.806869	Q5T3I0;Q5T3I0-3	GPTC4_HUMAN	GPATCH4	G patch domain-containing protein 4	Color2 [DarkGray]	1	4		19.1153	19.5338	19.3466	18.5057	18.0798	18.9896
	0.350294	0.116129	Q5T6F2	UBAP2_HUMAN	UBAP2	Ubiquitin-associated protein 2	Color2 [DarkGray]	1	4		19.4951	19.8249	19.4867	19.5495	19.5833	19.3254
	0.86047	0.979786	Q5T749	KPRP_HUMAN	KPRP	Keratinocyte proline-rich protein	Color2 [DarkGray]	1	4		20.8515	19.5281	20.9246	19.9154	19.478	18.9715
	0.754833	1.50549	Q5T8P6-3;Q5T8P6-4;Q5T8P6-5;Q5T8P6;Q5T8P6-2	RBM26_HUMAN	RBM26	RNA-binding protein 26	Color2 [DarkGray]	1	4		16.9922	18.1264	18.4115	17.2977	14.7327	16.9832
	0.58057	-0.257331	Q5TAQ9	DCAF8_HUMAN	DCAF8	DDB1- and CUL4-associated factor 8	Color2 [DarkGray]	1	4		19.0046	19.2838	19.0146	19.4683	19.0154	19.5914
	0.419873	0.12634	Q5TC63;Q5TC63-3	GRTP1_HUMAN	GRTP1	Growth hormone-regulated TBC protein 1	Color2 [DarkGray]	1	4		19.118	19.2246	19.2012	19.2566	19.0793	18.8288
	0.625449	0.258854	Q5TEC6	H37_HUMAN	H3-7	Histone H3-7	Color2 [DarkGray]	1	4		29.7607	29.1528	29.5667	29.2744	29.295	29.1343
	0.501883	0.980728	Q5VSY0;Q5VSY0-2	GKAP1_HUMAN	GKAP1	G kinase-anchoring protein 1	Color2 [DarkGray]	1	4		16.5166	17.0065	17.3203	16.9708	16.5916	14.3388
	0.0160334	-0.0091362	Q5VTL8	PR38B_HUMAN	PRPF38B	Pre-mRNA-splicing factor 38B	Color2 [DarkGray]	1	4		20.3131	19.9059	20.5506	20.2703	20.2353	20.2913
	0.236045	0.145693	Q5VW36	FOCAD_HUMAN	FOCAD	Focadhesin	Color2 [DarkGray]	1	4		18.4304	19.2062	18.8331	18.5582	18.6126	18.8617
	0.322992	0.568906	Q5VYK3	ECM29_HUMAN	ECPAS	Proteasome adapter and scaffold protein ECM29	Color2 [DarkGray]	1	4		18.2085	20.0455	18.4431	18.9464	18.5547	17.4893
	0.0238787	0.0165348	Q659C4	LAR1B_HUMAN	LARP1B	La-related protein 1B	Color2 [DarkGray]	1	4		19.4888	19.0488	19.5984	19.2032	19.2023	19.6809
	1.33734	-0.232946	Q66PJ3-2	AR6P4_HUMAN	ARL6IP4	Isoform of Q66PJ3, Isoform 2 of ADP-ribosylation factor-like protein 6-interacting protein 4	Color2 [DarkGray]	1	4		24.1585	24.1291	24.3269	24.4569	24.5191	24.3374
	0.499079	-0.316805	Q68CQ4	UTP25_HUMAN	UTP25	U3 small nucleolar RNA-associated protein 25 homolog	Color2 [DarkGray]	1	4		18.9783	18.3534	19.2196	19.0815	19.0512	19.369
	0.207673	0.269137	Q68D10;Q68D10-2	SPT2_HUMAN	SPTY2D1	Protein SPT2 homolog	Color2 [DarkGray]	1	4		17.6987	17.5883	17.4734	17.6571	16.3385	17.9573
	0.458841	1.14515	Q69YL0	NCAS2_HUMAN	NCBP2AS2	Protein NCBP2AS2	Color2 [DarkGray]	1	4		18.689	18.4509	19.2456	18.8161	18.5819	15.5521
	0.219451	0.112571	Q6DKI1	RL7L_HUMAN	RPL7L1	Ribosomal protein uL30-like	Color2 [DarkGray]	1	4		22.3055	22.1911	22.6974	22.0412	22.4752	22.3399
	0.0947811	-0.236657	Q6IQ21	ZN770_HUMAN	ZNF770	Zinc finger protein 770	Color2 [DarkGray]	1	4		18.7708	16.3107	19.1206	18.0744	18.3574	18.4802
	0.722056	0.50321	Q6NZI2	CAVN1_HUMAN	CAVIN1	Caveolae-associated protein 1	Color2 [DarkGray]	1	4		19.4802	20.1366	19.0908	19.2428	19.0238	18.9314
	0.0693525	0.161789	Q6P158	DHX57_HUMAN	DHX57	Putative ATP-dependent RNA helicase DHX57	Color2 [DarkGray]	1	4		24.4121	24.5162	22.6774	23.1422	23.1589	24.8191
	1.78095	-0.460572	Q6P1J9	CDC73_HUMAN	CDC73	Parafibromin	Color2 [DarkGray]	1	4		24.0954	23.77	24.1313	24.4283	24.4674	24.4827
	0.218407	-0.0982253	Q6P2Q9	PRP8_HUMAN	PRPF8	Pre-mRNA-processing-splicing factor 8	Color2 [DarkGray]	1	4		19.0186	19.2596	18.9946	19.1676	18.9351	19.4648
	0.83818	-0.267614	Q6P5R6	RL22L_HUMAN	RPL22L1	Ribosomal protein eL22-like	Color2 [DarkGray]	1	4		24.6623	24.7941	24.9391	25.0873	24.8402	25.2707
	0.951178	-0.656281	Q6PGP7	SKI3_HUMAN	SKIC3	Superkiller complex protein 3	Color2 [DarkGray]	1	4		24.3666	23.3866	23.7161	24.5536	24.1974	24.6871
	0.0463341	0.0776526	Q6PK04	CC137_HUMAN	CCDC137	Coiled-coil domain-containing protein 137	Color2 [DarkGray]	1	4		20.4719	19.0219	20.7172	19.787	19.7566	20.4345
	0.705503	-0.186192	Q6PKG0	LARP1_HUMAN	LARP1	La-related protein 1	Color2 [DarkGray]	1	4		26.4035	26.2033	26.4631	26.396	26.5223	26.7101
	1.0114	-1.21701	Q6UUV7;Q6UUV7-3	CRTC3_HUMAN	CRTC3	CREB-regulated transcription coactivator 3	Color2 [DarkGray]	1	4		15.8638	14.7446	14.7989	15.5632	17.0488	16.4464
	0.822693	2.15193	Q6Y7W6;Q6Y7W6-3;Q6Y7W6-4;Q6Y7W6-5	GGYF2_HUMAN	GIGYF2	GRB10-interacting GYF protein 2	Color2 [DarkGray]	1	4		19.5761	19.773	19.4947	15.0543	18.4798	18.8538
	0.335249	-0.199123	Q6YHK3;Q6YHK3-2	CD109_HUMAN	CD109	CD109 antigen	Color2 [DarkGray]	1	4		19.549	18.8879	18.8182	19.3696	19.3513	19.1316
	0.466404	2.60564	Q6ZN66;Q8N8V2;Q96PP9	GBP4_HUMAN;GBP6_HUMAN;GBP7_HUMAN	GBP4;GBP6;GBP7	Guanylate-binding protein 6	Color2 [DarkGray]	1	4		21.588	21.592	21.4552	21.4098	21.3016	14.107
	0.443886	0.162476	Q6ZRV2	FA83H_HUMAN	FAM83H	Protein FAM83H	Color2 [DarkGray]	1	4		17.9712	17.6452	17.5001	17.414	17.5485	17.6666
	1.36674	-0.343486	Q6ZUT1;Q6ZUT1-2;Q6ZUT1-3	NKAP1_HUMAN	NKAPD1	Uncharacterized protein NKAPD1	Color2 [DarkGray]	1	4		20.0538	20.3457	20.111	20.6427	20.5191	20.3791
	0.751373	1.44294	Q71DI3	H32_HUMAN	H3C13	Histone H3.2	Color2 [DarkGray]	1	4		21.9068	21.6963	22.3133	19.2259	22.162	20.1998
	2.14301	-0.276308	Q71UM5	RS27L_HUMAN	RPS27L	Ribosomal protein eS27-like	Color2 [DarkGray]	1	4		26.8128	26.7222	26.6371	27.0403	26.9867	26.9741
	0.898807	1.57616	Q7KZF4	SND1_HUMAN	SND1	Staphylococcal nuclease domain-containing protein 1	Color2 [DarkGray]	1	4		19.9723	22.1186	19.9103	19.7503	18.4456	19.0769
	1.31366	-0.409974	Q7L014	DDX46_HUMAN	DDX46	Probable ATP-dependent RNA helicase DDX46	Color2 [DarkGray]	1	4		21.6526	22.0686	21.9441	22.1638	22.2956	22.4358
	1.33261	-0.221343	Q7L2E3-2	DHX30_HUMAN	DHX30	Isoform of Q7L2E3, Isoform 2 of ATP-dependent RNA helicase DHX30	Color2 [DarkGray]	1	4		23.3615	23.232	23.4182	23.5229	23.4866	23.6661
	0.527541	0.322615	Q7L2H7	EIF3M_HUMAN	EIF3M	Eukaryotic translation initiation factor 3 subunit M	Color2 [DarkGray]	1	4		22.9936	22.8052	22.7968	22.2801	22.2824	23.0653
	0.861586	1.50454	Q7L2J0	MEPCE_HUMAN	MEPCE	7SK snRNA methylphosphate capping enzyme	Color2 [DarkGray]	1	4		19.2266	19.5245	19.803	16.5162	18.3001	19.2243
	1.23874	0.320508	Q7Z2W4	ZCCHV_HUMAN	ZC3HAV1	Zinc finger CCCH-type antiviral protein 1	Color2 [DarkGray]	1	4		22.3804	22.4957	22.4452	21.9745	22.0343	22.351
	1.03471	1.73853	Q7Z460;Q7Z460-2;Q7Z460-3;Q7Z460-4;Q7Z460-5	CLAP1_HUMAN	CLASP1	CLIP-associating protein 1	Color2 [DarkGray]	1	4		16.8052	18.0765	17.1531	14.9964	14.8357	16.9872
	0.0175401	0.00793966	Q7Z4V5	HDGR2_HUMAN	HDGFL2	Hepatoma-derived growth factor-related protein 2	Color2 [DarkGray]	1	4		23.1842	23.4735	23.2673	23.252	23.1151	23.534
	0.759317	1.04927	Q7Z794	K2C1B_HUMAN	KRT77	Keratin, type II cytoskeletal 1b	Color2 [DarkGray]	1	4		19.869	19.6458	20.4788	19.9185	19.0295	17.8979
	1.50602	0.460295	Q86TG7-4	PEG10_HUMAN	PEG10	Isoform of Q86TG7, Isoform 4 of Retrotransposon-derived protein PEG10	Color2 [DarkGray]	1	4		21.1478	21.4675	21.3058	20.9548	20.6326	20.9527
	0.248942	-0.125918	Q86U38;Q86U38-2	NOP9_HUMAN	NOP9	Nucleolar protein 9	Color2 [DarkGray]	1	4		17.8627	18.4031	18.3319	18.4767	18.3795	18.1192
	0.677844	0.274701	Q86UP2;Q86UP2-2;Q86UP2-4	KTN1_HUMAN	KTN1	Kinectin	Color2 [DarkGray]	1	4		19.9306	20.473	20.0226	20.001	19.7369	19.8643
	0.0065518	-0.00493876	Q86UY6	NAA40_HUMAN	NAA40	N-alpha-acetyltransferase 40	Color2 [DarkGray]	1	4		19.7636	19.82	19.9233	19.6216	19.5744	20.3256
	0.941224	0.490288	Q86V81	THOC4_HUMAN	ALYREF	THO complex subunit 4	Color2 [DarkGray]	1	4		25.2365	24.7408	25.3902	24.4926	24.4823	24.9217
	0.0186425	0.0602633	Q86YZ3	HORN_HUMAN	HRNR	Hornerin	Color2 [DarkGray]	1	4		20.9521	20.3656	22.1922	22.945	20.4577	19.9263
	1.59929	0.370326	Q8IUE6	H2A2B_HUMAN	H2AC21	Histone H2A type 2-B	Color2 [DarkGray]	1	4		24.2826	24.433	24.3897	24.0698	24.1171	23.8075
	1.6668	0.356681	Q8IWZ3;Q8IWZ3-4;Q8IWZ3-6	ANKH1_HUMAN	ANKHD1	Ankyrin repeat and KH domain-containing protein 1	Color2 [DarkGray]	1	4		19.9531	19.8772	19.8684	19.5043	19.4035	19.7208
	0.9648	0.168749	Q8IXM3	RM41_HUMAN	MRPL41	Large ribosomal subunit protein mL41	Color2 [DarkGray]	1	4		19.664	19.9049	19.693	19.6094	19.5242	19.622
	0.3382	-0.4556	Q8IY21	DDX60_HUMAN	DDX60	Probable ATP-dependent RNA helicase DDX60	Color2 [DarkGray]	1	4		18.1267	16.586	17.8926	17.8747	17.5692	18.5282
	0.99956	3.45374	Q8IY37	DHX37_HUMAN	DHX37	Probable ATP-dependent RNA helicase DHX37	Color2 [DarkGray]	1	4		20.7394	19.8363	19.7711	14.8217	15.3353	19.8287
	1.4361	-0.112358	Q8IY81	SPB1_HUMAN	FTSJ3	pre-rRNA 2'-O-ribose RNA methyltransferase FTSJ3	Color2 [DarkGray]	1	4		21.5706	21.4763	21.5469	21.6573	21.599	21.6745
	1.56296	-0.528541	Q8IYB3;Q8IYB3-2	SRRM1_HUMAN	SRRM1	Serine/arginine repetitive matrix protein 1	Color2 [DarkGray]	1	4		19.8099	19.8799	19.8844	20.6861	20.1768	20.297
	0.0526069	-0.0488383	Q8IZL8	PELP1_HUMAN	PELP1	Proline-, glutamic acid- and leucine-rich protein 1	Color2 [DarkGray]	1	4		19.0986	18.043	18.718	18.7267	18.7738	18.5056
	0.511105	1.30869	Q8N1N4	K2C78_HUMAN	KRT78	Keratin, type II cytoskeletal 78	Color2 [DarkGray]	1	4		21.4388	18.7279	20.211	20.3762	17.7047	18.3706
	0.115127	-0.298239	Q8N2M8;Q8N2M8-3	CLASR_HUMAN	CLASRP	CLK4-associating serine/arginine rich protein	Color2 [DarkGray]	1	4		16.1263	17.9281	17.2342	15.8408	18.3125	18.0301
	0.914098	0.388676	Q8N3E9	PLCD3_HUMAN	PLCD3	1-phosphatidylinositol 4,5-bisphosphate phosphodiesterase delta-3	Color2 [DarkGray]	1	4		19.8758	19.6474	19.614	19.6617	19.0439	19.2656
	0.397875	0.306409	Q8N531;Q8N531-2	FBXL6_HUMAN	FBXL6	F-box/LRR-repeat protein 6	Color2 [DarkGray]	1	4		19.499	19.0369	19.9722	19.0388	18.9907	19.5594
	1.4446	0.363638	Q8N5K1	CISD2_HUMAN	CISD2	CDGSH iron-sulfur domain-containing protein 2	Color2 [DarkGray]	1	4		19.9128	20.0996	20.2693	19.6486	19.7059	19.8363
	1.83329	-0.420066	Q8N7H5;Q8N7H5-3	PAF1_HUMAN	PAF1	RNA polymerase II-associated factor 1 homolog	Color2 [DarkGray]	1	4		24.575	24.3361	24.5505	24.7734	24.9979	24.9505
	1.89629	-0.219424	Q8N9Q2	SR1IP_HUMAN	SREK1IP1	Protein SREK1IP1	Color2 [DarkGray]	1	4		22.5763	22.4276	22.4317	22.6912	22.6762	22.7264
	1.05589	1.30662	Q8NB90	AFG2A_HUMAN	AFG2A	ATPase family gene 2 protein homolog A	Color2 [DarkGray]	1	4		17.1504	18.1368	17.1277	15.2258	16.4908	16.7785
	0.197412	0.297931	Q8NBI5;Q8NBI5-2	S43A3_HUMAN	SLC43A3	Equilibrative nucleobase transporter 1	Color2 [DarkGray]	1	4		18.704	19.5889	17.6493	18.3379	18.6145	18.0959
	0.671413	-0.137915	Q8NC51	SERB1_HUMAN	SERBP1	SERPINE1 mRNA-binding protein 1	Color2 [DarkGray]	1	4		29.0315	29.0719	29.1827	29.2388	29.3716	29.0894
	0.47654	2.02885	Q8NC56	LEMD2_HUMAN	LEMD2	LEM domain-containing protein 2	Color2 [DarkGray]	1	4		20.5952	19.7486	16.6829	15.7378	19.8022	15.4001
	0.058122	-0.0339642	Q8ND76;Q8ND76-2;Q8ND76-3	CCNY_HUMAN	CCNY	Cyclin-Y	Color2 [DarkGray]	1	4		18.4162	17.8571	18.0015	18.3513	17.9999	18.0254
	1.12055	-0.19987	Q8NDV7-6	TNR6A_HUMAN	TNRC6A	Isoform of Q8NDV7, Isoform 6 of Trinucleotide repeat-containing gene 6A protein	Color2 [DarkGray]	1	4		19.3466	19.3436	19.4081	19.6247	19.4054	19.6677
	0.876364	0.149141	Q8NE71;Q8NE71-2	ABCF1_HUMAN	ABCF1	ATP-binding cassette sub-family F member 1	Color2 [DarkGray]	1	4		23.6915	23.6132	23.8295	23.6097	23.6103	23.4667
	0.0326306	0.497986	Q8NEY8;Q8NEY8-2;Q8NEY8-8;Q8NEY8-9	PPHLN_HUMAN	PPHLN1	Periphilin-1	Color2 [DarkGray]	1	4		16.5778	26.1248	26.1213	26.4068	26.5783	14.3448
	0.71142	0.333057	Q8NHQ9	DDX55_HUMAN	DDX55	ATP-dependent RNA helicase DDX55	Color2 [DarkGray]	1	4		20.7517	20.694	21.0212	20.2985	20.3029	20.8664
	1.3464	-0.315466	Q8TA86	RP9_HUMAN	RP9	Retinitis pigmentosa 9 protein	Color2 [DarkGray]	1	4		21.3812	21.0126	21.2549	21.5137	21.5669	21.5144
	1.58991	-0.164069	Q8TBK6;Q8TBK6-2	ZCH10_HUMAN	ZCCHC10	Zinc finger CCHC domain-containing protein 10	Color2 [DarkGray]	1	4		19.6372	19.4799	19.5886	19.7223	19.7251	19.7505
	1.18802	0.269618	Q8TCJ2	STT3B_HUMAN	STT3B	Dolichyl-diphosphooligosaccharide--protein glycosyltransferase subunit STT3B	Color2 [DarkGray]	1	4		18.8567	18.927	18.7942	18.4099	18.6055	18.7537
	0.634941	0.296522	Q8TCT9;Q8TCT9-5	HM13_HUMAN	HM13	Minor histocompatibility antigen H13	Color2 [DarkGray]	1	4		19.3496	19.9777	19.7102	19.1842	19.5457	19.418
	0.163746	0.0508868	Q8TDD1-2	DDX54_HUMAN	DDX54	Isoform of Q8TDD1, Isoform 2 of ATP-dependent RNA helicase DDX54	Color2 [DarkGray]	1	4		21.1495	21.1849	21.4986	21.2222	21.293	21.1651
	1.02724	1.8418	Q8TDM6;Q8TDM6-4	DLG5_HUMAN	DLG5	Disks large homolog 5	Color2 [DarkGray]	1	4		18.6745	18.721	18.7408	17.2808	15.2514	18.0788
	0.0503775	0.0205275	Q8TDN6	BRX1_HUMAN	BRIX1	Ribosome biogenesis protein BRX1 homolog	Color2 [DarkGray]	1	4		22.9339	22.5922	23.0065	22.9002	22.8592	22.7117
	0.0851886	-0.200761	Q8TEQ6	GEMI5_HUMAN	GEMIN5	Gem-associated protein 5	Color2 [DarkGray]	1	4		16.2675	19.0287	18.1988	18.3484	17.981	17.768
	0.438928	0.214988	Q8WU90	ZC3HF_HUMAN	ZC3H15	Zinc finger CCCH domain-containing protein 15	Color2 [DarkGray]	1	4		20.0997	20.2297	20.6948	20.3146	19.9431	20.1216
	0.208735	0.0844975	Q8WUK0;Q8WUK0-2	PTPM1_HUMAN	PTPMT1	Phosphatidylglycerophosphatase and protein-tyrosine phosphatase 1	Color2 [DarkGray]	1	4		19.5438	19.3025	19.6905	19.6386	19.2779	19.3668
	1.25722	-0.271099	Q8WVC0	LEO1_HUMAN	LEO1	RNA polymerase-associated protein LEO1	Color2 [DarkGray]	1	4		23.7879	23.8317	23.7122	23.9538	23.9529	24.2383
	0.807999	0.356506	Q8WVK2	SNR27_HUMAN	SNRNP27	U4/U6.U5 small nuclear ribonucleoprotein 27 kDa protein	Color2 [DarkGray]	1	4		20.2922	20.3295	20.6443	20.1467	19.7375	20.3123
	0.140723	-0.237722	Q8WVM0	TFB1M_HUMAN	TFB1M	Dimethyladenosine transferase 1, mitochondrial	Color2 [DarkGray]	1	4		16.2933	17.9285	17.8803	17.2456	17.3253	18.2443
	1.32718	0.867226	Q8WWQ0	PHIP_HUMAN	PHIP	PH-interacting protein	Color2 [DarkGray]	1	4		19.4363	19.5056	19.3712	18.9401	18.8025	17.969
	0.167901	-0.252663	Q8WXR4;Q8WXR4-2;Q8WXR4-3;Q8WXR4-4;Q8WXR4-5;Q8WXR4-6;Q8WXR4-7	MYO3B_HUMAN	MYO3B	Myosin-IIIb	Color2 [DarkGray]	1	4		20.6062	18.8876	20.452	20.0345	20.5167	20.1526
	0.576111	1.64253	Q8WY22	BRI3B_HUMAN	BRI3BP	BRI3-binding protein	Color2 [DarkGray]	1	4		18.9632	19.8216	19.6075	19.0658	19.0635	15.3354
	0.162812	-0.0713374	Q92522	H1X_HUMAN	H1-10	Histone H1.10	Color2 [DarkGray]	1	4		24.6824	24.9547	24.487	24.9648	24.7085	24.6648
	0.143917	-0.135995	Q92541	RTF1_HUMAN	RTF1	RNA polymerase-associated protein RTF1 homolog	Color2 [DarkGray]	1	4		18.8477	19.249	18.3747	19.2669	18.4795	19.1329
	1.66096	-0.51575	Q92552;Q92552-2	RT27_HUMAN	MRPS27	Small ribosomal subunit protein mS27	Color2 [DarkGray]	1	4		20.2097	20.194	20.0774	20.5289	20.5534	20.946
	0.983358	0.351578	Q92615	LAR4B_HUMAN	LARP4B	La-related protein 4B	Color2 [DarkGray]	1	4		21.3985	21.531	21.5289	20.9619	20.9839	21.4578
	0.342439	0.378436	Q92616	GCN1_HUMAN	GCN1	Stalled ribosome sensor GCN1	Color2 [DarkGray]	1	4		20.3653	21.6913	20.4577	20.7525	20.4365	20.19
	0.0313826	0.0270411	Q92643;Q92643-2	GPI8_HUMAN	PIGK	GPI-anchor transamidase	Color2 [DarkGray]	1	4		17.8816	18.7761	18.3965	18.398	18.5052	18.07
	0.0656751	-0.0542056	Q92685	ALG3_HUMAN	ALG3	Dol-P-Man:Man(5)GlcNAc(2)-PP-Dol alpha-1,3-mannosyltransferase	Color2 [DarkGray]	1	4		18.7481	18.0279	18.2527	18.1004	18.7606	18.3304
	0.695783	1.44691	Q92734;Q92734-2	TFG_HUMAN	TFG	Protein TFG	Color2 [DarkGray]	1	4		19.3887	22.1881	19.3236	18.7492	19.0108	18.7995
	0.0466602	-0.0755609	Q92900	RENT1_HUMAN	UPF1	Regulator of nonsense transcripts 1	Color2 [DarkGray]	1	4		19.1931	20.3461	18.4917	19.65	19.2358	19.3718
	0.459986	2.07585	Q92974;Q92974-2;Q92974-3	ARHG2_HUMAN	ARHGEF2	Rho guanine nucleotide exchange factor 2	Color2 [DarkGray]	1	4		18.7239	19.6588	19.0318	19.0688	18.9127	13.2054
	0.870877	-0.19243	Q969Q0	RL36L_HUMAN	RPL36AL	Ribosomal protein eL42-like	Color2 [DarkGray]	1	4		29.2789	29.1781	29.2353	29.4576	29.5742	29.2379
	0.422654	-0.0665023	Q969S3	ZN622_HUMAN	ZNF622	Cytoplasmic 60S subunit biogenesis factor ZNF622	Color2 [DarkGray]	1	4		24.8462	24.7909	24.6472	24.777	24.8216	24.8852
	0.120768	-0.452841	Q969X5;Q969X5-2	ERGI1_HUMAN	ERGIC1	Endoplasmic reticulum-Golgi intermediate compartment protein 1	Color2 [DarkGray]	1	4		15.5397	20.1425	18.7329	18.388	18.8399	18.5458
	0.116819	-0.215498	Q96A35	RM24_HUMAN	MRPL24	Large ribosomal subunit protein uL24m	Color2 [DarkGray]	1	4		18.4582	16.4492	18.4103	17.7788	18.1533	18.0321
	0.865015	3.7187	Q96AE4-2	FUBP1_HUMAN	FUBP1	Isoform of Q96AE4, Isoform 2 of Far upstream element-binding protein 1	Color2 [DarkGray]	1	4		18.4174	22.6578	18.7186	19.1119	14.4576	15.0682
	0.153642	0.143572	Q96AG4	LRC59_HUMAN	LRRC59	Leucine-rich repeat-containing protein 59	Color2 [DarkGray]	1	4		24.8958	24.0694	25.2149	24.5586	24.4696	24.7213
	0.0110602	0.00546583	Q96CT7	CC124_HUMAN	CCDC124	Coiled-coil domain-containing protein 124	Color2 [DarkGray]	1	4		23.1618	23.4299	23.2266	23.0324	23.2478	23.5217
	0.122074	0.0735938	Q96D46	NMD3_HUMAN	NMD3	60S ribosomal export protein NMD3	Color2 [DarkGray]	1	4		21.2129	20.5655	21.2237	20.92	20.9882	20.8731
	0.427415	-1.55101	Q96D70	R3HD4_HUMAN	R3HDM4	R3H domain-containing protein 4	Color2 [DarkGray]	1	4		20.3168	15.6195	20.1738	20.4346	19.9413	20.3873
	1.05169	0.562474	Q96DA6;Q96DA6-2	TIM14_HUMAN	DNAJC19	Mitochondrial import inner membrane translocase subunit TIM14	Color2 [DarkGray]	1	4		18.684	19.3948	19.1652	18.53	18.273	18.7537
	0.23249	0.452257	Q96DH6;Q96DH6-2	MSI2H_HUMAN	MSI2	RNA-binding protein Musashi homolog 2	Color2 [DarkGray]	1	4		18.1609	20.434	18.2029	18.7343	18.2567	18.45
	0.692684	0.21803	Q96DV4	RM38_HUMAN	MRPL38	Large ribosomal subunit protein mL38	Color2 [DarkGray]	1	4		19.556	19.7477	19.3069	19.1919	19.4092	19.3554
	0.485373	-1.02097	Q96EK4	THA11_HUMAN	THAP11	THAP domain-containing protein 11	Color2 [DarkGray]	1	4		18.4837	17.4595	15.5792	17.5198	18.5451	18.5205
	1.34479	0.30579	Q96EU6;Q96EU6-2	RRP36_HUMAN	RRP36	Ribosomal RNA processing protein 36 homolog	Color2 [DarkGray]	1	4		21.0631	20.764	21.0062	20.6435	20.5431	20.7294
	0.73593	0.275361	Q96FC9;Q96FC9-2;Q96FC9-3;Q96FC9-4;Q96FC9-5	DDX11_HUMAN	DDX11	ATP-dependent DNA helicase DDX11	Color2 [DarkGray]	1	4		26.6136	26.3085	26.7589	26.4951	26.1318	26.228
	0.47335	2.19435	Q96FS4	SIPA1_HUMAN	SIPA1	Signal-induced proliferation-associated protein 1	Color2 [DarkGray]	1	4		24.3607	24.4057	24.3264	24.1133	24.2449	18.1515
	1.73854	0.503415	Q96G23	CERS2_HUMAN	CERS2	Ceramide synthase 2	Color2 [DarkGray]	1	4		20.7839	21.05	20.7446	20.4683	20.4189	20.181
	0.467019	0.0936406	Q96GQ7	DDX27_HUMAN	DDX27	Probable ATP-dependent RNA helicase DDX27	Color2 [DarkGray]	1	4		19.9427	19.853	19.8397	19.7791	19.6483	19.9271
	0.890774	1.71852	Q96HE9	PRR11_HUMAN	PRR11	Proline-rich protein 11	Color2 [DarkGray]	1	4		17.3097	16.6475	17.8311	15.6765	16.9137	14.0425
	0.856728	0.414803	Q96HV5	TM41A_HUMAN	TMEM41A	Transmembrane protein 41A	Color2 [DarkGray]	1	4		17.3739	18.0113	17.8728	17.4499	17.1083	17.4554
	0.00240034	0.00156085	Q96JP5;Q96JP5-2	ZFP91_HUMAN	ZFP91	E3 ubiquitin-protein ligase ZFP91	Color2 [DarkGray]	1	4		17.4467	17.7437	17.9897	17.4774	17.9729	17.7251
	1.758	0.42489	Q96KA5;Q96KA5-2	CLP1L_HUMAN	CLPTM1L	Lipid scramblase CLPTM1L	Color2 [DarkGray]	1	4		21.3577	21.4061	21.3663	21.1554	20.7887	20.9113
	0.303468	0.846889	Q96KP1	EXOC2_HUMAN	EXOC2	Exocyst complex component 2	Color2 [DarkGray]	1	4		17.4285	17.3017	14.0806	15.0239	16.0078	15.2383
	0.389218	-1.17074	Q96MD7-1	CI085_HUMAN	C9orf85	Isoform of Q96MD7, Isoform 2 of Uncharacterized protein C9orf85	Color2 [DarkGray]	1	4		19.1169	19.4014	15.7858	19.8464	19.7161	18.2538
	1.06795	-0.748528	Q96MU7;Q96MU7-2	YTDC1_HUMAN	YTHDC1	YTH domain-containing protein 1	Color2 [DarkGray]	1	4		18.8254	18.2109	18.4497	19.3388	18.7243	19.6685
	0.808617	-0.161505	Q96N66;Q96N66-2;Q96N66-3	MBOA7_HUMAN	MBOAT7	Lysophospholipid acyltransferase 7	Color2 [DarkGray]	1	4		18.7472	19.0354	18.832	19.0764	19.0589	18.9638
	0.273192	0.561801	Q96P70	IPO9_HUMAN	IPO9	Importin-9	Color2 [DarkGray]	1	4		18.0774	20.4546	17.9432	18.4772	18.0573	18.2552
	1.30901	0.260273	Q96PY5;Q96PY5-3	FMNL2_HUMAN	FMNL2	Formin-like protein 2	Color2 [DarkGray]	1	4		21.0192	20.8036	20.7943	20.7207	20.5263	20.5893
	0.428965	0.517344	Q96QD8	S38A2_HUMAN	SLC38A2	Sodium-coupled neutral amino acid symporter 2	Color2 [DarkGray]	1	4		19.157	20.6916	19.3382	19.5602	19.0923	18.9823
	0.774314	0.381393	Q96RQ3	MCCA_HUMAN	MCCC1	Methylcrotonoyl-CoA carboxylase subunit alpha, mitochondrial	Color2 [DarkGray]	1	4		19.5807	19.4573	19.5905	19.3174	18.7218	19.445
	0.0293179	0.0416317	Q96RT1;Q96RT1-2;Q96RT1-3;Q96RT1-4;Q96RT1-5;Q96RT1-6;Q96RT1-7;Q96RT1-8;Q96RT1-9	ERBIN_HUMAN	ERBIN	Erbin	Color2 [DarkGray]	1	4		18.3771	17.768	17.7009	18.7174	17.2718	17.7319
	0.129089	0.155387	Q96SB4;Q96SB4-3;Q96SB4-4	SRPK1_HUMAN	SRPK1	SRSF protein kinase 1	Color2 [DarkGray]	1	4		20.0868	20.5119	20.6301	19.9686	19.7314	21.0627
	0.0807649	-0.0903231	Q96ST2;Q96ST2-2;Q96ST2-3	IWS1_HUMAN	IWS1	Protein IWS1 homolog	Color2 [DarkGray]	1	4		22.577	22.6268	22.4853	22.2285	22.2937	23.4379
	0.532782	0.484476	Q99459	CDC5L_HUMAN	CDC5L	Cell division cycle 5-like protein	Color2 [DarkGray]	1	4		19.7245	19.8966	20.0272	19.5357	18.6629	19.9964
	0.799526	0.414438	Q99575	POP1_HUMAN	POP1	Ribonucleases P/MRP protein subunit POP1	Color2 [DarkGray]	1	4		21.8375	21.3758	21.9191	21.1485	21.1059	21.6347
	0.0532058	-0.027071	Q99590;Q99590-2	SCAFB_HUMAN	SCAF11	Protein SCAF11	Color2 [DarkGray]	1	4		18.2113	18.4075	17.8992	18.2449	18.0195	18.3348
	1.27159	0.561552	Q99613	EIF3C_HUMAN	EIF3C	Eukaryotic translation initiation factor 3 subunit C	Color2 [DarkGray]	1	4		24.3072	24.5421	24.3304	23.6618	23.616	24.2172
	0.121597	0.0504106	Q99623	PHB2_HUMAN	PHB2	Prohibitin-2	Color2 [DarkGray]	1	4		21.2697	21.597	21.1566	21.4206	21.2868	21.1646
	0.248935	1.20155	Q99714;Q99714-2	HCD2_HUMAN	HSD17B10	3-hydroxyacyl-CoA dehydrogenase type-2	Color2 [DarkGray]	1	4		18.1172	21.9775	17.9391	19.9167	19.0988	15.4137
	0.389046	0.307734	Q99733;Q99733-2	NP1L4_HUMAN	NAP1L4	Nucleosome assembly protein 1-like 4	Color2 [DarkGray]	1	4		20.6791	21.7933	21.023	20.8114	20.8005	20.9603
	0.661566	0.431415	Q99735;Q99735-2	MGST2_HUMAN	MGST2	Microsomal glutathione S-transferase 2	Color2 [DarkGray]	1	4		18.8334	18.6092	18.2088	17.6551	18.3676	18.3345
	0.355023	0.949999	Q99832;Q99832-3	TCPH_HUMAN	CCT7	T-complex protein 1 subunit eta	Color2 [DarkGray]	1	4		20.2587	23.6981	20.826	21.0989	20.8206	20.0134
	0.25949	-0.0688248	Q99848	EBP2_HUMAN	EBNA1BP2	Probable rRNA-processing protein EBP2	Color2 [DarkGray]	1	4		22.2593	22.2019	22.0616	22.33	22.0675	22.3318
	0.0521806	-0.0291341	Q99933;Q99933-2	BAG1_HUMAN	BAG1	BAG family molecular chaperone regulator 1	Color2 [DarkGray]	1	4		20.9129	21.2575	21.1328	20.8711	21.0868	21.4327
	0.777307	2.26271	Q99943	PLCA_HUMAN	AGPAT1	1-acyl-sn-glycerol-3-phosphate acyltransferase alpha	Color2 [DarkGray]	1	4		16.2125	18.9932	18.9131	14.4581	17.6976	15.1751
	0.319067	-0.204821	Q99959-2	PKP2_HUMAN	PKP2	Isoform of Q99959, Isoform 1 of Plakophilin-2	Color2 [DarkGray]	1	4		18.8975	19.2348	18.9948	19.717	18.9032	19.1214
	0.0168368	-0.0146389	Q9BPX5	ARP5L_HUMAN	ARPC5L	Actin-related protein 2/3 complex subunit 5-like protein	Color2 [DarkGray]	1	4		19.5348	19.8954	18.9148	19.3969	19.4731	19.5189
	0.511468	0.287696	Q9BQ39	DDX50_HUMAN	DDX50	ATP-dependent RNA helicase DDX50	Color2 [DarkGray]	1	4		19.4694	19.3964	19.6314	18.9993	18.9512	19.6836
	1.3579	0.759067	Q9BQ75;Q9BQ75-2	CMS1_HUMAN	CMSS1	Protein CMSS1	Color2 [DarkGray]	1	4		20.8694	21.0291	21.0396	20.1434	19.8215	20.696
	0.996257	-0.669076	Q9BQA1	MEP50_HUMAN	WDR77	Methylosome protein WDR77	Color2 [DarkGray]	1	4		21.5479	21.9928	21.2051	21.9919	22.0784	22.6827
	0.388934	-0.474134	Q9BQB6;Q9BQB6-2;Q9BQB6-3	VKOR1_HUMAN	VKORC1	Vitamin K epoxide reductase complex subunit 1	Color2 [DarkGray]	1	4		20.5745	19.0916	20.5621	20.6659	20.7272	20.2576
	0.326379	0.59183	Q9BQE3	TBA1C_HUMAN	TUBA1C	Tubulin alpha-1C chain	Color2 [DarkGray]	1	4		24.6687	26.8181	24.561	24.9907	24.7114	24.5702
	2.2172	0.291178	Q9BQG0;Q9BQG0-2	MBB1A_HUMAN	MYBBP1A	Myb-binding protein 1A	Color2 [DarkGray]	1	4		19.5998	19.5368	19.5907	19.3323	19.1822	19.3393
	0.526888	0.197283	Q9BRJ6	CG050_HUMAN	C7orf50	Uncharacterized protein C7orf50	Color2 [DarkGray]	1	4		25.1675	25.0991	25.4183	25.1598	25.1684	24.7647
	0.402228	-0.185481	Q9BRS2	RIOK1_HUMAN	RIOK1	Serine/threonine-protein kinase RIO1	Color2 [DarkGray]	1	4		22.1646	22.3357	22.1422	22.1443	22.2943	22.7604
	0.0950959	-0.0151087	Q9BRT6	LLPH_HUMAN	LLPH	Protein LLP homolog	Color2 [DarkGray]	1	4		23.0328	22.8597	22.9754	22.9984	22.994	22.9208
	0.472642	-0.979282	Q9BRU9	UTP23_HUMAN	UTP23	rRNA-processing protein UTP23 homolog	Color2 [DarkGray]	1	4		20.9346	18.2879	21.0068	21.2076	21.019	20.9405
	0.737496	0.250544	Q9BRZ2	TRI56_HUMAN	TRIM56	E3 ubiquitin-protein ligase TRIM56	Color2 [DarkGray]	1	4		20.331	20.4329	20.4107	20.0639	19.9237	20.4354
	1.8704	-0.304162	Q9BU76;Q9BU76-4	MMTA2_HUMAN	MMTAG2	Multiple myeloma tumor-associated protein 2	Color2 [DarkGray]	1	4		22.2455	22.1985	22.2099	22.484	22.4233	22.6591
	0.323993	0.639712	Q9BUF5	TBB6_HUMAN	TUBB6	Tubulin beta-6 chain	Color2 [DarkGray]	1	4		23.6795	25.9361	23.3739	23.8065	23.5718	23.692
	1.44684	0.527219	Q9BUJ2;Q9BUJ2-2;Q9BUJ2-4	HNRL1_HUMAN	HNRNPUL1	Heterogeneous nuclear ribonucleoprotein U-like protein 1	Color2 [DarkGray]	1	4		21.4764	21.8622	21.6079	20.9835	21.0084	21.3729
	0.586912	-0.367234	Q9BUQ8	DDX23_HUMAN	DDX23	Probable ATP-dependent RNA helicase DDX23	Color2 [DarkGray]	1	4		19.0878	19.9049	19.066	19.6407	19.7343	19.7854
	0.270384	0.22208	Q9BV38	WDR18_HUMAN	WDR18	WD repeat-containing protein 18	Color2 [DarkGray]	1	4		19.5007	18.9725	19.0798	18.4528	18.9891	19.4449
	1.7425	-0.203258	Q9BVP2;Q9BVP2-2	GNL3_HUMAN	GNL3	Guanine nucleotide-binding protein-like 3	Color2 [DarkGray]	1	4		23.0302	23.0132	23.0296	23.2047	23.1506	23.3274
	1.29898	0.77348	Q9BW60;Q9BW60-2	ELOV1_HUMAN	ELOVL1	Elongation of very long chain fatty acids protein 1	Color2 [DarkGray]	1	4		20.7004	20.7939	20.4203	19.9443	19.3878	20.2619
	1.25977	1.10285	Q9BX40-3	LS14B_HUMAN	LSM14B	Isoform of Q9BX40, Isoform 3 of Protein LSM14 homolog B	Color2 [DarkGray]	1	4		20.0536	20.1401	20.9595	19.1049	18.8871	19.8527
	1.10981	0.373034	Q9BX40;Q9BX40-2	LS14B_HUMAN	LSM14B	Protein LSM14 homolog B	Color2 [DarkGray]	1	4		21.1529	21.2288	21.4952	20.7254	20.8961	21.1363
	0.602991	0.375021	Q9BY77;Q9BY77-2	PDIP3_HUMAN	POLDIP3	Polymerase delta-interacting protein 3	Color2 [DarkGray]	1	4		20.3628	20.0855	20.3592	19.6204	19.6421	20.42
	0.521713	0.127302	Q9BYG3	MK67I_HUMAN	NIFK	MKI67 FHA domain-interacting nucleolar phosphoprotein	Color2 [DarkGray]	1	4		22.1143	21.8915	22.1659	22.0556	21.9041	21.8301
	1.10329	1.44051	Q9BYJ9	YTHD1_HUMAN	YTHDF1	YTH domain-containing family protein 1	Color2 [DarkGray]	1	4		18.4602	19.0791	17.9582	17.3355	16.0495	17.7909
	0.23676	-0.214882	Q9BYN8	RT26_HUMAN	MRPS26	Small ribosomal subunit protein mS26	Color2 [DarkGray]	1	4		18.7561	18.4015	18.6905	19.4467	18.7729	18.273
	0.217495	-0.0308723	Q9BZE4	GTPB4_HUMAN	GTPBP4	GTP-binding protein 4	Color2 [DarkGray]	1	4		23.2909	23.1884	23.378	23.3242	23.323	23.3028
	0.692033	1.63002	Q9C086	IN80B_HUMAN	INO80B	INO80 complex subunit B	Color2 [DarkGray]	1	4		16.2226	16.6106	16.5264	16.9116	14.1515	13.4065
	0.616279	0.221176	Q9C0B5;Q9C0B5-2	ZDHC5_HUMAN	ZDHHC5	Palmitoyltransferase ZDHHC5	Color2 [DarkGray]	1	4		18.4027	18.5789	18.1208	17.9801	18.1673	18.2915
	0.915348	2.37219	Q9GZP8;Q9GZP8-2	IMUP_HUMAN	IMUP	Immortalization up-regulated protein	Color2 [DarkGray]	1	4		20.6216	22.1457	21.338	20.5433	19.6429	16.8025
	0.277872	-0.09629	Q9GZR7	DDX24_HUMAN	DDX24	ATP-dependent RNA helicase DDX24	Color2 [DarkGray]	1	4		21.1047	21.0664	21.1975	21.3391	20.9521	21.3662
	0.986254	-0.224499	Q9GZS3	SKI8_HUMAN	SKIC8	Superkiller complex protein 8	Color2 [DarkGray]	1	4		24.4824	24.3158	24.4626	24.5391	24.5652	24.8299
	0.0328347	0.153301	Q9GZV3	SC5A7_HUMAN	SLC5A7	High affinity choline transporter 1	Color2 [DarkGray]	1	4		19.6844	16.6765	19.0742	19.8	19.4015	15.7737
	1.65758	-0.297124	Q9H089	LSG1_HUMAN	LSG1	Large subunit GTPase 1 homolog	Color2 [DarkGray]	1	4		23.4887	23.3236	23.4199	23.5874	23.7206	23.8155
	0.310321	0.0684236	Q9H0A0	NAT10_HUMAN	NAT10	RNA cytidine acetyltransferase	Color2 [DarkGray]	1	4		21.7911	21.9091	21.9273	21.8453	21.6553	21.9218
	1.35132	0.363775	Q9H0D6	XRN2_HUMAN	XRN2	5'-3' exoribonuclease 2	Color2 [DarkGray]	1	4		20.6252	20.6962	20.9218	20.2814	20.5602	20.3102
	0.788024	-0.204257	Q9H0H5	RGAP1_HUMAN	RACGAP1	Rac GTPase-activating protein 1	Color2 [DarkGray]	1	4		19.8436	19.5239	19.7764	19.8266	20.0551	19.8749
	0.986524	2.58789	Q9H0U3	MAGT1_HUMAN	MAGT1	Magnesium transporter protein 1	Color2 [DarkGray]	1	4		19.4997	19.3636	19.6097	15.7021	19.3584	15.6487
	0.36911	-2.06193	Q9H1E3;Q9H1E3-2	NUCKS_HUMAN	NUCKS1	Nuclear ubiquitous casein and cyclin-dependent kinase substrate 1	Color2 [DarkGray]	1	4		15.4836	23.1878	21.4445	22.2474	22.2466	21.8077
	0.530488	-0.28946	Q9H2M9;Q9H2M9-2	RBGPR_HUMAN	RAB3GAP2	Rab3 GTPase-activating protein non-catalytic subunit	Color2 [DarkGray]	1	4		19.6019	20.1501	19.8519	19.9165	20.5112	20.0446
	0.0691379	-0.12144	Q9H2U1;Q9H2U1-2;Q9H2U1-3	DHX36_HUMAN	DHX36	ATP-dependent DNA/RNA helicase DHX36	Color2 [DarkGray]	1	4		19.4488	19.5733	19.4599	18.9266	19.0824	20.8373
	0.661174	0.360061	Q9H4L4	SENP3_HUMAN	SENP3	Sentrin-specific protease 3	Color2 [DarkGray]	1	4		18.7575	18.857	18.7811	17.9929	18.4853	18.8372
	0.902668	0.547181	Q9H5Q4	TFB2M_HUMAN	TFB2M	Dimethyladenosine transferase 2, mitochondrial	Color2 [DarkGray]	1	4		20.342	20.1484	20.7153	19.9287	19.4268	20.2086
	0.432077	0.183805	Q9H6F5	CCD86_HUMAN	CCDC86	Coiled-coil domain-containing protein 86	Color2 [DarkGray]	1	4		19.3191	18.8829	19.341	19.0034	19.1747	18.8135
	0.188014	0.613771	Q9H6S0	YTDC2_HUMAN	YTHDC2	3'-5' RNA helicase YTHDC2	Color2 [DarkGray]	1	4		21.5653	21.1431	23.5436	20.828	20.142	23.4407
	0.167544	-0.044178	Q9H7B2	RPF2_HUMAN	RPF2	Ribosome production factor 2 homolog	Color2 [DarkGray]	1	4		21.0021	20.7694	21.0721	21.0701	20.9516	20.9545
	0.8819	1.5796	Q9H7E2;Q9H7E2-3	TDRD3_HUMAN	TDRD3	Tudor domain-containing protein 3	Color2 [DarkGray]	1	4		18.559	18.5473	18.7629	15.4085	17.5989	18.123
	1.19213	0.496032	Q9H7E9;Q9H7E9-2	CH033_HUMAN	C8orf33	UPF0488 protein C8orf33	Color2 [DarkGray]	1	4		21.3571	21.5044	21.832	20.7979	21.2318	21.1757
	0.841941	3.28522	Q9H8H2	DDX31_HUMAN	DDX31	Probable ATP-dependent RNA helicase DDX31	Color2 [DarkGray]	1	4		19.1971	19.8647	20.0421	14.5501	14.6974	20.0007
	0.782565	2.06771	Q9H8H3	TMT1A_HUMAN	TMT1A	N6-adenosine-methyltransferase TMT1A	Color2 [DarkGray]	1	4		18.9134	19.8933	19.6222	18.4956	15.0449	18.6852
	2.40286	0.208656	Q9H9L3	I20L2_HUMAN	ISG20L2	Interferon-stimulated 20 kDa exonuclease-like 2	Color2 [DarkGray]	1	4		21.1043	21.1713	21.1409	20.9168	20.8878	20.9859
	0.299109	-0.0577126	Q9HAN9	NMNA1_HUMAN	NMNAT1	Nicotinamide/nicotinic acid mononucleotide adenylyltransferase 1	Color2 [DarkGray]	1	4		21.7188	21.5097	21.6169	21.7283	21.717	21.5732
	0.182129	0.0881125	Q9HAV0	GBB4_HUMAN	GNB4	Guanine nucleotide-binding protein subunit beta-4	Color2 [DarkGray]	1	4		23.9804	23.3758	23.5524	23.5421	23.623	23.4793
	0.230871	0.0718524	Q9HCE1	MOV10_HUMAN	MOV10	Helicase MOV-10	Color2 [DarkGray]	1	4		21.547	21.5622	21.5886	21.2682	21.6843	21.5298
	1.12211	0.203905	Q9NP64;Q9NP64-2;Q9NP64-3	ZCC17_HUMAN	ZCCHC17	Zinc finger CCHC domain-containing protein 17	Color2 [DarkGray]	1	4		22.2461	22.124	22.0462	22.0487	21.8329	21.9229
	0.326612	0.837326	Q9NP97	DLRB1_HUMAN	DYNLRB1	Dynein light chain roadblock-type 1	Color2 [DarkGray]	1	4		17.8695	21.0973	18.3839	18.6163	17.6216	18.6009
	0.473165	-0.162112	Q9NPA8;Q9NPA8-2	ENY2_HUMAN	ENY2	Transcription and mRNA export factor ENY2	Color2 [DarkGray]	1	4		19.8118	20.0433	19.8448	19.9854	19.8858	20.3152
	0.28015	-0.193738	Q9NPE3	NOP10_HUMAN	NOP10	H/ACA ribonucleoprotein complex subunit 3	Color2 [DarkGray]	1	4		18.283	18.5899	17.7428	18.145	18.5267	18.5252
	0.953659	-0.207734	Q9NQ29	LUC7L_HUMAN	LUC7L	Putative RNA-binding protein Luc7-like 1	Color2 [DarkGray]	1	4		22.1115	22.1801	22.3764	22.4569	22.3087	22.5256
	0.406396	-0.0780423	Q9NQ55;Q9NQ55-2;Q9NQ55-3	SSF1_HUMAN	PPAN	Suppressor of SWI4 1 homolog	Color2 [DarkGray]	1	4		19.822	19.8161	19.8368	19.9271	19.7518	20.0301
	0.798174	2.22444	Q9NQC3;Q9NQC3-2;Q9NQC3-5	RTN4_HUMAN	RTN4	Reticulon-4	Color2 [DarkGray]	1	4		18.2656	21.3726	18.643	15.5773	17.6705	18.36
	0.844631	1.56273	Q9NQS7;Q9NQS7-2	INCE_HUMAN	INCENP	Inner centromere protein	Color2 [DarkGray]	1	4		18.9037	19.0341	18.9304	17.9319	15.7129	18.5353
	0.61398	-0.245838	Q9NQX4	MYO5C_HUMAN	MYO5C	Unconventional myosin-Vc	Color2 [DarkGray]	1	4		22.9859	22.4396	22.8208	23.063	23.0826	22.8383
	0.608142	-0.284898	Q9NQZ2	SAS10_HUMAN	UTP3	Something about silencing protein 10	Color2 [DarkGray]	1	4		19.8143	19.3729	19.5995	19.8489	19.6083	20.1842
	1.25179	0.38201	Q9NR30	DDX21_HUMAN	DDX21	Nucleolar RNA helicase 2	Color2 [DarkGray]	1	4		23.6302	23.4943	23.8009	23.1245	23.1717	23.4831
	0.564965	-0.45488	Q9NRW3	ABC3C_HUMAN	APOBEC3C	DNA dC->dU-editing enzyme APOBEC-3C	Color2 [DarkGray]	1	4		18.3579	18.0686	17.179	18.2668	18.2903	18.413
	0.372593	0.246344	Q9NS39	RED2_HUMAN	ADARB2	Double-stranded RNA-specific editase B2	Color2 [DarkGray]	1	4		17.086	17.7688	17.5264	17.1752	16.903	17.5639
	0.834839	0.354506	Q9NSI2;Q9NSI2-2	SLX9_HUMAN	SLX9	Ribosome biogenesis protein SLX9 homolog	Color2 [DarkGray]	1	4		21.3779	21.1033	21.713	20.8907	21.045	21.195
	0.0621671	-0.0319379	Q9NUD5	ZCHC3_HUMAN	ZCCHC3	Zinc finger CCHC domain-containing protein 3	Color2 [DarkGray]	1	4		20.2703	19.6693	19.9388	19.9983	19.9183	20.0576
	0.387974	-0.0935129	Q9NUL3	STAU2_HUMAN	STAU2	Double-stranded RNA-binding protein Staufen homolog 2	Color2 [DarkGray]	1	4		22.834	22.6251	22.7567	22.7263	22.7783	22.9917
	1.01424	0.591754	Q9NUQ6;Q9NUQ6-3;Q9NUQ6-4	SPS2L_HUMAN	SPATS2L	SPATS2-like protein	Color2 [DarkGray]	1	4		24.611	24.5478	24.9086	23.5974	24.3295	24.3652
	0.22212	1.0173	Q9NV06	DCA13_HUMAN	DCAF13	DDB1- and CUL4-associated factor 13	Color2 [DarkGray]	1	4		19.6126	14.9909	19.3	16.5942	18.8064	15.451
	0.0921165	0.109389	Q9NV31	IMP3_HUMAN	IMP3	U3 small nucleolar ribonucleoprotein protein IMP3	Color2 [DarkGray]	1	4		19.5988	19.0843	19.6577	18.9044	19.0086	20.0996
	0.784424	0.440361	Q9NVN8	GNL3L_HUMAN	GNL3L	Guanine nucleotide-binding protein-like 3-like protein	Color2 [DarkGray]	1	4		20.8276	20.5171	20.9175	20.2752	19.938	20.7278
	0.307544	0.212299	Q9NVP1	DDX18_HUMAN	DDX18	ATP-dependent RNA helicase DDX18	Color2 [DarkGray]	1	4		19.9322	19.6317	20.5129	19.6218	19.8122	20.0059
	0.780432	-0.623604	Q9NVP2	ASF1B_HUMAN	ASF1B	Histone chaperone ASF1B	Color2 [DarkGray]	1	4		17.1347	18.0707	17.1582	17.7174	18.1012	18.4158
	0.0675326	0.0437927	Q9NVU7	SDA1_HUMAN	SDAD1	Protein SDA1 homolog	Color2 [DarkGray]	1	4		22.3619	21.7675	22.4552	22.2408	22.1982	22.0142
	0.537229	1.26039	Q9NVX2	NLE1_HUMAN	NLE1	Notchless protein homolog 1	Color2 [DarkGray]	1	4		18.558	19.7461	18.1881	18.8212	15.7711	18.1187
	0.277958	-0.0509504	Q9NW13	RBM28_HUMAN	RBM28	RNA-binding protein 28	Color2 [DarkGray]	1	4		21.7034	21.6626	21.5978	21.6613	21.6183	21.8371
	1.06235	-0.148693	Q9NWB6	ARGL1_HUMAN	ARGLU1	Arginine and glutamate-rich protein 1	Color2 [DarkGray]	1	4		21.817	21.9755	21.9533	22.1191	22.0941	21.9787
	1.49304	0.327522	Q9NWT1	PK1IP_HUMAN	PAK1IP1	p21-activated protein kinase-interacting protein 1	Color2 [DarkGray]	1	4		20.7362	20.9963	21.0107	20.4898	20.6315	20.6393
	0.509806	0.120256	Q9NWU5	RM22_HUMAN	MRPL22	Large ribosomal subunit protein uL22m	Color2 [DarkGray]	1	4		21.5866	21.8515	21.6546	21.591	21.4567	21.6843
	0.0505236	-0.172502	Q9NX05	F120C_HUMAN	FAM120C	Constitutive coactivator of PPAR-gamma-like protein 2	Color2 [DarkGray]	1	4		19.131	15.6742	18.9573	18.1303	17.4987	18.651
	0.743312	-0.294766	Q9NX24	NHP2_HUMAN	NHP2	H/ACA ribonucleoprotein complex subunit 2	Color2 [DarkGray]	1	4		20.8403	20.5996	20.6148	20.8008	20.83	21.3083
	1.00262	-0.328157	Q9NX58	LYAR_HUMAN	LYAR	Cell growth-regulating nucleolar protein	Color2 [DarkGray]	1	4		21.8422	21.3424	21.6868	21.8776	21.9553	22.023
	0.371489	-1.2589	Q9NXE8	CWC25_HUMAN	CWC25	Pre-mRNA-splicing factor CWC25 homolog	Color2 [DarkGray]	1	4		20.1232	15.9035	20.0207	20.487	19.5167	19.8203
	0.442261	-1.1166	Q9NXF1;Q9NXF1-2	TEX10_HUMAN	TEX10	Testis-expressed protein 10	Color2 [DarkGray]	1	4		20.0072	16.594	19.5245	19.4463	19.9385	20.0907
	0.448156	1.14663	Q9NY12;Q9NY12-2	GAR1_HUMAN	GAR1	H/ACA ribonucleoprotein complex subunit 1	Color2 [DarkGray]	1	4		20.9429	20.3503	20.7353	20.5281	17.3582	20.7024
	0.787816	1.50277	Q9NY61	AATF_HUMAN	AATF	Protein AATF	Color2 [DarkGray]	1	4		17.8129	17.5397	17.8496	14.9801	15.7976	17.9162
	1.01154	0.641022	Q9NY93;Q9NY93-2	DDX56_HUMAN	DDX56	Probable ATP-dependent RNA helicase DDX56	Color2 [DarkGray]	1	4		20.2822	19.8995	19.9783	19.3992	18.9452	19.8925
	2.0015	0.363586	Q9NYL2	M3K20_HUMAN	MAP3K20	Mitogen-activated protein kinase kinase kinase 20	Color2 [DarkGray]	1	4		20.954	20.7689	20.757	20.5458	20.3851	20.4581
	0.78721	-0.214471	Q9NYL9	TMOD3_HUMAN	TMOD3	Tropomodulin-3	Color2 [DarkGray]	1	4		22.4275	22.37	22.2481	22.6447	22.7066	22.3377
	0.898776	0.274197	Q9NZI8	IF2B1_HUMAN	IGF2BP1	Insulin-like growth factor 2 mRNA-binding protein 1	Color2 [DarkGray]	1	4		23.9328	23.952	23.9878	23.494	23.5961	23.9599
	0.131867	0.147218	Q9NZM1;Q9NZM1-6	MYOF_HUMAN	MYOF	Myoferlin	Color2 [DarkGray]	1	4		19.2029	20.0166	18.6241	19.2684	19.123	19.0105
	0.0303997	-0.0133063	Q9NZM5	NOP53_HUMAN	NOP53	Ribosome biogenesis protein NOP53	Color2 [DarkGray]	1	4		20.3477	20.3033	20.2603	20.2335	20.118	20.5997
	1.69744	0.376465	Q9P003	CNIH4_HUMAN	CNIH4	Protein cornichon homolog 4	Color2 [DarkGray]	1	4		21.2791	21.1636	20.9521	20.7	20.7589	20.8065
	0.358544	-0.715761	Q9P015	RM15_HUMAN	MRPL15	Large ribosomal subunit protein uL15m	Color2 [DarkGray]	1	4		19.0055	16.5413	19.0254	18.9879	18.6939	19.0376
	0.20201	0.0968157	Q9P031	TAP26_HUMAN	CCDC59	Thyroid transcription factor 1-associated protein 26	Color2 [DarkGray]	1	4		21.4445	21.1589	21.176	21.0043	21.0017	21.483
	0.131239	0.0982304	Q9P035	HACD3_HUMAN	HACD3	Very-long-chain (3R)-3-hydroxyacyl-CoA dehydratase 3	Color2 [DarkGray]	1	4		20.7242	21.043	20.6758	20.435	21.2147	20.4987
	0.281235	0.420928	Q9P258	RCC2_HUMAN	RCC2	Protein RCC2	Color2 [DarkGray]	1	4		20.1504	22.1861	20.8525	20.8047	20.5505	20.571
	0.167194	0.245314	Q9P287;Q9P287-2;Q9P287-3;Q9P287-4	BCCIP_HUMAN	BCCIP	BRCA2 and CDKN1A-interacting protein	Color2 [DarkGray]	1	4		16.9546	17.8418	17.0902	17.4378	16.0964	17.6164
	1.11477	2.87748	Q9P2D0	IBTK_HUMAN	IBTK	Inhibitor of Bruton tyrosine kinase	Color2 [DarkGray]	1	4		18.9884	19.122	19.0451	15.6632	14.3757	18.4842
	1.19663	0.461517	Q9P2E9	RRBP1_HUMAN	RRBP1	Ribosome-binding protein 1	Color2 [DarkGray]	1	4		19.7755	20.1947	19.8407	19.548	19.6484	19.23
	0.0644754	0.127269	Q9P2J5	SYLC_HUMAN	LARS1	Leucine--tRNA ligase, cytoplasmic	Color2 [DarkGray]	1	4		18.8524	20.7929	18.7327	19.5104	19.4763	19.0095
	1.04711	0.965132	Q9UBB4	ATX10_HUMAN	ATXN10	Ataxin-10	Color2 [DarkGray]	1	4		20.6365	21.8055	20.4096	19.9648	19.9636	20.0278
	0.341098	0.126492	Q9UBI6	GBG12_HUMAN	GNG12	Guanine nucleotide-binding protein G(I)/G(S)/G(O) subunit gamma-12	Color2 [DarkGray]	1	4		25.6175	25.4554	25.2874	25.4842	25.4058	25.0908
	0.769881	0.381262	Q9UBM7	DHCR7_HUMAN	DHCR7	7-dehydrocholesterol reductase	Color2 [DarkGray]	1	4		19.6933	19.6582	19.7471	19.671	19.3883	18.8955
	0.761451	0.320569	Q9UBN4;Q9UBN4-2;Q9UBN4-3;Q9UBN4-4;Q9UBN4-5;Q9UBN4-6;Q9UL62	TRPC4_HUMAN;TRPC5_HUMAN	TRPC4;TRPC5	Short transient receptor potential channel 4	Color2 [DarkGray]	1	4		23.4455	22.9687	23.2088	22.8325	23.1456	22.6831
	1.33002	0.734121	Q9UBQ5	EIF3K_HUMAN	EIF3K	Eukaryotic translation initiation factor 3 subunit K	Color2 [DarkGray]	1	4		22.98	23.3669	22.6771	22.0028	22.2497	22.5692
	0.438146	0.88918	Q9UGY1	NOL12_HUMAN	NOL12	Nucleolar protein 12	Color2 [DarkGray]	1	4		19.3456	19.6916	19.659	19.4468	16.9531	19.6288
	0.48301	0.768492	Q9UH99;Q9UH99-2;Q9UH99-3	SUN2_HUMAN	SUN2	SUN domain-containing protein 2	Color2 [DarkGray]	1	4		17.908	18.2123	18.6055	16.1511	18.0933	18.1759
	1.02041	-3.10701	Q9UHA3	RLP24_HUMAN	RSL24D1	Probable ribosome biogenesis protein RLP24	Color2 [DarkGray]	1	4		20.6642	16.3769	16.4238	20.9478	21.18	20.6581
	2.14158	0.388077	Q9UHB9	SRP68_HUMAN	SRP68	Signal recognition particle subunit SRP68	Color2 [DarkGray]	1	4		23.6572	23.6932	23.747	23.2842	23.2015	23.4474
	0.0689066	-0.0984783	Q9UHD8	SEPT9_HUMAN	SEPTIN9	Septin-9	Color2 [DarkGray]	1	4		19.06	20.3328	18.683	19.4791	19.4682	19.424
	0.543063	-0.221525	Q9UHI6	DDX20_HUMAN	DDX20	Probable ATP-dependent RNA helicase DDX20	Color2 [DarkGray]	1	4		19.3118	19.8854	19.4094	19.6915	19.7828	19.7968
	0.934802	-1.02035	Q9UHR5;Q9UHR5-2	S30BP_HUMAN	SAP30BP	SAP30-binding protein	Color2 [DarkGray]	1	4		17.2649	18.3058	17.1226	17.9403	18.678	19.1361
	0.318188	-0.987132	Q9UI30	TR112_HUMAN	TRMT112	Multifunctional methyltransferase subunit TRM112-like protein	Color2 [DarkGray]	1	4		16.0335	20.1772	19.3618	19.3454	19.5273	19.6612
	0.700022	-0.250853	Q9UII4	HERC5_HUMAN	HERC5	E3 ISG15--protein ligase HERC5	Color2 [DarkGray]	1	4		21.4796	20.9845	21.4373	21.502	21.6303	21.5218
	0.0540834	0.0330677	Q9UJV9	DDX41_HUMAN	DDX41	Probable ATP-dependent RNA helicase DDX41	Color2 [DarkGray]	1	4		19.9119	20.1343	20.0214	19.7084	19.8818	20.3782
	0.0246165	0.00781059	Q9UKD2	MRT4_HUMAN	MRTO4	mRNA turnover protein 4 homolog	Color2 [DarkGray]	1	4		24.5181	24.2789	24.5345	24.3106	24.4592	24.5383
	1.14059	0.764636	Q9UKM9;Q9UKM9-2	RALY_HUMAN	RALY	RNA-binding protein Raly	Color2 [DarkGray]	1	4		22.0021	22.5365	21.9046	21.0719	21.2073	21.8702
	0.395023	0.143871	Q9UKS6	PACN3_HUMAN	PACSIN3	Protein kinase C and casein kinase substrate in neurons protein 3	Color2 [DarkGray]	1	4		21.0445	21.0426	20.6821	20.7127	20.9679	20.6571
	0.701999	-0.527403	Q9UKV8	AGO2_HUMAN	AGO2	Protein argonaute-2	Color2 [DarkGray]	1	4		24.0539	24.3161	23.9971	25.1857	24.7103	24.0533
	0.0205244	-0.008365	Q9ULV0	MYO5B_HUMAN	MYO5B	Unconventional myosin-Vb	Color2 [DarkGray]	1	4		20.697	20.2817	20.4493	20.4654	20.6007	20.387
	0.535675	0.408586	Q9UMS4	PRP19_HUMAN	PRPF19	Pre-mRNA-processing factor 19	Color2 [DarkGray]	1	4		20.9252	21.0265	20.6058	20.2561	20.0233	21.0524
	0.213519	-0.830059	Q9UMY1	NOL7_HUMAN	NOL7	Nucleolar protein 7	Color2 [DarkGray]	1	4		21.4056	16.841	21.2617	20.6248	21.0031	20.3706
	1.05204	2.07941	Q9UN81	LORF1_HUMAN	L1RE1	LINE-1 retrotransposable element ORF1 protein	Color2 [DarkGray]	1	4		20.2215	20.2985	19.9901	16.2443	19.0828	18.9448
	0.0998205	0.0564448	Q9UNI6	DUS12_HUMAN	DUSP12	Dual specificity protein phosphatase 12	Color2 [DarkGray]	1	4		18.5131	17.9709	18.0416	17.8984	18.2146	18.2433
	1.66562	0.502903	Q9UNL2;Q9UNL2-2	SSRG_HUMAN	SSR3	Translocon-associated protein subunit gamma	Color2 [DarkGray]	1	4		21.5625	22.0215	21.76	21.3465	21.231	21.2577
	0.334921	-0.331397	Q9UNN8	EPCR_HUMAN	PROCR	Endothelial protein C receptor	Color2 [DarkGray]	1	4		21.8817	20.5137	21.2613	21.4271	21.7512	21.4725
	0.629	0.337219	Q9UNQ0;Q9UNQ0-2	ABCG2_HUMAN	ABCG2	Broad substrate specificity ATP-binding cassette transporter ABCG2	Color2 [DarkGray]	1	4		20.9951	20.8527	20.9392	20.7534	20.8984	20.1236
	0.0904471	0.0173683	Q9UNQ2	DIM1_HUMAN	DIMT1	Probable dimethyladenosine transferase	Color2 [DarkGray]	1	4		22.5178	22.6227	22.5655	22.5114	22.4708	22.6716
	0.424335	-0.411416	Q9UNX3	RL26L_HUMAN	RPL26L1	Ribosomal protein uL24-like	Color2 [DarkGray]	1	4		25.2951	25.2799	26.3123	25.5904	26.3738	26.1573
	0.669351	0.600595	Q9UNZ5	L10K_HUMAN	C19orf53	Leydig cell tumor 10 kDa protein homolog	Color2 [DarkGray]	1	4		21.2901	21.1991	21.0449	19.9875	20.4027	21.3422
	0.535585	1.38908	Q9UPN3;Q9UPN3-5	MACF1_HUMAN	MACF1	Microtubule-actin cross-linking factor 1, isoforms 1/2/3/4/5	Color2 [DarkGray]	1	4		17.7891	18.3804	17.5161	14.2766	17.657	17.5848
	0.639566	0.587671	Q9UPQ9;Q9UPQ9-1;Q9UPQ9-2	TNR6B_HUMAN	TNRC6B	Trinucleotide repeat-containing gene 6B protein	Color2 [DarkGray]	1	4		18.2414	17.8736	17.708	17.708	17.7649	16.5871
	0.577689	0.655032	Q9UQ80	PA2G4_HUMAN	PA2G4	Proliferation-associated protein 2G4	Color2 [DarkGray]	1	4		22.1152	23.5994	22.0553	21.9499	21.9211	21.9338
	0.713396	1.71297	Q9Y221;Q9Y221-2	NIP7_HUMAN	NIP7	60S ribosome subunit biogenesis protein NIP7 homolog	Color2 [DarkGray]	1	4		20.0504	19.9089	20.0679	18.912	16.1664	19.81
	0.734458	0.867002	Q9Y230	RUVB2_HUMAN	RUVBL2	RuvB-like 2	Color2 [DarkGray]	1	4		19.1588	20.7865	19.3536	19.2316	18.8053	18.6611
	1.2123	0.582737	Q9Y262	EIF3L_HUMAN	EIF3L	Eukaryotic translation initiation factor 3 subunit L	Color2 [DarkGray]	1	4		23.7086	23.8392	23.5625	22.86	22.963	23.539
	0.237677	0.444556	Q9Y265	RUVB1_HUMAN	RUVBL1	RuvB-like 1	Color2 [DarkGray]	1	4		19.6473	21.7786	19.6603	20.3019	19.8266	19.624
	0.716304	-0.558264	Q9Y2K2;Q9Y2K2-7;Q9Y2K2-8	SIK3_HUMAN	SIK3	Serine/threonine-protein kinase SIK3	Color2 [DarkGray]	1	4		16.2924	15.5744	16.7956	16.7687	16.7206	16.8479
	0.0810856	0.127449	Q9Y2R4	DDX52_HUMAN	DDX52	Probable ATP-dependent RNA helicase DDX52	Color2 [DarkGray]	1	4		19.0282	17.3917	19.0737	18.3436	18.3072	18.4604
	1.80945	-0.396559	Q9Y2R9	RT07_HUMAN	MRPS7	Small ribosomal subunit protein uS7m	Color2 [DarkGray]	1	4		20.0121	19.9576	20.1855	20.444	20.3295	20.5713
	0.251818	-0.0934277	Q9Y2X3	NOP58_HUMAN	NOP58	Nucleolar protein 58	Color2 [DarkGray]	1	4		19.6887	19.7997	19.8925	19.8327	19.6855	20.143
	0.660119	-0.294919	Q9Y324	FCF1_HUMAN	FCF1	rRNA-processing protein FCF1 homolog	Color2 [DarkGray]	1	4		19.6812	19.2158	19.5334	19.951	19.8874	19.4767
	1.15556	-0.1884	Q9Y383	LC7L2_HUMAN	LUC7L2	Putative RNA-binding protein Luc7-like 2	Color2 [DarkGray]	1	4		22.9276	22.9958	23.1654	23.1913	23.1854	23.2773
	1.14723	-0.276335	Q9Y399	RT02_HUMAN	MRPS2	Small ribosomal subunit protein uS2m	Color2 [DarkGray]	1	4		19.5262	19.4748	19.5588	19.5951	19.8173	19.9765
	0.23091	0.0663484	Q9Y3A2	UTP11_HUMAN	UTP11	Probable U3 small nucleolar RNA-associated protein 11	Color2 [DarkGray]	1	4		20.0151	20.1035	19.8932	20.116	19.793	19.9037
	0.850782	3.10976	Q9Y3B7	RM11_HUMAN	MRPL11	Large ribosomal subunit protein uL11m	Color2 [DarkGray]	1	4		16.1528	18.4724	21.6844	16.7491	15.3266	14.9045
	0.491021	-0.922665	Q9Y3B9	RRP15_HUMAN	RRP15	RRP15-like protein	Color2 [DarkGray]	1	4		20.0213	17.5568	19.8687	19.9761	19.8069	20.4318
	0.247946	-0.0425975	Q9Y3C1	NOP16_HUMAN	NOP16	Nucleolar protein 16	Color2 [DarkGray]	1	4		22.7614	22.7669	22.7768	22.9372	22.7047	22.7911
	0.189934	0.769954	Q9Y3C6	PPIL1_HUMAN	PPIL1	Peptidyl-prolyl cis-trans isomerase-like 1	Color2 [DarkGray]	1	4		14.9144	20.0569	18.6154	16.8674	17.5885	16.8209
	0.250928	-0.334339	Q9Y3E0	GOT1B_HUMAN	GOLT1B	Vesicle transport protein GOT1B	Color2 [DarkGray]	1	4		18.5325	17.5146	18.7924	19.0504	18.8841	17.9079
	0.371383	0.222457	Q9Y3L5	RAP2C_HUMAN	RAP2C	Ras-related protein Rap-2c	Color2 [DarkGray]	1	4		20.0653	20.2446	19.5962	19.6074	20.065	19.5663
	0.668671	1.60672	Q9Y3T9	NOC2L_HUMAN	NOC2L	Nucleolar complex protein 2 homolog	Color2 [DarkGray]	1	4		18.779	18.1233	18.1568	14.6128	17.6969	17.9293
	0.607906	-0.463395	Q9Y3U8	RL36_HUMAN	RPL36	Large ribosomal subunit protein eL36	Color2 [DarkGray]	1	4		29.2895	28.2281	29.1776	29.4756	29.3303	29.2796
	0.518836	-0.190116	Q9Y3Y2;Q9Y3Y2-3;Q9Y3Y2-4	CHTOP_HUMAN	CHTOP	Chromatin target of PRMT1 protein	Color2 [DarkGray]	1	4		17.4401	17.2952	17.7887	17.5734	17.801	17.72
	0.888601	2.06343	Q9Y446;Q9Y446-2	PKP3_HUMAN	PKP3	Plakophilin-3	Color2 [DarkGray]	1	4		19.5353	19.7188	19.531	18.6642	15.3716	18.5591
	1.18102	1.80163	Q9Y4B5	MTCL1_HUMAN	MTCL1	Microtubule cross-linking factor 1	Color2 [DarkGray]	1	4		19.5496	18.4335	19.3864	16.8981	16.5108	18.5556
	0.216094	-0.11338	Q9Y4C8	RBM19_HUMAN	RBM19	Probable RNA-binding protein 19	Color2 [DarkGray]	1	4		19.9376	19.8954	19.9235	19.9842	19.7059	20.4064
	0.149841	0.0525888	Q9Y4F1;Q9Y4F1-2	FARP1_HUMAN	FARP1	FERM, ARHGEF and pleckstrin domain-containing protein 1	Color2 [DarkGray]	1	4		23.5616	23.4042	23.2212	23.3891	23.4639	23.1761
	1.11982	3.69052	Q9Y4P3	TBL2_HUMAN	TBL2	Transducin beta-like protein 2	Color2 [DarkGray]	1	4		19.4533	19.2614	19.2688	14.0985	14.079	18.7344
	1.44008	0.754924	Q9Y5A9	YTHD2_HUMAN	YTHDF2	YTH domain-containing family protein 2	Color2 [DarkGray]	1	4		20.2037	20.9417	20.3122	19.5705	19.8037	19.8187
	1.01279	0.225222	Q9Y5B9	SP16H_HUMAN	SUPT16H	FACT complex subunit SPT16	Color2 [DarkGray]	1	4		25.1531	25.2147	25.1607	24.8763	24.8228	25.1537
	1.17136	0.494502	Q9Y5J1	UTP18_HUMAN	UTP18	U3 small nucleolar RNA-associated protein 18 homolog	Color2 [DarkGray]	1	4		20.8819	21.1058	21.5112	20.6182	20.5789	20.8182
	0.87092	2.47991	Q9Y5M8	SRPRB_HUMAN	SRPRB	Signal recognition particle receptor subunit beta	Color2 [DarkGray]	1	4		16.3443	19.5719	16.8527	13.4165	15.6306	16.2821
	0.48107	-1.94856	Q9Y5S9;Q9Y5S9-2	RBM8A_HUMAN	RBM8A	RNA-binding protein 8A	Color2 [DarkGray]	1	4		14.6127	20.3416	15.6929	18.6596	18.9791	18.8541
	1.49643	-0.471454	Q9Y608-4	LRRF2_HUMAN	LRRFIP2	Isoform of Q9Y608, Isoform 4 of Leucine-rich repeat flightless-interacting protein 2	Color2 [DarkGray]	1	4		21.935	21.7367	21.7446	22.4815	22.3154	22.0339
	0.572398	-0.665476	Q9Y646	CBPQ_HUMAN	CPQ	Carboxypeptidase Q	Color2 [DarkGray]	1	4		19.9814	18.597	20.2648	20.2188	20.2516	20.3692
	1.25316	-0.717307	Q9Y676	RT18B_HUMAN	MRPS18B	Small ribosomal subunit protein mS40	Color2 [DarkGray]	1	4		19.9256	19.8703	20.1388	20.7309	20.2357	21.12
