# Supplementary material for: CUL4A-DDB1-DCAF10 is an N-recognin for N-terminally acetylated Src kinases
Source: Research Square preprint supplement (doi:10.21203/rs.3.rs-6184818/v1), 2025-04-01
Supplement: Supplementary file 5 [file f8d95889c462e9278322e675.xlsx]

## Sheet: acTMEM97_TMEM97
Significant	-LOG(P-value)	Difference	Protein.Group	Protein.Ids	Protein.Names	Genes	First.Protein.Description	acTM_1	acTM_2	acTM_3	TM_1	TM_2	TM_3
+	1.48864	3.28149	Q5QP82	Q5QP82;A0A0A0MQT4;Q5QP82-2	DCA10_HUMAN	DCAF10	DDB1- and CUL4-associated factor 10	18.4277	18.3248	19.5955	13.8008	17.0299	15.6728
+	1.58298	0.274031	A0A024R4E5;C9J5E5;C9JBS3;C9JEJ8;C9JES8;C9JHN6;C9JHS7;C9JHZ8;C9JIZ1;C9JK79;C9JT62;C9JZI8	C9J5E5;C9JZI8;C9JT62;C9JK79;C9JIZ1;C9JHS7;C9JHN6;C9JHZ8;C9JBS3;C9JEJ8;C9JES8;A0A024R4E5	A0A024R4E5_HUMAN;C9J5E5_HUMAN;C9JBS3_HUMAN;C9JEJ8_HUMAN;C9JES8_HUMAN;C9JHN6_HUMAN;C9JHS7_HUMAN;C9JHZ8_HUMAN;C9JIZ1_HUMAN;C9JK79_HUMAN;C9JT62_HUMAN;C9JZI8_HUMAN	HDLBP	Isoform of Q00341, High density lipoprotein binding protein (Vigilin), isoform CRA_a	19.5117	19.4706	19.6509	19.3102	19.1564	19.3445
+	2.15654	1.41683	A0A024RCL3;A0A0G2JJ55;A0A0G2JK11;Q96QC4	Q96QC4;A0A024RCL3;A0A0G2JK11;A0A0G2JJ55	A0A024RCL3_HUMAN;A0A0G2JJ55_HUMAN;A0A0G2JK11_HUMAN;Q96QC4_HUMAN	MICA	Isoform of Q29983, MHC class I polypeptide-related sequence A	22.4303	22.4083	21.5874	20.6976	20.7421	20.7358
+	1.1507	2.52227	A0A0A0MTC1;A0A0A0MTR7	A0A0A0MTC1;A0A0A0MTR7	A0A0A0MTC1_HUMAN;A0A0A0MTR7_HUMAN	RNF213	Isoform of Q63HN8, E3 ubiquitin-protein ligase RNF213	18.0484	18.3534	18.5021	15.2333	14.3458	17.758
+	1.73199	0.714202	A0A0B4J2B4	P62841;K7EJ78;S4R417;A0A0B4J2B4;S4R456;K7ELC2;K7EM56;K7EQJ5	A0A0B4J2B4_HUMAN	RPS15	Isoform of P62841, 40S ribosomal protein S15	19.6058	19.9148	20.1488	19.171	19.0051	19.3506
+	2.95887	1.33481	A0A0C4DG89	A0A0C4DG89	A0A0C4DG89_HUMAN	DDX46	Isoform of Q7L014, RNA helicase	20.6159	20.8688	21.1592	19.5253	19.5183	19.5959
+	2.42898	1.17344	A0A0U1RQK7;A0A8I5KV92	A0A8I5QKZ5;A0A0U1RQK7;A0A8I5KV92	A0A0U1RQK7_HUMAN;A0A8I5KV92_HUMAN	EIF4G3	Isoform of O43432, Eukaryotic translation initiation factor 4 gamma 3	19.163	19.1302	19.3969	18.0849	17.7417	18.3431
+	1.2581	0.718603	A0A1B0GV68	A0A1B0GV68	A0A1B0GV68_HUMAN	FARP1	Isoform of Q9Y4F1, FERM, ARHGEF and pleckstrin domain-containing protein 1	18.9819	19.145	19.1678	18.7828	18.4669	17.8892
+	1.66987	0.856964	A0A2P0CTR9	A0A2P0CTR9	A0A2P0CTR9_HUMAN	C8orf34	Isoform of Q49A92, Uncharacterized protein C8orf34	19.819	19.8397	19.5927	18.6791	19.3329	18.6687
+	1.77395	-0.719235	A0A2R8Y424	A0A2R8Y424	A0A2R8Y424_HUMAN	PRRC2C	Isoform of Q9Y520, Protein PRRC2C (Fragment)	19.4149	19.625	19.8943	20.3355	20.1754	20.581
+	1.78078	1.1482	A0A2R8Y619	A0A2R8Y619	H2BK1_HUMAN	H2BK1	Histone H2B type 2-K1	21.6991	22.0346	21.3918	20.805	20.7588	20.1172
+	1.10665	0.786617	A0A2R8YFE2	A0A2R8YFE2	A0A2R8YFE2_HUMAN	ACTB	Isoform of P60709, Actin, cytoplasmic 1 (Fragment)	18.5562	18.2571	18.9868	17.4688	18.3197	17.6517
+	2.61316	0.89387	A0A494BZV2	H0Y7E2;H0Y2S9;A0A494BZV2	A0A494BZV2_HUMAN	MPRIP	Isoform of Q6WCQ1, Myosin phosphatase Rho-interacting protein	21.0021	20.8829	20.95	20.0703	19.8227	20.2605
+	2.2461	0.810147	A0A494C0R8;I3L2B0	A0A494C0R8;I3L2B0	A0A494C0R8_HUMAN;I3L2B0_HUMAN	CLUH	Isoform of O75153, Clustered mitochondria protein homolog	20.0169	20.0735	19.7833	19.0709	19.3844	18.9879
+	1.89534	1.01215	A0A4W8VX11;A0A5H1ZRS1;E7EV93;E9PGW9	A0A5H1ZRS1;E7EV93;A0A4W8VX11;E9PGW9	A0A4W8VX11_HUMAN;A0A5H1ZRS1_HUMAN;E7EV93_HUMAN;E9PGW9_HUMAN	PCM1	Isoform of Q15154, Pericentriolar material 1 protein	16.8416	16.4432	17.0847	15.4949	15.9633	15.8748
+	3.82196	0.853525	A0A6Q8PFE4;A0A804HKV3	A0A6Q8PFE4;A0A804HKV3	A0A6Q8PFE4_HUMAN;A0A804HKV3_HUMAN	ACTA1;ACTB	Isoform of P60709, Actin, cytoplasmic 1	21.5185	21.6615	21.6041	20.6549	20.8037	20.7648
+	3.53967	0.706463	A0A7I2YQ88	P11940;Q4VXU2;E7ERJ7;E7EQV3;P11940-2;H0YAR2;H0YAP2;A0A6I8PLA1;A0A6I8PS38;A0A6Q8JFT6;Q4VXU2-2;A0A7I2YQ88;A0A7I2YQE4;A0A087WTT1;A0A7I2V4N4	A0A7I2YQ88_HUMAN	PABPC1	Isoform of P11940, Polyadenylate-binding protein	27.2974	27.2499	27.1971	26.4406	26.6132	26.5713
+	1.43648	0.566793	A0A7P0T8N5	Q99996;A0A2R8Y590;Q99996-1;Q99996-3;Q99996-5;Q99996-6;A0A7P0T928;A0A7P0T8N5;A0A7P0T9A9;A0A7P0TAX3;A0A7P0TBH8;A0A7P0TBI4;A0A7P0TAD6;H7BYL6;A0A0A0MRF6;A0A7P0Z4N5;A0A7P0Z4Q5	A0A7P0T8N5_HUMAN	AKAP9	Isoform of Q99996, A-kinase anchor protein 9	18.7697	19.026	18.861	18.1613	18.6534	18.1415
+	2.95491	1.15596	A0A804HKE7;E7EVA0	E7EVA0;B5MEG9;A0A804HKE7	A0A804HKE7_HUMAN;E7EVA0_HUMAN	MAP4	Isoform of P27816, Microtubule-associated protein	20.7379	20.6127	20.6746	19.7781	19.336	19.4433
+	2.64106	1.7042	A0A8C8KGQ8	A0A8C8KGQ8	A0A8C8KGQ8_HUMAN	UBAP2	Isoform of Q5T6F2, Ubiquitin-associated protein 2	18.6891	18.7204	18.4837	16.4584	17.1345	17.1877
+	2.9008	0.762437	A0A8C8NWT4	A1L390;A0A8C8NWT4;A0A0U1RR71;A1L390-3	A0A8C8NWT4_HUMAN	PLEKHG3	Isoform of A1L390, Pleckstrin homology domain-containing family G member 3	21.6283	21.5571	21.462	20.9148	20.6375	20.8078
+	1.6217	2.03381	A0A8I5KRU0	A0A8I5QJQ7;H0Y7B8;A0A8J9BZL8;A0A8I5KRU0;A0A8I5KZ68	A0A8I5KRU0_HUMAN	GOLGA2	Isoform of Q08379, Golgin subfamily A member 2 (Fragment)	17.0685	17.599	17.9712	16.5274	14.9117	15.0982
+	5.62007	1.33264	A0A8V8TMQ1;A0A8V8TNP6	A0A8V8TNP6;A0A8V8TMQ1	A0A8V8TMQ1_HUMAN;A0A8V8TNP6_HUMAN	FXR1	Isoform of P51114, Fragile X mental retardation, autosomal homolog 1, isoform CRA_d	21.5806	21.5993	21.4957	20.2145	20.2164	20.2467
+	3.89819	-0.668374	A0A8V8TR54;H7C0J3	H7C3H7;H7C0J3;A0A8V8TR54	A0A8V8TR54_HUMAN;H7C0J3_HUMAN	CHD3	Isoform of Q12873, Chromodomain-helicase-DNA-binding protein 3	19.5143	19.5697	19.5528	20.2337	20.2758	20.1323
+	4.84601	0.472748	A0FGR8-2	A0FGR8;A0A499FIX8;H7BXI1;A0FGR8-2;A0FGR8-4;A0FGR8-6	ESYT2_HUMAN	ESYT2	Isoform of A0FGR8, Isoform 2 of Extended synaptotagmin-2	21.2516	21.2723	21.2494	20.7508	20.8029	20.8013
+	2.36754	-1.84617	A0FGR8-6	H7BXI1;A0FGR8-6	ESYT2_HUMAN	ESYT2	Isoform of A0FGR8, Isoform 6 of Extended synaptotagmin-2	15.8825	16.1885	15.1291	17.5935	17.6231	17.5221
+	0.844374	2.15288	A0MZ66;A0MZ66-3;A0MZ66-4;A0MZ66-5;A0MZ66-6;A0MZ66-8	A0MZ66;A0MZ66-3;A0MZ66-4;A0MZ66-5;A0MZ66-6;A0MZ66-7;A0MZ66-8	SHOT1_HUMAN	SHTN1	Shootin-1	18.131	18.4083	18.3358	15.8389	14.2601	18.3175
+	2.00016	3.53873	A1X283	A1X283;A0A1B0GUF2;G3V144	SPD2B_HUMAN	SH3PXD2B	SH3 and PX domain-containing protein 2B	18.6815	17.4287	18.6164	14.0294	14.0742	16.0068
+	1.78367	2.99785	A2RU49-2	A2RU49;A2RU49-2;A2RU49-3;A0A0C4DGM4	HYKK_HUMAN	HYKK	Isoform of A2RU49, Isoform 2 of Hydroxylysine kinase	19.7496	19.6221	19.4738	16.7835	17.8249	15.2436
+	1.43428	1.39649	A3KMH1	A3KMH1;A3KMH1-2;A3KMH1-3	VWA8_HUMAN	VWA8	von Willebrand factor A domain-containing protein 8	18.5846	18.4689	19.2005	16.6074	17.5251	17.9321
+	2.91017	0.796356	A3KN83;A3KN83-2	A3KN83;A3KN83-2;A3KN83-3	SBNO1_HUMAN	SBNO1	Protein strawberry notch homolog 1	20.475	20.4726	20.1903	19.5995	19.6146	19.5348
+	1.78668	-1.07268	A4FU49;A4FU49-3;A4FU49-6	A4FU49;A4FU49-3;A4FU49-6	SH321_HUMAN	SH3D21	SH3 domain-containing protein 21	15.6132	15.7346	14.9652	16.5109	16.2948	16.7253
+	4.93136	0.963032	A5YKK6	A5YKK6;H3BR89;A5YKK6-4;A5YKK6-2;A5YKK6-3	CNOT1_HUMAN	CNOT1	CCR4-NOT transcription complex subunit 1	21.4812	21.5336	21.5461	20.5263	20.5281	20.6175
+	4.32122	1.08985	A6ND36	A6ND36	FA83G_HUMAN	FAM83G	Protein FAM83G	18.5827	18.6724	18.7736	17.587	17.6182	17.554
+	2.77875	1.02299	A6NHR9	A6NHR9;J3KTL8;A0A8I5KRS9;A6NHR9-2	SMHD1_HUMAN	SMCHD1	Structural maintenance of chromosomes flexible hinge domain-containing protein 1	18.9488	18.9912	18.8582	18.1694	17.7669	17.7929
+	2.0617	0.516848	A6NNL0;B1AL46;Q5VT03;Q8IVF1	Q8IVF1;A6NNL0;Q5VT03;B1AL46	NTM2A_HUMAN;NTM2B_HUMAN;NTM2D_HUMAN;NTM2E_HUMAN	NUTM2A;NUTM2B;NUTM2D;NUTM2E	NUT family member 2B	24.2223	23.917	24.249	23.6341	23.6238	23.5799
+	2.4947	0.970187	A6ZKI3	Q9BWD3;Q17RB0;A6ZKI3	RTL8C_HUMAN	RTL8C	Isoform of O15255, Retrotransposon Gag-like protein 8C	19.8132	19.7699	20.0463	18.8371	19.1529	18.7289
+	0.808212	1.48081	A7E2V4;A7E2V4-2;A7E2V4-3;A7E2V4-4;A7E2V4-5	A7E2V4;H7C453;S4R3H3;S4R3S6;S4R410;S4R3U7;S4R393;S4R3B3;A7E2V4-2;A7E2V4-3;A7E2V4-4;A7E2V4-5	ZSWM8_HUMAN	ZSWIM8	Zinc finger SWIM domain-containing protein 8	18.2773	18.4441	18.5456	17.8434	15.2551	17.7261
+	1.21626	-1.85407	A8K855	A8K855;A8K855-2	EFCB7_HUMAN	EFCAB7	EF-hand calcium-binding domain-containing protein 7	18.1041	16.584	18.5688	19.7491	20.2029	18.8671
+	2.74144	2.80602	A8MQ03	A8MQ03;B8A4K4	CRTP1_HUMAN	CYSRT1	Cysteine-rich tail protein 1	18.798	18.8808	18.8355	16.2331	16.567	15.2961
+	0.912635	0.668701	A8MV65;A8MV65-2	A8MV65;H7C571;A8MV65-2	VGLL3_HUMAN	VGLL3	Transcription cofactor vestigial-like protein 3	16.6789	16.3338	16.9785	16.4597	16.0543	15.4712
+	0.966683	0.58393	A8MWD9;P62308	A8MWD9;P62308;C9JVQ0;Q49AN9;F5H013	RUXGL_HUMAN;RUXG_HUMAN	SNRPG;SNRPGP15	Putative small nuclear ribonucleoprotein G-like protein 15	22.8478	23.0966	22.2934	22.3369	21.8552	22.294
+	5.01001	7.31067	B1ANS9;B1ANS9-2	B1ANS9;H0Y6L4;A0A0C4DG52;B1ANS9-2	WDR64_HUMAN	WDR64	WD repeat-containing protein 64	22.2304	22.0289	22.3745	14.4912	15.3281	14.8825
+	2.47214	1.54368	C4AMC7;Q6VEQ5	C4AMC7;A8K0Z3;Q6VEQ5;Q9NQA3;A8MWX3;A0A7I2YQU6	WASH2_HUMAN;WASH3_HUMAN	WASH2P;WASH3P	Putative WAS protein family homolog 3	19.2959	19.3634	19.3315	17.2986	17.966	18.0951
+	2.49506	0.758037	C9K0I9	C9K0I9	C9K0I9_HUMAN	MYO1B	Isoform of O43795, Unconventional myosin-Ib (Fragment)	18.5353	18.7643	18.8683	17.9011	18.1014	17.8912
+	3.36095	3.4661	D6RHC4	D6RHC4	D6RHC4_HUMAN	ANKHD1	Isoform of Q8IWZ3, Ankyrin repeat and KH domain-containing protein 1 (Fragment)	18.2451	18.5308	18.672	15.6015	14.6142	14.8338
+	1.61651	0.274722	E7ERS3	Q86VM9;E7ERS3	E7ERS3_HUMAN	ZC3H18	Isoform of Q86VM9, Zinc finger CCCH domain-containing protein 18	20.9902	21.0062	20.8512	20.6981	20.7649	20.5604
+	3.31344	1.3342	E9PMS6;H0YDG6	H0YDG6;E9PMS6	E9PMS6_HUMAN;H0YDG6_HUMAN	LMO7	Isoform of Q8WWI1, LIM domain only protein 7	20.0519	20.1612	20.4656	18.9555	18.8844	18.8362
+	3.00661	5.91104	E9PQ56	E9PQ56	E9PQ56_HUMAN	PUF60	Isoform of Q9UHX1, Poly(U)-binding-splicing factor PUF60 (Fragment)	19.301	19.6719	20.9723	14.0853	14.8585	13.2683
+	2.44713	1.87509	E9PQE1	E9PQE1	E9PQE1_HUMAN	MS4A8	Isoform of Q9BY19, Membrane-spanning 4-domains subfamily A member 8 (Fragment)	17.8833	17.8725	17.3743	16.3296	15.697	15.4784
+	1.25253	0.702564	F5GXR3	P20962;F5GXR3	F5GXR3_HUMAN	PTMS	Isoform of P20962, Parathymosin	20.1091	20.8692	20.4233	19.9377	19.8772	19.479
+	3.32849	0.721015	F6RGN5	Q9UBX3;F6RGN5;Q9UBX3-2;I3L1E8;B4DLN1	F6RGN5_HUMAN	SLC25A10	Isoform of Q9UBX3, Mitochondrial dicarboxylate carrier	23.0485	23.029	22.8834	22.1805	22.3331	22.2842
+	1.23746	-1.95454	F8VVB5	F8VVB5	F8VVB5_HUMAN	NAP1L1	Isoform of P55209, Nucleosome assembly protein 1-like 1 (Fragment)	15.8881	14.9103	17.4554	17.9924	18.0879	18.037
+	1.13237	2.54639	F8VWZ5	F8VWZ5	F8VWZ5_HUMAN	HLX	Isoform of Q14774, H2.0-like homeobox protein (Fragment)	20.5583	20.6978	20.4239	18.9966	19.1382	15.906
+	1.79593	0.795681	F8WB05	A0A2R8Y7E6;F8WB05;A0A5F9ZI57;A0A5F9ZHX3	F8WB05_HUMAN	ATXN2	Isoform of Q99700, Ataxin-2 (Fragment)	21.3244	21.1568	21.4415	20.1552	20.7373	20.6432
+	2.99045	-1.53134	G5EA36;I3L328	G5EA36;I3L328	G5EA36_HUMAN;I3L328_HUMAN	CDC27	Isoform of P30260, Cell division cycle 27, isoform CRA_c	17.003	17.0383	16.543	18.552	18.2887	18.3376
+	1.4086	2.66824	H0Y8U0	H0Y8U0	H0Y8U0_HUMAN	STOX2	Isoform of Q9P2F5, Storkhead-box protein 2	17.7628	18.1883	18.0785	14.0195	15.0144	16.9909
+	1.15234	-0.648355	H0YAN4	H0YAN4	H0YAN4_HUMAN	LARP1	Isoform of Q6PKG0, La-related protein 1 (Fragment)	17.9598	17.7802	17.1138	18.3253	18.3303	18.1433
+	1.15631	1.34034	H0YBJ8	H0YBJ8	H0YBJ8_HUMAN	MTDH	Isoform of Q86UE4, Protein LYRIC (Fragment)	16.0077	15.8125	16.8589	14.8965	14.1181	15.6435
+	1.33867	0.418129	H0YBM7	H0YBM7	H0YBM7_HUMAN	LARP1	Isoform of Q6PKG0, La-related protein 1 (Fragment)	21.4916	21.3997	21.8527	21.2241	21.1953	21.0702
+	0.85989	-0.852861	H3BNG3	H3BNG3	H3BNG3_HUMAN	RPS2	Isoform of P15880, 40S ribosomal protein S2 (Fragment)	16.405	16.7283	15.342	16.7827	17.3952	16.8561
+	1.86529	0.782594	H3BUF6	H3BUF6	H3BUF6_HUMAN	ATXN2L	Isoform of Q8WWM7, Ataxin-2-like protein	21.2221	21.512	21.7999	20.6883	20.8876	20.6103
+	1.83831	0.370663	H7BY16	P19338;C9JLB1;H7BY16;A0A7I2V2S8;A0A7I2V2U7;A0A7I2V349;A0A7I2V3F3;A0A7I2V428;A0A7I2V506;A0A7I2V5M5;A0A7I2V699	H7BY16_HUMAN	NCL	Isoform of P19338, Nucleolin	29.1742	29.0622	29.1312	28.8235	28.847	28.5851
+	1.29788	4.12857	H7BY36	H7BY36	H7BY36_HUMAN	EWSR1	Isoform of Q01844, RNA-binding protein EWS (Fragment)	20.8198	20.6845	20.9095	14.8622	15.5367	19.6292
+	1.35221	0.352443	J3QQY7	J3KTM5;A0A8I5KXR5;J3QQY7	J3QQY7_HUMAN	TANC2	Isoform of Q9HCD6, Protein TANC2 (Fragment)	21.2234	21.4478	21.5537	21.0697	20.9227	21.1752
+	2.0635	-1.50893	K7EJN4	K7EK65;K7EJN4	K7EJN4_HUMAN	TCF3	Isoform of P15923, Transcription factor E2-alpha (Fragment)	16.8822	17.3747	17.9406	18.8772	18.8006	19.0465
+	0.999194	2.35379	L0R8F8	L0R8F8	MIDUO_HUMAN	MIEF1	Isoform of Q9NQG6, MIEF1 upstream open reading frame protein	18.0182	17.1055	18.2813	17.539	14.3531	14.4515
+	4.34156	0.406507	M0QZM1	P52272;P52272-2;M0QZM1;A0A087X0X3	M0QZM1_HUMAN	HNRNPM	Isoform of P52272, Heterogeneous nuclear ribonucleoprotein M (Fragment)	26.4009	26.4141	26.4594	26.0154	25.999	26.0405
+	0.902583	1.2273	O00116	O00116;A0A2R8YEL0;A0A7P0T9C9;A0A7P0T984;A0A1B0GWA2;B7Z3Q4;A0A7P0TAU9;A0A7P0TAL3	ADAS_HUMAN	AGPS	Alkyldihydroxyacetonephosphate synthase, peroxisomal	17.9055	18.3467	18.1557	17.4543	15.6689	17.6028
+	1.84404	0.918732	O00139-2	A0A6Q8PFA6;A0A6Q8PH57;O00139-2	KIF2A_HUMAN	KIF2A	Isoform of O00139, Isoform 2 of Kinesin-like protein KIF2A	18.1761	18.4754	17.8436	17.3229	17.4156	17.0005
+	2.59578	0.846029	O00139;O00139-4	O00139;A0A6Q8PFA6;A0A6Q8PG37;A0A6Q8PGH7;A0A6Q8PGG1;A0A6Q8PH57;D6R9M0;O00139-1;O00139-2;O00139-4;O00139-5	KIF2A_HUMAN	KIF2A	Kinesin-like protein KIF2A	21.0567	20.8536	20.6633	19.9044	20.069	20.0621
+	1.51017	3.14066	O00151	O00151	PDLI1_HUMAN	PDLIM1	PDZ and LIM domain protein 1	19.0576	19.4674	19.262	15.6294	17.9646	14.7711
+	2.16007	0.909121	O00154;O00154-4;O00154-5;O00154-6;O00154-7	O00154;K7EKP8;O00154-2;O00154-3;O00154-4;O00154-5;O00154-6;O00154-7	BACH_HUMAN	ACOT7	Cytosolic acyl coenzyme A thioester hydrolase	19.5015	19.3497	19.5251	18.7386	18.6981	18.2123
+	1.04198	1.6689	O00159	O00159	MYO1C_HUMAN	MYO1C	Unconventional myosin-Ic	18.8118	18.688	18.8495	18.0596	17.6518	15.6313
+	3.0673	1.51337	O00159-2	O00159-2;I3L3Y6;I3L3F5	MYO1C_HUMAN	MYO1C	Isoform of O00159, Isoform 2 of Unconventional myosin-Ic	24.6655	24.5778	24.7094	22.8588	23.4276	23.1262
+	4.09229	1.13659	O00159-3	O00159;O00159-2;O00159-3;I3L501;I3L3Y6;I3L3F5;F5H6E2	MYO1C_HUMAN	MYO1C	Isoform of O00159, Isoform 3 of Unconventional myosin-Ic	27.0093	26.9613	26.8594	25.7862	25.7263	25.9077
+	3.72672	1.27985	O00161	O00161;H3BV99;H3BQY9;H3BP15;H3BM38	SNP23_HUMAN	SNAP23	Synaptosomal-associated protein 23	21.9881	22.1308	22.0842	20.6138	20.8762	20.8734
+	2.9251	0.659882	O00178	O00178;B0QY59	GTPB1_HUMAN	GTPBP1	GTP-binding protein 1	20.7603	20.7319	20.581	19.9163	20.0788	20.0985
+	1.21347	-0.375229	O00192;O00192-2	O00192;C9JJX6;E9PDC3;O00192-2	ARVC_HUMAN	ARVCF	Splicing regulator ARVCF	19.4628	19.7454	19.8536	19.9728	19.9785	20.2361
+	2.94668	0.590986	O00203	Q13367;O00203;A0A0S2Z4Z4;A0A2R8Y2A8;A0A590UKC4;A0A590UJU0;A0A590UJU7;A0A590UK04;A0A590UJE5;A0A590UJ60;O00203-3;A0A8Q3WKF8;A0A8Q3WKJ9;Q13367-3;Q13367-4;A0A8Q3WKI5;A0A8Q3WKK0;A0A8Q3WKN2;A0A8Q3SIM7;A0A8Q3WL34;A0A8Q3SIS1;A0A8Q3SHR2;A0A8Q3SHS3;A0A8Q3SHU2;A0A8Q3SHW6;A0A8Q3SHP3;A0A8Q3SI03;A0A5F9UJV3	AP3B1_HUMAN	AP3B1	AP-3 complex subunit beta-1	22.8052	22.8014	22.6393	22.2147	22.0686	22.1896
+	3.48662	1.09837	O00231	O00231;O00231-2;J3QRY4	PSD11_HUMAN	PSMD11	26S proteasome non-ATPase regulatory subunit 11	20.6689	20.7212	20.794	19.4897	19.6063	19.793
+	3.3559	1.07861	O00232	O00232;O00232-2	PSD12_HUMAN	PSMD12	26S proteasome non-ATPase regulatory subunit 12	20.4658	20.3945	20.6677	19.4282	19.5354	19.3286
+	4.26424	0.640988	O00257	O00257;O00257-3;F8WCW6	CBX4_HUMAN	CBX4	E3 SUMO-protein ligase CBX4	20.8928	20.9231	20.8391	20.1952	20.256	20.2809
+	1.70041	0.510918	O00264	O00264	PGRC1_HUMAN	PGRMC1	Membrane-associated progesterone receptor component 1	17.8278	17.5897	17.6504	17.2542	17.3303	16.9506
+	1.86789	-0.405968	O00267;O00267-2	O00267;O00267-2	SPT5H_HUMAN	SUPT5H	Transcription elongation factor SPT5	20.9117	21.136	20.942	21.4195	21.5074	21.2808
+	1.37935	0.379831	O00268	O00268;A0A8I5KW49	TAF4_HUMAN	TAF4	Transcription initiation factor TFIID subunit 4	17.7948	17.6222	17.9204	17.3541	17.2619	17.5819
+	4.55654	1.46349	O00299	O00299	CLIC1_HUMAN	CLIC1	Chloride intracellular channel protein 1	20.7739	20.6296	20.8431	19.2412	19.3318	19.2831
+	1.52903	-0.292614	O00303	O00303;H0YDT6	EIF3F_HUMAN	EIF3F	Eukaryotic translation initiation factor 3 subunit F	25.8445	25.8397	26.0681	26.1433	26.1883	26.2985
+	1.1694	1.57805	O00327;O00327-1;O00327-7;O00327-8;O00327-9	O00327;O00327-4;O00327-7;O00327-8;O00327-9;O00327-1;A0A669KBF4	BMAL1_HUMAN	BMAL1	Basic helix-loop-helix ARNT-like protein 1	19.611	17.6953	19.5629	17.4361	17.2398	17.4592
+	1.6024	2.56374	O00401	O00401	WASL_HUMAN	WASL	Actin nucleation-promoting factor WASL	19.1818	19.1184	18.5452	15.0599	17.4639	16.6303
+	1.98421	0.230304	O00410	O00410;O00410-2;O00410-3;H0Y8C6	IPO5_HUMAN	IPO5	Importin-5	21.3296	21.3722	21.4827	21.1361	21.1502	21.2074
+	2.82881	0.282094	O00422-2	O00422;O00422-2;U3KQ12	SAP18_HUMAN	SAP18	Isoform of O00422, Isoform 2 of Histone deacetylase complex subunit SAP18	21.9818	22.0112	22.0211	21.6966	21.6804	21.7907
+	2.19324	1.01227	O00429;O00429-2;O00429-3;O00429-4;O00429-5;O00429-6;O00429-8;O00429-9	O00429;O00429-2;O00429-3;O00429-4;O00429-5;O00429-6;O00429-8;O00429-9;F8VZ52;F8VUJ9;F8W1W3;B4DDQ3;A0A8V8TQT5	DNM1L_HUMAN	DNM1L	Dynamin-1-like protein	19.2428	19.3142	19.4643	18.066	18.679	18.2395
+	1.28161	-0.512175	O00442	O00442;A6NIC1;O00442-2	RTCA_HUMAN	RTCA	RNA 3'-terminal phosphate cyclase	19.0799	18.7525	18.9496	19.227	19.3353	19.7563
+	4.62079	0.981403	O00443	O00443	P3C2A_HUMAN	PIK3C2A	Phosphatidylinositol 4-phosphate 3-kinase C2 domain-containing subunit alpha	20.1287	20.1096	20.1988	19.0983	19.179	19.2156
+	2.39681	0.914867	O00469;O00469-2	O00469;E7ETU9;O00469-2;C9JXZ0	PLOD2_HUMAN	PLOD2	Procollagen-lysine,2-oxoglutarate 5-dioxygenase 2	18.7149	18.3629	18.41	17.6278	17.7389	17.3765
+	2.72913	0.42922	O00483	O00483	NDUA4_HUMAN	NDUFA4	Cytochrome c oxidase subunit NDUFA4	20.6218	20.5554	20.6572	20.1912	20.0905	20.2651
+	2.9545	1.1911	O00487	O00487	PSDE_HUMAN	PSMD14	26S proteasome non-ATPase regulatory subunit 14	20.776	20.9231	21.0745	19.698	19.9446	19.5577
+	2.23781	-0.388347	O00488	O00488;A9J4F5	ZN593_HUMAN	ZNF593	Zinc finger protein 593	21.968	21.7329	21.838	22.1874	22.2475	22.2689
+	1.651	0.962212	O00499-2;O00499-6	O00499;O00499-2;O00499-3;O00499-4;O00499-5;O00499-6;O00499-7;O00499-8;O00499-9;O00499-10;O00499-11	BIN1_HUMAN	BIN1	Isoform of O00499, Isoform IIB of Myc box-dependent-interacting protein 1	18.5127	18.5746	19.192	17.9958	17.4952	17.9016
+	1.34428	-0.350671	O00505	O00629;O00505;H7C4F6;A0A7I2V340	IMA4_HUMAN	KPNA3	Importin subunit alpha-4	19.5014	19.3249	19.6942	19.743	19.8885	19.941
+	2.13284	0.351164	O00560-2	O00560;E9PBU7;B4DHN5;O00560-2;G5EA09	SDCB1_HUMAN	SDCBP	Isoform of O00560, Isoform 2 of Syntenin-1	22.5223	22.4892	22.6002	22.2496	22.2458	22.0627
+	2.04218	-0.559318	O00566	O00566;A0A8Q3WK70	MPP10_HUMAN	MPHOSPH10	U3 small nucleolar ribonucleoprotein protein MPP10	20.7366	20.6479	20.3492	21.1073	21.15	21.1544
+	5.16129	0.608036	O00567	O00567;H0YDU4;H0Y653;A0A494C128	NOP56_HUMAN	NOP56	Nucleolar protein 56	23.0334	23.0015	23.0415	22.4487	22.4056	22.3981
+	4.8802	0.446224	O00571	O15523;O00571;C9J8G5;C9J081;A0A2R8Y7T2;A0A2R8Y4A4;A0A2R8Y645;A0A2R8Y5G6;A0A2R8Y4D2;A0A2R8YDT5;A0A2R8YDH3;A0A2R8YCW1;A0A2R8YFS5;A0A2R8YFR4;A0A2R8YF78;A0A2U3TZJ9;F6S8Q4;A0A0D9SG12;A0A0D9SF53;A0A0D9SFB3;O00571-2;O15523-2;O15523-3	DDX3X_HUMAN	DDX3X	ATP-dependent RNA helicase DDX3X	24.3789	24.3965	24.4299	23.9649	23.9386	23.9632
+	2.30824	2.34937	O00592;O00592-2	O00592;O00592-2	PODXL_HUMAN	PODXL	Podocalyxin	18.2872	18.5699	18.6627	16.058	15.5155	16.8983
+	1.87607	0.601662	O00743	O00743;O00743-2	PPP6_HUMAN	PPP6C	Serine/threonine-protein phosphatase 6 catalytic subunit	19.4467	19.171	19.2144	18.5079	18.8916	18.6275
+	4.55139	2.59917	O00763-3	O00763;H0YGH5;F8W8T8;O00763-2;O00763-3	ACACB_HUMAN	ACACB	Isoform of O00763, Isoform 3 of Acetyl-CoA carboxylase 2	21.4183	21.4375	21.4032	18.8542	18.5962	19.0111
+	2.68491	0.774495	O00767	O00767	SCD_HUMAN	SCD	Stearoyl-CoA desaturase	19.813	20.0117	20.0484	19.0523	19.1669	19.3304
+	1.141	0.502757	O14497	O14497;A0A1B0GTU5;H0Y488;O14497-2;O14497-3	ARI1A_HUMAN	ARID1A	AT-rich interactive domain-containing protein 1A	18.2564	18.5774	18.2676	17.5758	17.8266	18.1908
+	2.32061	1.85884	O14530;O14530-2	O14530;O14530-2	TXND9_HUMAN	TXNDC9	Thioredoxin domain-containing protein 9	17.5159	17.3929	17.645	16.0662	15.8828	15.0283
+	1.65549	0.509233	O14545	O14545	TRAD1_HUMAN	TRAFD1	TRAF-type zinc finger domain-containing protein 1	18.7601	18.7617	19.0449	18.1509	18.5024	18.3857
+	4.1752	1.02473	O14578-4	O14578;O14578-3;O14578-4;H7BYJ3;A0A7I2V365;A0A7I2V4A6;A0A7I2V4H7;A0A7I2V4I0;A0A7I2V692	CTRO_HUMAN	CIT	Isoform of O14578, Isoform 4 of Citron Rho-interacting kinase	20.4343	20.383	20.3743	19.4551	19.2644	19.3979
+	3.48279	0.589613	O14617-5	O14617;O14617-2;O14617-3;O14617-4;O14617-5;A0A8V8TQW4	AP3D1_HUMAN	AP3D1	Isoform of O14617, Isoform 5 of AP-3 complex subunit delta-1	22.499	22.5771	22.4577	21.9946	21.8694	21.9009
+	2.15902	0.313616	O14646;O14646-2	O14646;O14646-2	CHD1_HUMAN	CHD1	Chromodomain-helicase-DNA-binding protein 1	22.9976	23.0193	22.8297	22.6436	22.653	22.6092
+	2.79013	0.394484	O14647	O14647;A0A1B0GTU9;A0A0D9SEP7;A0A0D9SEU0;O14647-2;A0A8V8TRB2	CHD2_HUMAN	CHD2	Chromodomain-helicase-DNA-binding protein 2	20.5037	20.3832	20.3776	20.0234	19.9737	20.0838
+	1.4099	3.27714	O14686;O14686-3	O14686;A0A8I5QJD3;A0A804HHR9;A0A8I5KSG1;O14686-3	KMT2D_HUMAN	KMT2D	Histone-lysine N-methyltransferase 2D	19.6156	20.4473	19.327	15.8828	18.5334	15.1422
+	1.65416	-0.457179	O14730	O14730;B4E1Q4;O14730-2	RIOK3_HUMAN	RIOK3	Serine/threonine-protein kinase RIO3	20.0427	19.66	19.9694	20.3103	20.2939	20.4395
+	1.22061	4.27602	O14732;O14732-2	O14732;O14732-2	IMPA2_HUMAN	IMPA2	Inositol monophosphatase 2	20.5719	21.351	20.666	19.6259	16.0772	14.0579
+	0.937964	2.99936	O14733;O14733-3	O14733;O14733-2;O14733-3;O14733-4	MP2K7_HUMAN	MAP2K7	Dual specificity mitogen-activated protein kinase kinase 7	17.9319	17.7383	20.8388	13.9654	17.8045	15.7411
+	1.53301	1.9171	O14734	O14734;F6VBM3;E9PRD4;E9PIS4;E9PJN0;Q9BR14	ACOT8_HUMAN	ACOT8	Acyl-coenzyme A thioesterase 8	18.4416	18.134	18.4988	16.4792	17.4013	15.4426
+	1.17004	1.56553	O14737	O14737;K7EQA1	PDCD5_HUMAN	PDCD5	Programmed cell death protein 5	18.5451	18.4197	18.9786	16.006	18.1028	17.1381
+	2.79611	-0.559291	O14744	O14744;H0YJX6;H0YJ77;G3V5T6;O14744-2;O14744-3;O14744-5;O14744-4	ANM5_HUMAN	PRMT5	Protein arginine N-methyltransferase 5	23.5679	23.6521	23.7834	24.1894	24.3038	24.1881
+	1.6216	0.536764	O14745	O14745;O14745-2	NHRF1_HUMAN	SLC9A3R1	Na(+)/H(+) exchange regulatory cofactor NHE-RF1	19.4375	19.0977	19.3081	18.9355	18.7581	18.5394
+	2.97112	1.33452	O14776;O14776-2	O14776;A0A7P0T8N8;O14776-2	TCRG1_HUMAN	TCERG1	Transcription elongation regulator 1	21.4913	21.36	20.9862	19.9515	20.018	19.8643
+	1.62025	2.87201	O14802	O14802;A0A8V8TNX3;A0A8V8TNL6;A0A8V8TM36;A0A8V8TM70	RPC1_HUMAN	POLR3A	DNA-directed RNA polymerase III subunit RPC1	19.8821	19.666	20.1888	18.6147	16.0419	16.4643
+	3.16196	1.42074	O14818	O14818;H0Y586;O14818-2	PSA7_HUMAN	PSMA7	Proteasome subunit alpha type-7	20.4105	20.6044	20.7563	19.3922	19.0491	19.0676
+	2.04805	0.658806	O14828	O14828;O14828-2	SCAM3_HUMAN	SCAMP3	Secretory carrier-associated membrane protein 3	19.8466	20.0236	19.9954	19.107	19.2438	19.5383
+	1.98856	0.339753	O14893-5	O14893;O14893-5;O14893-2;O14893-3;H0YEL0;A0A8J9FJK1;A0A8J9FN78;G5EA29;A0A3B3IU42	GEMI2_HUMAN	GEMIN2	Isoform of O14893, Isoform 5 of Gem-associated protein 2	20.8048	20.7179	20.7671	20.3866	20.5589	20.3251
+	1.43976	0.613352	O14929	O14929;O14929-2	HAT1_HUMAN	HAT1	Histone acetyltransferase type B catalytic subunit	19.4765	19.5787	20.0512	19.195	19.1591	18.9122
+	2.62595	0.780643	O14939;O14939-4	O14939;I3L1F3;O14939-3;O14939-4	PLD2_HUMAN	PLD2	Phospholipase D2	19.9622	19.8464	19.7352	19.1486	18.8816	19.1716
+	2.24146	1.13733	O14950	O14950	ML12B_HUMAN	MYL12B	Myosin regulatory light chain 12B	26.2421	26.2182	25.5993	24.9099	24.8848	24.8529
+	0.815697	1.16993	O14965	O14965;A3KFJ0;A3KFJ1;A3KFJ2;Q5QPD1;Q5QPD2;Q5QPD4	AURKA_HUMAN	AURKA	Aurora kinase A	17.9941	18.0417	18.2592	17.5519	17.6223	15.6112
+	4.48542	1.33241	O14974	O14974;H0YIM2;H0YIS3;O14974-2;O14974-3;O14974-4;O14974-5	MYPT1_HUMAN	PPP1R12A	Protein phosphatase 1 regulatory subunit 12A	23.9665	23.9199	23.9588	22.4967	22.7109	22.6402
+	3.30133	0.848775	O14975	O14975;G3V1R7;O14975-2	S27A2_HUMAN	SLC27A2	Long-chain fatty acid transport protein 2	20.0524	20.1926	20.2998	19.4098	19.3171	19.2716
+	3.92629	0.735266	O14980	O14980;C9J673;C9JKM9;A0A7I2YQP1;A0A7I2YQV4;A0A7I2YQX3;A0A7I2V2C5;A0A7I2V2H0;A0A7I2V2Y6;A0A7I2V2S3;A0A7I2V3J1;A0A7I2V3N0;A0A7I2V3P3;A0A7I2V461;A0A7I2V3W6;A0A7I2V4A3	XPO1_HUMAN	XPO1	Exportin-1	21.0841	21.2431	21.1178	20.4203	20.4254	20.3935
+	2.3706	0.784965	O14981	O14981;O14981-2	BTAF1_HUMAN	BTAF1	TATA-binding protein-associated factor 172	18.782	18.9704	18.9824	18.3446	18.0934	17.9419
+	2.90671	1.03672	O15013;O15013-4;O15013-5;O15013-6;O15013-7	O15013;E9PB39;H0YAN8;O15013-4;O15013-5;O15013-6;O15013-7	ARHGA_HUMAN	ARHGEF10	Rho guanine nucleotide exchange factor 10	19.1588	19.3156	19.3143	18.3385	18.3463	17.9937
+	0.984387	1.82556	O15014	O15014	ZN609_HUMAN	ZNF609	Zinc finger protein 609	17.5204	17.0609	17.7421	13.986	16.0368	16.8239
+	1.14085	2.2377	O15020;O15020-2	O15020;O15020-2;A4QPE4;A0A087WYQ1	SPTN2_HUMAN	SPTBN2	Spectrin beta chain, non-erythrocytic 2	18.2467	18.586	18.369	15.7284	17.9233	14.8369
+	4.55531	1.06876	O15027-5	O15027;A0A3F2YNX0;A0A3F2YNZ0;F1T0I1;X6RGP5;O15027-3;O15027-4;O15027-5;O15027-2;A0A8I5KPG1	SC16A_HUMAN	SEC16A	Isoform of O15027, Isoform 5 of Protein transport protein Sec16A	24.1094	24.1348	24.0754	22.9672	23.1261	23.02
+	3.807	1.15132	O15031	O15031	PLXB2_HUMAN	PLXNB2	Plexin-B2	20.3857	20.5397	20.5543	19.216	19.4034	19.4065
+	1.85418	0.338576	O15042;O15042-2	O15042;E7ET15;H7C4V2;O15042-2;O15042-3	SR140_HUMAN	U2SURP	U2 snRNP-associated SURP motif-containing protein	24.4246	24.4855	24.2433	24.117	24.0022	24.0184
+	2.00945	0.839493	O15067	O15067;H0YGH1	PUR4_HUMAN	PFAS	Phosphoribosylformylglycinamidine synthase	19.5224	19.4282	19.5779	18.3194	18.8218	18.8689
+	1.13987	-0.847099	O15078	O15078;J3KNF5;A0A6Q8PGB1;A0A6Q8PGP6;A0A6Q8PH24;A0A6Q8PH78;A0A5F9ZHU6	CE290_HUMAN	CEP290	Centrosomal protein of 290 kDa	18.9676	19.1551	18.6281	20.0769	20.0785	19.1368
+	2.84742	0.974684	O15084	O15084;B4DIW9;O15084-1;O15084-2;O15084-4	ANR28_HUMAN	ANKRD28	Serine/threonine-protein phosphatase 6 regulatory ankyrin repeat subunit A	18.5182	18.8068	18.7704	17.8303	17.7846	17.5564
+	3.86694	1.23111	O15143	O15143;F8VXW2;C9K057;C9JEY1;A0A1W2PNV4	ARC1B_HUMAN	ARPC1B	Actin-related protein 2/3 complex subunit 1B	22.4193	22.3217	22.512	21.1373	21.3166	21.1058
+	3.74096	0.689732	O15144	O15144	ARPC2_HUMAN	ARPC2	Actin-related protein 2/3 complex subunit 2	21.8339	21.7137	21.7239	20.9988	21.0971	21.1064
+	3.34236	0.897935	O15145	O15145	ARPC3_HUMAN	ARPC3	Actin-related protein 2/3 complex subunit 3	22.458	22.2575	22.1951	21.3448	21.4419	21.4301
+	1.88898	-0.351959	O15156;O15156-2	O15156;O15156-2	ZBT7B_HUMAN	ZBTB7B	Zinc finger and BTB domain-containing protein 7B	18.3089	18.5517	18.4273	18.7183	18.864	18.7614
+	1.62837	-0.366496	O15160;O15160-2	O15160;A0A2R8Y8D6;O15160-2;A0A2R8Y5D3;E7EQB9;A0A2R8YEZ4;H0Y723	RPAC1_HUMAN	POLR1C	DNA-directed RNA polymerases I and III subunit RPAC1	20.0833	19.8608	19.8	20.1746	20.3657	20.3033
+	2.85475	-0.97333	O15197;O15197-2	O15197;J3KQU5;F8WCM8;O15197-2;O15197-3;A0A0G2JNH7;A0A0G2JNC5	EPHB6_HUMAN	EPHB6	Ephrin type-B receptor 6	21.2187	21.4609	21.5132	22.3311	22.2501	22.5315
+	3.49697	1.15743	O15212	O15212	PFD6_HUMAN	PFDN6	Prefoldin subunit 6	20.9188	20.7358	20.823	19.6052	19.5635	19.8365
+	2.53285	0.19864	O15226;O15226-2	O15226;O15226-2;A0A8I5KX72	NKRF_HUMAN	NKRF	NF-kappa-B-repressing factor	21.65	21.7172	21.7112	21.5295	21.4989	21.4541
+	5.46447	0.274387	O15234	O15234	CASC3_HUMAN	CASC3	Protein CASC3	22.0769	22.0663	22.0654	21.8018	21.8018	21.782
+	2.08552	-2.00278	O15235	O15235	RT12_HUMAN	MRPS12	28S ribosomal protein S12, mitochondrial	15.6593	16.7028	16.8324	18.7303	18.1263	18.3462
+	2.5227	0.740157	O15258	O15258	RER1_HUMAN	RER1	Protein RER1	19.8655	20.1377	20.0424	19.3377	19.3767	19.1108
+	1.31307	0.515363	O15260	O15260;O15260-2;B7Z1G8;Q5T8U5	SURF4_HUMAN	SURF4	Surfeit locus protein 4	19.4452	19.2603	19.3966	18.6957	19.2019	18.6584
+	2.16383	0.387951	O15269	O15269;A0A8I5QKQ8;A0A2R8Y763;A0A2R8Y6A2;A0A2R8Y4S0;O15269-2;A0A8I5KUM4	SPTC1_HUMAN	SPTLC1	Serine palmitoyltransferase 1	18.6076	18.7339	18.7673	18.3249	18.21	18.4101
+	2.01011	0.731922	O15294	O15294;O15294-2;O15294-3;O15294-4;A0A8V8TPA3;A0A8V8TQ37;A0A8V8TQ64;A0A8V8TP17	OGT1_HUMAN	OGT	UDP-N-acetylglucosamine--peptide N-acetylglucosaminyltransferase 110 kDa subunit	19.0377	19.0971	19.1602	18.674	18.2038	18.2214
+	3.41953	3.04652	O15305	O15305;H3BV55;H3BPH4;O15305-2;A0A804HKA7	PMM2_HUMAN	PMM2	Phosphomannomutase 2	19.0521	18.7443	18.7927	16.2278	15.3397	15.882
+	3.59421	1.26483	O15347	O15347;E7ES08;E7EQU1;E9PES6	HMGB3_HUMAN	HMGB3	High mobility group protein B3	21.8305	21.6866	21.8041	20.5148	20.6674	20.3446
+	1.2975	0.55749	O15355	O15355	PPM1G_HUMAN	PPM1G	Protein phosphatase 1G	19.1737	18.7482	19.2786	18.554	18.6901	18.2839
+	2.62905	-0.321088	O15372	O15372;B3KS98;E5RJT0	EIF3H_HUMAN	EIF3H	Eukaryotic translation initiation factor 3 subunit H	25.9147	25.8995	25.8741	26.3007	26.1454	26.2055
+	5.29471	0.839216	O15381	O15381;E7EWK7;F8WF01;O15381-5;E9PH71;E9PGD8	NVL_HUMAN	NVL	Nuclear valosin-containing protein-like	22.6705	22.6666	22.73	21.8271	21.8785	21.844
+	1.59176	0.697369	O15392	O15392;H3BLT4;O15392-2;O15392-4;O15392-5;K7EMW2;A0A0B4J1S3	BIRC5_HUMAN	BIRC5	Baculoviral IAP repeat-containing protein 5	19.7518	19.8813	20.1878	19.1642	19.0246	19.5401
+	1.48679	0.506742	O15417	O15417;O15417-2;H7C0N9;H9KVB4	TNC18_HUMAN	TNRC18	Trinucleotide repeat-containing gene 18 protein	18.8534	18.418	18.7244	18.1397	18.0114	18.3244
+	2.55802	0.872625	O15427	O15427;J3KTM6;J3KTI8;J3QQS9;J3QQV2;J3QRA0;J3QSC3	MOT4_HUMAN	SLC16A3	Monocarboxylate transporter 4	21.1012	21.3604	21.5049	20.5202	20.3292	20.4993
+	2.58431	0.396134	O15504	O15504;O15504-2;C9JYA1;B4DT96	NUP42_HUMAN	NUP42	Nucleoporin NUP42	20.2484	20.2348	20.387	19.9178	19.9369	19.8271
+	2.42714	1.09534	O15511	O15511;O15511-2;B1ALC0	ARPC5_HUMAN	ARPC5	Actin-related protein 2/3 complex subunit 5	21.8539	21.9159	21.8751	20.8377	21.0688	20.4524
+	3.20919	-0.930523	O15514	O15514;E9PB93;E9PHV4	RPB4_HUMAN	POLR2D	DNA-directed RNA polymerase II subunit RPB4	19.1673	19.2025	19.2254	20.1898	20.2523	19.9448
+	1.22243	3.57439	O43149	O43149;O43149-3	ZZEF1_HUMAN	ZZEF1	Zinc finger ZZ-type and EF-hand domain-containing protein 1	19.5089	21.022	21.1371	19.1009	14.7108	17.1331
+	1.25999	0.511028	O43166;O43166-2;O43166-3	O43166;O43166-2;O43166-3;F5GYF8	SI1L1_HUMAN	SIPA1L1	Signal-induced proliferation-associated 1-like protein 1	18.8334	18.8709	18.5831	17.9617	18.5421	18.2504
+	1.00123	1.20165	O43167;O43167-2	O43167;A0A8V8TNA6;A0A8V8TNL7;A0A8V8TLS8;A0A8V8TLT3;A0A8V8TLV5;A0A8V8TMC2;O43167-2	ZBT24_HUMAN	ZBTB24	Zinc finger and BTB domain-containing protein 24	15.8717	16.3176	16.8302	14.5261	16.1074	14.781
+	4.1984	1.21506	O43175	O43175;A0A286YF22;A0A286YER3;A0A286YF34;A0A286YFL2;A0A286YFM8;A0A286YFB2;A0A286YFA2;A0A286YFC8;A0A2C9F2M7	SERA_HUMAN	PHGDH	D-3-phosphoglycerate dehydrogenase	22.6918	22.696	22.851	21.4711	21.6213	21.5011
+	2.37405	1.10013	O43237;O43237-2	O43237;O43237-2;B4E2E0	DC1L2_HUMAN	DYNC1LI2	Cytoplasmic dynein 1 light intermediate chain 2	19.9086	20.0787	20.1793	18.615	19.1272	19.124
+	3.53327	0.832098	O43242	O43242;O43242-2	PSMD3_HUMAN	PSMD3	26S proteasome non-ATPase regulatory subunit 3	20.4464	20.4773	20.6492	19.6309	19.713	19.7328
+	1.80353	-0.741423	O43248	O43248;J3KMZ0	HXC11_HUMAN	HOXC11	Homeobox protein Hox-C11	19.9503	19.3664	19.8105	20.3461	20.5218	20.4835
+	3.15158	0.738663	O43251-6;O43251-8	O43251;B0QYV1;A0A0G2JRD1;A0A0G2JRA5;O43251-2;O43251-3;O43251-5;O43251-6;O43251-8;S4R3K7;A0A8Q3WKT3;A0A8Q3SI58;O43251-10	RFOX2_HUMAN	RBFOX2	Isoform of O43251, Isoform 6 of RNA binding protein fox-1 homolog 2	21.4167	21.4455	21.388	20.7562	20.7531	20.525
+	2.23873	1.24384	O43264	O43264;O43264-2	ZW10_HUMAN	ZW10	Centromere/kinetochore protein zw10 homolog	18.6723	18.8002	19.2625	17.4235	17.9286	17.6512
+	3.28406	0.541211	O43290	O43290	SNUT1_HUMAN	SART1	U4/U6.U5 tri-snRNP-associated protein 1	21.5698	21.6283	21.571	21.0178	21.1451	20.9824
+	2.46842	0.945868	O43293	O43293	DAPK3_HUMAN	DAPK3	Death-associated protein kinase 3	19.6326	19.6088	19.5219	18.4831	18.5045	18.9383
+	2.31424	0.894314	O43314;O43314-2	O43314;D6RBU4;A0A8V8TMN4;O43314-2;A0A087WZV0	VIP2_HUMAN	PPIP5K2	Inositol hexakisphosphate and diphosphoinositol-pentakisphosphate kinase 2	19.4158	19.5817	19.4189	18.3219	18.5748	18.8368
+	2.01662	0.591631	O43324	O43324;O43324-2;D6RBD7;H0YAL7;C9J1V9	MCA3_HUMAN	EEF1E1	Eukaryotic translation elongation factor 1 epsilon-1	22.4687	22.1013	22.3544	21.7464	21.813	21.59
+	3.9275	0.306669	O43395	O43395	PRPF3_HUMAN	PRPF3	U4/U6 small nuclear ribonucleoprotein Prp3	22.5322	22.5807	22.5441	22.2263	22.2741	22.2366
+	1.25404	1.8994	O43399;O43399-2;O43399-3;O43399-4;O43399-5;O43399-7	O43399;O43399-2;O43399-3;O43399-4;O43399-5;O43399-6;O43399-7;A0A087WYR3;A0A087WZ51	TPD54_HUMAN	TPD52L2	Tumor protein D54	18.6271	18.7278	18.5238	17.1458	17.6897	15.3451
+	3.02796	0.503348	O43432;O43432-3	O43432;A0A8I5QJH9;A0A0U1RQK7;A0A8J9G7U8;O43432-3;O43432-4;A0A0A0MSA7;A0A804HJV5;A0A8I5KT99;A0A8I5KV92	IF4G3_HUMAN	EIF4G3	Eukaryotic translation initiation factor 4 gamma 3	20.8797	20.9294	20.9402	20.339	20.3812	20.5191
+	1.65789	-1.49768	O43435;O43435-2;O43435-3	O43435;O43435-2;O43435-3;A0A8V8TR38;A0A3B3IS18	TBX1_HUMAN	TBX1	T-box transcription factor TBX1	16.4953	15.5589	16.2611	17.4711	17.161	18.1762
+	4.14404	0.614134	O43463;O43463-2	O43463;O43463-2	SUV91_HUMAN	SUV39H1	Histone-lysine N-methyltransferase SUV39H1	19.51	19.4072	19.3982	18.8154	18.8225	18.8352
+	4.41216	0.561075	O43474;O43474-1;O43474-4	O43474;O43474-1;O43474-4	KLF4_HUMAN	KLF4	Krueppel-like factor 4	20.048	20.0663	20.1222	19.4943	19.507	19.5521
+	1.09477	-0.824721	O43482	O43482;H0YKL4	MS18B_HUMAN	OIP5	Protein Mis18-beta	15.3215	16.2557	15.1404	16.4877	16.4616	16.2424
+	4.23287	1.0775	O43491	O43491;A0A2R8Y5B3;O43491-2;O43491-3;O43491-4;E9PK52;E9PHY5;E9PII3	E41L2_HUMAN	EPB41L2	Band 4.1-like protein 2	20.3961	20.5351	20.4185	19.3095	19.4534	19.3543
+	3.87974	3.26604	O43516;O43516-3	O43516;E9PB87;A0A8V8TNJ8;O43516-2;O43516-3;O43516-4	WIPF1_HUMAN	WIPF1	WAS/WASL-interacting protein family member 1	19.3708	19.2641	18.9409	16.2565	15.618	15.9031
+	2.12539	0.964122	O43583	O43583	DENR_HUMAN	DENR	Density-regulated protein	21.6536	21.3499	21.4974	20.6835	20.7312	20.1938
+	2.81123	0.764444	O43592	O43592;F8WDU6	XPOT_HUMAN	XPOT	Exportin-T	19.7462	19.7484	19.9092	18.8811	19.1674	19.0621
+	1.42414	1.71486	O43615	O43615;M0QXU7	TIM44_HUMAN	TIMM44	Mitochondrial import inner membrane translocase subunit TIM44	19.0414	19.4263	19.2601	18.5927	16.7623	17.2282
+	2.0971	0.729747	O43633	O43633;M0R1L7;M0R1T5;M0QXX8	CHM2A_HUMAN	CHMP2A	Charged multivesicular body protein 2a	18.9288	18.877	19.2766	18.4338	18.3017	18.1575
+	1.83505	0.35716	O43663	O43663;O43663-2;O43663-3;O43663-4;H0YM42	PRC1_HUMAN	PRC1	Protein regulator of cytokinesis 1	20.9226	20.966	20.7685	20.5137	20.4281	20.6437
+	0.828015	1.78441	O43663-2	O43663-2;O43663-4	PRC1_HUMAN	PRC1	Isoform of O43663, Isoform 2 of Protein regulator of cytokinesis 1	17.9159	17.9638	18.2123	15.7132	14.8529	18.1727
+	2.65634	0.760938	O43670-2	O43670;J3KRB6;J3KRW6;J3KTL1;O43670-2;O43670-4;H0Y3M2;X6R4W8;J3QS27;J3QRS9	ZN207_HUMAN	ZNF207	Isoform of O43670, Isoform 2 of BUB3-interacting and GLEBS motif-containing protein ZNF207	21.2967	21.2653	21.093	20.625	20.4234	20.3238
+	3.37584	1.38066	O43681	O43681	GET3_HUMAN	GET3	ATPase GET3	18.8193	18.9428	18.8183	17.7054	17.2899	17.4432
+	3.48757	0.989161	O43684;O43684-2	O43684;O43684-2;J3QSX4;J3QT28	BUB3_HUMAN	BUB3	Mitotic checkpoint protein BUB3	22.019	21.733	21.8246	20.8608	20.8464	20.9018
+	2.83454	0.894292	O43707	O43707;H7C144;A0A8V8TL71;O43707-2;O43707-3;F5GXS2	ACTN4_HUMAN	ACTN4	Alpha-actinin-4	20.9682	20.7791	20.9751	19.9372	19.9001	20.2022
+	2.55205	-0.753231	O43709	O43709;F8WD87;F8WD67;E9PCQ7;O43709-2;O43709-3	BUD23_HUMAN	BUD23	Probable 18S rRNA (guanine-N(7))-methyltransferase	20.4384	20.6138	20.5971	21.1053	21.4327	21.3709
+	2.75898	-2.39505	O43719	O43719	HTSF1_HUMAN	HTATSF1	HIV Tat-specific factor 1	20.3832	19.5367	19.4552	22.2803	22.3403	21.9397
+	2.23828	0.800768	O43747;O43747-2	O43747;O43747-2	AP1G1_HUMAN	AP1G1	AP-1 complex subunit gamma-1	19.289	19.356	18.9845	18.5593	18.2321	18.436
+	1.8752	1.13667	O43765	O43765;K7EMD6;A0A7I2V2U2;A0A7I2V4T9;A0A7I2V588;A0A7I2V697;A0A7I2V5Z3	SGTA_HUMAN	SGTA	Small glutamine-rich tetratricopeptide repeat-containing protein alpha	17.0318	16.8376	17.2555	16.2994	15.4715	15.944
+	4.26903	1.39192	O43776	O43776	SYNC_HUMAN	NARS1	Asparagine--tRNA ligase, cytoplasmic	22.0082	21.8783	21.9087	20.4163	20.6407	20.5624
+	2.38251	0.803144	O43791	O43791	SPOP_HUMAN	SPOP	Speckle-type POZ protein	20.0391	19.8575	20.3039	19.292	19.181	19.3182
+	4.8709	1.23189	O43795	O43795;H7C2Y7;E9PDF6;O43795-2	MYO1B_HUMAN	MYO1B	Unconventional myosin-Ib	25.6214	25.6308	25.54	24.3795	24.2936	24.4234
+	3.4104	1.18497	O43809	O43809	CPSF5_HUMAN	NUDT21	Cleavage and polyadenylation specificity factor subunit 5	23.1715	23.2473	23.1144	22.1812	21.9598	21.8373
+	4.06649	1.0836	O43813	O43813;F8WDS9;E9PHS0	LANC1_HUMAN	LANCL1	Glutathione S-transferase LANCL1	20.9498	21.0002	21.1072	19.9417	20.0161	19.8487
+	1.08772	0.593437	O43815	O43815;O43815-2	STRN_HUMAN	STRN	Striatin	18.2865	18.7154	18.6556	17.9126	17.6057	18.3589
+	2.18023	1.1855	O43818	O43818	U3IP2_HUMAN	RRP9	U3 small nucleolar RNA-interacting protein 2	19.8388	20.0991	20.0995	18.9211	18.4223	19.1374
+	1.91786	0.834729	O43819	O43819	SCO2_HUMAN	SCO2	Protein SCO2 homolog, mitochondrial	17.7977	18.3488	18.2262	17.1359	17.4592	17.2733
+	2.94507	1.22488	O43823	O43823;A0A7P0T893	AKAP8_HUMAN	AKAP8	A-kinase anchor protein 8	22.0934	22.0359	21.8579	20.9061	20.8931	20.5133
+	4.19551	4.50971	O43852-8	O43852-2;O43852-4;O43852-7;O43852-8	CALU_HUMAN	CALU	Isoform of O43852, Isoform 8 of Calumenin	20.2031	20.1161	20.2229	15.1737	16.0309	15.8082
+	2.97422	0.690051	O43852;O43852-3	O43852;O43852-15;O43852-2;O43852-3;O43852-4;O43852-5;O43852-6;O43852-8;O43852-9;H0Y875	CALU_HUMAN	CALU	Calumenin	21.6198	21.5491	21.5603	20.9092	21.0092	20.7406
+	2.19466	0.889958	O43854;O43854-2	O43854;O43854-2	EDIL3_HUMAN	EDIL3	EGF-like repeat and discoidin I-like domain-containing protein 3	19.8132	20.0631	19.5865	18.7352	18.9924	19.0653
+	2.5884	1.0249	O43865	O43865;Q96HN2;O43865-2;H0Y8B3;Q96HN2-2;Q96HN2-3;Q96HN2-4	SAHH2_HUMAN	AHCYL1	S-adenosylhomocysteine hydrolase-like protein 1	19.1814	19.0843	19.1337	18.2868	18.2284	17.8094
+	1.91804	1.39298	O43869	O43869;A0A126GWK9	OR2T1_HUMAN	OR2T1	Olfactory receptor 2T1	26.9754	26.6901	26.4371	25.7104	25.442	24.7714
+	2.37785	0.770586	O43896	O43896	KIF1C_HUMAN	KIF1C	Kinesin-like protein KIF1C	19.7935	19.794	19.6615	19.0712	19.1314	18.7345
+	3.52475	-2.05999	O43900	O43900;H0Y413;O43900-2	PRIC3_HUMAN	PRICKLE3	Prickle planar cell polarity protein 3	15.9239	15.8351	15.9794	17.6719	17.9862	18.2603
+	1.2995	0.750096	O43913	O43913;O43913-2	ORC5_HUMAN	ORC5	Origin recognition complex subunit 5	20.1468	20.8267	20.203	19.9627	19.4827	19.4809
+	1.97824	0.419395	O43929	O43929;O43929-2;O43929-3	ORC4_HUMAN	ORC4	Origin recognition complex subunit 4	20.0019	19.8042	19.9359	19.6131	19.3649	19.5057
+	1.74165	0.980145	O43933	O43933;O43933-2;A0A0C4DG33	PEX1_HUMAN	PEX1	Peroxisomal ATPase PEX1	18.3238	18.6424	18.6547	17.8233	17.7544	17.1028
+	2.0972	0.875643	O60216	O60216;A0A8I5KWV3;E5RIN7;E5RJK5;E5RJW1;E5RFV8	RAD21_HUMAN	RAD21	Double-strand-break repair protein rad21 homolog	20.1128	20.1787	19.9164	19.269	19.4254	18.8866
+	3.51992	0.805616	O60231	O60231;A0A140T947	DHX16_HUMAN	DHX16	Pre-mRNA-splicing factor ATP-dependent RNA helicase DHX16	20.8442	20.8884	20.7207	20.0877	20.0225	19.9263
+	1.77635	0.445474	O60232	O60232;H0YEB6;G3V1B8	ZNRD2_HUMAN	ZNRD2	Protein ZNRD2	20.7085	20.8798	20.6082	20.3027	20.4166	20.1409
+	1.49464	0.747356	O60245	O60245;O60245-2;A0A8V8TM73;A0A8Q3SIA5;A0A8Q3SI47;A0A8Q3SI70;A0A8Q3SI92;A0A087X2C4	PCDH7_HUMAN	PCDH7	Protocadherin-7	18.7336	18.5087	18.027	17.7444	17.8054	17.4774
+	3.44946	0.526933	O60264	O60264;P28370;B7ZLQ5;A0A0A0MRP6;P28370-2	SMCA5_HUMAN	SMARCA5	SWI/SNF-related matrix-associated actin-dependent regulator of chromatin subfamily A member 5	23.5704	23.559	23.4335	23.0182	23.0011	22.9628
+	3.02022	1.40361	O60281;O60281-2	O60281;J3KNV1;O60281-2;A0A8V8TPI9	ZN292_HUMAN	ZNF292	Zinc finger protein 292	21.6137	21.4214	21.3785	20.2862	20.1204	19.7962
+	3.22496	0.619482	O60287	O60287	NPA1P_HUMAN	URB1	Nucleolar pre-ribosomal-associated protein 1	19.7208	19.631	19.8346	19.1132	19.0694	19.1453
+	1.84262	0.403509	O60306	O60306	AQR_HUMAN	AQR	RNA helicase aquarius	18.3475	18.2272	18.4581	17.9933	17.8001	18.0288
+	3.28235	0.905079	O60341;O60341-2	O60341;A0A8I5QJJ5;A0A8I5QKM3;A0A8I5QJR3;R4GMQ1;O60341-2;A0A8I5KSH0;A0A8I5KRB8;A0A8I5KVZ4;A0A8I5KV76;A0A8I5KXU4	KDM1A_HUMAN	KDM1A	Lysine-specific histone demethylase 1A	18.5607	18.5948	18.6738	17.7764	17.5407	17.7971
+	5.11081	0.838855	O60343;O60343-2;O60343-3	O60343;O60343-2;O60343-3	TBCD4_HUMAN	TBC1D4	TBC1 domain family member 4	19.25	19.2705	19.3284	18.4176	18.4725	18.4423
+	2.06282	0.288306	O60506-3	O60506;F6UXX1;B7Z645;A0A7I2YQN2;A0A7I2V2F2;A0A7I2V309;A0A7I2V4Z0;O60506-2;O60506-3;O60506-4;A0A7I2V5Q6	HNRPQ_HUMAN	SYNCRIP	Isoform of O60506, Isoform 3 of Heterogeneous nuclear ribonucleoprotein Q	21.5443	21.4432	21.3837	21.1012	21.231	21.1741
+	2.09459	0.371908	O60566;O60566-3	O60566;O60566-3;O60566-2	BUB1B_HUMAN	BUB1B	Mitotic checkpoint serine/threonine-protein kinase BUB1 beta	18.1876	17.976	18.1635	17.6664	17.762	17.7829
+	3.55303	4.54677	O60568	O60568;H7C2S8;H7C2V1	PLOD3_HUMAN	PLOD3	Multifunctional procollagen lysine hydroxylase and glycosyltransferase LH3	18.9948	18.846	18.7429	15.0086	13.7307	14.204
+	3.89287	1.43804	O60610	O60610;A0A2R8Y5N1;O60610-2;O60610-3	DIAP1_HUMAN	DIAPH1	Protein diaphanous homolog 1	20.0727	20.2655	20.1464	18.5684	18.761	18.8411
+	1.43061	0.785755	O60664;O60664-3;O60664-4	O60664;O60664-3;O60664-4;K7EL96;K7ER39;K7ERZ3	PLIN3_HUMAN	PLIN3	Perilipin-3	19.4984	19.6144	19.4925	18.5154	19.2537	18.4789
+	1.5135	2.83425	O60701	O60701;O60701-2;O60701-3	UGDH_HUMAN	UGDH	UDP-glucose 6-dehydrogenase	18.4321	18.4676	18.6635	17.2519	15.5325	14.276
+	4.53165	0.704395	O60716-3;O60716-5	O60716;O60716-2;O60716-3;O60716-4;O60716-5;O60716-6;O60716-7;O60716-8;O60716-9;C9JZR2;H0YC95;A0A804HIL4;A0A804HK15;A0A804HJM1;A0A669KB62;A0A669KB05;O60716-10;O60716-11;O60716-12;O60716-13;O60716-14;O60716-15;O60716-16;O60716-28;O60716-29;O60716-30;O60716-31;O60716-32;O60716-17;O60716-18;O60716-19;O60716-20;O60716-21;O60716-22;O60716-23;O60716-24;O60716-25;O60716-26;O60716-27	CTND1_HUMAN	CTNND1	Isoform of O60716, Isoform 1AC of Catenin delta-1	20.663	20.6312	20.559	19.8909	19.9143	19.9346
+	1.02592	1.38552	O60749;O60749-2	O60749;O60749-2	SNX2_HUMAN	SNX2	Sorting nexin-2	16.856	16.9836	17.8411	16.0498	16.6788	14.7956
+	4.18793	0.528502	O60762	O60762;H0Y368;A0A804HIB3;A0A804HIK9;Q5QPJ9;Q5QPK2	DPM1_HUMAN	DPM1	Dolichol-phosphate mannosyltransferase subunit 1	20.8367	20.8713	20.841	20.3733	20.2753	20.3149
+	3.11893	1.54499	O60828;O60828-2;O60828-5	O60828;O60828-2;O60828-4;O60828-5;H7C053	PQBP1_HUMAN	PQBP1	Polyglutamine-binding protein 1	22.1992	22.0837	22.0054	20.5153	20.8397	20.2983
+	1.54209	0.312899	O60841	O60841;A0A087WUT6	IF2P_HUMAN	EIF5B	Eukaryotic translation initiation factor 5B	23.8614	23.7645	23.5842	23.5133	23.4003	23.3578
+	1.84108	0.736	O60869	O60869;O60869-2;O60869-3	EDF1_HUMAN	EDF1	Endothelial differentiation-related factor 1	23.0998	22.8086	23.0195	22.0064	22.1794	22.5341
+	4.21438	1.03917	O60884	O60884	DNJA2_HUMAN	DNAJA2	DnaJ homolog subfamily A member 2	21.9098	21.8387	21.9058	20.8472	20.7507	20.9389
+	1.75561	0.673644	O60885	O60885	BRD4_HUMAN	BRD4	Bromodomain-containing protein 4	19.2124	19.2594	19.0382	18.4565	18.2428	18.7897
+	2.02637	0.329906	O60942	O60942;O60942-2;O60942-3;O60942-4	MCE1_HUMAN	RNGTT	mRNA-capping enzyme	20.2012	20.3621	20.2652	19.9159	19.8741	20.0487
+	2.83589	0.979635	O75044	O75044;Q7Z6B7;A0A075B7B5;B7ZM87;Q7Z6B7-2;G5EA48;Q5VZB4	SRGP2_HUMAN	SRGAP2	SLIT-ROBO Rho GTPase-activating protein 2	19.5134	19.7618	19.6026	18.8371	18.6159	18.486
+	2.15182	2.44087	O75054	O75054;O75054-2	IGSF3_HUMAN	IGSF3	Immunoglobulin superfamily member 3	17.9907	18.2499	18.1586	16.281	16.0409	14.7547
+	1.9407	1.00576	O75083	O75083;D6RD66;A0A8V8TQK0;A0A8V8TQ74;A0A8V8TP22;A0A8V8TP31;A0A8V8TNT7;A0A8V8TNU2	WDR1_HUMAN	WDR1	WD repeat-containing protein 1	19.4748	19.0798	19.6004	18.0796	18.4115	18.6466
+	2.34327	1.32066	O75116	O75116;E9PF63;A0A8V8TL82;A0A8V8TL90	ROCK2_HUMAN	ROCK2	Rho-associated protein kinase 2	19.0581	19.1498	19.1669	17.7179	17.4611	18.2338
+	1.36596	0.766722	O75122	O75122;J3KR49;E3W994;A0A804HJG7	CLAP2_HUMAN	CLASP2	CLIP-associating protein 2	16.0958	15.9496	16.5724	15.6029	15.0744	15.6403
+	3.87406	0.914691	O75122-3	O75122;J3KR49;A0A0U1RQI6;E7EW49;E7ERI8;O75122-2;O75122-3;E3W994;A0A804HJG7;E7ENG2;B3KR06	CLAP2_HUMAN	CLASP2	Isoform of O75122, Isoform 3 of CLIP-associating protein 2	19.4859	19.3923	19.3849	18.5166	18.5949	18.4075
+	0.920902	1.53395	O75123-2	O75123;O75123-2	ZN623_HUMAN	ZNF623	Isoform of O75123, Isoform 2 of Zinc finger protein 623	18.2114	17.1378	18.4177	17.6948	15.4824	15.9878
+	3.2025	1.00866	O75128-2	O75128;J3KR05;O75128-2;O75128-3;O75128-6;O75128-7;H7C1N2	COBL_HUMAN	COBL	Isoform of O75128, Isoform 2 of Protein cordon-bleu	19.2846	19.5682	19.4166	18.2872	18.4743	18.4819
+	5.10339	-0.666594	O75147	O75147;A6NN50;O75147-1;O75147-2;O75147-4	OBSL1_HUMAN	OBSL1	Obscurin-like protein 1	20.0956	20.0785	20.027	20.7466	20.7157	20.7386
+	1.07006	3.6208	O75150	O75150;H3BP71;O75150-4;A0A087WTK2	BRE1B_HUMAN	RNF40	E3 ubiquitin-protein ligase BRE1B	20.0713	19.4967	19.7145	14.0634	15.112	19.2447
+	2.18215	0.453814	O75152	O75152;A0A8V8TLD8;A0A1B0GTU1;P0DQW0;E9PBY7;E9PQ61	ZC11A_HUMAN	ZC3H11A	Zinc finger CCCH domain-containing protein 11A	19.1003	19.2904	19.3423	18.7394	18.7471	18.8852
+	3.1318	0.849405	O75153	O75153;K7EIG1;A0A494C0R8;I3L2B0	CLU_HUMAN	CLUH	Clustered mitochondria protein homolog	20.7986	20.7651	20.9392	19.8376	20.0475	20.0695
+	3.10177	0.342711	O75165	O75165;A0A3B3IRM0	DJC13_HUMAN	DNAJC13	DnaJ homolog subfamily C member 13	23.0081	22.9465	23.0167	22.6791	22.5873	22.6768
+	3.27532	1.01706	O75175	O75175;H0Y5X7;A0A0G2JPP0;A0A0G2JN65;H7C5J4	CNOT3_HUMAN	CNOT3	CCR4-NOT transcription complex subunit 3	20.5642	20.455	20.5747	19.4107	19.699	19.4331
+	0.897352	-0.821419	O75182;O75182-2	O75182;M0QYC5;O75182-2	SIN3B_HUMAN	SIN3B	Paired amphipathic helix protein Sin3b	15.1356	16.2561	16.0167	16.4362	16.3035	17.1329
+	1.74086	0.262431	O75190	Q7Z6W7;O75190;Q8WWF6;C9J2C4;C9J2P2;F8WCZ4;C9JN01;C9JDR7;C9JDX6;C9JB42;A0A0J9YX62;O75190-2;O75190-3;E9PH18	DNJB6_HUMAN	DNAJB6	DnaJ homolog subfamily B member 6	21.2223	21.3236	21.1994	20.9616	21.0934	20.9031
+	1.82665	0.806336	O75223	O75223;O75223-3;M0QZK8	GGCT_HUMAN	GGCT	Gamma-glutamylcyclotransferase	19.5426	19.7548	19.1891	18.9006	18.616	18.5508
+	2.314	1.21911	O75251;O75251-2	O75251;O75251-2;F5GXJ1;F5H5N1	NDUS7_HUMAN	NDUFS7	NADH dehydrogenase [ubiquinone] iron-sulfur protein 7, mitochondrial	18.1393	18.5749	18.8284	17.4491	17.1912	17.245
+	0.780084	2.90399	O75323	O75323;H7C333	NIPS2_HUMAN	NIPSNAP2	Protein NipSnap homolog 2	18.4632	19.3736	18.7418	13.5828	19.2391	15.0446
+	2.13277	0.496865	O75330;O75330-2;O75330-3	O75330;O75330-2;O75330-3;O75330-4	HMMR_HUMAN	HMMR	Hyaluronan mediated motility receptor	19.1986	19.1698	18.9399	18.4956	18.6717	18.6505
+	1.53077	1.16402	O75340	O75340;A0A024QZ42;O75340-2	PDCD6_HUMAN	PDCD6	Programmed cell death protein 6	19.3402	19.1699	18.4889	17.9611	18.1663	17.3795
+	2.18534	1.81113	O75348	O75348;A0A7I2V375;A0A7I2V3Q6;A0A7I2V4K4	VATG1_HUMAN	ATP6V1G1	V-type proton ATPase subunit G 1	16.8501	17.0585	17.3756	15.6468	14.6601	15.544
+	4.36453	0.356248	O75367-1;O75367-3	O75367;O75367-1;O75367-3;B4DJC3	H2AY_HUMAN	MACROH2A1	Isoform of O75367, Isoform 2 of Core histone macro-H2A.1	27.2164	27.2316	27.1915	26.8842	26.8353	26.8513
+	3.53516	1.17621	O75369-8	O75369;O75369-2;O75369-3;O75369-4;O75369-5;O75369-6;O75369-7;O75369-8;O75369-9;A0A804HK76;A0A804HL72;E7EN95	FLNB_HUMAN	FLNB	Isoform of O75369, Isoform 8 of Filamin-B	20.5225	20.4718	20.6596	19.3488	19.2481	19.5285
+	1.45421	0.451555	O75382;O75382-2	O75382;O75382-2;O75382-3;O75382-4	TRIM3_HUMAN	TRIM3	Tripartite motif-containing protein 3	19.0055	19.0283	18.6223	18.4205	18.5415	18.3394
+	3.62749	1.59286	O75386-2	O75386;O75386-2	TULP3_HUMAN	TULP3	Isoform of O75386, Isoform 2 of Tubby-related protein 3	20.3276	20.3374	20.2911	18.8817	18.8209	18.475
+	1.72279	1.18018	O75390	O75390;H0YIC4;B4DJV2;A0A0C4DGI3	CISY_HUMAN	CS	Citrate synthase, mitochondrial	19.9154	19.9175	20.2317	19.094	19.1698	18.2603
+	2.05699	0.653414	O75396	O75396	SC22B_HUMAN	SEC22B	Vesicle-trafficking protein SEC22b	19.0805	19.503	19.3752	18.6867	18.7496	18.5622
+	2.44027	0.353853	O75400	O75400;A0A7N4I394;O75400-2;O75400-3;A0A8V8TM61;A0A8V8TM87;A0A8Q3SIG7;F5H578	PR40A_HUMAN	PRPF40A	Pre-mRNA-processing factor 40 homolog A	23.1034	23.0247	22.9844	22.7468	22.7103	22.5937
+	1.81258	0.775557	O75436	O75436	VP26A_HUMAN	VPS26A	Vacuolar protein sorting-associated protein 26A	19.0341	19.1791	19.331	18.7475	18.2256	18.2445
+	2.57627	0.573276	O75475	O75475	PSIP1_HUMAN	PSIP1	PC4 and SFRS1-interacting protein	22.0954	22.0736	21.9147	21.514	21.5245	21.3254
+	3.09597	1.0144	O75477	O75477	ERLN1_HUMAN	ERLIN1	Erlin-1	18.3535	18.3874	18.4699	17.6006	17.2816	17.2854
+	1.31482	0.81416	O75486;O75486-4	O75486;A0A1B0GVT7;A0A6I8PRV1;O75486-4	SUPT3_HUMAN	SUPT3H	Transcription initiation protein SPT3 homolog	19.4707	19.342	19.5912	18.2639	19.1991	18.4984
+	2.63308	0.401649	O75530;O75530-3	O75530;A0A5F9ZI63;O75530-2;O75530-3	EED_HUMAN	EED	Polycomb protein EED	20.505	20.5518	20.4717	20.0619	20.2144	20.0472
+	1.38594	0.905378	O75531	O75531	BAF_HUMAN	BANF1	Barrier-to-autointegration factor	25.4829	25.9396	25.2815	24.4515	24.4055	25.1309
+	3.12408	0.365492	O75533	O75533	SF3B1_HUMAN	SF3B1	Splicing factor 3B subunit 1	24.1717	24.2587	24.1439	23.8334	23.7901	23.8544
+	2.53708	0.598928	O75534	O75534;A0A8I5QJA6;A0A8I5QKX0;E9PNG3;E9PLT0;O75534-2;O75534-3;O75534-4;A0A8I5KPQ8;A0A8I5KPJ6;A0A8I5KPC0;A0A8I5KS07;A0A8I5KTQ3;A0A8I5KW72;A0A8I5KV85;A0A8I5KW29;A0A8I5KYL8;A0A8I5KWW0;A0A8I5KXH5;A0A8I5KXL1	CSDE1_HUMAN	CSDE1	Cold shock domain-containing protein E1	20.3205	20.2036	20.4753	19.735	19.6504	19.8173
+	2.16379	-0.330254	O75569	O75569;O75569-2;O75569-3;F8WEG8;C9JMM3;G5E9Q4;A0A7I2YQ87;A0A7I2V2P4;A0A7I2V315;A0A7I2V3L6;A0A7I2V593;A0A7I2V5C2;A0A7I2V5H3	PRKRA_HUMAN	PRKRA	Interferon-inducible double-stranded RNA-dependent protein kinase activator A	22.9711	22.9634	22.8813	23.232	23.1926	23.3819
+	2.51343	0.526453	O75607	O75607	NPM3_HUMAN	NPM3	Nucleoplasmin-3	23.9651	23.9143	24.0717	23.3511	23.4368	23.5839
+	1.37545	0.918457	O75608;O75608-2	O75608;O75608-2;B4DP64;A0A087X1K9;E5RGR0	LYPA1_HUMAN	LYPLA1	Acyl-protein thioesterase 1	19.4902	18.8007	18.9514	18.5584	18.1704	17.7581
+	2.00642	0.628196	O75616	O75616;O75616-2;J3QRV9;J3QSB2	ERAL1_HUMAN	ERAL1	GTPase Era, mitochondrial	19.1471	19.0522	19.498	18.6156	18.6101	18.5871
+	1.53336	0.732323	O75638-2	O75638;O75638-2	CTAG2_HUMAN	CTAG2	Isoform of O75638, Isoform LAGE-1A of Cancer/testis antigen 2	18.72	18.8723	19.3233	17.9906	18.3371	18.3911
+	3.11703	0.376307	O75643	O75643;A0A494C1A5	U520_HUMAN	SNRNP200	U5 small nuclear ribonucleoprotein 200 kDa helicase	22.3451	22.2999	22.2263	21.9523	21.9122	21.8778
+	2.18556	0.364305	O75665	O75665;O75665-3	OFD1_HUMAN	OFD1	Centriole and centriolar satellite protein OFD1	18.3551	18.5376	18.4256	17.996	18.0751	18.1542
+	1.35079	3.50956	O75676;O75676-2	O75676;A0A0A6YYC0;E9PJN1;O75676-2	KS6A4_HUMAN	RPS6KA4	Ribosomal protein S6 kinase alpha-4	17.938	17.4934	17.0236	12.0691	13.7077	16.1497
+	3.55971	0.396502	O75691	O75691	UTP20_HUMAN	UTP20	Small subunit processome component 20 homolog	20.4777	20.5434	20.5403	20.0876	20.1121	20.1722
+	1.58051	0.558342	O75694	O75694;O75694-2;E9PF10	NU155_HUMAN	NUP155	Nuclear pore complex protein Nup155	19.9659	20.3111	20.4429	19.577	19.6334	19.8345
+	5.50662	1.45299	O75695	O75695	XRP2_HUMAN	RP2	Protein XRP2	22.0492	22.1045	22.1446	20.608	20.6315	20.6999
+	1.28759	3.3372	O75717	O75717;O75717-2	WDHD1_HUMAN	WDHD1	WD repeat and HMG-box DNA-binding protein 1	18.833	18.3277	19.2899	17.8347	14.4984	14.1058
+	3.66168	1.33986	O75781	O75781;O75781-2	PALM_HUMAN	PALM	Paralemmin-1	23.6778	23.8037	23.7334	22.2989	22.5955	22.3008
+	3.08296	1.19186	O75781-2	O75781-2;A0A087WWY4	PALM_HUMAN	PALM	Isoform of O75781, Isoform 2 of Paralemmin-1	18.4962	18.6813	18.4727	17.1712	17.3389	17.5646
+	2.26649	1.18877	O75794	O75794;H7BZW7;X6RA30;X6RF82	CD123_HUMAN	CDC123	Cell division cycle protein 123 homolog	20.6759	20.7017	20.5819	19.0521	19.571	19.7701
+	1.81978	0.323135	O75817	O75817;C9JYM0	POP7_HUMAN	POP7	Ribonuclease P protein subunit p20	21.6114	21.4652	21.4237	21.1917	21.2643	21.0749
+	1.67574	2.65218	O75843	O75843;H0YJ08	AP1G2_HUMAN	AP1G2	AP-1 complex subunit gamma-like 2	17.7971	18.1299	16.3112	13.8778	15.3787	15.0252
+	2.54986	0.99726	O75874	O75874	IDHC_HUMAN	IDH1	Isocitrate dehydrogenase [NADP] cytoplasmic	20.2386	20.0404	20.1158	19.2032	19.3368	18.863
+	1.74085	0.690156	O75880	O75880;J3QL56	SCO1_HUMAN	SCO1	Protein SCO1 homolog, mitochondrial	19.7018	20.0877	20.2607	19.3439	19.4356	19.2003
+	1.7059	0.552106	O75909;O75909-4	O75909;O75909-1;O75909-2;O75909-4;G3V5E1;G3V2Q3;G3V235	CCNK_HUMAN	CCNK	Cyclin-K	20.661	20.7881	20.9781	20.4729	20.2128	20.0852
+	1.50859	1.71258	O75915	O75915	PRAF3_HUMAN	ARL6IP5	PRA1 family protein 3	18.2102	18.4011	18.1872	16.6999	17.373	15.5878
+	1.08433	-2.42466	O75925	O75925;O75925-2	PIAS1_HUMAN	PIAS1	E3 SUMO-protein ligase PIAS1	14.7572	18.1343	15.2851	18.4572	18.3756	18.6177
+	1.7567	0.248658	O75934	O75934	SPF27_HUMAN	BCAS2	Pre-mRNA-splicing factor SPF27	22.5116	22.3606	22.4946	22.1887	22.2875	22.1446
+	3.50276	1.27938	O75935;O75935-3	O75935;A0A0A0MRV8;X6RCK5;X6RA56;X6RLR1;O75935-2;O75935-3	DCTN3_HUMAN	DCTN3	Dynactin subunit 3	19.6132	19.9904	19.7606	18.495	18.504	18.5272
+	1.74877	0.393602	O75940	O75940	SPF30_HUMAN	SMNDC1	Survival of motor neuron-related-splicing factor 30	18.3924	18.6075	18.4466	18.0914	18.2226	17.9517
+	2.16303	2.88545	O75947	O75947	ATP5H_HUMAN	ATP5PD	ATP synthase subunit d, mitochondrial	18.7254	19.8492	20.2762	17.1549	16.101	16.9386
+	4.02545	1.17326	O75955	O75955;O75955-2;A0A140T9W4;A0A140T9R1;A0A140T974	FLOT1_HUMAN	FLOT1	Flotillin-1	22.3447	22.4478	22.5829	21.2299	21.3071	21.3186
+	1.25962	-0.469482	O75962	O75962;O75962-2;O75962-4;O75962-5;E7EWP2;E7EPJ7;A0A8V8TLX5;F5H228	TRIO_HUMAN	TRIO	Triple functional domain protein	18.1993	18.5857	18.2453	18.5619	18.9381	18.9387
+	2.81447	0.823046	O75964	O75964;A0A8I5KSW3;A0A8I5KT86;A0A8I5KSQ4;A0A3B3ITX4	ATP5L_HUMAN	ATP5MG	ATP synthase subunit g, mitochondrial	19.8123	19.9138	20.1299	19.036	19.2144	19.1364
+	1.75756	2.39344	O76003	O76003	GLRX3_HUMAN	GLRX3	Glutaredoxin-3	18.5938	18.4555	18.6808	15.2966	17.351	15.9021
+	2.86288	0.428989	O76021	O76021;I3L3U9;I3L3C4;I3L234;J3QSV6	RL1D1_HUMAN	RSL1D1	Ribosomal L1 domain-containing protein 1	24.9826	25.0486	25.0888	24.6432	24.6666	24.5233
+	5.87024	1.11029	O76031	O76031;H0YM48	CLPX_HUMAN	CLPX	ATP-dependent Clp protease ATP-binding subunit clpX-like, mitochondrial	19.0913	19.0572	19.0182	17.9686	17.9307	17.9365
+	1.2631	0.374959	O76041	O76041	NEBL_HUMAN	NEBL	Nebulette	19.7318	19.6966	20.0845	19.4852	19.5601	19.3426
+	1.86592	3.06102	O76070	O76070	SYUG_HUMAN	SNCG	Gamma-synuclein	18.8833	18.4641	18.9554	14.7563	17.0985	15.265
+	1.68448	0.321053	O76071	O76071	CIAO1_HUMAN	CIAO1	Probable cytosolic iron-sulfur protein assembly protein CIAO1	19.3695	19.2728	19.428	18.9197	19.0147	19.1728
+	1.71764	2.38044	O76081-6	O76081;O76081-2;O76081-3;O76081-4;O76081-5;O76081-6;B3KSW4	RGS20_HUMAN	RGS20	Isoform of O76081, Isoform 5 of Regulator of G-protein signaling 20	17.3526	17.0922	17.3811	13.6548	15.4887	15.5411
+	5.06185	0.393493	O76094	O76094;O76094-2;R4GNC1	SRP72_HUMAN	SRP72	Signal recognition particle subunit SRP72	24.2977	24.284	24.3217	23.9193	23.9116	23.8921
+	2.67355	0.225015	O94761	O94761;V9GZ64;A0A087X072	RECQ4_HUMAN	RECQL4	ATP-dependent DNA helicase Q4	20.4568	20.534	20.5464	20.2804	20.3164	20.2653
+	3.32272	0.781242	O94763	O94763;I3L130	RMP_HUMAN	URI1	Unconventional prefoldin RPB5 interactor 1	20.1072	20.0569	20.0412	19.2269	19.4309	19.2038
+	2.27526	0.395517	O94776	O94776	MTA2_HUMAN	MTA2	Metastasis-associated protein MTA2	21.7596	21.584	21.5263	21.2282	21.201	21.2541
+	2.09837	1.62916	O94806	O94806;Q9BZL6;Q9BZL6-2;Q9BZL6-3	KPCD3_HUMAN	PRKD3	Serine/threonine-protein kinase D3	19.2695	19.4015	19.3909	17.7376	17.1488	18.288
+	3.00908	1.12096	O94842;O94842-2;O94842-3	O94842;O94842-2;O94842-3;A0A669KB71	TOX4_HUMAN	TOX4	TOX high mobility group box family member 4	17.9632	17.6573	17.816	16.8725	16.6478	16.5533
+	4.80035	1.15431	O94854	Q9UPN3;O94854;H3BQK9;H3BPE1;H0Y390;A0A590UJG2;A0A804HL78;Q9UPN3-2;Q9UPN3-3;Q9UPN3-4;Q9UPN3-5;A0A7P0MQR8	K0754_HUMAN	MACF1	Isoform of Q9UPN3, Microtubule-actin cross-linking factor 1, isoforms 6/7	20.4023	20.4799	20.5001	19.2394	19.3621	19.3179
+	2.36943	2.21478	O94875;O94875-10;O94875-11;O94875-12;O94875-2;O94875-3;O94875-4;O94875-5;O94875-8;O94875-9	O94875;O94875-10;O94875-11;O94875-12;O94875-2;O94875-3;O94875-4;O94875-5;O94875-7;O94875-8;O94875-9;H7BXR3;H7C1R7;A0A8V8TNC1;A0A8V8TMA7;A0A8V8TMC7;A0A8V8TMD6;A0A8Q3WLU7;A0A8Q3WKF2;A0A8Q3WKH1;A0A8Q3WKK4	SRBS2_HUMAN	SORBS2	Sorbin and SH3 domain-containing protein 2	17.6895	17.2869	17.5255	15.1947	14.7122	15.9507
+	3.09123	0.358049	O94880	O94880;B4DG57;O94880-1;O94880-2	PHF14_HUMAN	PHF14	PHD finger protein 14	22.2638	22.3753	22.3449	21.9798	22.0005	21.9296
+	1.99023	0.546745	O94887;O94887-2;O94887-3	O94887;O94887-2;O94887-3	FARP2_HUMAN	FARP2	FERM, ARHGEF and pleckstrin domain-containing protein 2	19.2518	19.3833	19.4461	18.9366	18.8995	18.6049
+	0.788764	1.60492	O94905	O94905;E5RHW4;E5RJ09	ERLN2_HUMAN	ERLIN2	Erlin-2	19.9721	19.7595	20.1046	19.2993	19.2489	16.4732
+	3.37107	0.366988	O94906	O94906;O94906-2	PRP6_HUMAN	PRPF6	Pre-mRNA-processing factor 6	21.9092	21.7948	21.8352	21.4917	21.4682	21.4782
+	1.8231	0.466381	O94913	O94913;A0A8I5KX04	PCF11_HUMAN	PCF11	Pre-mRNA cleavage complex 2 protein Pcf11	18.2377	18.0523	18.3649	17.6183	17.7873	17.8502
+	6.02451	-2.48774	O94915	O94915;A0A286YEZ9;H0Y9X0;A0A2C9F2R7	FRYL_HUMAN	FRYL	Protein furry homolog-like	19.2462	19.3811	19.4027	21.8408	21.8155	21.8368
+	0.967094	2.05745	O94919	O94919	ENDD1_HUMAN	ENDOD1	Endonuclease domain-containing 1 protein	18.5766	18.0673	17.5191	17.3816	16.4275	14.1815
+	1.73249	2.208	O94952;O94952-1	O94952;O94952-1;H0YIE9	FBX21_HUMAN	FBXO21	F-box only protein 21	17.496	17.6533	17.9795	16.5261	15.3711	14.6077
+	4.66331	0.502144	O94964-2	O94964;O94964-2;O94964-3;H0YDM2	SOGA1_HUMAN	SOGA1	Isoform of O94964, Isoform 2 of Protein SOGA1	21.8457	21.8804	21.8933	21.3515	21.4044	21.3572
+	2.94339	1.7136	O94966-4;O94966-6	O94966;E7ESU0;O94966-3;O94966-4;O94966-5;O94966-6;O94966-7;A0A590UK03;A0A0A0MR08;A0A8V8TN96;A0A8I5KRW4;A0A8I5KT08;A0A8I5KV50;A0A8I5KXK1	UBP19_HUMAN	USP19	Isoform of O94966, Isoform 4 of Ubiquitin carboxyl-terminal hydrolase 19	21.06	20.9243	20.8019	19.4062	19.4079	18.8312
+	4.08482	0.91321	O94979;O94979-2;O94979-3;O94979-8;O94979-9	O94979;D6REX3;D6RHZ5;H0YAB3;H0Y9K1;H0Y8V7;O94979-2;O94979-3;O94979-4;O94979-5;O94979-6;O94979-7;O94979-8;O94979-9;O94979-10;H7BXG7	SC31A_HUMAN	SEC31A	Protein transport protein Sec31A	19.7775	19.956	19.9263	18.9886	18.9734	18.9582
+	0.93048	2.32767	O94983;O94983-2;O94983-3;O94983-4;O94983-6	O94983;O94983-3;O94983-4;O94983-6;O94983-2;I3L3V0;I3L3W6;I3L2A1;I3L146	CMTA2_HUMAN	CAMTA2	Calmodulin-binding transcription activator 2	19.504	19.2797	20.0925	17.9749	18.8516	15.0666
+	2.93494	0.442905	O94992	O94992	HEXI1_HUMAN	HEXIM1	Protein HEXIM1	22.0676	21.9759	21.9292	21.4865	21.6069	21.5506
+	2.61902	0.785056	O95059	O95059	RPP14_HUMAN	RPP14	Ribonuclease P protein subunit p14	20.5548	20.4461	20.354	19.7524	19.4687	19.7786
+	2.77207	2.97401	O95067	O95067;H1UBN3	CCNB2_HUMAN	CCNB2	G2/mitotic-specific cyclin-B2	18.3483	18.2254	18.2051	14.7499	15.0531	16.0538
+	2.21198	-0.384146	O95071;O95071-2	O95071;O95071-2;E7EMW7	UBR5_HUMAN	UBR5	E3 ubiquitin-protein ligase UBR5	19.9855	20.1566	20.1857	20.4492	20.4638	20.5672
+	2.49754	0.3047	O95084	O95084;O95084-2	PRS23_HUMAN	PRSS23	Serine protease 23	20.8923	20.8706	20.7588	20.5449	20.5731	20.4896
+	2.15336	0.298026	O95163	O95163;A0A6Q8PFB7;A0A6Q8PG86;A0A6Q8PGW3;A0A6Q8PEX6;A0A6Q8PHF4;A0A6Q8PHI5;F5H2T0	ELP1_HUMAN	ELP1	Elongator complex protein 1	21.4819	21.6288	21.5901	21.3123	21.1918	21.3026
+	0.855575	1.41874	O95168;O95168-2	O95168;C9JXQ9;O95168-2;F2Z3P9	NDUB4_HUMAN	NDUFB4	NADH dehydrogenase [ubiquinone] 1 beta subcomplex subunit 4	18.7571	18.2844	18.1024	17.8481	15.4808	17.5588
+	1.74933	2.63736	O95202	O95202	LETM1_HUMAN	LETM1	Mitochondrial proton/calcium exchanger protein	17.9207	17.9524	18.1329	14.2659	16.5967	15.2314
+	3.0886	0.655993	O95218-2	O95218;O95218-2	ZRAB2_HUMAN	ZRANB2	Isoform of O95218, Isoform 2 of Zinc finger Ran-binding domain-containing protein 2	24.5008	24.619	24.566	24.0059	23.924	23.7877
+	4.06934	0.714352	O95232	O95232;J3KPP4;D6RDI2;C9JL41;H7C5U7;O95232-2	LC7L3_HUMAN	LUC7L3	Luc7-like protein 3	23.2067	23.3228	23.2382	22.5831	22.49	22.5515
+	2.41108	0.788098	O95235	O95235;D6RBN1;D6R9E4	KI20A_HUMAN	KIF20A	Kinesin-like protein KIF20A	19.4635	19.5575	19.6296	18.7237	18.5723	18.9904
+	2.54256	0.693123	O95239	O95239;Q2VIQ3;O95239-2	KIF4A_HUMAN	KIF4A	Chromosome-associated kinesin KIF4A	20.292	20.322	20.1434	19.6434	19.6571	19.3776
+	1.95727	0.713968	O95248-4;O95248-5	O95248;A0A8J8YTQ8;A0A8I5KR05;A0A8I5KU87;A0A8I5KUE4;A0A8I5KTI7;A0A8I5KTN1;A0A8I5KW56;A0A8I5KVF2;A0A8I5KYG9;A0A8I5KZ29;A0A8I5KXX8;A0A8I5KY61;A0A8I5KXN1;O95248-4;O95248-5	MTMR5_HUMAN	SBF1	Isoform of O95248, Isoform 4 of Myotubularin-related protein 5	18.2714	18.2618	18.2838	17.8626	17.489	17.3236
+	3.3548	0.501536	O95251;O95251-4	O95251;E7EUP3;O95251-2;O95251-3;O95251-4;O95251-5	KAT7_HUMAN	KAT7	Histone acetyltransferase KAT7	21.5159	21.5243	21.3974	20.9768	21.0185	20.9378
+	0.798944	1.69347	O95260-2	O95260;A0A8I5QKV3;F8WAC9;O95260-2;A0A8I5KNT9;A0A8I5KNV5;A0A8I5KQ75;A0A8I5KS65;A0A8I5KSC8;A0A8I5KT53;A0A8I5KTH0;A0A8I5KWA6;A0A8I5KWU7;A0A8I5KWF1;A0A8I5KVR2;A0A8I5KVF5;A0A8I5KZ10;A0A8I5KZ24;A0A8I5KZ28;A0A8I5KYL1;A0A8I5KXC6;A0A8I5KXF6;A0A8I5KX91;A0A8I5KXU0;F5GXE4	ATE1_HUMAN	ATE1	Isoform of O95260, Isoform ATE1-2 of Arginyl-tRNA--protein transferase 1	18.8768	18.5119	18.2896	17.8965	17.7627	14.9387
+	1.92969	0.992056	O95292	O95292;O95292-2;E5RK64	VAPB_HUMAN	VAPB	Vesicle-associated membrane protein-associated protein B/C	17.7882	18.0297	18.1364	16.8911	17.3803	16.7067
+	2.29296	0.860976	O95295	O95295	SNAPN_HUMAN	SNAPIN	SNARE-associated protein Snapin	18.0216	17.9302	18.4253	17.3071	17.2127	17.2743
+	3.11819	1.33097	O95297;O95297-2	O95297;O95297-2;O95297-4	MPZL1_HUMAN	MPZL1	Myelin protein zero-like protein 1	19.8385	19.9127	20.0886	18.5264	18.4608	18.8596
+	1.87947	3.69017	O95302	O95302;O95302-3	FKBP9_HUMAN	FKBP9	Peptidyl-prolyl cis-trans isomerase FKBP9	18.9567	18.8035	18.9716	14.2518	14.4583	16.9511
+	1.14999	0.470874	O95340;O95340-2	O95340;O95340-2	PAPS2_HUMAN	PAPSS2	Bifunctional 3'-phosphoadenosine 5'-phosphosulfate synthase 2	18.0939	18.1422	18.4051	18.0005	17.7968	17.4313
+	5.18087	1.14014	O95347	O95347;O95347-2	SMC2_HUMAN	SMC2	Structural maintenance of chromosomes protein 2	21.699	21.6362	21.5798	20.5251	20.4831	20.4864
+	4.16282	1.20235	O95359-3	O95359;E9PBC6;O95359-1;O95359-2;O95359-3;O95359-5;O95359-6;D6RAA5;H0Y911;Q4VXL4;Q4VXL8;E9PGB3;E7EMZ9	TACC2_HUMAN	TACC2	Isoform of O95359, Isoform 3 of Transforming acidic coiled-coil-containing protein 2	21.1284	21.1787	21.2005	19.833	20.0269	20.0406
+	1.6209	2.73517	O95372	O95372;Q5QPN5;Q5QPN9;Q5QPQ1;Q5QPQ2;Q5QPQ3	LYPA2_HUMAN	LYPLA2	Acyl-protein thioesterase 2	18.4426	18.3253	18.6621	14.9281	15.0248	17.2716
+	2.935	0.568213	O95373	O95373	IPO7_HUMAN	IPO7	Importin-7	23.2017	23.193	23.2143	22.5758	22.5575	22.7711
+	3.62367	1.30708	O95379-2	O95379;D6RCM8;O95379-2;O95379-3;O95379-4;E5RIJ3	TFIP8_HUMAN	TNFAIP8	Isoform of O95379, Isoform 2 of Tumor necrosis factor alpha-induced protein 8	23.0255	22.9227	23.1495	21.5629	21.7911	21.8224
+	2.94104	0.610372	O95391	O95391	SLU7_HUMAN	SLU7	Pre-mRNA-splicing factor SLU7	20.567	20.6976	20.534	19.8991	20.0853	19.9831
+	2.38832	0.593135	O95400	O95400	CD2B2_HUMAN	CD2BP2	CD2 antigen cytoplasmic tail-binding protein 2	20.9065	20.8921	20.8731	20.2171	20.4958	20.1794
+	2.29684	0.559525	O95409	O95409	ZIC2_HUMAN	ZIC2	Zinc finger protein ZIC 2	19.2513	19.5042	19.4795	18.7534	18.8433	18.9596
+	5.55203	1.07799	O95425-4	O95425;O95425-2;O95425-3;O95425-4;A0A6I8PIX7	SVIL_HUMAN	SVIL	Isoform of O95425, Isoform SV4 of Supervillin	22.308	22.3059	22.3599	21.2053	21.2539	21.2806
+	2.49043	0.988747	O95433	O95433;H0YJU2;G3V438	AHSA1_HUMAN	AHSA1	Activator of 90 kDa heat shock protein ATPase homolog 1	19.7514	20.0939	20.0852	18.7715	19.0755	19.1173
+	2.55627	0.723566	O95466-2	O95466;O95466-2;O95466-3	FMNL1_HUMAN	FMNL1	Isoform of O95466, Isoform 2 of Formin-like protein 1	20.2648	20.5101	20.4953	19.558	19.8195	19.7219
+	3.51407	0.518111	O95470	O95470;A0A8V8TN35	SGPL1_HUMAN	SGPL1	Sphingosine-1-phosphate lyase 1	20.3801	20.3366	20.4147	19.9206	19.7893	19.8673
+	2.91404	0.619942	O95573	O95573;A0A7P0T8L6;A0A7P0TB52;A0A7P0TBB1;A0A7P0TA76	ACSL3_HUMAN	ACSL3	Fatty acid CoA ligase Acsl3	19.9275	20.0367	20.1275	19.3398	19.3872	19.5048
+	4.16444	-0.724276	O95602	O95602;B9ZVN9	RPA1_HUMAN	POLR1A	DNA-directed RNA polymerase I subunit RPA1	20.1568	20.2067	20.2243	20.8555	20.9844	20.9207
+	4.52032	0.47219	O95625	O95625;C9J2L2;A0A8I5QKX4;A0A8I5KRB5;A0A8I5KU41	ZBT11_HUMAN	ZBTB11	Zinc finger and BTB domain-containing protein 11	21.4608	21.3935	21.3955	20.952	20.9422	20.939
+	2.8915	0.586788	O95672	O95672;O95672-2	ECEL1_HUMAN	ECEL1	Endothelin-converting enzyme-like 1	21.5756	21.7004	21.7551	20.9935	21.1585	21.1186
+	1.78747	0.610821	O95684;O95684-2	O95684;O95684-2;A0A087WV25	CEP43_HUMAN	CEP43	Centrosomal protein 43	19.6776	19.6146	19.4606	19.1862	19.0221	18.7121
+	2.31608	0.394926	O95696-2	O95696;O95696-2	BRD1_HUMAN	BRD1	Isoform of O95696, Isoform 2 of Bromodomain-containing protein 1	19.6027	19.5067	19.3815	19.0555	19.0985	19.1521
+	2.92579	-0.268936	O95714	O95714;A0A0J9YXQ8	HERC2_HUMAN	HERC2	E3 ubiquitin-protein ligase HERC2	21.4971	21.5335	21.5884	21.7908	21.7884	21.8467
+	1.87347	1.24536	O95747	O95747;C9JIG9	OXSR1_HUMAN	OXSR1	Serine/threonine-protein kinase OSR1	19.0071	18.8086	19.6376	17.7027	18.212	17.8025
+	3.42317	0.963924	O95757	O95757;D6RJ96;E9PDE8	HS74L_HUMAN	HSPA4L	Heat shock 70 kDa protein 4L	19.86	19.8731	19.9734	18.895	18.8278	19.092
+	1.56859	3.43773	O95777	O95777;C9JNV3;C9JIZ0;F2Z2Y6	LSM8_HUMAN	LSM8	U6 snRNA-associated Sm-like protein LSm8	20.3775	18.0215	17.3272	14.6275	15.9367	14.8489
+	3.29499	0.801652	O95782;O95782-2	O95782;O95782-2	AP2A1_HUMAN	AP2A1	AP-2 complex subunit alpha-1	20.9348	20.9772	21.1192	20.1632	20.1456	20.3175
+	1.31731	0.532376	O95785-3	O95785;O95785-2;O95785-3;O95785-4;A0A2R8YFV2;M0QXA7;A0A669KBG4;A0A669KBH9;A0A669KAV7;B9EGQ5	WIZ_HUMAN	WIZ	Isoform of O95785, Isoform 3 of Protein Wiz	19.6258	19.3707	19.6838	18.7552	19.3189	19.009
+	3.40528	0.780699	O95816	O95816;O95816-2	BAG2_HUMAN	BAG2	BAG family molecular chaperone regulator 2	23.3273	23.1571	23.3765	22.474	22.4879	22.5568
+	3.40422	1.14471	O95817	O95817	BAG3_HUMAN	BAG3	BAG family molecular chaperone regulator 3	19.1086	19.0474	18.9825	17.8753	17.7464	18.0827
+	3.33912	0.722251	O95819-6	O95819;E7EX83;A0A0D9SEY1;O95819-2;O95819-3;O95819-4;O95819-5;O95819-6;H7C360;H7C0P6;G5E948;E7EN19;E7ENQ1	M4K4_HUMAN	MAP4K4	Isoform of O95819, Isoform 6 of Mitogen-activated protein kinase kinase kinase kinase 4	20.1579	20.1214	19.9431	19.3549	19.321	19.3798
+	2.43398	0.945061	O95831	O95831;A0A6Q8PFM5;A0A6Q8PFE1;A0A6Q8PFA7;A0A7I2RLJ8;A0A6Q8PFS4;A0A6Q8PFW2;A0A6Q8PFQ8;A0A6Q8PG15;A0A6Q8PHJ9;A0A6Q8PHC0;A0A7I2PK44;O95831-3;O95831-4	AIFM1_HUMAN	AIFM1	Apoptosis-inducing factor 1, mitochondrial	19.6353	19.8534	19.8492	18.6288	18.7786	19.0953
+	0.859318	-1.05982	O95900	O95900;O95900-2	TRUB2_HUMAN	TRUB2	Pseudouridylate synthase TRUB2, mitochondrial	15.7027	15.9768	14.3276	16.3588	16.866	15.9619
+	2.6905	0.464151	O95905;O95905-3	O95905;C9J316;O95905-2;O95905-3;F2Z2R1	ECD_HUMAN	ECD	Protein ecdysoneless homolog	20.8399	20.7268	20.7223	20.2639	20.402	20.2306
+	2.51862	0.845694	O95980	O95980	RECK_HUMAN	RECK	Reversion-inducing cysteine-rich protein with Kazal motifs	19.6284	19.7516	19.8069	18.6491	18.9493	19.0514
+	2.5308	0.458038	O95985	O95985;O95985-2;O95985-3;H0Y6W0	TOP3B_HUMAN	TOP3B	DNA topoisomerase 3-beta-1	21.9112	21.8551	21.748	21.3677	21.2965	21.4761
+	3.109	0.432573	O96019	O96019;H7C5S0	ACL6A_HUMAN	ACTL6A	Actin-like protein 6A	21.5913	21.4533	21.532	21.0434	21.1213	21.114
+	2.84258	0.335892	O96028	O96028;D6R9V2;A0A7P0P278;O96028-3;O96028-5;O96028-6;O96028-7;A0A7I2YQS5	NSD2_HUMAN	NSD2	Histone-lysine N-methyltransferase NSD2	20.5521	20.5856	20.5839	20.1848	20.3198	20.2095
+	2.63289	1.69395	P00338;P00338-3	P00338;P00338-3;P00338-4	LDHA_HUMAN	LDHA	L-lactate dehydrogenase A chain	23.4363	23.4989	23.7553	22.0226	22.1608	21.4252
+	2.28218	0.601058	P00367	P00367;P49448;A0A804HJZ0;A0A804HJD7;A0A804HKE0;P00367-3	DHE3_HUMAN	GLUD1	Glutamate dehydrogenase 1, mitochondrial	20.499	20.4419	20.7383	19.8655	20.07	19.9404
+	2.24643	1.0909	P00374;P00374-2	P00374;P00374-2	DYR_HUMAN	DHFR	Dihydrofolate reductase	19.0975	18.4702	18.8018	17.7705	17.8041	17.5223
+	1.78791	1.04818	P00387;P00387-2;P00387-3	P00387;P00387-2;P00387-3;A0A8I5QKX1;A0A8I5QKT9;A0A8I5QKL2;B1AHF3;A0A8J8Z3C6;A0A8J8YWN6;A0A8I5KNV1;A0A8I5KPU0;A0A8I5KR71;A0A8I5KUA5;A0A8I5KTF9;A0A8I5KW26;A0A8I5KVD2;A0A8I5KYU1;A0A8I5KXI5	NB5R3_HUMAN	CYB5R3	NADH-cytochrome b5 reductase 3	19.392	19.6883	19.4621	18.6945	18.7313	17.972
+	3.07498	0.71337	P00450	P00450;H7C5N5;H7C5R1;E9PFZ2	CERU_HUMAN	CP	Ceruloplasmin	22.088	22.2068	22.0153	21.2838	21.4114	21.4748
+	1.90351	1.75678	P00492	P00492	HPRT_HUMAN	HPRT1	Hypoxanthine-guanine phosphoribosyltransferase	18.3912	17.9858	17.9898	15.5994	16.6973	16.7999
+	2.20528	1.27807	P00505	P00505;P00505-2	AATM_HUMAN	GOT2	Aspartate aminotransferase, mitochondrial	19.7578	19.7107	20.0508	18.8317	18.7237	18.1298
+	3.70055	1.54508	P00533	P00533;Q504U8;C9JYS6	EGFR_HUMAN	EGFR	Epidermal growth factor receptor	20.0222	19.9288	20.1137	18.4586	18.6679	18.3029
+	3.3854	1.15523	P00558	P00558;P00558-2	PGK1_HUMAN	PGK1	Phosphoglycerate kinase 1	21.6572	21.4108	21.6168	20.2582	20.4677	20.4933
+	3.53306	1.38837	P00966	P00966;Q5T6L5;Q5T6L6	ASSY_HUMAN	ASS1	Argininosuccinate synthase	22.1817	22.0397	22.3289	20.6606	20.9454	20.7793
+	1.11023	2.67787	P01040	P01040;C9J0E4	CYTA_HUMAN	CSTA	Cystatin-A	19.719	20.0557	19.8384	17.7204	18.8326	15.0264
+	2.87639	0.406706	P01106	P01106;A0A0B4J1R1	MYC_HUMAN	MYC	Myc proto-oncogene protein	19.6817	19.6826	19.8207	19.3211	19.2849	19.3588
+	1.60776	3.20942	P01112	P01112;P01112-2;A0A804HJ06;A0A8C8MQR2	RASH_HUMAN	HRAS	GTPase HRas	19.0654	19.4604	19.7599	15.0063	15.6926	17.9586
+	3.43701	1.20387	P01116-2	P01116;P01112;P01116-2;P01112-2;A0A804HJ06;A0A8I5KQ21;A0A8I5KUB5	RASK_HUMAN	KRAS	Isoform of P01116, Isoform 2B of GTPase KRas	21.4241	21.5494	21.2057	20.111	20.226	20.2307
+	1.13729	3.9405	P01876	P01877;P01876;A0A286YEY1;A0A286YEY5;A0A0G2JMB2	IGHA1_HUMAN	IGHA1	Immunoglobulin heavy constant alpha 1	19.8243	20.6149	19.1949	14.4261	19.0903	14.2962
+	2.10151	1.71691	P01889	P01889;Q2L6G2;S6AU73;Q5SPM2;A0A1W2PP29;A0A1W2PPF8;Q5SS57;A0A1W2PNR7;A0A1W2PR61;A0A140T9Y5;A0A140T9D4;A0A140T953;A0A140T8Y4;A0A140T997;A0A0G2JPD3;A0A140T8W8;D9J307;A0A140TA21;A0A140TA02;A0A140TA11;A0A140TA13;A0A140TA14;D5H3J5;A0A8Q3SIV3	HLAB_HUMAN	HLA-B	HLA class I histocompatibility antigen, B alpha chain	17.4285	18.2808	17.7007	15.6199	16.4302	16.2092
+	1.35868	1.73087	P01893	P01893;O78179;A2BF26;A0A1W2PP77;A0A1W2PNZ7;A0A1W2PR11;A0A1W2PS56;A0A1W2PRX1;A0A1W2PRZ0;A0A140T9U0;A0A140T9W2;A0A140T9M0;A0A140T9J9;A0A0G2JPT2;A0A140T9B3;A0A140T930;A0A140T937;A0A140T962;A0A140T912;Q5RIP0;Q53YP1;A0A0G2JIF0;Q5QT33;A0A0G2JH50	HLAH_HUMAN	HLA-H	Putative HLA class I histocompatibility antigen, alpha chain H	16.8574	17.5988	16.6218	14.393	15.3071	16.1853
+	1.07309	2.85468	P02461	P02461	CO3A1_HUMAN	COL3A1	Collagen alpha-1(III) chain	18.7998	18.8167	18.4441	15.6539	18.0714	13.7714
+	4.73209	0.975608	P02545	P02545;P02545-2;P02545-3;P02545-4;P02545-5;P02545-6;Q5TCI8;A0A6Q8PFJ0;A0A6Q8PHQ9;A0A804HL68	LMNA_HUMAN	LMNA	Prelamin-A/C	22.0735	22.0475	22.1396	21.1721	21.0766	21.0851
+	1.43048	0.894507	P02765	P02765;C9JV77	FETUA_HUMAN	AHSG	Alpha-2-HS-glycoprotein	16.9169	17.4436	17.2584	15.8981	16.2861	16.7512
+	2.47604	0.803652	P02768	P02768;H0YA55;H7C013;A0A0C4DGB6	ALBU_HUMAN	ALB	Albumin	30.1328	30.2205	30.1477	29.4507	29.1155	29.5238
+	3.54992	1.18206	P02774;P02774-3	P02774;D6RF35;D6RF20;D6RBJ7;P02774-3	VTDB_HUMAN	GC	Vitamin D-binding protein	21.7863	21.8273	22.0159	20.6373	20.6137	20.8324
+	3.56944	1.28863	P02786	P02786;G3V0E5;A0A8V8TM41;A0A8V8TM46;A0A8V8TN37;A0A8V8TLM6;A0A8V8TLN0	TFR1_HUMAN	TFRC	Transferrin receptor protein 1	21.6684	21.6924	21.8689	20.3145	20.4384	20.6109
+	2.46337	0.818856	P04049	P04049;A0A8I5QJG5;A0A8I5QKZ6;A0A8I5QKU8;A0A0S2Z4L5;P04049-2;H7C155;A0A8I5KQ33;A0A8I5KS16;A0A8I5KSI1;A0A8I5KSB0;A0A8I5KQV4;A0A8I5KSV6;A0A8I5KT32;A0A8I5KTK4;A0A8I5KTA5;A0A8I5KW44;A0A8I5KYC4;A0A8I5KYP5	RAF1_HUMAN	RAF1	RAF proto-oncogene serine/threonine-protein kinase	19.8565	19.6519	19.7199	18.7206	18.9234	19.1278
+	2.47979	1.35743	P04075	P04075;J3KPS3;H3BR68;P04075-2	ALDOA_HUMAN	ALDOA	Fructose-bisphosphate aldolase A	22.2148	21.9368	22.13	20.619	21.1272	20.4632
+	1.71813	1.22912	P04083	P04083;Q5T3N1	ANXA1_HUMAN	ANXA1	Annexin A1	20.5317	20.2912	20.4821	19.8357	18.9144	18.8675
+	1.21116	0.39758	P04114	P04114	APOB_HUMAN	APOB	Apolipoprotein B-100	17.6122	17.8399	18.1351	17.5062	17.4813	17.407
+	3.11634	0.644697	P04150	P04150;D6RDA9;P04150-2;P04150-3;P04150-5;P04150-6;P04150-7;P04150-8;P04150-9;P04150-10;A0A494C0P1;Q3MSN4	GCR_HUMAN	NR3C1	Glucocorticoid receptor	18.806	18.6745	18.7541	18.0449	18.0386	18.217
+	2.55077	1.62738	P04156	P04156;X6RKS3;A2A2V1	PRIO_HUMAN	PRNP	Major prion protein	19.4711	19.7225	19.6886	17.5297	18.2644	18.2059
+	0.994768	-1.12987	P04183	P04183;K7ES52;K7ERV3;K7ERJ1	KITH_HUMAN	TK1	Thymidine kinase, cytosolic	17.1622	15.6985	16.8339	17.9833	17.1045	17.9964
+	3.16358	1.34714	P04406	P04406;P04406-2;E7EUT5	G3P_HUMAN	GAPDH	Glyceraldehyde-3-phosphate dehydrogenase	25.2248	24.9925	24.9192	23.7579	23.8481	23.489
+	1.25938	0.702527	P04439;P04439-2	P17693;P13747;P01889;P01893;P04439;Q2L6G2;O78179;S6AU73;A2BF26;Q31611;A0A1W2PP77;A0A1W2PP29;Q5SUL5;Q5SS57;A0A1W2PNZ7;Q5SRN5;Q5SRN7;D0EV57;A0A1W2PSE7;A0A1W2PQD0;A0A1W2PR11;A0A1W2PS56;A0A1W2PRX1;A0A1W2PRZ0;A0A1W2PS24;A0A140T9U0;A0A140T9S9;A0A140T9W2;A0A140T9W3;A0A140T9V0;A0A0G2JNX1;A0A140T9X6;A0A140T9W7;A0A140T9M0;A0A0G2JPQ3;A0A140T9C2;A0A140T9D9;A0A140T9H3;A0A140T9G0;A0A140T9J9;A0A140T9B3;A0A140T9…	HLAA_HUMAN	HLA-A	HLA class I histocompatibility antigen, A alpha chain	20.3556	20.6453	19.777	19.6054	19.4408	19.6241
+	2.91609	0.92142	P04632	Q96L46;P04632;A0A075B7C0;K7EIV0;U3KQE2;U3KPR7;K7EKD8;K7ELJ7;A0A0C4DGQ5	CPNS1_HUMAN	CAPNS1	Calpain small subunit 1	18.6577	18.5898	18.7664	17.7909	17.8991	17.5596
+	2.12972	1.00868	P04792	P04792;A0A6Q8PFK8;A0A6Q8PFE7;A0A6Q8PGK1;A0A6Q8PGY2;A0A6Q8PHA6;A0A6Q8PH65;A0A6Q8PF43;A0A6Q8PHJ6	HSPB1_HUMAN	HSPB1	Heat shock protein beta-1	24.8143	24.864	24.936	24.2249	23.8209	23.5426
+	0.75522	2.03938	P04818	P04818;P04818-2	TYSY_HUMAN	TYMS	Thymidylate synthase	19.5239	19.4764	19.7974	18.5225	19.0524	15.1046
+	3.5574	0.831928	P04843	P04843;F8WF32	RPN1_HUMAN	RPN1	Dolichyl-diphosphooligosaccharide--protein glycosyltransferase subunit 1	20.9899	20.9966	20.8113	20.1643	20.0502	20.0874
+	3.1612	1.12679	P04899-4	P04899;P04899-2;P04899-3;P04899-4;P04899-5;P04899-6	GNAI2_HUMAN	GNAI2	Isoform of P04899, Isoform sGi2 of Guanine nucleotide-binding protein G(i) subunit alpha-2	24.1007	24.1653	24.1237	22.7727	23.0802	23.1565
+	2.38785	0.876995	P04908;Q7L7L0;Q93077	P0C0S8;Q6FI13;P04908;P20671;Q9BTM1;Q7L7L0;Q99878;Q93077;Q96KK5;Q16777;H0YFX9;A0A0U1RR32;A0A0U1RRH7	H2A1B_HUMAN;H2A1C_HUMAN;H2A3_HUMAN	H2AC25;H2AC6;H2AC8	Histone H2A type 1-B/E	28.6036	28.5193	28.8598	27.7793	27.972	27.6005
+	3.98188	1.09985	P05023;P05023-4	P05023;P05023-2;P05023-3;P05023-4	AT1A1_HUMAN	ATP1A1	Sodium/potassium-transporting ATPase subunit alpha-1	20.7213	20.7557	20.8969	19.7841	19.6607	19.6295
+	2.49973	1.13766	P05026;P05026-2	P05026;B7Z9S8;P05026-2;A0A8I5KNT2;A0A8I5KX89	AT1B1_HUMAN	ATP1B1	Sodium/potassium-transporting ATPase subunit beta-1	19.0066	19.0046	19.4704	17.8426	18.1245	18.1016
+	1.84676	0.351461	P05067-5;P05067-6	H7C2L2;P05067-5;P05067-6	A4_HUMAN	APP	Isoform of P05067, Isoform L-APP696 of Amyloid-beta precursor protein	22.3352	22.439	22.5741	22.0586	22.0403	22.195
+	2.32208	3.07536	P05090	P05090;C9JX71;C9JF17	APOD_HUMAN	APOD	Apolipoprotein D	19.5536	19.8704	18.8051	16.2802	17.1231	15.5997
+	2.80359	0.699893	P05114	P05114;H7BXJ5;A0A494C035;F2Z2Y5;F2Z2W6	HMGN1_HUMAN	HMGN1	Non-histone chromosomal protein HMG-14	21.614	21.5254	21.3094	20.7921	20.7557	20.8013
+	4.2805	0.734958	P05141	P12236;P05141;P12235;Q9H0C2;V9GYG0	ADT2_HUMAN	SLC25A5	ADP/ATP translocase 2	22.2147	22.229	22.2004	21.4352	21.446	21.5581
+	2.92568	1.64399	P05165	P05165;A0A1B0GUX9;A0A1B0GU58;A0A1B0GWI4;A0A1B0GWA1;P05165-2;P05165-3	PCCA_HUMAN	PCCA	Propionyl-CoA carboxylase alpha chain, mitochondrial	19.835	19.9105	19.925	17.8583	18.507	18.3732
+	0.780886	2.30928	P05166;P05166-2	P05166;E7EX59;E7ETT1;E7ETT4;E7EUY3;F8WBI9;P05166-2;E9PDR0;E9PEC3	PCCB_HUMAN	PCCB	Propionyl-CoA carboxylase beta chain, mitochondrial	19.2255	19.1479	19.1811	16.4324	19.4273	14.7669
+	3.0288	1.15387	P05186	P05186;P05186-2;P05186-3	PPBT_HUMAN	ALPL	Alkaline phosphatase, tissue-nonspecific isozyme	22.067	22.1179	21.851	20.7399	20.7706	21.0638
+	4.90033	1.3737	P05187	P05187;P09923	PPB1_HUMAN	ALPP	Alkaline phosphatase, placental type	22.521	22.6471	22.5437	21.195	21.2588	21.1369
+	1.81322	0.425056	P05198	P05198;H0YJS4;G3V4T5	IF2A_HUMAN	EIF2S1	Eukaryotic translation initiation factor 2 subunit 1	24.4699	24.1862	24.1636	23.888	23.8791	23.7775
+	2.81945	1.30723	P05204	P05204	HMGN2_HUMAN	HMGN2	Non-histone chromosomal protein HMG-17	22.1379	22.1317	21.8085	20.9422	20.7213	20.4928
+	2.97992	1.0439	P05362	P05362;E7ESS4	ICAM1_HUMAN	ICAM1	Intercellular adhesion molecule 1	19.2232	19.3225	19.584	18.2289	18.4333	18.3359
+	1.40826	0.307411	P05455	P05455	LA_HUMAN	SSB	Lupus La protein	21.4484	21.4571	21.6046	21.2041	21.3444	21.0393
+	3.1711	-0.406431	P05549	Q92754;P05549;Q92754-2;C1K3N0;C9JXZ2;H7C5E5;H7C4N4;A0A6E1XE14;P05549-2;P05549-5;P05549-6	AP2A_HUMAN	TFAP2A	Transcription factor AP-2-alpha	22.9413	22.9454	23.0276	23.4346	23.3752	23.3238
+	1.0717	1.75967	P05556	P05556;E7EUI6;C9JPK5;H7C4K3;P05556-2;P05556-3;P05556-4;P05556-5;A0A7I2V2F9;A0A7I2V348;A0A7I2V5T3;A0A7I2V5Z8	ITB1_HUMAN	ITGB1	Integrin beta-1	18.5077	18.6196	18.9413	17.639	17.7411	15.4095
+	4.9108	0.811663	P05783	P05783;F8VZY9	K1C18_HUMAN	KRT18	Keratin, type I cytoskeletal 18	28.091	28.0997	28.0354	27.2203	27.2999	27.271
+	5.59472	0.96177	P05787;P05787-2	P05787;P05787-2	K2C8_HUMAN	KRT8	Keratin, type II cytoskeletal 8	26.6527	26.6611	26.5947	25.6788	25.6942	25.6501
+	2.15006	1.19743	P05976-2	P05976;P08590;P05976-2	MYL1_HUMAN	MYL1	Isoform of P05976, Isoform MLC3 of Myosin light chain 1/3, skeletal muscle isoform	23.3834	23.2134	23.2227	22.0188	21.7104	22.498
+	4.19794	1.24939	P06241	P12931;P07947;P06241;P12931-2;P12931-3;P06241-3;P06241-2;J3QRU1	FYN_HUMAN	FYN	Tyrosine-protein kinase Fyn	24.9105	24.9732	24.9066	23.5492	23.7145	23.7784
+	1.74684	1.27108	P06241-2	P06241-2	FYN_HUMAN	FYN	Isoform of P06241, Isoform 2 of Tyrosine-protein kinase Fyn	22.298	22.2445	21.5017	20.4731	21.143	20.6149
+	4.32066	1.04865	P06396-2	P06396;P06396-2;P06396-3;P06396-4;A0A0A0MS51;A0A0A0MT01;A0A8V8TND7	GELS_HUMAN	GSN	Isoform of P06396, Isoform 2 of Gelsolin	22.0322	21.9401	22.0376	20.9535	20.8753	21.0352
+	3.65631	1.71348	P06454;P06454-2	P06454;P06454-2;B8ZZQ6	PTMA_HUMAN	PTMA	Prothymosin alpha	22.2447	21.918	22.3264	20.3478	20.492	20.5088
+	3.97501	1.0442	P06493	P06493;P06493-2;A0A024QZP7	CDK1_HUMAN	CDK1	Cyclin-dependent kinase 1	20.5307	20.7284	20.7184	19.5805	19.6069	19.6576
+	3.12318	0.711006	P06576	P06576;H0YH81;F8W079	ATPB_HUMAN	ATP5F1B	ATP synthase subunit beta, mitochondrial	21.172	21.1402	21.3694	20.4631	20.5317	20.5538
+	3.38002	2.18359	P06703	P06703;R4GN98	S10A6_HUMAN	S100A6	Protein S100-A6	22.0322	22.0103	22.0879	19.5907	20.2527	19.7361
+	2.80841	0.783742	P06730;P06730-2	P06730;D6RBW1;H0Y8J7;P06730-2;P06730-3	IF4E_HUMAN	EIF4E	Eukaryotic translation initiation factor 4E	20.3534	20.2175	20.022	19.472	19.3523	19.4173
+	3.48318	1.73114	P06733	P06733;A0A2R8Y6G6;P06733-2	ENOA_HUMAN	ENO1	Alpha-enolase	23.3278	23.0206	23.3706	21.4665	21.704	21.355
+	3.34277	1.49892	P06744	P06744;A0A2R8Y6C7;P06744-2;A0A2U3TZU2;A0A0J9YX90;A0A0J9YXP8;A0A0J9YYH3;K7ENA0;K7EQ48;K7EPY4	G6PI_HUMAN	GPI	Glucose-6-phosphate isomerase	20.986	21.0189	21.0441	19.7478	19.5427	19.2618
+	2.92336	0.732752	P06748	P06748;P06748-2;P06748-3;A0A7I2YQC0;E5RI98;A0A7I2V2X9;A0A7I2V3G5;A0A7I2V433;A0A7I2V3U2;A0A7I2V4G8;A0A7I2V579;A0A7I2V5J8;A0A7I2V5S2	NPM_HUMAN	NPM1	Nucleophosmin	30.6415	30.6012	30.5592	29.9356	29.9707	29.6973
+	3.59722	1.43158	P06753-2	P06753;J3KN67;P06753-2;P06753-3;P06753-4;P06753-5;P06753-6;P06753-7;A0A494C034;A0A2R2Y2Q3	TPM3_HUMAN	TPM3	Isoform of P06753, Isoform 2 of Tropomyosin alpha-3 chain	26.1668	26.1157	26.1267	24.5283	24.9223	24.6639
+	1.793	0.447918	P06899;Q16778	P57053;Q99879;Q16778;Q5QNW6;O60814;P62807;P23527;Q99877;Q99880;P06899;P33778;P58876;Q8N257;Q93079;Q96A08;U3KQK0;Q5QNW6-2	H2B1J_HUMAN;H2B2E_HUMAN	H2BC11;H2BC21	Histone H2B type 1-J	32.0354	31.923	31.6582	31.4338	31.4222	31.4169
+	1.88218	2.09513	P07108	P07108;P07108-2;P07108-3;P07108-4;P07108-5;B8ZWD1	ACBP_HUMAN	DBI	Acyl-CoA-binding protein	17.5891	17.353	17.8166	16.2656	14.6305	15.5773
+	3.73748	1.37487	P07195	P07195;A8MW50;C9J7H8;A0A5F9ZHM4;F5H793;A0A3B3IS95	LDHB_HUMAN	LDHB	L-lactate dehydrogenase B chain	23.0504	23.2008	23.2741	21.8335	21.918	21.6491
+	3.82542	1.47638	P07237	P07237;A0A7P0T9D6;A0A7P0T9K9;A0A7P0T9U6;A0A7P0T8C0;A0A7P0T8J3;A0A7P0T8X1;H0Y3Z3;A0A7P0TA35;A0A7P0TA71;A0A7P0TA97;A0A7P0TB26;H7BZ94;B3KTQ9;I3L514;I3L4M2;I3L3P5;I3L0S0	PDIA1_HUMAN	P4HB	Protein disulfide-isomerase	21.6282	21.4841	21.4748	19.9706	20.2377	19.9496
+	1.14103	1.50526	P07333	P07333;P08922;P31152;Q16659;Q5H8Y1;K7EN18;K7ELV1	CSF1R_HUMAN	CSF1R	Macrophage colony-stimulating factor 1 receptor	18.1135	17.9977	17.6803	15.2129	17.0773	16.9855
+	3.62094	1.18419	P07355	P07355;A6NMY6;H0YNP5;H0YMU9;H0YMW4;H0YN28;H0YN42;H0YM50;H0YMD0;H0YL33;P07355-2	ANXA2_HUMAN	ANXA2	Annexin A2	22.6134	22.5254	22.5676	21.5296	21.4093	21.2149
+	2.30676	0.525812	P07437	P07437;Q13885;Q9BVA1;Q13509;G3V5W4;G3V4U2;G3V3R4;G3V3W7;G3V2N6;G3V2R8;G3V3J6	TBB5_HUMAN	TUBB	Tubulin beta chain	25.5234	25.5907	25.3385	24.9658	24.8589	25.0505
+	3.56617	1.93675	P07737	P07737;K7EJ44	PROF1_HUMAN	PFN1	Profilin-1	22.5949	22.4039	22.5861	20.6484	20.8149	20.3114
+	2.83011	0.877932	P07741	P07741;H3BSW3;H3BQF1;H3BQB1;H3BQZ9;P07741-2	APT_HUMAN	APRT	Adenine phosphoribosyltransferase	19.6482	19.4439	19.8158	18.8199	18.7543	18.6999
+	3.65717	0.944843	P07814	P07814	SYEP_HUMAN	EPRS1	Bifunctional glutamate/proline--tRNA ligase	23.855	23.814	23.6382	22.882	22.8234	22.7672
+	2.46414	3.28199	P07858	P07858;A0A7P0NGZ6;E9PCB3;E9PS78;E9PSG5;E9PQM1;E9PR21;E9PNL5;E9PLY3;E9PKQ7;E9PHZ5;A0A7I2YQK9;A0A7I2V2J1;A0A7I2V302;A0A7I2V440;A0A7I2V4S6;A0A7I2V4Z9;A0A7I2V668	CATB_HUMAN	CTSB	Cathepsin B	18.1786	18.2791	17.6997	13.7974	15.0736	15.4405
+	3.54167	1.28753	P07900-2	P07900;P07900-2	HS90A_HUMAN	HSP90AA1	Isoform of P07900, Isoform 2 of Heat shock protein HSP 90-alpha	23.0852	23.1016	22.9586	21.7305	21.9447	21.6076
+	1.84527	-2.07294	P07910	P07910;G3V555;G3V575;G3V576;G3V2Q1	HNRPC_HUMAN	HNRNPC	Heterogeneous nuclear ribonucleoproteins C1/C2	18.129	18.185	16.6801	19.8291	19.8142	19.5695
+	3.73179	-1.17549	P07910-2	P07910;B4DY08;G3V5V7;G3V555;G3V4W0;G3V575;G3V576;G3V4C1;G3V2Q1;G3V2D6;P07910-2;P07910-3;P07910-4	HNRPC_HUMAN	HNRNPC	Isoform of P07910, Isoform C1 of Heterogeneous nuclear ribonucleoproteins C1/C2	24.6312	24.5487	24.4835	25.8006	25.814	25.5752
+	3.62187	1.04752	P07947	P07947;J3QRU1	YES_HUMAN	YES1	Tyrosine-protein kinase Yes	22.4046	22.4444	22.2898	21.263	21.2608	21.4724
+	4.20284	1.31039	P07948	P07948;P07948-2	LYN_HUMAN	LYN	Tyrosine-protein kinase Lyn	23.8759	23.9643	23.9909	22.5182	22.748	22.6336
+	2.93771	1.17528	P07948-2	P07948-2	LYN_HUMAN	LYN	Isoform of P07948, Isoform 2 of Tyrosine-protein kinase Lyn	22.1008	22.1218	22.4515	20.9263	21.01	21.2119
+	1.75053	3.28692	P07951	P07951;A7XZE4	TPM2_HUMAN	TPM2	Tropomyosin beta chain	21.5574	21.6092	22.0089	19.0389	19.4854	16.7906
+	3.30671	1.82291	P07951-2	A7XZE4;P07951-2;P07951-3	TPM2_HUMAN	TPM2	Isoform of P07951, Isoform 2 of Tropomyosin beta chain	22.7836	22.5344	22.7703	20.767	21.1815	20.6711
+	2.16297	1.03109	P07954;P07954-2	P07954;A0A804HI24;P07954-2;A0A804HKE6	FUMH_HUMAN	FH	Fumarate hydratase, mitochondrial	20.2453	20.0905	20.4369	19.1007	19.0073	19.5714
+	2.07341	1.40973	P08133;P08133-2	P08133;A0A0S2Z377;P08133-2	ANXA6_HUMAN	ANXA6	Annexin A6	19.426	19.3278	18.5387	17.6083	17.8456	17.6094
+	2.52799	2.24366	P08174;P08174-2;P08174-3;P08174-4;P08174-5	P08174;P08174-2;P08174-3;P08174-4;P08174-5;P08174-6;P08174-7;H3BLV0;B1AP13;A0A8Q3WLV2;A0A8Q3WKT6;A0A8Q3SI51;A0A8Q3SI94	DAF_HUMAN	CD55	Complement decay-accelerating factor	22.6529	22.9567	23.0839	20.0432	20.777	21.1424
+	5.30833	1.34085	P08195;P08195-3;P08195-4	P08195;J3KPF3;H0YH36;H0YFS2;A0A7P0T9F7;A0A7P0T8F1;A0A7P0T8U7;A0A7P0T853;A0A7P0TAT7;A0A7P0TBF8;A0A7P0TAN7;A0A7P0TAS6;A0A7P0Z4P5;A0A7P0Z4A0;P08195-2;P08195-3;P08195-4;F5GZS6;F5H867	4F2_HUMAN	SLC3A2	4F2 cell-surface antigen heavy chain	22.8044	22.8261	22.9169	21.5169	21.5397	21.4682
+	3.4394	0.528277	P08237;P08237-3	P08237;A0A2R8Y891;F8VZI0;P08237-2;P08237-3	PFKAM_HUMAN	PFKM	ATP-dependent 6-phosphofructokinase, muscle type	21.282	21.3282	21.3762	20.8476	20.724	20.8299
+	5.4298	1.28792	P08238	Q58FF8;P07900;P08238;Q14568;P07900-2	HS90B_HUMAN	HSP90AB1	Heat shock protein HSP 90-beta	25.6911	25.7286	25.7362	24.3925	24.4972	24.4024
+	3.30204	0.911374	P08240	P08240;P08240-2	SRPRA_HUMAN	SRPRA	Signal recognition particle receptor subunit alpha	21.7759	21.6617	21.4983	20.8059	20.707	20.6889
+	1.89425	0.688077	P08243;P08243-2	P08243;P08243-2;P08243-3	ASNS_HUMAN	ASNS	Asparagine synthetase [glutamine-hydrolyzing]	19.8765	19.8377	19.4215	18.8975	19.1272	19.0469
+	4.89158	1.13062	P08473	P08473;C9IYX7;A0A6Q8PFY6;A0A7I2U302	NEP_HUMAN	MME	Neprilysin	20.2245	20.1261	20.1298	18.972	19.065	19.0516
+	1.62589	0.592733	P08493;P08493-2	P08493;P08493-2	MGP_HUMAN	MGP	Matrix Gla protein	19.2744	19.5443	19.1883	18.5388	18.9776	18.7124
+	1.69442	0.368846	P08559;P08559-2;P08559-3;P08559-4	P08559;P29803;P08559-2;P08559-3;P08559-4;Q5JPU2	ODPA_HUMAN	PDHA1	Pyruvate dehydrogenase E1 component subunit alpha, somatic form, mitochondrial	19.9106	19.7595	19.9747	19.3917	19.4954	19.6511
+	1.05008	0.541021	P08574	P08574	CY1_HUMAN	CYC1	Cytochrome c1, heme protein, mitochondrial	19.1433	19.4468	19.7838	18.6179	18.9887	19.1442
+	4.18202	1.27944	P08582	P08582;P08582-2;A0A8Q3WLY9	TRFM_HUMAN	MELTF	Melanotransferrin	22.1798	22.2009	22.1102	20.7711	20.873	21.0085
+	2.20624	0.577901	P08621	P08621;P08621-4	RU17_HUMAN	SNRNP70	U1 small nuclear ribonucleoprotein 70 kDa	24.9395	25.0248	24.6631	24.3001	24.3153	24.2783
+	2.37146	0.648536	P08651-2	P08651;P08651-2;P08651-3;P08651-4;P08651-5;P08651-6;A0A286YEX4	NFIC_HUMAN	NFIC	Isoform of P08651, Isoform 1 of Nuclear factor 1 C-type	21.9965	22.0829	21.7806	21.424	21.289	21.2013
+	4.2226	0.987706	P08670	P08670;B0YJC4	VIME_HUMAN	VIM	Vimentin	23.0932	23.0951	23.1904	22.179	22.1891	22.0474
+	4.11542	0.936279	P08729	P08729	K2C7_HUMAN	KRT7	Keratin, type II cytoskeletal 7	22.4405	22.4694	22.6181	21.5496	21.5796	21.59
+	4.38279	1.3526	P08754	P08754	GNAI3_HUMAN	GNAI3	Guanine nucleotide-binding protein G(i) subunit alpha-3	28.2996	28.4058	28.1998	26.8767	26.9885	26.9822
+	2.56589	1.43245	P08758	P08758;D6RBL5;E9PHT9	ANXA5_HUMAN	ANXA5	Annexin A5	20.6963	20.6104	20.175	18.8314	19.3286	19.0243
+	1.85687	0.362167	P09012	P09012;M0R2B8;M0R221;M0R268;M0QXK2;M0QZG7	SNRPA_HUMAN	SNRPA	U1 small nuclear ribonucleoprotein A	21.558	21.3831	21.3047	21.0733	21.1164	20.9697
+	3.00664	0.722288	P09234	P09234;A0A0A0MRR7	RU1C_HUMAN	SNRPC	U1 small nuclear ribonucleoprotein C	21.9228	21.7765	21.7925	21.213	20.9766	21.1353
+	2.95839	1.41491	P09382	P09382;F8WEI7	LEG1_HUMAN	LGALS1	Galectin-1	21.7479	21.9682	22.2106	20.4016	20.7526	20.5278
+	3.55945	1.23276	P09429	B2RPK0;P09429;Q5T7C4	HMGB1_HUMAN	HMGB1	High mobility group protein B1	24.1076	24.0009	23.761	22.7118	22.7272	22.7322
+	2.30499	1.25634	P09471-2	P09471;H3BTM2;P09471-2	GNAO_HUMAN	GNAO1	Isoform of P09471, Isoform Alpha-2 of Guanine nucleotide-binding protein G(o) subunit alpha	19.4478	19.8009	19.7786	18.1224	18.7803	18.3557
+	3.76693	1.51741	P09493-3	P09493-8;P09493-9;P09493-2;P09493-3;P09493-7;Q6ZN40;H7BYY1	TPM1_HUMAN	TPM1	Isoform of P09493, Isoform 3 of Tropomyosin alpha-1 chain	24.4683	24.3779	24.569	22.7597	23.0497	23.0536
+	3.63092	1.53529	P09493-5	P09493-5;H0YN06;H0YKJ4;H0YK48;B7Z596;A0A494BZZ2;H7BYY1;F5H7S3	TPM1_HUMAN	TPM1	Isoform of P09493, Isoform 5 of Tropomyosin alpha-1 chain	23.0513	22.9228	23.0997	21.3205	21.4497	21.6977
+	4.76403	1.49365	P09496-2	P09496;P09496-2;P09496-3;P09496-4;F8WF69	CLCA_HUMAN	CLTA	Isoform of P09496, Isoform Non-brain of Clathrin light chain A	22.1162	22.0474	22.2148	20.6068	20.7072	20.5834
+	2.61473	0.988964	P09497-2	P09497;P09497-2	CLCB_HUMAN	CLTB	Isoform of P09497, Isoform Non-brain of Clathrin light chain B	19.379	19.3918	19.6456	18.4543	18.2976	18.6976
+	2.98625	1.02421	P09543;P09543-2	P09543;P09543-2	CN37_HUMAN	CNP	2',3'-cyclic-nucleotide 3'-phosphodiesterase	19.6144	19.8549	19.8951	18.9207	18.6445	18.7265
+	1.34156	-1.67876	P09629	P09630;P31267;P09067;Q00444;P09629;P31274;P20719;P28356;P17481;P31268;P17482;P31273;P17509;P09630-2;I3L3R1;I3L383;V9GYH0	HXB7_HUMAN	HOXB7	Homeobox protein Hox-B7	16.5382	15.9158	16.5003	17.9334	17.0784	18.9788
+	1.9007	0.44314	P09651;P09651-2	A0A2R8Y4L2;P09651;H0YH80;F8VZ49;F8W6I7;F8VTQ5;A0A7I2YQX9;P09651-2;P09651-3;A0A7I2V2L6;A0A7I2V334;A0A7I2V3R8;A0A7I2V3W0;A0A7I2V5H0;A0A7I2V5T1	ROA1_HUMAN	HNRNPA1	Heterogeneous nuclear ribonucleoprotein A1	22.5844	22.5462	22.3126	22.1202	22.0676	21.9259
+	2.02062	2.34337	P09669	P09669	COX6C_HUMAN	COX6C	Cytochrome c oxidase subunit 6C	17.7214	18.8377	18.313	15.1824	16.2558	16.4038
+	2.81039	0.234399	P09874	P09874;A0A7I2V3E1;A0A7I2V5E9;A0A7I2V625	PARP1_HUMAN	PARP1	Poly [ADP-ribose] polymerase 1	25.9182	25.8898	25.8314	25.6549	25.6684	25.613
+	3.70767	1.01686	P09884	P09884;A6NMQ1;A0A7I2V2V3	DPOLA_HUMAN	POLA1	DNA polymerase alpha catalytic subunit	19.8108	19.8718	19.6968	18.6875	18.886	18.7553
+	1.53264	0.43572	P09917;P09917-3	P09917;P09917-2;P09917-3;P09917-4;P09917-5	LOX5_HUMAN	ALOX5	Polyunsaturated fatty acid 5-lipoxygenase	21.8001	21.6194	21.9932	21.3713	21.4963	21.2381
+	3.80954	1.31656	P09923	P09923	PPBI_HUMAN	ALPI	Intestinal-type alkaline phosphatase	21.6239	21.7464	21.7918	20.2631	20.4082	20.5411
+	3.52664	1.19582	P09972	P09972;A8MVZ9;J3KSV6;K7EKH5;J3QKP5	ALDOC_HUMAN	ALDOC	Fructose-bisphosphate aldolase C	20.6645	20.4285	20.7679	19.4117	19.454	19.4077
+	1.89764	-0.258117	P0C2W1	P0C2W1	FBSP1_HUMAN	FBXO45	F-box/SPRY domain-containing protein 1	17.7059	17.6415	17.7583	17.864	17.9858	18.0301
+	1.25684	0.74525	P0C7P0	P0C7P0	CISD3_HUMAN	CISD3	CDGSH iron-sulfur domain-containing protein 3, mitochondrial	19.5837	20.1999	20.1432	19.4347	18.8365	19.4198
+	2.04764	-1.10509	P0CAP2	P0CAP2;P0CAP2-2;P0CAP1-11;H8Y6P7	GRL1A_HUMAN	POLR2M	DNA-directed RNA polymerase II subunit GRINL1A	18.0265	17.4379	18.0272	18.7734	18.8526	19.1808
+	3.73872	0.745106	P0CG12	P0CG12	DERPC_HUMAN	DERPC	Decreased expression in renal and prostate cancer protein	20.2578	20.3387	20.3736	19.5043	19.6568	19.5738
+	2.27986	1.66124	P0CG38	P0CG38	POTEI_HUMAN	POTEI	POTE ankyrin domain family member I	20.3938	20.0345	20.5511	18.4739	18.3439	19.1779
+	1.3009	0.39699	P0CG40	P0CG40	SP9_HUMAN	SP9	Transcription factor Sp9	24.4091	24.061	24.3525	23.782	23.7847	24.0651
+	1.49318	0.355822	P0CJ79	Q9NV72;P0CJ79;Q9NV72-2	ZN888_HUMAN	ZNF888	Zinc finger protein 888	18.4463	18.3424	18.3865	18.2258	18.0231	17.8588
+	1.82601	0.455685	P0CW18	P0CW18	PRS56_HUMAN	PRSS56	Serine protease 56	22.1684	22.4901	22.4724	21.9414	21.8468	21.9757
+	1.25117	0.777759	P0DI83	P0DI83;A0A1B0GTQ2;A0A1B0GWB1;A0A1C7CYW6	NARR_HUMAN	RAB34	Isoform of Q9BZG1, Ras-related protein Rab-34, isoform NARR	19.8359	20.4563	19.8469	19.4469	19.5044	18.8545
+	3.23716	0.733021	P0DMV8;P0DMV9	P0DMV8;P0DMV9;P34931;V9GZ37;Q53FA3;P0DMV8-2;A0A0G2JIW1	HS71A_HUMAN;HS71B_HUMAN	HSPA1A;HSPA1B	Heat shock 70 kDa protein 1A	23.6486	23.5413	23.7256	22.8035	22.9543	22.9587
+	4.70305	1.07725	P0DP23;P0DP24;P0DP25	P0DP24;P0DP25;P0DP23;G3V361;A0A590UJI2;E7EMB3;Q96HY3	CALM1_HUMAN;CALM2_HUMAN;CALM3_HUMAN	CALM1;CALM2;CALM3	Calmodulin-1	29.0284	28.9656	29.0985	27.963	27.9056	27.9923
+	1.66301	-0.589193	P0DPB6	P0DPB6;A0A0R4J2F3	RPAC2_HUMAN	POLR1D	DNA-directed RNA polymerases I and III subunit RPAC2	19.7336	19.6277	19.2625	20.1671	20.2386	19.9858
+	2.22051	0.46846	P10075	P10075	GLI4_HUMAN	GLI4	Zinc finger protein GLI4	18.6196	18.3828	18.595	17.9856	18.0615	18.1448
+	3.08739	1.39312	P10301	P10301	RRAS_HUMAN	RRAS	Ras-related protein R-Ras	20.031	20.3036	20.1839	18.5327	18.8239	18.9825
+	2.59787	0.750753	P10321	P01889;P10321;A2AEA2;O78179;O19617;A0A1W2PP77;A0A1W2PP29;Q5SS57;A0A1W2PNZ7;A0A1W2PR11;A0A1W2PRX1;A0A1W2PRZ0;A0A140T9U0;A0A140T9T1;A0A140T9W2;A0A140T9U8;A0A140T9L3;A0A140T9M0;A0A140T9M5;A0A140T9D4;A0A140T9E1;A0A140T9H5;A0A140T9J9;A0A140T9B3;A0A140T930;A0A140T937;A0A140T942;A0A140T951;A0A140T962;A0A140T912;A0A140T921;Q53YP1;A0A140TA21;A0A140TA05;A0A8Q3SIV3;Q5QT33	HLAC_HUMAN	HLA-C	HLA class I histocompatibility antigen, C alpha chain	18.7598	18.9735	18.8717	18.0982	17.9676	18.287
+	1.43811	0.348937	P10398	P10398	ARAF_HUMAN	ARAF	Serine/threonine-protein kinase A-Raf	18.5995	18.7821	18.5947	18.1703	18.2693	18.4899
+	1.93639	0.459595	P10412	P10412	H14_HUMAN	H1-4	Histone H1.4	26.705	26.8488	26.8122	26.2059	26.5155	26.2659
+	1.62561	1.64453	P10599	P10599;P10599-2	THIO_HUMAN	TXN	Thioredoxin	21.8777	21.7908	21.6589	20.8166	20.3153	19.2619
+	3.86049	0.727041	P10644	P10644;K7EM13;K7EPB2;P10644-2	KAP0_HUMAN	PRKAR1A	cAMP-dependent protein kinase type I-alpha regulatory subunit	19.4362	19.4181	19.4645	18.7219	18.6236	18.7922
+	3.55668	1.10086	P10809	P10809;A0A7I2YQK6;A0A7I2V2X6;A0A7I2V599	CH60_HUMAN	HSPD1	60 kDa heat shock protein, mitochondrial	23.1188	22.9803	23.1133	21.8749	22.1287	21.9061
+	3.43405	0.673159	P11021	P11021;A0A7P0TAI0	BIP_HUMAN	HSPA5	Endoplasmic reticulum chaperone BiP	23.77	23.6828	23.7019	22.9747	23.1518	23.0087
+	3.48859	0.826255	P11142	P11142;P54652;E9PPY6;E9PQK7;E9PQQ4;E9PN89;E9PLF4;P11142-2;E9PN25;E9PK54;E9PKE3	HSP7C_HUMAN	HSPA8	Heat shock cognate 71 kDa protein	25.318	25.223	25.348	24.4152	24.592	24.403
+	2.16589	1.56503	P11166	P11166;A0A6Q8PFI8	GTR1_HUMAN	SLC2A1	Solute carrier family 2, facilitated glucose transporter member 1	19.6211	19.8799	19.8194	18.5021	17.619	18.5042
+	3.06391	1.04904	P11177;P11177-2;P11177-3	P11177;C9J634;F8WF02;P11177-2;P11177-3	ODPB_HUMAN	PDHB	Pyruvate dehydrogenase E1 component subunit beta, mitochondrial	18.0744	18.2287	18.4742	17.2034	17.1898	17.2369
+	3.40042	1.59606	P11216	P06737;P11217;P11216;P11217-2;P06737-2;E9PK47	PYGB_HUMAN	PYGB	Glycogen phosphorylase, brain form	19.4267	19.7824	19.7804	18.1723	18.1317	17.8973
+	3.52895	1.20113	P11233	P11233;H7C3P7	RALA_HUMAN	RALA	Ras-related protein Ral-A	21.311	21.5441	21.6186	20.2149	20.2942	20.3613
+	3.27065	1.26752	P11234-3	P11234;C9J6B1;C9JQB3;P11234-2;P11234-3	RALB_HUMAN	RALB	Isoform of P11234, Isoform 3 of Ras-related protein Ral-B	20.04	19.9852	20.2508	18.7375	18.7206	19.0153
+	1.85677	0.435668	P11274	P11274;P11274-2	BCR_HUMAN	BCR	Breakpoint cluster region protein	18.8696	18.871	18.6675	18.4465	18.2084	18.4462
+	0.88468	2.45448	P11279	P11279;P11279-2	LAMP1_HUMAN	LAMP1	Lysosome-associated membrane glycoprotein 1	18.9655	19.5071	19.1877	17.9762	18.1197	14.2009
+	3.59007	0.85483	P11310;P11310-2	P11310;P11310-2;H0YDT5;A0A7P0T8G6;Q5T4U5;A0A7P0TB51;A0A7P0TB55;F6YB23	ACADM_HUMAN	ACADM	Medium-chain specific acyl-CoA dehydrogenase, mitochondrial	20.4934	20.6631	20.629	19.766	19.8058	19.6493
+	5.44726	0.766309	P11388;P11388-2;P11388-3;P11388-4	P11388;P11388-2;P11388-3;P11388-4	TOP2A_HUMAN	TOP2A	DNA topoisomerase 2-alpha	24.9608	24.9963	24.9634	24.2382	24.2076	24.1758
+	3.52964	1.18796	P11413;P11413-2	P11413;P11413-2;P11413-3;E7EUI8;A0A8Q3WL95;A0A8Q3SIN6;A0A8Q3SJB9;A0A8Q3SIS5	G6PD_HUMAN	G6PD	Glucose-6-phosphate 1-dehydrogenase	20.6269	20.7372	20.8883	19.4369	19.5898	19.6618
+	2.25951	1.85474	P11441	P11441;Q5HY81	UBL4A_HUMAN	UBL4A	Ubiquitin-like protein 4A	17.6564	16.5766	17.2847	15.5332	15.1026	15.3175
+	5.531	2.01383	P11498	P11498	PYC_HUMAN	PC	Pyruvate carboxylase, mitochondrial	23.8702	23.9372	23.7753	21.8484	21.8025	21.8903
+	1.49126	0.69404	P11586	P11586;V9GYY3;V9GZ78;A0A494C1T2;A0A8V8TMA4;A0A8V8TMA9;A0A8V8TKR5;A0A8V8TKS0;A0A8V8TKT4;A0A8V8TL50;F5H2F4	C1TC_HUMAN	MTHFD1	C-1-tetrahydrofolate synthase, cytoplasmic	21.0812	21.0179	21.2104	20.1291	20.2828	20.8154
+	1.69517	1.07425	P11717	P11717	MPRI_HUMAN	IGF2R	Cation-independent mannose-6-phosphate receptor	19.1898	18.6765	18.906	17.3887	17.931	18.2298
+	4.07104	1.03683	P12004	P12004	PCNA_HUMAN	PCNA	Proliferating cell nuclear antigen	21.2009	21.2271	21.3697	20.1605	20.286	20.2407
+	3.41628	0.994539	P12081	P12081;P49590;A0A2R8Y6I1;A0A2R8Y3N3;A0A2R8Y5P7;A0A2R8Y5E8;A0A2R8Y4X6;A0A6Q8PFF2;A0A6Q8PFG9;A0A6Q8PFN6;A0A6Q8PHA5;E7ETE2;A0A6Q8PF07;A0A6Q8PF47;D6RJE6;P12081-2;P12081-3;P12081-4;P49590-2	HARS1_HUMAN	HARS1	Histidine--tRNA ligase, cytoplasmic	20.2487	20.1644	20.0621	19.035	19.2847	19.1718
+	2.90749	0.637723	P12236	P12236;P12235;V9GYG0	ADT3_HUMAN	SLC25A6	ADP/ATP translocase 3	20.0652	19.8989	19.9297	19.2306	19.3149	19.4352
+	3.80549	1.01685	P12268	P12268;E7ETK5;H0Y4R1;A0A7I2YQK5;A0A7I2V2T3	IMDH2_HUMAN	IMPDH2	Inosine-5'-monophosphate dehydrogenase 2	24.3695	24.3959	24.3155	23.2833	23.4818	23.2652
+	2.85711	0.699765	P12270	P12270	TPR_HUMAN	TPR	Nucleoprotein TPR	19.5985	19.5625	19.8198	18.8976	19.0262	18.9577
+	3.20303	1.56738	P12277	P12277;A0A0S2Z471;G3V461;G3V4N7	KCRB_HUMAN	CKB	Creatine kinase B-type	21.777	21.5134	21.8643	19.9879	20.3894	20.0752
+	1.70231	1.05647	P12814;P12814-2;P12814-3	P12814;A0A804HIN7;A0A804HII9;P12814-2;P12814-3;P12814-4;A0A804HLD0;A0A804HLF4;A0A804HJU8;A0A804HK61;A0A804HL31;A0A804HKE2;H9KV75;A0A7I2V4Y4	ACTN1_HUMAN	ACTN1	Alpha-actinin-1	19.1627	19.1126	19.5337	17.7531	18.2827	18.6036
+	1.6248	0.626338	P13489	P13489;E9PMA9;E9PLZ3;E9PMJ3;E9PIK5;E9PIM9	RINI_HUMAN	RNH1	Ribonuclease inhibitor	18.7713	18.7821	19.1056	18.4928	18.0152	18.2719
+	3.9745	1.05998	P13498	P13498;H3BR52;H3BPZ7;H3BPX1;H3BNP7;A0A8Q3WLM1;A0A8Q3WL20;A0A8Q3WL27;A0A8Q3SIJ9;A0A8Q3SJ80	CY24A_HUMAN	CYBA	Cytochrome b-245 light chain	20.1456	20.274	20.2908	19.1659	19.2716	19.0929
+	3.54585	-0.615326	P13639	P13639	EF2_HUMAN	EEF2	Elongation factor 2	28.9482	28.8873	29.0252	29.5063	29.5828	29.6175
+	3.21814	1.19287	P13667	P13667;C9JMN9;A0A499FI48	PDIA4_HUMAN	PDIA4	Protein disulfide-isomerase A4	19.9065	19.7027	19.9432	18.6586	18.8236	18.4915
+	3.31059	0.817191	P13674-2;P13674-3	P13674;P13674-2;P13674-3	P4HA1_HUMAN	P4HA1	Isoform of P13674, Isoform 2 of Prolyl 4-hydroxylase subunit alpha-1	19.981	20.0644	19.9971	19.3138	19.2189	19.0582
+	2.42411	2.24407	P13693	Q56UQ5;P13693;J3KPG2;P13693-2;Q5W0H4;E9PJF7;A0A0B4J2C3	TCTP_HUMAN	TPT1	Translationally-controlled tumor protein	20.5893	20.1968	20.7178	18.5811	18.6056	17.585
+	2.99837	0.89554	P13797-2	P13797;P13797-2;P13797-3	PLST_HUMAN	PLS3	Isoform of P13797, Isoform 2 of Plastin-3	20.8802	20.8523	21.0318	19.8697	20.1739	20.034
+	1.34005	1.84608	P13804;P13804-2	P13804;A0A0S2Z3M4;H0YLU7;H0YL83;H0YK49;P13804-2;A0A8I5KUR2;A0A8I5KT03;A0A8I5KVL5;A0A8I5KYH4;A0A8I5KYP7	ETFA_HUMAN	ETFA	Electron transfer flavoprotein subunit alpha, mitochondrial	18.5499	18.6529	19.167	15.7958	17.1331	17.9025
+	2.25307	0.922242	P13807;P13807-2	P13807;P13807-2	GYS1_HUMAN	GYS1	Glycogen [starch] synthase, muscle	19.065	19.138	19.2244	17.9314	18.4974	18.2318
+	3.25017	0.943106	P13861	P13861;P13861-2;H7C1L0	KAP2_HUMAN	PRKAR2A	cAMP-dependent protein kinase type II-alpha regulatory subunit	20.2222	20.2049	20.4475	19.2918	19.454	19.2996
+	2.17385	0.588098	P13984	P13984	T2FB_HUMAN	GTF2F2	General transcription factor IIF subunit 2	22.2023	22.1407	21.8343	21.469	21.4826	21.4614
+	2.24836	1.22257	P13987;P13987-2	P13987;A0A2U3TZL5;P13987-2;E9PNW4;H0YET2	CD59_HUMAN	CD59	CD59 glycoprotein	24.1287	24.5077	24.423	22.9559	22.9168	23.5189
+	2.09937	1.78568	P13995	P13995;P13995-2;B9A062;A0A7I2V2U6;A0A7I2V482	MTDC_HUMAN	MTHFD2	Bifunctional methylenetetrahydrofolate dehydrogenase/cyclohydrolase, mitochondrial	18.7605	18.5194	18.9811	17.6165	16.8084	16.479
+	1.51533	1.59716	P14174	P14174	MIF_HUMAN	MIF	Macrophage migration inhibitory factor	21.9855	21.9379	20.6076	19.7379	20.2781	19.7236
+	2.10015	1.96195	P14209;P14209-3	P14209;P14209-3;A0A096LP69	CD99_HUMAN	CD99	CD99 antigen	17.3567	17.4514	17.8065	15.4107	16.292	15.026
+	3.07665	1.53761	P14314;P14314-2	P14314;K7ELL7;P14314-2	GLU2B_HUMAN	PRKCSH	Glucosidase 2 subunit beta	19.7887	19.639	19.7159	17.9962	18.5064	18.0282
+	2.26359	0.91721	P14324;P14324-2	P14324;P14324-2;A0A087X1D8;A0A087WTP2;A0A087WVN4	FPPS_HUMAN	FDPS	Farnesyl pyrophosphate synthase	19.4129	19.513	19.6593	18.8361	18.3221	18.6753
+	4.08464	1.07438	P14384	P14384;F8VVI6;F8W111	CBPM_HUMAN	CPM	Carboxypeptidase M	20.9717	20.958	21.0031	19.9276	19.7815	20.0006
+	3.29973	0.987784	P14618	P14618;H3BTN5;H3BQ34;B4DNK4;A0A8V8TNX9;A0A8V8TMM5;P14618-2;P14618-3;A0A804F6T5;A0A804F729	KPYM_HUMAN	PKM	Pyruvate kinase PKM	23.6394	23.5957	23.7514	22.7892	22.7232	22.5108
+	3.85182	1.44352	P14625	P14625;H0YIV0;A0A7P0T917;A0A7P0T823;A0A7P0TAT8;A0A7P0TAY2;A0A7P0TBC2;A0A7P0TAE1;A0A087WT78	ENPL_HUMAN	HSP90B1	Endoplasmin	22.5267	22.3695	22.557	20.9156	21.1976	21.0094
+	0.925228	2.46978	P14635	P14635;E9PC90;D6RHI0;P14635-2	CCNB1_HUMAN	CCNB1	G2/mitotic-specific cyclin-B1	18.6478	18.394	17.5043	17.0613	13.3226	16.7529
+	4.35126	1.15406	P14649	P14649;F8W1I5;A0A8Q3SIC5;A0A8Q3SIF0;A0A8Q3SI90	MYL6B_HUMAN	MYL6B	Myosin light chain 6B	22.3863	22.3031	22.4915	21.2159	21.2108	21.2921
+	0.804796	1.66244	P14735	P14735;A0A3B3ISG5;A0A7I2YQS6;A0A7I2YQV5;A0A7I2V2P6;A0A7I2V2S1;A0A7I2V373;A0A7I2V3E3;A0A7I2V4A4;A0A7I2V4Q3;A0A7I2V610;A0A7I2V612;A0A7I2V634	IDE_HUMAN	IDE	Insulin-degrading enzyme	18.9883	19.2802	19.5852	19.073	17.9307	15.8627
+	2.01465	-0.375542	P14866	P14866	HNRPL_HUMAN	HNRNPL	Heterogeneous nuclear ribonucleoprotein L	21.8302	21.7456	21.8052	22.169	22.3023	22.0363
+	3.88605	0.725803	P14868	P14868;P14868-2	SYDC_HUMAN	DARS1	Aspartate--tRNA ligase, cytoplasmic	23.521	23.3641	23.3825	22.7033	22.6843	22.7026
+	1.47331	0.797766	P14923	P14923	PLAK_HUMAN	JUP	Junction plakoglobin	24.3045	24.4684	24.3348	24.0629	23.3052	23.3463
+	4.10425	1.25297	P15170-2;P15170-3	P15170;P15170-3;P15170-2	ERF3A_HUMAN	GSPT1	Isoform of P15170, Isoform 2 of Eukaryotic peptide chain release factor GTP-binding subunit ERF3A	20.22	20.2026	20.2802	19.0324	19.0725	18.8389
+	3.57496	1.00953	P15311	P15311;P35241;P26038;A0A2R8Y7M3;A0A2R8Y5S7;E9PNP4;P35241-3;P35241-5	EZRI_HUMAN	EZR	Ezrin	23.9047	23.7244	23.6678	22.6705	22.7944	22.8033
+	1.97233	1.05344	P15531;P15531-2	P15531;J3KPD9;E7ERL0;P22392-2;Q32Q12;P15531-2	NDKA_HUMAN	NME1	Nucleoside diphosphate kinase A	22.9187	22.835	22.6549	22.0311	21.9006	21.3166
+	3.07991	1.27068	P15559-3	P15559;H3BRK3;B4DLR8;P15559-2;P15559-3	NQO1_HUMAN	NQO1	Isoform of P15559, Isoform 3 of NAD(P)H dehydrogenase [quinone] 1	20.3307	20.5205	20.1866	19.1371	19.2129	18.8757
+	0.849524	1.76116	P15735	P15735;J3KNN3;P15735-2	PHKG2_HUMAN	PHKG2	Phosphorylase b kinase gamma catalytic chain, liver/testis isoform	19.4821	19.011	19.0864	17.9664	15.5825	18.7472
+	4.10838	1.19356	P16070;P16070-10;P16070-11;P16070-12;P16070-13;P16070-14;P16070-16;P16070-17;P16070-18;P16070-3;P16070-4;P16070-5;P16070-6;P16070-7;P16070-8	P16070;P16070-10;P16070-11;P16070-12;P16070-13;P16070-14;P16070-15;P16070-16;P16070-17;P16070-18;H0YDX6;H0YCV9;H0YDW7;H0YD13;H0YD17;H0Y5E4;H0Y2P0;P16070-3;P16070-4;P16070-5;P16070-6;P16070-7;P16070-8;P16070-9	CD44_HUMAN	CD44	CD44 antigen	23.5424	23.7494	23.6329	22.3695	22.4732	22.5013
+	3.63745	3.00979	P16083	P16083;Q5TD07	NQO2_HUMAN	NQO2	Ribosyldihydronicotinamide dehydrogenase [quinone]	18.3146	18.5591	18.8077	15.5105	15.2392	15.9024
+	0.906864	1.78516	P16152	P16152	CBR1_HUMAN	CBR1	Carbonyl reductase [NADPH] 1	18.6661	18.4531	18.992	17.9523	17.6888	15.1146
+	1.7009	0.356473	P16401	P16401	H15_HUMAN	H1-5	Histone H1.5	29.496	29.3978	29.2464	29.0086	29.1365	28.9257
+	1.72485	0.330411	P16403	P16402;P10412;P16403	H12_HUMAN	H1-2	Histone H1.2	30.6752	30.8528	30.7084	30.4982	30.4651	30.2819
+	1.7986	0.846584	P16435	P16435;A0A8V8NE24;H0Y4R2;E7EMD0	NCPR_HUMAN	POR	NADPH--cytochrome P450 reductase	19.0027	19.5412	19.531	18.3794	18.419	18.7368
+	3.29942	0.853576	P16615	P16615;P16615-2;P16615-3;P16615-4;P16615-5	AT2A2_HUMAN	ATP2A2	Sarcoplasmic/endoplasmic reticulum calcium ATPase 2	22.0591	22.0225	22.2381	21.2207	21.1885	21.3499
+	2.30571	0.892335	P16930	P16930;P16930-2	FAAA_HUMAN	FAH	Fumarylacetoacetase	18.3725	18.7244	18.5717	17.4637	17.8847	17.6432
+	3.18068	1.78318	P16949	P16949;P16949-2;A2A2D0	STMN1_HUMAN	STMN1	Stathmin	20.1991	20.0302	20.123	18.4972	18.5295	17.9761
+	1.21517	0.433005	P17010;P17010-2;P17010-3	P08048;P17010;E9PEP7;P08048-2;P08048-3;P17010-2;P17010-3	ZFX_HUMAN	ZFX	Zinc finger X-chromosomal protein	19.7561	19.6589	19.7004	19.0372	19.1888	19.5904
+	1.28192	0.580409	P17028	P17028;P17028-2	ZNF24_HUMAN	ZNF24	Zinc finger protein 24	16.9692	17.521	17.6498	16.8606	16.7274	16.8108
+	1.69423	2.78426	P17036	P17036;Q86U76	ZNF3_HUMAN	ZNF3	Zinc finger protein 3	18.3987	18.7123	18.381	14.7275	15.2548	17.1569
+	2.64207	1.02835	P17066	P48741;P17066	HSP76_HUMAN	HSPA6	Heat shock 70 kDa protein 6	25.6473	25.4529	25.6312	24.4423	24.8164	24.3876
+	1.4386	0.317911	P17096	P17096;P17096-2	HMGA1_HUMAN	HMGA1	High mobility group protein HMG-I/HMG-Y	23.5702	23.7953	23.825	23.5212	23.4158	23.2998
+	1.47928	0.471706	P17097;P17097-2	P17097;E9PJZ3;E9PJX9;F5H290;P17097-2	ZNF7_HUMAN	ZNF7	Zinc finger protein 7	19.3818	18.9308	19.3055	18.832	18.675	18.696
+	2.44715	0.953843	P17174	P17174	AATC_HUMAN	GOT1	Aspartate aminotransferase, cytoplasmic	19.3091	19.7411	19.6525	18.6688	18.4516	18.7207
+	3.05917	0.883013	P17480	P17480;P17480-2;E9PMM2;E9PKP7	UBF1_HUMAN	UBTF	Nucleolar transcription factor 1	26.3399	26.3581	26.0887	25.4305	25.4225	25.2847
+	1.46056	0.51588	P17480-2	P17480-2;E9PKP7	UBF1_HUMAN	UBTF	Isoform of P17480, Isoform UBF2 of Nucleolar transcription factor 1	22.5562	22.5698	22.294	21.7406	21.9202	22.2115
+	3.14958	4.55324	P17655	P17655	CAN2_HUMAN	CAPN2	Calpain-2 catalytic subunit	19.6855	19.9815	19.6315	15.1142	16.0738	14.4509
+	1.24993	0.854678	P17676;P17676-2	P17676;P17676-2;P17676-3	CEBPB_HUMAN	CEBPB	CCAAT/enhancer-binding protein beta	18.9472	19.1175	19.1393	17.726	18.8034	18.1106
+	1.29631	1.23419	P17813;P17813-2	P17813;P17813-2;F5GX88	EGLN_HUMAN	ENG	Endoglin	17.0098	16.8066	17.6992	15.7293	15.4537	16.63
+	4.68785	0.373458	P17844	P17844;J3KTA4;J3KTQ4;X6RLV5;P17844-2;J3QR02;J3QRQ7;A0A7I2V2S0;A0A7I2V507	DDX5_HUMAN	DDX5	Probable ATP-dependent RNA helicase DDX5	26.0881	26.0925	26.0621	25.7304	25.6852	25.7067
+	2.18815	0.363391	P17858	P08237;P17858;A0A2R8Y891;P17858-2;P08237-3	PFKAL_HUMAN	PFKL	ATP-dependent 6-phosphofructokinase, liver type	22.9582	22.9749	22.8575	22.6134	22.4489	22.638
+	0.803812	1.76655	P17931	P17931;G3V3R6	LEG3_HUMAN	LGALS3	Galectin-3	19.6315	19.5591	18.9819	19.2663	17.7772	15.8294
+	2.92489	0.94816	P17980	P17980;R4GNH3;E9PLG2;E9PMD8;E9PN50;E9PKD5	PRS6A_HUMAN	PSMC3	26S proteasome regulatory subunit 6A	20.901	20.9805	21.0491	19.8346	20.048	20.2037
+	2.6714	0.773959	P17987	P17987;E7ERF2;E7EQR6	TCPA_HUMAN	TCP1	T-complex protein 1 subunit alpha	21.3772	21.3361	21.5253	20.4526	20.7186	20.7456
+	2.43707	0.205945	P18074	P18074;A8MX75;E7EVE9;A0A804HK53	ERCC2_HUMAN	ERCC2	General transcription and DNA repair factor IIH helicase subunit XPD	19.2804	19.2992	19.3434	19.0763	19.071	19.1579
+	1.89955	0.750762	P18085	P18085;C9JAK5;U3KQF2	ARF4_HUMAN	ARF4	ADP-ribosylation factor 4	20.4346	20.6243	20.7141	19.7272	19.6491	20.1444
+	3.19701	0.833585	P18206;P18206-2	P18206;P18206-2	VINC_HUMAN	VCL	Vinculin	19.8901	19.9014	19.8233	18.8958	19.0367	19.1816
+	2.95531	0.538396	P18583-5	P18583;P18583-2;P18583-3;P18583-4;P18583-5;P18583-6;P18583-7;P18583-8;P18583-9;P18583-10	SON_HUMAN	SON	Isoform of P18583, Isoform D of Protein SON	21.4286	21.4218	21.5173	20.9077	21.0197	20.8251
+	3.70344	1.07718	P18615	P18615;P18615-3;P18615-4	NELFE_HUMAN	NELFE	Negative elongation factor E	21.1836	21.1713	21.2433	20.0276	20.2799	20.0592
+	2.57778	1.40328	P18669	P18669	PGAM1_HUMAN	PGAM1	Phosphoglycerate mutase 1	20.6606	20.0959	20.5696	19.133	19.1778	18.8054
+	2.53587	0.706295	P18754;P18754-2	P18754;C9J3R0;P18754-2;C9JW69;C9JRH2;C9JQZ4;C9JMJ4	RCC1_HUMAN	RCC1	Regulator of chromosome condensation	20.2779	20.1073	20.1018	19.333	19.3985	19.6367
+	3.10243	-1.85702	P18827	P18827	SDC1_HUMAN	SDC1	Syndecan-1	20.1685	20.8335	20.6403	22.4435	22.3124	22.4575
+	1.29493	0.9637	P18858-3	P18858;P18858-2;P18858-3;B4E135;M0R0Q7;A0A8V8TQC4;A0A8V8TQC8;A0A8V8TQQ3;A0A8V8TQQ7;A0A8V8TPB0;A0A8V8TPH4;A0A8V8TPH8;A0A8V8TNZ9;A0A8V8TP03;F5GZ28	DNLI1_HUMAN	LIG1	Isoform of P18858, Isoform 3 of DNA ligase 1	19.351	19.1888	19.3612	18.2177	17.8087	18.9835
+	2.13117	0.265846	P18887	P18887;F5H8D7	XRCC1_HUMAN	XRCC1	DNA repair protein XRCC1	21.2844	21.1641	21.2012	20.9005	21.0281	20.9236
+	5.79709	1.79203	P19256;P19256-2;P19256-3	P19256;H0YDI1;B1AMW1;P19256-2;P19256-3	LFA3_HUMAN	CD58	Lymphocyte function-associated antigen 3	21.1547	21.2053	21.0998	19.3754	19.3993	19.309
+	3.1343	-0.853751	P19387	P19387	RPB3_HUMAN	POLR2C	DNA-directed RNA polymerase II subunit RPB3	20.3598	20.3504	20.5477	21.1473	21.3063	21.3655
+	2.6962	-0.619796	P19388	P19388;A0A0A0MQR7;A0A087WWX0	RPAB1_HUMAN	POLR2E	DNA-directed RNA polymerases I, II, and III subunit RPABC1	21.3769	21.1053	21.2519	21.925	21.8696	21.7989
+	1.55013	0.306764	P19447	P19447;A0A2R8Y6W8;A0A2R8Y762;A0A2R8Y5L2;A0A2R8YES7;H7C309	ERCC3_HUMAN	ERCC3	General transcription and DNA repair factor IIH helicase subunit XPB	20.9958	21.171	21.1016	20.8198	20.6372	20.8911
+	2.71138	0.56333	P19525	P19525;A0A7P0TBA9;A0A7P0TAL9;P19525-2;A0A7P0Z4M0	E2AK2_HUMAN	EIF2AK2	Interferon-induced, double-stranded RNA-activated protein kinase	20.7833	20.7111	20.6378	20.1236	20.0475	20.2711
+	2.65963	1.67338	P19623	P19623;K7EL89	SPEE_HUMAN	SRM	Spermidine synthase	19.1268	18.8729	19.1709	16.9431	17.6099	17.5974
+	2.62987	1.19195	P20020;P20020-1;P20020-4;P20020-6	P23634;P20020;P20020-1;P20020-2;P20020-4;P20020-5;P20020-6;P23634-2;P23634-3;P23634-4;P23634-5;P23634-6;P23634-7;P23634-8	AT2B1_HUMAN	ATP2B1	Plasma membrane calcium-transporting ATPase 1	18.8726	18.9148	19.2626	18.0343	17.613	17.8269
+	2.58311	0.537286	P20042	P20042	IF2B_HUMAN	EIF2S2	Eukaryotic translation initiation factor 2 subunit 2	24.0996	24.068	23.906	23.4736	23.5862	23.402
+	1.19523	1.7311	P20073;P20073-2	P20073;P20073-2	ANXA7_HUMAN	ANXA7	Annexin A7	18.7087	19.0275	18.6431	18.4025	16.4133	16.3702
+	0.903292	1.75933	P20226;P20226-2	P20226;P20226-2;H0Y6D8	TBP_HUMAN	TBP	TATA-box-binding protein	19.1295	19.4812	19.2789	15.7313	18.4228	18.4574
+	1.31092	-1.39387	P20290-2	D6RDG3;P20290-2;A0A7I2YQL2;A0A7I2V3T6	BTF3_HUMAN	BTF3	Isoform of P20290, Isoform 2 of Transcription factor BTF3	20.5043	20.296	19.0148	21.1033	21.2138	21.6796
+	2.35433	2.55622	P20340;P20340-2	Q9NRW1;P20340;C9J0I2;P20340-2;P20340-3;F5GX61;F5H3K7	RAB6A_HUMAN	RAB6A	Ras-related protein Rab-6A	17.9591	17.7966	17.3952	14.8846	14.633	15.9646
+	2.84432	1.25265	P20618	P20618	PSB1_HUMAN	PSMB1	Proteasome subunit beta type-1	20.1269	20.355	20.254	19.242	18.7378	18.9982
+	1.23242	1.14108	P20674	P20674;H3BNX8	COX5A_HUMAN	COX5A	Cytochrome c oxidase subunit 5A, mitochondrial	17.0347	17.429	17.9511	16.8381	16.4802	15.6732
+	1.07059	0.587013	P20700	P20700;E9PBF6;A0A0D9SFE5	LMNB1_HUMAN	LMNB1	Lamin-B1	19.0894	19.2283	19.4054	18.7964	18.9815	18.1841
+	4.24952	1.27391	P20810-10;P20810-6	P20810;P20810-10;A0A6Q8PFF6;A0A6Q8PFE5;E7EVY3;A0A6Q8PG72;A0A6Q8PGN6;A0A6Q8PGG5;A0A6Q8PH20;E7ES10;P20810-2;P20810-3;P20810-4;P20810-5;P20810-6;P20810-7;P20810-8;P20810-9;F8W7E0;H0YA91;B7Z574;E9PSG1;E9PCH5;E9PDE4;A0A0C4DGB5	ICAL_HUMAN	CAST	Isoform of P20810, Isoform 10 of Calpastatin	20.2825	20.2196	20.3668	19.1287	18.9527	18.9659
+	3.47323	0.948532	P20839;P20839-3;P20839-5;P20839-6;P20839-7	P20839;C9J381;P20839-2;P20839-3;P20839-4;P20839-5;P20839-6;P20839-7;A0A3B3IRL5	IMDH1_HUMAN	IMPDH1	Inosine-5'-monophosphate dehydrogenase 1	20.8755	20.6723	20.8368	19.8009	19.9559	19.7822
+	3.72553	3.1462	P20962	P20962	PTMS_HUMAN	PTMS	Parathymosin	18.6018	17.9601	18.6768	15.204	15.1915	15.4046
+	3.34328	0.235726	P21127	Q9UQ88;P21127;Q9UQ88-2;Q9UQ88-3;Q9UQ88-4;Q9UQ88-9;P21127-10;P21127-12;A0A0D9SEI3;A0A0D9SEN2;A0A0D9SER5;P21127-2;P21127-3;P21127-4;P21127-5;P21127-6;P21127-8;P21127-9;Q9UQ88-10;Q5QPR3;Q5QPR4	CD11B_HUMAN	CDK11B	Cyclin-dependent kinase 11B	22.3622	22.3989	22.3419	22.1606	22.1109	22.1245
+	1.13128	1.07698	P21266	P21266	GSTM3_HUMAN	GSTM3	Glutathione S-transferase Mu 3	18.4223	18.8238	18.8247	17.6828	18.316	16.8411
+	5.11985	1.21259	P21291	P21291;E9PS42;E9PND2;E9PP21	CSRP1_HUMAN	CSRP1	Cysteine and glycine-rich protein 1	19.0757	18.9376	19.0122	17.8014	17.7797	17.8064
+	4.06951	1.26598	P21333;P21333-2	P21333;A0A7P0NMY4;Q60FE5;P21333-2	FLNA_HUMAN	FLNA	Filamin-A	23.9007	23.8493	23.8851	22.4786	22.6143	22.7443
+	2.99729	0.698751	P21359-2;P21359-6	P21359;P21359-2;P21359-6;H0Y465;A0A8I5KSM3;A0A8I5KSC3;A0A8Q3WL04;A0A8I5KWR6;A0A8I5KWT7;A0A8I5KYK6;J3QSG6	NF1_HUMAN	NF1	Isoform of P21359, Isoform I of Neurofibromin	20.3544	20.457	20.4419	19.7114	19.5935	19.8521
+	2.33591	3.66461	P21399	P21399	ACOHC_HUMAN	ACO1	Cytoplasmic aconitate hydratase	18.94	19.3595	17.9425	14.4947	14.7127	16.0408
+	6.36659	1.2863	P21589	P21589;P21589-2;H0Y7R7	5NTD_HUMAN	NT5E	5'-nucleotidase	21.0986	21.1077	21.0886	19.8173	19.7745	19.8442
+	3.0915	0.290017	P22087	P22087;M0R1H0;M0R0P1;M0R2Q4;M0R2U2;M0R2B0;M0R299;M0QXL5	FBRL_HUMAN	FBL	rRNA 2'-O-methyltransferase fibrillarin	24.6935	24.681	24.6616	24.3722	24.3461	24.4478
+	2.65637	0.77809	P22102	P22102;F8WD69;C9JZG2;C9JTV6;C9JKQ7;P22102-2;C9JBJ1	PUR2_HUMAN	GART	Trifunctional purine biosynthetic protein adenosine-3	20.4457	20.4225	20.2735	19.4646	19.5522	19.7906
+	2.95111	1.35907	P22234	P22234;P22234-2;E9PBS1;D6RF62	PUR6_HUMAN	PAICS	Bifunctional phosphoribosylaminoimidazole carboxylase/phosphoribosylaminoimidazole succinocarboxamide synthetase	21.2142	20.986	21.2927	19.5446	19.99	19.881
+	2.40005	1.08485	P22314;P22314-2	P22314;P22314-2	UBA1_HUMAN	UBA1	Ubiquitin-like modifier-activating enzyme 1	20.0572	19.8102	20.4094	18.9064	19.0907	19.0252
+	1.49678	1.20583	P22392	O60361;P22392;P22392-2;Q32Q12	NDKB_HUMAN	NME2	Nucleoside diphosphate kinase B	21.2084	20.9855	20.714	20.2371	19.9597	19.0936
+	1.68935	0.269999	P22626	P22626;P22626-2;A0A024RA28;A0A087WUI2;A0A7I2V323;A0A7I2V3P1;A0A7I2V3P7;A0A7I2V4I6;A0A7I2V4N1;A0A7I2V4S4	ROA2_HUMAN	HNRNPA2B1	Heterogeneous nuclear ribonucleoproteins A2/B1	22.5466	22.4761	22.399	22.2282	22.2913	22.0923
+	2.16365	-0.302411	P22694	P22694;P17612;P22694-10;P17612-2;A0A8V8TL59;P22694-2;P22694-3;P22694-4;P22694-5;P22694-6;P22694-7;P22694-9;A0A087WVC4;A0A7I2V5J4	KAPCB_HUMAN	PRKACB	cAMP-dependent protein kinase catalytic subunit beta	19.417	19.5152	19.548	19.7279	19.7814	19.8781
+	2.00064	1.7726	P23229;P23229-2;P23229-3;P23229-4;P23229-5;P23229-6;P23229-9	P23229;P23229-5;P23229-6;P23229-9;P23229-2;P23229-3;P23229-4;P23229-7;A0A8C8KBL6;H7BZ97	ITA6_HUMAN	ITGA6	Integrin alpha-6	21.9561	22.3496	21.3177	20.3009	20.3809	19.6237
+	3.30838	0.940829	P23246	P23246;A0A8Q3WMA7;P23246-2	SFPQ_HUMAN	SFPQ	Splicing factor, proline- and glutamine-rich	22.6727	22.4914	22.4925	21.6818	21.677	21.4753
+	1.5347	0.49908	P23258	P23258;Q9NRH3;A0A7P0T9G6	TBG1_HUMAN	TUBG1	Tubulin gamma-1 chain	21.5001	21.5533	21.1629	20.7682	20.8838	21.067
+	2.13818	0.893241	P23284	P23284;A0A7P0TB45;A0A7P0Z497	PPIB_HUMAN	PPIB	Peptidyl-prolyl cis-trans isomerase B	22.1472	21.8323	22.0697	20.8971	21.066	21.4063
+	3.72709	1.04493	P23381	P23381;G3V5W1;G3V4S4;G3V5H5;G3V3P2;G3V3R3;G3V3S7;G3V3X0;G3V4A3;G3V4C7;G3V4N0;G3V4N8;G3V4Q0;G3V313;G3V339;G3V2Y7;G3V227;G3V277;G3V2C0;G3V2F2;P78534	SYWC_HUMAN	WARS1	Tryptophan--tRNA ligase, cytoplasmic	19.3682	19.3444	19.2344	18.169	18.2455	18.3977
+	3.34549	0.666702	P23458	P23458;A0A5F9ZH07;A0A5F9ZHN8;A0A5F9ZI39;A0A5F9ZHW0;A0A0A0N0M2;A0A8V8TPQ9;A0A8V8TMY8	JAK1_HUMAN	JAK1	Tyrosine-protein kinase JAK1	20.9664	21.0062	21.0072	20.3444	20.2122	20.4232
+	1.66913	1.14634	P23468-4;P23468-5;P23468-6;P23468-7	P23468;Q13332;Q13332-2;Q13332-3;Q13332-4;Q13332-5;Q13332-6;Q13332-7;Q3KPI9;A0A0U1RQU1;G8JL96;P23468-2;P23468-3;P23468-4;P23468-5;P23468-6;P23468-7;F5GWR7	PTPRD_HUMAN	PTPRD	Isoform of P23468, Isoform 4 of Receptor-type tyrosine-protein phosphatase delta	19.8134	19.5993	20.3672	18.3723	18.879	19.0895
+	3.38466	1.12988	P23526	P23526;P23526-2	SAHH_HUMAN	AHCY	Adenosylhomocysteinase	20.8465	20.7751	20.8824	19.8644	19.7278	19.5222
+	3.9004	1.45918	P23528	Q9Y281;P23528;Q9Y281-3;G3V1A4;E9PQB7;E9PP50;E9PLJ3;E9PK25	COF1_HUMAN	CFL1	Cofilin-1	21.7584	21.692	21.7255	20.1909	20.4598	20.1476
+	3.05578	0.931966	P23588	P23588;E7EX17;P23588-2	IF4B_HUMAN	EIF4B	Eukaryotic translation initiation factor 4B	23.1958	23.1133	23.176	22.0949	22.429	22.1654
+	3.82131	1.03115	P23921	P23921;E9PL69	RIR1_HUMAN	RRM1	Ribonucleoside-diphosphate reductase large subunit	20.3356	20.1615	20.3524	19.1705	19.282	19.3036
+	4.58698	1.66218	P24534	P24534;C9JZW3	EF1B_HUMAN	EEF1B2	Elongation factor 1-beta	24.3216	24.2462	24.2679	22.5657	22.7597	22.5238
+	1.41781	3.66284	P24666	P24666;G5E9R5;P24666-4	PPAC_HUMAN	ACP1	Low molecular weight phosphotyrosine protein phosphatase	19.4771	19.401	20.1812	15.6593	18.2197	14.1917
+	3.11019	1.03349	P24844	P24844	MYL9_HUMAN	MYL9	Myosin regulatory light polypeptide 9	27.5776	27.7073	27.6659	26.4926	26.5309	26.8269
+	3.66714	-0.636159	P24928	P24928;A0A6Q8PGB0	RPB1_HUMAN	POLR2A	DNA-directed RNA polymerase II subunit RPB1	21.2314	21.1503	21.0677	21.7865	21.7588	21.8126
+	1.48894	0.792692	P24941	P24941;E7ESI2;G3V5T9;P24941-2	CDK2_HUMAN	CDK2	Cyclin-dependent kinase 2	19.17	19.6647	19.642	19.0722	18.5292	18.4972
+	2.73786	0.604179	P25054	P25054;E9PFT7;P25054-2;P25054-3	APC_HUMAN	APC	Adenomatous polyposis coli protein	19.6982	19.8025	19.7257	18.9868	19.1982	19.2288
+	5.32718	1.0691	P25205	P25205;J3KQ69;A0A499FHX9;P25205-2	MCM3_HUMAN	MCM3	DNA replication licensing factor MCM3	22.7239	22.7031	22.6632	21.6247	21.5834	21.6748
+	0.877684	2.28925	P25311	P25311;C9JEV0	ZA2G_HUMAN	AZGP1	Zinc-alpha-2-glycoprotein	20.1284	20.3092	19.6405	19.1085	18.7522	15.3497
+	1.6471	0.311967	P25398	P25398	RS12_HUMAN	RPS12	40S ribosomal protein S12	30.2308	30.2034	30.3863	29.9584	30.0757	29.8506
+	2.55455	1.44324	P25685	P25685;P25685-2;A0A7I2V3K7	DNJB1_HUMAN	DNAJB1	DnaJ homolog subfamily B member 1	18.6218	18.3071	18.9074	16.966	17.1152	17.4255
+	4.06868	0.799357	P25705	P25705;P25705-2;K7EK77;K7EJP1;K7ENJ4;K7EQH4;K7ERX7	ATPA_HUMAN	ATP5F1A	ATP synthase subunit alpha, mitochondrial	22.2671	22.4198	22.381	21.5275	21.5514	21.5908
+	3.43102	1.16108	P25786;P25786-2	P25786;F5GX11;P25786-2	PSA1_HUMAN	PSMA1	Proteasome subunit alpha type-1	21.0896	21.1369	21.1907	20.1734	19.8425	19.918
+	2.30405	0.758919	P25787	P25787;A0A024RA52;A0A7I2V2H3	PSA2_HUMAN	PSMA2	Proteasome subunit alpha type-2	20.0203	20.1793	19.9939	19.094	19.3052	19.5177
+	3.41098	1.53447	P25788;P25788-2	P25788;G3V5N4;G3V3W4;P25788-2	PSA3_HUMAN	PSMA3	Proteasome subunit alpha type-3	19.9108	20.3086	20.0865	18.6858	18.5986	18.4181
+	1.34734	0.743795	P25789	P25789;H0YN18;H0YMZ1;H0YL69;P25789-2	PSA4_HUMAN	PSMA4	Proteasome subunit alpha type-4	20.6694	20.8262	20.6567	19.7684	19.6771	20.4755
+	2.35831	1.93404	P25815	P25815	S100P_HUMAN	S100P	Protein S100-P	19.2384	19.1356	19.0575	17.7195	17.3154	16.5944
+	3.5416	0.827174	P26038	P26038;V9GZ54;A0A8V8TKR9	MOES_HUMAN	MSN	Moesin	22.1983	22.0729	22	21.2103	21.3384	21.241
+	1.7504	1.23412	P26045	P26045;P26045-2;P26045-3	PTN3_HUMAN	PTPN3	Tyrosine-protein phosphatase non-receptor type 3	16.8027	17.1744	16.5795	15.8866	15.8818	15.0859
+	3.34972	1.08649	P26358	P26358;P26358-2;P26358-3;A0A7I2YQA8;A0A7I2YQQ0;A0A7I2V311;A0A7I2V490;A0A7I2V5F1;A0A7I2V5F6;A0A7I2V5D0	DNMT1_HUMAN	DNMT1	DNA (cytosine-5)-methyltransferase 1	21.5489	21.5121	21.2529	20.3086	20.3091	20.4367
+	2.7878	0.549323	P26368;P26368-2	P26368;P26368-2;K7ELP8	U2AF2_HUMAN	U2AF2	Splicing factor U2AF 65 kDa subunit	25.8463	25.7994	25.64	25.2853	25.1874	25.165
+	3.6384	1.49259	P26447	P26447	S10A4_HUMAN	S100A4	Protein S100-A4	22.1963	21.9775	21.9351	20.4798	20.7154	20.436
+	1.53379	0.568143	P26583	P26583;D6R9A6	HMGB2_HUMAN	HMGB2	High mobility group protein B2	23.553	23.3958	22.9966	22.8147	22.757	22.6693
+	2.48089	0.50272	P26599;P26599-1;P26599-2	P26599;A0A0U1RRM4;P26599-1;P26599-2;A6NLN1;A0A0D9SF20;A0A7I2V621	PTBP1_HUMAN	PTBP1	Polypyrimidine tract-binding protein 1	21.2455	21.2729	21.4439	20.8402	20.8928	20.7211
+	3.91025	1.24205	P26639	P26639;A2RTX5;P26639-2;B7ZLP8;A2RTX5-2	SYTC_HUMAN	TARS1	Threonine--tRNA ligase 1, cytoplasmic	22.6376	22.532	22.4661	21.2446	21.2266	21.4384
+	3.79032	1.12264	P26640	P26640;A0A140T936;A0A140T954	SYVC_HUMAN	VARS1	Valine--tRNA ligase	22.5548	22.6273	22.3862	21.4527	21.4251	21.3225
+	3.19002	1.31219	P26641	P26641;P26641-2	EF1G_HUMAN	EEF1G	Elongation factor 1-gamma	24.0952	24.1715	23.7475	22.6446	22.7684	22.6647
+	0.967305	1.37455	P26885	P26885;A0A494C1N0	FKBP2_HUMAN	FKBP2	Peptidyl-prolyl cis-trans isomerase FKBP2	18.8069	18.4106	18.5811	15.9147	17.8376	17.9228
+	3.04442	0.874886	P27105	P27105;P27105-2	STOM_HUMAN	STOM	Stomatin	21.3075	21.441	21.5953	20.4942	20.5496	20.6754
+	0.992085	2.00614	P27144	P27144;A0A8I5KW96;F8VS11	KAD4_HUMAN	AK4	Adenylate kinase 4, mitochondrial	18.3802	18.0229	16.476	14.9183	17.1129	14.8295
+	2.95096	1.06852	P27348	P27348;E9PG15	1433T_HUMAN	YWHAQ	14-3-3 protein theta	20.4872	20.7572	20.8064	19.512	19.7739	19.5594
+	0.959985	1.33705	P27361;P27361-2	P27361;P27361-2;P27361-3;E9PQW4;E9PJF0	MK03_HUMAN	MAPK3	Mitogen-activated protein kinase 3	17.1162	17.302	17.0479	16.863	15.9593	14.6327
+	2.81922	0.475577	P27448;P27448-3;P27448-4	P27448;J3KNR0;H0YNV4;H0YKP9;H0YJI9;H0YIY6;P27448-2;P27448-3;P27448-4;P27448-6;P27448-7;P27448-8;A0A7I2YQF7;A0A7I2V2E3;A0A7I2V2I9;A0A7I2V2N8;A0A7I2V2U9;A0A7I2V3B9;A0A7I2V3C6;A0A7I2V3I9;A0A7I2V3K2;A0A7I2V409;A0A7I2V3P5;A0A7I2V4K8;A0A7I2V4G7;A0A7I2V4T2;A0A7I2V5G3;A0A7I2V639	MARK3_HUMAN	MARK3	MAP/microtubule affinity-regulating kinase 3	21.6567	21.673	21.7906	21.1952	21.3204	21.178
+	3.43649	1.20772	P27695	P27695;G3V5Q1;G3V3M6;H7C4A8	APEX1_HUMAN	APEX1	DNA-(apurinic or apyrimidinic site) endonuclease	21.1932	21.1382	21.0483	20.0941	19.7494	19.9131
+	2.60375	0.788363	P27708	P27708;F8VPD4;H7C2E4	PYR1_HUMAN	CAD	CAD protein	20.9226	20.9086	21.0668	20.0318	20.1197	20.3814
+	3.02479	1.43798	P27797	P27797;K7EJB9;A0A7P0T861;K7EL50	CALR_HUMAN	CALR	Calreticulin	21.5696	21.3855	21.4717	19.7283	20.2238	20.1608
+	4.46465	1.41901	P27816	P27816;E7EVA0;P27816-2;P27816-6;A0A804HKE7	MAP4_HUMAN	MAP4	Microtubule-associated protein 4	22.6273	22.5281	22.5509	21.2398	21.1808	21.0287
+	1.4878	0.337973	P27816-4	E7EVA0;P27816-4;B5MEG9;A0A804HKE7	MAP4_HUMAN	MAP4	Isoform of P27816, Isoform 4 of Microtubule-associated protein 4	18.9691	18.8974	18.8617	18.5664	18.7477	18.4001
+	2.79193	1.19841	P27824;P27824-2	P27824;D6RAU8;A0A7P0T9L0;A0A7P0T8G1;A0A7P0T8N1;A0A7P0T937;A0A7P0T840;P27824-2;A0A7P0TB65;A0A7P0TAE9;A0A7P0TAN9;A0A7P0TAR9;A0A7P0Z4H2;A0A7P0Z484;A0A7P0Z4D6	CALX_HUMAN	CANX	Calnexin	20.282	20.3437	20.1786	19.1508	19.2799	18.7785
+	5.1347	1.12346	P28066	P28066;P28066-2	PSA5_HUMAN	PSMA5	Proteasome subunit alpha type-5	20.2315	20.1459	20.1693	19.0738	19.0057	19.0968
+	2.07022	1.14656	P28070	P28070	PSB4_HUMAN	PSMB4	Proteasome subunit beta type-4	19.4723	18.8564	19.0949	18.1661	17.6829	18.1349
+	3.46442	1.37367	P28072	P28072;I3L3X7;A0A087X2I4	PSB6_HUMAN	PSMB6	Proteasome subunit beta type-6	20.3149	20.3386	20.4691	18.9908	18.8131	19.1976
+	3.72838	1.02573	P28074	P28074;P28074-3	PSB5_HUMAN	PSMB5	Proteasome subunit beta type-5	19.6965	19.884	19.7208	18.8133	18.7659	18.6449
+	1.40185	0.611034	P28288	P28288;A0A3B3ITW3	ABCD3_HUMAN	ABCD3	ATP-binding cassette sub-family D member 3	18.8356	18.8575	18.2721	18.1693	17.9374	18.0254
+	3.29294	1.07795	P28289	P28289	TMOD1_HUMAN	TMOD1	Tropomodulin-1	20.5831	20.5353	20.6118	19.4045	19.3879	19.7039
+	3.38207	1.56828	P28300	P28300;A0A7P0SNB0	LYOX_HUMAN	LOX	Protein-lysine 6-oxidase	19.3206	19.3465	19.2006	17.4714	17.7441	17.9474
+	3.27165	0.335622	P28370	P28370;B7ZLQ5;A0A0A0MRP6;P28370-2	SMCA1_HUMAN	SMARCA1	Probable global transcription activator SNF2L1	20.9401	20.911	20.8615	20.6005	20.5835	20.5218
+	2.43161	0.624723	P28715	P28715;A0A090HNM7;A0A494C0S2;R4GMW8;A0A1W2PS85	ERCC5_HUMAN	ERCC5	DNA excision repair protein ERCC-5	18.8365	18.9577	18.7076	18.2318	18.323	18.0728
+	2.27072	0.75091	P29083	P29083;E9PER7	T2EA_HUMAN	GTF2E1	General transcription factor IIE subunit 1	19.2662	19.3216	18.8979	18.3502	18.459	18.4238
+	1.27487	0.603983	P29084	P29084	T2EB_HUMAN	GTF2E2	Transcription initiation factor IIE subunit beta	20.9968	20.8004	20.5522	20.419	20.2947	19.8239
+	2.05787	0.799712	P29144	P29144;Q5VZU9;A0A494C1L2;A0A494C0U1;A0A494C1B8	TPP2_HUMAN	TPP2	Tripeptidyl-peptidase 2	19.6325	19.7263	20.0328	18.7782	19.17	19.0443
+	1.89114	0.890891	P29353;P29353-2;P29353-6;P29353-7	P29353;H0Y539;X6R6D0;P29353-2;P29353-3;P29353-5;P29353-6;P29353-7	SHC1_HUMAN	SHC1	SHC-transforming protein 1	15.9724	15.7923	16.3923	15.1154	15.3677	15.0012
+	1.23063	-0.380175	P29372;P29372-2;P29372-4;P29372-5	P29372;P29372-2;P29372-4;P29372-5	3MG_HUMAN	MPG	DNA-3-methyladenine glycosylase	20.4494	20.4756	20.6472	20.7353	20.815	21.1625
+	3.54969	1.71629	P29373	P29373;Q5SYZ4	RABP2_HUMAN	CRABP2	Cellular retinoic acid-binding protein 2	19.8226	19.5514	19.9086	17.8779	18.208	18.0478
+	3.33744	1.33935	P29401;P29401-2	P29401;P29401-2	TKT_HUMAN	TKT	Transketolase	22.0961	21.857	21.7177	20.4977	20.6763	20.4787
+	2.6188	0.853994	P29558;P29558-2	P29558;E7ETU5;P29558-2	RBMS1_HUMAN	RBMS1	RNA-binding motif, single-stranded-interacting protein 1	20.3303	20.3127	20.6799	19.5215	19.6481	19.5913
+	4.0885	1.33061	P29692	P29692;H0YCK7;E9PRY8;E9PPR1;E9PQ49;E9PQZ1;E9PMW7;E9PN91;E9PNW6;E9PL71;P29692-2;P29692-3;P29692-4;E9PIZ1;E9PK01;E9PK06;E9PJD0;E9PK72;E9PKK3;E9PL12;E9PI39;A0A087X1X7	EF1D_HUMAN	EEF1D	Elongation factor 1-delta	25.0457	24.9982	24.7852	23.6391	23.5917	23.6064
+	1.10401	1.42678	P29692-2	A0A8C8L741;E9PRL0;E9PRY8;E9PPY1;E9PQR8;E9PNC8;P29692-2;E9PN56;E9PN71;E9PJV8;E9PKH7;A0A087X1X7	EF1D_HUMAN	EEF1D	Isoform of P29692, Isoform 2 of Elongation factor 1-delta	18.7973	18.9107	18.2414	16.0819	17.7388	17.8484
+	2.30874	1.61953	P29692-3	E9PN91;E9PL71;P29692-3	EF1D_HUMAN	EEF1D	Isoform of P29692, Isoform 3 of Elongation factor 1-delta	17.5777	17.2362	17.3573	15.9502	16.1224	15.2401
+	3.18917	1.38117	P29966	P29966	MARCS_HUMAN	MARCKS	Myristoylated alanine-rich C-kinase substrate	21.6756	21.7458	21.8781	20.2187	20.6423	20.295
+	4.15753	1.50903	P29992	P29992;K7EL62	GNA11_HUMAN	GNA11	Guanine nucleotide-binding protein subunit alpha-11	23.4142	23.5392	23.5751	21.9219	22.1482	21.9313
+	2.35113	2.29582	P30040	P30040;F8VY02	ERP29_HUMAN	ERP29	Endoplasmic reticulum resident protein 29	19.704	19.1148	19.5724	16.7026	17.8648	16.9363
+	2.38578	1.38614	P30041	P30041	PRDX6_HUMAN	PRDX6	Peroxiredoxin-6	21.9388	21.6438	22.1787	20.7053	20.7162	20.1813
+	3.53339	1.61076	P30044;P30044-2	P30044;P30044-2;P30044-3	PRDX5_HUMAN	PRDX5	Peroxiredoxin-5, mitochondrial	20.0625	19.7027	19.9554	18.3779	18.3838	18.1267
+	1.0017	2.37338	P30048;P30048-2	P30048;P30048-2	PRDX3_HUMAN	PRDX3	Thioredoxin-dependent peroxide reductase, mitochondrial	19.6541	19.4348	19.4206	18.2913	18.1853	14.9128
+	2.03909	0.251369	P30050	P30050;P30050-2	RL12_HUMAN	RPL12	60S ribosomal protein L12	30.2065	30.1761	30.2058	30.0198	29.9703	29.8442
+	2.79033	1.29025	P30085;P30085-3	P30085;A0A494BXC7;P30085-2;P30085-3	KCY_HUMAN	CMPK1	UMP-CMP kinase	19.5902	19.3553	19.6492	18.5028	18.2171	18.004
+	2.78589	2.04654	P30086	P30086	PEBP1_HUMAN	PEBP1	Phosphatidylethanolamine-binding protein 1	20.5595	20.2352	20.2093	18.1305	18.7705	17.9633
+	2.91747	1.72564	P30101	P30101;A0A8I5QKQ5;A0A8I5QJM1;H7BZJ3;A0A8I5KNU9;A0A8I5KP58;A0A8I5KPY2;A0A8I5KRV3;A0A8I5KS72;A0A8I5KT88;A0A8I5KW33;A0A8I5KW00;A0A8I5KXE2;A0A8I5KYJ6;A0A8I5KXC9	PDIA3_HUMAN	PDIA3	Protein disulfide-isomerase A3	20.7456	20.4062	20.6945	18.8308	19.2308	18.6079
+	3.636	0.824664	P30153	P30153;B3KQV6	2AAA_HUMAN	PPP2R1A	Serine/threonine-protein phosphatase 2A 65 kDa regulatory subunit A alpha isoform	20.4206	20.324	20.4772	19.4895	19.6498	19.6085
+	0.945923	-0.911933	P30154	P30154;P30154-4;P30154-5	2AAB_HUMAN	PPP2R1B	Serine/threonine-protein phosphatase 2A 65 kDa regulatory subunit A beta isoform	17.5036	17.9343	17.9335	18.2477	18.3024	19.5571
+	4.07014	-1.02639	P30260-2	P30260;P30260-2;G5EA36	CDC27_HUMAN	CDC27	Isoform of P30260, Isoform 2 of Cell division cycle protein 27 homolog	19.2416	19.3772	19.2441	20.3214	20.2329	20.3878
+	1.39674	2.32574	P30408	P30408;F8WF27;F8WBG6	T4S1_HUMAN	TM4SF1	Transmembrane 4 L6 family member 1	18.6956	19.0782	18.6878	18.018	15.5986	15.8676
+	2.71399	0.366623	P30419	P30419;O60551;P30419-2;Q5VUC6;A0A7I2V3U5;A0A7I2V3X4;A0A7I2V539	NMT1_HUMAN	NMT1	Glycylpeptide N-tetradecanoyltransferase 1	23.0054	22.928	22.9284	22.5216	22.6699	22.5705
+	2.34885	1.71434	P30533	P30533	AMRP_HUMAN	LRPAP1	Alpha-2-macroglobulin receptor-associated protein	22.0186	21.7969	21.7037	20.3229	20.4843	19.5691
+	1.48007	1.09451	P30566;P30566-2	P30566;A0A096LNY4;A0A096LNY5;A0A096LNY6;A0A096LP92;A0A096LP72;A0A7P0T8E4;A0A7P0T9A7;A0A1B0GTJ7;A0A1B0GTG9;A0A1B0GWJ0;A0A1B0GWF8;B4DEP1;P30566-2;A0A0A6YY92;A0A7P0Z472	PUR8_HUMAN	ADSL	Adenylosuccinate lyase	17.5716	18.0492	17.8986	16.8351	17.2359	16.1649
+	1.36138	0.647888	P30622-2	P30622;J3KP58;P30622-1;P30622-2;F5H6A0;F5H1T5	CLIP1_HUMAN	CLIP1	Isoform of P30622, Isoform 3 of CAP-Gly domain-containing linker protein 1	19.3558	18.9141	19.6359	18.527	18.7794	18.6558
+	4.13576	-0.67067	P30876	P30876;C9J2Y9;C9J4M6	RPB2_HUMAN	POLR2B	DNA-directed RNA polymerase II subunit RPB2	20.2335	20.329	20.2666	20.9046	20.9356	21.0009
+	2.79155	3.362	P31025;Q5VSP4	Q5VSP4;P31025	LC1L1_HUMAN;LCN1_HUMAN	LCN1;LCN1P1	Lipocalin-1	18.1943	18.7075	18.7296	15.8589	14.4521	15.2343
+	3.44259	1.04551	P31153	P31153;P31153-2	METK2_HUMAN	MAT2A	S-adenosylmethionine synthase isoform type-2	20.6344	20.5353	20.3706	19.5196	19.5218	19.3624
+	3.46846	0.851067	P31327;P31327-3	P31327;P31327-3	CPSM_HUMAN	CPS1	Carbamoyl-phosphate synthase [ammonia], mitochondrial	21.7735	21.6883	21.9239	21.0006	20.9289	20.903
+	1.90492	0.58446	P31350;P31350-2	P31350;Q7LG56;A0A7P0SBL1;P31350-2;H0YAV1;A0A286YFD6;Q7LG56-2;Q7LG56-6	RIR2_HUMAN	RRM2	Ribonucleoside-diphosphate reductase subunit M2	18.2883	18.3102	18.4835	17.9964	17.7503	17.5818
+	2.31988	-2.42641	P31431	P31431;P31431-2	SDC4_HUMAN	SDC4	Syndecan-4	16.145	15.5491	16.9156	18.806	18.7815	18.3013
+	3.21123	0.751881	P31689	P31689;P31689-2	DNJA1_HUMAN	DNAJA1	DnaJ homolog subfamily A member 1	22.1833	22.2492	22.0299	21.4507	21.3203	21.4358
+	2.91629	0.931027	P31939	P31939;P31939-2;H7C1S2	PUR9_HUMAN	ATIC	Bifunctional purine biosynthesis protein ATIC	19.3879	19.1638	19.3027	18.4603	18.1683	18.4328
+	3.51737	0.510603	P31943	P31943;G8JLB6;H0YB39	HNRH1_HUMAN	HNRNPH1	Heterogeneous nuclear ribonucleoprotein H	24.6221	24.5199	24.6172	24.0945	24.1125	24.0205
+	3.7309	0.872202	P31946;P31946-2	P31946;P31946-2	1433B_HUMAN	YWHAB	14-3-3 protein beta/alpha	21.1585	21.0419	21.1731	20.2125	20.3533	20.1911
+	1.14006	1.07414	P31947	P31947;P31947-2	1433S_HUMAN	SFN	14-3-3 protein sigma	18.964	18.997	19.1681	18.8243	17.7092	17.3732
+	2.95705	1.13593	P31948	P31948;P31948-2;F5GXD8;F5H783	STIP1_HUMAN	STIP1	Stress-induced-phosphoprotein 1	21.3698	21.3038	21.273	19.9556	20.4137	20.1696
+	3.25478	1.11232	P32004;P32004-2;P32004-3	P32004;H0Y5C3;P32004-2;P32004-3	L1CAM_HUMAN	L1CAM	Neural cell adhesion molecule L1	20.2807	20.3269	20.1113	19.1056	19.2921	18.9843
+	1.41749	0.851757	P32119	P32119	PRDX2_HUMAN	PRDX2	Peroxiredoxin-2	21.934	22.0337	21.8487	21.5748	21.0618	20.6245
+	1.31667	0.532567	P32322	P32322;P32322-3;E2QRB3	P5CR1_HUMAN	PYCR1	Pyrroline-5-carboxylate reductase 1, mitochondrial	19.6396	19.2921	19.1964	18.9685	18.5772	18.9847
+	3.08051	1.42241	P32754;P32754-2	P32754;P32754-2;A0A0B4J1R4	HPPD_HUMAN	HPD	4-hydroxyphenylpyruvate dioxygenase	20.342	20.0478	20.2232	18.8915	18.9355	18.5187
+	2.39423	3.32439	P32929;P32929-3	P32929;P32929-3	CGL_HUMAN	CTH	Cystathionine gamma-lyase	19.2488	19.5184	19.7349	15.098	16.8108	16.6202
+	4.88148	1.14187	P33176	O60282;Q12840;P33176;J3KNA1;O60282-2;A0A6Q8PGN1;A0A6Q8PGJ3;A0A6Q8PGG7;A0A6Q8PEZ8;A0A0G2JMZ6;A0A7I2YQQ7;A0A7I2V352;A0A7I2V3N5;A0A7I2V492;A0A7I2V581	KINH_HUMAN	KIF5B	Kinesin-1 heavy chain	21.0947	21.087	21.1145	20.0273	19.9651	19.8781
+	2.35211	0.903114	P33316;P33316-2	P33316;H0YNW5;H0YMM5;H0YMP1;H0YNJ9;H0YKI0;H0YKC5;P33316-2;A0A0C4DGL3	DUT_HUMAN	DUT	Deoxyuridine 5'-triphosphate nucleotidohydrolase, mitochondrial	19.5356	19.2402	19.7264	18.4661	18.678	18.6488
+	1.57804	0.561002	P33991	P33991;A0A3B3IS57;A0A3B3IT92;A0A3B3IU45;E5RG31	MCM4_HUMAN	MCM4	DNA replication licensing factor MCM4	20.154	20.1818	20.3466	19.3769	19.7318	19.8906
+	3.7934	0.8979	P33992	P33992;B1AHB1	MCM5_HUMAN	MCM5	DNA replication licensing factor MCM5	22.0156	21.912	21.8789	21.0114	20.9662	21.1352
+	2.89232	0.620198	P33993	P33993;P33993-3	MCM7_HUMAN	MCM7	DNA replication licensing factor MCM7	20.6976	20.7413	20.5847	19.9746	20.0141	20.1743
+	0.955386	1.27687	P34059	P34059	GALNS_HUMAN	GALNS	N-acetylgalactosamine-6-sulfatase	14.3866	14.3829	16.2527	13.6347	13.7136	13.8433
+	4.8173	-1.53575	P34741	P34741;E7ESK6;E9PBI9;E5RJB8;E5RHU3	SDC2_HUMAN	SDC2	Syndecan-2	20.3885	20.3982	20.2837	21.9548	21.9277	21.7951
+	1.1502	3.38798	P34896	P34896;J3KRK5;J3KRZ5;P34896-2;P34896-3	GLYC_HUMAN	SHMT1	Serine hydroxymethyltransferase, cytosolic	19.0383	19.9533	18.9275	15.4202	13.8754	18.4595
+	2.95988	1.06429	P34897;P34897-3	P34897;G3V4T0;G3V540;G3V4W5;G3V4X0;G3V5L0;G3V3Y8;G3V2W0;G3V241;G3V2E4;P34897-2;P34897-3	GLYM_HUMAN	SHMT2	Serine hydroxymethyltransferase, mitochondrial	20.6856	20.4343	20.7618	19.4898	19.7208	19.4782
+	2.40481	1.28661	P34932	P34932	HSP74_HUMAN	HSPA4	Heat shock 70 kDa protein 4	20.7378	20.7426	21.1585	19.2711	19.6999	19.8081
+	1.44657	0.923284	P35030;P35030-2;P35030-3;P35030-4;P35030-5	P35030;P35030-2;P35030-3;P35030-4;P35030-5;A0A7P0MNE9	TRY3_HUMAN	PRSS3	Trypsin-3	20.7111	20.9242	20.0231	19.5116	19.8664	19.5106
+	2.05956	0.316879	P35052	P35052;H7BZL4;H7C410;H7C024	GPC1_HUMAN	GPC1	Glypican-1	20.6604	20.8172	20.8606	20.4754	20.4123	20.4999
+	3.63784	0.681498	P35221	P35221;P26232;P35221-2;P35221-3;A0A0A0MTJ6;A0A0A0MRI5;G3XAM7;P26232-2;P26232-3;P26232-4;P26232-5;P26232-6	CTNA1_HUMAN	CTNNA1	Catenin alpha-1	21.6336	21.7147	21.8207	21.0388	21.0448	21.0409
+	2.91476	0.523804	P35222	P35222;A0A2R8Y7Z0;A0A2R8Y804;A0A2R8Y750;A0A2R8Y6G0;A0A2R8Y5Z1;A0A2R8Y5A3;A0A2R8Y5C3;A0A2R8Y543;A0A2R8YCH5;B4DGU4	CTNB1_HUMAN	CTNNB1	Catenin beta-1	22.0378	22.152	22.2132	21.6847	21.5578	21.5891
+	3.10521	1.11183	P35226	P35226;Q5T8Z2;Q5T8Z4;Q5T8Z6;R4GMX3	BMI1_HUMAN	BMI1	Polycomb complex protein BMI-1	19.4669	19.5035	19.2232	18.421	18.1336	18.3036
+	2.64729	0.721392	P35232	P35232;E7ESE2;C9JZ20;C9JW96;P35232-2;E9PCW0	PHB1_HUMAN	PHB1	Prohibitin 1	19.8652	19.7996	19.5956	19.1325	19.0526	18.9112
+	3.08228	1.33697	P35237	P35237;P50452;P50452-2;A0A2R8Y6A7;A0A2R8YD12;C9JTJ8;C9JVA8;A0A1B0GU38;H7BXK7;A0A024QZX5;A0A087X1N8	SPB6_HUMAN	SERPINB6	Serpin B6	20.1255	20.0933	20.5465	18.9143	18.8805	18.9596
+	2.01591	0.835684	P35240;P35240-2;P35240-3;P35240-8	P35240;A0A5F9ZHA0;A0A5K1VW66;P35240-2;P35240-3;P35240-4;P35240-5;P35240-6;P35240-7;P35240-8	MERL_HUMAN	NF2	Merlin	19.1746	19.2719	19.1087	18.2249	18.1316	18.6916
+	3.64912	0.938201	P35241	P35241;A0A2R8Y5S7;A0A2R8Y4H6;P35241-2;P35241-3;P35241-4;P35241-5	RADI_HUMAN	RDX	Radixin	21.3083	21.1899	21.2247	20.1844	20.4095	20.3145
+	2.31123	0.43128	P35249	P35249;C9JZI1;H7C1P0;P35249-2	RFC4_HUMAN	RFC4	Replication factor C subunit 4	24.193	24.0124	24.2632	23.7496	23.732	23.6931
+	5.08523	0.532531	P35251;P35251-2	P35251;P35251-2	RFC1_HUMAN	RFC1	Replication factor C subunit 1	24.3511	24.3996	24.4069	23.8587	23.8584	23.8429
+	1.76633	0.765305	P35269	P35269;M0R0R9;M0R0Z3	T2FA_HUMAN	GTF2F1	General transcription factor IIF subunit 1	21.8129	21.7685	21.3337	21.0181	20.9677	20.6333
+	2.62965	0.767504	P35520;P35520-2	P35520;P35520-2	CBS_HUMAN	CBS	Cystathionine beta-synthase	18.3579	18.0232	18.1006	17.3737	17.3226	17.4829
+	2.18988	0.770506	P35573	P35573;P35573-2;P35573-3	GDE_HUMAN	AGL	Glycogen debranching enzyme	20.2614	20.5402	20.4437	19.454	19.6048	19.875
+	4.85312	1.23129	P35579	P35579;P35579-2;A0A8I5KWT8	MYH9_HUMAN	MYH9	Myosin-9	28.0346	27.9975	27.9896	26.7468	26.7145	26.8665
+	2.28908	0.70602	P35580-2;P35580-4	A0A8I5KZ38;P35580-2;P35580-4	MYH10_HUMAN	MYH10	Isoform of P35580, Isoform 2 of Myosin-10	21.0605	21.3481	21.0573	20.5323	20.2836	20.5318
+	4.95595	1.2475	P35580;P35580-3	P35580;Q7Z406;M0QY43;Q7Z406-2;Q7Z406-4;Q7Z406-5;Q7Z406-6;A0A8I5KZ38;P35580-2;P35580-3;P35580-4;P35580-5	MYH10_HUMAN	MYH10	Myosin-10	24.8148	24.7475	24.8223	23.5293	23.4899	23.623
+	3.19256	0.985353	P35611;P35611-2;P35611-3;P35611-6	P35611;E7EV99;D6RJE2;D6RF25;D6RAH3;P35611-2;P35611-3;P35611-4;P35611-5;P35611-6;A0A804HL01;E7ENY0	ADDA_HUMAN	ADD1	Alpha-adducin	19.7207	19.8116	19.7249	18.7906	18.9231	18.5875
+	2.89228	1.4037	P35613;P35613-2	P35613;A0A7P0T8A7;A0A7P0TA85;P35613-2;P35613-3;P35613-4;A0A7P0TB04;R4GMX5;R4GN83;I3L192;A0A087WUV8	BASI_HUMAN	BSG	Basigin	21.6579	21.8549	21.6742	20.2802	20.6259	20.0697
+	7.05594	0.652946	P35637;P35637-2	P35637;H3BPE7;P35637-2	FUS_HUMAN	FUS	RNA-binding protein FUS	25.6793	25.684	25.6922	25.0397	25.0201	25.0368
+	4.61177	1.40393	P35658;P35658-2	P35658;P35658-2;P35658-3;P35658-4;P35658-5;A0A494C1F2;A0A8Q3WLX1;A0A8Q3SHZ4	NU214_HUMAN	NUP214	Nuclear pore complex protein Nup214	21.4781	21.646	21.5849	20.2105	20.2006	20.0859
+	2.66843	0.62165	P35659	P35659;P35659-2;H0Y993;B4DFG0;A0A494C028;A0A494C198	DEK_HUMAN	DEK	Protein DEK	23.544	23.4694	23.2871	22.8975	22.7897	22.7484
+	2.84367	0.599674	P35869	P35869;A0A2R8Y7G1;A0A1B0GVI7	AHR_HUMAN	AHR	Aryl hydrocarbon receptor	18.5756	18.7438	18.6295	18.1301	17.9365	18.0833
+	3.93506	1.05011	P35998	P35998;C9JX88;P35998-2	PRS7_HUMAN	PSMC2	26S proteasome regulatory subunit 7	20.7017	20.6161	20.7511	19.5288	19.6645	19.7252
+	2.76657	0.825969	P36542	P36542;P36542-2	ATPG_HUMAN	ATP5F1C	ATP synthase subunit gamma, mitochondrial	20.8862	20.7985	20.5744	19.8255	19.9227	20.0329
+	5.23391	1.07746	P36776;P36776-2	P36776;P36776-2;P36776-3;K7EJE8;K7EKE6;K7ER27	LONM_HUMAN	LONP1	Lon protease homolog, mitochondrial	19.9388	19.9185	19.9919	18.8232	18.911	18.8825
+	2.72984	1.2289	P36871	P36871;P36871-2;P36871-3;A0A3B3ITK7	PGM1_HUMAN	PGM1	Phosphoglucomutase-1	18.7299	18.6536	19.1624	17.6381	17.7067	17.5144
+	1.82297	0.770206	P36873;P36873-2	P36873;P36873-2;F8VYE8;F8VR82;F8W0W8;A0A087WYY5	PP1G_HUMAN	PPP1CC	Serine/threonine-protein phosphatase PP1-gamma catalytic subunit	21.1454	20.9377	21.4304	20.1549	20.5294	20.5186
+	1.60264	0.70008	P36897	P36897;B4DY26;F8VXZ5;F8VRH6;F8W1R9;P36897-2;P36897-3;A0A8V8TMH4	TGFR1_HUMAN	TGFBR1	TGF-beta receptor type-1	17.759	18.2017	18.1105	17.3629	17.5579	17.0502
+	2.38684	0.377838	P36915	P36915;A0A140T8Y2;P36915-2	GNL1_HUMAN	GNL1	Guanine nucleotide-binding protein-like 1	22.4316	22.616	22.435	22.0855	22.1116	22.152
+	3.54122	1.35875	P36957	P36957;Q86SW4;P36957-2	ODO2_HUMAN	DLST	Dihydrolipoyllysine-residue succinyltransferase component of 2-oxoglutarate dehydrogenase complex, mitochondrial	19.851	19.8769	20.0856	18.5266	18.749	18.4616
+	2.33846	0.517749	P37108	P37108;H0YLA2	SRP14_HUMAN	SRP14	Signal recognition particle 14 kDa protein	24.8179	24.8179	24.6207	24.2178	24.3491	24.1365
+	5.01007	1.16102	P37198	P37198	NUP62_HUMAN	NUP62	Nuclear pore glycoprotein p62	20.7409	20.7701	20.6813	19.5324	19.5428	19.6341
+	3.77128	1.78983	P37802	P37802;P37802-2;X6RJP6	TAGL2_HUMAN	TAGLN2	Transgelin-2	21.6256	21.3131	21.647	19.609	19.87	19.7372
+	0.937788	1.76103	P37837;P37837-2	P37837;P37837-2;F2Z393	TALDO_HUMAN	TALDO1	Transaldolase	19.7943	19.367	19.898	17.9141	19.4258	16.4364
+	2.55409	1.05301	P38117	P38117;P38117-2	ETFB_HUMAN	ETFB	Electron transfer flavoprotein subunit beta	19.6797	19.5263	19.7279	18.6796	18.7934	18.3019
+	2.51815	0.553069	P38432	P38432	COIL_HUMAN	COIL	Coilin	20.344	20.3079	20.5158	19.8665	19.9172	19.7247
+	4.10426	-2.87625	P38435	P38435;A0A8I5QJ91;A0A8I5QJA4;A0A8I5QKY1;F8WCF0;F8WB98;P38435-2;A0A8I5KT68;A0A8I5KV68;A0A8I5KXY4;A0A8I5KZ18;A0A8I5KXQ8;A0A8I5KY98	VKGC_HUMAN	GGCX	Vitamin K-dependent gamma-carboxylase	15.8467	15.4451	15.9733	18.6522	18.7415	18.5001
+	3.34138	1.00044	P38606;P38606-2	P38606;P38606-2	VATA_HUMAN	ATP6V1A	V-type proton ATPase catalytic subunit A	20.1355	20.1741	20.3582	19.202	19.1205	19.3439
+	3.32697	0.902932	P38646	P38646;D6RCD7;H0Y8K0;A0A3B3ITI4;A0A7I2YQB2;A0A7I2V2G2;A0A7I2V2S7;A0A7I2V3F7	GRP75_HUMAN	HSPA9	Stress-70 protein, mitochondrial	22.5751	22.4849	22.6874	21.553	21.7388	21.7469
+	3.02009	-0.250933	P38935	P38935;A0A6Q8PFP3;A0A6Q8PGT6;A0A6Q8PGX2;A0A6Q8PF00;F5GX64	SMBP2_HUMAN	IGHMBP2	DNA-binding protein SMUBP-2	22.5963	22.5684	22.5465	22.8257	22.7761	22.8621
+	4.14251	0.94299	P39656;P39656-3	P39656;P39656-2;P39656-3;A0A0C4DGS1	OST48_HUMAN	DDOST	Dolichyl-diphosphooligosaccharide--protein glycosyltransferase 48 kDa subunit	19.6261	19.77	19.6607	18.7896	18.6738	18.7645
+	3.7196	1.25257	P39748	P39748;I3L3E9;P39748-2	FEN1_HUMAN	FEN1	Flap endonuclease 1	23.4042	23.1635	23.1105	21.9206	21.9789	22.0209
+	1.7529	2.64029	P40121	P40121;P40121-2	CAPG_HUMAN	CAPG	Macrophage-capping protein	19.6788	19.5997	19.6535	16.8208	18.2588	15.9315
+	2.56031	1.22321	P40222	P40222	TXLNA_HUMAN	TXLNA	Alpha-taxilin	21.5001	21.4382	21.2403	20.2742	20.3946	19.8401
+	3.30894	0.949865	P40227	P40227;P40227-2	TCPZ_HUMAN	CCT6A	T-complex protein 1 subunit zeta	21.9588	21.8986	22.1197	20.9221	21.1388	21.0667
+	2.80288	0.76527	P40616;P40616-2	P40616;P40616-2;B4DZG7;F8VYN9	ARL1_HUMAN	ARL1	ADP-ribosylation factor-like protein 1	19.5599	19.5374	19.7435	18.9212	18.6966	18.9273
+	1.61261	0.325882	P40692	P40692;P40692-3;H0Y818;H0Y5L7;A0A669KBK2;A0A669KBB4;A0A669KAW3;A0A669KB03	MLH1_HUMAN	MLH1	DNA mismatch repair protein Mlh1	19.2404	19.4814	19.5251	19.1235	19.0365	19.1092
+	2.86121	1.03503	P40818	P40818;A0A075B720;H0YNL5;H0YM47;H0YLH2;H0YKV1	UBP8_HUMAN	USP8	Ubiquitin carboxyl-terminal hydrolase 8	20.1554	20.1305	19.9632	18.9283	18.9358	19.2799
+	3.24932	1.24552	P40925;P40925-3	P40925;C9JRL4;C9JF79;A0A5K1VW95;B9A041;P40925-2;P40925-3	MDHC_HUMAN	MDH1	Malate dehydrogenase, cytoplasmic	20.8473	20.7574	21.1051	19.5554	19.7875	19.6304
+	2.48756	1.19561	P40926	P40926;G3XAL0;P40926-2	MDHM_HUMAN	MDH2	Malate dehydrogenase, mitochondrial	19.9	19.4701	19.8381	18.479	18.7979	18.3445
+	4.22976	0.34428	P40937	P40937;C9JH72;P40937-2;F5H304;F5H0U6	RFC5_HUMAN	RFC5	Replication factor C subunit 5	23.9904	24.0202	24.0381	23.6891	23.6453	23.6814
+	2.94613	0.384357	P40938	P40938;P40938-2	RFC3_HUMAN	RFC3	Replication factor C subunit 3	23.4818	23.5932	23.445	23.1227	23.1016	23.1426
+	3.4461	0.610669	P40939	P40939;A0A2R8Y4F5;H0YFD6	ECHA_HUMAN	HADHA	Trifunctional enzyme subunit alpha, mitochondrial	21.0808	21.1959	21.2288	20.4988	20.5728	20.6019
+	2.55234	0.519243	P41091	Q2VIR3;P41091;Q2VIR3-2	IF2G_HUMAN	EIF2S3	Eukaryotic translation initiation factor 2 subunit 3	24.1485	23.9738	23.9116	23.4595	23.5627	23.4539
+	1.70945	1.339	P41134;P41134-2	P41134;P41134-2	ID1_HUMAN	ID1	DNA-binding protein inhibitor ID-1	18.1278	17.889	18.5783	17.1935	16.2785	17.1061
+	1.82226	0.333869	P41214	P41214;Q5SY38	EIF2D_HUMAN	EIF2D	Eukaryotic translation initiation factor 2D	21.1757	21.1614	21.2405	20.8442	20.7313	21.0005
+	1.18418	1.78044	P41223	P41223;P41223-2	BUD31_HUMAN	BUD31	Protein BUD31 homolog	17.5876	17.8219	17.92	17.3908	15.4026	15.1948
+	1.39502	0.367914	P41227	P41227;A8MWP7;C9JW55;F8W808;C9JN83;P41227-2	NAA10_HUMAN	NAA10	N-alpha-acetyltransferase 10	20.8816	20.8237	20.5522	20.338	20.2946	20.5211
+	1.25158	0.433846	P41250;P41250-2	P41250;A0A6Q8PFZ6;A0A6Q8PGI6;A0A6Q8PGA8;P41250-2;A0A6Q8PGZ8;A0A6Q8PGW4;A0A6Q8PHH9;A0A6Q8PHI7;H7C443	GARS_HUMAN	GARS1	Glycine--tRNA ligase	20.1134	19.7097	20.1543	19.4255	19.7012	19.5492
+	4.04568	1.01088	P41252	P41252;J3KR24;A0A804HHW9;A0A804HJ36;A0A804HIV9;A0A804HIG2;A0A0A0MSX9;A0A804HK69;A0A804HJN6;A0A804HKU1;A0A804HL54	SYIC_HUMAN	IARS1	Isoleucine--tRNA ligase, cytoplasmic	24.1557	24.13	23.9783	23.1365	23.0612	23.0336
+	1.77509	1.79252	P41743	P41743	KPCI_HUMAN	PRKCI	Protein kinase C iota type	18.0569	18.178	18.9582	16.941	15.8958	16.9788
+	1.918	0.704628	P42025	P42025	ACTY_HUMAN	ACTR1B	Beta-centractin	18.9327	19.3916	19.2594	18.6435	18.4833	18.3431
+	4.48244	1.00074	P42166	P42166;H0YJH7;P42167-2;P42167-3;G5E972;P42167	LAP2A_HUMAN	TMPO	Lamina-associated polypeptide 2, isoform alpha	24.404	24.3988	24.5302	23.4647	23.4681	23.398
+	2.56027	0.889993	P42167	H0YJH7;P42167-2;G5E972;P42167	LAP2B_HUMAN	TMPO	Isoform of P42166, Lamina-associated polypeptide 2, isoforms beta/gamma	20.0282	19.8659	19.6431	18.9833	19.0718	18.8122
+	3.18302	0.319768	P42285	P42285	MTREX_HUMAN	MTREX	Exosome RNA helicase MTR4	21.1867	21.1438	21.1976	20.8312	20.8236	20.914
+	3.40404	0.870944	P42356	P42356	PI4KA_HUMAN	PI4KA	Phosphatidylinositol 4-kinase alpha	20.6224	20.7743	20.8086	19.7539	19.925	19.9135
+	0.968653	1.49397	P42568	P42568;P42568-2	AF9_HUMAN	MLLT3	Protein AF-9	18.9223	18.27	18.2293	17.6114	15.608	17.7203
+	3.46623	0.587699	P42694	P42694;A0A075B6R3;P42694-2;J3QRR8;J3QS41	HELZ_HUMAN	HELZ	Probable helicase with zinc finger domain	22.1437	22.2664	22.267	21.6716	21.575	21.6675
+	2.02633	0.531506	P42695	P42695;G3V1A9;E9PLE0;A0A8I5KT00	CNDD3_HUMAN	NCAPD3	Condensin-2 complex subunit D3	19.2585	19.6284	19.4211	18.8302	18.9514	18.932
+	5.24522	0.890509	P42696	P42696;A2A2V2	RBM34_HUMAN	RBM34	RNA-binding protein 34	23.356	23.3778	23.3773	22.4997	22.5132	22.4267
+	3.98968	1.08662	P42704	P42704;C9JCA9;A0A804HI14;A0A804HHY9;A0A804HI40;A0A804HIQ7;A0A804HIN4;A0A804HIV5;A0A804HIG4;A0A804HLG8;A0A804HK02;A0A804HJZ1;A0A804HJH8;A0A804HKR3;A0A804HKR5;A0A804HL40;A0A804HKX0;A0A804HKJ0;A0A804HKI2;B8ZZ38;A0A0C4DG06	LPPRC_HUMAN	LRPPRC	Leucine-rich PPR motif-containing protein, mitochondrial	21.3927	21.4931	21.4449	20.2417	20.366	20.4631
+	3.357	1.35149	P42771;P42771-4	P42771;K7ENC6;K7ES20;P42771-2;P42771-4;J3QRG6	CDN2A_HUMAN	CDKN2A	Cyclin-dependent kinase inhibitor 2A	18.7408	18.3984	18.7489	17.3368	17.3236	17.1732
+	0.86894	-2.94704	P42858	P42858;A0A7P0TA78;A0A7P0TAC5;A0A7P0TAN5	HD_HUMAN	HTT	Huntingtin	16.1656	16.7962	19.5095	21.2653	18.0741	21.973
+	3.34097	1.26247	P43121	P43121;P43121-2	MUC18_HUMAN	MCAM	Cell surface glycoprotein MUC18	21.3165	21.4124	21.5166	19.9436	20.2694	20.245
+	2.99908	0.231245	P43243	P43243;A8MXP9;A0A0R4J2E8;D6REM6;D6RIA2;D6RBI2;D6RBK5;P43243-2;D6RE02;D6R991;H0Y8T4;B3KM87	MATR3_HUMAN	MATR3	Matrin-3	23.3804	23.3372	23.3257	23.1002	23.1583	23.091
+	2.66321	0.6363	P43246	P43246;A0A2R8Y6P0;A0A2R8YG02;A0A2R8YFH0;P43246-2;E9PHA6	MSH2_HUMAN	MSH2	DNA mismatch repair protein Msh2	21.0661	21.1729	21.0464	20.4259	20.3367	20.6139
+	2.4447	1.09841	P43353	P43353;P43353-2;A0A087X2D4	AL3B1_HUMAN	ALDH3B1	Aldehyde dehydrogenase family 3 member B1	20.0373	20.029	20.2382	18.8723	18.8049	19.3321
+	2.35592	2.30145	P43487;P43487-2	P43487;F6WQW2;P43487-2;C9JJ34;C9JDM3	RANG_HUMAN	RANBP1	Ran-specific GTPase-activating protein	19.6695	19.5208	19.7691	16.5861	17.868	17.601
+	1.14801	0.969477	P43490	P43490;A0A7P0T9I9;A0A7P0T8D2;A0A7P0T8L3;A0A7P0T941;A0A7P0T931;A0A7P0T973;A0A7P0T862;A0A7P0T895;B7Z8W6;A0A7P0TBB7;A0A7P0TA73;A0A7P0TAS5;A0A7P0Z466;A0A0C4DFS8	NAMPT_HUMAN	NAMPT	Nicotinamide phosphoribosyltransferase	19.2808	19.5532	19.5698	17.7318	18.804	18.9595
+	3.63766	1.05162	P43686	P43686;P43686-2	PRS6B_HUMAN	PSMC4	26S proteasome regulatory subunit 6B	20.38	20.4281	20.3396	19.188	19.4633	19.3415
+	4.40469	0.756362	P45973	P45973	CBX5_HUMAN	CBX5	Chromobox protein homolog 5	21.1734	21.2195	21.2159	20.4858	20.3757	20.4781
+	4.14849	0.910412	P45974;P45974-2	P45974;P45974-2	UBP5_HUMAN	USP5	Ubiquitin carboxyl-terminal hydrolase 5	20.3848	20.3921	20.4225	19.4177	19.4589	19.5916
+	4.15166	0.89597	P46013	P46013;P46013-2	KI67_HUMAN	MKI67	Proliferation marker protein Ki-67	23.8713	23.9028	23.866	22.9445	23.0862	22.9215
+	3.28087	0.773842	P46060	P46060	RAGP1_HUMAN	RANGAP1	Ran GTPase-activating protein 1	19.8957	19.6875	19.9162	19.0309	19.1	19.047
+	3.79534	0.657869	P46063	P46063;F8WD97;F8WA66	RECQ1_HUMAN	RECQL	ATP-dependent DNA helicase Q1	20.4446	20.4491	20.4099	19.6871	19.8028	19.8401
+	4.36054	0.835997	P46087;P46087-4	P46087;P46087-2;P46087-3;P46087-4	NOP2_HUMAN	NOP2	Probable 28S rRNA (cytosine(4447)-C(5))-methyltransferase	24.8675	24.8992	24.9515	24.0344	24.1422	24.0336
+	2.29306	0.738574	P46734	P46734;P46734-2;P46734-3	MP2K3_HUMAN	MAP2K3	Dual specificity mitogen-activated protein kinase kinase 3	19.6921	19.3238	19.7147	18.8553	18.7635	18.8961
+	2.19564	0.396225	P46776	P46776;E9PLL6	RL27A_HUMAN	RPL27A	60S ribosomal protein L27a	30.9484	30.9296	30.91	30.5047	30.6747	30.42
+	1.61778	-0.34219	P46782	P46782;M0R0R2;M0R0F0	RS5_HUMAN	RPS5	40S ribosomal protein S5	28.4104	28.5777	28.7193	28.9431	28.8368	28.9539
+	4.01737	1.08629	P46940	P46940;H0YLE8	IQGA1_HUMAN	IQGAP1	Ras GTPase-activating-like protein IQGAP1	23.9836	23.9619	23.8031	22.8585	22.8792	22.7521
+	3.29788	0.777136	P46977	P46977;P46977-2	STT3A_HUMAN	STT3A	Dolichyl-diphosphooligosaccharide--protein glycosyltransferase subunit STT3A	19.8578	19.9035	20.0858	19.2296	19.1511	19.135
+	4.37801	1.26527	P47755	P47755;P47755-2;C9JUG7;F8W9N7	CAZA2_HUMAN	CAPZA2	F-actin-capping protein subunit alpha-2	23.6251	23.5453	23.7623	22.3601	22.3662	22.4106
+	3.08655	0.814498	P47756	P47756;P47756-1;A0A6I8PRV6;B1AK85;B1AK87;B1AK88	CAPZB_HUMAN	CAPZB	F-actin-capping protein subunit beta	24.8299	24.683	24.8368	23.9644	23.842	24.0999
+	4.12838	0.790804	P47897	P47897;C9J165;A0A0U1RQM8;A0A0U1RQT0;A0A0U1RQE9;A0A0U1RRI9;A0A1B0GVU9;P47897-2	SYQ_HUMAN	QARS1	Glutamine--tRNA ligase	22.6535	22.5852	22.496	21.7663	21.7873	21.8086
+	1.55293	0.384081	P47914	P47914;A0A3B3ITT5	RL29_HUMAN	RPL29	60S ribosomal protein L29	29.7688	29.8635	29.7232	29.313	29.6124	29.2779
+	3.44736	1.75452	P48059-2	P48059;P48059-2;P48059-3;P48059-4;P48059-5;A0A0J9YXC7;A0A0M3HER1;A0A8Q3WLX8;A0A8Q3WLN4;A0A8Q3WKJ2;A0A8Q3WKI3;A0A8Q3WKK6;A0A8Q3WKP0	LIMS1_HUMAN	LIMS1	Isoform of P48059, Isoform 2 of LIM and senescent cell antigen-like-containing domain protein 1	19.8561	19.9276	19.7827	17.934	17.9678	18.4011
+	2.12201	1.24222	P48147	P48147;A0A499FJL1	PPCE_HUMAN	PREP	Prolyl endopeptidase	18.8983	18.7636	18.7278	17.1275	17.9709	17.5646
+	2.69008	1.18746	P48382;P48382-2	P48382;F6R6G4;P48382-2;F8W689;F6S3S0;A0A0A0MSM9;A0A0A0MSQ2;A0A0A0MT34;F6X9D6;F6UE82	RFX5_HUMAN	RFX5	DNA-binding protein RFX5	18.9939	19.0898	19.1566	18.105	17.5801	17.9929
+	3.45183	0.349824	P48426	P48426;P48426-2	PI42A_HUMAN	PIP4K2A	Phosphatidylinositol 5-phosphate 4-kinase type-2 alpha	19.4644	19.4967	19.4922	19.1924	19.0966	19.1148
+	2.67488	0.768751	P48444	P48444;B0YIW6	COPD_HUMAN	ARCN1	Coatomer subunit delta	20.4825	20.4624	20.7713	19.8628	19.8279	19.7192
+	4.2734	3.1445	P48507	P48507	GSH0_HUMAN	GCLM	Glutamate--cysteine ligase regulatory subunit	18.9932	19.2149	18.8759	16.1654	15.7354	15.7497
+	2.55497	0.743625	P48556	P48556;K7EJC1;R4GMR5;A0A8V8TR48;A0A8V8TPK1;A0A8V8TQ44;K7EJR3;K7ERW6	PSMD8_HUMAN	PSMD8	26S proteasome non-ATPase regulatory subunit 8	20.1262	20.3365	20.1764	19.3012	19.4812	19.6258
+	3.44153	1.06414	P48643	P48643;P48643-2;E9PCA1;B7ZAR1;E7ENZ3	TCPE_HUMAN	CCT5	T-complex protein 1 subunit epsilon	22.3904	22.2833	22.4148	21.215	21.4706	21.2104
+	3.07161	0.517276	P48729	P48729;Q8N752;E7ETM0;P48729-2;P48729-3;D6REM4;H0Y9X2;A0A590UJ43;A0A5F9W493;U3KPX3;U3KQK7	KC1A_HUMAN	CSNK1A1	Casein kinase I isoform alpha	20.8017	20.6632	20.7504	20.1641	20.1988	20.3006
+	3.07553	0.652164	P49005	P49005;C9IZD2;C9JLE1;H7C1B3;A0A8V8TPA1;A0A8V8TPA6;A0A8V8TPB6;A0A8V8TNY7;A0A8V8TMJ0;A0A8V8TMJ5;A0A8V8TMK0;A0A8V8TN07;A0A087WWF6	DPOD2_HUMAN	POLD2	DNA polymerase delta subunit 2	19.6672	19.7917	19.6079	18.9672	19.1289	19.0142
+	2.28786	0.900461	P49006	P49006	MRP_HUMAN	MARCKSL1	MARCKS-related protein	20.2262	20.3806	20.5005	19.201	19.523	19.6819
+	4.2773	1.39892	P49184	P49184	DNSL1_HUMAN	DNASE1L1	Deoxyribonuclease-1-like 1	19.8803	19.9988	19.8839	18.3924	18.5664	18.6075
+	2.78414	1.12434	P49189	P49189;P49189-2;P49189-3	AL9A1_HUMAN	ALDH9A1	4-trimethylaminobutyraldehyde dehydrogenase	19.3139	19.4293	19.5911	18.5474	18.2986	18.1153
+	1.49862	0.601043	P49207	P49207	RL34_HUMAN	RPL34	60S ribosomal protein L34	29.4601	29.4928	29.5024	28.8352	29.2264	28.5906
+	3.92839	1.65945	P49321	P49321;P49321-3;P49321-4;E9PPR5	NASP_HUMAN	NASP	Nuclear autoantigenic sperm protein	20.3177	20.3719	20.3449	18.5739	18.9058	18.5764
+	3.81416	1.09498	P49327	P49327;A0A0U1RQF0	FAS_HUMAN	FASN	Fatty acid synthase	22.2955	22.4176	22.5098	21.2185	21.3767	21.3427
+	2.48744	0.880479	P49368	P49368;B4DUR8;P49368-2;Q5SZW8;Q5SZX6;E9PRC8;E9PQ35	TCPG_HUMAN	CCT3	T-complex protein 1 subunit gamma	22.1978	22.1015	22.467	21.2006	21.4646	21.4596
+	1.77719	0.575672	P49406	P49406;H7C2J0;S4R3W9	RM19_HUMAN	MRPL19	39S ribosomal protein L19, mitochondrial	19.8181	19.8148	19.4149	19.0137	19.2103	19.0968
+	3.35321	0.979696	P49411	P49411	EFTU_HUMAN	TUFM	Elongation factor Tu, mitochondrial	21.3089	21.1076	21.3349	20.1858	20.381	20.2455
+	4.11369	0.765991	P49454	P49454	CENPF_HUMAN	CENPF	Centromere protein F	20.4518	20.4836	20.5161	19.7278	19.7855	19.6403
+	2.85916	1.02501	P49585	P49585;C9J2E1;C9J050;C9JEJ2;H7BZN1;H7C1T3	PCY1A_HUMAN	PCYT1A	Choline-phosphate cytidylyltransferase A	20.5435	20.6525	20.2406	19.53	19.3931	19.4385
+	2.57461	1.03934	P49588	P49588;A0A6Q8PFK3;A0A6Q8PFY2;A0A6Q8PGN5;A0A6Q8PGE8;A0A6Q8PGB5;A0A6Q8PGR9;A0A6Q8PH44;A0A6Q8PF33;A0A6Q8PHJ2;H3BPK7;P49588-2	SYAC_HUMAN	AARS1	Alanine--tRNA ligase, cytoplasmic	19.8979	19.9896	20.2036	18.759	19.1988	19.0153
+	4.44143	1.29947	P49589-3	P49589;B4DKY1;P49589-2;P49589-3	SYCC_HUMAN	CARS1	Isoform of P49589, Isoform 3 of Cysteine--tRNA ligase, cytoplasmic	20.78	20.7545	20.6424	19.3532	19.4062	19.5191
+	3.28644	0.935434	P49591	P49591;Q5T5C7	SYSC_HUMAN	SARS1	Serine--tRNA ligase, cytoplasmic	20.2629	19.9758	20.0048	19.1403	19.1368	19.1602
+	1.62113	0.914599	P49642	P49642;F8VSB2;F8VNY2;A0A5F9ZHB6	PRI1_HUMAN	PRIM1	DNA primase small subunit	19.4469	19.8616	19.2757	18.8862	18.7078	18.2464
+	2.84092	0.855824	P49643	P49643;A0A5F9ZHR0;A0A5F9ZHU7;P49643-2	PRI2_HUMAN	PRIM2	DNA primase large subunit	19.3455	19.564	19.6434	18.6489	18.5587	18.7778
+	1.85078	0.519635	P49720	P49720;A0A087WUL2;A0A087WY10;A0A087WXQ8	PSB3_HUMAN	PSMB3	Proteasome subunit beta type-3	19.0649	19.4554	19.3041	18.7684	18.837	18.6601
+	3.69069	1.09988	P49721	P49721;A0A087WVV1	PSB2_HUMAN	PSMB2	Proteasome subunit beta type-2	20.3932	20.5993	20.5654	19.4663	19.3082	19.4838
+	2.44041	0.517818	P49736	P49736;H0Y8E6	MCM2_HUMAN	MCM2	DNA replication licensing factor MCM2	20.781	20.5775	20.7568	20.136	20.1281	20.2977
+	2.16205	0.926238	P49748	P49748;P49748-2;P49748-3	ACADV_HUMAN	ACADVL	Very long-chain specific acyl-CoA dehydrogenase, mitochondrial	19.6753	19.772	19.9623	18.561	18.9901	19.0798
+	3.7645	0.643588	P49750	P49750;H0YIQ2;P49750-1;P49750-3	YLPM1_HUMAN	YLPM1	YLP motif-containing protein 1	21.4678	21.5148	21.5386	20.8262	20.9487	20.8155
+	1.50448	2.39692	P49755	P49755	TMEDA_HUMAN	TMED10	Transmembrane emp24 domain-containing protein 10	17.8328	18.0822	18.6538	16.6288	14.4115	16.3377
+	2.27765	0.358442	P49756	P49756	RBM25_HUMAN	RBM25	RNA-binding protein 25	22.7131	22.8778	22.6749	22.4221	22.408	22.3604
+	2.5656	1.0076	P49757;P49757-3	P49757;G3V4S6;G3V3R1;G3V433;P49757-2;P49757-3;P49757-4;P49757-5;P49757-6;P49757-7;P49757-8	NUMB_HUMAN	NUMB	Protein numb homolog	20.0791	20.1741	19.9057	19.1915	19.16	18.7846
+	1.69166	0.426826	P49760;P49760-3	P49760;P49760-3;B1AVT0	CLK2_HUMAN	CLK2	Dual specificity protein kinase CLK2	19.919	20.0306	19.7319	19.4878	19.3292	19.584
+	2.38825	0.43516	P49761;P49761-1	P49761;P49761-1;H3BUL5;H3BVF8;H3BQG1	CLK3_HUMAN	CLK3	Dual specificity protein kinase CLK3	20.9638	21.0428	20.8983	20.5203	20.4353	20.6439
+	2.30682	-0.431859	P49770	P49770;H0YJJ8;G3V5E5	EI2BB_HUMAN	EIF2B2	Translation initiation factor eIF-2B subunit beta	19.4497	19.3824	19.5772	19.9855	19.9113	19.8081
+	3.29229	3.44274	P49773	P49773;A0A6Q8PGQ8;D6REP8;D6RE99;D6RC06;H0YC49;D6RD60	HINT1_HUMAN	HINT1	Adenosine 5'-monophosphoramidase HINT1	19.4411	18.8679	19.183	15.3633	15.5006	16.2999
+	2.6315	0.888025	P49790	P49790;P49790-2;P49790-3	NU153_HUMAN	NUP153	Nuclear pore complex protein Nup153	19.6705	19.9627	19.7349	18.8517	19.0828	18.7695
+	4.17699	0.734519	P49792	A6NKT7;O14715;Q7Z3J3;P0DJD0;P49792;P0DJD1;Q99666;J3KNE0;J3KQ37;A0A286YES2;F8VYC4;F8W705;Q99666-2;A0A8V8TL79;A0A8V8TLA0;A0A8Q3SIN4;A0A8Q3SII4;A0A8Q3SII5	RBP2_HUMAN	RANBP2	E3 SUMO-protein ligase RanBP2	20.0799	20.071	20.1913	19.394	19.4005	19.3441
+	2.65423	1.15842	P49795	P49795	RGS19_HUMAN	RGS19	Regulator of G-protein signaling 19	20.803	20.9825	21.0041	19.8377	19.9975	19.4791
+	2.96453	1.63538	P49902;P49902-2	P49902;A0A6Q8PHP0;A0A6Q8PHB5;P49902-2	5NTC_HUMAN	NT5C2	Cytosolic purine 5'-nucleotidase	17.0285	17.0147	17.4297	15.6964	15.6213	15.249
+	1.7297	0.810062	P49915	P49915;P49915-2	GUAA_HUMAN	GMPS	GMP synthase [glutamine-hydrolyzing]	19.7148	19.5095	19.5753	18.3945	19.0654	18.9094
+	2.26617	0.216977	P49916-3	P49916;P49916-2;P49916-3;P49916-4;K7ENR9;K7ERZ5	DNLI3_HUMAN	LIG3	Isoform of P49916, Isoform 3 of DNA ligase 3	21.1469	21.2116	21.0885	20.9099	20.9196	20.9666
+	1.15233	0.47032	P49959;P49959-3	P49959;F8W7U8;P49959-2;P49959-3	MRE11_HUMAN	MRE11	Double-strand break repair protein MRE11	18.8691	18.9932	19.253	18.5895	18.2895	18.8254
+	3.23345	1.23301	P50148	P50148;B1AM21	GNAQ_HUMAN	GNAQ	Guanine nucleotide-binding protein G(q) subunit alpha	20.9618	21.0476	21.1126	19.5745	19.9179	19.9305
+	3.10808	5.53893	P50238	P50238	CRIP1_HUMAN	CRIP1	Cysteine-rich protein 1	20.3621	20.2902	20.379	14.0885	14.3244	16.0017
+	2.34568	0.906677	P50395	P50395;P50395-2	GDIB_HUMAN	GDI2	Rab GDP dissociation inhibitor beta	20.6714	20.265	20.3839	19.3341	19.6636	19.6026
+	2.95492	0.607278	P50402	P50402;A0A804HIV7;A0A804HLA2	EMD_HUMAN	EMD	Emerin	22.1134	22.1723	22.0498	21.4974	21.6175	21.3987
+	3.94018	0.589151	P50416	P50416;P50416-2	CPT1A_HUMAN	CPT1A	Carnitine O-palmitoyltransferase 1, liver isoform	20.9271	20.9823	20.8631	20.3727	20.3149	20.3176
+	2.90331	0.846472	P50454	P50454;E9PPV6;E9PR70;E9PJH8;E9PKH2	SERPH_HUMAN	SERPINH1	Serpin H1	20.6471	20.4746	20.3866	19.5488	19.6302	19.7898
+	4.77762	1.4763	P50502	Q8IZP2;P50502;F6VDH7;H7C3I1	F10A1_HUMAN	ST13	Hsc70-interacting protein	20.8095	20.6842	20.8342	19.2981	19.3675	19.2334
+	1.48554	0.848387	P50552	P50552;K7ENL7;K7ENR7	VASP_HUMAN	VASP	Vasodilator-stimulated phosphoprotein	19.7133	19.7038	20.2624	18.6711	19.177	19.2863
+	1.13664	1.78299	P50570;P50570-5	Q9UQ16;P50570;H0YBC6;Q9UQ16-2;Q9UQ16-3;Q9UQ16-4;Q9UQ16-5;A0A8I5KXV5;P50570-2;P50570-3;P50570-4;P50570-5;E5RIK2;E5RHK8	DYN2_HUMAN	DNM2	Dynamin-2	18.6377	18.9834	19.2851	17.6391	18.1311	15.7871
+	3.90765	1.00938	P50579	P50579;F8VZX9;F8VY03;F8VQZ7;F8VRR3;G3V1U3;P50579-2;P50579-3	MAP2_HUMAN	METAP2	Methionine aminopeptidase 2	21.8471	21.7644	21.7731	20.7246	20.7198	20.9121
+	1.31791	0.549348	P50613	P50613;D6REC6;D6RAD4;D6R9G1	CDK7_HUMAN	CDK7	Cyclin-dependent kinase 7	18.1949	18.1556	17.6413	17.3359	17.4067	17.6011
+	1.49049	1.43832	P50748	P50748;P50748-2	KNTC1_HUMAN	KNTC1	Kinetochore-associated protein 1	20.2704	18.9876	18.9919	17.7737	17.9359	18.2254
+	1.20327	0.79108	P50851	P50851;P50851-2;A0A494BZW2;E9PEM5;A0A494C1L5;A0A494C0R9	LRBA_HUMAN	LRBA	Lipopolysaccharide-responsive and beige-like anchor protein	18.9612	18.5958	18.7851	17.4221	18.3804	18.1663
+	2.79841	3.53857	P50895	P50895;A0A087WXM8	BCAM_HUMAN	BCAM	Basal cell adhesion molecule	18.4814	18.6022	18.6318	15.866	14.9635	14.2702
+	3.17082	1.05836	P50990	P50990;P50990-2;P50990-3;H7C4C8	TCPQ_HUMAN	CCT8	T-complex protein 1 subunit theta	22.7257	22.6772	22.9559	21.6512	21.868	21.6645
+	3.16745	1.10463	P50991	P50991;P50991-2	TCPD_HUMAN	CCT4	T-complex protein 1 subunit delta	22.2374	22.1504	22.4843	21.0756	21.2764	21.2062
+	1.25473	0.646569	P50995;P50995-2	P50995;P50995-2	ANX11_HUMAN	ANXA11	Annexin A11	18.7036	18.7699	18.6608	18.5344	17.7456	17.9146
+	0.833964	2.56476	P51003	P51003;Q9NRJ5;P51003-2;H0YJ00;G3XAH6	PAPOA_HUMAN	PAPOLA	Poly(A) polymerase alpha	19.0932	19.5125	18.9521	15.0515	19.4483	15.3637
+	4.25453	1.04934	P51114	P51114;E7EU85;B4DXZ6;E9PFF5;A0A8V8TNP6;A0A8V8TMQ1;P51114-2;P51114-3	FXR1_HUMAN	FXR1	RNA-binding protein FXR1	24.9188	24.9288	24.8833	23.7682	23.8512	23.9634
+	1.03602	0.612292	P51114-2	E7EU85;E9PFF5;A0A8V8TNP6;P51114-2	FXR1_HUMAN	FXR1	Isoform of P51114, Isoform 2 of RNA-binding protein FXR1	18.1951	18.2399	18.2474	18.1674	17.3789	17.2992
+	5.38901	1.00236	P51116	P51116	FXR2_HUMAN	FXR2	RNA-binding protein FXR2	26.717	26.695	26.7683	25.7007	25.7619	25.7107
+	2.90738	0.928725	P51148;P51148-2	P20339;P61020;P51148;P51148-2;F8VVK3;F8VVZ0;F8VUA5;P20339-2;P61020-2;K7ENY4;K7ERI8;K7ERQ8	RAB5C_HUMAN	RAB5C	Ras-related protein Rab-5C	20.2395	20.5119	20.4616	19.332	19.4968	19.5979
+	2.76058	0.900869	P51149	P51149;C9IZZ0;C9J7D1;C9J8S3;C9J4V0;C9J4S4;C9J592;A0A6Q8PG52;A0A6Q8PH84	RAB7A_HUMAN	RAB7A	Ras-related protein Rab-7a	20.0837	20.4367	20.2023	19.4458	19.344	19.2304
+	1.09058	2.29045	P51151	P51151;Q9NP90;A0A1B0GUI0	RAB9A_HUMAN	RAB9A	Ras-related protein Rab-9A	19.0542	19.0621	19.2238	17.7619	17.855	14.8519
+	1.44965	1.02472	P51153	O95716;P51153;P20337;Q96E17;Q92930;P20336;P61006;H0YMN7;H0YNE9;M0R257;P61006-2	RAB13_HUMAN	RAB13	Ras-related protein Rab-13	19.2908	19.9949	20.258	19.1349	18.6917	18.643
+	2.3063	-0.76264	P51397	P51397	DAP1_HUMAN	DAP	Death-associated protein 1	22.7479	22.6628	22.4302	23.3807	23.5422	23.2059
+	2.28045	0.303939	P51531;P51531-2	P51531;F6VDE0;A0A0U1RQZ9;P51531-2	SMCA2_HUMAN	SMARCA2	Probable global transcription activator SNF2L2	19.3477	19.3458	19.4482	19.1627	19.0427	19.0244
+	2.84279	0.54369	P51532;P51532-2;P51532-3;P51532-4;P51532-5	P51531;P51532;F6VDE0;A0A2R8Y7Y7;A0A2R8Y7S2;A0A2R8Y7F3;A0A0U1RQZ9;A0A2R8Y6V2;A0A2R8Y6N0;P51531-2;P51532-2;P51532-3;P51532-4;P51532-5;A0A2R8Y440;A0A2R8Y4P4;A0A2R8Y4R6;A0A2R8Y526;A0A2R8Y4C5;A0A2R8YGP5;A0A2R8YDA1;A0A2R8YCY3;A0A2R8YGG3;A0A2R8YFV8;A0A2R8YG32;A0A2R8YF80;A0A2R8YF58;Q9HBD4	SMCA4_HUMAN	SMARCA4	Transcription activator BRG1	21.5102	21.5117	21.3403	20.9324	20.9657	20.8331
+	1.44048	0.692706	P51571	P51571	SSRD_HUMAN	SSR4	Translocon-associated protein subunit delta	19.1568	19.2452	19.2999	18.7532	18.7685	18.1021
+	1.61067	0.754909	P51572;P51572-2	P51572;C9J0M4;A0A2R8Y5M6;P51572-2;C9JSP1;C9JQ75;C9JMD7	BAP31_HUMAN	BCAP31	B-cell receptor-associated protein 31	20.0054	20.2553	20.5796	19.5316	19.7571	19.2869
+	1.84759	0.560441	P51608-2	P51608;B5MCB4;A0A0D9SFX7;P51608-2	MECP2_HUMAN	MECP2	Isoform of P51608, Isoform B of Methyl-CpG-binding protein 2	19.8601	19.9627	19.9363	19.4361	19.5383	19.1033
+	1.85458	0.834106	P51610;P51610-2;P51610-4	P51610;A6NEM2;P51610-2;P51610-4	HCFC1_HUMAN	HCFC1	Host cell factor 1	18.7933	18.7555	19.2962	18.1863	17.9209	18.2354
+	3.08328	1.0372	P51648;P51648-2	P51648;J3KTD9;A0A5F9ZHN9;A0A5F9ZHP6;A0A5F9ZGX4;A0A5K1VW72;I3L4G6;J3QQV9;P51648-2	AL3A2_HUMAN	ALDH3A2	Aldehyde dehydrogenase family 3 member A2	20.149	20.1971	20.4587	19.3501	19.1401	19.2029
+	3.36174	0.894036	P51659	P51659;E7EPL9;E7ER27;A0A2R8YDT8;A0A2R8YD50;A0A2R8YF45;A0A2R8YEG2;A0A804HIR1;A0A804HLJ0;A0A804HK65;A0A804HKT2;A0A804HKU2	DHB4_HUMAN	HSD17B4	Peroxisomal multifunctional enzyme type 2	19.799	19.7438	19.9026	19.0598	18.8601	18.8433
+	3.95095	0.980054	P51665	P51665;H3BTM8;H3BQV2;H3BNT7	PSMD7_HUMAN	PSMD7	26S proteasome non-ATPase regulatory subunit 7	20.3604	20.4054	20.3143	19.2655	19.4101	19.4643
+	2.52465	0.287924	P51801	P51801;A0A804HI21;A0A804HJU7;A0A804HJB2	CLCKB_HUMAN	CLCNKB	Chloride channel protein ClC-Kb	18.381	18.2962	18.2707	18.0399	17.9716	18.0726
+	1.88726	-0.595215	P51812	Q15349;Q15418;P51812;Q9UK32;A0A2R8Y603;B7ZB17;Q15349-2;Q15349-3;Q5SVM6;B7Z3B5;B4DG22;Q9UK32-2;Q15418-2;Q15418-3;Q15418-4;B1AXG1;E9PGT3;F2Z2J1	KS6A3_HUMAN	RPS6KA3	Ribosomal protein S6 kinase alpha-3	18.7119	18.6609	18.8358	19.1823	19.2228	19.5892
+	1.74119	1.13741	P51825-2;P51825-3	P51825;P51825-2;P51825-3;A0A669KBI3;F5GXF9	AFF1_HUMAN	AFF1	Isoform of P51825, Isoform 2 of AF4/FMR2 family member 1	18.9578	18.814	18.8183	18.0278	18.0057	17.1444
+	3.31606	1.51982	P51858	P51858;P51858-2;P51858-3	HDGF_HUMAN	HDGF	Hepatoma-derived growth factor	21.2585	21.0593	21.3807	19.639	19.9335	19.5665
+	1.80726	-2.08104	P51946	P51946;A0A2R8YEM2;D6RG18;D6RHI7	CCNH_HUMAN	CCNH	Cyclin-H	15.5181	15.5185	13.9867	16.969	17.0964	17.201
+	3.02126	1.3216	P52209;P52209-2	P52209;P52209-2;K7EMN2;K7EM49;K7EPF6	6PGD_HUMAN	PGD	6-phosphogluconate dehydrogenase, decarboxylating	19.472	19.289	19.596	18.2803	18.2241	17.8878
+	4.28978	0.549856	P52272;P52272-2	P52272;P52272-2;M0R0N3;M0R019;M0R2T0;M0QYQ7;A0A087X0X3	HNRPM_HUMAN	HNRNPM	Heterogeneous nuclear ribonucleoprotein M	25.9975	25.984	25.9246	25.4286	25.4472	25.3807
+	2.97139	-0.732038	P52294	P52294	IMA5_HUMAN	KPNA1	Importin subunit alpha-5	19.5455	19.5772	19.7163	20.3127	20.2454	20.477
+	3.41172	-1.22586	P52434	P52434;C9JLU1;P52434-3;P52434-4	RPAB3_HUMAN	POLR2H	DNA-directed RNA polymerases I, II, and III subunit RPABC3	19.5702	19.3062	19.497	20.6672	20.5561	20.8277
+	3.51287	-1.12445	P52435	P52435;E7EWC6;E7EP90;D6RAG0;E2QRJ6;A0A0B4J2F8;A0A0B4J1Z8;H0Y980	RPB11_HUMAN	POLR2J	DNA-directed RNA polymerase II subunit RPB11-a	18.4896	18.5147	18.2773	19.5326	19.6636	19.4586
+	2.78011	1.29994	P52565	P52565;J3KRE2;J3KTF8;J3QQX2	GDIR1_HUMAN	ARHGDIA	Rho GDP-dissociation inhibitor 1	20.2089	20.0307	20.0458	18.7426	19.0997	18.5433
+	3.49443	0.718355	P52701	P52701;P52701-2;P52701-3;P52701-4;A0A8V8TQJ0;A0A8V8TQW9;A0A8V8TPJ4;A0A494C0M1	MSH6_HUMAN	MSH6	DNA mismatch repair protein Msh6	22.9362	22.9298	22.7486	22.1418	22.1713	22.1464
+	1.68039	0.553485	P52732	P52732;A0A7I2YQY4;A0A7I2V3A9;A0A7I2V3V3	KIF11_HUMAN	KIF11	Kinesin-like protein KIF11	19.3493	19.1257	19.5669	18.739	18.9489	18.6936
+	3.16374	0.466424	P52756	P52756;P98175;P98175-2;P98175-3;P98175-4;P98175-5	RBM5_HUMAN	RBM5	RNA-binding protein 5	20.9655	20.997	21.0847	20.5479	20.4916	20.6085
+	1.42177	0.514769	P52815	P52815;B4DLN1	RM12_HUMAN	MRPL12	39S ribosomal protein L12, mitochondrial	19.3732	19.2267	19.1934	18.5152	18.6802	19.0535
+	5.51736	1.48577	P52907	P52907;P47755	CAZA1_HUMAN	CAPZA1	F-actin-capping protein subunit alpha-1	26.1489	26.0471	26.0569	24.5837	24.6435	24.5684
+	1.09773	1.88969	P52943	P52943;H0YHD8	CRIP2_HUMAN	CRIP2	Cysteine-rich protein 2	18.4316	18.1452	18.3799	17.0088	17.4395	14.8393
+	2.88258	1.37667	P52948;P52948-5	P52948;P52948-2;P52948-3;P52948-4;P52948-5;P52948-6;H0YEN4;H0YDA1;H0YCR0;A0A8V8TRC7;A0A8V8TQF7;A0A8V8TQG5;A0A8V8TR21;A0A8V8TR23;A0A8V8TPW9;A0A8V8TPX4;A0A3B3ITD8	NUP98_HUMAN	NUP98	Nuclear pore complex protein Nup98-Nup96	20.5438	20.7265	20.7529	19.0787	19.6058	19.2088
+	2.92651	0.562563	P53350	P53350	PLK1_HUMAN	PLK1	Serine/threonine-protein kinase PLK1	20.585	20.5747	20.4298	20.0082	20.0189	19.8746
+	2.93101	0.986298	P53396	P53396;P53396-2;P53396-3	ACLY_HUMAN	ACLY	ATP-citrate synthase	21.3449	21.3972	21.5837	20.2782	20.6028	20.4859
+	2.09224	1.18122	P53597	P53597	SUCA_HUMAN	SUCLG1	Succinate--CoA ligase [ADP/GDP-forming] subunit alpha, mitochondrial	18.7059	18.8364	19.0928	17.9004	17.2713	17.9198
+	3.00505	0.746201	P53618	P53618	COPB_HUMAN	COPB1	Coatomer subunit beta	21.0039	21.0557	21.2486	20.274	20.372	20.4235
+	3.66396	0.336722	P53621	P53621;P53621-2;A0A3B3IS84;A0A3B3IT15;A0A3B3ISC6;A0A3B3ITV3;A0A3B3IU89	COPA_HUMAN	COPA	Coatomer subunit alpha	22.6321	22.6861	22.7181	22.3545	22.3268	22.3447
+	1.94	1.2176	P53680	P53680;P53680-2;M0R0N4;M0R1S0;M0QZ21;M0QYZ2;X6R390	AP2S1_HUMAN	AP2S1	AP-2 complex subunit sigma	21.4192	21.0297	20.7216	19.5823	19.732	20.2035
+	3.34854	0.572562	P53804	P53804;A8MT23;H7BZ57;E9PMP8;E9PMS7;E9PCE7;A0A8Q3WLN3;A0A8Q3WLK8	TTC3_HUMAN	TTC3	E3 ubiquitin-protein ligase TTC3	20.1663	20.1412	20.2936	19.5753	19.6565	19.6517
+	1.84204	0.735341	P53814;P53814-5;P53814-6	P53814;A0A096LNK9;P53814-2;P53814-5;P53814-6;A0A087X1R1;A0A087WVP4	SMTN_HUMAN	SMTN	Smoothelin	18.6722	18.1075	18.3256	17.7054	17.4986	17.6952
+	2.53316	0.766378	P53985	P53985;P53985-2;Q5T8R3;Q5T8R5	MOT1_HUMAN	SLC16A1	Monocarboxylate transporter 1	20.1344	20.3343	20.3598	19.5239	19.3396	19.6659
+	1.63161	0.507488	P53990;P53990-2;P53990-4;P53990-5	P53990;J3KR23;H3BUI0;H3BMU1;P53990-3;P53990-4;P53990-6;P53990-2;P53990-5	IST1_HUMAN	IST1	IST1 homolog	18.1698	18.6286	18.4239	17.8558	18.0015	17.8426
+	2.14089	1.27019	P53992	P53992;G5EA31	SC24C_HUMAN	SEC24C	Protein transport protein Sec24C	18.531	19.2233	19.2134	17.8582	17.7826	17.5163
+	1.78377	0.327541	P54105	P54105;J3KN38;E9PQ83;E9PMI6;E9PJF4	ICLN_HUMAN	CLNS1A	Methylosome subunit pICln	19.7996	19.735	19.678	19.3905	19.5477	19.2917
+	3.39728	0.915512	P54136	P54136;P54136-2	SYRC_HUMAN	RARS1	Arginine--tRNA ligase, cytoplasmic	22.7466	22.6786	22.5538	21.8382	21.7673	21.6269
+	1.11027	-1.19024	P54277;P54277-3	P54277;P54277-2;P54277-3;P54277-4;B7ZAA0;E9PH88	PMS1_HUMAN	PMS1	PMS1 protein homolog 1	16.1493	16.0619	16.0036	18.2662	16.7811	16.7383
+	3.97846	1.20703	P54577	P54577;A0A6Q8PFX2	SYYC_HUMAN	YARS1	Tyrosine--tRNA ligase, cytoplasmic	22.058	21.9441	22.0971	20.7823	20.9518	20.7441
+	2.20571	1.18844	P54578;P54578-2;P54578-3	P54578;A6NJA2;P54578-2;P54578-3	UBP14_HUMAN	USP14	Ubiquitin carboxyl-terminal hydrolase 14	19.0029	18.9227	19.3509	17.953	18.194	17.5643
+	2.45272	0.73857	P54727	P54727;P54725;P54725-2;P54725-3;Q5W0S5;A0A494C0B4;K7ELW1;K7ENJ0	RD23B_HUMAN	RAD23B	UV excision repair protein RAD23 homolog B	21.3208	21.1515	21.5646	20.6107	20.6041	20.6064
+	2.98867	1.71553	P54819;P54819-2	P54819;P54819-2;P54819-3;P54819-4;P54819-5;P54819-6;F8VZG5;F8VY04;F8W1A4;G3V213;A0A5F9ZHP2;A0A5K1VW67	KAD2_HUMAN	AK2	Adenylate kinase 2, mitochondrial	19.8832	19.4761	19.6407	17.9342	18.2399	17.6794
+	3.10386	0.959796	P55010	P55010	IF5_HUMAN	EIF5	Eukaryotic translation initiation factor 5	22.285	22.1434	22.0276	21.0449	21.2605	21.2712
+	3.2953	1.11155	P55036	P55036;H0Y3Y9;Q5VWC4;P55036-2	PSMD4_HUMAN	PSMD4	26S proteasome non-ATPase regulatory subunit 4	20.8491	20.6787	20.7382	19.4592	19.7819	19.6903
+	1.62553	1.52555	P55039	P55039;A8MZF9;J3KRL5;J3QKW7;J3QL90;J3QKV7;J3QR71;J3QRI9	DRG2_HUMAN	DRG2	Developmentally-regulated GTP-binding protein 2	17.7525	17.9247	18.3129	17.0082	15.699	16.7062
+	2.73733	1.04988	P55060;P55060-3	P55060;P55060-3;P55060-4	XPO2_HUMAN	CSE1L	Exportin-2	21.9012	22.1956	22.3923	21.1018	21.1299	21.1078
+	3.33328	0.990412	P55072	P55072;C9JUP7;A0A7P0T8Q5;A0A7P0T8A3;A0A7P0TAW3;A0A7P0TA22;A0A7I2V540	TERA_HUMAN	VCP	Transitional endoplasmic reticulum ATPase	21.8787	21.8017	21.9322	20.799	21.053	20.7894
+	2.97461	0.216559	P55081	P55081	MFAP1_HUMAN	MFAP1	Microfibrillar-associated protein 1	23.2688	23.2569	23.1999	23.0287	23.048	22.9993
+	2.47516	0.47824	P55084	P55084;B5MD38;P55084-2;F5GZQ3	ECHB_HUMAN	HADHB	Trifunctional enzyme subunit beta, mitochondrial	20.3307	20.3396	20.304	19.7901	19.7528	19.9966
+	1.10031	0.494298	P55197;P55197-1	P55197;P55197-1;Q5JT35	AF10_HUMAN	MLLT10	Protein AF-10	18.5495	19.0227	18.8444	18.2069	18.6253	18.1016
+	1.04325	0.659753	P55198	P55198	AF17_HUMAN	MLLT6	Protein AF-17	18.4792	17.9875	18.0771	17.9412	17.5648	17.0586
+	1.39378	0.696023	P55209;P55209-2	P55209;H0YIV4;P55209-2;F8VXI6;F8VY35;F8VVB5;F8VUX1;F8W0J6;F8W020;F5H4R6	NP1L1_HUMAN	NAP1L1	Nucleosome assembly protein 1-like 1	24.7543	24.6794	25.1062	24.2646	24.4115	23.7758
+	4.27906	0.399135	P55265	P55265;A0A7P0Z4K3;A0A3B3IRQ9;A0A3B3ISU1;A0A3B3ISX1;A2IBT1;P55265-2;P55265-3;P55265-4	DSRAD_HUMAN	ADAR	Double-stranded RNA-specific adenosine deaminase	22.7163	22.7525	22.7217	22.3499	22.2937	22.3495
+	3.04915	1.60317	P55327-7	P55327;H0YC44;P55327-2;P55327-3;P55327-4;P55327-5;P55327-6;P55327-7;P55327-8;E5RFR7;H0YC42	TPD52_HUMAN	TPD52	Isoform of P55327, Isoform 7 of Tumor protein D52	20.0991	19.6292	20.1811	18.2672	18.3722	18.4605
+	2.33535	1.15988	P55735	P55735	SEC13_HUMAN	SEC13	Protein SEC13 homolog	20.7176	20.7076	21.1088	19.8143	19.8617	19.3784
+	4.55047	1.08194	P55786	A6NEC2;P55786;P55786-2;E9PPZ2;E9PP11;E9PLK3;A0A8V8TQ95;A0A7I2V389;A0A7I2V3W8;A0A7I2V604	PSA_HUMAN	NPEPPS	Puromycin-sensitive aminopeptidase	20.7715	20.8426	20.8819	19.7403	19.8218	19.6882
+	3.21748	0.567662	P55795	P31943;P55795;G8JLB6;D6RBM0;H0YB39;H0YBD7;E9PCY7;E7EN40;E5RGV0	HNRH2_HUMAN	HNRNPH2	Heterogeneous nuclear ribonucleoprotein H2	23.0531	23.0068	23.1748	22.5673	22.4924	22.4719
+	2.48654	1.02324	P55809	P55809;Q9BYC2;P55809-2;E9PDW2	SCOT1_HUMAN	OXCT1	Succinyl-CoA:3-ketoacid coenzyme A transferase 1, mitochondrial	18.6055	18.5243	18.5767	17.5939	17.797	17.2459
+	2.08843	1.06331	P55854;P55854-2;P61956;P61956-2;Q6EEV6	Q6EEV6;P61956;P55854;A8MU27;A8MUA9;P61956-2;P55854-2	SUMO2_HUMAN;SUMO3_HUMAN;SUMO4_HUMAN	SUMO2;SUMO3;SUMO4	Small ubiquitin-related modifier 3	20.1868	19.5172	19.5793	18.7246	18.6139	18.7549
+	3.01204	-0.369113	P55884;P55884-2	P55884;P55884-2;C9JZG1;C9JQN7	EIF3B_HUMAN	EIF3B	Eukaryotic translation initiation factor 3 subunit B	25.8379	25.8184	25.7149	26.1907	26.1623	26.1255
+	1.37199	0.451754	P56134-2;P56134-4	P56134;C9JU26;P56134-2;P56134-4;P56134-3;C9JJT5;G3V325	ATPK_HUMAN	ATP5MF	Isoform of P56134, Isoform 2 of ATP synthase subunit f, mitochondrial	19.8289	20.0449	20.2955	19.5467	19.516	19.7513
+	2.77089	3.20481	P56181-2	P56181-2	NDUV3_HUMAN	NDUFV3	Isoform of P56181, Isoform 2 of NADH dehydrogenase [ubiquinone] flavoprotein 3, mitochondrial	17.7799	18.1438	18.2845	14.0965	15.0532	15.444
+	2.00168	0.360041	P56182	P56182;D6RE82	RRP1_HUMAN	RRP1	Ribosomal RNA processing protein 1 homolog A	21.5771	21.6283	21.7315	21.1608	21.3271	21.3689
+	3.34697	0.65105	P56192	P56192;H0YHV5;P56192-2	SYMC_HUMAN	MARS1	Methionine--tRNA ligase, cytoplasmic	22.4084	22.5093	22.4592	21.7381	21.7712	21.9145
+	2.02574	0.992688	P56556	P56556;A0A2Y9D025;R4GN43	NDUA6_HUMAN	NDUFA6	NADH dehydrogenase [ubiquinone] 1 alpha subcomplex subunit 6	17.0376	16.912	16.4572	16.0181	15.6108	15.7998
+	2.43835	0.796429	P57088	P57088;D6RAA6	TMM33_HUMAN	TMEM33	Transmembrane protein 33	21.3529	21.472	21.6921	20.7821	20.5407	20.805
+	3.15994	0.490435	P57678	P57678;I3L4A4;I3L399;I3L2C7	GEMI4_HUMAN	GEMIN4	Gem-associated protein 4	23.2227	23.2493	23.1237	22.7472	22.6385	22.7387
+	1.71212	2.10994	P57682;P57682-2	P57682;P57682-2	KLF3_HUMAN	KLF3	Krueppel-like factor 3	18.2501	18.1335	18.3347	16.8076	16.5512	15.0297
+	1.84344	0.705876	P57740	P57740;P57740-2;P57740-3	NU107_HUMAN	NUP107	Nuclear pore complex protein Nup107	19.4052	19.4998	19.6207	19.0564	18.8407	18.5111
+	1.32934	3.10647	P57764	P57764;G3V1A6;E9PIB2	GSDMD_HUMAN	GSDMD	Gasdermin-D	17.977	18.6144	18.2235	16.1828	13.0107	16.302
+	2.39524	0.324997	P57772	P57772;P57772-2	SELB_HUMAN	EEFSEC	Selenocysteine-specific elongation factor	21.4738	21.5434	21.6041	21.1748	21.1768	21.2948
+	2.4936	0.797391	P58107	P58107;A0A075B730	EPIPL_HUMAN	EPPK1	Epiplakin	20.4505	20.5733	20.5829	19.9702	19.6662	19.578
+	1.51741	0.443333	P58317	P58317	ZN121_HUMAN	ZNF121	Zinc finger protein 121	19.7001	19.3539	19.3382	19.109	18.893	19.0602
+	1.34776	2.94332	P58546	P58546;C9JL85	MTPN_HUMAN	MTPN	Myotrophin	18.5476	17.9575	18.3153	14.035	17.3124	14.6431
+	0.861212	-0.903074	P58557	P58557	YBEY_HUMAN	YBEY	Endoribonuclease YbeY	16.0532	17.2652	15.9964	16.8849	17.7777	17.3615
+	2.87544	0.611488	P59780	P59780;H0YLI7;Q7Z6K5-2;A0A0A6YYH1	AP3S2_HUMAN	AP3S2	AP-3 complex subunit sigma-2	20.7983	20.6333	20.681	20.0188	20.2089	20.0504
+	4.21165	1.19367	P59998	P59998;P59998-2;P59998-3;F8WDD7;F8WCF6;H7C0A3;A0A0A6YYG9	ARPC4_HUMAN	ARPC4	Actin-related protein 2/3 complex subunit 4	22.4953	22.357	22.566	21.2467	21.337	21.2536
+	2.64973	-1.57294	P60006;P60006-2	P60006;F8WDQ6;P60006-2;G5EA39;F5GXB9;F5H6E4;F5H2T3;F5H3R3	APC15_HUMAN	ANAPC15	Anaphase-promoting complex subunit 15	16.4846	15.846	16.4295	17.6376	17.8841	17.9572
+	1.60312	1.18349	P60174;P60174-3	P60174;U3KPZ0;U3KQF3;P60174-3;P60174-4	TPIS_HUMAN	TPI1	Triosephosphate isomerase	20.1805	20.7376	19.7443	19.2733	19.1511	18.6875
+	3.77553	-0.33246	P60228	P60228;B3KW56;E5RGA2;E5RHS5;A0A7I2V2H9;A0A7I2V2W0;A0A7I2V3I0;A0A7I2V3I2;A0A7I2V3S3;A0A7I2V4B4;A0A7I2V5P9;A0A7I2V5Z6	EIF3E_HUMAN	EIF3E	Eukaryotic translation initiation factor 3 subunit E	25.5231	25.4881	25.497	25.8295	25.8758	25.8002
+	4.31847	0.919042	P60468	P60468	SC61B_HUMAN	SEC61B	Protein transport protein Sec61 subunit beta	21.9127	22.05	21.9464	21.0236	21.1038	21.0245
+	5.29057	1.54672	P60660-2	P60660;J3KND3;G8JLA2;F8VZU9;F8W180;F8W1R7;F8VPF3;B7Z6Z4;G3V1V0;G3V1Y7;P60660-2	MYL6_HUMAN	MYL6	Isoform of P60660, Isoform Smooth muscle of Myosin light polypeptide 6	28.2082	28.0635	28.1395	26.5507	26.5951	26.6253
+	4.61458	1.25937	P60709	P60709;P63261;J3KT65;A0A2R8Y793;A0A6Q8PFE4;E7EVS6;A0A6Q8PH58;A0A2R8YGF8;C9JZR7;C9JUM1;A0A804GS07;G5E9R0;K7EM38;I3L4N8;I3L3R2;I3L3I0;I3L1U9	ACTB_HUMAN	ACTB	Actin, cytoplasmic 1	32.0741	32.0081	32.0084	30.676	30.8562	30.7804
+	1.63964	0.364189	P60842	P60842;J3KS25;J3KT12;J3KSZ0;J3KTB5;P60842-2;J3QKZ9;J3QL43;J3QLN6;J3QR64;J3QS69	IF4A1_HUMAN	EIF4A1	Eukaryotic initiation factor 4A-I	23.2253	23.095	23.3786	22.8198	22.799	22.9876
+	3.09946	1.33838	P60880	P60880;P60880-2	SNP25_HUMAN	SNAP25	Synaptosomal-associated protein 25	18.4306	18.4279	18.3725	16.8096	17.0953	17.311
+	3.18817	1.11084	P60900	P60900;P60900-2;P60900-3;G3V5Z7;G3V3I1;G3V295	PSA6_HUMAN	PSMA6	Proteasome subunit alpha type-6	20.3876	20.447	20.3508	19.4529	19.0728	19.3272
+	2.9801	1.08794	P60903	P60903	S10AA_HUMAN	S100A10	Protein S100-A10	21.2937	21.3876	21.5091	20.1604	20.2387	20.5275
+	3.07291	0.926809	P60953	P60953	CDC42_HUMAN	CDC42	Cell division control protein 42 homolog	20.188	20.1891	20.3473	19.3326	19.458	19.1533
+	0.910286	2.53524	P60981;P60981-2	P60981;P60981-2;F6RFD5	DEST_HUMAN	DSTN	Destrin	19.1353	18.8192	19.2288	18.0059	17.6247	13.9469
+	2.91376	0.878784	P61019	P61019;Q8WUD1;H0YD31;E9PKL7;E9PE37;A0A3B3ITL1	RAB2A_HUMAN	RAB2A	Ras-related protein Rab-2A	19.3138	19.4247	19.6432	18.6673	18.5722	18.5059
+	2.68827	1.56705	P61026	P61026	RAB10_HUMAN	RAB10	Ras-related protein Rab-10	19.4233	18.6837	19.0837	17.4893	17.4107	17.5895
+	2.64465	1.391	P61088	P61088;F8VZ29;F8VV71;F8VSD4	UBE2N_HUMAN	UBE2N	Ubiquitin-conjugating enzyme E2 N	20.39	19.9317	20.5548	19.0451	18.8004	18.8581
+	1.00915	0.73009	P61106	P61106;X6RFL8	RAB14_HUMAN	RAB14	Ras-related protein Rab-14	20.2144	20.5527	20.1538	19.6152	20.104	19.0115
+	2.56403	0.840094	P61158	P61158;B4DXW1	ARP3_HUMAN	ACTR3	Actin-related protein 3	22.7677	22.5136	22.8626	21.741	21.9929	21.8897
+	2.45126	0.834197	P61160	P61160;A0A1B0GWH0;A0A1B0GWD0;P61160-2	ARP2_HUMAN	ACTR2	Actin-related protein 2	22.4269	22.2754	22.7217	21.5878	21.706	21.6276
+	3.5959	1.33737	P61163	P61163;A0A1B0GVS3;R4GMT0	ACTZ_HUMAN	ACTR1A	Alpha-centractin	21.1798	21.1879	21.3782	19.7362	20.0071	19.9905
+	4.57444	2.97707	P61201;P61201-2	P61201;B4DIH5;P61201-2	CSN2_HUMAN	COPS2	COP9 signalosome complex subunit 2	18.4608	18.3346	18.2873	15.1353	15.463	15.5533
+	3.53587	-0.957774	P61218	P61218;B0QYL8;B0QYL9;F8WC47;U3KQB0;U3KPY1;U3KQS8	RPAB2_HUMAN	POLR2F	DNA-directed RNA polymerases I, II, and III subunit RPABC2	18.6234	18.8089	18.7729	19.649	19.6225	19.807
+	2.09506	1.00426	P61225	P61225;Q9Y3L5;P10114;F6U784	RAP2B_HUMAN	RAP2B	Ras-related protein Rap-2b	20.8552	21.1054	21.2273	19.7167	20.1807	20.2778
+	0.958018	0.931765	P61289;P61289-2	P61289;P61289-2;P61289-3;K7EKR3;K7EMD0;K7ENH2;K7EPX6;K7ESG5;B3KQ25;K9J957	PSME3_HUMAN	PSME3	Proteasome activator complex subunit 3	18.89	18.5661	18.8705	17.8959	18.5838	17.0516
+	3.42979	1.1177	P61421	P61421;H3BQJ1;F5GYQ1	VA0D1_HUMAN	ATP6V0D1	V-type proton ATPase subunit d 1	18.9566	19.028	19.1196	18.0211	17.7405	17.9895
+	2.1717	0.889494	P61586	P61586;A0A7I2YQV1	RHOA_HUMAN	RHOA	Transforming protein RhoA	20.1872	20.1343	19.8502	18.9807	19.0871	19.4354
+	3.06461	2.07608	P61604	P61604;B8ZZL8;S4R3N1	CH10_HUMAN	HSPE1	10 kDa heat shock protein, mitochondrial	22.2175	22.0547	21.8374	19.8325	20.3602	19.6886
+	2.28125	0.45016	P61619	P61619;C9JXC6;B4DR61;P61619-3;A0A8V8TMZ3;A0A8V8TMZ5	S61A1_HUMAN	SEC61A1	Protein transport protein Sec61 subunit alpha isoform 1	21.8195	21.8481	22.0572	21.5217	21.4306	21.4219
+	2.17875	1.14363	P61626	P61626;F8VV32;A0A0B4J259	LYSC_HUMAN	LYZ	Lysozyme C	19.2275	19.7057	19.2789	18.5601	18.2114	18.0096
+	1.57889	2.50195	P61764;P61764-2	P61764;A0A2R8Y5D4;P61764-2;A0A1B0GTP9;A0A1B0GWF2;A0A1B0GVQ5;A0A0D9SG72	STXB1_HUMAN	STXBP1	Syntaxin-binding protein 1	16.9142	17.3955	17.2344	15.1119	13.2844	15.642
+	2.96277	2.57009	P61769	P61769;H0YLF3;F5H6I0	B2MG_HUMAN	B2M	Beta-2-microglobulin	18.7107	19.163	19.3563	16.506	16.0948	16.9188
+	2.44502	1.05438	P61923	P61923;P61923-4;P61923-5;F8VYZ4;F8VXB1;F8VXR1;F8VVA7;F8VUC5;F8W156	COPZ1_HUMAN	COPZ1	Coatomer subunit zeta-1	19.623	19.8114	20.0517	18.5429	18.8407	18.9394
+	1.71204	1.70178	P61927	P61927;D6RG19;D6R9X9	RL37_HUMAN	RPL37	60S ribosomal protein L37	24.2405	24.4002	23.5391	22.7315	22.7129	21.6301
+	1.87068	0.440566	P61962	P61962;A0A8I5QKQ1;P61962-2;A0A8I5KQ63;A0A8I5KRG1;A0A8I5KTU5;A0A8I5KT41;A0A8I5KX45;A0A8I5KXF0;A0A087WWI6	DCAF7_HUMAN	DCAF7	DDB1- and CUL4-associated factor 7	19.4843	19.7808	19.5266	19.0657	19.2297	19.1746
+	2.87869	0.687433	P61978-3	P61978;Q5T6W2;P61978-2;P61978-3	HNRPK_HUMAN	HNRNPK	Isoform of P61978, Isoform 3 of Heterogeneous nuclear ribonucleoprotein K	22.7223	22.6861	22.7889	22.0587	22.1771	21.8994
+	2.61344	1.12443	P61981	P61981	1433G_HUMAN	YWHAG	14-3-3 protein gamma	22.0631	21.8871	22.3189	20.7529	21.1019	21.041
+	2.69773	1.07018	P62068;P62068-2;P62068-3;P62068-4	P62068;P62068-2;P62068-3;P62068-4;H7BZK6	UBP46_HUMAN	USP46	Ubiquitin carboxyl-terminal hydrolase 46	17.0571	17.1387	17.5159	16.1976	16.0725	16.231
+	4.89904	1.2274	P62070;P62070-4	P62070;P62070-2;P62070-3;P62070-4;E9PK85	RRAS2_HUMAN	RRAS2	Ras-related protein R-Ras2	22.8515	22.9093	22.9422	21.606	21.6748	21.7399
+	2.82123	0.627365	P62136	P36873;P62140;P62136;C9J9S3;P36873-2;F8VYE8;C9JP48;F8VR82;F8W0W8;B4DJ75;H0Y3Y6;E9PMD7;A0A8V8TRH9;A0A8V8TQ71;P62136-2;P62136-3;A0A087WYY5;A0A7I2V4F7	PP1A_HUMAN	PPP1CA	Serine/threonine-protein phosphatase PP1-alpha catalytic subunit	20.9082	20.7848	20.72	20.0672	20.1918	20.2718
+	1.32093	0.676044	P62140	P62140;B4DJ75;A0A8V8TRH9;A0A8V8TQ71	PP1B_HUMAN	PPP1CB	Serine/threonine-protein phosphatase PP1-beta catalytic subunit	21.9614	21.7987	21.7176	20.9193	20.9231	21.6071
+	1.58433	1.4481	P62166;P62166-2	P62166;P62166-2	NCS1_HUMAN	NCS1	Neuronal calcium sensor 1	17.6895	17.4796	17.8047	15.6421	17.0031	15.9842
+	4.09887	1.19198	P62191	P62191;P62191-2	PRS4_HUMAN	PSMC1	26S proteasome regulatory subunit 4	21.337	21.3595	21.4225	20.0538	20.2046	20.2847
+	3.01794	0.877725	P62195	P62195;J3KRP2;P62195-2;J3QLH6;J3QQM1;J3QRR3;J3QSA9	PRS8_HUMAN	PSMC5	26S proteasome regulatory subunit 8	21.077	21.0629	21.059	19.9872	20.2887	20.2898
+	3.20885	1.11453	P62258	P62258;P62258-2;K7EM20	1433E_HUMAN	YWHAE	14-3-3 protein epsilon	23.4766	23.3682	23.6405	22.3036	22.5452	22.293
+	1.30453	0.383571	P62266	P62266	RS23_HUMAN	RPS23	40S ribosomal protein S23	29.2319	29.176	29.0645	28.9098	28.8952	28.5167
+	1.14561	-0.543765	P62273	P62273;A0A2R8Y851;A0A2R8Y6P7;P62273-2;A0A087WTT6	RS29_HUMAN	RPS29	40S ribosomal protein S29	27.9531	27.8823	27.2658	28.2342	28.3296	28.1687
+	2.87629	0.663418	P62306	P62306;F8W0W6;A0A0B4J254	RUXF_HUMAN	SNRPF	Small nuclear ribonucleoprotein F	22.0734	22.1946	22.2869	21.631	21.4819	21.4518
+	1.23492	0.41119	P62314	P62314;J3QLI9	SMD1_HUMAN	SNRPD1	Small nuclear ribonucleoprotein Sm D1	23.2141	23.3241	22.935	22.7122	22.5842	22.9433
+	3.15358	0.651676	P62316	P62316;K7ERG4	SMD2_HUMAN	SNRPD2	Small nuclear ribonucleoprotein Sm D2	23.5258	23.6	23.5739	22.9209	22.7985	23.0253
+	2.52704	0.677176	P62318;P62318-2	P62318;P62318-2;H3BT13	SMD3_HUMAN	SNRPD3	Small nuclear ribonucleoprotein Sm D3	25.0558	25.1762	25.004	24.4373	24.2277	24.5394
+	3.11194	1.81779	P62328	P62328	TYB4_HUMAN	TMSB4X	Thymosin beta-4	20.6063	20.3559	20.1542	18.2617	18.6635	18.7378
+	3.89581	0.815777	P62333	P62333;H0YJS8;H0YJC0;A0A087X2I1	PRS10_HUMAN	PSMC6	26S proteasome regulatory subunit 10B	20.158	20.1603	20.2856	19.3606	19.4575	19.3385
+	3.74122	-0.879461	P62487	P62487;H0YEE4;E9PIU7;E9PKH3	RPB7_HUMAN	POLR2G	DNA-directed RNA polymerase II subunit RPB7	18.4449	18.3995	18.2937	19.2088	19.3553	19.2125
+	3.16261	1.72173	P62491;P62491-2;Q15907;Q15907-2	P62491;Q15907;H3BSC1;B4DQU5;P62491-2;H3BMH2;Q15907-2	RB11A_HUMAN;RB11B_HUMAN	RAB11A;RAB11B	Ras-related protein Rab-11A	20.319	20.5095	20.6516	18.8566	18.985	18.4733
+	1.84536	0.477161	P62495	P62495;P62495-2;B7Z7P8	ERF1_HUMAN	ETF1	Eukaryotic peptide chain release factor subunit 1	19.7775	19.5838	19.9698	19.3226	19.243	19.3341
+	2.8152	1.1516	P62714;P67775	P67775;P62714;H0YBN9;P67775-2;A0A8V8TRB3;A0A8V8TQA1;A0A8V8TQU8;B3KQ51	PP2AA_HUMAN;PP2AB_HUMAN	PPP2CA;PPP2CB	Serine/threonine-protein phosphatase 2A catalytic subunit beta isoform	20.2382	20.1623	19.902	18.8255	19.1677	18.8546
+	3.92236	1.62788	P62745	P08134;P62745;P61586;C9JX21;C9JRM1;Q5JR05;Q5JR06;Q5JR07;Q5JR08;C9JNR4;E9PQH6;E9PLA2;E9PN11;A0A7I2YQV1;A0A7I2V3G1;A0A7I2V5E6;U3KQA9;U3KQV3	RHOB_HUMAN	RHOB	Rho-related GTP-binding protein RhoB	19.9808	20.0351	20.186	18.5645	18.4909	18.2629
+	1.09136	0.589198	P62805	P62805	H4_HUMAN	H4C16	Histone H4	33.2623	33.1717	32.4679	32.4094	32.4212	32.3036
+	3.20457	1.31677	P62820	Q9H0U4;P62820;E9PLD0;E7END7;P62820-2	RAB1A_HUMAN	RAB1A	Ras-related protein Rab-1A	20.5446	20.6685	20.9867	19.4788	19.3816	19.3891
+	2.8888	1.43629	P62826	P62826;J3KQE5;H0YFC6;B5MDF5;F5H018	RAN_HUMAN	RAN	GTP-binding nuclear protein Ran	22.7386	22.3416	22.4037	21.1275	21.2389	20.8087
+	3.84724	1.37061	P62834	P62834;P61224;E7ESV4;P61224-2;P61224-3;F5GWU8;F5GX62;F5GYH7;F5GYB5;F5H6R7;F5H7Y6;F5H4H0;F5H500;F5H491;F5H0B7;F5H004;F5H077	RAP1A_HUMAN	RAP1A	Ras-related protein Rap-1A	21.6818	21.6741	21.6279	20.1395	20.4657	20.2666
+	1.72748	0.277307	P62851	P62851	RS25_HUMAN	RPS25	40S ribosomal protein S25	31.1105	30.9815	31.011	30.7944	30.8392	30.6375
+	2.00159	0.304381	P62857	P62857	RS28_HUMAN	RPS28	40S ribosomal protein S28	30.1006	29.9493	30.1031	29.6627	29.7819	29.7952
+	4.0549	1.31423	P62873	P62873;F6UT28;F6X3N5;P62873-2;B1AKQ8	GBB1_HUMAN	GNB1	Guanine nucleotide-binding protein G(I)/G(S)/G(T) subunit beta-1	24.5717	24.6218	24.7716	23.2402	23.3498	23.4324
+	1.03143	-0.645474	P62875	P62875	RPAB5_HUMAN	POLR2L	DNA-directed RNA polymerases I, II, and III subunit RPABC5	20.0253	20.0256	20.5385	21.0586	21.1026	20.3647
+	2.16899	0.878641	P62877	P62877	RBX1_HUMAN	RBX1	E3 ubiquitin-protein ligase RBX1	20.74	20.7281	20.9841	19.7217	19.8703	20.2243
+	3.9098	1.19423	P62879	P62873;P62879;P62879-2;E7EP32;B3KVK2	GBB2_HUMAN	GNB2	Guanine nucleotide-binding protein G(I)/G(S)/G(T) subunit beta-2	26.4636	26.533	26.5139	25.1836	25.2911	25.4531
+	3.24644	-0.591953	P62913	P62913;Q5VVC8;P62913-2	RL11_HUMAN	RPL11	60S ribosomal protein L11	29.3656	29.4867	29.454	30.0214	30.1117	29.949
+	3.43257	1.70951	P62937	P62937;C9J5S7;F8WE65;A0A7I2V5J5	PPIA_HUMAN	PPIA	Peptidyl-prolyl cis-trans isomerase A	22.9096	22.4072	22.7128	20.9342	21.0592	20.9077
+	1.51531	0.291161	P62979	P62979	RS27A_HUMAN	RPS27A	Ubiquitin-40S ribosomal protein S27a	26.1207	26.1343	25.8869	25.8215	25.69	25.757
+	3.25202	1.18824	P63000-2	P15153;P60763;P63000;J3KSC4;P63000-2;B1AH80;B1AH77;B1AH78;J3QLK0	RAC1_HUMAN	RAC1	Isoform of P63000, Isoform B of Ras-related C3 botulinum toxin substrate 1	23.6187	23.8276	23.9081	22.4385	22.6406	22.7105
+	4.08461	0.980082	P63010;P63010-2	P63010;K7EJ01;A0A087X253;A0A087WU93;A0A087WYD1;A0A087WZQ6;P63010-2;P63010-3	AP2B1_HUMAN	AP2B1	AP-2 complex subunit beta	21.2666	21.371	21.4015	20.4512	20.3038	20.3439
+	4.58449	1.39952	P63092-2;Q5JWF2-2	Q5JWF2;P63092;P63092-2;P63092-3;P63092-4;Q5JWE9;Q5JWF2-2;A0A804HIH4;A0A590UJY2;A0A590UJS2;A0A590UJQ9;A0A590UK28;A0A590UJF0;A0A0A0MR13;B0AZR9;A0A7I2V5R6	GNAS1_HUMAN;GNAS2_HUMAN	GNAS	Isoform of Q5JWF2, Isoform Gnas-2 of Guanine nucleotide-binding protein G(s) subunit alpha isoforms short	24.5769	24.5991	24.4704	23.0607	23.1522	23.2349
+	2.9458	1.42444	P63092-3	P63092-3;Q5JWE9;A0A590UJF0	GNAS2_HUMAN	GNAS	Isoform of Q5JWF2, Isoform 3 of Guanine nucleotide-binding protein G(s) subunit alpha isoforms short	20.2848	20.4355	20.0691	18.989	18.9553	18.5717
+	3.03098	1.23497	P63092;P63092-4;Q5JWF2	Q5JWF2;P63092;P63092-4;Q5JWD1;H0Y7E8;A0A590UJS2;A0A590UJQ9;A0A590UJX3;A0A0A0MR13;B0AZR9;A0A7I2V5R6	GNAS1_HUMAN;GNAS2_HUMAN	GNAS	Isoform of Q5JWF2, Guanine nucleotide-binding protein G(s) subunit alpha isoforms short	21.8509	21.9684	21.9386	20.4771	20.6347	20.9413
+	3.72656	1.26231	P63096-2	P63096;P63096-2;A0A3B3ITM0	GNAI1_HUMAN	GNAI1	Isoform of P63096, Isoform 2 of Guanine nucleotide-binding protein G(i) subunit alpha-1	24.4729	24.5246	24.3251	23.0967	23.1123	23.3267
+	2.85415	1.09567	P63104	P63104;P63104-2;E7EX29;H0YB80;B7Z2E6;B0AZS6	1433Z_HUMAN	YWHAZ	14-3-3 protein zeta/delta	23.1057	22.8998	23.2143	21.9696	22.1615	21.8017
+	1.551	0.379602	P63167	P63167;Q96FJ2	DYL1_HUMAN	DYNLL1	Dynein light chain 1, cytoplasmic	22.1293	22.1216	22.1495	21.925	21.7946	21.542
+	1.26053	0.496794	P63172	P63172	DYLT1_HUMAN	DYNLT1	Dynein light chain Tctex-type 1	19.5177	19.821	19.9975	19.0549	19.3242	19.4667
+	2.78794	0.942748	P63218	A0A804HLA8;P63218	GBG5_HUMAN	GNG5	Guanine nucleotide-binding protein G(I)/G(S)/G(O) subunit gamma-5	22.1444	21.9674	21.928	20.9185	21.0205	21.2725
+	1.66843	-0.999636	P63241	Q9GZV4;P63241;Q6IS14;C9J7B5;C9J4W5;P63241-2;F8WCJ1;I3L504;I3L397	IF5A1_HUMAN	EIF5A	Eukaryotic translation initiation factor 5A-1	23.8621	23.4866	23.6261	24.3559	24.4646	25.1533
+	1.65034	-0.359458	P63244	P63244;J3KPE3;D6RF23;D6REE5;D6RAC2;H0YAM7;H0YAF8;H0Y9P0;H0Y8W2;H0Y8R5	RACK1_HUMAN	RACK1	Receptor of activated protein C kinase 1	29.7976	29.5436	29.706	30.0532	30.1499	29.9224
+	3.42995	1.12789	P63267	P62736;P68133;P63267;P68032;F6QUT6;F6UVQ4;F8WB63;C9JFL5;A6NL76;B8ZZJ2;A0A804HKV3	ACTH_HUMAN	ACTG2	Actin, gamma-enteric smooth muscle	28.7464	28.6283	28.8485	27.4554	27.6875	27.6967
+	1.1571	-0.429691	P63272	P63272;D3DTZ5;J3QSB9	SPT4H_HUMAN	SUPT4H1	Transcription elongation factor SPT4	18.7631	18.7006	18.7532	19.3813	19.2999	18.8247
+	1.58703	1.11865	P63279	P63279;B0QYN7;H3BRD1;H3BQQ9;H3BPC4	UBC9_HUMAN	UBE2I	SUMO-conjugating enzyme UBC9	19.0796	18.7594	19.0745	17.4618	18.4552	17.6405
+	3.42952	2.3461	P63313	P63313	TYB10_HUMAN	TMSB10	Thymosin beta-10	21.7037	21.3468	21.7107	19.2275	19.5478	18.9476
+	2.68182	-0.551365	P67809	P67809;C9J5V9;H0Y449	YBOX1_HUMAN	YBX1	Y-box-binding protein 1	25.4137	25.3663	25.5339	26.045	26.0527	25.8703
+	3.94828	1.60154	P67936	P67936;P67936-2;A0A2R8YE05;K7ENT6;K7EPB9;A0A5F9UN72	TPM4_HUMAN	TPM4	Tropomyosin alpha-4 chain	25.2858	25.1769	25.2833	23.5532	23.8469	23.5413
+	4.67254	1.15883	P68104	P68104;Q5VTE0;Q5JR01;A0A087WV01;A0A087WVQ9;A6PW80;A0A7I2V3H3;A0A7I2V5N4;A0A7I2V659	EF1A1_HUMAN	EEF1A1	Elongation factor 1-alpha 1	26.8759	26.9661	26.847	25.7374	25.7989	25.6761
+	2.30254	1.2632	P68133	P62736;P68133;P68032;A6NL76;A0A804HKV3	ACTS_HUMAN	ACTA1	Actin, alpha skeletal muscle	24.4804	24.0202	24.7545	23.1029	23.2943	23.0683
+	2.47283	0.444386	P68366;P68366-2	P68366;P68363;Q71U36;Q9BQE3;A6NHL2;A6NHL2-2;Q71U36-2;F5H5D3;P68363-2;P68366-2	TBA4A_HUMAN	TUBA4A	Tubulin alpha-4A chain	26.0304	26.0839	25.9909	25.5958	25.474	25.7023
+	1.95263	0.506697	P68371	Q3ZCM7;P68371;A0A075B724	TBB4B_HUMAN	TUBB4B	Tubulin beta-4B chain	26.2118	26.2376	25.8854	25.6032	25.5932	25.6183
+	2.10799	1.3687	P68402	P68402;J3KNE3	PA1B2_HUMAN	PAFAH1B2	Platelet-activating factor acetylhydrolase IB subunit alpha2	18.3431	17.7628	17.6739	16.4083	16.3478	16.9175
+	2.29032	0.921731	P69905	P69905;A0A2R8Y7C0	HBA_HUMAN	HBA2	Hemoglobin subunit alpha	19.6829	19.7514	19.4382	18.7022	18.9379	18.4673
+	2.35795	1.13072	P78310	P78310;P78310-2;P78310-4;P78310-5;P78310-6;P78310-7	CXAR_HUMAN	CXADR	Coxsackievirus and adenovirus receptor	19.7227	19.9065	20.1789	18.5954	19.078	18.7425
+	2.12612	2.42815	P78330	P78330;C9JBI3	SERB_HUMAN	PSPH	Phosphoserine phosphatase	17.3923	16.9476	18	14.4776	14.8324	15.7454
+	1.13805	0.90969	P78332	P78332;F8WF63;F8WCA5;P78332-2;E9PGM9	RBM6_HUMAN	RBM6	RNA-binding protein 6	21.7963	21.354	20.8037	20.5008	20.7746	19.9494
+	1.02188	-2.451	P78337	P78337;Q99697;O75364;Q99697-2;Q99697-3;D6RFI4;A0A8J9C2I7;D6RBG8;D6R9U1;D6R955;U3KQ81	PITX1_HUMAN	PITX1	Pituitary homeobox 1	16.2064	16.9697	18.5206	18.8494	18.7248	21.4754
+	3.24261	0.598545	P78345	P78345	RPP38_HUMAN	RPP38	Ribonuclease P protein subunit p38	21.0287	20.9776	21.1327	20.4004	20.5254	20.4176
+	4.21251	1.1195	P78347;P78347-2;P78347-3;P78347-4	P78347;C9J6M0;A0A494C1K3;P78347-2;P78347-3;P78347-4;P78347-5;A0A8I5KVB5	GTF2I_HUMAN	GTF2I	General transcription factor II-I	22.7334	22.6435	22.5897	21.4449	21.6071	21.5562
+	3.30121	-0.802286	P78362-2	P78362;P78362-2;F8WBW4;H7C5L6;H7C521	SRPK2_HUMAN	SRPK2	Isoform of P78362, Isoform 2 of SRSF protein kinase 2	22.2667	22.151	22.3258	23.0963	23.1202	22.9339
+	1.94263	0.639937	P78368	P78368;K7EJC0;K7EP38;K7ESB6	KC1G2_HUMAN	CSNK1G2	Casein kinase I isoform gamma-2	19.1956	18.7477	19.1398	18.3288	18.3974	18.4371
+	3.10604	0.826967	P78371	P78371;P78371-2;F8VQ14;F5GWF6	TCPB_HUMAN	CCT2	T-complex protein 1 subunit beta	21.5501	21.4196	21.6632	20.6663	20.8298	20.656
+	3.22495	0.387216	P78406	P78406;B0QZ36;E9PPG9;E9PQ57	RAE1L_HUMAN	RAE1	mRNA export factor RAE1	21.1879	21.2681	21.1587	20.7833	20.8117	20.8581
+	3.9405	1.73414	P78417	P78417;Q5TA02;P78417-3	GSTO1_HUMAN	GSTO1	Glutathione S-transferase omega-1	19.1996	19.2682	19.5094	17.4584	17.6739	17.6425
+	2.85239	0.724076	P78524	P78524	DEN2B_HUMAN	DENND2B	DENN domain-containing protein 2B	19.5997	19.8091	19.8282	18.9772	18.9555	19.1321
+	4.77275	0.654731	P78527	P78527;P78527-2;A0A8V8TMR1	PRKDC_HUMAN	PRKDC	DNA-dependent protein kinase catalytic subunit	22.957	22.9836	23.0182	22.3317	22.2965	22.3665
+	1.60866	0.373201	P79522-2	P79522;P79522-2	PRR3_HUMAN	PRR3	Isoform of P79522, Isoform 2 of Proline-rich protein 3	21.137	21.3086	20.9604	20.6997	20.8184	20.7684
+	2.93781	1.15944	P80723	P80723;P80723-2	BASP1_HUMAN	BASP1	Brain acid soluble protein 1	25.5247	25.6495	25.7199	24.2198	24.6323	24.5637
+	1.92213	1.41348	P81605	P81605;P81605-2	DCD_HUMAN	DCD	Dermcidin	23.6078	23.5306	22.9454	22.0211	22.3338	21.4886
+	1.8049	-0.417315	P82663	P82663;E7EPW2;A0A8Q3WKE1;A0A8Q3WKH6;A0A8Q3WKJ5;A0A8Q3WLJ1;A0A8Q3SHU8;P82663-2;P82663-3	RT25_HUMAN	MRPS25	28S ribosomal protein S25, mitochondrial	19.4655	19.4723	19.439	19.9185	19.6807	20.0296
+	0.980452	-2.18233	P82664	P82664	RT10_HUMAN	MRPS10	28S ribosomal protein S10, mitochondrial	14.8215	15.8356	18.3156	18.6181	18.6073	18.2944
+	1.08186	-1.30103	P82673	P82673	RT35_HUMAN	MRPS35	28S ribosomal protein S35, mitochondrial	16.7348	18.4913	16.9073	18.5446	18.8351	18.6568
+	1.45237	0.420732	P82914	P82914	RT15_HUMAN	MRPS15	28S ribosomal protein S15, mitochondrial	20.5192	20.4529	20.4774	20.2569	20.1228	19.8077
+	0.882398	-1.52562	P82932	P82932	RT06_HUMAN	MRPS6	28S ribosomal protein S6, mitochondrial	14.9432	17.3702	17.252	17.9451	17.8425	18.3546
+	1.13492	3.0301	P82979	P82979;F8VZQ9;H0YHG0	SARNP_HUMAN	SARNP	SAP domain-containing ribonucleoprotein	20.193	20.0403	20.1739	16.5776	19.4941	15.2451
+	3.94156	0.784419	P83111	P83111;P83111-2	LACTB_HUMAN	LACTB	Serine beta-lactamase-like protein LACTB, mitochondrial	21.1542	21.0815	20.9992	20.3385	20.2456	20.2975
+	2.10597	3.1602	P83436	P83436	COG7_HUMAN	COG7	Conserved oligomeric Golgi complex subunit 7	18.1179	17.9256	18.0072	13.7323	14.8975	15.9403
+	2.1844	0.72643	P83916	P83916;J3KS05;B5MD17	CBX1_HUMAN	CBX1	Chromobox protein homolog 1	19.6739	19.2349	19.3789	18.7038	18.7951	18.6096
+	2.97013	1.17425	P84077	P61204;P84077;A0A8V8TQC0;A0A8V8TQP8;A0A8V8TNZ0;A0A8V8TNZ5;P61204-2;H0YGG7	ARF1_HUMAN	ARF1	ADP-ribosylation factor 1	21.4269	21.1806	21.3704	20.3707	20.1146	19.9699
+	1.4819	0.85375	P84085	P84085;C9J1Z8	ARF5_HUMAN	ARF5	ADP-ribosylation factor 5	17.4661	17.5295	17.3108	16.9265	16.744	16.0746
+	2.20843	0.97379	P84095	P84095	RHOG_HUMAN	RHOG	Rho-related GTP-binding protein RhoG	17.6002	18.1934	17.9742	16.9315	16.8477	17.0671
+	0.979475	-0.807088	P84098	P84098;J3KTE4;A0A7I2YQG2;J3QR09;A0A7I2V2L0;A0A7I2V4U6;A0A7I2V512	RL19_HUMAN	RPL19	60S ribosomal protein L19	30.551	30.4603	29.3513	30.9678	30.9062	30.9099
+	3.83636	3.87462	P84101;P84101-4	P84101;P84101-2;P84101-3;P84101-4;F8WBV6;F8WBN3;C9JQZ0;B9A031;B8ZZY7	SERF2_HUMAN	SERF2	Small EDRK-rich factor 2	18.8721	18.6473	18.189	14.3257	14.8313	14.9274
+	2.79004	0.494722	P84103;P84103-2	P84103;P84103-2;A0A087X2D0	SRSF3_HUMAN	SRSF3	Serine/arginine-rich splicing factor 3	26.3947	26.5131	26.2949	25.8738	25.9159	25.9289
+	0.945116	-1.15396	P86452	P86452	ZBED6_HUMAN	ZBED6	Zinc finger BED domain-containing protein 6	17.7095	16.4319	18.3781	18.6294	18.6572	18.6947
+	1.29578	0.718363	P98082;P98082-3	P98082;P98082-2;P98082-3	DAB2_HUMAN	DAB2	Disabled homolog 2	18.5644	18.9866	18.9936	17.8905	17.9346	18.5644
+	1.7274	-0.643813	P98160	P98160	PGBM_HUMAN	HSPG2	Basement membrane-specific heparan sulfate proteoglycan core protein	18.0378	17.9344	18.4309	18.8314	18.6318	18.8713
+	3.08038	0.537135	P98170	P98170;B1AKU2	XIAP_HUMAN	XIAP	E3 ubiquitin-protein ligase XIAP	21.595	21.5078	21.6643	21.0637	20.98	21.1119
+	2.39129	1.14053	P99999	P99999;C9JFR7	CYC_HUMAN	CYCS	Cytochrome c	18.6081	18.3041	18.1548	17.209	16.9779	17.4584
+	2.55172	0.526326	Q00059	Q00059;Q00059-2;H7BYN3	TFAM_HUMAN	TFAM	Transcription factor A, mitochondrial	23.0457	22.9781	22.8302	22.4221	22.5114	22.3416
+	2.56842	0.557354	Q00325;Q00325-2	Q00325;F8VVM2;Q00325-2	MPCP_HUMAN	SLC25A3	Phosphate carrier protein, mitochondrial	21.09	21.0492	20.8632	20.367	20.4341	20.5293
+	2.18559	0.253475	Q00341	Q00341;H0Y394;A0A024R4E5;H7C2D1;Q00341-2	VIGLN_HUMAN	HDLBP	Vigilin	23.2259	23.1517	23.2095	22.8792	22.9225	23.025
+	1.41902	0.537144	Q00577	Q00577	PURA_HUMAN	PURA	Transcriptional activator protein Pur-alpha	19.3434	19.3072	19.1587	18.545	19.0656	18.5873
+	2.03892	0.91276	Q00587;Q00587-2	Q00587;Q00587-2	BORG5_HUMAN	CDC42EP1	Cdc42 effector protein 1	19.6434	19.3493	19.8735	18.6137	18.9471	18.5671
+	4.85979	1.09609	Q00610;Q00610-2	P53675;Q00610;K7EJJ5;P53675-2;Q00610-2;A0A8V8TRE8;A0A8V8TRF0;A0A8V8TQK1;A0A8V8TQK3;A0A8V8TR47;A0A8V8TQ14;A0A8V8TQ18;A0A087WVQ6;A0A087WX41	CLH1_HUMAN	CLTC	Clathrin heavy chain 1	23.2281	23.2701	23.2854	22.0895	22.2209	22.1849
+	3.24818	1.12359	Q00653;Q00653-4	Q00653;Q00653-3;Q00653-4	NFKB2_HUMAN	NFKB2	Nuclear factor NF-kappa-B p100 subunit	19.9938	20.0866	19.9606	18.7432	18.8311	19.0959
+	3.14892	1.03611	Q00688	Q00688	FKBP3_HUMAN	FKBP3	Peptidyl-prolyl cis-trans isomerase FKBP3	20.8434	20.689	20.4728	19.6214	19.6777	19.5977
+	2.48784	-0.460162	Q00839	Q00839;Q00839-2;A0A1X7SBS1;A0A1W2PP34;A0A1W2PP35;A0A1W2PPS1;A0A1W2PQ74;A0A1W2PPH7;A0A1W2PPL4;A0A1W2PQL0;A0A1W2PQD4;A0A1W2PRZ7;Q5RI18	HNRPU_HUMAN	HNRNPU	Heterogeneous nuclear ribonucleoprotein U	25.2979	25.1995	25.0543	25.6807	25.6247	25.6267
+	2.2701	0.986769	Q00872;Q00872-10;Q00872-2;Q00872-3;Q00872-4;Q00872-5;Q00872-6;Q00872-7;Q00872-8;Q00872-9	Q00872;F8VZE0;F8VZY0;Q00872-10;G3V1V7;Q00872-2;Q00872-3;Q00872-4;Q00872-5;Q00872-6;Q00872-7;Q00872-8;Q00872-9	MYPC1_HUMAN	MYBPC1	Myosin-binding protein C, slow-type	20.3135	20.198	20.0429	19.4112	19.3024	18.8806
+	1.85417	0.377757	Q01081	Q01081;Q01081-2;Q01081-4	U2AF1_HUMAN	U2AF1	Splicing factor U2AF 35 kDa subunit	25.9427	26.0384	25.9066	25.5059	25.5007	25.7478
+	5.12564	1.09953	Q01082	O15020;Q01082;Q9H254;P11277;O15020-2;Q01082-2;Q01082-3;F8W6C1;Q9H254-2;Q9H254-4;M0QZQ3;A4QPE4;A0A087WUZ3;P11277-2;P11277-3;A0A087WYQ1	SPTB2_HUMAN	SPTBN1	Spectrin beta chain, non-erythrocytic 1	24.1162	24.0547	23.9894	22.9601	22.9462	22.9555
+	3.55309	0.574721	Q01085-2	Q01085;P31483;P31483-2;P31483-3;E7ETC0;E7ETJ9;Q01085-2;C9JTN7;F8W8I6;A6NKZ9;H7BY49;E5RGV5	TIAR_HUMAN	TIAL1	Isoform of Q01085, Isoform 2 of Nucleolysin TIAR	20.3166	20.3627	20.3034	19.8307	19.7514	19.6764
+	2.7893	-2.62851	Q01105	Q01105;A0A8I5KS71;A0A8I5KTZ2	SET_HUMAN	SET	Protein SET	16.4078	15.2918	15.8738	18.3294	18.7401	18.3894
+	3.88503	0.73857	Q01130	Q01130;J3KP15;Q01130-2;J3QL05	SRSF2_HUMAN	SRSF2	Serine/arginine-rich splicing factor 2	28.1631	28.1065	28.0837	27.4639	27.3105	27.3632
+	3.35356	1.17297	Q01518	Q01518;Q01518-2	CAP1_HUMAN	CAP1	Adenylyl cyclase-associated protein 1	20.4552	20.3305	20.5358	19.438	19.1189	19.2458
+	3.34704	1.03438	Q01650	Q01650;A0A0C4DGL4	LAT1_HUMAN	SLC7A5	Large neutral amino acids transporter small subunit 1	23.487	23.6894	23.6981	22.7287	22.525	22.5176
+	3.90271	1.12214	Q01658	Q01658	NC2B_HUMAN	DR1	Protein Dr1	22.2893	22.2686	22.2131	21.1533	21.251	21.0003
+	2.13413	0.377899	Q01804	Q01804;Q01804-5;Q01804-3	OTUD4_HUMAN	OTUD4	OTU domain-containing protein 4	20.8617	20.8791	20.7582	20.3607	20.425	20.5797
+	3.14469	0.61972	Q01813	Q01813;H0Y3Y3;B1APP6;A0A8V8TMY4;Q01813-2;A0A7I2V3Z0	PFKAP_HUMAN	PFKP	ATP-dependent 6-phosphofructokinase, platelet type	22.5804	22.6217	22.4494	21.9804	21.85	21.9619
+	2.20005	0.723719	Q01844;Q01844-3;Q01844-5;Q01844-6	Q01844;B0QYK0;C9JGE3;A0A0D9SFL3;H7BY36;Q01844-2;Q01844-3;Q01844-5;Q01844-6	EWS_HUMAN	EWSR1	RNA-binding protein EWS	25.9542	25.9038	25.5386	25.067	25.154	25.0045
+	4.29928	1.08529	Q01970	Q01970;Q01970-2	PLCB3_HUMAN	PLCB3	1-phosphatidylinositol 4,5-bisphosphate phosphodiesterase beta-3	20.2139	20.2582	20.1787	19.0256	19.2019	19.1674
+	1.30722	2.79618	Q01974	Q01974	ROR2_HUMAN	ROR2	Tyrosine-protein kinase transmembrane receptor ROR2	18.1139	18.4309	18.6601	14.0023	17.4118	15.4021
+	3.61124	0.514298	Q02040	Q02040	AK17A_HUMAN	AKAP17A	A-kinase anchor protein 17A	19.6917	19.7884	19.7041	19.161	19.2223	19.2581
+	0.993213	-0.873892	Q02086;Q02086-2	Q02086;Q02086-2	SP2_HUMAN	SP2	Transcription factor Sp2	17.2147	17.164	17.1879	18.8606	17.8445	17.4831
+	2.82344	0.922915	Q02218	Q02218;Q02218-2;E9PFG7;E9PCR7;E9PDF2	ODO1_HUMAN	OGDH	2-oxoglutarate dehydrogenase complex component E1	19.6661	19.8957	20.0356	18.8669	19.0403	18.9214
+	3.41342	0.97228	Q02241	Q02241;A0A2U3TZL8;H7BYN4;Q02241-2;Q02241-3;A0A7I2V5Y5	KIF23_HUMAN	KIF23	Kinesin-like protein KIF23	21.2991	21.2432	21.1845	20.2451	20.1424	20.4225
+	1.35055	1.3724	Q02241-3	H0YME6;A0A2U3TZL8;Q02241-3;A0A7I2V5Y5	KIF23_HUMAN	KIF23	Isoform of Q02241, Isoform 3 of Kinesin-like protein KIF23	18.9378	18.4133	19.4083	18.122	16.8339	17.6864
+	3.07697	0.69736	Q02487	Q14574;Q02487;Q14574-2;A0A3B3ISU0;Q02487-2;J3QRL9	DSC2_HUMAN	DSC2	Desmocollin-2	19.7466	19.7829	19.7127	19.196	18.9499	19.0043
+	3.35807	1.596	Q02790	Q02790;H0YFG2	FKBP4_HUMAN	FKBP4	Peptidyl-prolyl cis-trans isomerase FKBP4	21.1693	21.227	21.3655	19.6662	19.8926	19.415
+	0.962279	3.142	Q02809;Q02809-2	Q02809;Q02809-2;Q5JXB7;Q5JXB8	PLOD1_HUMAN	PLOD1	Procollagen-lysine,2-oxoglutarate 5-dioxygenase 1	18.0852	18.3889	18.6735	13.411	14.0538	18.2568
+	4.42352	0.631339	Q02880	Q02880;A0A8V8TPE3;A0A8V8TP20;A0A8V8TN33;E9PCY5;Q02880-2	TOP2B_HUMAN	TOP2B	DNA topoisomerase 2-beta	22.4907	22.4165	22.3843	21.7955	21.8069	21.7951
+	2.50514	0.383624	Q02978	Q02978;I3L1P8	M2OM_HUMAN	SLC25A11	Mitochondrial 2-oxoglutarate/malate carrier protein	18.5865	18.6287	18.724	18.3408	18.1867	18.2607
+	4.23228	0.811371	Q03001	Q03001;Q6P0N6;Q03001-3;Q03001-8;Q03001-9;F6QMI7;E7ETB9;F8W9J4;A0A7P0T890;Q5T0V7;Q03001-13;Q03001-14;E9PHM6;A0A494C1D7	DYST_HUMAN	DST	Dystonin	21.1913	21.2725	21.2713	20.3653	20.4441	20.4916
+	3.2924	3.86771	Q03111	Q03111	ENL_HUMAN	MLLT1	Protein ENL	19.1441	19.2075	18.6055	15.7116	15.0517	14.5906
+	3.56379	0.358854	Q03164;Q03164-2;Q03164-3	Q03164;Q03164-2;Q03164-3;A0A3B3ITT7;A0A8I5KQ03;A0A8I5KQV5;A0A8I5KY70;A0A8I5KXR3	KMT2A_HUMAN	KMT2A	Histone-lysine N-methyltransferase 2A	20.9834	21.028	21.0453	20.6137	20.6891	20.6773
+	0.800588	1.37426	Q03188	Q03188;Q03188-2;H0Y8J2	CENPC_HUMAN	CENPC	Centromere protein C	17.543	17.7736	17.9893	15.7551	17.9517	15.4763
+	1.29473	2.14601	Q03405;Q03405-3	Q03405;Q03405-3;M0R1I2	UPAR_HUMAN	PLAUR	Urokinase plasminogen activator surface receptor	18.7551	18.7118	18.4537	15.2058	16.4041	17.8727
+	2.39624	2.74234	Q03518;Q03518-2	Q03518;A0A140T9T7;Q03518-2;A0A8V8TN61;A0A8V8TNH0;A0A8V8TM76	TAP1_HUMAN	TAP1	Antigen peptide transporter 1	17.8742	17.7039	17.6114	15.4874	14.0794	15.3957
+	1.00117	-0.567362	Q04118	Q04118;A0A0G2JPD0;A0A0G2JNB4;F5H7C1	PRB3_HUMAN	PRB3	Basic salivary proline-rich protein 3	19.6747	19.504	18.9289	19.7256	20.2031	19.8809
+	2.36896	1.18599	Q04206;Q04206-2;Q04206-3;Q04206-4	Q04206;Q2TAM5;E9PKH5;Q04206-2;Q04206-3;Q04206-4;A0A087X0W8	TF65_HUMAN	RELA	Transcription factor p65	18.4734	18.2898	17.8892	17.2388	16.9733	16.8824
+	4.02291	2.01923	Q04637-4	Q04637;C9J6B6;C9JF13;A0A7I2Y1C3;Q04637-3;Q04637-4;Q04637-5;Q04637-6;Q04637-9	IF4G1_HUMAN	EIF4G1	Isoform of Q04637, Isoform C of Eukaryotic translation initiation factor 4 gamma 1	22.6884	22.589	22.7014	20.5951	20.8727	20.4533
+	3.74885	0.79509	Q04637-8	Q04637;E7EX73;E7EUU4;A0A7I2Y1C3;Q04637-3;Q04637-4;Q04637-5;Q04637-6;Q04637-7;Q04637-8;Q04637-9;E9PGM1	IF4G1_HUMAN	EIF4G1	Isoform of Q04637, Isoform 8 of Eukaryotic translation initiation factor 4 gamma 1	23.0102	22.971	22.9719	22.1344	22.1285	22.3049
+	1.4208	2.77884	Q04721	Q04721	NOTC2_HUMAN	NOTCH2	Neurogenic locus notch homolog protein 2	19.8203	17.1822	18.8922	14.954	16.0016	16.6026
+	2.21604	2.53574	Q04726;Q04726-2;Q04726-3;Q04726-4;Q04726-5;Q04726-6;Q04726-7	Q04726;H0YNT2;H0YLW9;H0YLI3;H0YKN8;H0YKT5;H0YKH0;H0YL70;Q04726-2;Q04726-3;Q04726-4;Q04726-5;Q04726-6;Q04726-7	TLE3_HUMAN	TLE3	Transducin-like enhancer protein 3	18.1991	17.7704	17.135	15.2915	15.7257	14.4802
+	2.64132	3.27306	Q04760;Q04760-2	Q04760;Q04760-2	LGUL_HUMAN	GLO1	Lactoylglutathione lyase	18.9276	18.5956	18.5544	15.0172	14.9084	16.3328
+	2.47331	4.65251	Q04912;Q04912-2;Q04912-7	Q04912;J3KQS7;Q04912-2;Q04912-5;Q04912-7	RON_HUMAN	MST1R	Macrophage-stimulating protein receptor	19.4425	19.4954	19.4311	14.055	16.2947	14.0619
+	2.16105	0.963908	Q04917	Q04917;A2IDB2	1433F_HUMAN	YWHAH	14-3-3 protein eta	19.4947	19.3796	19.579	18.1814	18.7911	18.5889
+	3.46662	4.12803	Q04941	Q04941	PLP2_HUMAN	PLP2	Proteolipid protein 2	18.8137	19.2885	19.477	14.5442	15.051	15.5999
+	2.90158	0.858049	Q05397;Q05397-5;Q05397-7	Q05397;E7ESA6;H0YBZ1;Q05397-2;Q05397-3;Q05397-5;Q05397-7;H0YBP1;H0YB16;E9PEI4;A0A8Q3WLM4	FAK1_HUMAN	PTK2	Focal adhesion kinase 1	19.9962	19.8865	19.6997	19.0725	19.0541	18.8817
+	3.2192	1.07572	Q05682-5	Q05682;C9J813;E7EX44;Q05682-2;Q05682-3;Q05682-4;Q05682-5;Q05682-6;E9PGZ1	CALD1_HUMAN	CALD1	Isoform of Q05682, Isoform 5 of Caldesmon	20.8073	20.657	20.8755	19.5332	19.8296	19.7499
+	1.68035	0.779111	Q05BV3;Q05BV3-5	Q05BV3;H0YJS1;Q05BV3-5	EMAL5_HUMAN	EML5	Echinoderm microtubule-associated protein-like 5	21.1972	21.3756	21.5368	20.7087	20.8382	20.2254
+	4.69667	1.03284	Q06124-1	Q06124;Q06124-1;Q06124-3;A0A8I5QJ58;A0A8I5QL30;A0A0U1RRI0;A0A1W2PPU4;A0A8I5KRZ3;A0A8I5KVS6;A0A8I5KW48	PTN11_HUMAN	PTPN11	Isoform of Q06124, Isoform 2 of Tyrosine-protein phosphatase non-receptor type 11	20.1717	20.1554	20.1296	19.0369	19.1424	19.1789
+	2.77635	0.880102	Q06210;Q06210-2	Q06210;A0A6I8PTT9;A0A6I8PRN4;Q06210-2	GFPT1_HUMAN	GFPT1	Glutamine--fructose-6-phosphate aminotransferase [isomerizing] 1	20.8525	20.8521	21.1395	19.9529	20.0647	20.1861
+	3.5596	1.63381	Q06323	Q06323;Q06323-2;Q06323-3	PSME1_HUMAN	PSME1	Proteasome activator complex subunit 1	20.3147	20.1782	20.225	18.4265	18.8583	18.5316
+	1.88593	0.399035	Q06587	Q06587;Q06587-2	RING1_HUMAN	RING1	E3 ubiquitin-protein ligase RING1	20.3156	20.2117	20.0001	19.7846	19.7538	19.792
+	3.53988	0.670227	Q06787-4	Q06787;Q06787-3;Q06787-4;Q06787-5;Q06787-6;Q06787-7;Q06787-10;A0A8I5KZ21	FMR1_HUMAN	FMR1	Isoform of Q06787, Isoform 3 of Fragile X messenger ribonucleoprotein 1	21.3629	21.3198	21.339	20.6029	20.6287	20.7795
+	4.408	1.03732	Q06787-8	Q06787;A8MQB8;G3V0J0;Q06787-2;Q06787-3;Q06787-4;Q06787-5;Q06787-6;Q06787-7;Q06787-8;Q06787-9;Q06787-10;Q06787-11;A0A8I5KS01;A0A8I5KTZ9;A0A8I5KTT6;A0A8I5KUC2;A0A8I5KT56;A0A8I5KWH0;A0A8I5KYA7;A0A8I5KZ21;A0A087WVL8;A0A087WXI3;A0A087WY29	FMR1_HUMAN	FMR1	Isoform of Q06787, Isoform 8 of Fragile X messenger ribonucleoprotein 1	24.28	24.2628	24.2554	23.1647	23.1895	23.332
+	2.30944	1.12076	Q06830	Q06830;A0A0A0MSI0	PRDX1_HUMAN	PRDX1	Peroxiredoxin-1	23.5047	23.4064	23.1878	22.5173	22.3028	21.9166
+	2.22443	0.87591	Q07021	Q07021;I3L3Q7;I3L3B0	C1QBP_HUMAN	C1QBP	Complement component 1 Q subcomponent-binding protein, mitochondrial	20.9658	20.6765	20.6059	19.6621	20.0846	19.8738
+	3.9609	0.845853	Q07065	Q07065	CKAP4_HUMAN	CKAP4	Cytoskeleton-associated protein 4	21.2053	21.1228	21.0588	20.3187	20.2109	20.3196
+	3.58979	0.798965	Q07157	Q07157;Q07157-2;G3V1L9;H0Y3R8;A0A0G2JNH2;G5E9E7;A0A087X0K9;A0A7I2V5U5	ZO1_HUMAN	TJP1	Tight junction protein ZO-1	20.2523	20.2632	20.1234	19.3922	19.505	19.3448
+	3.78059	0.565619	Q07666	Q07666;O75525;Q5VWX1;O75525-2;A0A6Q8PGH5;Q07666-2;Q07666-3	KHDR1_HUMAN	KHDRBS1	KH domain-containing, RNA-binding, signal transduction-associated protein 1	23.6284	23.7199	23.6128	23.0805	23.1336	23.0501
+	3.51263	1.05901	Q07820;Q07820-2	Q07820;Q07820-2	MCL1_HUMAN	MCL1	Induced myeloid leukemia cell differentiation protein Mcl-1	17.2965	17.3616	17.5198	16.4477	16.2352	16.3179
+	2.92499	0.963129	Q07866-4;Q07866-6;Q07866-7	Q07866;F8W6L3;G3V5R9;G3V3H3;G3V2E7;G5E9S8;Q07866-2;Q07866-3;Q07866-4;Q07866-5;Q07866-6;Q07866-7;Q07866-8;Q07866-9;Q07866-10;E7EVH7	KLC1_HUMAN	KLC1	Isoform of Q07866, Isoform J of Kinesin light chain 1	19.389	19.2267	19.2495	18.14	18.3307	18.5052
+	1.60452	2.32935	Q07889	Q07890;Q07889;A0A8I5QJ77;A0A8I5QJF3;Q07889-2;Q07890-2;C9K0N6;G5E9C8;A0A8I5KP47;A0A8I5KWL0	SOS1_HUMAN	SOS1	Son of sevenless homolog 1	18.0625	17.4388	17.5708	15.4589	14.2115	16.4136
+	2.26499	0.340913	Q07955	Q07955;J3KSW7;J3KTL2;Q07955-2;Q07955-3;J3QQV5	SRSF1_HUMAN	SRSF1	Serine/arginine-rich splicing factor 1	25.0709	25.1736	24.9824	24.7914	24.7154	24.6973
+	2.85185	1.47361	Q07960	Q07960;H0YE29	RHG01_HUMAN	ARHGAP1	Rho GTPase-activating protein 1	17.5217	17.2401	17.1273	15.9341	15.5336	16.0006
+	2.57014	0.44564	Q08170	Q13247;Q08170;Q13247-2;Q13247-3;A0A0D9SEM4;A0A590UJK4;A0A590UJP7;A0A590UK01;A0A590UK80	SRSF4_HUMAN	SRSF4	Serine/arginine-rich splicing factor 4	26.8228	26.8745	26.6652	26.386	26.3052	26.3344
+	2.91275	-0.791004	Q08211	Q08211	DHX9_HUMAN	DHX9	ATP-dependent RNA helicase A	24.5367	24.3727	24.5513	25.1955	25.2043	25.434
+	2.56264	2.38539	Q08378	Q08378;Q08378-2;A0A8I5QKX6;A0A8I5KQ98;A0A8I5KQH9;A0A8I5KSF0;A0A8I5KTE5;A0A8I5KXF8;A0A8I5KWY9	GOGA3_HUMAN	GOLGA3	Golgin subfamily A member 3	19.489	18.9954	19.624	16.6193	17.5944	16.7386
+	2.35276	0.482308	Q08379	Q08379;A0A6Q8KRG2;H0Y7B8;A0A8J9BZL8;A0A8I5KUW5	GOGA2_HUMAN	GOLGA2	Golgin subfamily A member 2	18.5147	18.5456	18.6038	18.2023	17.9289	18.086
+	3.78144	1.51621	Q08380	Q08380	LG3BP_HUMAN	LGALS3BP	Galectin-3-binding protein	19.9013	19.9743	20.2614	18.5244	18.5565	18.5074
+	3.12602	2.37374	Q08752	Q08752	PPID_HUMAN	PPID	Peptidyl-prolyl cis-trans isomerase D	18.3179	17.7976	18.2422	15.9094	15.9747	15.3523
+	2.58082	0.299539	Q08945	Q08945	SSRP1_HUMAN	SSRP1	FACT complex subunit SSRP1	26.2139	26.2364	26.2462	25.9891	25.8462	25.9625
+	1.0566	1.11284	Q08AF3	Q08AF3;Q08AF3-2;B4E128	SLFN5_HUMAN	SLFN5	Schlafen family member 5	20.4364	18.9643	18.9826	18.5048	18.2157	18.3242
+	0.981987	-1.20824	Q08AG7	Q08AG7	MZT1_HUMAN	MZT1	Mitotic-spindle organizing protein 1	16.4571	14.8012	16.3619	16.8504	16.892	17.5025
+	2.33652	2.99439	Q08AM6	Q08AM6;H3BUU8	VAC14_HUMAN	VAC14	Protein VAC14 homolog	17.9075	17.9968	18.2212	16.0281	14.2864	14.8278
+	2.48905	0.65369	Q08AN1	Q08AN1	ZN616_HUMAN	ZNF616	Zinc finger protein 616	20.6352	20.4569	20.3492	19.7036	19.895	19.8817
+	1.94788	0.560414	Q09028;Q09028-3	Q09028;Q09028-2;Q09028-3;Q09028-4	RBBP4_HUMAN	RBBP4	Histone-binding protein RBBP4	22.6099	22.5853	22.3684	21.9685	22.13	21.7839
+	2.86371	0.55249	Q09161	Q09161	NCBP1_HUMAN	NCBP1	Nuclear cap-binding protein subunit 1	20.2539	20.0492	20.2548	19.6068	19.6443	19.6493
+	4.37049	1.13317	Q09666	Q09666	AHNK_HUMAN	AHNAK	Neuroblast differentiation-associated protein AHNAK	25.6284	25.6787	25.655	24.4823	24.633	24.4474
+	4.51892	2.06849	Q0JRZ9	Q0JRZ9;Q0JRZ9-3	FCHO2_HUMAN	FCHO2	F-BAR domain only protein 2	19.7676	19.5351	19.8184	17.7296	17.5888	17.5972
+	3.41357	0.949455	Q0VDF9	Q0VDF9;H7C2A1	HSP7E_HUMAN	HSPA14	Heat shock 70 kDa protein 14	21.5241	21.4135	21.4584	20.6246	20.3599	20.5631
+	0.74814	2.97875	Q0VG06	Q0VG06;Q0VG06-3;F5GZS4;F5H095	FP100_HUMAN	FAAP100	Fanconi anemia core complex-associated protein 100	20.7363	20.6228	20.1958	16.0422	15.4133	21.1631
+	4.06258	1.1724	Q0ZGT2-2	Q0ZGT2;E7ETM8;E7EUA0;H7BXY5;Q0ZGT2-2;Q0ZGT2-3;Q0ZGT2-4	NEXN_HUMAN	NEXN	Isoform of Q0ZGT2, Isoform 2 of Nexilin	23.0548	23.0464	23.0465	21.8438	22.0159	21.7708
+	1.83837	1.69621	Q0ZGT2-3	Q0ZGT2;Q0ZGT2-3;Q0ZGT2-4	NEXN_HUMAN	NEXN	Isoform of Q0ZGT2, Isoform 3 of Nexilin	19.4613	19.4038	19.6434	17.4522	17.3542	18.6135
+	2.41362	1.01232	Q10567-3	Q10567;P63010;C9J1E7;Q10567-3;Q10567-4;Q10567-2;A0A087X253;A0A087WU93;A0A087WYD1;A0A087WZQ6;P63010-2;P63010-3	AP1B1_HUMAN	AP1B1	Isoform of Q10567, Isoform C of AP-1 complex subunit beta-1	18.7326	18.9524	19.2146	17.9499	17.7925	18.1204
+	1.89907	0.243919	Q10570	Q10570;A0A087X101	CPSF1_HUMAN	CPSF1	Cleavage and polyadenylation specificity factor subunit 1	20.8644	20.8343	20.944	20.6064	20.7279	20.5765
+	5.04651	1.43368	Q10589;Q10589-2	Q10589;Q10589-2	BST2_HUMAN	BST2	Bone marrow stromal antigen 2	21.3307	21.4647	21.4385	19.9755	19.9284	20.029
+	2.37387	0.82686	Q12768	Q12768	WASC5_HUMAN	WASHC5	WASH complex subunit 5	19.5444	19.6048	19.2105	18.7033	18.4871	18.6888
+	3.64454	0.589552	Q12769	Q12769;A0A8V8NBT1;G3V198;Q12769-2;E9PSI3;E9PR16;A0A8Q3WK58	NU160_HUMAN	NUP160	Nuclear pore complex protein Nup160	20.19	20.2081	20.2852	19.691	19.5683	19.6554
+	1.04745	1.22415	Q12774	Q12774;A0A2R8YFR7;A0A2R8YF49;H0Y895	ARHG5_HUMAN	ARHGEF5	Rho guanine nucleotide exchange factor 5	17.7854	17.6369	17.4056	15.3627	16.6072	17.1856
+	1.79113	0.405826	Q12788	Q12788	TBL3_HUMAN	TBL3	Transducin beta-like protein 3	20.0688	20.1504	20.2917	19.7074	19.6675	19.9186
+	2.16824	1.50703	Q12792	Q12792;Q12792-3;F8VRG3	TWF1_HUMAN	TWF1	Twinfilin-1	19.265	19.2444	19.6697	17.6141	18.4026	17.6414
+	2.66857	0.619614	Q12797	Q12797;Q12797-10	ASPH_HUMAN	ASPH	Aspartyl/asparaginyl beta-hydroxylase	22.9482	22.9207	22.7301	22.357	22.1877	22.1955
+	3.75355	0.840975	Q12802;Q12802-2;Q12802-4	Q12802;A8MYJ1;Q12802-2;Q12802-4;A0A087WTD7;A0A087WY36	AKP13_HUMAN	AKAP13	A-kinase anchor protein 13	19.9459	20.0499	19.8983	19.037	19.1749	19.1593
+	2.53783	0.601777	Q12857-3	Q12857;Q12857-2;Q12857-3;Q12857-4;A0A590UK38;A0A590UJU2;A0A590UK09;A0A8V8TQG7;A0A8V8TQI3;A0A8V8TQV0;A0A8V8TPG7;A0A8V8TPN0;A0A8V8TP49;B1AKN5;B1AKN6;B1AKN7;B1AKN8;S4R3K5;S4R3W2	NFIA_HUMAN	NFIA	Isoform of Q12857, Isoform 3 of Nuclear factor 1 A-type	20.0732	20.1588	20.0804	19.5862	19.5955	19.3255
+	4.69101	0.62443	Q12872;Q12872-2	Q12872;Q12872-2	SFSWA_HUMAN	SFSWAP	Splicing factor, suppressor of white-apricot homolog	21.5028	21.5561	21.5172	20.9086	20.8602	20.9341
+	2.20146	-0.351203	Q12873;Q12873-3	Q12873;A0A8V8TR54;Q12873-2;Q12873-3	CHD3_HUMAN	CHD3	Chromodomain-helicase-DNA-binding protein 3	21.6086	21.5903	21.4409	21.9414	21.9354	21.8167
+	2.65644	0.250109	Q12874	Q12874	SF3A3_HUMAN	SF3A3	Splicing factor 3A subunit 3	20.8244	20.9071	20.8322	20.6309	20.6263	20.5561
+	1.85156	-2.53047	Q12888;Q12888-2;Q12888-3	Q12888;Q12888-2;Q12888-3;A6NNK5;M0R142	TP53B_HUMAN	TP53BP1	TP53-binding protein 1	17.0538	15.5627	17.5907	19.2393	19.233	19.3264
+	2.35638	-0.395775	Q12894;Q12894-2	Q12894;A0A0R4J2F6;Q12894-2	IFRD2_HUMAN	IFRD2	Interferon-related developmental regulator 2	23.7936	23.8697	23.7191	24.2085	24.0909	24.2703
+	1.61659	0.401588	Q12899	Q12899	TRI26_HUMAN	TRIM26	Tripartite motif-containing protein 26	25.1135	25.1164	24.776	24.5753	24.6164	24.6093
+	5.12283	0.914733	Q12904	Q12904;A0A8C8MUD1;A0A8C8KIA0;Q12904-2;A0A804HJ47;A0A5F9ZHC5	AIMP1_HUMAN	AIMP1	Aminoacyl tRNA synthase complex-interacting multifunctional protein 1	22.7963	22.7934	22.7242	21.8959	21.8377	21.8362
+	2.31656	-0.235707	Q12905	Q12905;B4DY09	ILF2_HUMAN	ILF2	Interleukin enhancer-binding factor 2	24.4583	24.4429	24.5178	24.7312	24.6403	24.7547
+	1.5631	1.97864	Q12907	Q12907;D6RIU4;D6RBH1;D6RBV2;A0A8Q3WK65	LMAN2_HUMAN	LMAN2	Vesicular integral-membrane protein VIP36	17.0171	18.3889	18.4219	16.6622	15.518	15.7118
+	1.48144	1.50439	Q12913;Q12913-3	Q12913;A0A8V8TP51;Q12913-3	PTPRJ_HUMAN	PTPRJ	Receptor-type tyrosine-protein phosphatase eta	17.1481	17.0624	17.2294	15.918	14.7295	16.2793
+	2.79081	1.23439	Q12931	Q12931;Q12931-2;I3L239;I3L0K7	TRAP1_HUMAN	TRAP1	Heat shock protein 75 kDa, mitochondrial	22.9465	22.8711	23.3823	21.7666	21.8683	21.8619
+	1.52796	0.415475	Q12933;Q12933-3	Q12933;Q12933-2;Q12933-3;Q12933-4;B1AMX7;B1AMX8;B1AMY1	TRAF2_HUMAN	TRAF2	TNF receptor-associated factor 2	19.3573	19.3169	19.5541	19.0261	18.8036	19.1522
+	2.31802	0.592077	Q12948	Q12948	FOXC1_HUMAN	FOXC1	Forkhead box protein C1	18.4455	18.1653	18.4199	17.6522	17.8394	17.7628
+	4.48041	1.20513	Q12965	Q12965	MYO1E_HUMAN	MYO1E	Unconventional myosin-Ie	24.3368	24.2551	24.3093	23.0008	23.0992	23.1859
+	5.7874	0.393642	Q12986	Q12986;Q12986-2;Q12986-3	NFX1_HUMAN	NFX1	Transcriptional repressor NF-X1	22.9132	22.9423	22.9219	22.537	22.5282	22.5313
+	0.874429	2.04166	Q13002;Q13002-4	Q13002;F8WEZ8;Q13002-4;A0A804HIH6	GRIK2_HUMAN	GRIK2	Glutamate receptor ionotropic, kainate 2	19.5602	19.9772	20.2192	18.6694	19.2023	15.76
+	3.13669	0.841152	Q13011	Q13011;M0R248;M0QZW4	ECH1_HUMAN	ECH1	Delta(3,5)-Delta(2,4)-dienoyl-CoA isomerase, mitochondrial	19.7134	19.8583	19.9796	19.0553	19.0567	18.9159
+	2.59436	0.819341	Q13017;Q13017-2	Q13017;Q13017-2	RHG05_HUMAN	ARHGAP5	Rho GTPase-activating protein 5	19.0518	18.7447	18.666	17.968	18.0644	17.9722
+	1.71203	0.851609	Q13023	Q13023;G3V3H7;Q13023-2	AKAP6_HUMAN	AKAP6	A-kinase anchor protein 6	22.7494	22.5139	22.4914	22.0512	21.8109	21.3378
+	3.98398	-1.33659	Q13042	Q13042;Q13042-2;Q13042-3;Q13042-4;Q5T8C6;A0A3B3ISD2	CDC16_HUMAN	CDC16	Cell division cycle protein 16 homolog	19.2503	19.3315	19.0974	20.6689	20.5023	20.5179
+	4.69257	1.05946	Q13045	Q13045;Q13045-2;Q13045-3	FLII_HUMAN	FLII	Protein flightless-1 homolog	22.72	22.742	22.7702	21.6438	21.6391	21.771
+	1.71304	1.14469	Q13045-2	J3KS54;Q13045-2	FLII_HUMAN	FLII	Isoform of Q13045, Isoform 2 of Protein flightless-1 homolog	20.3243	20.3146	21.0728	19.1921	19.3324	19.7531
+	2.38548	1.01005	Q13049	Q13049	TRI32_HUMAN	TRIM32	E3 ubiquitin-protein ligase TRIM32	19.4885	19.234	19.8152	18.4789	18.564	18.4647
+	1.21815	0.381613	Q13084	Q13084;Q4TT37;A2IDC7;A2IDC6	RM28_HUMAN	MRPL28	39S ribosomal protein L28, mitochondrial	19.7799	19.5229	19.3197	19.1281	19.28	19.0695
+	5.44781	3.39581	Q13085	Q13085;Q13085-2;Q13085-3;Q13085-4;Q59FY4;A0A087WWN5	ACACA_HUMAN	ACACA	Acetyl-CoA carboxylase 1	27.3093	27.2684	27.0149	23.7933	23.7706	23.8412
+	1.59871	0.708272	Q13098;Q13098-5;Q13098-7	Q13098;J3KRJ4;J3KRE8;J3KSA5;J3KTB0;A0A096LP07;A0A096LPJ3;Q13098-5;Q13098-7;A8K070;C9JFE4;J3QL53;J3QLE8;J3QLT0;J3QS84;J3QS88	CSN1_HUMAN	GPS1	COP9 signalosome complex subunit 1	18.327	18.5984	18.9882	17.9644	18.0236	17.8008
+	2.15885	0.535583	Q13111	Q13111;Q13111-2;Q13111-3	CAF1A_HUMAN	CHAF1A	Chromatin assembly factor 1 subunit A	18.781	18.8306	18.4944	18.1724	18.1653	18.1615
+	1.53792	0.652306	Q13112	Q13112	CAF1B_HUMAN	CHAF1B	Chromatin assembly factor 1 subunit B	18.7849	18.7574	18.7141	17.9442	18.4864	17.8687
+	2.50551	0.632448	Q13123	Q13123;E7EQZ7;D6REL4	RED_HUMAN	IK	Protein Red	21.2812	21.2694	21.0757	20.6433	20.6566	20.4291
+	1.81696	0.705977	Q13131;Q13131-2	Q13131;Q13131-2	AAPK1_HUMAN	PRKAA1	5'-AMP-activated protein kinase catalytic subunit alpha-1	20.0736	20.0213	20.3028	19.4952	19.1385	19.646
+	3.6959	0.897364	Q13136	Q13136;A0A2R8Y7R9;Q13136-2	LIPA1_HUMAN	PPFIA1	Liprin-alpha-1	19.8117	19.83	19.6605	18.9272	18.8977	18.7852
+	2.13754	0.732569	Q13148	Q13148;K7EJ99;G3V162;A0A0A0MSV7;A0A0A0N0M3;B1AKP7;K7EJM5;K7EN94;A0A087X260;A0A087WX29;A0A087WYY0	TADBP_HUMAN	TARDBP	TAR DNA-binding protein 43	21.191	21.0439	21.1998	20.4374	20.6349	20.1647
+	5.29461	0.747234	Q13155	Q13155;A8MU58;Q13155-2	AIMP2_HUMAN	AIMP2	Aminoacyl tRNA synthase complex-interacting multifunctional protein 2	22.7831	22.734	22.8032	22.0254	22.0433	22.0099
+	0.892043	2.56673	Q13162	Q13162;H7C3T4	PRDX4_HUMAN	PRDX4	Peroxiredoxin-4	18.6754	19.1259	19.6672	18.8228	14.2853	16.6601
+	0.832762	1.37473	Q13177	Q13177	PAK2_HUMAN	PAK2	Serine/threonine-protein kinase PAK 2	18.595	18.1727	17.152	16.9259	17.4966	15.3729
+	2.75791	0.826549	Q13185	Q13185	CBX3_HUMAN	CBX3	Chromobox protein homolog 3	20.5764	20.466	20.6549	19.818	19.8528	19.5468
+	3.76378	0.788662	Q13200	Q13200;Q13200-2;Q13200-3	PSMD2_HUMAN	PSMD2	26S proteasome non-ATPase regulatory subunit 2	20.4085	20.5396	20.4677	19.7632	19.676	19.6106
+	2.43065	0.435205	Q13214;Q13214-2	Q13214;Q13214-2;A0A0C4DGV8	SEM3B_HUMAN	SEMA3B	Semaphorin-3B	22.2139	22.0381	22.2751	21.7324	21.7591	21.7301
+	1.03578	-1.40826	Q13219	Q13219	PAPP1_HUMAN	PAPPA	Pappalysin-1	17.6	16.0288	18.0955	18.3695	18.7962	18.7833
+	1.43202	1.69237	Q13228;Q13228-2;Q13228-4	Q13228;Q13228-2;Q13228-3;Q13228-4	SBP1_HUMAN	SELENBP1	Methanethiol oxidase	19.1017	18.9637	19.2225	18.0512	17.8382	16.3213
+	2.30766	0.462672	Q13242	Q13242	SRSF9_HUMAN	SRSF9	Serine/arginine-rich splicing factor 9	22.1285	21.9726	22.0342	21.5305	21.4982	21.7185
+	1.58335	0.287352	Q13247;Q13247-3	Q13247;Q13247-3;A0A590UJK4;A0A590UJP7;A0A590UK01;A0A590UK80	SRSF6_HUMAN	SRSF6	Serine/arginine-rich splicing factor 6	25.3448	25.5203	25.2502	25.1278	25.088	25.0374
+	1.80163	0.723422	Q13257	Q13257	MD2L1_HUMAN	MAD2L1	Mitotic spindle assembly checkpoint protein MAD2A	19.5155	19.5566	19.3492	18.684	19.069	18.498
+	3.78691	0.72272	Q13263	Q13263;Q13263-2	TIF1B_HUMAN	TRIM28	Transcription intermediary factor 1-beta	21.5291	21.6046	21.6464	20.8436	20.9493	20.8191
+	0.81954	2.10971	Q13277;Q13277-2;Q13277-3	Q13277;Q13277-2;Q13277-3;A0A286YF28;A0A0J9YW33;A0A0C4DGE4	STX3_HUMAN	STX3	Syntaxin-3	19.2961	19.4101	19.7033	15.0443	18.9627	18.0734
+	2.13216	0.591838	Q13283	Q13283;Q13283-2;A0A7P0P2U7;A0A7I2YQB1;A0A7I2YQN9;A0A7I2YQQ8;A0A7I2YQU8;E5RIF8;E5RJU8;E5RH42;A0A7I2V2S5;A0A7I2V533;A0A7I2V5M7;A0A7I2V651	G3BP1_HUMAN	G3BP1	Ras GTPase-activating protein-binding protein 1	24.6402	24.5603	24.3998	23.7751	23.9481	24.1016
+	1.10926	-0.808119	Q13310	Q13310;H0YEU6;A0A7I2V4V6;A0A7I2V5F4;A0A7I2V5W9	PABP4_HUMAN	PABPC4	Polyadenylate-binding protein 4	15.6549	16.0561	16.2081	16.8671	16.2235	17.2528
+	2.44646	0.529122	Q13310-3	Q13310;H0YEU6;H0Y5F5;Q13310-2;Q13310-3;B1ANR0;A0A7I2V4L7;A0A7I2V598;A0A7I2V5W9	PABP4_HUMAN	PABPC4	Isoform of Q13310, Isoform 3 of Polyadenylate-binding protein 4	24.8285	24.6694	24.7806	24.1316	24.1885	24.371
+	0.917423	1.14087	Q13315	Q13315	ATM_HUMAN	ATM	Serine-protein kinase ATM	18.9852	18.1674	17.1038	17.0612	16.552	17.2206
+	2.1219	-0.314737	Q13347	Q13347;A0A7P0MRT9;Q5TFK1;A0A7I2YQF8;A0A7I2YQN1;A0A7I2YQI2;A0A7I2YQI6;A0A7I2YQP9;A0A7I2YQU2;A0A7I2YQX4;A0A7I2V2M3;A0A7I2V391;A0A7I2V3K6;A0A7I2V3N2;A0A7I2V3T4;A0A7I2V3U3;A0A7I2V4C2;A0A7I2V4S8;A0A7I2V5E4;A0A7I2V607;A0A7I2V613;A0A7I2V5V8;A0A7I2V685;A0A7I2V640	EIF3I_HUMAN	EIF3I	Eukaryotic translation initiation factor 3 subunit I	25.1444	25.148	25.0591	25.4182	25.535	25.3425
+	1.96631	-2.07701	Q13362;Q13362-5	Q13362;H0YJU0;A0A8Q3WKR3;Q96B13;Q13362-2;Q13362-3;Q13362-4;Q13362-5	2A5G_HUMAN	PPP2R5C	Serine/threonine-protein phosphatase 2A 56 kDa regulatory subunit gamma isoform	16.0925	15.9773	14.7453	17.3819	17.7164	17.9477
+	1.8684	0.574787	Q13393-2	Q13393;Q13393-2;Q13393-4	PLD1_HUMAN	PLD1	Isoform of Q13393, Isoform PLD1B of Phospholipase D1	20.5962	20.6533	20.9395	20.038	20.1051	20.3216
+	4.40552	4.55486	Q13404	Q13404;G3V2F7;Q13404-1;Q13404-2;Q13404-6;Q13404-7;I3L0A0	UB2V1_HUMAN	UBE2V1	Ubiquitin-conjugating enzyme E2 variant 1	19.5775	18.9114	19.3509	14.7204	14.513	14.9418
+	4.09338	1.06458	Q13409;Q13409-2;Q13409-3;Q13409-7	Q13409;Q13409-2;Q13409-3;Q13409-5;Q13409-6;Q13409-7	DC1I2_HUMAN	DYNC1I2	Cytoplasmic dynein 1 intermediate chain 2	19.758	19.8416	19.8865	18.6867	18.865	18.7406
+	4.41264	0.735231	Q13415	Q13415	ORC1_HUMAN	ORC1	Origin recognition complex subunit 1	21.6264	21.5281	21.5347	20.842	20.8521	20.7894
+	3.77033	0.812422	Q13416	Q13416;B8ZZ80	ORC2_HUMAN	ORC2	Origin recognition complex subunit 2	22.1456	22.1593	22.2494	21.3702	21.4602	21.2866
+	2.79505	0.535373	Q13418	Q13418;A0A0A0MTH3	ILK_HUMAN	ILK	Integrin-linked protein kinase	19.5764	19.7262	19.7463	19.0855	19.2365	19.1207
+	3.61087	1.35069	Q13421-2;Q13421-3;Q13421-4	Q13421;H3BUX1;H3BR90;H3BMA1;Q13421-2;Q13421-3;Q13421-4	MSLN_HUMAN	MSLN	Isoform of Q13421, Isoform 3 of Mesothelin	20.4909	20.4235	20.4976	18.9263	19.2937	19.1399
+	2.72054	0.962214	Q13425	Q13425;A0A140TA73;Q13425-2	SNTB2_HUMAN	SNTB2	Beta-2-syntrophin	19.548	19.6254	19.6454	18.6321	18.8732	18.4268
+	3.66253	0.539897	Q13428-3	Q13428;Q13428-2;Q13428-3;Q13428-4;Q13428-5;Q13428-6;Q13428-7;Q13428-8;E7ETY2;H0Y8Y7;A0A6I8PRA0;A0A3B3IS06	TCOF_HUMAN	TCOF1	Isoform of Q13428, Isoform 3 of Treacle protein	22.6454	22.7277	22.6636	22.1629	22.1826	22.0716
+	3.60219	0.559855	Q13435	Q13435;H0YEX5;E9PPJ0	SF3B2_HUMAN	SF3B2	Splicing factor 3B subunit 2	23.5698	23.6236	23.4943	23.0256	23.0311	22.9514
+	2.08939	0.530288	Q13459	Q13459;M0R0P8;M0R300;Q13459-2	MYO9B_HUMAN	MYO9B	Unconventional myosin-IXb	19.953	20.1696	19.9651	19.4482	19.3878	19.6608
+	1.75948	0.711133	Q13470;Q13470-2	Q13470;Q13470-2	TNK1_HUMAN	TNK1	Non-receptor tyrosine-protein kinase TNK1	18.9753	18.8546	18.7812	18.2061	18.4324	17.8391
+	2.36002	-1.86502	Q13472;Q13472-2	Q13472;Q13472-2;Q13472-3	TOP3A_HUMAN	TOP3A	DNA topoisomerase 3-alpha	15.6184	14.7881	15.8266	17.3727	17.2138	17.2415
+	2.35107	0.576248	Q13492;Q13492-2;Q13492-3;Q13492-5	Q13492;E9PLJ8;E9PKP6;E9PI56;Q13492-2;Q13492-3;Q13492-4;Q13492-5	PICAL_HUMAN	PICALM	Phosphatidylinositol-binding clathrin assembly protein	19.4767	19.62	19.6373	19.0944	18.8304	19.0804
+	3.06995	-0.550001	Q13501	Q13501;C9J6J8;D6RBF1;E3W990;E7EMC7	SQSTM_HUMAN	SQSTM1	Sequestosome-1	22.5455	22.5167	22.3753	23.0011	22.9945	23.0919
+	1.91295	0.352973	Q13509	Q13509;G3V2A3;Q13509-2;A0A0B4J269	TBB3_HUMAN	TUBB3	Tubulin beta-3 chain	19.6235	19.6388	19.5414	19.3594	19.1043	19.281
+	1.81488	0.307861	Q13523	Q13523;H0YDJ3	PRP4B_HUMAN	PRPF4B	Serine/threonine-protein kinase PRP4 homolog	20.7988	20.9577	20.8312	20.5989	20.626	20.4392
+	2.02968	0.575708	Q13547	Q13547;Q5TEE2	HDAC1_HUMAN	HDAC1	Histone deacetylase 1	19.8097	19.7836	19.7821	19.053	19.4555	19.1399
+	2.77036	1.18255	Q13555-6;Q13555-8	Q13555;Q8WU40;A0A804CJ50;H0Y6G2;Q5SWX3;Q13555-3;Q13555-4;Q13555-5;Q13555-6;Q13555-2;Q13555-7;Q13555-8;Q13555-9;A0A8V8TQ77;Q13555-10;Q13555-11;A0A2Q3DQE3	KCC2G_HUMAN	CAMK2G	Isoform of Q13555, Isoform 6 of Calcium/calmodulin-dependent protein kinase type II subunit gamma	20.4177	20.2805	20.0943	18.9564	18.9529	19.3356
+	1.13312	1.27561	Q13557;Q13557-10;Q13557-11;Q13557-12;Q13557-6;Q13557-8	Q13557;E9PBG7;H0Y9J2;D6R938;Q13557-3;Q13557-4;Q13557-5;Q13557-6;Q13557-8;Q13557-9;Q13557-10;Q13557-11;Q13557-12;A0A8V8TPJ8;A0A8V8TPK3;A0A8V8TPY4;E9PF82;A0A8V8TN60;A0A8V8TN65;A0A8V8TN88;A0A8V8TNA1;A0A8V8TNA7;A0A8V8TND4	KCC2D_HUMAN	CAMK2D	Calcium/calmodulin-dependent protein kinase type II subunit delta	19.576	19.4684	19.2458	18.5855	17.1185	18.7594
+	2.93717	1.15079	Q13561;Q13561-2;Q13561-3	Q13561;F8VW18;F8VRV7;F8W0U6;F8W1I6;Q13561-2;Q13561-3;A0A7I2V390;A0A7I2V2Z2;A0A7I2V4H4	DCTN2_HUMAN	DCTN2	Dynactin subunit 2	20.4683	20.4511	20.8359	19.316	19.5007	19.4862
+	0.910795	-2.17752	Q13569	Q13569;G8JL98;H0YH18;B4E127;F5H0I7	TDG_HUMAN	TDG	G/T mismatch-specific thymine DNA glycosylase	15.0478	15.5253	18.5496	18.6607	18.8461	18.1484
+	2.82977	0.676893	Q13573	Q13573;G3V4X8;G3V3A4	SNW1_HUMAN	SNW1	SNW domain-containing protein 1	21.3012	21.2027	21.0677	20.404	20.5718	20.565
+	0.94355	-0.745724	Q13574-3	Q13574;Q13574-1;Q13574-3;Q13574-4;Q13574-5;Q13574-6;Q13574-7;E9PNL8	DGKZ_HUMAN	DGKZ	Isoform of Q13574, Isoform 3 of Diacylglycerol kinase zeta	16.8308	16.8278	17.8786	17.8992	17.7313	18.1439
+	2.99711	0.59013	Q13576	Q13576;Q13576-2;Q13576-3;F5H7S7	IQGA2_HUMAN	IQGAP2	Ras GTPase-activating-like protein IQGAP2	21.8101	21.9298	21.8444	21.196	21.2309	21.387
+	2.08039	0.412481	Q13595	Q13595;Q13595-2;Q13595-3;Q13595-4	TRA2A_HUMAN	TRA2A	Transformer-2 protein homolog alpha	22.6018	22.7474	22.6026	22.3774	22.1767	22.1602
+	0.785518	2.61513	Q13596;Q13596-2;Q13596-3	Q13596;H0YK43;Q13596-2;Q13596-3	SNX1_HUMAN	SNX1	Sorting nexin-1	18.1806	17.8097	18.5289	18.2857	13.0244	15.3638
+	3.17923	0.648425	Q13601	Q13601;Q13601-2	KRR1_HUMAN	KRR1	KRR1 small subunit processome component homolog	22.9439	22.9703	23.0471	22.3866	22.4102	22.2192
+	3.50606	0.932269	Q13610	Q13610;B4DJV5	PWP1_HUMAN	PWP1	Periodic tryptophan protein 1 homolog	24.9879	24.9815	24.8242	24.0386	24.0764	23.8817
+	2.20925	0.712111	Q13613	Q13613;F8WA39;Q8NEC6;H0YDX3;E9PIH9;Q13613-2	MTMR1_HUMAN	MTMR1	Myotubularin-related protein 1	17.8518	18.0692	17.8053	17.325	16.9828	17.2822
+	1.4204	0.851554	Q13614	Q13614;A0A6Q8PGS5;A0A6Q8PHS7;C9JEX3;Q13614-2	MTMR2_HUMAN	MTMR2	Myotubularin-related protein 2	19.8568	20.4996	20.7056	19.5353	19.2941	19.6779
+	1.40912	1.70086	Q13618;Q13618-2	Q13618;H7C1L6;Q13618-2	CUL3_HUMAN	CUL3	Cullin-3	17.8137	17.6827	18.7523	15.5468	16.5081	17.0912
+	4.40051	0.874389	Q13619	Q13619;A0A087WWN2	CUL4A_HUMAN	CUL4A	Cullin-4A	21.4682	21.4913	21.5449	20.5824	20.5954	20.7034
+	1.87531	0.454299	Q13625;Q13625-2;Q13625-3	Q13625;Q13625-2;Q13625-3	ASPP2_HUMAN	TP53BP2	Apoptosis-stimulating of p53 protein 2	17.793	17.6139	17.8943	17.4509	17.2347	17.2528
+	2.93516	0.736486	Q13724	Q13724;Q13724-2;A0A3B3IS52;A0A3B3IRW2;A0A3B3IRK6;A0A8I5KTK5	MOGS_HUMAN	MOGS	Mannosyl-oligosaccharide glucosidase	20.3394	20.4601	20.5968	19.6338	19.7578	19.7954
+	6.01208	1.31663	Q13813	Q13813;A0A0D9SGF6;A0A0D9SF54;Q13813-2;Q13813-3	SPTN1_HUMAN	SPTAN1	Spectrin alpha chain, non-erythrocytic 1	22.3195	22.2662	22.2464	20.9667	20.983	20.9324
+	0.829459	1.77735	Q13825;Q13825-2	Q13825;Q13825-2	AUHM_HUMAN	AUH	Methylglutaconyl-CoA hydratase, mitochondrial	18.0604	18.2807	18.6394	14.8101	18.1976	16.6407
+	1.68078	0.521992	Q13838;Q13838-2	Q13838;F6QYI9;F6R6M7;Q13838-2;F6WLT2;F6S4E6;Q5STU3;A0A140T9X3;A0A140T9X9;A0A140T9K1;A0A140T9K2;A0A140T9L4;A0A140T9N3;A0A140T973;A0A140T996;A0A0A0MT12;A0A140TA18;F6UJC5;F6TRA5;A0A0G2JJZ9;A0A0G2JJL7	DX39B_HUMAN	DDX39B	Spliceosome RNA helicase DDX39B	20.6953	20.5827	20.3267	19.9357	19.9115	20.1915
+	2.28443	-2.98281	Q13884;Q13884-2	Q13884;Q13884-2;A0A3B3ITC2	SNTB1_HUMAN	SNTB1	Beta-1-syntrophin	14.5733	16.4193	15.2694	18.4359	18.3985	18.3759
+	2.17938	0.487195	Q13885	P07437;Q13885;Q9BVA1;Q13509;Q5JP53;G3V5W4;G3V3R4;G3V2N6;G3V2R8;A0A0B4J269	TBB2A_HUMAN	TUBB2A	Tubulin beta-2A chain	19.5424	19.6654	19.7524	19.139	19.0579	19.3017
+	1.83094	0.677052	Q13887	Q13887;Q13887-4	KLF5_HUMAN	KLF5	Krueppel-like factor 5	19.2686	19.5565	19.5838	18.9423	18.9025	18.5328
+	5.95084	-1.44437	Q13895	Q13895	BYST_HUMAN	BYSL	Bystin	22.8213	22.8427	22.7831	24.2692	24.2139	24.2971
+	4.03316	1.03075	Q14008;Q14008-3	Q14008;H0YDX5;Q14008-2;Q14008-3	CKAP5_HUMAN	CKAP5	Cytoskeleton-associated protein 5	22.3846	22.3615	22.2087	21.3121	21.3309	21.2196
+	1.98647	0.480496	Q14011	Q14011;D6W5Y5;K7EJV1;K7EJV5;K7ELT6;K7ELV6;K7EMY9;K7ENX8;K7EPM4;K7ER40;K7EQR7;Q14011-2	CIRBP_HUMAN	CIRBP	Cold-inducible RNA-binding protein	19.957	19.8505	19.9346	19.381	19.6273	19.2923
+	3.3836	2.87035	Q14019	Q14019;H3BT58	COTL1_HUMAN	COTL1	Coactosin-like protein	18.1693	17.9195	18.0339	14.6613	15.4548	15.3955
+	5.45223	0.539872	Q14103;Q14103-3	Q14103;H0YA96;H0Y8G5;Q14103-2;Q14103-3;Q14103-4	HNRPD_HUMAN	HNRNPD	Heterogeneous nuclear ribonucleoprotein D0	21.9419	21.9273	21.9438	21.3723	21.4207	21.4004
+	1.94843	0.383048	Q14119	Q14119;J9JIC7;J3QSH4	VEZF1_HUMAN	VEZF1	Vascular endothelial zinc finger 1	21.1818	21.0631	21.2212	20.8682	20.6318	20.8169
+	4.19393	1.32147	Q14126	Q14126;A0A804HJ09	DSG2_HUMAN	DSG2	Desmoglein-2	24.7777	24.9051	24.9601	23.4529	23.6176	23.608
+	3.74333	0.872519	Q14134	Q14134;E9PRL4;Q14134-2	TRI29_HUMAN	TRIM29	Tripartite motif-containing protein 29	21.824	21.8885	21.8324	21.0861	20.9697	20.8716
+	3.02293	0.396302	Q14137	Q14137;Q14137-2	BOP1_HUMAN	BOP1	Ribosome biogenesis protein BOP1	21.3221	21.3359	21.4494	21.0128	20.9425	20.9632
+	3.63706	-4.8262	Q14140	Q14140	SRTD2_HUMAN	SERTAD2	SERTA domain-containing protein 2	15.322	16.0426	16.5591	20.9844	20.885	20.5329
+	3.5129	1.13878	Q14141;Q14141-2;Q14141-4	Q14141;Q14141-2;Q14141-3;Q14141-4;B1AMS2	SEPT6_HUMAN	SEPTIN6	Septin-6	19.9548	20.0476	19.8939	18.8548	18.6645	18.9607
+	1.49933	-0.304693	Q14152	Q14152;Q14152-2	EIF3A_HUMAN	EIF3A	Eukaryotic translation initiation factor 3 subunit A	26.0311	26.0671	25.8087	26.2091	26.3677	26.2443
+	3.71108	1.02471	Q14155-1	Q14155;E7EUY6;A0A2R8YG42;A0A8V8TQ72;F6SJA5;B1ALK7;E9PDQ5;Q14155-1;Q14155-2;Q14155-3;Q14155-5;Q14155-6	ARHG7_HUMAN	ARHGEF7	Isoform of Q14155, Isoform 1 of Rho guanine nucleotide exchange factor 7	20.5141	20.4295	20.3855	19.5547	19.3426	19.3577
+	3.97488	1.33233	Q14156	Q14156;A0A1B0GUZ7;Q14156-2;Q14156-3;E5RJS1	EFR3A_HUMAN	EFR3A	Protein EFR3 homolog A	21.2346	21.2129	21.2601	19.76	19.8935	20.0571
+	4.98664	0.861776	Q14157-1	Q14157;F8W726;Q14157-1;Q14157-3;Q14157-4;Q14157-5	UBP2L_HUMAN	UBAP2L	Isoform of Q14157, Isoform 2 of Ubiquitin-associated protein 2-like	25.0751	25.0772	25.0423	24.2194	24.2434	24.1464
+	2.33688	0.31857	Q14157;Q14157-5	Q14157;H0Y5H6;Q14157-5	UBP2L_HUMAN	UBAP2L	Ubiquitin-associated protein 2-like	22.5967	22.6592	22.5261	22.3549	22.2464	22.225
+	3.27476	0.967927	Q14160	Q14160;Q14160-2;Q14160-3;H0YCG0;A0A0G2JNZ2;A0A0G2JPP5;A0A0G2JMS7;A0A669KB89	SCRIB_HUMAN	SCRIB	Protein scribble homolog	21.94	21.9992	22.1906	20.9736	21.1751	21.0773
+	0.868389	1.44347	Q14161	Q14161;Q14161-2;Q14161-3;Q14161-4;Q14161-5;Q14161-6;Q14161-7;Q14161-8;Q14161-9;F8VXI9;F8W822;Q14161-10;Q14161-11;R4GNG3	GIT2_HUMAN	GIT2	ARF GTPase-activating protein GIT2	18.805	18.3879	17.7341	18.237	16.484	15.8757
+	1.34071	1.01835	Q14165	Q14165;F5GX14;F5H1S8	MLEC_HUMAN	MLEC	Malectin	16.2066	16.7873	16.6962	16.0046	14.965	15.6655
+	1.55187	0.665741	Q14181	Q14181;A0A3B3ITS5	DPOA2_HUMAN	POLA2	DNA polymerase alpha subunit B	18.9831	18.8021	19.0068	18.1951	17.9822	18.6176
+	5.08766	1.71341	Q14185	Q14185;A0A096LNH6	DOCK1_HUMAN	DOCK1	Dedicator of cytokinesis protein 1	19.5144	19.4549	19.5116	17.7379	17.7129	17.89
+	1.9991	0.758273	Q14192	Q14192	FHL2_HUMAN	FHL2	Four and a half LIM domains protein 2	19.859	19.6927	20.2006	19.2941	19.0638	19.1196
+	1.34518	1.4692	Q14202	Q14202;A6NHB5;Q14202-2	ZMYM3_HUMAN	ZMYM3	Zinc finger MYM-type protein 3	16.3332	16.2774	17.7216	15.6966	15.1149	15.1132
+	3.38845	1.12439	Q14203-3	Q14203;E7EX90;C9JZA4;C9JTE5;C9JJN7;C9JKG6;Q6AWB1;C9JJD0;A0A804CDA6;A0A7P0Z4C3;E9PCY0;Q14203-3;Q14203-4;Q14203-6	DCTN1_HUMAN	DCTN1	Isoform of Q14203, Isoform 3 of Dynactin subunit 1	21.814	21.8965	22.1408	20.8468	20.761	20.8703
+	4.25405	1.12556	Q14204	Q14204;A0A2R8Y706;A0A2R8Y6H2;A0A2R8Y5T0;A0A2R8YGC7;A0A2R8YFZ7;A0A7P0T9F1;A0A7P0T9K2;A0A7P0T9R4;A0A7P0T9S3;A0A7P0T9Y3;A0A7P0T916;A0A7P0T8N2;A0A7P0T942;A0A7P0T934;A0A7P0T8W5;A0A7P0T990;A0A7P0T9C4;A0A7P0T825;A0A7P0T7V5;A0A7P0TAW9;A0A7P0TAV5;A0A7P0TB64;A0A7P0TB75;A0A7P0TBC9;A0A7P0TBJ7;A0A7P0TAF3;A0A7P0TAM4;A0A7P0TA13;A0A804HHY6	DYHC1_HUMAN	DYNC1H1	Cytoplasmic dynein 1 heavy chain 1	22.4882	22.5979	22.5984	21.3952	21.3761	21.5365
+	6.1619	-1.59263	Q14241	Q14241	ELOA1_HUMAN	ELOA	Elongin-A	20.2438	20.2124	20.2498	21.7744	21.8493	21.8601
+	3.50129	0.680054	Q14244	Q14244;Q14244-3;Q14244-5;Q14244-6;Q14244-7;A0A087WZ40	MAP7_HUMAN	MAP7	Ensconsin	22.836	22.8876	22.7601	22.1696	22.2134	22.0606
+	2.92746	1.29286	Q14247	Q14247;Q14247-2;Q14247-3	SRC8_HUMAN	CTTN	Src substrate cortactin	22.7104	22.5239	22.7237	21.0899	21.4129	21.5766
+	3.1686	1.13137	Q14254	Q14254;E7EMK3;J3QLD9	FLOT2_HUMAN	FLOT2	Flotillin-2	21.7493	21.8753	21.9341	20.5541	20.694	20.9165
+	2.40998	0.560642	Q14257;Q14257-2	Q14257;A8MXP8;Q14257-2	RCN2_HUMAN	RCN2	Reticulocalbin-2	21.9988	21.9025	21.8604	21.4786	21.4036	21.1975
+	3.05575	0.874126	Q14258	Q14258;A0A3B3IUA7	TRI25_HUMAN	TRIM25	E3 ubiquitin/ISG15 ligase TRIM25	20.8194	20.779	20.5398	19.8727	19.7493	19.8937
+	1.32833	0.561037	Q14318-2	Q14318-2;M0R2Q6;M0R2K9	FKBP8_HUMAN	FKBP8	Isoform of Q14318, Isoform 2 of Peptidyl-prolyl cis-trans isomerase FKBP8	17.8198	17.8773	18.3435	17.442	17.2716	17.644
+	2.84565	1.02058	Q14331	Q14331;E9PRR7	FRG1_HUMAN	FRG1	Protein FRG1	24.3022	24.505	24.0592	23.2755	23.2339	23.2953
+	3.14296	1.00805	Q14344	Q14344;Q14344-2	GNA13_HUMAN	GNA13	Guanine nucleotide-binding protein subunit alpha-13	21.3688	21.4663	21.5927	20.4086	20.6368	20.3582
+	1.78882	0.590801	Q14432	Q14432	PDE3A_HUMAN	PDE3A	cGMP-inhibited 3',5'-cyclic phosphodiesterase 3A	18.9156	18.6959	18.7471	18.0563	18.0699	18.46
+	4.55876	1.27143	Q14444;Q14444-2	Q14444;G3V153;E9PLA9;Q14444-2	CAPR1_HUMAN	CAPRIN1	Caprin-1	24.9014	24.9158	25.072	23.7048	23.7225	23.6476
+	3.04133	1.66459	Q14493	Q14493;F8W8D3;H7C4H8	SLBP_HUMAN	SLBP	Histone RNA hairpin-binding protein	19.2339	19.1662	19.0367	17.2824	17.3214	17.8393
+	3.02257	0.493308	Q14498-2	Q14498;Q14498-2;G3XAC6;Q5QP22;Q5QP23	RBM39_HUMAN	RBM39	Isoform of Q14498, Isoform 2 of RNA-binding protein 39	25.4427	25.4213	25.3577	24.8751	24.8527	25.014
+	3.16577	-0.502386	Q14527	Q14527;A0A0C4DGA6	HLTF_HUMAN	HLTF	Helicase-like transcription factor	22.3221	22.4224	22.2769	22.8753	22.8718	22.7814
+	4.29494	0.978744	Q14554	Q14554	PDIA5_HUMAN	PDIA5	Protein disulfide-isomerase A5	19.9073	19.8762	19.7538	18.8435	18.9168	18.8408
+	3.77886	0.635184	Q14562	Q14562	DHX8_HUMAN	DHX8	ATP-dependent RNA helicase DHX8	21.7575	21.8743	21.7227	21.1644	21.1465	21.138
+	3.5513	0.765194	Q14566	Q14566	MCM6_HUMAN	MCM6	DNA replication licensing factor MCM6	20.4396	20.3267	20.2547	19.5097	19.5876	19.628
+	1.92928	2.35669	Q14571	Q14571;Q14571-2	ITPR2_HUMAN	ITPR2	Inositol 1,4,5-trisphosphate receptor type 2	25.6668	25.3993	26.6415	23.5998	24.1778	22.8598
+	2.73589	-2.72801	Q14624;Q14624-2;Q14624-3;Q14624-4	Q14624;B7ZKJ8;Q14624-2;Q14624-3;Q14624-4	ITIH4_HUMAN	ITIH4	Inter-alpha-trypsin inhibitor heavy chain H4	15.7573	15.2677	15.8728	18.2055	18.9799	17.8964
+	0.798838	2.37478	Q14642	Q14642;Q5T1B5;H0Y2W5	I5P1_HUMAN	INPP5A	Inositol polyphosphate-5-phosphatase A	18.8579	19.0875	19.0569	14.0011	17.247	18.6299
+	2.47035	0.603792	Q14644	Q14644;Q14644-2	RASA3_HUMAN	RASA3	Ras GTPase-activating protein 3	18.2458	18.2511	18.5387	17.7299	17.7428	17.7516
+	1.09839	-1.41733	Q14669-3	A0A6Q8PGG9;A0A6Q8PHK0;Q14669-3;C9JLD7;G5E9G6	TRIPC_HUMAN	TRIP12	Isoform of Q14669, Isoform 3 of E3 ubiquitin-protein ligase TRIP12	14.7602	15.6543	16.8453	17.0962	17.2847	17.1309
+	3.64209	0.656347	Q14671	Q14671;H0YEH2;H0YDK8;Q5T1Z4;Q5T1Z8;E9PR38;Q14671-2;Q14671-3;Q14671-4	PUM1_HUMAN	PUM1	Pumilio homolog 1	22.9327	23.0149	22.847	22.2522	22.3129	22.2604
+	1.13764	3.98387	Q14671-2;Q14671-3	H0YDK8;H0YC97;Q5T1Z4;Q5T1Z8;Q14671-2;Q14671-3	PUM1_HUMAN	PUM1	Isoform of Q14671, Isoform 2 of Pumilio homolog 1	20.6866	20.9657	21.2077	15.2253	15.4359	20.2472
+	3.48045	0.505018	Q14674	Q14674;Q14674-2	ESPL1_HUMAN	ESPL1	Separin	19.7717	19.6991	19.8437	19.2453	19.2932	19.2609
+	1.62453	0.461718	Q14676;Q14676-3	Q14676;Q14676-2;Q14676-3;Q14676-4	MDC1_HUMAN	MDC1	Mediator of DNA damage checkpoint protein 1	18.5844	18.4188	18.7692	18.2774	17.9963	18.1136
+	4.10138	0.735367	Q14677-3	Q14677;Q14677-2;Q14677-3	EPN4_HUMAN	CLINT1	Isoform of Q14677, Isoform 3 of Clathrin interactor 1	21.9999	22.052	21.9843	21.2564	21.2205	21.3531
+	3.13827	0.705976	Q14680	Q14680;A0A0D9SGI4;Q14680-2;Q14680-7;Q14680-8	MELK_HUMAN	MELK	Maternal embryonic leucine zipper kinase	20.1677	20.0213	19.934	19.2703	19.3696	19.3652
+	4.30697	1.23029	Q14683	Q14683;A0A6Q8PHC3;G8JLG1	SMC1A_HUMAN	SMC1A	Structural maintenance of chromosomes protein 1A	21.6425	21.6035	21.4964	20.3988	20.4017	20.251
+	2.79805	0.305243	Q14684	Q14684;Q14684-2	RRP1B_HUMAN	RRP1B	Ribosomal RNA processing protein 1 homolog B	22.156	22.1872	22.0636	21.8076	21.8244	21.8589
+	2.52805	0.649629	Q14689;Q14689-6	Q14689;A0A494C143;Q14689-2;Q14689-3;Q14689-4;Q14689-6	DIP2A_HUMAN	DIP2A	Disco-interacting protein 2 homolog A	21.3452	21.4625	21.2791	20.6365	20.6188	20.8826
+	3.73711	0.412437	Q14690	Q14690;A0A3B3IUD7	RRP5_HUMAN	PDCD11	Protein RRP5 homolog	22.0996	22.0949	22.066	21.6331	21.6595	21.7306
+	2.75856	0.495509	Q14694	Q14694;Q14694-2;Q14694-3	UBP10_HUMAN	USP10	Ubiquitin carboxyl-terminal hydrolase 10	23.4737	23.3862	23.2696	22.8688	22.835	22.9392
+	0.861118	-1.70057	Q14696	Q14696	MESD_HUMAN	MESD	LRP chaperone MESD	16.066	18.8346	16.1018	18.717	18.7776	18.6094
+	3.301	1.07859	Q14697	Q14697;Q14697-2;F5H6X6	GANAB_HUMAN	GANAB	Neutral alpha-glucosidase AB	21.5526	21.5197	21.3333	20.2795	20.5437	20.3466
+	4.04624	1.02589	Q14738	Q14738;E9PFR3;Q14738-2	2A5D_HUMAN	PPP2R5D	Serine/threonine-protein phosphatase 2A 56 kDa regulatory subunit delta isoform	19.7571	19.819	19.6592	18.6616	18.6897	18.8064
+	1.36368	0.594229	Q14739	Q14739;C9JXK0;A0A494C1L1	LBR_HUMAN	LBR	Delta(14)-sterol reductase LBR	20.3064	20.4152	19.7678	19.6431	19.5277	19.5359
+	1.42023	1.4455	Q14746	Q14746;Q14746-2;B7Z2Y2	COG2_HUMAN	COG2	Conserved oligomeric Golgi complex subunit 2	21.0827	19.5717	20.0928	18.4899	18.8575	19.0633
+	2.20617	0.457808	Q14781	Q14781	CBX2_HUMAN	CBX2	Chromobox protein homolog 2	20.1638	20.0833	20.3725	19.7283	19.7673	19.7507
+	2.07991	-1.93547	Q147X3;Q147X3-2	Q147X3;Q147X3-2	NAA30_HUMAN	NAA30	N-alpha-acetyltransferase 30	16.5166	17.6532	17.1489	19.3178	18.5944	19.2128
+	1.67473	0.26284	Q14807	Q14807;Q14807-2;A0A8I5QJC5;A0A8I5QJF2;A0A8I5QKY3;A0A8I5QL17;H3BRB3;A0A8I5KQ45;A0A8I5KRF7;A0A8I5KSP6;A0A8I5KTF7;A0A8I5KW08;A0A8I5KXF2;A0A8I5KXF9	KIF22_HUMAN	KIF22	Kinesin-like protein KIF22	21.5043	21.5784	21.3398	21.2318	21.2084	21.1937
+	2.32738	0.40486	Q14839;Q14839-2	Q14839;A0A2R8Y212;A0A2R8Y8C1;A0A2R8Y7I0;A0A2R8Y7M9;A0A2R8Y425;A0A2R8Y5J0;A0A2R8Y5M9;A0A2R8Y4X2;A0A2R8Y521;A0A2R8YDW2;A0A2R8YE38;A0A2R8YDJ9;A0A2R8YD40;A0A2R8YFK9;A0A2R8YFD8;A0A2R8YER1;A0A2U3TZM0;F5GWX5;Q14839-2;A0A0C4DGG9;A0A2R8Y445	CHD4_HUMAN	CHD4	Chromodomain-helicase-DNA-binding protein 4	22.2973	22.2298	22.113	21.8724	21.8351	21.718
+	2.8199	1.39402	Q14847;Q14847-2	Q14847;C9J9W2;Q14847-2;Q14847-3	LASP1_HUMAN	LASP1	LIM and SH3 domain protein 1	19.9633	19.9225	20.1148	18.6765	18.8604	18.2815
+	1.27821	-1.16728	Q14914	Q14914;Q14914-2;F2Z3J9	PTGR1_HUMAN	PTGR1	Prostaglandin reductase 1	14.4976	15.5893	15.7397	16.7004	16.5165	16.1116
+	1.04223	0.496387	Q14919;Q14919-2	Q14919;Q14919-2;C9JCC6;E9PQX9;E9PNC7	NC2A_HUMAN	DRAP1	Dr1-associated corepressor	21.2337	21.3501	20.6715	20.6579	20.4321	20.6762
+	3.43611	0.581297	Q14966	Q14966;Q14966-2;Q14966-3;Q14966-4;Q14966-6	ZN638_HUMAN	ZNF638	Zinc finger protein 638	21.5164	21.3497	21.3919	20.8606	20.842	20.8114
+	2.79359	0.78501	Q14974	Q14974;J3KTM9;Q14974-2	IMB1_HUMAN	KPNB1	Importin subunit beta-1	21.8754	21.8194	21.5707	21.0075	21.0196	20.8833
+	2.23338	0.545851	Q14978-2	A0A0A0MRM9;Q14978-2	NOLC1_HUMAN	NOLC1	Isoform of Q14978, Isoform Beta of Nucleolar and coiled-body phosphoprotein 1	24.2282	24.228	23.9654	23.6971	23.559	23.528
+	2.98709	0.210987	Q14980	Q14980;H0YFY6;K4DIE0;Q14980-2;Q14980-3;Q14980-4	NUMA1_HUMAN	NUMA1	Nuclear mitotic apparatus protein 1	22.035	22.0314	22.0385	21.7886	21.8713	21.812
+	1.96541	-1.19739	Q14999	Q14999;Q14999-2;A0A8I5KQF0;A0A8I5KW87;A0A8I5KUS3;A0A669KBH4;A0A669KB95	CUL7_HUMAN	CUL7	Cullin-7	16.9102	17.5707	16.9567	18.589	18.0435	18.3972
+	2.22941	0.847895	Q14C86-6	Q14C86;C9IZ08;B0QZ65;Q14C86-2;Q14C86-3;Q14C86-4;Q14C86-5;Q14C86-6;F8W9S7;H0Y7I9;B4DGD8	GAPD1_HUMAN	GAPVD1	Isoform of Q14C86, Isoform 6 of GTPase-activating protein and VPS9 domain-containing protein 1	20.5336	20.6558	20.6488	19.458	19.9088	19.9278
+	3.44432	0.767214	Q14CX7	Q14CX7;Q14CX7-2	NAA25_HUMAN	NAA25	N-alpha-acetyltransferase 25, NatB auxiliary subunit	20.8324	20.833	20.9704	20.1814	20.0129	20.1399
+	4.70092	1.10891	Q15003	Q15003;C9J470;C9JZP1;E9PHA2	CND2_HUMAN	NCAPH	Condensin complex subunit 2	21.9256	21.8886	21.7982	20.8076	20.769	20.709
+	2.19563	1.29786	Q15004	Q15004;Q15004-2;H0YMA4;A0A0U1RQC1;A0A0U1RQM0	PAF15_HUMAN	PCLAF	PCNA-associated factor	19.4115	18.7649	19.3314	17.8189	17.6563	18.139
+	3.08393	0.947671	Q15008	Q15008;Q15008-2;Q15008-3;Q15008-4;C9J0E9;H7C531	PSMD6_HUMAN	PSMD6	26S proteasome non-ATPase regulatory subunit 6	20.2352	20.2375	19.9934	19.1913	19.3299	19.1019
+	3.92142	0.717564	Q15014	Q15014;Q5JXX1;Q5JXX2	MO4L2_HUMAN	MORF4L2	Mortality factor 4-like protein 2	22.1033	22.1424	22.113	21.3119	21.4695	21.4245
+	2.68073	1.02589	Q15018	Q15018	ABRX2_HUMAN	ABRAXAS2	BRISC complex subunit Abraxas 2	17.2803	17.5487	17.6522	16.6253	16.4746	16.3036
+	3.3115	0.915603	Q15019;Q15019-2	Q15019;C9IY94;C9J938;C9J2Q4;Q15019-2;Q15019-3;B5MCX3;C9JB25;H7C310	SEPT2_HUMAN	SEPTIN2	Septin-2	21.9053	21.8438	21.6289	20.8535	20.9326	20.8451
+	2.65925	0.592745	Q15020	Q15020;H0YHU8;A0A499FI31;Q15020-4	SART3_HUMAN	SART3	Squamous cell carcinoma antigen recognized by T-cells 3	20.2403	20.0817	20.0177	19.6199	19.4397	19.5018
+	5.22646	1.06107	Q15021	Q15021	CND1_HUMAN	NCAPD2	Condensin complex subunit 1	21.765	21.7543	21.6871	20.709	20.6833	20.6309
+	2.93983	0.225547	Q15022	Q15022	SUZ12_HUMAN	SUZ12	Polycomb protein SUZ12	20.6373	20.7209	20.6512	20.4452	20.4581	20.4295
+	4.11876	0.423542	Q15029;Q15029-2	Q15029;Q15029-2;Q15029-3	U5S1_HUMAN	EFTUD2	116 kDa U5 small nuclear ribonucleoprotein component	22.2676	22.2219	22.2658	21.8609	21.8335	21.7902
+	2.23039	1.07881	Q15041;Q15041-2	Q15041;Q15041-2;Q15041-3;H3BPJ2;H3BN98	AR6P1_HUMAN	ARL6IP1	ADP-ribosylation factor-like protein 6-interacting protein 1	18.4554	19.0287	19.0862	17.7686	17.7984	17.7669
+	3.86131	0.709949	Q15046	Q15046;Q15046-2;H3BVA8	SYK_HUMAN	KARS1	Lysine--tRNA ligase	23.1086	23.1003	22.9659	22.3155	22.3764	22.3531
+	1.84535	0.900957	Q15047;Q15047-3	Q15047;Q15047-3;E9PRF4;E9PQM8;A0A8I5KT93	SETB1_HUMAN	SETDB1	Histone-lysine N-methyltransferase SETDB1	19.9587	19.9852	19.4628	18.6815	18.8744	19.1478
+	3.90725	0.78279	Q15050	Q15050	RRS1_HUMAN	RRS1	Ribosome biogenesis regulatory protein homolog	23.7571	23.7182	23.6556	22.9544	22.9869	22.8411
+	2.74767	1.03402	Q15054	Q15054;Q15054-2;Q15054-3	DPOD3_HUMAN	POLD3	DNA polymerase delta subunit 3	21.2814	21.1441	21.1456	20.1992	20.361	19.9088
+	3.3269	1.33127	Q15056	Q15056;Q15056-2;A0A7I2V385;A0A7I2V4E4	IF4H_HUMAN	EIF4H	Eukaryotic translation initiation factor 4H	20.313	20.0471	20.1024	18.7751	19.0115	18.6821
+	4.17649	1.0256	Q15058	Q15058	KIF14_HUMAN	KIF14	Kinesin-like protein KIF14	21.8123	21.7827	21.7734	20.6789	20.737	20.8757
+	2.79208	0.574164	Q15059	Q15059;O60885;Q15059-2;M0QZD9;O60885-2;O60885-3	BRD3_HUMAN	BRD3	Bromodomain-containing protein 3	20.1424	20.2152	20.206	19.6404	19.4777	19.723
+	3.29772	0.708841	Q15061	Q15061;C9JEE7	WDR43_HUMAN	WDR43	WD repeat-containing protein 43	21.0052	21.0417	20.9709	20.3424	20.3815	20.1674
+	3.52031	1.16462	Q15084;Q15084-2;Q15084-3;Q15084-4;Q15084-5	Q15084;Q15084-2;Q15084-3;Q15084-4;Q15084-5	PDIA6_HUMAN	PDIA6	Protein disulfide-isomerase A6	20.1001	20.2748	20.2738	18.9338	19.2055	19.0155
+	3.72406	1.55838	Q15102	Q15102;M0R389	PA1B3_HUMAN	PAFAH1B3	Platelet-activating factor acetylhydrolase IB subunit alpha1	18.7029	18.5391	18.6326	17.1605	17.1876	16.8514
+	2.24278	0.633888	Q15149-4	Q15149-4	PLEC_HUMAN	PLEC	Isoform of Q15149, Isoform 4 of Plectin	22.5096	22.3788	22.3903	21.5924	21.9712	21.8135
+	3.28271	0.702012	Q15154-5	Q15154;A0A5H1ZRS1;E7EV93;Q15154-2;Q15154-3;Q15154-4;Q15154-5;A0A4W8VX11;E9PGW9;E5RGQ4	PCM1_HUMAN	PCM1	Isoform of Q15154, Isoform 5 of Pericentriolar material 1 protein	19.5235	19.5451	19.5709	18.7275	18.8447	18.9612
+	4.20214	1.06461	Q15165;Q15165-1	Q15165;A0A0J9YXF2;A0A0J9YYJ1;Q15165-1;Q15165-3;G3XAK4	PON2_HUMAN	PON2	Serum paraoxonase/arylesterase 2	20.5253	20.4361	20.5418	19.4621	19.5096	19.3377
+	2.78623	1.62363	Q15181	Q15181;Q5SQT6	IPYR_HUMAN	PPA1	Inorganic pyrophosphatase	20.3548	19.8631	19.7789	18.1974	18.5971	18.3313
+	3.03452	1.06922	Q15185;Q15185-4	Q15185;Q15185-3;Q15185-4;A0A087WYT3	TEBP_HUMAN	PTGES3	Prostaglandin E synthase 3	20.7067	20.4786	20.7722	19.553	19.7396	19.4572
+	2.94245	0.610987	Q15233	Q15233;C9IZL7;A0A7P0MRW0;C9J4X2;C9JYS8;Q15233-2;A0A7I2V464;A0A7I2V4K9;A0A7I2V4J2;A0A7I2V4N2;A0A7I2V535;A0A7I2V5Y7	NONO_HUMAN	NONO	Non-POU domain-containing octamer-binding protein	21.8809	21.7989	21.7911	21.3346	21.1011	21.2022
+	1.85127	0.470542	Q15269	Q15269	PWP2_HUMAN	PWP2	Periodic tryptophan protein 2 homolog	20.6149	20.5552	20.7653	20.0581	20.1049	20.3608
+	4.29345	1.69888	Q15286	Q15286;F5H157	RAB35_HUMAN	RAB35	Ras-related protein Rab-35	21.8448	21.9956	21.814	20.0407	20.2443	20.2728
+	2.15388	0.790621	Q15291	Q15291;Q15291-2	RBBP5_HUMAN	RBBP5	Retinoblastoma-binding protein 5	19.3228	19.2576	19.4126	18.4422	18.8324	18.3465
+	2.21354	0.713434	Q15293	Q15293;Q15293-2	RCN1_HUMAN	RCN1	Reticulocalbin-1	22.5527	22.4509	22.1385	21.7258	21.7112	21.5647
+	3.3775	0.803652	Q15311	Q15311;A0A1W2PRI7;E7ENF8	RBP1_HUMAN	RALBP1	RalA-binding protein 1	17.9515	17.9671	17.8399	17.155	17.1997	16.9928
+	2.07003	0.479625	Q15326;Q15326-3;Q15326-6	Q15326;B0QZE2;E7EV75;B7Z2J6;A0A0D9SGD6;A0A0A0MRY2;E7ENI9;Q15326-2;Q15326-3;Q15326-4;Q15326-5;Q15326-6	ZMY11_HUMAN	ZMYND11	Zinc finger MYND domain-containing protein 11	20.1148	20.0083	19.8289	19.5217	19.4031	19.5884
+	1.54645	0.338831	Q15334	Q15334;A0A087WW77	L2GL1_HUMAN	LLGL1	Lethal(2) giant larvae protein homolog 1	20.1493	19.9829	20.1259	19.9046	19.6061	19.7308
+	1.77319	0.459222	Q15361	Q15361;A0A087WY09	TTF1_HUMAN	TTF1	Transcription termination factor 1	19.4302	19.3545	19.361	19.0033	18.6981	19.0667
+	1.80856	0.409243	Q15365	Q15365	PCBP1_HUMAN	PCBP1	Poly(rC)-binding protein 1	23.9552	23.9112	24.2255	23.6691	23.6039	23.5912
+	2.01157	0.70057	Q15366;Q15366-2	Q15366;H3BSS4;H3BRU6;F8VZX2;Q15366-2;Q15366-3;Q15366-4;Q15366-5;Q15366-6;Q15366-7;Q15366-8	PCBP2_HUMAN	PCBP2	Poly(rC)-binding protein 2	21.9731	21.9682	22.4173	21.4588	21.4257	21.3724
+	3.85827	-0.702687	Q15369	Q15369;A0A8J9AD82;Q15369-2;A0A8I5KYG1;E5RHG8	ELOC_HUMAN	ELOC	Elongin-C	21.1809	21.1564	21.1443	21.9516	21.7869	21.8512
+	2.75093	-0.548051	Q15370;Q15370-2	Q15370;B8ZZU8;Q15370-2;A0A0B4J296;A0A8I5KUS5;I3L0M9	ELOB_HUMAN	ELOB	Elongin-B	20.9188	20.8332	21.0838	21.4951	21.5067	21.4782
+	1.36383	0.401452	Q15390;Q15390-2	Q15390;H0YF01;H0YBZ4;Q15390-2;H7C5V5	MTFR1_HUMAN	MTFR1	Mitochondrial fission regulator 1	17.8575	17.824	17.9228	17.4759	17.6947	17.2293
+	4.10434	1.03147	Q15392	Q15392;Q15392-2;A0A0A0MTI1;A0A3B3IT58;A0A3B3ITT9	DHC24_HUMAN	DHCR24	Delta(24)-sterol reductase	21.0597	21.1373	21.0528	20.0459	19.9574	20.152
+	2.5583	0.312818	Q15393	Q15393	SF3B3_HUMAN	SF3B3	Splicing factor 3B subunit 3	23.8435	23.7974	23.7875	23.5654	23.4138	23.5107
+	0.762378	1.81606	Q15398;Q15398-3	Q15398;Q15398-1;Q15398-3	DLGP5_HUMAN	DLGAP5	Disks large-associated protein 5	17.0467	17.2093	17.3434	13.2071	16.6384	16.3057
+	3.20152	0.973651	Q15404	Q15404	RSU1_HUMAN	RSU1	Ras suppressor protein 1	19.399	19.2755	19.4421	18.3085	18.5723	18.3147
+	1.6297	0.573941	Q15424;Q15424-3;Q15424-4	Q15424;K7EII0;Q15424-2;Q15424-3;Q15424-4	SAFB1_HUMAN	SAFB	Scaffold attachment factor B1	20.7935	20.87	20.5602	19.9685	20.4151	20.1182
+	2.97282	0.648758	Q15428	Q15428;K7EMT0	SF3A2_HUMAN	SF3A2	Splicing factor 3A subunit 2	20.1205	20.022	20.0324	19.3599	19.5476	19.3211
+	3.33384	0.921479	Q15434	Q15434;F8VV01;F8W1T6;F5H5C8	RBMS2_HUMAN	RBMS2	RNA-binding motif, single-stranded-interacting protein 2	21.6345	21.7632	21.8814	20.817	20.9353	20.7623
+	2.018	1.09499	Q15436	Q15436;Q15436-2;F5H365	SC23A_HUMAN	SEC23A	Protein transport protein Sec23A	19.7771	19.2587	19.2037	18.1422	18.612	18.2004
+	3.35007	0.435251	Q15459	Q15459;Q15459-2	SF3A1_HUMAN	SF3A1	Splicing factor 3A subunit 1	20.83	20.8202	20.8854	20.4203	20.4658	20.3437
+	2.45342	-0.581298	Q15527	Q15527	SURF2_HUMAN	SURF2	Surfeit locus protein 2	22.6746	22.6381	22.7666	23.2213	23.1589	23.4431
+	1.40061	0.966736	Q15532;Q15532-2	Q15532;J3KRP6;J3KT74;Q15532-2;F5GWN1;J3QQW2;J3QQM2;J3QS72;X6R3J2	SSXT_HUMAN	SS18	Protein SSXT	19.1168	19.3217	19.2438	18.3168	18.7781	17.6872
+	1.22624	1.84035	Q15554	Q15554;J3KSZ6;H3BTA7;H3BR06;U3KQ35	TERF2_HUMAN	TERF2	Telomeric repeat-binding factor 2	17.4366	17.7	17.3568	16.5261	16.1682	14.2782
+	0.907316	-0.775529	Q15573	Q15573	TAF1A_HUMAN	TAF1A	TATA box-binding protein-associated factor RNA polymerase I subunit A	15.9231	17.0729	17.1383	17.4861	17.3865	17.5882
+	1.84875	0.816533	Q15629;Q15629-2	Q15629;Q15629-2;G3XAN4	TRAM1_HUMAN	TRAM1	Translocating chain-associated membrane protein 1	19.8691	20.0179	19.9118	19.4652	18.8058	19.0782
+	1.37469	2.9416	Q15631	Q15631;Q15631-2;A0A0J9YVW2;H7C1D4;E9PGT1	TSN_HUMAN	TSN	Translin	19.2369	18.3527	18.8023	15.306	17.7343	14.5268
+	2.11105	-0.677661	Q15633-2	Q15633;Q15633-2;F8VZ57;F8VZZ7;F8VYK3;F8VYK6;F8VTT7;F8VP94	TRBP2_HUMAN	TARBP2	Isoform of Q15633, Isoform 2 of RISC-loading complex subunit TARBP2	21.0673	21.2303	21.5167	21.8738	21.9992	21.9743
+	2.13452	0.668613	Q15637-6	Q15637-6;H7C561;H7C0N4	SF01_HUMAN	SF1	Isoform of Q15637, Isoform 6 of Splicing factor 1	20.7356	20.77	20.4399	19.9726	20.1252	19.842
+	1.06548	2.18062	Q15642	Q15642;W4VSQ9;Q15642-2;Q15642-3;Q15642-4;Q15642-5;M0R0F9;M0R2H7	CIP4_HUMAN	TRIP10	Cdc42-interacting protein 4	19.4447	19.4814	19.1557	17.9538	15.2782	18.3078
+	1.21343	-2.22922	Q15643	Q15643;H0YJ97;Q15643-2	TRIPB_HUMAN	TRIP11	Thyroid receptor-interacting protein 11	16.0924	17.7139	15.0322	18.2092	19.2451	18.0719
+	2.84441	0.912595	Q15645	Q15645;H0YAL2	PCH2_HUMAN	TRIP13	Pachytene checkpoint protein 2 homolog	20.6267	20.7238	20.8122	19.7712	19.6507	20.003
+	2.85312	0.526695	Q15646	Q15646;A0A7P0T9H8;A0A7P0TB39	OASL_HUMAN	OASL	2'-5'-oligoadenylate synthase-like protein	22.4112	22.4462	22.4759	21.863	21.8446	22.0457
+	1.63694	0.340506	Q15649	Q15649;Q15649-2	ZNHI3_HUMAN	ZNHIT3	Zinc finger HIT domain-containing protein 3	20.3791	20.3939	20.1435	19.9138	20.0638	19.9174
+	4.6713	-0.363928	Q15650	Q15650;H0YL91;H3BMU9	TRIP4_HUMAN	TRIP4	Activating signal cointegrator 1	23.6549	23.6251	23.6046	23.9878	24.0043	23.9843
+	0.883724	1.53509	Q15652;Q15652-2;Q15652-3	Q15652;Q15652-2;Q15652-3	JHD2C_HUMAN	JMJD1C	Probable JmjC domain-containing histone demethylation protein 2C	18.0806	18.0536	18.4059	17.1704	17.6933	15.071
+	1.43886	0.536668	Q15654	Q15654	TRIP6_HUMAN	TRIP6	Thyroid receptor-interacting protein 6	18.8908	18.4147	18.4747	17.9889	18.2303	17.9509
+	2.69746	1.01576	Q15691	Q15691	MARE1_HUMAN	MAPRE1	Microtubule-associated protein RP/EB family member 1	19.24	18.9258	19.2658	17.9476	18.2199	18.2168
+	1.01528	-0.951942	Q15696	Q15695;Q15696;A0A8I5QKS0;A0A8I5KSD0;A0A8I5KRH1	U2AFM_HUMAN	ZRSR2	U2 small nuclear ribonucleoprotein auxiliary factor 35 kDa subunit-related protein 2	18.5799	19.0145	20.0421	20.2699	20.2048	20.0176
+	1.89378	0.587042	Q15697	Q15697	ZN174_HUMAN	ZNF174	Zinc finger protein 174	18.049	18.4263	18.2988	17.6083	17.8306	17.5742
+	2.14416	3.10858	Q15714;Q15714-2;Q15714-3	Q15714;Q15714-2;Q15714-3;A0A087X0H8	T22D1_HUMAN	TSC22D1	TSC22 domain family protein 1	17.7822	17.7349	18.3536	15.3577	13.6889	15.4984
+	3.57119	0.702507	Q15717;Q15717-2	Q15717;Q15717-2	ELAV1_HUMAN	ELAVL1	ELAV-like protein 1	20.3342	20.4623	20.353	19.6041	19.7497	19.6882
+	1.2873	1.31078	Q15751	Q15751	HERC1_HUMAN	HERC1	Probable E3 ubiquitin-protein ligase HERC1	18.0771	16.5199	17.1312	15.8996	15.6884	16.2079
+	2.50046	0.677261	Q15758	Q15758;M0QXM4;M0QX44	AAAT_HUMAN	SLC1A5	Neutral amino acid transporter B(0)	18.8063	19.0569	19.1609	18.3663	18.3155	18.3107
+	3.23984	1.20068	Q15773	Q15773;F5H0Y3	MLF2_HUMAN	MLF2	Myeloid leukemia factor 2	20.958	20.8741	20.7214	19.7951	19.6953	19.4611
+	2.2784	4.11328	Q15819	Q15819;H0YBX6;G3V113	UB2V2_HUMAN	UBE2V2	Ubiquitin-conjugating enzyme E2 variant 2	19.3786	18.9152	19.8819	13.9722	15.54	16.3236
+	2.59154	0.371403	Q15843	Q15843;F8VSA6;E9PS38;E9PL57;S4R3E9	NEDD8_HUMAN	NEDD8	NEDD8	20.3701	20.3578	20.481	19.9969	19.9884	20.1095
+	2.47002	1.19975	Q15942	Q15942;H7C3R3;Q15942-2	ZYX_HUMAN	ZYX	Zyxin	18.7371	18.8784	18.6762	17.8407	17.6339	17.2178
+	4.58924	1.20641	Q16181	Q16181;A0A0U1RRE1;A0A0U1RRH9;E7ES33;E7EPK1;Q16181-2;G3V1Q4;A0A024RA87	SEPT7_HUMAN	SEPTIN7	Septin-7	22.404	22.242	22.3237	21.0585	21.1465	21.1455
+	4.00859	1.03486	Q16186	Q16186;A0A087WUX6;A0A087WX59	ADRM1_HUMAN	ADRM1	Proteasomal ubiquitin receptor ADRM1	19.2422	19.1618	19.2631	18.0703	18.2469	18.2453
+	3.17941	1.8224	Q16204	Q16204	CCDC6_HUMAN	CCDC6	Coiled-coil domain-containing protein 6	19.1986	19.6503	19.6266	17.8671	17.4503	17.6909
+	2.62553	2.98928	Q16222;Q16222-2;Q16222-3	Q16222;Q3KQV9;Q16222-2;Q16222-3	UAP1_HUMAN	UAP1	UDP-N-acetylhexosamine pyrophosphorylase	18.3055	18.5902	18.0678	16.1277	15.0974	14.7705
+	1.46172	0.823175	Q16401	Q16401;Q16401-2	PSMD5_HUMAN	PSMD5	26S proteasome non-ATPase regulatory subunit 5	19.7013	19.2339	19.8263	18.5595	18.5905	19.1421
+	1.853	0.729508	Q16531	Q16531;A0A7P0T965;A0A7P0T870;A0A7P0TAK7;A0A7P0Z4L2;A0A7P0Z3Z5;A0A7P0Z4B9;F5GZY8;F5GY55;F5GWI0;F5H2L3	DDB1_HUMAN	DDB1	DNA damage-binding protein 1	23.7567	23.7245	23.5415	22.8674	22.7117	23.2552
+	1.33558	0.747438	Q16537;Q16537-2	Q16537;Q16537-2;Q16537-3	2A5E_HUMAN	PPP2R5E	Serine/threonine-protein phosphatase 2A 56 kDa regulatory subunit epsilon isoform	16.4583	17.1485	17.288	16.1699	16.3225	16.16
+	1.55541	1.06276	Q16539;Q16539-2;Q16539-3	Q15759;O15264;P45984;P53779;P53778;P45983;Q16539;J3KNK1;E7EX54;O15264-2;P53778-2;D6RJF9;P53779-2;P53779-3;A0A286YEV3;A0A286YEX7;A0A286YEY0;A0A286YF97;A0A286YEV8;A0A286YEW9;A0A286YF83;A0A286YF85;A0A286YF19;A0A286YEN5;A0A286YEQ0;A0A286YEQ7;A0A286YF02;A0A286YES0;A0A286YES9;A0A286YF35;A0A286YF62;A0A286YFJ4;A0A286YFJ6;A0A286YFI3;A0A286YFN2;F8W9R5;A0A286YFM6;A0A286YFA6;A0A286YFB6;A0A286YFC0;A0A286YFD7;…	MK14_HUMAN	MAPK14	Mitogen-activated protein kinase 14	17.7759	17.7893	18.0147	17.3372	16.7725	16.2818
+	1.52521	0.397721	Q16540	Q16540	RM23_HUMAN	MRPL23	39S ribosomal protein L23, mitochondrial	20.8021	20.473	20.7238	20.2029	20.198	20.4048
+	3.07476	0.764297	Q16543	Q16543;K7EKQ2	CDC37_HUMAN	CDC37	Hsp90 co-chaperone Cdc37	21.1105	20.9808	21.1766	20.2669	20.4497	20.2582
+	0.90484	2.2606	Q16555;Q16555-2	Q16555;A0A1C7CYX9;Q16555-2	DPYL2_HUMAN	DPYSL2	Dihydropyrimidinase-related protein 2	20.3666	20.2305	19.7445	15.6714	19.5763	18.3121
+	3.11926	0.919965	Q16563-2	Q16563;Q16563-2;A0A0U1RQT9;C9JYN0	SYPL1_HUMAN	SYPL1	Isoform of Q16563, Isoform 2 of Synaptophysin-like protein 1	20.2327	20.465	20.5047	19.5831	19.4457	19.4137
+	2.21795	0.367713	Q16594	Q16594;Q9HBM6;D6RIV9;D6RIE8;D6RGK3	TAF9_HUMAN	TAF9	Transcription initiation factor TFIID subunit 9	18.8314	18.7517	18.6045	18.3287	18.3596	18.3962
+	2.03146	0.434891	Q16629;Q16629-2;Q16629-3;Q16629-4	Q16629;Q16629-2;Q16629-3;Q16629-4;C9JAB2;A0A0B4J1Z1	SRSF7_HUMAN	SRSF7	Serine/arginine-rich splicing factor 7	26.1432	26.2525	26.0643	25.7126	25.5921	25.8507
+	4.52095	1.56176	Q16630-2	Q16630;Q16630-2;Q16630-3;F8WJN3	CPSF6_HUMAN	CPSF6	Isoform of Q16630, Isoform 2 of Cleavage and polyadenylation specificity factor subunit 6	23.0698	23.1253	22.931	21.5223	21.5313	21.3873
+	4.10682	0.885951	Q16637;Q16637-3	Q16637;E7EQZ4;H0YBZ9;B4DP61;A0A1W2PRV5;A0A0G2JRX5;A0A0G2JRY6;Q16637-2;Q16637-3;Q16637-4	SMN_HUMAN	SMN2	Survival motor neuron protein	20.9106	21.0425	21.0514	20.134	20.1525	20.0602
+	2.7676	1.3709	Q16643	Q16643;D6RFI1;D6RCR4;D6R9W4;Q16643-2;Q16643-3	DREB_HUMAN	DBN1	Drebrin	23.8893	23.6755	23.8246	22.1255	22.4301	22.7212
+	1.47286	1.29261	Q16651	Q16651;Q16651-2	PRSS8_HUMAN	PRSS8	Prostasin	21.2614	21.2946	21.2328	19.4255	19.72	20.7656
+	3.27197	1.10569	Q16656;Q16656-4	Q16656;Q16656-2;Q16656-4;C9JP85	NRF1_HUMAN	NRF1	Nuclear respiratory factor 1	19.0625	19.1541	19.2098	18.1858	17.8457	18.0779
+	3.48714	1.40267	Q16658	Q16658;C9JPH9;C9JFC0;A0A0A0MSB2	FSCN1_HUMAN	FSCN1	Fascin	20.7656	20.3788	20.4839	19.2117	19.1312	19.0772
+	1.32496	2.46106	Q16772	P08263;P09210;Q7RTV2;Q16772;Q5JW85	GSTA3_HUMAN	GSTA3	Glutathione S-transferase A3	18.7311	18.0722	19.177	17.8139	15.4483	15.3349
+	1.23209	1.15786	Q16822	Q16822;Q16822-2;H0YM31	PCKGM_HUMAN	PCK2	Phosphoenolpyruvate carboxykinase [GTP], mitochondrial	16.0736	16.9224	16.9925	15.7079	15.9438	14.8631
+	1.44474	2.7502	Q16850	Q16850;Q16850-2;A0A8I5KRT9;A0A8I5KWQ7	CP51A_HUMAN	CYP51A1	Lanosterol 14-alpha demethylase	17.8363	18.0751	18.0592	14.1667	16.9875	14.5658
+	2.6161	0.943639	Q16851;Q16851-2	Q16851;Q16851-2;E7EUC7;A0A7I2YQ74;A0A087WYS1	UGPA_HUMAN	UGP2	UTP--glucose-1-phosphate uridylyltransferase	18.6419	18.9507	19.0285	17.9404	17.8	18.0498
+	2.52749	0.619439	Q16880	Q16880	CGT_HUMAN	UGT8	2-hydroxyacylsphingosine 1-beta-galactosyltransferase	19.3452	19.1809	19.0639	18.6695	18.567	18.4953
+	2.67081	0.394257	Q16881-2	Q16881;A0A182DWI3;E9PIR7;E9PKD3;Q16881-2;Q16881-3;Q16881-4;Q16881-5;Q16881-6;Q16881-7	TRXR1_HUMAN	TXNRD1	Isoform of Q16881, Isoform 2 of Thioredoxin reductase 1, cytoplasmic	19.8195	19.7208	19.7739	19.3512	19.4704	19.3099
+	1.90606	2.79296	Q16890;Q16890-5	Q16890;J3KNE7;Q16890-2;Q16890-3;Q16890-4;Q16890-5;E9PPQ1;E9PNK6	TPD53_HUMAN	TPD52L1	Tumor protein D53	17.4321	17.1052	18.3027	15.2523	13.7506	15.4582
+	4.61579	1.08422	Q16891-2	Q16891;Q16891-3;Q16891-4;Q16891-2;D6RAW4;B9A067	MIC60_HUMAN	IMMT	Isoform of Q16891, Isoform 2 of MICOS complex subunit MIC60	21.0477	21.0246	21.1619	19.9584	19.9834	20.0397
+	2.69629	0.504527	Q17RY0;Q17RY0-2	Q17RY0;B7ZLQ8;H0YBG1;Q17RY0-2;E5RJM0	CPEB4_HUMAN	CPEB4	Cytoplasmic polyadenylation element-binding protein 4	21.7278	21.6783	21.5492	21.2293	21.0696	21.1429
+	2.95429	-0.838518	Q1KMD3	Q1KMD3;H3BQZ7	HNRL2_HUMAN	HNRNPUL2	Heterogeneous nuclear ribonucleoprotein U-like protein 2	20.5032	20.4531	20.548	21.4279	21.4443	21.1476
+	1.63182	-1.63075	Q1X8D7	Q1X8D7;J3QSG3	LRC36_HUMAN	LRRC36	Leucine-rich repeat-containing protein 36	18.2205	17.1453	18.3421	19.1211	19.4863	19.9928
+	3.95045	1.14077	Q27J81	Q27J81;A0A6Q8PFW4;A0A6Q8PGN3;A0A6Q8PGC7;A0A6Q8PHA2;A0A6Q8PH63;A0A6Q8PH71;A0A6Q8PH25;A0A6Q8PF29;A0A6Q8PF44;A0A6Q8PHG2;A0A6Q8PHS8;Q27J81-2;A0A0A0MQU1;A0A087X118	INF2_HUMAN	INF2	Inverted formin-2	21.8883	21.8645	21.9939	20.6632	20.7754	20.8857
+	3.49714	1.62705	Q29983	Q29983;Q29983-2;A0A1W2PPN1;H0Y615;A0A1W2PRA6;Q96QC4;A0A140T9T9;A0A140T9Z8;A0A140T9P3;A0A140T9I5;A0A140T9B8;A0A140T986;A0A024RCL3;A0A0G2JK11	MICA_HUMAN	MICA	MHC class I polypeptide-related sequence A	21.8671	21.9865	21.9633	20.2752	20.5632	20.0974
+	4.18045	1.05735	Q29RF7	Q29RF7	PDS5A_HUMAN	PDS5A	Sister chromatid cohesion protein PDS5 homolog A	19.3439	19.1737	19.1742	18.187	18.2048	18.1279
+	1.97417	0.49913	Q2KHR3	Q2KHR3;Q2KHR3-2;A0A3B3IRW6	QSER1_HUMAN	QSER1	Glutamine and serine-rich protein 1	19.0681	18.9909	19.128	18.768	18.443	18.4786
+	2.62469	1.07744	Q2M2I8;Q2M2I8-2	Q2M2I8;Q2M2I8-2;A0A096LP25;E9PG46	AAK1_HUMAN	AAK1	AP2-associated protein kinase 1	18.7185	18.9108	19.2331	17.9397	17.7856	17.9048
+	2.79655	0.594772	Q2M389	Q2M389;Q2M389-2;A0A087X256	WASC4_HUMAN	WASHC4	WASH complex subunit 4	20.3068	20.3973	20.2743	19.8461	19.6079	19.7401
+	3.27345	-0.923271	Q2NL82	Q2NL82	TSR1_HUMAN	TSR1	Pre-rRNA-processing protein TSR1 homolog	25.7299	25.7196	25.4603	26.5998	26.5586	26.5212
+	2.25695	-0.901502	Q2TAK8;Q2TAK8-2;Q2TAK8-3	Q2TAK8;Q2TAK8-2;Q2TAK8-3;J3KNX4;A0A0D9SGJ8	PWP3A_HUMAN	PWWP3A	PWWP domain-containing DNA repair factor 3A	20.1587	19.9953	20.4983	20.9776	21.151	21.2282
+	1.53128	0.280114	Q2TAY7	Q2TAY7	SMU1_HUMAN	SMU1	WD40 repeat-containing protein SMU1	21.8723	21.7676	21.8417	21.5535	21.4081	21.6797
+	2.96984	0.694331	Q2TB10	Q2TB10;C9K0M9;C9JLY3;C9JHX9	ZN800_HUMAN	ZNF800	Zinc finger protein 800	18.7648	18.9486	18.9029	18.1685	18.2873	18.0775
+	1.94931	0.392947	Q2TBE0	Q2TBE0;H0YE03;Q2TBE0-2;Q2TBE0-3;H7C3G7	C19L2_HUMAN	CWF19L2	CWF19-like protein 2	21.2086	21.3982	21.1023	20.8203	20.8776	20.8323
+	4.26466	1.21019	Q32MZ4-3	Q32MZ4;C9JTC6;Q32MZ4-2;Q32MZ4-3	LRRF1_HUMAN	LRRFIP1	Isoform of Q32MZ4, Isoform 3 of Leucine-rich repeat flightless-interacting protein 1	22.1412	22.0934	22.1634	20.8221	21.0399	20.9055
+	2.78075	0.356218	Q32NC0	Q32NC0;A0A087X0E7	CR021_HUMAN	C18orf21	UPF0711 protein C18orf21	20.8364	20.918	20.9689	20.5859	20.4977	20.571
+	4.08119	0.783115	Q32P44	Q32P44;G3V195;G3V1D0;H0Y3M3;B7WPE2;Q32P44-2	EMAL3_HUMAN	EML3	Echinoderm microtubule-associated protein-like 3	20.6588	20.5356	20.6074	19.8329	19.8637	19.7557
+	3.12185	0.691144	Q3KQU3	Q3KQU3;D3DPS3;C9JIR3;Q3KQU3-2;Q3KQU3-4	MA7D1_HUMAN	MAP7D1	MAP7 domain-containing protein 1	23.4174	23.4506	23.5838	22.7672	22.8975	22.7136
+	4.66475	0.827598	Q3MHD2	Q3MHD2;Q3MHD2-2;K7ELG9	LSM12_HUMAN	LSM12	Protein LSM12	23.6493	23.596	23.55	22.7611	22.8129	22.7385
+	1.74812	0.686876	Q3SXY8	Q3SXY8;F8WAY0;F8W837;A0A7P0T8G9;A0A7P0T969;A0A7P0T9C1;A0A7P0TAL8;A0A7P0TAS1;A0A7P0Z407;A0A7P0Z473	AR13B_HUMAN	ARL13B	ADP-ribosylation factor-like protein 13B	17.6424	17.5527	18.0645	16.9071	17.1659	17.1259
+	1.14817	1.68311	Q3T8J9-3	Q3T8J9;Q3T8J9-2;Q3T8J9-3;A0A087WUE6	GON4L_HUMAN	GON4L	Isoform of Q3T8J9, Isoform 3 of GON-4-like protein	17.631	17.7425	17.1792	16.4201	16.5806	14.5026
+	1.61943	0.671426	Q3V6T2;Q3V6T2-2	Q3V6T2;A0A2R8Y885;A0A2R8Y802;A0A2R8Y5D7;A0A2R8YDS8;A0A2R8YCU9;A0A2U3TZV9;H0Y7U8;H0Y470;H7C2C6;Q3V6T2-2;Q3V6T2-3;Q3V6T2-4;Q3V6T2-5	GRDN_HUMAN	CCDC88A	Girdin	19.1899	19.2488	18.8329	18.1702	18.4394	18.6477
+	2.11651	-1.00263	Q3YBR2	Q3YBR2;F8W6N5;E9PI10	TBRG1_HUMAN	TBRG1	Transforming growth factor beta regulator 1	17.8786	17.8317	17.3374	18.7315	18.8368	18.4873
+	2.6464	0.372587	Q3YEC7	Q3YEC7;Q3YEC7-2	RABL6_HUMAN	RABL6	Rab-like protein 6	20.2434	20.4248	20.3509	19.9739	19.9804	19.9471
+	1.99693	0.250439	Q3ZCQ8;Q3ZCQ8-2	Q3ZCQ8;Q3ZCQ8-2;Q3ZCQ8-3;M0R003;M0R2Q2;M0R2F8;M0R1Y4	TIM50_HUMAN	TIMM50	Mitochondrial import inner membrane translocase subunit TIM50	19.2866	19.3367	19.3547	18.9762	19.1416	19.1089
+	3.37573	0.276604	Q49A26	Q49A26;Q49A26-2;Q49A26-3;Q49A26-5;K7ELL0;K7EMM8;K7EQB2	GLYR1_HUMAN	GLYR1	Cytokine-like nuclear factor N-PAC	22.1953	22.1818	22.1434	21.8873	21.9361	21.8673
+	3.53963	1.20654	Q49MI3;Q49MI3-2;Q49MI3-3;Q49MI3-5	Q49MI3;Q49MI3-2;Q49MI3-3;Q49MI3-4;Q49MI3-5;Q49MI3-9;A0A804HIX5;G0XYE7	CERKL_HUMAN	CERKL	Ceramide kinase-like protein	21.1438	21.083	21.3948	20.0657	19.9906	19.9457
+	3.27658	0.707306	Q4KMP7	Q4KMP7	TB10B_HUMAN	TBC1D10B	TBC1 domain family member 10B	20.2808	20.2957	20.1312	19.5783	19.5702	19.4373
+	0.888301	1.99732	Q4KMQ1	Q4KMQ1	TPRN_HUMAN	TPRN	Taperin	17.1006	17.5679	17.9776	17.5674	14.774	14.3127
+	1.23717	1.95839	Q4U2R6	Q4U2R6	RM51_HUMAN	MRPL51	39S ribosomal protein L51, mitochondrial	15.7881	17.2856	18.2948	15.4059	15.1971	14.8903
+	1.40182	-1.794	Q4VC05;Q4VC05-2	Q4VC05;Q4VC05-2	BCL7A_HUMAN	BCL7A	B-cell CLL/lymphoma 7 protein family member A	15.6888	14.7382	16.7741	17.6948	17.3504	17.5379
+	3.08101	0.496694	Q4VC44;Q4VC44-3	Q4VC44;J3KNW1;Q4VC44-2;Q4VC44-3;Q4VC44-4;Q4VC44-5;I3L4V9;I3L188	FWCH1_HUMAN	FLYWCH1	FLYWCH-type zinc finger-containing protein 1	19.8149	19.759	19.8938	19.275	19.301	19.4016
+	0.928068	1.38669	Q52LJ0	Q52LJ0;Q52LJ0-1	FA98B_HUMAN	FAM98B	Protein FAM98B	18.8941	18.9575	19.0018	18.3708	18.1473	16.1752
+	1.73583	1.03467	Q52LW3	Q52LW3;F8VWZ8	RHG29_HUMAN	ARHGAP29	Rho GTPase-activating protein 29	18.061	17.6854	17.8018	16.397	16.8015	17.2457
+	2.90229	0.656429	Q53EZ4	Q53EZ4;Q53EZ4-2	CEP55_HUMAN	CEP55	Centrosomal protein of 55 kDa	20.4037	20.2547	20.3145	19.6976	19.5375	19.7684
+	1.94087	0.379231	Q53G59;Q53G59-2	Q53G59;Q53G59-2;Q9H7R2	KLH12_HUMAN	KLHL12	Kelch-like protein 12	19.8482	19.7342	19.5807	19.2727	19.3556	19.397
+	2.20936	0.966323	Q53GA4	Q53GA4	PHLA2_HUMAN	PHLDA2	Pleckstrin homology-like domain family A member 2	20.0199	20.5976	20.1951	19.3853	19.3531	19.1753
+	2.57156	0.527557	Q53GQ0	Q53GQ0;Q53GQ0-2;A0A1B0GV93	DHB12_HUMAN	HSD17B12	Very-long-chain 3-oxoacyl-CoA reductase	18.8366	18.9029	18.7511	18.3105	18.184	18.4134
+	1.56104	0.36592	Q53GS9	Q53GS9;B9A018;Q53GS9-2;Q53GS9-3;A0A087X1B2	SNUT2_HUMAN	USP39	U4/U6.U5 tri-snRNP-associated protein 2	21.4647	21.3729	21.3823	20.9319	20.942	21.2484
+	3.62363	0.79565	Q53HL2	Q53HL2	BOREA_HUMAN	CDCA8	Borealin	22.0027	22.036	22.1904	21.2396	21.3316	21.271
+	2.89905	1.47296	Q53TN4;Q53TN4-3	Q53TN4;Q53TN4-3	CYBR1_HUMAN	CYBRD1	Plasma membrane ascorbate-dependent reductase CYBRD1	21.2128	21.663	21.6545	19.833	20.1789	20.0996
+	0.796502	-1.95396	Q53TQ3	Q53TQ3	IN80D_HUMAN	INO80D	INO80 complex subunit D	17.1134	15.1607	18.9908	18.6009	19.4603	19.0655
+	2.88869	0.947816	Q562R1	P62736;P60709;P63261;Q562R1;P63267;P68032;A0A6Q8PFE4;A0A2R8YFE2;A0A804GS07;P63267-2;I3L4N8	ACTBL_HUMAN	ACTBL2	Beta-actin-like protein 2	30.7185	30.6804	31.0198	29.7622	29.9137	29.8994
+	3.64302	0.516216	Q56NI9	Q56NI9;E5RIE3;E5RFE4;E5RFP7	ESCO2_HUMAN	ESCO2	N-acetyltransferase ESCO2	20.7544	20.6314	20.6367	20.1584	20.1715	20.1439
+	1.8801	1.14371	Q5BJF2	Q5BJF2;J3KTD1;Q86XC5	SGMR2_HUMAN	TMEM97	Sigma intracellular receptor 2	19.0179	19.5342	19.0584	18.096	18.4078	17.6755
+	1.90936	0.493034	Q5BKY9	Q8N9E0;Q5BKY9;G3XAI9	F133B_HUMAN	FAM133B	Protein FAM133B	22.699	22.7695	22.6561	22.397	22.2281	22.0205
+	2.01239	0.24706	Q5BKZ1	Q5BKZ1;A0A0A0MRN4;Q5BKZ1-3	ZN326_HUMAN	ZNF326	DBIRD complex subunit ZNF326	21.801	21.7429	21.7722	21.4857	21.6252	21.464
+	2.89759	0.563882	Q5C9Z4	Q5C9Z4	NOM1_HUMAN	NOM1	Nucleolar MIF4G domain-containing protein 1	21.0431	21.0309	21.2309	20.4872	20.5543	20.5717
+	1.98601	0.644073	Q5H9R7;Q5H9R7-2;Q5H9R7-5;Q5H9R7-6	Q5H9R7;H7BXH2;E9PNN8;E9PKF6;Q5H9R7-2;Q5H9R7-3;Q5H9R7-4;Q5H9R7-5;Q5H9R7-6	PP6R3_HUMAN	PPP6R3	Serine/threonine-protein phosphatase 6 regulatory subunit 3	18.7108	18.562	18.3846	17.9868	17.7003	18.0381
+	1.59158	-0.276377	Q5H9U9	Q5H9U9;A0A804HKC9;Q5H9U9-2	DDX6L_HUMAN	DDX60L	Probable ATP-dependent RNA helicase DDX60-like	20.2424	20.4478	20.4669	20.7221	20.603	20.661
+	1.50077	1.30499	Q5JRA6;Q5JRA6-2	Q5JRA6;A0A0A0MRH6;Q5JRA6-2	TGO1_HUMAN	MIA3	Transport and Golgi organization protein 1 homolog	17.984	18.727	18.5741	17.4985	17.4114	16.4603
+	0.800973	-1.90368	Q5JSL3	Q5JSL3;A6NIW2;A0A0J9YW64	DOC11_HUMAN	DOCK11	Dedicator of cytokinesis protein 11	16.9845	18.7575	15.0767	18.6932	19.3815	18.455
+	1.04533	0.655549	Q5JTC6	Q5JTC6	AMER1_HUMAN	AMER1	APC membrane recruitment protein 1	17.1446	17.0192	17.235	16.4243	17.0005	16.0074
+	4.62911	-1.00447	Q5JTH9	Q5JTH9;Q5JTH9-2;Q5JTH9-3	RRP12_HUMAN	RRP12	RRP12-like protein	23.0883	23.1562	23.1637	24.2145	24.0894	24.1177
+	2.41676	0.290693	Q5JTW2-5	Q5JTW2;A8MST6;A0A2R8Y7U5;A0A2R8Y7A4;Q5JTW2-2;Q5JTW2-3;Q5JTW2-5;A0A2R8Y432;A0A2R8Y5W6;A0A2R8Y589;A0A2R8YCP0;A0A2U3TZI9	CEP78_HUMAN	CEP78	Isoform of Q5JTW2, Isoform 4 of Centrosomal protein of 78 kDa	19.0963	19.0326	19.1587	18.8686	18.7728	18.7741
+	1.30466	0.366561	Q5JVS0	Q5JVS0	HABP4_HUMAN	HABP4	Intracellular hyaluronan-binding protein 4	20.7903	20.4449	20.816	20.246	20.2805	20.4251
+	4.75793	1.37723	Q5M775-4	Q5M775;J3KRB9;J3KSG2;A0A7P0TB87;A0A7P0TBP2;Q5M775-4;A0A7P0Z4I1;A0A7I2YQJ3;A0A7I2V451;A0A7I2V416;A0A7I2V486;A0A7I2V562	CYTSB_HUMAN	SPECC1	Isoform of Q5M775, Isoform 4 of Cytospin-B	22.4008	22.4934	22.5502	21.0314	21.1506	21.1307
+	2.27518	0.68188	Q5SRE5	Q5SRE5;Q5SRE5-2	NU188_HUMAN	NUP188	Nucleoporin NUP188	20.152	20.2305	20.386	19.5659	19.4002	19.7568
+	3.19027	1.34054	Q5SVZ6	Q5SVZ6	ZMYM1_HUMAN	ZMYM1	Zinc finger MYM-type protein 1	20.2655	20.0842	20.0043	18.9993	18.7218	18.6112
+	3.4221	0.6759	Q5SW79	Q5SW79;H0YB92;H0Y2V6;Q5SW79-2;Q5SW79-3	CE170_HUMAN	CEP170	Centrosomal protein of 170 kDa	21.0534	20.9923	20.9334	20.2794	20.4167	20.2553
+	0.94074	1.86684	Q5SYE7-2	Q5SYE7;Q5SYE7-2	NHSL1_HUMAN	NHSL1	Isoform of Q5SYE7, Isoform 2 of NHS-like protein 1	17.1004	17.5856	17.1297	17.1511	15.0052	14.0589
+	4.17473	1.3354	Q5T0N5-3;Q5T0N5-4	Q5T0N5;A0A075B6Q2;Q5T0N5-2;Q5T0N5-3;Q5T0N5-4;Q5T0N5-5	FBP1L_HUMAN	FNBP1L	Isoform of Q5T0N5, Isoform 3 of Formin-binding protein 1-like	19.8193	19.7845	19.5799	18.3678	18.4344	18.3754
+	2.88112	1.12635	Q5T0W9	Q5T0W9	FA83B_HUMAN	FAM83B	Protein FAM83B	19.5752	19.5741	19.4302	18.1363	18.5412	18.523
+	3.30144	1.21248	Q5T1M5	Q5T1M5;A0A8I5QJ94;A0A8I5QJL3;Q5T1M5-2;A0A8I5KX71	FKB15_HUMAN	FKBP15	FK506-binding protein 15	18.0436	18.1695	17.8332	16.704	16.9251	16.7797
+	3.88247	0.389235	Q5T3I0	Q5T3I0;E9PAV9;A0A0A0MRK1;Q5T3I0-2;Q5T3I0-3;E9PPY4;F2Z3C6	GPTC4_HUMAN	GPATCH4	G patch domain-containing protein 4	22.324	22.4042	22.3544	21.991	21.9465	21.9773
+	3.72295	0.630472	Q5T4S7;Q5T4S7-3	Q5T4S7;Q5T4S7-2;Q5T4S7-3;Q5T4S7-4	UBR4_HUMAN	UBR4	E3 ubiquitin-protein ligase UBR4	20.5313	20.6279	20.5965	19.8817	19.9712	20.0113
+	5.22817	1.0455	Q5T5U3	Q5T5U3;E7ESW5;A0A805TBS0;Q5T5U3-3;A0A1B0GV73;A0A7P0TAS2;A0A087WW76	RHG21_HUMAN	ARHGAP21	Rho GTPase-activating protein 21	20.6773	20.7033	20.7206	19.6096	19.6423	19.7129
+	0.841572	1.44682	Q5T5Y3;Q5T5Y3-3	Q5T5Y3;Q5T5Y3-2;Q5T5Y3-3	CAMP1_HUMAN	CAMSAP1	Calmodulin-regulated spectrin-associated protein 1	17.5231	19.1284	18.6483	17.3402	17.8761	15.743
+	3.75678	0.994553	Q5T6F2	Q5T6F2;Q5JV08;A0A8C8KGQ8;A0A8C8MQ70	UBAP2_HUMAN	UBAP2	Ubiquitin-associated protein 2	23.3052	23.2737	23.4505	22.3755	22.4181	22.2522
+	3.86235	-0.449595	Q5T8I3	Q5T8I3;Q5T8I3-2	F102B_HUMAN	FAM102B	Protein FAM102B	19.4955	19.4673	19.4216	19.9564	19.8847	19.892
+	2.84366	0.897923	Q5T8P6	Q5T8P6;Q5T8P6-2;Q5T8P6-3;Q5T8P6-6;A0A087X0H9	RBM26_HUMAN	RBM26	RNA-binding protein 26	21.0594	20.9065	20.7549	20.1351	20.0117	19.8803
+	2.85763	0.681795	Q5T8P6-3	Q5T8P6-3;Q5T8P6-4;Q5T8P6-5;A0A087X0H9	RBM26_HUMAN	RBM26	Isoform of Q5T8P6, Isoform 3 of RNA-binding protein 26	17.6905	17.8957	17.6593	16.9887	17.0698	17.1417
+	1.82188	0.727177	Q5TAQ9	Q5TAQ9;Q5TAQ8;Q5TAQ9-2;V9GY54	DCAF8_HUMAN	DCAF8	DDB1- and CUL4-associated factor 8	19.9019	20.1126	20.1468	19.5097	19.4641	19.006
+	1.51533	0.562949	Q5TAX3	Q5TAX3;Q5TAX3-2;E9PKX1;A0A0C4DFM7	TUT4_HUMAN	TUT4	Terminal uridylyltransferase 4	19.3813	19.6732	19.3453	18.8352	18.7085	19.1671
+	3.05406	0.316649	Q5TB30	Q5TB30;H0YES2;Q5TB30-2	DEP1A_HUMAN	DEPDC1	DEP domain-containing protein 1A	20.4986	20.4627	20.4053	20.1417	20.1773	20.0976
+	2.91041	1.35626	Q5TC63	Q5TC63;Q5TC63-2;Q5TC63-3	GRTP1_HUMAN	GRTP1	Growth hormone-regulated TBC protein 1	21.1985	21.2658	21.5388	20.1427	19.7222	20.0694
+	3.91961	1.17665	Q5TCZ1	Q5TCZ1;Q5TCZ1-2;Q5TCZ1-3	SPD2A_HUMAN	SH3PXD2A	SH3 and PX domain-containing protein 2A	19.3745	19.4715	19.395	18.3557	18.2532	18.1021
+	2.90864	0.528737	Q5TEC6	Q5TEC6;A0A590UJL8	H37_HUMAN	H3-7	Histone H3-7	27.3076	27.338	27.2635	26.7338	26.8945	26.6946
+	1.50657	-1.4866	Q5U623;Q5U623-2	Q5U623;H3BPC9;Q5U623-2;F5GY73	MCAF2_HUMAN	ATF7IP2	Activating transcription factor 7-interacting protein 2	19.7375	19.7668	18.6241	20.5766	20.6331	21.3785
+	1.86716	1.18353	Q5VIR6	Q5VIR6;A0A7P0T9B2;A0A7P0T8A5;A0A7P0TBK3;A0A7P0TA53;A0A7P0TAE0;A0A7P0Z400	VPS53_HUMAN	VPS53	Vacuolar protein sorting-associated protein 53 homolog	24.9237	24.1454	24.3787	23.463	23.4566	22.9777
+	4.93779	0.638273	Q5VSY0	Q5VSY0;Q5VSY0-2	GKAP1_HUMAN	GKAP1	G kinase-anchoring protein 1	22.6564	22.7032	22.6312	22.0037	22.0319	22.0404
+	2.65827	2.91644	Q5VSY0-2	Q5VSY0-2	GKAP1_HUMAN	GKAP1	Isoform of Q5VSY0, Isoform 2 of G kinase-anchoring protein 1	18.3136	18.54	18.0112	15.213	14.794	16.1085
+	2.10582	2.03553	Q5VT66;Q5VT66-2	Q5VT66;Q5VT66-2;Q5VT66-3;H7BYZ9;A0A8Q3SHL7;A0A8Q3SHG3;A0A494C1P3	MARC1_HUMAN	MTARC1	Mitochondrial amidoxime-reducing component 1	18.8516	18.3518	17.8841	16.6853	16.5717	15.7238
+	1.28916	1.97501	Q5VTR2	Q5VTR2;C9J0A5;C9JXC9	BRE1A_HUMAN	RNF20	E3 ubiquitin-protein ligase BRE1A	18.7503	18.8773	18.2443	17.3796	15.2663	17.301
+	2.53633	1.1639	Q5VU97	Q5VU97;A0A0A0MQY7	CAHD1_HUMAN	CACHD1	VWFA and cache domain-containing protein 1	24.1334	23.9062	24.1403	22.8571	23.1942	22.6369
+	1.80891	-1.2205	Q5VV67;Q5VV67-2	Q5VV67;E7EVG6;X6R7H2;Q5VV67-2	PPRC1_HUMAN	PPRC1	Peroxisome proliferator-activated receptor gamma coactivator-related protein 1	15.6981	15.9915	16.6063	17.5646	17.0824	17.3105
+	2.26409	0.276766	Q5VW36	Q5VW36	FOCAD_HUMAN	FOCAD	Focadhesin	19.6877	19.8297	19.7662	19.4664	19.4445	19.5423
+	2.59057	0.848355	Q5VWN6	Q5VWN6;A0A2R8YH03;A0A8V8TMM4;A0A8V8TMN1;A0A8Q3SI84;A0A8Q3SI68	TASO2_HUMAN	TASOR2	Protein TASOR 2	16.4945	16.756	16.3655	15.7082	15.5912	15.7715
+	1.88352	0.235295	Q5VWQ0	Q5VWQ0;A0A0C4DH79;Q5VWQ0-4;A0A087WWP8	RSBN1_HUMAN	RSBN1	Lysine-specific demethylase 9	21.4481	21.4179	21.4922	21.3112	21.2046	21.1364
+	2.62221	1.06546	Q5VYK3	Q5VYK3;J3KN16;A0A804HJA4	ECM29_HUMAN	ECPAS	Proteasome adapter and scaffold protein ECM29	20.2581	20.2567	20.4516	19.2612	19.0092	19.4997
+	1.56224	0.544369	Q5VZE5	Q5VZE5	NAA35_HUMAN	NAA35	N-alpha-acetyltransferase 35, NatC auxiliary subunit	19.787	19.7884	19.7779	18.98	19.2077	19.5325
+	4.0399	1.3272	Q5VZK9;Q5VZK9-2	Q5VZK9;A0A0U1RQQ1;Q5VZK9-2;A0A8V8TRE2	CARL1_HUMAN	CARMIL1	F-actin-uncapping protein LRRC16A	20.9293	20.9677	20.8063	19.5118	19.7092	19.5007
+	4.20411	4.09683	Q5W0Q7	Q5W0Q7;Q5W0Q7-2	USPL1_HUMAN	USPL1	SUMO-specific isopeptidase USPL1	19.0249	19.3675	18.9674	14.6454	15.3143	15.1097
+	2.54067	0.901702	Q5XUX0	Q5XUX0;Q5XUX0-2;A0A0C4DGU8;H3BMH7	FBX31_HUMAN	FBXO31	F-box only protein 31	18.1993	17.8879	18.276	17.1802	17.1197	17.3582
+	2.94262	0.219324	Q63HN8	Q63HN8;A0A0A0MTC1;A0A0A0MTR7;Q63HN8-4	RN213_HUMAN	RNF213	E3 ubiquitin-protein ligase RNF213	20.8693	20.8678	20.9216	20.6821	20.6281	20.6906
+	3.34325	0.959694	Q63ZY3;Q63ZY3-3	Q5T7N3;Q63ZY3;Q63ZY3-2;Q63ZY3-3;K7ES05	KANK2_HUMAN	KANK2	KN motif and ankyrin repeat domain-containing protein 2	19.7108	19.7064	19.8703	18.6568	18.881	18.8707
+	4.56119	1.23722	Q641Q2	Q9Y4E1;Q641Q2;J3KP36;E7ESD2;A0A096LPC5;F8W7U3;Q9Y4E1-1;Q9Y4E1-2;Q9Y4E1-3;Q9Y4E1-5;Q9Y4E1-6;A0A0A0MT65;Q641Q2-2;A0A087WYF6	WAC2A_HUMAN	WASHC2A	WASH complex subunit 2A	19.4271	19.3266	19.3418	18.0442	18.1285	18.2111
+	1.78002	1.99149	Q643R3	Q643R3;H3BMK4	LPCT4_HUMAN	LPCAT4	Lysophospholipid acyltransferase LPCAT4	16.7341	17.3724	17.6983	15.6516	14.4486	15.7301
+	1.23345	2.68831	Q66K14;Q66K14-2	Q66K14;H0YB08;Q66K14-2	TBC9B_HUMAN	TBC1D9B	TBC1 domain family member 9B	17.7319	18.169	18.1246	14.0673	14.5652	17.3281
+	1.01771	1.16686	Q66K74;Q66K74-2	Q66K74;Q66K74-2	MAP1S_HUMAN	MAP1S	Microtubule-associated protein 1S	18.6852	18.6639	18.7095	18.2405	17.8504	16.4671
+	2.52076	0.392051	Q66PJ3-2	Q66PJ3;F8WEP2;F8WCT1;A0A8C8KBE9;H7BZV4;Q66PJ3-1;Q66PJ3-2;Q66PJ3-3;Q66PJ3-4;Q66PJ3-5;Q66PJ3-7;Q66PJ3-9;F5GYV5;A0A0C4DG62;A0A0C4DH18;Q66PJ3-10	AR6P4_HUMAN	ARL6IP4	Isoform of Q66PJ3, Isoform 2 of ADP-ribosylation factor-like protein 6-interacting protein 4	24.5914	24.6154	24.4598	24.2378	24.1286	24.1241
+	1.77797	0.496522	Q66PJ3;Q66PJ3-1	Q66PJ3;A0A8C8KBE9;Q66PJ3-1	AR6P4_HUMAN	ARL6IP4	ADP-ribosylation factor-like protein 6-interacting protein 4	17.6441	17.8869	17.7849	17.2177	17.1317	17.4769
+	1.58092	0.98466	Q684P5;Q684P5-2;Q684P5-3	Q684P5;A0A1B0GV05;Q684P5-2;Q684P5-3;A0A8V8TL16;A0A8V8TKZ8	RPGP2_HUMAN	RAP1GAP2	Rap1 GTPase-activating protein 2	18.5475	19.1035	19.1091	18.2256	18.07	17.5105
+	1.69175	-1.12286	Q68CQ4	Q68CQ4	UTP25_HUMAN	UTP25	U3 small nucleolar RNA-associated protein 25 homolog	20.0026	20.0318	19.1263	20.9397	20.8138	20.7758
+	2.56779	0.848742	Q68CZ2	Q63HR2;Q68CZ2;Q9HBL0;A0A2R8Y4T1;Q9HBL0-1;Q68CZ2-2;F8VV64;H0Y4U1;Q63HR2-2;Q63HR2-4;Q63HR2-5;Q63HR2-6;E9PF55;E9PGF5;A0A494C067	TENS3_HUMAN	TNS3	Tensin-3	20.4717	20.5592	20.3943	19.7225	19.767	19.3895
+	4.35269	0.682828	Q68D10	Q68D10;Q68D10-2;Q68D10-3	SPT2_HUMAN	SPTY2D1	Protein SPT2 homolog	22.8653	22.8254	22.7974	22.1119	22.206	22.1217
+	1.29736	-1.11818	Q68DA7	Q68DA7;H0YLM7;H0YM30;A0A5F9ZHS8;Q68DA7-5	FMN1_HUMAN	FMN1	Formin-1	22.15	22.4885	23.4378	23.9408	23.5688	23.9212
+	1.21849	0.554907	Q68E01-2	Q68E01;A0A096LNW8;H0Y8Z1;Q68E01-2;Q68E01-3	INT3_HUMAN	INTS3	Isoform of Q68E01, Isoform 2 of Integrator complex subunit 3	19.0198	19.1084	18.548	18.1767	18.2522	18.5826
+	2.99445	1.10386	Q68EM7;Q68EM7-2;Q68EM7-5;Q68EM7-6	Q68EM7;C9IZD3;Q68EM7-2;Q68EM7-4;Q68EM7-5;Q68EM7-6;I3L4P0;I3L1S9	RHG17_HUMAN	ARHGAP17	Rho GTPase-activating protein 17	20.0937	20.0338	19.864	18.9217	19.0657	18.6924
+	2.12683	-1.19566	Q69YN2	Q69YN2;Q69YN2-2;Q69YN2-3	C19L1_HUMAN	CWF19L1	CWF19-like protein 1	15.9522	16.012	15.4735	17.1616	17.1894	16.6737
+	4.17124	1.21418	Q69YQ0;Q69YQ0-2	Q69YQ0;C9J8U1;A0A494C1J1;Q69YQ0-2;F8WAN1	CYTSA_HUMAN	SPECC1L	Cytospin-A	20.7712	20.7538	20.5973	19.4605	19.4388	19.5804
+	1.36321	-0.571255	Q6AI08	Q6AI08;K7EIX2;K7ELR8;K7ESP5	HEAT6_HUMAN	HEATR6	HEAT repeat-containing protein 6	16.5653	16.5453	16.1762	16.8455	16.8561	17.2989
+	0.871098	-2.76816	Q6AWC2;Q6AWC2-4;Q6AWC2-5;Q6AWC2-6	Q6AWC2;Q6AWC2-2;Q6AWC2-3;Q6AWC2-4;Q6AWC2-5;Q6AWC2-6	WWC2_HUMAN	WWC2	Protein WWC2	14.8786	19.6126	15.6389	19.3848	19.2218	19.828
+	1.03165	1.11304	Q6DD88	Q6DD88;F5H6I7	ATLA3_HUMAN	ATL3	Atlastin-3	18.7394	18.5475	17.8791	16.412	17.7896	17.6252
+	3.11103	0.305168	Q6DKI1	Q6DKI1;Q6DKI1-2;R4GMU7	RL7L_HUMAN	RPL7L1	60S ribosomal protein L7-like 1	23.2699	23.2267	23.272	22.9763	22.8919	22.985
+	2.35251	0.859934	Q6DN12;Q6DN12-2	Q6DN12;Q6DN12-2;Q6DN12-3;Q6DN12-4	MCTP2_HUMAN	MCTP2	Multiple C2 and transmembrane domain-containing protein 2	19.2362	18.8053	18.7845	18.1059	18.0404	18.1
+	1.27582	1.15068	Q6FI81;Q6FI81-3	Q6FI81;H3BV90;Q6FI81-2;Q6FI81-3	CPIN1_HUMAN	CIAPIN1	Anamorsin	18.9223	18.7166	18.7963	18.0449	18.1138	16.8244
+	1.28101	0.850657	Q6GQQ9;Q6GQQ9-2	Q6GQQ9;Q6GQQ9-2	OTU7B_HUMAN	OTUD7B	OTU domain-containing protein 7B	19.2861	19.0167	19.112	18.4703	17.6991	18.6936
+	1.71903	-0.289412	Q6I9Y2	Q6I9Y2	THOC7_HUMAN	THOC7	THO complex subunit 7 homolog	20.7383	20.5547	20.4883	20.8699	20.9123	20.8673
+	1.98307	3.14452	Q6IA17;Q6IA17-2	Q6IA17;Q6IA17-2;C9JFX4	SIGIR_HUMAN	SIGIRR	Single Ig IL-1-related receptor	17.737	17.9365	17.428	14.4553	15.7716	13.441
+	1.40427	0.56362	Q6IAA8	Q6IAA8;H0YFI1;F5GX19;F5H3Y3;F5H479	LTOR1_HUMAN	LAMTOR1	Ragulator complex protein LAMTOR1	18.1167	18.2563	18.5238	17.7823	17.4658	17.9578
+	0.975083	1.93932	Q6IBS0	Q6IBS0;D6RG15;A0A7I2V2U8;A0A7I2V5B1;A0A7I2V5D3;H0Y858	TWF2_HUMAN	TWF2	Twinfilin-2	17.281	16.9494	17.9405	14.5701	14.5614	17.2214
+	2.10149	-0.6619	Q6IN84	Q6IN84;Q6IN84-2;A0A087WZC1	MRM1_HUMAN	MRM1	rRNA methyltransferase 1, mitochondrial	18.7822	18.7644	18.9165	19.2644	19.4849	19.6995
+	4.24115	0.911837	Q6IQ21	Q6IQ21	ZN770_HUMAN	ZNF770	Zinc finger protein 770	19.7054	19.6568	19.6784	18.7851	18.8437	18.6764
+	3.7751	1.59402	Q6IQ49;Q6IQ49-2	Q6IQ49;Q6IQ49-2;Q6IQ49-3	SDE2_HUMAN	SDE2	Splicing regulator SDE2	20.0582	20.3546	20.0962	18.711	18.4721	18.5438
+	3.85554	1.18106	Q6KC79	Q6KC79;A0A590UJS4;Q6KC79-2;Q6KC79-3	NIPBL_HUMAN	NIPBL	Nipped-B-like protein	18.8791	18.8558	18.7158	17.7482	17.6366	17.5228
+	1.28487	0.536379	Q6N069	Q6N069;Q6N069-2;Q6N069-3;Q6N069-4;Q6N069-5	NAA16_HUMAN	NAA16	N-alpha-acetyltransferase 16, NatA auxiliary subunit	20.2798	20.4204	20.8236	19.8048	19.9349	20.175
+	1.94599	0.776693	Q6NUQ4	Q6NUQ4;H7C0H8;Q6NUQ4-2	TM214_HUMAN	TMEM214	Transmembrane protein 214	19.0793	19.4089	19.4827	18.6149	18.3077	18.7183
+	0.885492	1.20068	Q6NXR4	Q6NXR4;E5RIH5	TTI2_HUMAN	TTI2	TELO2-interacting protein 2	19.2512	17.8208	17.153	16.855	17.1032	16.6647
+	1.07356	0.497121	Q6NYC1;Q6NYC1-2;Q6NYC1-3	Q6NYC1;B2WTI3;B2WTI4;Q6NYC1-2;Q6NYC1-3;K7EJU9	JMJD6_HUMAN	JMJD6	Bifunctional arginine demethylase and lysyl-hydroxylase JMJD6	20.6816	20.6413	20.1365	20.0126	20.2002	19.7553
+	3.73616	0.788627	Q6NZI2	Q6NZI2;Q6NZI2-2;Q6NZI2-3	CAVN1_HUMAN	CAVIN1	Caveolae-associated protein 1	21.0955	20.9908	20.8998	20.2087	20.236	20.1755
+	1.41423	0.415602	Q6P0N0	Q6P0N0;H7C1S6;G5E9K5;Q6P0N0-2	M18BP_HUMAN	MIS18BP1	Mis18-binding protein 1	17.7833	17.8569	17.9817	17.2159	17.5347	17.6246
+	1.47776	0.594189	Q6P0Q8	Q6P0Q8;V9GXZ1;A0A669KBJ4;Q6P0Q8-2	MAST2_HUMAN	MAST2	Microtubule-associated serine/threonine-protein kinase 2	18.3284	18.2603	18.187	17.943	17.7275	17.3226
+	2.67921	-0.320251	Q6P158	Q6P158;H7C109	DHX57_HUMAN	DHX57	Putative ATP-dependent RNA helicase DHX57	24.048	24.0923	23.9501	24.3632	24.3707	24.3173
+	3.5802	1.42077	Q6P161	Q6P161	RM54_HUMAN	MRPL54	39S ribosomal protein L54, mitochondrial	20.5369	20.4518	20.4638	18.8407	19.2156	19.134
+	6.51722	-3.91058	Q6P1J9	Q6P1J9;A0A1B0GUB2	CDC73_HUMAN	CDC73	Parafibromin	20.9976	20.9837	21.1357	24.9454	25.0088	24.8946
+	1.38822	-1.28112	Q6P1K2-4	Q6P1K2;Q6P1K2-3;Q6P1K2-4;Q6P1K2-5;Q6P1K2-6;U3KQ54	PMF1_HUMAN	PMF1	Isoform of Q6P1K2, Isoform 4 of Polyamine-modulated factor 1	16.1323	14.9118	15.7418	16.4326	16.9578	17.2388
+	3.13267	1.77662	Q6P1L5	Q6P1L5;Q6P1L5-2	F117B_HUMAN	FAM117B	Protein FAM117B	18.507	18.0895	18.388	16.7498	16.2702	16.6347
+	1.22	2.38006	Q6P1L8	Q6P1L8	RM14_HUMAN	MRPL14	39S ribosomal protein L14, mitochondrial	18.6158	19.3291	18.7904	15.3736	18.2838	15.9376
+	2.11658	0.970502	Q6P1Q0;Q6P1Q0-7	Q6P1Q0;H0YIV5;F8VZA2;F8VVQ3;F8VP71;Q6P1Q0-2;Q6P1Q0-4;Q6P1Q0-7	LTMD1_HUMAN	LETMD1	LETM1 domain-containing protein 1	19.3167	19.9283	19.7228	18.7519	18.5332	18.7712
+	3.31022	0.469622	Q6P1X5	Q6P1X5;A0A8I5QJD7;A0A8I5QJR0;H0YC37;A0A8I5KPW0;A0A8I5KR26;A0A8I5KUQ2;A0A8I5KSY6;A0A8I5KV60;A0A8I5KXP3	TAF2_HUMAN	TAF2	Transcription initiation factor TFIID subunit 2	22.1322	22.2575	22.1597	21.7043	21.6761	21.7602
+	3.18131	0.684709	Q6P2E9	Q6P2E9	EDC4_HUMAN	EDC4	Enhancer of mRNA-decapping protein 4	21.1567	21.1763	21.1297	20.3335	20.5083	20.5667
+	3.14279	0.347801	Q6P2Q9	Q6P2Q9;I3L0J9	PRP8_HUMAN	PRPF8	Pre-mRNA-processing-splicing factor 8	22.7148	22.7902	22.7687	22.4689	22.3851	22.3762
+	1.62531	0.588322	Q6P3X3	Q6P3X3	TTC27_HUMAN	TTC27	Tetratricopeptide repeat protein 27	18.8772	19.2546	19.4001	18.6697	18.6152	18.482
+	1.28906	3.09547	Q6P4F7	Q6P4F7;Q6P4F7-3;Q6P4F7-2;H3BR51;H3BQ41;A0A8I5KWH8;A0A8I5KS94	RHGBA_HUMAN	ARHGAP11A	Rho GTPase-activating protein 11A	18.673	18.8883	19.1736	17.8601	14.0157	15.5727
+	2.47778	0.844689	Q6P582	Q6P582;Q6NZ67;H7BZ50;B8ZZ87;H7C173;A0A494C0V9	MZT2A_HUMAN	MZT2A	Mitotic-spindle organizing protein 2A	19.4418	19.1508	19.5813	18.4544	18.6008	18.5847
+	1.75106	-0.298151	Q6P5R6	Q6P5R6;C9JYQ9;H0Y8C2	RL22L_HUMAN	RPL22L1	60S ribosomal protein L22-like 1	24.1232	24.2136	24.0027	24.5029	24.3783	24.3527
+	1.56387	2.21099	Q6P6C2;Q6P6C2-1	Q6P6C2;Q6P6C2-1;Q6P6C2-3	ALKB5_HUMAN	ALKBH5	RNA demethylase ALKBH5	18.0505	17.9974	17.6832	16.5912	14.4576	16.0494
+	2.27408	0.677396	Q6P996;Q6P996-4;Q6P996-5	Q6P996;J3KNK7;H3BND4;H3BNL6;Q86XE2;Q6P996-2;Q6P996-3;Q6P996-4;Q6P996-5	PDXD1_HUMAN	PDXDC1	Pyridoxal-dependent decarboxylase domain-containing protein 1	18.4112	18.6908	18.6898	18.0518	17.7736	17.9343
+	8.92852	-3.67973	Q6PD62	Q6PD62	CTR9_HUMAN	CTR9	RNA polymerase-associated protein CTR9 homolog	21.1104	21.1033	21.0752	24.7817	24.7591	24.7872
+	3.19527	0.348882	Q6PGP7	Q6PGP7;D6RCE2;H0Y915;A0A8V8TN92;A0A8V8TNA2;A0A8V8TNJ4;A0A8V8TNJ9;A0A8V8TNK4;A0A8V8TNK9;A0A8V8TLR0;A0A8V8TLS3;A0A8V8TLT2;A0A8V8TLT7;A0A8V8TLU2;A0A8V8TLU5;A0A8V8TM98;A0A8V8TMA3;A0A8V8TMA8;A0A8V8TMB2	SKI3_HUMAN	SKIC3	SKI3 subunit of superkiller complex protein	24.9078	24.9114	24.9432	24.5674	24.515	24.6334
+	2.77187	0.913248	Q6PI48	Q6PI48;A0A3B3IS54;A0A3B3ISK7;A0A3B3IT01;A0A3B3ITK9;A0A3B3ITS3;A0A3B3IS01	SYDM_HUMAN	DARS2	Aspartate--tRNA ligase, mitochondrial	18.7361	18.6001	18.7055	17.5389	17.8657	17.8973
+	3.68323	0.896826	Q6PIW4	Q6PIW4;C9JKI6	FIGL1_HUMAN	FIGNL1	Fidgetin-like protein 1	19.6758	19.4638	19.505	18.6776	18.6746	18.602
+	0.952323	-0.801881	Q6PJ69	Q6PJ69	TRI65_HUMAN	TRIM65	Tripartite motif-containing protein 65	21.3632	21.4889	20.2735	21.9811	21.8458	21.7044
+	2.74458	4.3149	Q6PJF5-2	Q6PJF5;Q6PJF5-2;K7EIY3;K7EKI1;K7EKA3;K7EQ53;K7EPV3	RHDF2_HUMAN	RHBDF2	Isoform of Q6PJF5, Isoform 2 of Inactive rhomboid protein 2	19.3791	20.3469	19.8397	14.688	15.4691	16.4639
+	1.74032	0.517724	Q6PJG2	Q6PJG2;A0A1C7CYX1	MDEAS_HUMAN	MIDEAS	Mitotic deacetylase-associated SANT domain protein	19.9673	20.2251	20.3777	19.7774	19.5675	19.6721
+	1.75376	0.251617	Q6PK04	Q6PK04;I3L4F6;I3L0U5	CC137_HUMAN	CCDC137	Coiled-coil domain-containing protein 137	22.85	22.9165	22.8276	22.6548	22.6876	22.4969
+	3.5105	0.644255	Q6PL18	Q6PL18	ATAD2_HUMAN	ATAD2	ATPase family AAA domain-containing protein 2	20.5654	20.5567	20.5496	20.0032	19.9225	19.8133
+	3.18953	0.82794	Q6R327-3	Q6R327;Q6R327-3	RICTR_HUMAN	RICTOR	Isoform of Q6R327, Isoform 3 of Rapamycin-insensitive companion of mTOR	19.845	20.0494	20.0695	19.1721	19.235	19.0729
+	2.58538	0.685022	Q6RFH5	Q6RFH5;Q6RFH5-2;F5GYL6	WDR74_HUMAN	WDR74	WD repeat-containing protein 74	20.6888	20.4437	20.7694	19.9043	20.0059	19.9367
+	3.91717	0.635143	Q6SJ93	Q6SJ93;Q6SJ93-2	F111B_HUMAN	FAM111B	Serine protease FAM111B	19.6183	19.5579	19.4905	18.8946	18.9639	18.9027
+	3.22861	0.815455	Q6SPF0	Q6SPF0;E9PIW9	SAMD1_HUMAN	SAMD1	Sterile alpha motif domain-containing protein 1	21.7839	21.7404	21.8645	20.926	21.1276	20.8889
+	2.09088	1.00842	Q6T4R5;Q6T4R5-2	Q6T4R5;Q6T4R5-2;Q6T4R5-3;Q6T4R5-4;A0A087WU78	NHS_HUMAN	NHS	Actin remodeling regulator NHS	19.5423	19.5837	19.6799	18.1953	18.7311	18.8541
+	3.41555	0.576979	Q6UN15-3	Q6UN15;Q6UN15-3;Q6UN15-4;Q6UN15-5;A0A0B4J203	FIP1_HUMAN	FIP1L1	Isoform of Q6UN15, Isoform 3 of Pre-mRNA 3'-end-processing factor FIP1	21.0324	21.1345	20.9908	20.4241	20.4739	20.5288
+	2.10558	0.81281	Q6UUV7	Q6UUV7;Q6UUV7-3	CRTC3_HUMAN	CRTC3	CREB-regulated transcription coactivator 3	20.1669	20.608	20.2141	19.6876	19.4605	19.4025
+	1.61462	0.46234	Q6UY14;Q6UY14-2;Q6UY14-3	Q6UY14;Q6UY14-2;Q6UY14-3;A0A669KBE7	ATL4_HUMAN	ADAMTSL4	ADAMTS-like protein 4	15.8187	15.9313	15.5115	15.225	15.3566	15.2929
+	2.25584	0.698392	Q6VY07	Q6VY07;B4DF77;E9PNZ9;Q6VY07-2	PACS1_HUMAN	PACS1	Phosphofurin acidic cluster sorting protein 1	19.9167	19.8847	19.7755	18.9254	19.3281	19.2283
+	4.62907	1.13386	Q6WCQ1-2	Q6WCQ1;J3KSW8;H0Y7E2;H0Y2S9;A0A494BZV2;H7C3G6;K7EL39;Q6WCQ1-2;Q6WCQ1-3;J3QRL2	MPRIP_HUMAN	MPRIP	Isoform of Q6WCQ1, Isoform 2 of Myosin phosphatase Rho-interacting protein	24.1728	24.1701	24.0449	22.9532	23.0481	22.9849
+	3.81677	3.49796	Q6WKZ4;Q6WKZ4-3	Q6WKZ4;Q6WKZ4-3;Q6WKZ4-5	RFIP1_HUMAN	RAB11FIP1	Rab11 family-interacting protein 1	18.5594	18.5304	18.2106	14.7874	14.6431	15.376
+	1.96737	0.8575	Q6Y2X3	Q6Y2X3	DJC14_HUMAN	DNAJC14	DnaJ homolog subfamily C member 14	19.6035	19.601	19.9778	18.589	19.0601	18.9608
+	4.46522	0.821882	Q6Y7W6	Q6Y7W6;I1E4Y6;C9J0V6;E7ESB6;C9JXQ0;F8WCD5;C9JPV7;C9JRZ2;Q6Y7W6-3;Q6Y7W6-4;Q6Y7W6-5;C9JHW1;C9JHT0	GGYF2_HUMAN	GIGYF2	GRB10-interacting GYF protein 2	22.4261	22.4624	22.5522	21.6455	21.6881	21.6415
+	4.40824	1.19329	Q6YHK3	Q6YHK3;Q6YHK3-2;Q6YHK3-3;Q6YHK3-4	CD109_HUMAN	CD109	CD109 antigen	23.3197	23.2792	23.4381	22.0811	22.1691	22.207
+	0.783437	-2.3658	Q6YHU6	Q6YHU6;B5MC89;B6ZDE5;Q6YHU6-3;Q6YHU6-5;Q6YHU6-6;F5H3M9	THADA_HUMAN	THADA	Thyroid adenoma-associated protein	16.5231	20.968	17.2423	20.57	20.2743	20.9866
+	2.17611	-2.91382	Q6ZN18;Q6ZN18-2	Q6ZN18;Q6ZN18-2;Q6ZN18-3;G5EA50;F5GZR7;A0A669KBL4;A0A669KBC9	AEBP2_HUMAN	AEBP2	Zinc finger protein AEBP2	16.3987	16.2974	14.7069	18.9181	18.4622	18.7641
+	1.85923	2.99748	Q6ZN66	Q6ZN66;Q6ZN66-2	GBP6_HUMAN	GBP6	Guanylate-binding protein 6	17.6487	17.4548	18.0444	16.1071	14.0061	14.0423
+	2.23002	0.504862	Q6ZRV2	Q6ZRV2;J3KPS2;A0A494C1T9	FA83H_HUMAN	FAM83H	Protein FAM83H	20.2838	20.3059	20.2123	19.737	19.6207	19.9296
+	2.28651	0.461133	Q6ZRY4	Q6ZRY4	RBPS2_HUMAN	RBPMS2	RNA-binding protein with multiple splicing 2	19.605	19.4988	19.3456	19.0136	18.9656	19.0869
+	2.59318	0.418646	Q6ZUT1;Q6ZUT1-2	Q6ZUT1;Q6ZUT1-2;Q6ZUT1-3;E9PSC8;E9PQL5;E9PKA8	NKAP1_HUMAN	NKAPD1	Uncharacterized protein NKAPD1	20.7744	20.6906	20.7883	20.3815	20.3918	20.224
+	2.52889	1.22083	Q6ZVD8;Q6ZVD8-3	Q6ZVD8;H3BS75;H3BMS5;Q6ZVD8-2;Q6ZVD8-3;I3L187	PHLP2_HUMAN	PHLPP2	PH domain leucine-rich repeat-containing protein phosphatase 2	24.0743	23.8345	23.7985	22.7687	22.9192	22.357
+	2.34909	0.868206	Q6ZYL4	Q6ZYL4	TF2H5_HUMAN	GTF2H5	General transcription factor IIH subunit 5	18.9761	18.8411	19.2376	18.2379	18.2526	17.9596
+	3.41037	0.534335	Q709F0	Q709F0;Q709F0-2;Q709F0-3;H0Y9C6	ACD11_HUMAN	ACAD11	Acyl-CoA dehydrogenase family member 11	21.5963	21.6029	21.5437	21.0266	20.9809	21.1323
+	3.25089	1.4268	Q70E73	Q70E73;Q70E73-2;Q70E73-5;C9J164	RAPH1_HUMAN	RAPH1	Ras-associated and pleckstrin homology domains-containing protein 1	19.0683	19.2399	18.8002	17.6991	17.6412	17.4877
+	2.86976	0.995232	Q70EL1	Q70EL1;Q70EL1-7;Q70EL1-8;Q70EL1-9;A0A7P0T9K1;A0A7P0T9N2;Q70EL1-10;A0A8I5KTP4	UBP54_HUMAN	USP54	Inactive ubiquitin carboxyl-terminal hydrolase 54	17.9296	17.8609	17.8982	16.9235	16.6768	17.1027
+	2.53951	0.437334	Q70EL4;Q70EL4-4	Q70EL4;Q70EL4-2;Q70EL4-3;Q70EL4-4;V9GZ20;V9GXZ5	UBP43_HUMAN	USP43	Ubiquitin carboxyl-terminal hydrolase 43	20.1214	20.1601	19.9537	19.6486	19.5985	19.6761
+	1.94947	0.697978	Q71DI3	Q5TEC6;P84243;P68431;Q71DI3;Q16695;Q6NXT2;B4DEB1;A0A590UJJ6;K7EK07;K7EMV3;K7EP01;K7ES00	H32_HUMAN	H3C13	Histone H3.2	32.454	32.2254	32.0026	31.5385	31.6756	31.3739
+	4.33598	0.51409	Q71RC2;Q71RC2-4	Q92615;Q71RC2;Q71RC2-7;Q71RC2-2;Q71RC2-3;Q71RC2-4;Q71RC2-5;Q71RC2-6;X6RLN4;A0A8I5KVU2;A0A8I5KWN8;Q96J85	LARP4_HUMAN	LARP4	La-related protein 4	25.431	25.39	25.4634	24.8826	24.941	24.9184
+	3.22504	-0.251176	Q71UM5	Q71UM5;H0YMV8;C9JLI6	RS27L_HUMAN	RPS27L	40S ribosomal protein S27-like	26.6182	26.6443	26.6999	26.8939	26.9005	26.9216
+	2.85248	0.906137	Q76FK4;Q76FK4-4	Q76FK4;Q76FK4-2;Q76FK4-4;F8WE42;F5H101	NOL8_HUMAN	NOL8	Nucleolar protein 8	19.5397	19.5241	19.2476	18.5787	18.4022	18.6121
+	6.11153	-2.18041	Q7KZ85	Q7KZ85;Q7KZ85-2	SPT6H_HUMAN	SUPT6H	Transcription elongation factor SPT6	20.0806	20.1422	20.0114	22.2283	22.2862	22.261
+	3.31382	0.515059	Q7KZF4	Q7KZF4	SND1_HUMAN	SND1	Staphylococcal nuclease domain-containing protein 1	23.3073	23.2287	23.3903	22.769	22.8258	22.7863
+	2.67779	0.493069	Q7KZI7-16	Q7KZI7;E7ETY4;E9PC69;A0A0A0MRU9;Q7KZI7-2;Q7KZI7-3;Q7KZI7-4;Q7KZI7-5;Q7KZI7-6;Q7KZI7-7;Q7KZI7-8;Q7KZI7-9;A0A7I2YQF3;A0A7I2YQR3;Q7KZI7-10;Q7KZI7-11;Q7KZI7-12;Q7KZI7-13;Q7KZI7-14;Q7KZI7-15;Q7KZI7-16	MARK2_HUMAN	MARK2	Isoform of Q7KZI7, Isoform 16 of Serine/threonine-protein kinase MARK2	21.2325	21.0994	21.1419	20.7055	20.7377	20.5513
+	2.7699	0.400632	Q7L014	Q7L014;A0A0C4DG89	DDX46_HUMAN	DDX46	Probable ATP-dependent RNA helicase DDX46	24.9714	25.0481	24.914	24.6301	24.5065	24.595
+	1.79891	0.327353	Q7L0Y3	Q7L0Y3	TM10C_HUMAN	TRMT10C	tRNA methyltransferase 10 homolog C	23.6063	23.543	23.384	23.2764	23.1562	23.1186
+	3.13203	1.45105	Q7L1Q6;Q7L1Q6-3;Q7L1Q6-4	Q7L1Q6;C9IZ80;Q7L1Q6-2;Q7L1Q6-3;Q7L1Q6-4	5MP2_HUMAN	BZW1	eIF5-mimic protein 2	20.6622	20.5301	20.6491	19.2672	19.3539	18.8671
+	4.3555	-0.577909	Q7L2H7	Q7L2H7;J3KNJ2;E9PN86	EIF3M_HUMAN	EIF3M	Eukaryotic translation initiation factor 3 subunit M	23.6462	23.6218	23.6537	24.2593	24.1632	24.2329
+	2.90146	0.423937	Q7L4I2	Q7L4I2;Q7L4I2-2	RSRC2_HUMAN	RSRC2	Arginine/serine-rich coiled-coil protein 2	22.7985	22.8781	22.8978	22.3542	22.4493	22.4991
+	3.27473	0.960119	Q7L576	Q7L576;A0A0G2JR96;A0A0G2JQT1;A0A087WVZ5	CYFP1_HUMAN	CYFIP1	Cytoplasmic FMR1-interacting protein 1	21.4048	21.5238	21.2738	20.3191	20.4898	20.5131
+	2.66345	0.89896	Q7L7X3	Q7L7X3;Q7L7X3-3;J3QS76	TAOK1_HUMAN	TAOK1	Serine/threonine-protein kinase TAO1	21.0052	20.9356	20.6549	20.0948	19.9512	19.8528
+	3.72059	1.2259	Q7L8L6	Q7L8L6	FAKD5_HUMAN	FASTKD5	FAST kinase domain-containing protein 5, mitochondrial	19.4697	19.4248	19.2083	18.1529	18.2151	18.0571
+	3.3341	0.651471	Q7LBC6	Q7LBC6;Q7LBC6-2;Q7LBC6-3	KDM3B_HUMAN	KDM3B	Lysine-specific demethylase 3B	19.6081	19.5502	19.6067	18.823	18.9671	19.0205
+	4.92898	0.842601	Q7LGA3	Q7LGA3;A0A8I5QKN0;K7EP71;A0A8I5KR52;A0A8I5KW95;Q7LGA3-2;Q7LGA3-3	HS2ST_HUMAN	HS2ST1	Heparan sulfate 2-O-sulfotransferase 1	20.3158	20.3635	20.4207	19.5065	19.5304	19.5355
+	3.64759	1.07049	Q7RTP6	Q7RTP6;Q7RTP6-2;Q7RTP6-3;Q7RTP6-4;Q7RTP6-5;A0A5F9ZHV5	MICA3_HUMAN	MICAL3	[F-actin]-monooxygenase MICAL3	19.7491	19.7009	19.8167	18.576	18.8355	18.6437
+	3.56239	0.90135	Q7RTV0	Q7RTV0	PHF5A_HUMAN	PHF5A	PHD finger-like domain-containing protein 5A	22.078	21.9946	22.2476	21.2216	21.2018	21.1928
+	2.09022	1.082	Q7Z2K8	Q7Z2K8	GRIN1_HUMAN	GPRIN1	G protein-regulated inducer of neurite outgrowth 1	18.0801	17.7437	18.4746	17.1485	16.9708	16.9331
+	1.95614	0.30625	Q7Z333	Q7Z333;Q7Z333-3;Q7Z333-4;X6RI79	SETX_HUMAN	SETX	Probable helicase senataxin	19.8219	19.9256	19.7787	19.4542	19.5186	19.6347
+	1.62031	2.64679	Q7Z3B1	Q7Z3B1;Q7Z3B1-2	NEGR1_HUMAN	NEGR1	Neuronal growth regulator 1	18.7006	18.684	18.9678	14.6764	17.0896	16.6459
+	1.10114	1.89945	Q7Z3C6	Q7Z3C6;Q7Z3C6-2;H7C152	ATG9A_HUMAN	ATG9A	Autophagy-related protein 9A	18.3942	18.4742	18.6982	15.0594	17.0639	17.7449
+	1.60486	0.980508	Q7Z3E2	Q7Z3E2	CC186_HUMAN	CCDC186	Coiled-coil domain-containing protein 186	21.2432	21.1869	21.1551	20.2932	20.6532	19.6972
+	0.918446	-1.78696	Q7Z3S7-4;Q7Z3S7-6	Q7Z3S7;E7EUE0;K7EJY1;Q7Z3S7-2;Q7Z3S7-4;Q7Z3S7-5;Q7Z3S7-6	CA2D4_HUMAN	CACNA2D4	Isoform of Q7Z3S7, Isoform 4 of Voltage-dependent calcium channel subunit alpha-2/delta-4	14.8526	14.9281	17.5154	17.069	17.8543	17.7336
+	1.04321	1.03929	Q7Z406-2;Q7Z406-6	Q7Z406;M0QY43;Q7Z406-2;Q7Z406-4;Q7Z406-5;Q7Z406-6	MYH14_HUMAN	MYH14	Isoform of Q7Z406, Isoform 2 of Myosin-14	22.6797	22.8286	21.3912	21.2037	21.1163	21.4617
+	4.27439	0.861106	Q7Z417	Q7Z417	NUFP2_HUMAN	NUFIP2	FMR1-interacting protein NUFIP2	24.8521	24.8047	24.9257	23.9978	24.0551	23.9462
+	4.08701	0.808577	Q7Z460-4	Q7Z460;F8WA11;H0Y5T1;Q7Z460-2;Q7Z460-3;Q7Z460-4;Q7Z460-5;A0A8V8TRF6;A0A8V8TQK9;A0A8V8TLP7	CLAP1_HUMAN	CLASP1	Isoform of Q7Z460, Isoform 4 of CLIP-associating protein 1	20.7113	20.807	20.768	19.9467	20.0275	19.8864
+	2.93921	0.341397	Q7Z478	Q7Z478	DHX29_HUMAN	DHX29	ATP-dependent RNA helicase DHX29	22.5241	22.5891	22.5588	22.2018	22.1608	22.2852
+	1.74214	0.618103	Q7Z4H7	Q7Z4H7;Q7Z4H7-2;Q7Z4H7-3;Q5VY60	HAUS6_HUMAN	HAUS6	HAUS augmin-like complex subunit 6	18.1739	18.675	18.4535	17.9513	17.7438	17.753
+	2.85245	0.630095	Q7Z4S6;Q7Z4S6-2;Q7Z4S6-4;Q7Z4S6-5	Q7Z4S6;H0YIM6;H0YHG9;H0YHT2;H0YI78;A0A1B0GV47;Q7Z4S6-2;Q7Z4S6-3;Q7Z4S6-4;Q7Z4S6-5;Q7Z4S6-6	KI21A_HUMAN	KIF21A	Kinesin-like protein KIF21A	21.2073	21.0422	20.9572	20.4663	20.4746	20.3755
+	2.31662	-0.772805	Q7Z4V5	Q7Z4V5;Q9Y3E1;Q7Z4V5-2;Q7Z4V5-3;Q7Z4V5-4;M0R0J3	HDGR2_HUMAN	HDGFL2	Hepatoma-derived growth factor-related protein 2	22.4653	22.3689	22.2447	23.2826	23.2213	22.8933
+	1.04808	-0.61947	Q7Z589;Q7Z589-4;Q7Z589-5;Q7Z589-6;Q7Z589-7	Q7Z589;H0YCS3;E9PMC9;Q7Z589-2;Q7Z589-4;Q7Z589-5;Q7Z589-6;Q7Z589-7	EMSY_HUMAN	EMSY	BRCA2-interacting transcriptional repressor EMSY	15.0357	15.5777	15.6163	15.6256	16.1706	16.2918
+	2.13153	0.27958	Q7Z5J4	Q7Z5J4;A8MXE8;Q7Z5J4-2;Q7Z5J4-3;Q7Z5J4-4	RAI1_HUMAN	RAI1	Retinoic acid-induced protein 1	20.4002	20.4186	20.5717	20.161	20.2029	20.1879
+	3.23487	0.544369	Q7Z6E9	Q7Z6E9;H3BUN0;H3BSK8;Q7Z6E9-2;Q7Z6E9-4;A0A087WY32	RBBP6_HUMAN	RBBP6	E3 ubiquitin-protein ligase RBBP6	21.0343	21.0536	21.0351	20.5335	20.5671	20.3892
+	1.2655	-0.520789	Q7Z6I8;Q7Z6I8-2	Q7Z6I8;H0YAE0;Q7Z6I8-2	CE024_HUMAN	C5orf24	UPF0461 protein C5orf24	16.5334	16.2266	16.4013	16.5803	16.9842	17.1593
+	1.86347	-3.76036	Q7Z6R9	Q7Z6R9	AP2D_HUMAN	TFAP2D	Transcription factor AP-2-delta	15.6638	15.1393	15.5172	19.5228	17.5381	20.5404
+	2.5492	0.978385	Q7Z6Z7;Q7Z6Z7-2;Q7Z6Z7-3	Q7Z6Z7;Q7Z6Z7-2;Q7Z6Z7-3	HUWE1_HUMAN	HUWE1	E3 ubiquitin-protein ligase HUWE1	20.4885	20.58	20.6652	19.3792	19.5583	19.861
+	1.81151	0.534216	Q7Z736	Q7Z736;X6R3U4	PKHH3_HUMAN	PLEKHH3	Pleckstrin homology domain-containing family H member 3	19.1549	19.0954	19.5103	18.7024	18.6883	18.7673
+	1.87938	0.553083	Q7Z7C8;Q7Z7C8-2	Q7Z7C8;A0A8I5QJI2;A0A8I5QL33;A0A8I5QL44;B4DZU5;Q7Z7C8-2;Q7Z7C8-4;A0A0A0MRR3;A0A8I5KTT0;A0A8I5KVM3;A0A8I5KXI2	TAF8_HUMAN	TAF8	Transcription initiation factor TFIID subunit 8	20.4818	20.571	20.8449	19.9423	20.1797	20.1165
+	1.76603	0.284112	Q7Z7F7;Q7Z7F7-2	Q7Z7F7;Q7Z7F7-2;X6R631	RM55_HUMAN	MRPL55	39S ribosomal protein L55, mitochondrial	18.6491	18.5037	18.7243	18.3361	18.2886	18.4
+	2.7081	0.35769	Q7Z7H8;Q7Z7H8-2	Q7Z7H8;Q7Z7H8-2	RM10_HUMAN	MRPL10	39S ribosomal protein L10, mitochondrial	18.9227	18.8909	19.0263	18.6193	18.6147	18.5329
+	2.17463	0.309603	Q7Z7K6	Q7Z7K6;Q7Z7K6-3;A0A0M3HER2	CENPV_HUMAN	CENPV	Centromere protein V	21.5208	21.5316	21.5617	21.1124	21.2708	21.3021
+	2.53256	0.876225	Q86SQ0	Q86SQ0;A0A1W2PQ63;G5E9V3;E9PFQ4;E9PDY7;Q86SQ0-2;Q86SQ0-3	PHLB2_HUMAN	PHLDB2	Pleckstrin homology-like domain family B member 2	19.4255	19.2778	19.3622	18.517	18.6798	18.2399
+	1.50062	0.516399	Q86SX3;Q86SX3-2;Q86SX3-6	Q86SX3;C9IYA4;C9J6B2;C9J317;C9K0G6;Q86SX3-2;Q86SX3-3;Q86SX3-5;Q86SX3-6	TEDC1_HUMAN	TEDC1	Tubulin epsilon and delta complex protein 1	19.9148	20.0482	20.2933	19.5421	19.386	19.7791
+	3.45487	0.56238	Q86TC9	Q86TC9;Q86TC9-2;A0A8I5QL13;A0A8J9ASZ5;A0A804CFL5;A0A8I5KWT3;A0A087WX60	MYPN_HUMAN	MYPN	Myopalladin	19.6841	19.6941	19.7689	19.1077	19.115	19.2373
+	2.19015	-1.51706	Q86TG7-2	Q86TG7-2;Q86TG7-3;Q86TG7-5;A0A087WZG9	PEG10_HUMAN	PEG10	Isoform of Q86TG7, Isoform 2 of Retrotransposon-derived protein PEG10	17.0715	17.698	17.9692	18.9606	18.9971	19.3322
+	1.14374	0.937455	Q86TJ2;Q86TJ2-2;Q86TJ2-3	Q86TJ2;Q86TJ2-2;Q86TJ2-3	TAD2B_HUMAN	TADA2B	Transcriptional adapter 2-beta	18.3406	18.5739	17.9653	17.8027	17.5814	16.6833
+	1.35307	0.328467	Q86U06;Q86U06-2;Q86U06-4;Q86U06-5	Q86U06;Q86U06-2;Q86U06-3;Q86U06-4;Q86U06-5;G3V546;G3XAP0	RBM23_HUMAN	RBM23	Probable RNA-binding protein 23	19.8531	20.077	19.9242	19.7243	19.4387	19.7058
+	1.61196	0.290625	Q86U38	Q86U38;H0YJP7;Q86U38-2;A0A3B3ISH6	NOP9_HUMAN	NOP9	Nucleolar protein 9	20.3846	20.4324	20.5756	20.2476	20.0562	20.2169
+	1.73166	0.255379	Q86UE4	Q86UE4;H0YB56;H0YBE0;E5RJU9	LYRIC_HUMAN	MTDH	Protein LYRIC	23.6006	23.4693	23.5645	23.3344	23.3518	23.1821
+	1.71751	1.41281	Q86UE8;Q86UE8-2	Q9UKI8;Q86UE8;J3KRK0;Q9UKI8-2;Q9UKI8-3;Q9UKI8-4;Q9UKI8-5;A0A804HIB4;Q86UE8-2;Q86UE8-3;A0A804HK10;A0A804HJX3;A0A804HJZ9;A0A804HKF1;J3QLK5	TLK2_HUMAN	TLK2	Serine/threonine-protein kinase tousled-like 2	18.2136	18.7346	17.5206	16.722	16.544	16.9644
+	6.24433	0.731396	Q86UK7;Q86UK7-3	Q86UK7;Q86UK7-2;Q86UK7-3;H3BPG6	ZN598_HUMAN	ZNF598	E3 ubiquitin-protein ligase ZNF598	20.9854	20.9769	21.0135	20.2496	20.2723	20.2597
+	1.745	-2.9157	Q86UL3	Q86UL3	GPAT4_HUMAN	GPAT4	Glycerol-3-phosphate acyltransferase 4	16.4749	15.4936	15.4533	20.047	18.2915	17.8304
+	3.3963	1.38431	Q86UN3	Q86UN3	R4RL2_HUMAN	RTN4RL2	Reticulon-4 receptor-like 2	20.6256	20.5821	20.7288	19.1423	19.4997	19.1415
+	2.57185	0.570075	Q86UP2	Q86UP2;Q86UP2-2;Q86UP2-3;Q86UP2-4;G3V4Y7	KTN1_HUMAN	KTN1	Kinectin	20.1569	20.1618	20.0336	19.5108	19.4396	19.6916
+	1.3906	0.910288	Q86UP3;Q86UP3-2;Q86UP3-4;Q86UP3-5	Q86UP3;Q86UP3-2;Q86UP3-4;Q86UP3-5;E7EVZ1	ZFHX4_HUMAN	ZFHX4	Zinc finger homeobox protein 4	24.0545	23.4818	23.2866	22.9739	22.8101	22.3081
+	1.39028	-0.381797	Q86UT8	Q86UT8	CATAC_HUMAN	CENATAC	Centrosomal AT-AC splicing factor	18.4547	18.4568	18.8213	18.9041	19.036	18.938
+	4.35431	1.07048	Q86V48	Q86V48;Q86V48-2;Q86V48-3	LUZP1_HUMAN	LUZP1	Leucine zipper protein 1	21.1111	21.1535	21.2016	19.9998	20.0835	20.1714
+	1.70284	0.470898	Q86V81	Q86V81;E9PB61	THOC4_HUMAN	ALYREF	THO complex subunit 4	22.9146	23.1172	23.283	22.6092	22.7588	22.5341
+	1.48427	0.366386	Q86V97	Q86V97;Q8WVZ9	KBTB6_HUMAN	KBTBD6	Kelch repeat and BTB domain-containing protein 6	18.734	18.6963	18.502	18.4028	18.3247	18.1056
+	2.25563	0.775967	Q86VI3	Q86VI3;F2Z2E2	IQGA3_HUMAN	IQGAP3	Ras GTPase-activating-like protein IQGAP3	20.1657	20.185	20.3777	19.2837	19.4094	19.7074
+	2.71169	1.29198	Q86VP6	Q86VP6;Q86VP6-2;A0A0C4DGH5	CAND1_HUMAN	CAND1	Cullin-associated NEDD8-dissociated protein 1	20.9399	21.1903	21.4572	19.8188	19.7931	20.0995
+	1.48254	1.09983	Q86VQ1	Q86VQ1	GLCI1_HUMAN	GLCCI1	Glucocorticoid-induced transcript 1 protein	17.6354	18.1903	18.7807	17.1772	17.214	16.9157
+	2.29331	0.886826	Q86W34	Q86W34;J3KRD0;J3KS38;J3KRS2;J3KSH1;J3KTM1;J3QLK6	AMZ2_HUMAN	AMZ2	Archaemetzincin-2	22.3895	22.3497	22.8054	21.5688	21.7561	21.5592
+	1.03597	-0.724822	Q86WA8	Q86WA8;H3BUW8;Q86WA8-2;E7EN44	LONP2_HUMAN	LONP2	Lon protease homolog 2, peroxisomal	15.6247	15.2295	15.8301	15.8536	16.202	16.8031
+	3.01589	0.799371	Q86WX3	Q86WX3	AROS_HUMAN	RPS19BP1	Active regulator of SIRT1	23.2409	23.2909	23.1442	22.3924	22.5804	22.305
+	1.02832	0.805222	Q86X10;Q86X10-3	Q86X10;Q86X10-2;Q86X10-3;A0A0J9YW54;A2A2F0	RLGPB_HUMAN	RALGAPB	Ral GTPase-activating protein subunit beta	17.1103	17.606	18.1842	16.8349	16.4834	17.1664
+	2.58804	1.14438	Q86X29;Q86X29-4;Q86X29-5;Q86X29-6	Q86X29;Q86X29-2;Q86X29-3;Q86X29-4;Q86X29-5;Q86X29-6;S4R3V8	LSR_HUMAN	LSR	Lipolysis-stimulated lipoprotein receptor	18.2998	18.784	18.6455	17.5458	17.2502	17.5001
+	2.68727	0.731227	Q86X55;Q86X55-1	Q86X55;Q86X55-1;Q86X55-2;K7EQA8	CARM1_HUMAN	CARM1	Histone-arginine methyltransferase CARM1	19.7721	19.9919	20.0012	19.0508	19.2739	19.2468
+	2.55645	1.16754	Q86X83;Q86X83-2	Q86X83;F8WBW1;F8WC41;Q86X83-2	COMD2_HUMAN	COMMD2	COMM domain-containing protein 2	17.745	17.7781	17.4204	16.6916	16.5235	16.2257
+	2.13157	0.517215	Q86X95	Q86X95;Q86X95-2	CIR1_HUMAN	CIR1	Corepressor interacting with RBPJ 1	20.6826	20.7072	20.8552	20.3283	20.3092	20.0558
+	2.35455	0.572765	Q86XI2	Q86XI2;H0Y6U5;Q86XI2-2	CNDG2_HUMAN	NCAPG2	Condensin-2 complex subunit G2	19.4631	19.635	19.7142	19.0229	18.9223	19.1488
+	4.99175	0.868402	Q86XP3	Q86XP3;Q86XP3-2	DDX42_HUMAN	DDX42	ATP-dependent RNA helicase DDX42	20.5679	20.6737	20.6388	19.7499	19.7624	19.7629
+	2.34101	0.844643	Q86XR8	Q86XR8;Q86XR8-2;Q86XR8-3;Q86XR8-4;Q86XR8-5;F5GYW0;F5H0C6;F5H1B0	CEP57_HUMAN	CEP57	Centrosomal protein of 57 kDa	18.5606	18.9548	18.9708	17.8635	18.0397	18.0492
+	2.92392	0.246715	Q86XZ4	Q86XZ4	SPAS2_HUMAN	SPATS2	Spermatogenesis-associated serine-rich protein 2	23.9793	23.9399	24.036	23.7467	23.7519	23.7164
+	2.93429	0.475012	Q86Y07	Q86Y07;E7ERS5;Q86Y07-2;Q86Y07-5;E9PBU1	VRK2_HUMAN	VRK2	Serine/threonine-protein kinase VRK2	19.2161	19.3749	19.3074	18.788	18.893	18.7924
+	1.58168	0.858903	Q86Y56	Q86Y56;Q86Y56-2;H0Y650	DAAF5_HUMAN	DNAAF5	Dynein axonemal assembly factor 5	18.8591	19.2143	19.4932	18.6141	18.0296	18.3462
+	1.03488	6.54289	Q86YN6;Q86YN6-2	Q86YN6;Q86YN6-2;Q86YN6-5;Q86YN6-6	PRGC2_HUMAN	PPARGC1B	Peroxisome proliferator-activated receptor gamma coactivator 1-beta	23.8169	23.7214	23.8906	15.0604	23.1438	13.596
+	2.80262	0.831282	Q86YT6	Q86YT6	MIB1_HUMAN	MIB1	E3 ubiquitin-protein ligase MIB1	19.0643	19.0586	19.0253	18.0601	18.1693	18.4249
+	0.857704	1.58613	Q86Z02;Q86Z02-2	Q86Z02;J3KP92;Q86Z02-2;Q5SQL3	HIPK1_HUMAN	HIPK1	Homeodomain-interacting protein kinase 1	18.2935	18.3157	18.6777	15.1433	17.7568	17.6284
+	5.82535	1.17084	Q8IUD2	Q8IUD2;G8JLD3;A0A8J9C065;X6RM00;X6RLX0;K7EKH8;K7EPP6;Q8IUD2-2;Q8IUD2-3;Q8IUD2-4	RB6I2_HUMAN	ERC1	ELKS/Rab6-interacting/CAST family member 1	20.6869	20.6224	20.6551	19.4516	19.4851	19.5153
+	2.16096	1.17362	Q8IUG5;Q8IUG5-3	Q8IUG5;Q8IUG5-2;Q8IUG5-3	MY18B_HUMAN	MYO18B	Unconventional myosin-XVIIIb	19.4056	18.9455	19.3968	17.8611	18.4155	17.9505
+	2.54476	1.1829	Q8IV35;Q8IV35-2	Q8IV35;H0Y8A5;A0A804HJG6;Q8IV35-2;A0A3B3IS43	WDR49_HUMAN	WDR49	WD repeat-containing protein 49	16.1076	15.7326	15.6662	14.5163	14.8883	14.5531
+	4.00378	1.3945	Q8IV63	Q8IV63;M0R025;M0QXD7;M0QZ79;M0QYA8;M0QYG0;Q8IV63-2	VRK3_HUMAN	VRK3	Inactive serine/threonine-protein kinase VRK3	20.5122	20.4347	20.566	19.0204	19.0374	19.2715
+	1.34042	1.65858	Q8IVC4	Q8IVC4;M0R0A3	ZN584_HUMAN	ZNF584	Zinc finger protein 584	16.9599	16.8023	17.0554	14.9139	16.4062	14.5218
+	3.7123	1.15667	Q8IVF2;Q8IVF2-3	Q8IVF2;Q8IVF2-3	AHNK2_HUMAN	AHNAK2	Protein AHNAK2	21.4353	21.3894	21.637	20.3008	20.418	20.2731
+	2.44281	0.503359	Q8IVF7	Q8IVF7;Q8IVF7-2;Q8IVF7-3;F8W1F5	FMNL3_HUMAN	FMNL3	Formin-like protein 3	19.2599	19.258	19.4759	18.7676	18.8148	18.9014
+	2.83673	0.54406	Q8IVL1-2;Q8IVL1-3;Q8IVL1-4	Q8IVL1;Q8IVL1-10;Q8IVL1-11;Q8IVL1-12;Q8IVL1-13;Q8IVL1-3;Q8IVL1-2;Q8IVL1-4;Q8IVL1-5;Q8IVL1-6;Q8IVL1-7;Q8IVL1-8;Q8IVL1-9	NAV2_HUMAN	NAV2	Isoform of Q8IVL1, Isoform 2 of Neuron navigator 2	19.8268	19.7314	19.7257	19.2471	19.3057	19.0988
+	2.42043	2.52782	Q8IVM0-2	Q8IVM0;Q8IVM0-2	CCD50_HUMAN	CCDC50	Isoform of Q8IVM0, Isoform 2 of Coiled-coil domain-containing protein 50	17.8539	18.0458	18.2524	15.0777	16.3267	15.1643
+	4.93651	1.2534	Q8IVT2	Q8IVT2	MISP_HUMAN	MISP	Mitotic interactor and substrate of PLK1	22.5017	22.4627	22.441	21.1434	21.2931	21.2087
+	1.95347	1.44839	Q8IVT5	Q8IVT5;A8MY87;Q8IVT5-2;Q8IVT5-3;Q8IVT5-4;A0A2R8Y5H9;A0A2R8Y4X0;A0A0A0MQW1	KSR1_HUMAN	KSR1	Kinase suppressor of Ras 1	17.5718	17.6638	17.5082	16.0631	16.721	15.6144
+	1.53443	0.606202	Q8IWA0	Q8IWA0;F8WE20;F8WC81	WDR75_HUMAN	WDR75	WD repeat-containing protein 75	20.8302	20.4103	20.8905	19.9027	20.1765	20.2332
+	3.33404	0.635063	Q8IWC1	Q8IWC1;A0A0A0MRP0;Q8IWC1-2;Q8IWC1-3;Q8IWC1-4	MA7D3_HUMAN	MAP7D3	MAP7 domain-containing protein 3	22.7639	22.8586	22.7143	22.1079	22.2297	22.094
+	3.85608	1.37803	Q8IWE4	Q8IWE4	DCNL3_HUMAN	DCUN1D3	DCN1-like protein 3	18.8594	18.9387	19.13	17.4928	17.6666	17.6346
+	4.44751	0.852377	Q8IWR0	Q8IWR0;Q8IWR0-2	Z3H7A_HUMAN	ZC3H7A	Zinc finger CCCH domain-containing protein 7A	22.2803	22.2471	22.335	21.4756	21.3684	21.4613
+	2.44852	-1.74248	Q8IWT3	Q8IWT3;Q8IWT3-3;E9PEZ1	CUL9_HUMAN	CUL9	Cullin-9	15.502	16.4393	15.8977	17.7824	17.5263	17.7577
+	1.68379	1.18407	Q8IWT6	Q8IWT6	LRC8A_HUMAN	LRRC8A	Volume-regulated anion channel subunit LRRC8A	16.6256	16.5093	17.5154	15.7401	15.7225	15.6354
+	1.5211	1.77988	Q8IWU2	Q8IWU2	LMTK2_HUMAN	LMTK2	Serine/threonine-protein kinase LMTK2	16.6964	16.4607	16.916	14.552	14.2377	15.9438
+	1.4986	0.60473	Q8IWV8;Q8IWV8-4	Q8IWV8;Q8IWV8-2;Q8IWV8-4	UBR2_HUMAN	UBR2	E3 ubiquitin-protein ligase UBR2	18.3656	17.8497	18.0168	17.5812	17.5811	17.2556
+	1.90205	2.78589	Q8IWW6-3	Q8IWW6;Q8IWW6-2;Q8IWW6-3;Q8IWW6-4;H0Y5D8;Q1RLN5	RHG12_HUMAN	ARHGAP12	Isoform of Q8IWW6, Isoform 3 of Rho GTPase-activating protein 12	18.425	19.5568	18.9185	15.6808	17.2929	15.569
+	3.48621	0.552921	Q8IWX8	Q8IWX8;J3QK89	CHERP_HUMAN	CHERP	Calcium homeostasis endoplasmic reticulum protein	22.8122	22.9004	22.7978	22.2173	22.2941	22.3401
+	1.14371	0.708585	Q8IWZ3-3	H3BLS9;Q8IWZ3-2;Q8IWZ3-3;E9PDP5	ANKH1_HUMAN	ANKHD1	Isoform of Q8IWZ3, Isoform 3 of Ankyrin repeat and KH domain-containing protein 1	20.5696	20.4116	20.7174	20.1163	20.1538	19.3027
+	3.89973	0.501288	Q8IWZ3-6	Q8IWZ3;H0Y7Y3;H0Y785;H0Y4P6;H0Y472;A0A0A0MQZ8;Q8IWZ3-4;Q8IWZ3-6	ANKH1_HUMAN	ANKHD1	Isoform of Q8IWZ3, Isoform 6 of Ankyrin repeat and KH domain-containing protein 1	22.5273	22.5632	22.6262	22.0787	22.0981	22.0362
+	2.16195	0.515361	Q8IWZ8	Q8IWZ8;B4DVK3;Q8IWZ8-2;K7ELR6;K7ESM0	SUGP1_HUMAN	SUGP1	SURP and G-patch domain-containing protein 1	20.2609	20.2875	20.4461	19.9349	19.8557	19.6578
+	3.00172	0.516589	Q8IX12;Q8IX12-2	Q8IX12;F5H3E1;F5H2E6;A0A0C4DGG8;F5H1H2;Q8IX12-2	CCAR1_HUMAN	CCAR1	Cell division cycle and apoptosis regulator protein 1	21.3964	21.3999	21.3159	20.9477	20.8516	20.7632
+	2.11643	1.01877	Q8IX18;Q8IX18-3	Q8IX18;Q8IX18-2;Q8IX18-3;Q8IX18-4;F5H625	DHX40_HUMAN	DHX40	Probable ATP-dependent RNA helicase DHX40	18.9514	18.6369	18.9384	17.5773	17.7254	18.1677
+	1.1786	0.774641	Q8IXB1	Q8IXB1;Q8IXB1-2;Q8IXB1-3;A0A7P0T9B7;A0A7P0TB83;A0A7P0TB97;A0A7P0TAQ9;A0A7P0TB22;A0A7P0Z431;A0A7P0Z4F2;A0A494C1G5;E7EP04	DJC10_HUMAN	DNAJC10	DnaJ homolog subfamily C member 10	16.0483	16.9795	16.4238	15.8446	15.8723	15.4107
+	1.40727	2.5929	Q8IXH7;Q8IXH7-4	Q8IXH7;X6RLT1;Q8IXH7-4;H0UI80	NELFD_HUMAN	NELFCD	Negative elongation factor C/D	18.6705	18.2795	18.8136	15.1668	15.1362	17.6819
+	2.95754	2.20345	Q8IXI1	Q8IXI1;H3BST5;A0A8V8TM48;I3L2C6	MIRO2_HUMAN	RHOT2	Mitochondrial Rho GTPase 2	20.4111	20.4601	21.0338	18.1556	18.742	18.397
+	1.32041	-0.521437	Q8IXJ9	Q8IXJ9;A0A2R8Y5U1;Q76L82	ASXL1_HUMAN	ASXL1	Polycomb group protein ASXL1	17.1213	17.0153	16.835	17.2681	17.4416	17.8263
+	2.10638	0.534835	Q8IXK0;Q8IXK0-4;Q8IXK0-5	Q8IXK0;Q8IXK0-2;Q8IXK0-3;Q8IXK0-4;Q8IXK0-5;A0A0A0MSI2	PHC2_HUMAN	PHC2	Polyhomeotic-like protein 2	18.5104	18.7766	18.584	18.0618	18.2278	17.9768
+	0.895156	-1.12697	Q8IXQ3	Q8IXQ3	CI040_HUMAN	C9orf40	Uncharacterized protein C9orf40	15.8313	17.2254	17.7293	18.2608	18.1418	17.7644
+	1.92622	2.63491	Q8IXQ4	Q8IXQ4;A0A0A0MRI1;Q8IXQ4-2;Q8IXQ4-3	GPAM1_HUMAN	GPALPP1	GPALPP motifs-containing protein 1	18.7281	18.4273	18.926	16.7282	14.8963	16.5521
+	3.32195	-1.22025	Q8IXS8	Q8IXS8;A0A804HIT6	HYCC2_HUMAN	HYCC2	Hyccin 2	17.9277	18.118	18.0301	19.0531	19.2771	19.4064
+	2.46936	-0.984097	Q8IXW5	Q8IXW5;Q8IXW5-2	RPAP2_HUMAN	RPAP2	Putative RNA polymerase II subunit B1 CTD phosphatase RPAP2	19.1349	19.138	18.6683	19.978	20.0002	19.9153
+	2.57305	0.309292	Q8IXX5	Q8IXX5;Q8IXX5-2	T183A_HUMAN	TMEM183A	Transmembrane protein 183A	20.7123	20.7316	20.7698	20.3984	20.3732	20.5142
+	1.74991	0.458163	Q8IXZ2	Q8IXZ2	ZC3H3_HUMAN	ZC3H3	Zinc finger CCCH domain-containing protein 3	18.7752	18.7984	18.8297	18.1094	18.4699	18.4495
+	2.34491	0.411403	Q8IY17;Q8IY17-3	Q6ZV29;Q8IY17;A0A384DVU0;Q8IY17-2;Q8IY17-3;Q8IY17-5;Q6ZV29-3;Q6ZV29-4;Q6ZV29-5	PLPL6_HUMAN	PNPLA6	Patatin-like phospholipase domain-containing protein 6	19.8551	20.0354	19.9755	19.5599	19.454	19.6178
+	2.11077	0.35852	Q8IY18	Q8IY18	SMC5_HUMAN	SMC5	Structural maintenance of chromosomes protein 5	19.4586	19.3289	19.566	19.1167	19.0461	19.1151
+	3.46074	1.05489	Q8IY67-2	Q8IY67;E9PAU2;Q8IY67-2;A0A087WZ13	RAVR1_HUMAN	RAVER1	Isoform of Q8IY67, Isoform 2 of Ribonucleoprotein PTB-binding 1	19.9196	20.0714	19.7753	18.9383	18.8145	18.8488
+	2.60445	-0.253921	Q8IY81	Q8IY81	SPB1_HUMAN	FTSJ3	pre-rRNA 2'-O-ribose RNA methyltransferase FTSJ3	22.6726	22.6959	22.6113	22.9347	22.9479	22.8588
+	4.65814	0.666356	Q8IYA6	Q8IYA6;Q8IYA6-2;Q8IYA6-3	CKP2L_HUMAN	CKAP2L	Cytoskeleton-associated protein 2-like	22.3646	22.3217	22.4204	21.6959	21.7149	21.6969
+	1.27286	0.742719	Q8IYB5;Q8IYB5-2;Q8IYB5-3	Q8IYB5;Q8IYB5-3;Q8IYB5-2;A0A087X1X9	SMAP1_HUMAN	SMAP1	Stromal membrane-associated protein 1	17.5309	18.0667	18.4331	17.4091	17.259	17.1344
+	2.02575	3.393	Q8IYI6	Q8IYI6	EXOC8_HUMAN	EXOC8	Exocyst complex component 8	20.4315	20.2173	19.755	16.4775	15.6893	18.0581
+	5.79623	-5.35379	Q8IYS0	Q8IYS0;C9J7B8;Q8IYS0-2;E9PHT3	ASTRC_HUMAN	GRAMD1C	Protein Aster-C	15.806	15.7646	15.8124	21.1775	20.9257	21.3412
+	1.74974	1.73045	Q8IZ21;Q8IZ21-2;Q8IZ21-3	Q8IZ21;Q8IZ21-2;Q8IZ21-3	PHAR4_HUMAN	PHACTR4	Phosphatase and actin regulator 4	16.4778	16.4644	15.6729	13.7617	14.784	14.8781
+	4.48684	0.494029	Q8IZH2;Q8IZH2-2	Q8IZH2;H7C5E4;Q8IZH2-2	XRN1_HUMAN	XRN1	5'-3' exoribonuclease 1	20.8375	20.8116	20.8544	20.3723	20.3469	20.3023
+	2.85062	1.15192	Q8IZP0;Q8IZP0-2;Q8IZP0-3;Q8IZP0-4;Q8IZP0-5;Q8IZP0-6;Q8IZP0-9	Q9NYB9;Q8IZP0;E7EW77;E7EP65;B6VEX4;F8WAL6;H0Y6B5;A0A7D9NKC8;A0A0A0MRT6;Q9NYB9-2;Q9NYB9-3;Q9NYB9-4;E9PEZ7;Q8IZP0-10;Q8IZP0-11;Q8IZP0-12;Q8IZP0-2;Q8IZP0-3;Q8IZP0-4;Q8IZP0-5;Q8IZP0-6;Q8IZP0-7;Q8IZP0-8;Q8IZP0-9;A0A0C4DG21	ABI1_HUMAN	ABI1	Abl interactor 1	20.1261	20.2572	19.7947	18.9519	18.8076	18.9628
+	1.6546	0.477115	Q8N0V3	Q8N0V3;Q8N0V3-2	RBFA_HUMAN	RBFA	Putative ribosome-binding factor A, mitochondrial	20.7247	20.9055	20.6284	20.437	20.0832	20.3071
+	2.80852	0.803766	Q8N0X7	Q8N0X7	SPART_HUMAN	SPART	Spartin	18.0529	17.802	17.8209	17.222	17.0201	17.0223
+	1.08888	1.95813	Q8N0Y2;Q8N0Y2-2	Q8N0Y2;Q8N0Y2-2	ZN444_HUMAN	ZNF444	Zinc finger protein 444	18.7573	18.8467	18.7056	15.212	17.1427	18.0806
+	3.18738	0.337458	Q8N0Z3	Q8N0Z3	SPICE_HUMAN	SPICE1	Spindle and centriole-associated protein 1	19.3139	19.3108	19.3551	18.9835	19.0472	18.9368
+	1.33186	-0.414844	Q8N0Z6	Q8N0Z6	TTC5_HUMAN	TTC5	Tetratricopeptide repeat protein 5	17.7798	17.4504	17.8343	17.9474	18.1315	18.2301
+	3.86199	2.04201	Q8N108;Q8N108-12;Q8N108-13;Q8N108-14;Q8N108-15;Q8N108-16;Q8N108-17;Q8N108-18	Q8N108;Q8N108-12;Q8N108-13;Q8N108-14;Q8N108-15;Q8N108-16;Q8N108-17;Q8N108-18;Q8N108-19	MIER1_HUMAN	MIER1	Mesoderm induction early response protein 1	20.3008	20.6995	20.693	18.613	18.5275	18.4267
+	1.25008	1.67403	Q8N163;Q8N163-2	Q8N163;H0YB24;G3V119;Q8N163-2	CCAR2_HUMAN	CCAR2	Cell cycle and apoptosis regulator protein 2	18.8208	19.4923	18.0211	16.3411	17.0308	17.9401
+	3.82372	1.01821	Q8N1F7	Q8N1F7;H3BVE2;H3BVG0;Q8N1F7-2	NUP93_HUMAN	NUP93	Nuclear pore complex protein Nup93	20.5759	20.7005	20.811	19.682	19.7198	19.6311
+	0.7652	2.44932	Q8N1G2	Q8N1G2	CMTR1_HUMAN	CMTR1	Cap-specific mRNA (nucleoside-2'-O-)-methyltransferase 1	19.7366	19.5478	19.4754	18.7166	18.4974	14.1979
+	2.12051	0.640083	Q8N1G4	Q8N1G4	LRC47_HUMAN	LRRC47	Leucine-rich repeat-containing protein 47	21.8765	21.6228	21.5228	20.9663	20.9547	21.181
+	1.31043	-0.390575	Q8N2K0;Q8N2K0-2	Q8N2K0;A0A5F9ZGT4;A0A5F9ZH49;A0A5F9ZH71;A0A5F9ZHQ0;A0A5F9ZHQ8;A0A5F9ZHH2;Q8N2K0-2;Q8N2K0-3;I3L206	ABD12_HUMAN	ABHD12	Lysophosphatidylserine lipase ABHD12	17.7982	17.8117	17.7057	18.1585	17.9297	18.3993
+	3.76348	-0.521008	Q8N3C0	Q8N3C0	ASCC3_HUMAN	ASCC3	Activating signal cointegrator 1 complex subunit 3	23.7863	23.8483	23.8312	24.4037	24.287	24.3382
+	3.25949	0.689813	Q8N3E9	Q8N3E9	PLCD3_HUMAN	PLCD3	1-phosphatidylinositol 4,5-bisphosphate phosphodiesterase delta-3	21.1263	21.099	21.1672	20.3156	20.5377	20.4697
+	1.46873	0.740719	Q8N3R9	Q8N3R9;Q8N3R9-2	PALS1_HUMAN	PALS1	Protein PALS1	18.6716	18.4661	18.6515	18.062	17.4069	18.0982
+	2.87408	1.06927	Q8N3U4;Q8N3U4-2	Q8N3U4;Q8N3U4-2;A0A8I5KVF8	STAG2_HUMAN	STAG2	Cohesin subunit SA-2	20.181	19.9329	19.7177	18.8796	18.8817	18.8625
+	1.89005	2.67601	Q8N3Z6	Q8N3Z6	ZCHC7_HUMAN	ZCCHC7	Zinc finger CCHC domain-containing protein 7	18.2832	17.3974	17.5587	15.6397	15.6277	13.9438
+	1.37336	0.561799	Q8N490-2	Q8N490-2	PNKD_HUMAN	PNKD	Isoform of Q8N490, Isoform 2 of Probable hydrolase PNKD	17.142	16.6	16.955	16.1258	16.4549	16.4309
+	2.53788	0.768935	Q8N4C8	Q8N4C8;O95819;Q9UKE5;E7EX83;Q8N4C8-2;Q8N4C8-3;Q8N4C8-4;Q8N4C8-5;A0A0D9SEY1;O95819-2;O95819-3;O95819-4;O95819-5;O95819-6;H7C360;H7C0P6;G5E948;Q9UKE5-2;Q9UKE5-3;Q9UKE5-4;Q9UKE5-5;Q9UKE5-6;Q9UKE5-7;Q9UKE5-8;E7EN19;E7ENQ1	MINK1_HUMAN	MINK1	Misshapen-like kinase 1	20.7106	20.7981	20.4779	19.9179	20.0001	19.7617
+	2.52859	0.283637	Q8N4T4	Q8N4T4;Q8N4T4-3;Q8N4T4-4	ARG39_HUMAN	ARHGEF39	Rho guanine nucleotide exchange factor 39	19.5801	19.6854	19.6923	19.3291	19.4143	19.3635
+	3.23336	0.236094	Q8N531	Q8N531;Q8N531-2	FBXL6_HUMAN	FBXL6	F-box/LRR-repeat protein 6	21.5333	21.5069	21.4557	21.2543	21.2569	21.2764
+	3.17347	1.12011	Q8N556;Q8N556-2	Q8N556;Q8N556-2	AFAP1_HUMAN	AFAP1	Actin filament-associated protein 1	21.2472	21.2291	21.309	20.2539	19.9122	20.2589
+	1.76079	0.500347	Q8N567	Q8N567	ZCHC9_HUMAN	ZCCHC9	Zinc finger CCHC domain-containing protein 9	18.8619	19.0916	18.7155	18.3946	18.2724	18.501
+	2.19085	0.26956	Q8N5C6	Q8N5C6;Q8N5C6-2	SRBD1_HUMAN	SRBD1	S1 RNA-binding domain-containing protein 1	21.3278	21.2541	21.303	20.9687	20.989	21.1185
+	1.19277	1.19687	Q8N5C7	Q8N5C7;H0YMP4;H0YML0;H0YL61;H0YK73;Q8N5C7-3	DTWD1_HUMAN	DTWD1	tRNA-uridine aminocarboxypropyltransferase 1	17.7938	17.1234	17.1165	16.7525	16.337	15.3536
+	0.826898	-2.18654	Q8N5D0;Q8N5D0-4	Q8N5D0;Q8N5D0-4;H0YEI6	WDTC1_HUMAN	WDTC1	WD and tetratricopeptide repeats protein 1	19.8312	16.0505	16.4426	19.4005	19.3603	20.1231
+	3.03302	0.472648	Q8N5G2	Q8N5G2;Q8N5G2-2;Q8N5G2-3	MACOI_HUMAN	MACO1	Macoilin	18.6283	18.606	18.4863	18.0558	18.0869	18.1599
+	0.914753	2.58033	Q8N5I9	Q8N5I9;J3KN91;A0A087WT30	NOPC1_HUMAN	NOPCHAP1	NOP protein chaperone 1	19.6438	19.6135	20.3717	15.3521	19.7465	16.7894
+	2.32396	0.853226	Q8N5L8	Q8N5L8	RP25L_HUMAN	RPP25L	Ribonuclease P protein subunit p25-like protein	22.2028	21.8756	22.2914	21.4285	21.221	21.1606
+	2.03277	0.736092	Q8N5P1	Q8N5P1	ZC3H8_HUMAN	ZC3H8	Zinc finger CCCH domain-containing protein 8	21.3453	21.1684	21.4229	20.3072	20.664	20.7572
+	4.39469	1.14053	Q8N684;Q8N684-2;Q8N684-3	Q8N684;Q8N684-2;Q8N684-3;F5H669	CPSF7_HUMAN	CPSF7	Cleavage and polyadenylation specificity factor subunit 7	23.1662	23.1522	23.0038	22.0065	21.9167	21.9774
+	1.94166	0.887714	Q8N6C5;Q8N6C5-2;Q8N6C5-4	Q8N6C5;Q8N6C5-2;Q8N6C5-4;A0A494C0W8;A0A494C0K8	IGSF1_HUMAN	IGSF1	Immunoglobulin superfamily member 1	22.2748	21.9754	22.1006	21.5164	21.2758	20.8956
+	2.67091	0.734329	Q8N6H7	Q8N6H7;Q8N6H7-2;A0A0D9SF70;E9PQP3;G5E9L0;E9PN48;E9PIY6	ARFG2_HUMAN	ARFGAP2	ADP-ribosylation factor GTPase-activating protein 2	18.6193	18.8166	18.7221	18.1513	17.8563	17.9474
+	1.37145	2.1362	Q8N6M0	Q8N6M0;A0A0C4DH76;A0A087X0W9	OTU6B_HUMAN	OTUD6B	Deubiquitinase OTUD6B	17.4021	17.6117	17.2851	16.7315	14.7057	14.4532
+	2.60695	0.551369	Q8N6R0	Q8N6R0;Q8N6R0-1;Q8N6R0-2;Q8N6R0-3	EFNMT_HUMAN	METTL13	eEF1A lysine and N-terminal methyltransferase	19.6406	19.5759	19.6915	18.9554	19.0863	19.2122
+	1.81726	1.41742	Q8N6T3-2;Q8N6T3-5	Q8N6T3;F8VWH9;F8W1U7;Q8N6T3-2;Q8N6T3-3;Q8N6T3-4;Q8N6T3-5;E5RHC5;E5RHT6	ARFG1_HUMAN	ARFGAP1	Isoform of Q8N6T3, Isoform 2 of ADP-ribosylation factor GTPase-activating protein 1	16.8511	16.5878	16.9998	15.7721	14.7445	15.6699
+	6.81733	-3.77101	Q8N7H5;Q8N7H5-3	Q8N7H5;Q8N7H5-2;Q8N7H5-3;B4DGJ5	PAF1_HUMAN	PAF1	RNA polymerase II-associated factor 1 homolog	21.8722	21.832	21.8311	25.6149	25.6958	25.5377
+	2.46481	0.824409	Q8N7R7	Q8N7R7;Q8N7R7-2;Q8N7R7-3	CCYL1_HUMAN	CCNYL1	Cyclin-Y-like protein 1	19.6091	19.9525	19.9591	18.9245	19.1428	18.9801
+	5.93032	0.70488	Q8N884	Q8N884;A0A7P0TBQ3;Q8N884-2	CGAS_HUMAN	CGAS	Cyclic GMP-AMP synthase	25.0291	25.0299	25.0555	24.347	24.3436	24.3093
+	2.74688	0.617043	Q8N8A6	Q8N8A6	DDX51_HUMAN	DDX51	ATP-dependent RNA helicase DDX51	20.1601	20.1567	20.2307	19.6261	19.407	19.6633
+	2.27191	1.61729	Q8N8S7	Q8N8S7;A0A075B6E5;A0A0U1RQP7;A0A0U1RRM6;Q8N8S7-2;Q8N8S7-3	ENAH_HUMAN	ENAH	Protein enabled homolog	18.7672	18.659	18.8376	17.0468	17.6782	16.6869
+	2.85734	0.867528	Q8N954	Q8N954;A0A6I8PRS5	GPT11_HUMAN	GPATCH11	G patch domain-containing protein 11	20.4051	20.3157	20.5784	19.413	19.6716	19.6121
+	2.0045	0.418371	Q8N983;Q8N983-2;Q8N983-3;Q8N983-4;Q8N983-6;Q8N983-7	Q8N983;H0YBU8;H0Y6Y8;Q8N983-2;Q8N983-3;Q8N983-4;Q8N983-6;Q8N983-7;B1AL05	RM43_HUMAN	MRPL43	39S ribosomal protein L43, mitochondrial	18.3115	18.1662	18.1763	17.6703	17.9385	17.7901
+	3.88759	-0.679656	Q8N9N2-2	Q8N9N2;H0YER2;H0YE76;H0YCB3;A0A5F9ZH79;A0A5F9ZHP1;Q8N9N2-2	ASCC1_HUMAN	ASCC1	Isoform of Q8N9N2, Isoform 2 of Activating signal cointegrator 1 complex subunit 1	22.1619	22.092	22.1551	22.8472	22.8662	22.7346
+	2.10652	-1.7499	Q8N9N8	Q8N9N8;E9PS30;E9PS76;E9PQD0;E9PLI6	EIF1A_HUMAN	EIF1AD	Probable RNA-binding protein EIF1AD	15.9914	16.4987	15.4105	17.7046	18.0058	17.4399
+	2.72563	0.493248	Q8N9T8	Q8N9T8;F8WFC1;H0YH26;H0YFD2;A0A494C108	KRI1_HUMAN	KRI1	Protein KRI1 homolog	20.8692	20.9464	21.0525	20.4394	20.5442	20.4049
+	1.96795	0.896217	Q8N9V7	Q8N9V7	TOPZ1_HUMAN	TOPAZ1	Protein TOPAZ1	17.9493	17.859	18.334	17.1378	16.9237	17.3922
+	1.04372	0.623864	Q8N9Z2	Q8N9Z2;Q8N9Z2-2	CC71L_HUMAN	CCDC71L	Coiled-coil domain-containing protein 71L	18.2552	18.3796	18.8094	17.6665	17.6001	18.306
+	3.12397	1.44339	Q8NAT2;Q8NAT2-1	Q8NAT2;Q8NAT2-1	TDRD5_HUMAN	TDRD5	Tudor domain-containing protein 5	18.1087	17.9112	17.8211	16.3636	16.7642	16.3831
+	2.18566	0.57405	Q8NAV2	Q8NAV2	CH058_HUMAN	C8orf58	Uncharacterized protein C8orf58	23.0526	23.1309	23.3039	22.4469	22.73	22.5884
+	2.31153	1.44615	Q8NB50;Q8NB50-3	Q8NB50;Q8NB50-2;Q8NB50-3	ZFP62_HUMAN	ZFP62	Zinc finger protein 62 homolog	16.8049	16.5766	16.9065	15.5998	14.8449	15.5047
+	1.86804	0.555881	Q8NBI5;Q8NBI5-2	Q8NBI5;Q8NBI5-2;E9PS74	S43A3_HUMAN	SLC43A3	Equilibrative nucleobase transporter 1	19.8902	20.0511	20.2662	19.484	19.4015	19.6544
+	1.90562	2.96177	Q8NBJ5	Q8NBJ5;A0A8I5QL08;A0A8I5QKL8;M0QX72	GT251_HUMAN	COLGALT1	Procollagen galactosyltransferase 1	17.5045	17.8091	18.1551	15.2666	13.5724	15.7445
+	1.8183	0.737137	Q8NBM4	Q8NBM4;Q8NBM4-2;Q8NBM4-3	UBAC2_HUMAN	UBAC2	Ubiquitin-associated domain-containing protein 2	17.5402	17.0045	17.5338	16.6126	16.5664	16.688
+	1.97452	0.485204	Q8NBQ5	Q8NBQ5;D6RCD0	DHB11_HUMAN	HSD17B11	Estradiol 17-beta-dehydrogenase 11	19.0402	19.2498	19.0094	18.6018	18.7523	18.4897
+	1.61291	2.52073	Q8NBS9	Q8NBS9	TXND5_HUMAN	TXNDC5	Thioredoxin domain-containing protein 5	18.514	18.5236	18.1269	15.6307	17.1869	14.7847
+	1.7269	0.809499	Q8NBT2	Q8NBT2;K7EJH0;A0A0A0MSN0;K7EJV2;K7EMX1;K7ERQ7;K7ESQ2;Q8NBT2-2	SPC24_HUMAN	SPC24	Kinetochore protein Spc24	17.8749	17.7234	18.2873	17.0214	17.4091	17.0266
+	1.74119	0.449682	Q8NBZ0	Q8NBZ0;I3NI13;I3L270;I3L0W8	IN80E_HUMAN	INO80E	INO80 complex subunit E	19.7403	19.6784	19.8303	19.4101	19.4055	19.0843
+	5.08999	0.652337	Q8NCA5	Q8NCA5;A0A8I5QKV5;E9PH82;A0A8I5KR56;A0A8I5KZA5	FA98A_HUMAN	FAM98A	Protein FAM98A	22.8739	22.8853	22.8689	22.2231	22.1863	22.2617
+	3.37597	0.625876	Q8NCD3	Q8NCD3;C9JWC4;Q8NCD3-2;Q8NCD3-3	HJURP_HUMAN	HJURP	Holliday junction recognition protein	20.1297	20.2717	20.2394	19.5103	19.6168	19.636
+	1.69146	3.00829	Q8NCF5	Q8NCF5	NF2IP_HUMAN	NFATC2IP	NFATC2-interacting protein	18.8272	18.6423	19.1173	17.3559	14.6499	15.5561
+	2.35374	3.27652	Q8NCW5;Q8NCW5-2	Q8NCW5;Q8NCW5-2;A0A7P0TAG8	NNRE_HUMAN	NAXE	NAD(P)H-hydrate epimerase	17.1929	17.3673	17.2263	13.9419	14.983	13.0321
+	2.69141	1.28107	Q8ND04;Q8ND04-2	Q8ND04;J3KTD7;Q8ND04-2;Q8ND04-3	SMG8_HUMAN	SMG8	Nonsense-mediated mRNA decay factor SMG8	18.1673	17.8745	17.9872	16.419	16.8296	16.9372
+	3.48659	0.641617	Q8ND24	Q8ND24	RN214_HUMAN	RNF214	RING finger protein 214	20.7471	20.7571	20.8075	20.0378	20.2199	20.1292
+	3.45395	1.22604	Q8ND76	Q8ND76;Q8ND76-2;Q8ND76-3	CCNY_HUMAN	CCNY	Cyclin-Y	23.4956	23.5171	23.5519	22.2679	22.4938	22.1248
+	1.26759	1.00878	Q8NDD1;Q8NDD1-5	Q8NDD1;Q5TBI2;Q8NDD1-5;Q8NDD1-6	CA131_HUMAN	C1orf131	Uncharacterized protein C1orf131	19.6899	18.6613	18.677	17.6949	18.1251	18.1818
+	4.29417	0.601505	Q8NDV7-6	Q8NDV7;H3BRT3;Q8NDV7-2;Q8NDV7-5;Q8NDV7-6;H7C269	TNR6A_HUMAN	TNRC6A	Isoform of Q8NDV7, Isoform 6 of Trinucleotide repeat-containing gene 6A protein	21.811	21.8803	21.8006	21.2273	21.2662	21.1939
+	1.23899	-0.836953	Q8NDW8;Q8NDW8-3;Q8NDW8-5;Q8NDW8-6;Q8NDW8-7	Q8NDW8;Q8NDW8-3;Q8NDW8-5;Q8NDW8-6;Q8NDW8-7;A0A804HK20;A0A0B4J1Y2	TT21A_HUMAN	TTC21A	Tetratricopeptide repeat protein 21A	23.7656	23.5342	22.8452	24.4233	23.9132	24.3193
+	1.75297	0.803574	Q8NDX5;Q8NDX5-2;Q8NDX5-7	Q8NDX5;E7EX82;Q8NDX5-2;Q8NDX5-7	PHC3_HUMAN	PHC3	Polyhomeotic-like protein 3	19.5652	19.8609	19.7504	18.6444	19.2793	18.8421
+	1.64432	0.698325	Q8NDX6	Q8NDX6	ZN740_HUMAN	ZNF740	Zinc finger protein 740	19.4579	19.5532	20.027	18.8433	18.9756	19.1242
+	1.77507	0.387119	Q8NE71	Q8NE71;H0YGW7;Q8NE71-2;Q5STZ8	ABCF1_HUMAN	ABCF1	ATP-binding cassette sub-family F member 1	23.5557	23.4994	23.2629	23.085	23.0977	22.9739
+	2.24028	0.380619	Q8NEF9	Q8NEF9	SRFB1_HUMAN	SRFBP1	Serum response factor-binding protein 1	20.4685	20.5635	20.3719	20.1322	20.1306	19.9993
+	1.774	0.730982	Q8NEM2	Q8NEM2	SHCBP_HUMAN	SHCBP1	SHC SH2 domain-binding protein 1	19.9131	20.3076	20.0954	19.3305	19.1467	19.646
+	3.40803	0.78275	Q8NEY1-2	Q8NEY1;H0Y6F6;A0A0A0MRJ3;Q8NEY1-2;Q8NEY1-3;Q8NEY1-4;Q8NEY1-5;Q8NEY1-6;Q8NEY1-7;A0A8I5KSE4	NAV1_HUMAN	NAV1	Isoform of Q8NEY1, Isoform 2 of Neuron navigator 1	21.2256	21.2006	21.0677	20.427	20.4401	20.2786
+	2.39993	0.490511	Q8NEY8-2;Q8NEY8-8	Q8NEY8;F8VWU8;F8VRK2;F8W0Q9;F8VPY7;Q8NEY8-2;Q8NEY8-8;Q8NEY8-9	PPHLN_HUMAN	PPHLN1	Isoform of Q8NEY8, Isoform 2 of Periphilin-1	21.5297	21.4586	21.3361	20.8419	20.9628	21.0481
+	2.25254	0.887838	Q8NEZ4;Q8NEZ4-2;Q8NEZ4-3	Q8NEZ4;Q8NEZ4-2;Q8NEZ4-3;A0A7P0T9K8;A0A7P0T8F0;H0Y765;A0A7P0TAI3;A0A804HI08;A0A804HIK3;H7BY37;A0A804HLD4;A0A804HJR9;A0A804HJU5;A0A804HKW4;A0A804HKS3;H7C2V8	KMT2C_HUMAN	KMT2C	Histone-lysine N-methyltransferase 2C	20.5689	20.5154	20.6597	19.7504	19.9343	19.3957
+	1.43327	-2.42474	Q8NFA0;Q8NFA0-2	Q8NFA0;Q8NFA0-2;K7EKZ1;K7ENU6	UBP32_HUMAN	USP32	Ubiquitin carboxyl-terminal hydrolase 32	16.6983	15.4019	16.3579	19.1008	19.4114	17.2203
+	2.41521	1.01275	Q8NFC6	Q8NFC6;H0Y9Y2	BD1L1_HUMAN	BOD1L1	Biorientation of chromosomes in cell division protein 1-like 1	17.0752	17.0705	16.7572	15.7888	16.2142	15.8615
+	2.18884	0.637218	Q8NFH4	Q8NFH4;F8VTY2	NUP37_HUMAN	NUP37	Nucleoporin Nup37	19.3634	19.4041	19.1876	18.4789	18.7507	18.8137
+	2.55825	1.16164	Q8NFJ5	Q8NFJ5;A0A3B3ITN8;F5GWG3	RAI3_HUMAN	GPRC5A	Retinoic acid-induced protein 3	20.8143	20.9356	20.8212	19.3952	19.6994	19.9915
+	1.80903	1.35684	Q8NHW5	Q8NHW5	RLA0L_HUMAN	RPLP0P6	60S acidic ribosomal protein P0-like	22.2871	23.3039	22.4593	21.2109	21.5609	21.208
+	1.98736	-3.00186	Q8NHZ8	Q8NHZ8	CDC26_HUMAN	CDC26	Anaphase-promoting complex subunit CDC26	17.4603	15.6441	15.3623	19.1754	19.1568	19.1402
+	4.38353	0.589415	Q8NI36	Q8NI36;A0A0A0MTB8	WDR36_HUMAN	WDR36	WD repeat-containing protein 36	20.7183	20.7654	20.8105	20.1741	20.1507	20.2011
+	3.77979	0.475506	Q8NI77	Q8NI77	KI18A_HUMAN	KIF18A	Kinesin-like protein KIF18A	20.5212	20.5339	20.6298	20.0827	20.0778	20.0978
+	2.82051	0.676299	Q8TAA9;Q8TAA9-2	Q8TAA9;Q8TAA9-2	VANG1_HUMAN	VANGL1	Vang-like protein 1	20.503	20.7636	20.7265	19.9236	20.0197	20.021
+	2.67939	2.18016	Q8TAD7	Q8TAD7;F8VQD4	OCC1_HUMAN	OCC1	Overexpressed in colon carcinoma 1 protein	17.5842	17.2486	17.2833	14.6208	15.4054	15.5494
+	1.34739	0.393231	Q8TAD8	Q8TAD8	SNIP1_HUMAN	SNIP1	Smad nuclear-interacting protein 1	19.9174	20.0897	19.6978	19.383	19.6453	19.497
+	1.52993	1.73695	Q8TAF3	Q8TAF3;F8W9K4;F8W6P2;F8W7Q3;F8W7Y5;Q8TAF3-3	WDR48_HUMAN	WDR48	WD repeat-containing protein 48	16.9049	17.4414	16.9956	15.0172	16.3595	14.7544
+	2.54637	0.775141	Q8TAG9	Q8TAG9;Q8TAG9-2;E7EW84;F2Z3K0	EXOC6_HUMAN	EXOC6	Exocyst complex component 6	18.9093	19.103	19.0178	18.058	18.4202	18.2264
+	2.92352	0.50291	Q8TAQ2	Q8TAQ2;F8VZW6;F8VXC8;Q8TAQ2-2;Q8TAQ2-3	SMRC2_HUMAN	SMARCC2	SWI/SNF complex subunit SMARCC2	21.0584	20.9694	20.9056	20.4747	20.548	20.402
+	1.62805	2.14602	Q8TAT6;Q8TAT6-2	Q8TAT6;Q8TAT6-2;A0A0D9SFI9;I3L4U9	NPL4_HUMAN	NPLOC4	Nuclear protein localization protein 4 homolog	17.9573	17.6216	17.7977	15.3321	16.7966	14.8098
+	5.72626	0.662043	Q8TB72-3	Q8TB72;Q8TB72-2;Q8TB72-3;Q8TB72-4;A0A0C4DG68	PUM2_HUMAN	PUM2	Isoform of Q8TB72, Isoform 3 of Pumilio homolog 2	21.5795	21.5541	21.536	20.8787	20.9109	20.8939
+	1.3523	0.558057	Q8TBB5	Q8TBB5;Q8TBB5-2;Q8TBB5-3;H3BQH3;Q9UF94	KLDC4_HUMAN	KLHDC4	Kelch domain-containing protein 4	21.6894	21.8994	21.2706	21.1627	20.9722	21.0505
+	0.908978	-1.50388	Q8TBE0;Q8TBE0-2;Q8TBE0-3	Q8TBE0;Q8TBE0-2;Q8TBE0-3	BAHD1_HUMAN	BAHD1	Bromo adjacent homology domain-containing 1 protein	15.8004	15.8401	18.1135	18.0302	18.2994	17.936
+	2.74485	0.368808	Q8TBF4	Q8TBF4;F8VXY6;G3V1V1	ZCRB1_HUMAN	ZCRB1	Zinc finger CCHC-type and RNA-binding motif-containing protein 1	20.3968	20.3052	20.2324	19.9416	19.9165	19.9699
+	1.64795	0.356372	Q8TBK6;Q8TBK6-2	Q8TBK6;Q8TBK6-2;B3KVL5	ZCH10_HUMAN	ZCCHC10	Zinc finger CCHC domain-containing protein 10	19.0067	19.139	19.2919	18.8904	18.7049	18.7731
+	2.39849	0.735559	Q8TC07;Q8TC07-2	Q8TC07;Q8TC07-2;Q8TC07-3;C9JA93	TBC15_HUMAN	TBC1D15	TBC1 domain family member 15	18.9427	19.1555	19.149	18.2118	18.2822	18.5465
+	2.63699	2.63549	Q8TC12	Q8TC12;Q8TC12-3;G3V234;G3V2G6	RDH11_HUMAN	RDH11	Retinol dehydrogenase 11	18.2329	18.3404	17.87	15.8998	15.832	14.8051
+	1.88626	0.457486	Q8TCJ2	Q8TCJ2	STT3B_HUMAN	STT3B	Dolichyl-diphosphooligosaccharide--protein glycosyltransferase subunit STT3B	20.856	20.749	20.5085	20.2812	20.2742	20.1858
+	2.099	0.758222	Q8TD31;Q8TD31-2	Q8TD31;A2ABH1;B0S7V6;A0A0G2JP87;A0A0G2JPU2;Q8TD31-2;Q8TD31-3;A0A0G2JII5;A0A0G2JJ47	CCHCR_HUMAN	CCHCR1	Coiled-coil alpha-helical rod protein 1	20.8196	21.0057	21.1785	20.228	20.4481	20.0529
+	2.33029	1.17731	Q8TDB6	Q8TDB6	DTX3L_HUMAN	DTX3L	E3 ubiquitin-protein ligase DTX3L	20.2011	19.9599	19.8688	18.9768	19.0483	18.4728
+	2.36133	-0.858627	Q8TDD1	Q8TDD1	DDX54_HUMAN	DDX54	ATP-dependent RNA helicase DDX54	20.2723	20.424	20.036	21.0785	20.9513	21.2783
+	4.97095	0.737293	Q8TDM6	Q8TDM6;A0A0A0MSL1;Q8TDM6-2;Q8TDM6-4;Q8TDM6-5	DLG5_HUMAN	DLG5	Disks large homolog 5	22.2046	22.1938	22.2413	21.4304	21.495	21.5024
+	3.25231	2.92765	Q8TDX7	Q8TDX7;F8WAG2	NEK7_HUMAN	NEK7	Serine/threonine-protein kinase Nek7	17.9569	17.9119	17.2452	14.9746	14.4168	14.9397
+	2.73537	1.52416	Q8TEA8	Q8TEA8;A0A2R8Y6X2;A0A2R8YCT7;A0A087WZV9	DTD1_HUMAN	DTD1	D-aminoacyl-tRNA deacylase 1	19.7711	19.5216	19.2304	17.8443	18.2575	17.8488
+	1.34641	-2.26158	Q8TEC5	Q8TEC5	SH3R2_HUMAN	SH3RF2	E3 ubiquitin-protein ligase SH3RF2	16.4497	14.3424	16.7649	18.4338	18.1519	17.756
+	3.88233	0.542513	Q8TED0	Q8TED0;H0Y8P4;Q8TED0-3	UTP15_HUMAN	UTP15	U3 small nucleolar RNA-associated protein 15 homolog	20.5866	20.4786	20.5717	20.0196	20.0187	19.9711
+	3.67859	0.906884	Q8TEQ6	Q8TEQ6	GEMI5_HUMAN	GEMIN5	Gem-associated protein 5	21.8335	21.7812	21.6021	20.8445	20.8199	20.8317
+	2.00453	0.263178	Q8TER5	Q8TER5;Q8TER5-2;Q8TER5-3;Q8TER5-4	ARH40_HUMAN	ARHGEF40	Rho guanine nucleotide exchange factor 40	18.6407	18.6602	18.7379	18.4322	18.3254	18.4916
+	3.14225	0.67791	Q8TEW0;Q8TEW0-11;Q8TEW0-2	Q8TEW0;Q8TEW0-10;Q8TEW0-11;Q5VWU8;Q5VWV2;A0A8Q3WLH5;Q8TEW0-2;Q8TEW0-3;Q8TEW0-4;Q8TEW0-5;Q8TEW0-6;Q8TEW0-7;Q8TEW0-8;Q8TEW0-9	PARD3_HUMAN	PARD3	Partitioning defective 3 homolog	19.5675	19.557	19.3861	18.7422	18.8582	18.8766
+	2.61772	0.581038	Q8TEX9;Q8TEX9-2	Q8TEX9;Q8TEX9-2;H0YMR4;H0YN07;H0YN14	IPO4_HUMAN	IPO4	Importin-4	20.6164	20.7067	20.8474	20.1131	20.0702	20.2441
+	2.18815	0.376481	Q8TF01	Q8TF01;A0A2R8Y2Y1;A0A7P0Z4K1	PNISR_HUMAN	PNISR	Arginine/serine-rich protein PNISR	21.3436	21.4369	21.4284	20.9425	20.9805	21.1564
+	2.39997	1.03832	Q8TF72	Q13796;Q8TF72;Q9ULL8;C9IZC6;A0A2R8Y5P9;Q9ULL8-2;F5H3B6	SHRM3_HUMAN	SHROOM3	Protein Shroom3	25.7875	25.8341	25.7217	24.4169	24.8148	24.9966
+	3.43302	1.30506	Q8TF74	Q8TF74;A8MWR2;Q8TF74-2	WIPF2_HUMAN	WIPF2	WAS/WASL-interacting protein family member 2	18.6923	18.4024	18.4033	17.2158	17.07	17.297
+	1.57635	0.427027	Q8TF76	Q8TF76	HASP_HUMAN	HASPIN	Serine/threonine-protein kinase haspin	19.4575	19.6535	19.8647	19.3132	19.1878	19.1937
+	1.41948	0.788022	Q8WTV0-2;Q8WTV0-4	Q8WTV0;A0A0S2Z3I2;B7ZKQ9;A0A7P0T9I2;A0A7P0T913;A0A7P0T9B3;Q8WTV0-2;Q8WTV0-3;Q8WTV0-4;Q8WTV0-5;A0A7P0Z4E3;F5H4X0	SCRB1_HUMAN	SCARB1	Isoform of Q8WTV0, Isoform 1 of Scavenger receptor class B member 1	18.6459	19.3986	18.8864	18.0532	18.4538	18.06
+	2.33499	0.75689	Q8WU20	Q8WU20;F8VX65	FRS2_HUMAN	FRS2	Fibroblast growth factor receptor substrate 2	20.2854	20.4465	20.1074	19.4635	19.6979	19.4072
+	1.65191	0.468122	Q8WU79;Q8WU79-2;Q8WU79-3	Q8WU79;X6RCC3;Q8WU79-2;Q8WU79-3;A0A087WV97	SMAP2_HUMAN	SMAP2	Stromal membrane-associated protein 2	18.4891	18.8454	18.8055	18.2603	18.1292	18.3462
+	3.26999	1.04633	Q8WUA2	Q8WUA2	PPIL4_HUMAN	PPIL4	Peptidyl-prolyl cis-trans isomerase-like 4	21.8113	21.9308	21.5859	20.7673	20.6924	20.7293
+	2.65129	0.741783	Q8WUF5	Q8WUF5;K7EN03	IASPP_HUMAN	PPP1R13L	RelA-associated inhibitor	20.0344	20.0667	20.0547	19.2824	19.1419	19.5062
+	2.511	0.738134	Q8WUK0	Q8WUK0	PTPM1_HUMAN	PTPMT1	Phosphatidylglycerophosphatase and protein-tyrosine phosphatase 1	20.1267	20.0386	20.3651	19.4702	19.5267	19.319
+	1.55557	0.508477	Q8WUM0	Q8WUM0	NU133_HUMAN	NUP133	Nuclear pore complex protein Nup133	18.4802	18.6498	18.8357	17.9269	18.2468	18.2665
+	3.73519	0.776768	Q8WUM4	Q8WUM4;Q8WUM4-2	PDC6I_HUMAN	PDCD6IP	Programmed cell death 6-interacting protein	19.7193	19.7054	19.7802	18.9781	19.0395	18.857
+	1.78805	0.353743	Q8WUQ7;Q8WUQ7-2	Q8WUQ7;K7EIU6;Q8WUQ7-2;K7ENY9	CATIN_HUMAN	CACTIN	Splicing factor Cactin	21.2709	21.3055	21.0376	20.8589	20.7986	20.8952
+	6.15157	7.49231	Q8WUS8	Q8WUS8;E9PQ06	D42E1_HUMAN	SDR42E1	Short-chain dehydrogenase/reductase family 42E member 1	21.8516	21.5059	21.7965	14.2933	14.0509	14.3328
+	2.28053	0.562733	Q8WUY1	Q8WUY1;H0YAR9	THEM6_HUMAN	THEM6	Protein THEM6	20.9612	21.0224	21.0559	20.344	20.3611	20.6462
+	2.015	0.771412	Q8WUZ0-2	Q9BQE9;Q8WUZ0;Q4VC05;F8WDZ4;F8WE18;Q4VC05-2;Q8WUZ0-2;I3L4D5;I3L1Q2;Q9BQE9-3;Q9BQE9-4;F2Z3H6	BCL7C_HUMAN	BCL7C	Isoform of Q8WUZ0, Isoform 2 of B-cell CLL/lymphoma 7 protein family member C	19.7887	19.7848	19.9356	19.0251	19.3569	18.8129
+	2.14209	-0.509062	Q8WV44	Q8WV44;Q8WV44-3	TRI41_HUMAN	TRIM41	E3 ubiquitin-protein ligase TRIM41	19.0961	19.3713	19.3979	19.8538	19.7809	19.7578
+	8.12023	-3.93178	Q8WVC0	Q8WVC0	LEO1_HUMAN	LEO1	RNA polymerase-associated protein LEO1	20.7636	20.7616	20.8325	24.7126	24.7196	24.7209
+	1.31713	-1.45703	Q8WVD3	Q8WVD3;J3KRU4;J3KSI2;J3QKM8	RN138_HUMAN	RNF138	E3 ubiquitin-protein ligase RNF138	17.2484	17.77	16.0269	18.3939	18.5109	18.5116
+	3.40298	0.781672	Q8WVK2	Q8WVK2	SNR27_HUMAN	SNRNP27	U4/U6.U5 small nuclear ribonucleoprotein 27 kDa protein	22.0527	22.2631	22.052	21.3372	21.3208	21.3647
+	1.47567	-0.372415	Q8WVM0	Q8WVM0	TFB1M_HUMAN	TFB1M	Dimethyladenosine transferase 1, mitochondrial	21.4328	21.3689	21.4983	21.6961	21.6936	22.0275
+	2.06791	1.55057	Q8WVP7;Q8WVP7-3	Q8WVP7;Q8WVP7-3;H0Y6V6	LMBR1_HUMAN	LMBR1	Limb region 1 protein homolog	24.6123	24.6503	24.2701	22.9188	23.4968	22.4654
+	1.82306	0.455423	Q8WVX9	Q8WVX9;E9PPB8	FACR1_HUMAN	FAR1	Fatty acyl-CoA reductase 1	18.6354	18.9201	18.8279	18.4259	18.1931	18.3981
+	1.04529	0.632284	Q8WW12	Q8WW12;Q8WW12-2	PCNP_HUMAN	PCNP	PEST proteolytic signal-containing nuclear protein	19.4305	19.3973	18.8522	18.9734	18.5754	18.2344
+	4.35461	1.32072	Q8WWI1-3	Q8WWI1;J3KP06;F8WD26;H0YDQ3;H0YDG6;H0Y424;A0A0A0MTE2;E9PMP7;E9PMS6;E9PMT2;U3KQE6;A0A8V8TKQ1;Q8WWI1-2;Q8WWI1-3;Q8WWI1-4;Q8WWI1-5	LMO7_HUMAN	LMO7	Isoform of Q8WWI1, Isoform 3 of LIM domain only protein 7	22.8123	22.8139	22.9894	21.484	21.6089	21.5606
+	3.31407	0.766781	Q8WWK9-5	Q8WWK9;Q8WWK9-5;Q8WWK9-6	CKAP2_HUMAN	CKAP2	Isoform of Q8WWK9, Isoform 3 of Cytoskeleton-associated protein 2	22.1221	22.1466	22.2815	21.3835	21.5235	21.3429
+	3.92894	0.653181	Q8WWM7	Q8WWM7;H3BUF6;H3BSK9;Q8WWM7-2;Q8WWM7-3;Q8WWM7-4;Q8WWM7-5;Q8WWM7-6;Q8WWM7-8;Q8WWM7-9	ATX2L_HUMAN	ATXN2L	Ataxin-2-like protein	25.8942	25.8877	25.8175	25.205	25.2799	25.155
+	2.78599	0.881472	Q8WWM7-9	H3BUF6;Q8WWM7-9	ATX2L_HUMAN	ATXN2L	Isoform of Q8WWM7, Isoform 9 of Ataxin-2-like protein	21.2986	21.1392	21.5195	20.4995	20.444	20.3694
+	5.29041	0.722863	Q8WWQ0	Q8WWQ0;Q9NSI6;Q9NSI6-2;Q9NSI6-3;H7BZR9;H7C409;A0A8V8TQM4;A0A8V8TQZ3;A0A8V8TPK0;A0A8V8TPV5	PHIP_HUMAN	PHIP	PH-interacting protein	22.1316	22.1792	22.1596	21.4137	21.468	21.42
+	4.6703	1.0008	Q8WX92-2	Q8WX92;A0A5H1ZRP4;Q8WX92-2	NELFB_HUMAN	NELFB	Isoform of Q8WX92, Isoform 2 of Negative elongation factor B	19.7862	19.6662	19.7213	18.6724	18.7384	18.7605
+	6.26859	1.22022	Q8WX93;Q8WX93-3	Q8WX93;Q8WX93-3;Q8WX93-4;Q8WX93-5;Q8WX93-7;Q8WX93-8	PALLD_HUMAN	PALLD	Palladin	21.0765	21.0231	21.0557	19.8534	19.8046	19.8367
+	2.50848	0.445996	Q8WXD5	Q8WXD5	GEMI6_HUMAN	GEMIN6	Gem-associated protein 6	19.6006	19.8296	19.763	19.2611	19.3161	19.278
+	1.68504	2.24111	Q8WXE0	Q8WXE0;Q8WXE0-2	CSKI2_HUMAN	CASKIN2	Caskin-2	17.8571	18.3661	18.623	17.134	15.7103	15.2786
+	3.49366	3.22338	Q8WXF1;Q8WXF1-2	Q8WXF1;Q8WXF1-2;X6RDA4	PSPC1_HUMAN	PSPC1	Paraspeckle component 1	17.8204	17.7522	17.808	14.5357	15.0685	14.1063
+	3.5692	3.29787	Q8WXG6-2;Q8WXG6-3;Q8WXG6-4;Q8WXG6-5;Q8WXG6-8	Q8WXG6-2;Q8WXG6-3;Q8WXG6-4;Q8WXG6-5;Q8WXG6-6;Q8WXG6-8;A0A0A0MRB5	MADD_HUMAN	MADD	Isoform of Q8WXG6, Isoform 2 of MAP kinase-activating death domain protein	18.2091	18.6517	18.6275	15.6471	15.0772	14.8704
+	0.921754	-2.90699	Q8WXH0;Q8WXH0-2	Q8WXH0;Q8WXH0-10;Q8WXH0-11;Q8WXH0-12;Q8WXH0-13;Q8WXH0-2;Q8WXH0-3;Q8WXH0-4;Q8WXH0-5;Q8WXH0-6;Q8WXH0-7;A0A0C4DGK3	SYNE2_HUMAN	SYNE2	Nesprin-2	15.5824	20.5333	19.1099	21.2065	21.2927	21.4475
+	1.86576	1.41302	Q8WY22	Q8WY22;A0A5F9ZHY7	BRI3B_HUMAN	BRI3BP	BRI3-binding protein	20.4863	19.9513	20.6729	18.6637	19.4694	18.7383
+	3.93288	0.585294	Q8WY36	Q8WY36;C9J8D0;C9JYU6;C9JZA0;C9JSH4;C9K0D1;C9JA69;Q8WY36-2;Q8WY36-3	BBX_HUMAN	BBX	HMG box transcription factor BBX	22.4091	22.4807	22.4317	21.8208	21.9211	21.8236
+	1.34834	0.522311	Q8WY91	Q8WY91	THAP4_HUMAN	THAP4	Peroxynitrite isomerase THAP4	19.3268	18.7973	19.1325	18.6	18.705	18.3847
+	0.909832	-2.04428	Q8WYA6;Q8WYA6-2;Q8WYA6-3;Q8WYA6-4	Q8WYA6;Q8WYA6-2;Q8WYA6-3;Q8WYA6-4;A0A087WUB9	CTBL1_HUMAN	CTNNBL1	Beta-catenin-like protein 1	13.8064	14.9024	17.2904	17.3338	17.0458	17.7524
+	3.01058	0.568225	Q8WYP5;Q8WYP5-2;Q8WYP5-3	Q8WYP5;Q8WYP5-2;Q8WYP5-3	ELYS_HUMAN	AHCTF1	Protein ELYS	21.3441	21.3882	21.5516	20.838	20.8463	20.895
+	1.60606	0.495394	Q8WZ42-12	Q8WZ42;Q8WZ42-2;Q8WZ42-3;Q8WZ42-4;Q8WZ42-5;Q8WZ42-7;Q8WZ42-8;Q8WZ42-9;A0A0A0MTS7;A0A0A0MRA3;Q8WZ42-10;Q8WZ42-11;Q8WZ42-12;Q8WZ42-13	TITIN_HUMAN	TTN	Isoform of Q8WZ42, Isoform 12 of Titin	23.3709	23.3853	23.2686	22.6535	23.1099	22.7753
+	3.65864	0.518103	Q92499	Q92499;Q92499-2;A0A7I2YQ77;A0A7I2YQD0;A0A7I2V2M5;A0A7I2V421;A0A7I2V430;A0A7I2V4F0;A0A7I2V4J3;A0A7I2V4Q0;A0A7I2V5X8	DDX1_HUMAN	DDX1	ATP-dependent RNA helicase DDX1	23.6291	23.5641	23.6393	23.0308	23.1028	23.1445
+	2.68155	0.95461	Q92538-2;Q92538-3	Q92538;A0A7P0RGV0;Q92538-2;Q92538-3;A0A7I2YQ65;A0A7I2YQM2;A0A669KBG8;A0A669KB10;A0A7I2V2L5;A0A7I2V452;A0A7I2V514	GBF1_HUMAN	GBF1	Isoform of Q92538, Isoform 2 of Golgi-specific brefeldin A-resistance guanine nucleotide exchange factor 1	19.9895	20.3186	20.2521	19.2762	19.06	19.3602
+	2.23006	0.445316	Q92540	Q92540;Q92540-2;Q92540-4;Q92540-5;E9PD50;A0A8I5KSL3;A0A8I5KYV3	SMG7_HUMAN	SMG7	Nonsense-mediated mRNA decay factor SMG7	20.0178	20.1161	20.2702	19.7279	19.7292	19.6111
+	2.84336	0.626614	Q92541	Q92541	RTF1_HUMAN	RTF1	RNA polymerase-associated protein RTF1 homolog	22.2452	22.2812	22.0392	21.5933	21.5838	21.5087
+	2.18399	0.840123	Q92567;Q92567-2	Q92567;Q92567-2	F168A_HUMAN	FAM168A	Protein FAM168A	19.7748	19.5873	19.3953	18.8048	18.9159	18.5164
+	3.53931	0.769861	Q92572	Q92572	AP3S1_HUMAN	AP3S1	AP-3 complex subunit sigma-1	21.0986	20.9649	21.0176	20.3579	20.1846	20.2291
+	2.30969	1.77469	Q92597;Q92597-2;Q92597-3	Q92597;E7ESM1;Q92597-2;Q92597-3;A0A7I2ST14;E5RJY1	NDRG1_HUMAN	NDRG1	Protein NDRG1	16.7243	17.5504	17.3043	15.0525	15.7354	15.467
+	3.89043	0.9409	Q92598	Q92598;Q92598-2;Q92598-3;Q92598-4;A0A0A0MSM0	HS105_HUMAN	HSPH1	Heat shock protein 105 kDa	20.647	20.6	20.721	19.6343	19.6932	19.8177
[truncated: 2,303 more rows]

## Sheet: acYES_YES
Significant	-LOG(P-value)	Difference	Protein.Group	Protein.Ids	Protein.Names	Genes	First.Protein.Description	acYES_1	acYES_2	acYES_3	YES_1	YES_2	YES_3
+	3.16087	7.17914	Q5QP82	Q5QP82;A0A0A0MQT4;Q5QP82-2	DCA10_HUMAN	DCAF10	DDB1- and CUL4-associated factor 10	23.2725	23.2117	23.1475	17.5428	15.222	15.3295
+	2.74349	-0.688854	A0A0A0MQS2;F5H0Q6;K7EM61	A0A0A0MQS2;K7EM61;F5H0Q6	A0A0A0MQS2_HUMAN;F5H0Q6_HUMAN;K7EM61_HUMAN	CLASRP	Isoform of Q8N2M8, CLK4-associating serine/arginine-rich protein	17.2188	17.4256	17.4903	18.0145	18.03	18.1567
+	2.13345	-0.556241	A0A2R8YFE2	A0A2R8YFE2	A0A2R8YFE2_HUMAN	ACTB	Isoform of P60709, Actin, cytoplasmic 1 (Fragment)	17.9113	17.6077	17.79	18.1928	18.383	18.4019
+	2.403	-1.82092	A0A7I2V5J8;E5RI98	E5RI98;A0A7I2V5J8	A0A7I2V5J8_HUMAN;E5RI98_HUMAN	NPM1	Isoform of P06748, Nucleophosmin	15.9318	16.5461	15.9047	18.0988	17.512	18.2346
+	2.08676	-0.564569	A0A804HKC3	A0A804HKC3	A0A804HKC3_HUMAN	PRRC2B	Isoform of Q5JSZ5, Protein PRRC2B (Fragment)	19.6449	19.5099	19.8816	20.3235	20.1986	20.208
+	1.43195	2.23908	A4FU49;A4FU49-3;A4FU49-6	A4FU49;A4FU49-3;A4FU49-6	SH321_HUMAN	SH3D21	SH3 domain-containing protein 21	17.1745	16.4834	17.0566	13.4611	15.8698	14.6663
+	1.59909	0.883671	D6RG13	D6RG13	D6RG13_HUMAN	RPS3A	Isoform of P61247, 40S ribosomal protein S3a (Fragment)	24.508	24.676	24.6765	23.3212	24.1761	23.7123
+	2.50781	-0.464541	E7ERS3	Q86VM9;E7ERS3	E7ERS3_HUMAN	ZC3H18	Isoform of Q86VM9, Zinc finger CCCH domain-containing protein 18	20.706	20.6258	20.7676	21.275	21.1501	21.0679
+	3.22577	-0.848265	G5EA36;I3L328	G5EA36;I3L328	G5EA36_HUMAN;I3L328_HUMAN	CDC27	Isoform of P30260, Cell division cycle 27, isoform CRA_c	17.6439	17.4018	17.4079	18.3739	18.2687	18.3558
+	3.87264	-0.986718	H7BY16	P19338;C9JLB1;H7BY16;A0A7I2V2S8;A0A7I2V2U7;A0A7I2V349;A0A7I2V3F3;A0A7I2V428;A0A7I2V506;A0A7I2V5M5;A0A7I2V699	H7BY16_HUMAN	NCL	Isoform of P19338, Nucleolin	29.0181	29.1114	29.2266	30.1518	30.1209	30.0435
+	2.96454	-0.511091	O00303	O00303;H0YDT6	EIF3F_HUMAN	EIF3F	Eukaryotic translation initiation factor 3 subunit F	26.015	26.1028	26.1916	26.5977	26.6776	26.5674
+	3.40194	0.72496	O00468-6	O00468;O00468-3;O00468-4;O00468-5;O00468-6;O00468-7	AGRIN_HUMAN	AGRN	Isoform of O00468, Isoform 6 of Agrin	20.3907	20.317	20.4191	19.6692	19.742	19.5407
+	6.0322	-1.43227	O00505	O00629;O00505;H7C4F6;A0A7I2V340	IMA4_HUMAN	KPNA3	Importin subunit alpha-4	19.3422	19.3386	19.3974	20.8329	20.7631	20.779
+	4.61301	-0.743406	O14646;O14646-2	O14646;O14646-2	CHD1_HUMAN	CHD1	Chromodomain-helicase-DNA-binding protein 1	22.5343	22.543	22.5229	23.2488	23.3425	23.2391
+	3.74763	-1.03571	O14730	O14730;B4E1Q4;O14730-2	RIOK3_HUMAN	RIOK3	Serine/threonine-protein kinase RIO3	19.7578	19.9379	19.97	20.915	20.9979	20.86
+	4.07273	-0.66688	O14744	O14744;H0YJX6;H0YJ77;G3V5T6;O14744-2;O14744-3;O14744-5;O14744-4	ANM5_HUMAN	PRMT5	Protein arginine N-methyltransferase 5	24.0376	24.1001	23.9695	24.7138	24.7237	24.6703
+	2.1749	-0.969734	O15197;O15197-2	O15197;J3KQU5;F8WCM8;O15197-2;O15197-3;A0A0G2JNH7;A0A0G2JNC5	EPHB6_HUMAN	EPHB6	Ephrin type-B receptor 6	21.4055	21.8254	22.0368	22.6892	22.7839	22.7038
+	3.75549	0.646582	O15230	O15230	LAMA5_HUMAN	LAMA5	Laminin subunit alpha-5	19.8828	19.8442	19.9461	19.2261	19.3169	19.1903
+	2.62579	-0.436469	O15234	O15234	CASC3_HUMAN	CASC3	Protein CASC3	21.7938	21.8622	21.7272	22.2799	22.2824	22.1302
+	2.9168	-1.73934	O15235	O15235	RT12_HUMAN	MRPS12	28S ribosomal protein S12, mitochondrial	17.0128	17.2276	17.4318	18.6164	19.1035	19.1703
+	2.14863	0.656586	O15265;O15265-2	O15265;O15265-2;O15265-3;A0A2R8YDD6	ATX7_HUMAN	ATXN7	Ataxin-7	18.2396	18.0571	18.1023	17.4153	17.7028	17.311
+	2.16489	-0.880477	O15355	O15355	PPM1G_HUMAN	PPM1G	Protein phosphatase 1G	18.3951	18.5217	18.8642	19.6324	19.4985	19.2915
+	3.72799	-0.532679	O15371;O15371-3	O15371;B0QYA5;B0QYA6;B0QYA8;O15371-3	EIF3D_HUMAN	EIF3D	Eukaryotic translation initiation factor 3 subunit D	25.4218	25.4182	25.3715	25.928	26.004	25.8775
+	3.16296	-0.469859	O15372	O15372;B3KS98;E5RJT0	EIF3H_HUMAN	EIF3H	Eukaryotic translation initiation factor 3 subunit H	26.3494	26.226	26.2352	26.7319	26.7948	26.6934
+	2.05879	0.600425	O15397	O15397;O15397-2;F5H244	IPO8_HUMAN	IPO8	Importin-8	18.8016	18.6566	19.0754	18.2493	18.1974	18.2857
+	2.50854	-2.69068	O43149	O43149;O43149-3	ZZEF1_HUMAN	ZZEF1	Zinc finger ZZ-type and EF-hand domain-containing protein 1	16.1632	14.8841	16.0979	18.2964	18.5381	18.3828
+	2.38615	0.497903	O43264	O43264;O43264-2	ZW10_HUMAN	ZW10	Centromere/kinetochore protein zw10 homolog	17.8832	17.9542	18.1097	17.3981	17.5756	17.4797
+	5.64778	-3.21717	O43719	O43719	HTSF1_HUMAN	HTATSF1	HIV Tat-specific factor 1	20.6246	20.8127	20.688	23.9359	24.0196	23.8214
+	4.31595	4.49463	O60437	O60437;K7EKI8	PEPL_HUMAN	PPL	Periplakin	19.6259	19.7695	19.5656	15.2924	14.7059	15.4787
+	2.93365	-0.563763	O60684	O60684;O15131;A0A8V8TMV2;A0A8V8TL88;A0A8V8TLL2;S4R3E5	IMA7_HUMAN	KPNA6	Importin subunit alpha-7	19.2445	19.1752	19.284	19.9063	19.6979	19.7909
+	4.5422	0.37969	O75165	O75165;A0A3B3IRM0	DJC13_HUMAN	DNAJC13	DnaJ homolog subfamily C member 13	22.8279	22.7895	22.8402	22.4219	22.4439	22.4527
+	2.32019	0.45225	O75251;O75251-2	O75251;O75251-2;F5GXJ1;F5H5N1	NDUS7_HUMAN	NDUFS7	NADH dehydrogenase [ubiquinone] iron-sulfur protein 7, mitochondrial	17.9996	18.06	17.9089	17.6423	17.5558	17.4137
+	2.24707	-0.616312	O75781-2	O75781-2;A0A087WWY4	PALM_HUMAN	PALM	Isoform of O75781, Isoform 2 of Paralemmin-1	17.8734	17.9485	17.6291	18.5262	18.3192	18.4545
+	3.20316	-0.548168	O75821	O75821;K7EL20;K7ENA8;K7EP16;K7ER90	EIF3G_HUMAN	EIF3G	Eukaryotic translation initiation factor 3 subunit G	25.9506	25.8608	25.831	26.5054	26.4263	26.3551
+	3.15101	-0.564774	O75822	O75822;O75822-2;O75822-3	EIF3J_HUMAN	EIF3J	Eukaryotic translation initiation factor 3 subunit J	23.7939	23.7254	23.7579	24.421	24.2251	24.3255
+	2.51979	3.8908	O75843	O75843;H0YJ08	AP1G2_HUMAN	AP1G2	AP-1 complex subunit gamma-like 2	19.5356	17.7424	18.1808	14.4177	14.2334	15.1353
+	2.75586	-0.434805	O94915	O94915;A0A286YEZ9;H0Y9X0;A0A2C9F2R7	FRYL_HUMAN	FRYL	Protein furry homolog-like	20.6553	20.7004	20.7658	21.0521	21.2207	21.1531
+	3.46969	-0.806258	O95071;O95071-2	O95071;O95071-2;E7EMW7	UBR5_HUMAN	UBR5	E3 ubiquitin-protein ligase UBR5	19.8126	19.9501	19.814	20.6355	20.7702	20.5897
+	4.0969	2.76757	O95153-2	O95153;O95153-2;O95153-3;J3KT64;A0A0C4DGN5	RIMB1_HUMAN	TSPOAP1	Isoform of O95153, Isoform 2 of Peripheral-type benzodiazepine receptor-associated protein 1	17.4716	17.7625	17.8321	14.6807	15.112	14.9709
+	4.82532	3.81293	O95302	O95302;O95302-3	FKBP9_HUMAN	FKBP9	Peptidyl-prolyl cis-trans isomerase FKBP9	18.7043	18.9406	18.9563	15.2635	15.0776	14.8213
+	3.38939	0.426638	O95758;O95758-1;O95758-2;O95758-4;O95758-5;O95758-6	O95758;O95758-1;O95758-2;O95758-4;O95758-5;O95758-6;O95758-7;X6R242	PTBP3_HUMAN	PTBP3	Polypyrimidine tract-binding protein 3	19.556	19.5324	19.6371	19.1565	19.1842	19.105
+	3.29728	0.333085	O95816	O95816;O95816-2	BAG2_HUMAN	BAG2	BAG family molecular chaperone regulator 2	22.8092	22.7871	22.7872	22.5005	22.4847	22.399
+	1.99425	1.96701	P04181	P04181	OAT_HUMAN	OAT	Ornithine aminotransferase, mitochondrial	18.1479	18.1889	17.8909	16.8383	16.1001	15.3883
+	3.15402	0.664186	P05067-5;P05067-6	H7C2L2;P05067-5;P05067-6	A4_HUMAN	APP	Isoform of P05067, Isoform L-APP696 of Amyloid-beta precursor protein	22.3513	22.3201	22.3415	21.6095	21.8128	21.5981
+	1.46291	2.70954	P06756;P06756-2;P06756-3	P06756;P06756-2;P06756-3;H7BZG1;A0A8V8TKF7;A0A8V8TKG0;A0A8V8TKI2;A0A8V8TLW4;A0A8V8TLW9;A0A8V8TLN8	ITAV_HUMAN	ITGAV	Integrin alpha-V	17.3799	17.2663	17.2669	16.2458	14.1792	13.3594
+	5.06184	-0.951104	P07199	P07199	CENPB_HUMAN	CENPB	Major centromere autoantigen B	21.3904	21.3888	21.3702	22.3836	22.2732	22.3459
+	3.90814	-0.750439	P07910-2	P07910;B4DY08;G3V5V7;G3V555;G3V4W0;G3V575;G3V576;G3V4C1;G3V2Q1;G3V2D6;P07910-2;P07910-3;P07910-4	HNRPC_HUMAN	HNRNPC	Isoform of P07910, Isoform C1 of Heterogeneous nuclear ribonucleoproteins C1/C2	24.7782	24.8398	24.9311	25.6233	25.6268	25.5504
+	2.8338	0.604408	P07942	P07942;C9J296;E7EPA6;G3XAI2;A0A7I2V2J0;A0A7I2V2R2;A0A7I2V2T9;A0A7I2V3I5;A0A7I2V3J7;A0A7I2V407;A0A7I2V4J9;A0A7I2V5R0;A0A7I2V5X5;A0A7I2V682;A0A7I2V5T9	LAMB1_HUMAN	LAMB1	Laminin subunit beta-1	19.1286	19.3707	19.1827	18.6655	18.5778	18.6256
+	2.0745	-1.82724	P09629	P09630;P31267;P09067;Q00444;P09629;P31274;P20719;P28356;P17481;P31268;P17482;P31273;P17509;P09630-2;I3L3R1;I3L383;V9GYH0	HXB7_HUMAN	HOXB7	Homeobox protein Hox-B7	16.5819	16.7946	15.5719	18.1438	18.1045	18.1819
+	2.02223	3.53116	P10124	P10124	SRGN_HUMAN	SRGN	Serglycin	19.3846	19.1705	19.1966	14.2389	16.2235	16.6959
+	2.08681	-1.43091	P10599	P10599;P10599-2	THIO_HUMAN	TXN	Thioredoxin	19.3939	20.044	19.5793	21.4848	21.1053	20.7199
+	2.02332	0.829837	P11047	P11047	LAMC1_HUMAN	LAMC1	Laminin subunit gamma-1	19.6543	20.005	20.047	18.8194	19.1949	19.2026
+	3.92928	1.72245	P11498	P11498	PYC_HUMAN	PC	Pyruvate carboxylase, mitochondrial	21.6057	21.8636	21.6047	19.8464	20.1107	19.9495
+	1.36288	-2.91976	P16152	P16152	CBR1_HUMAN	CBR1	Carbonyl reductase [NADPH] 1	15.4713	18.0677	14.8171	18.9289	19.294	18.8925
+	3.06737	0.349027	P16989-2	P16989-2	YBOX3_HUMAN	YBX3	Isoform of P16989, Isoform 2 of Y-box-binding protein 3	21.3507	21.4351	21.4491	21.1077	21.0264	21.0537
+	3.94843	-0.524646	P17480	P17480;P17480-2;E9PMM2;E9PKP7	UBF1_HUMAN	UBTF	Nucleolar transcription factor 1	25.6461	25.5853	25.6797	26.1899	26.1749	26.1203
+	2.00794	-1.85071	P19338	P19338;C9JLB1;A0A7I2V2U7;A0A7I2V349;A0A7I2V3F3;A0A7I2V428;A0A7I2V506;A0A7I2V5M5	NUCL_HUMAN	NCL	Nucleolin	21.3585	22.2055	22.6747	23.8782	23.7758	24.1368
+	4.4837	-0.915817	P19784	P19784;H3BNI9	CSK22_HUMAN	CSNK2A2	Casein kinase II subunit alpha'	21.9328	21.9808	21.9627	22.875	22.8013	22.9475
+	1.84918	0.772066	P20929-2;P20929-3	P20929;P20929-2;P20929-3;P20929-4	NEBU_HUMAN	NEB	Isoform of P20929, Isoform 2 of Nebulin	16.7971	16.4839	16.3905	16.0033	15.8254	15.5266
+	2.982	-0.428366	P21127	Q9UQ88;P21127;Q9UQ88-2;Q9UQ88-3;Q9UQ88-4;Q9UQ88-9;P21127-10;P21127-12;A0A0D9SEI3;A0A0D9SEN2;A0A0D9SER5;P21127-2;P21127-3;P21127-4;P21127-5;P21127-6;P21127-8;P21127-9;Q9UQ88-10;Q5QPR3;Q5QPR4	CD11B_HUMAN	CDK11B	Cyclin-dependent kinase 11B	22.0473	22.1221	22.1642	22.6129	22.51	22.4958
+	3.08317	-0.504203	P25440;P25440-2	P25440;H0Y6K2;A0A140T9E9;A0A140T9I1;P25440-2;P25440-3;P25440-4;A0A0G2JK44;A0A0G2JHN8	BRD2_HUMAN	BRD2	Bromodomain-containing protein 2	21.0522	20.9206	20.9602	21.523	21.5202	21.4023
+	1.65008	1.05944	P27144	P27144;A0A8I5KW96;F8VS11	KAD4_HUMAN	AK4	Adenylate kinase 4, mitochondrial	17.5284	16.7163	17.1035	16.4029	15.9302	15.8367
+	2.5032	4.19911	P29350-4	P29350;P29350-2;P29350-3;P29350-4	PTN6_HUMAN	PTPN6	Isoform of P29350, Isoform 4 of Tyrosine-protein phosphatase non-receptor type 6	19.2908	19.4316	19.7085	14.9919	16.5175	14.3241
+	3.21472	-0.71889	P30260-2	P30260;P30260-2;G5EA36	CDC27_HUMAN	CDC27	Isoform of P30260, Isoform 2 of Cell division cycle protein 27 homolog	19.7808	19.5951	19.7399	20.4463	20.4924	20.3338
+	4.40729	0.327597	P31943	P31943;G8JLB6;H0YB39	HNRH1_HUMAN	HNRNPH1	Heterogeneous nuclear ribonucleoprotein H	24.2618	24.2529	24.2914	23.9502	23.9175	23.9555
+	1.98175	2.64757	P34896	P34896;J3KRK5;J3KRZ5;P34896-2;P34896-3	GLYC_HUMAN	SHMT1	Serine hydroxymethyltransferase, cytosolic	19.0165	17.6172	18.6687	15.5691	15.2243	16.5662
+	2.40654	0.568176	P35228;P35228-2	P35228;P35228-2;A0A2R8YDS4;A0A8V8TKX9	NOS2_HUMAN	NOS2	Nitric oxide synthase, inducible	20.8403	20.5352	20.6541	20.0555	20.0986	20.1709
+	4.17481	-0.614434	P35606;P35606-2	P35606;P35606-2;H0YAC7;H0Y938;A0A7I2YQF9;A0A7I2V258;A0A7I2V3G0	COPB2_HUMAN	COPB2	Coatomer subunit beta'	22.1751	22.0955	22.1134	22.7364	22.7002	22.7908
+	2.766	0.392804	P35637;P35637-2	P35637;H3BPE7;P35637-2	FUS_HUMAN	FUS	RNA-binding protein FUS	25.2739	25.2697	25.3463	24.9917	24.8852	24.8346
+	2.76971	0.387037	P38159	P38159;Q96E39;H3BUY5;P38159-2	RBMX_HUMAN	RBMX	RNA-binding motif protein, X chromosome	22.6339	22.7576	22.6657	22.245	22.367	22.2841
+	3.45028	-0.835099	P39687	P39687;O43423;H0YN26	AN32A_HUMAN	ANP32A	Acidic leucine-rich nuclear phosphoprotein 32 family member A	20.6626	20.6938	20.8753	21.6444	21.5561	21.5365
+	1.81403	1.13541	P41134;P41134-2	P41134;P41134-2	ID1_HUMAN	ID1	DNA-binding protein inhibitor ID-1	18.1643	17.4559	17.5873	16.4979	16.9427	16.3607
+	2.4557	-0.869034	P41567	O60739;P41567;K7EM18	EIF1_HUMAN	EIF1	Eukaryotic translation initiation factor 1	18.3488	18.7804	18.7478	19.5399	19.4574	19.4869
+	2.20578	1.07299	P41970	P41970	ELK3_HUMAN	ELK3	ETS domain-containing protein Elk-3	18.8329	18.7094	18.5495	17.5339	17.3561	17.9828
+	1.53363	-1.39713	P45880;P45880-1;P45880-2	P45880;P45880-1;P45880-2;A0A0A0MR02	VDAC2_HUMAN	VDAC2	Voltage-dependent anion-selective channel protein 2	15.7579	16.6509	15.833	17.0108	18.0593	17.3631
+	1.60319	-3.06246	P51003	P51003;Q9NRJ5;P51003-2;H0YJ00;G3XAH6	PAPOA_HUMAN	PAPOLA	Poly(A) polymerase alpha	16.4891	15.6594	18.5991	19.9502	20.0305	19.9543
+	3.63664	0.406944	P51116	P51116	FXR2_HUMAN	FXR2	RNA-binding protein FXR2	26.0034	25.9545	25.965	25.576	25.6123	25.5137
+	2.40355	-0.610699	P51398;P51398-2;P51398-3	P51398;V9GYL9;V9GZ03;P51398-2;P51398-3	RT29_HUMAN	DAP3	28S ribosomal protein S29, mitochondrial	20.206	20.498	20.4747	20.977	21.0841	20.9498
+	2.48998	-0.839059	P51825-2;P51825-3	P51825;P51825-2;P51825-3;A0A669KBI3;F5GXF9	AFF1_HUMAN	AFF1	Isoform of P51825, Isoform 2 of AF4/FMR2 family member 1	18.527	18.388	18.7214	19.4323	19.5136	19.2077
+	1.77252	-1.26258	P51955;P51955-4	P51955;P51955-2;P51955-3;P51955-4;F6U4U2	NEK2_HUMAN	NEK2	Serine/threonine-protein kinase Nek2	15.6107	16.6769	16.1614	17.3708	17.5802	17.2857
+	3.14492	-0.773044	P52294	P52294	IMA5_HUMAN	KPNA1	Importin subunit alpha-5	19.2668	19.5142	19.4833	20.2266	20.1413	20.2156
+	4.78506	-0.507305	P53621	P53621;P53621-2;A0A3B3IS84;A0A3B3IT15;A0A3B3ISC6;A0A3B3ITV3;A0A3B3IU89	COPA_HUMAN	COPA	Coatomer subunit alpha	22.3378	22.4022	22.378	22.8909	22.8628	22.8863
+	2.51022	-0.684196	P54105	P54105;J3KN38;E9PQ83;E9PMI6;E9PJF4	ICLN_HUMAN	CLNS1A	Methylosome subunit pICln	19.2245	19.0129	19.2865	19.7395	19.862	19.975
+	3.00353	0.355145	P55795	P31943;P55795;G8JLB6;D6RBM0;H0YB39;H0YBD7;E9PCY7;E7EN40;E5RGV0	HNRH2_HUMAN	HNRNPH2	Heterogeneous nuclear ribonucleoprotein H2	22.6167	22.5472	22.6239	22.3051	22.1948	22.2224
+	4.44018	-0.542393	P55884;P55884-2	P55884;P55884-2;C9JZG1;C9JQN7	EIF3B_HUMAN	EIF3B	Eukaryotic translation initiation factor 3 subunit B	26.0715	26.1144	26.0984	26.5906	26.6701	26.6507
+	2.04407	0.583315	P56556	P56556;A0A2Y9D025;R4GN43	NDUA6_HUMAN	NDUFA6	NADH dehydrogenase [ubiquinone] 1 alpha subcomplex subunit 6	16.0768	15.9551	16.0524	15.6011	15.2151	15.5182
+	3.22153	-0.545987	P60228	P60228;B3KW56;E5RGA2;E5RHS5;A0A7I2V2H9;A0A7I2V2W0;A0A7I2V3I0;A0A7I2V3I2;A0A7I2V3S3;A0A7I2V4B4;A0A7I2V5P9;A0A7I2V5Z6	EIF3E_HUMAN	EIF3E	Eukaryotic translation initiation factor 3 subunit E	25.7312	25.7851	25.7302	26.2872	26.3893	26.208
+	2.70537	-0.416334	P61221	P61221;D6RGF4;D6R9I9;H0Y990	ABCE1_HUMAN	ABCE1	ATP-binding cassette sub-family E member 1	19.9072	20.0198	19.85	20.3574	20.2854	20.3832
+	2.20789	0.483121	P62805	P62805	H4_HUMAN	H4C16	Histone H4	32.9386	32.7375	32.7737	32.2015	32.4246	32.3743
+	3.51646	-1.15228	P67870	P67870;N0E472;Q5SRQ3;Q5SRQ6;A0A7I2YQ78;A0A0G2JM12	CSK2B_HUMAN	CSNK2B	Casein kinase II subunit beta	22.2546	22.5134	22.4919	23.5737	23.4796	23.6633
+	4.94498	-1.0696	P68400	Q8NEV1;P68400;A0A2R8Y7T1;A0A2R8Y797;A0A2R8Y3W6;A0A2R8Y5A0;A0A2R8Y4H0;A0A2R8Y4D6;E7EU96;A0A2R8YDY7;A0A2R8YDP2;A0A2R8YD58;A0A2R8YCK2;A0A2R8YFU2;A0A2R8YEW1;A0A2R8YF43;A0A2R8YF47;A0A2R8YEL7;V9GY80;V9GYA2	CSK21_HUMAN	CSNK2A1	Casein kinase II subunit alpha	22.3966	22.4169	22.387	23.4641	23.4057	23.5396
+	3.16813	-0.486553	P78344	P78344;D3DQV9;H0YEC5;H0YD77;H0YE44;H0YCH5;H0Y3P2;P78344-2	IF4G2_HUMAN	EIF4G2	Eukaryotic translation initiation factor 4 gamma 2	21.05	21.0927	21.1163	21.6515	21.5789	21.4881
+	2.67266	-0.443576	P78362-2	P78362;P78362-2;F8WBW4;H7C5L6;H7C521	SRPK2_HUMAN	SRPK2	Isoform of P78362, Isoform 2 of SRSF protein kinase 2	22.4241	22.4665	22.3985	22.919	22.755	22.9457
+	3.01048	-3.89479	P82673	P82673	RT35_HUMAN	MRPS35	28S ribosomal protein S35, mitochondrial	15.7088	15.6747	14.354	19.0294	19.1886	19.2039
+	2.89012	-0.832237	P82675	P82675;P82675-2;A0A8Q3WKG3;A0A8Q3WKL2;A0A8Q3SIP9;A0A8Q3SHY8	RT05_HUMAN	MRPS5	28S ribosomal protein S5, mitochondrial	19.8914	19.8475	19.6548	20.5641	20.7766	20.5496
+	1.63809	-0.890475	P82912;P82912-2	P82912;P82912-2;P82912-3	RT11_HUMAN	MRPS11	28S ribosomal protein S11, mitochondrial	19.4755	20.2112	19.5944	20.814	20.6636	20.475
+	2.50762	-0.678612	P82914	P82914	RT15_HUMAN	MRPS15	28S ribosomal protein S15, mitochondrial	20.0524	19.9625	19.9097	20.7337	20.7682	20.4585
+	2.4484	-0.865916	P82921	P82921	RT21_HUMAN	MRPS21	28S ribosomal protein S21, mitochondrial	17.5288	17.5035	17.8782	18.3765	18.5042	18.6276
+	2.16375	-3.07156	P82932	P82932	RT06_HUMAN	MRPS6	28S ribosomal protein S6, mitochondrial	16.8266	15.8972	14.789	19.0355	18.6889	19.003
+	4.19207	0.419422	P98160	P98160	PGBM_HUMAN	HSPG2	Basement membrane-specific heparan sulfate proteoglycan core protein	20.3172	20.2438	20.2916	19.8788	19.8722	19.8432
+	1.34864	-3.23113	Q01105	Q01105;A0A8I5KS71;A0A8I5KTZ2	SET_HUMAN	SET	Protein SET	18.1624	15.2344	18.8706	20.5086	20.546	20.9061
+	5.02918	-2.39959	Q01105-2	P0DME0;Q01105;Q01105-2;Q01105-3;Q01105-4;A0A8J8YYJ1;A0A8I5KS71;A0A0C4DFV9	SET_HUMAN	SET	Isoform of Q01105, Isoform 2 of Protein SET	21.7373	21.7342	21.4882	24.0497	24.0894	24.0193
+	1.83968	3.02082	Q04912;Q04912-2;Q04912-7	Q04912;J3KQS7;Q04912-2;Q04912-5;Q04912-7	RON_HUMAN	MST1R	Macrophage-stimulating protein receptor	19.0053	18.7427	18.9934	17.3201	15.4107	14.9481
+	1.767	1.96153	Q05823	Q05823;Q05823-2	RN5A_HUMAN	RNASEL	2-5A-dependent ribonuclease	18.4147	19.0765	18.3589	17.5378	16.153	16.2747
+	3.3251	-5.16739	Q06945	Q06945	SOX4_HUMAN	SOX4	Transcription factor SOX-4	14.6826	14.3839	15.598	19.7888	20.7175	19.6605
+	2.73981	0.476737	Q08211	Q08211	DHX9_HUMAN	DHX9	ATP-dependent RNA helicase A	24.7986	24.9509	24.7567	24.3877	24.305	24.3832
+	2.4707	-1.56877	Q13023	Q13023;G3V3H7;Q13023-2	AKAP6_HUMAN	AKAP6	A-kinase anchor protein 6	21.8369	22.5323	22.3674	24.0886	23.7198	23.6345
+	2.79303	-0.84714	Q13042	Q13042;Q13042-2;Q13042-3;Q13042-4;Q5T8C6;A0A3B3ISD2	CDC16_HUMAN	CDC16	Cell division cycle protein 16 homolog	19.8295	19.5407	19.7953	20.4436	20.6562	20.6071
+	5.37017	2.57451	Q13085	Q13085;Q13085-2;Q13085-3;Q13085-4;Q59FY4;A0A087WWN5	ACACA_HUMAN	ACACA	Acetyl-CoA carboxylase 1	23.6517	23.8811	23.6753	21.1281	21.172	21.1845
+	3.86713	-0.671007	Q13347	Q13347;A0A7P0MRT9;Q5TFK1;A0A7I2YQF8;A0A7I2YQN1;A0A7I2YQI2;A0A7I2YQI6;A0A7I2YQP9;A0A7I2YQU2;A0A7I2YQX4;A0A7I2V2M3;A0A7I2V391;A0A7I2V3K6;A0A7I2V3N2;A0A7I2V3T4;A0A7I2V3U3;A0A7I2V4C2;A0A7I2V4S8;A0A7I2V5E4;A0A7I2V607;A0A7I2V613;A0A7I2V5V8;A0A7I2V685;A0A7I2V640	EIF3I_HUMAN	EIF3I	Eukaryotic translation initiation factor 3 subunit I	25.3262	25.3832	25.4537	26.0866	26.088	26.0015
+	3.45315	-0.794145	Q13428-3	Q13428;Q13428-2;Q13428-3;Q13428-4;Q13428-5;Q13428-6;Q13428-7;Q13428-8;E7ETY2;H0Y8Y7;A0A6I8PRA0;A0A3B3IS06	TCOF_HUMAN	TCOF1	Isoform of Q13428, Isoform 3 of Treacle protein	22.7129	22.8302	22.8688	23.6815	23.6119	23.501
+	4.13562	-0.80567	Q13428-6	Q13428;Q13428-2;Q13428-4;Q13428-6	TCOF_HUMAN	TCOF1	Isoform of Q13428, Isoform 6 of Treacle protein	20.106	19.9603	19.9885	20.8448	20.7893	20.8376
+	2.82222	-0.50301	Q13442	Q13442	HAP28_HUMAN	PDAP1	28 kDa heat- and acid-stable phosphoprotein	22.2946	22.1208	22.1461	22.6724	22.7594	22.6387
+	2.64371	0.478296	Q13492;Q13492-2;Q13492-3;Q13492-5	Q13492;E9PLJ8;E9PKP6;E9PI56;Q13492-2;Q13492-3;Q13492-4;Q13492-5	PICAL_HUMAN	PICALM	Phosphatidylinositol-binding clathrin assembly protein	19.0635	19.02	19.1759	18.5119	18.627	18.6856
+	3.93657	0.961379	Q13501	Q13501;C9J6J8;D6RBF1;E3W990;E7EMC7	SQSTM_HUMAN	SQSTM1	Sequestosome-1	24.3303	24.1728	24.1202	23.2307	23.2691	23.2394
+	2.88756	0.368672	Q13619	Q13619;A0A087WWN2	CUL4A_HUMAN	CUL4A	Cullin-4A	21.0507	21.131	21.021	20.6956	20.7558	20.6453
+	8.52187	-1.10993	Q13895	Q13895	BYST_HUMAN	BYSL	Bystin	23.446	23.4533	23.4601	24.5575	24.5627	24.569
+	3.48201	0.529759	Q14145	Q14145;K7EJD8;K7EJ49;K7ESE0	KEAP1_HUMAN	KEAP1	Kelch-like ECH-associated protein 1	20.428	20.3931	20.463	19.8217	19.9645	19.9086
+	2.16774	0.491812	Q14146	Q14146;Q5VYD0	URB2_HUMAN	URB2	Unhealthy ribosome biogenesis protein 2 homolog	19.5064	19.6145	19.4345	18.8972	19.0094	19.1732
+	2.78988	-0.500745	Q14152	Q14152;Q14152-2	EIF3A_HUMAN	EIF3A	Eukaryotic translation initiation factor 3 subunit A	26.2985	26.2381	26.2031	26.722	26.8613	26.6586
+	2.35088	0.594479	Q14157;Q14157-5	Q14157;H0Y5H6;Q14157-5	UBP2L_HUMAN	UBAP2L	Ubiquitin-associated protein 2-like	22.4877	22.2274	22.3219	21.7507	21.8714	21.6314
+	2.96564	0.356835	Q14444;Q14444-2	Q14444;G3V153;E9PLA9;Q14444-2	CAPR1_HUMAN	CAPRIN1	Caprin-1	23.9854	24.0311	24.051	23.7251	23.6759	23.5961
+	4.37246	-0.303208	Q14527	Q14527;A0A0C4DGA6	HLTF_HUMAN	HLTF	Helicase-like transcription factor	22.0915	22.0426	22.0753	22.3744	22.3615	22.3832
+	4.84607	-1.51851	Q14978-2	A0A0A0MRM9;Q14978-2	NOLC1_HUMAN	NOLC1	Isoform of Q14978, Isoform Beta of Nucleolar and coiled-body phosphoprotein 1	24.289	24.4273	24.491	25.9292	25.9157	25.9179
+	3.4508	-1.70819	Q14978-3	S4R341;Q14978-3	NOLC1_HUMAN	NOLC1	Isoform of Q14978, Isoform 3 of Nucleolar and coiled-body phosphoprotein 1	20.5198	20.5644	20.3093	22.1914	21.9393	22.3874
+	1.81418	0.669912	Q15004	Q15004;Q15004-2;H0YMA4;A0A0U1RQC1;A0A0U1RQM0	PAF15_HUMAN	PCLAF	PCNA-associated factor	18.5078	18.2984	18.7845	17.9605	17.6891	17.9312
+	2.06498	-0.620754	Q15149-8	Q15149-8	PLEC_HUMAN	PLEC	Isoform of Q15149, Isoform 8 of Plectin	19.5714	19.8449	19.4409	20.3398	20.1953	20.1843
+	1.7562	1.07591	Q15363	Q15363;E7EQ72;F5GX39	TMED2_HUMAN	TMED2	Transmembrane emp24 domain-containing protein 2	16.256	16.3826	16.4682	15.7673	15.2752	14.8365
+	4.65906	-0.80292	Q15650	Q15650;H0YL91;H3BMU9	TRIP4_HUMAN	TRIP4	Activating signal cointegrator 1	23.693	23.6976	23.712	24.474	24.5731	24.4643
+	3.03981	0.74957	Q16531	Q16531;A0A7P0T965;A0A7P0T870;A0A7P0TAK7;A0A7P0Z4L2;A0A7P0Z3Z5;A0A7P0Z4B9;F5GZY8;F5GY55;F5GWI0;F5H2L3	DDB1_HUMAN	DDB1	DNA damage-binding protein 1	23.7813	23.9262	23.8419	23.125	22.9617	23.214
+	5.08261	-0.646295	Q2NL82	Q2NL82	TSR1_HUMAN	TSR1	Pre-rRNA-processing protein TSR1 homolog	26.2766	26.2544	26.31	26.9197	26.9044	26.9557
+	2.38565	-1.38353	Q3L8U1;Q3L8U1-2;Q3L8U1-3	Q3L8U1;H3BTW3;Q3L8U1-2;Q3L8U1-3;A0A087WU44	CHD9_HUMAN	CHD9	Chromodomain-helicase-DNA-binding protein 9	17.496	18.1888	17.8253	19.4231	19.0018	19.2359
+	1.6909	0.903639	Q49AM3	Q49AM3;Q49AM3-2;G5E9H3	TTC31_HUMAN	TTC31	Tetratricopeptide repeat protein 31	18.4482	18.8078	18.7234	18.0901	17.3494	17.8291
+	3.98899	-0.514817	Q53EL6;Q53EL6-2	Q53EL6;Q53EL6-2;Q5VZS7	PDCD4_HUMAN	PDCD4	Programmed cell death protein 4	25.0329	25.0184	24.9844	25.5863	25.5039	25.4899
+	1.57514	2.30311	Q5JSH3;Q5JSH3-2	Q5JSH3;H7BY83;Q5JSH3-2;Q5JSH3-3;Q5JSH3-4	WDR44_HUMAN	WDR44	WD repeat-containing protein 44	18.3263	16.0923	16.7973	14.5787	15.0165	14.7114
+	3.67657	-0.586341	Q5JSZ5	Q5JSZ5;Q5JSZ5-5;A0A804HKL6	PRC2B_HUMAN	PRRC2B	Protein PRRC2B	22.8604	22.7922	22.8086	23.437	23.457	23.3262
+	4.88078	-0.854536	Q5JTH9	Q5JTH9;Q5JTH9-2;Q5JTH9-3	RRP12_HUMAN	RRP12	RRP12-like protein	23.5391	23.6009	23.6229	24.4114	24.4317	24.4834
+	4.43209	-2.48595	Q5R372;Q5R372-2;Q5R372-3;Q5R372-4	Q5R372;A0A0U1RQY6;Q5R372-2;Q5R372-3;Q5R372-4;A0A804HKD7;A0A0C4DG54	RBG1L_HUMAN	RABGAP1L	Rab GTPase-activating protein 1-like	14.5739	14.8397	14.767	17.057	17.1941	17.3873
+	3.05533	0.373869	Q5TB30	Q5TB30;H0YES2;Q5TB30-2	DEP1A_HUMAN	DEPDC1	DEP domain-containing protein 1A	20.2506	20.2357	20.3657	19.9161	19.9215	19.8928
+	1.66504	2.66348	Q5U623;Q5U623-2	Q5U623;H3BPC9;Q5U623-2;F5GY73	MCAF2_HUMAN	ATF7IP2	Activating transcription factor 7-interacting protein 2	21.4216	20.6307	20.4461	16.8656	19.0392	18.6031
+	1.72538	1.09619	Q5VTR2	Q5VTR2;C9J0A5;C9JXC9	BRE1A_HUMAN	RNF20	E3 ubiquitin-protein ligase BRE1A	18.6911	18.175	18.1098	17.5928	16.8311	17.2635
+	3.3261	-0.561851	Q68CQ4	Q68CQ4	UTP25_HUMAN	UTP25	U3 small nucleolar RNA-associated protein 25 homolog	21.0504	20.8853	20.9881	21.5027	21.5824	21.5242
+	3.78187	-0.495167	Q6IE81;Q6IE81-2	Q6IE81;Q6IE81-3;Q6IE81-2	JADE1_HUMAN	JADE1	Protein Jade-1	18.9449	18.9013	18.9729	19.4191	19.3934	19.4921
+	3.58191	-0.65617	Q6NYC1;Q6NYC1-2;Q6NYC1-3	Q6NYC1;B2WTI3;B2WTI4;Q6NYC1-2;Q6NYC1-3;K7EJU9	JMJD6_HUMAN	JMJD6	Bifunctional arginine demethylase and lysyl-hydroxylase JMJD6	20.2738	20.1526	20.1983	20.795	20.8621	20.9361
+	3.82033	-0.335465	Q6P158	Q6P158;H7C109	DHX57_HUMAN	DHX57	Putative ATP-dependent RNA helicase DHX57	24.34	24.3015	24.2675	24.6424	24.6564	24.6165
+	3.28077	0.521824	Q6P5R6	Q6P5R6;C9JYQ9;H0Y8C2	RL22L_HUMAN	RPL22L1	60S ribosomal protein L22-like 1	24.6283	24.5509	24.5844	23.9739	24.1128	24.1115
+	2.60083	0.495079	Q6PIY7;Q6PIY7-2	Q6PIY7;D6RAF2;Q6PIY7-2	GLD2_HUMAN	TENT2	Poly(A) RNA polymerase GLD2	19.7152	19.5982	19.8219	19.2675	19.2321	19.1505
+	1.34426	-2.58148	Q6WKZ4;Q6WKZ4-3	Q6WKZ4;Q6WKZ4-3;Q6WKZ4-5	RFIP1_HUMAN	RAB11FIP1	Rab11 family-interacting protein 1	14.2665	15.2125	17.262	17.85	18.3616	18.2739
+	4.37309	-1.03938	Q7KZ85	Q7KZ85;Q7KZ85-2	SPT6H_HUMAN	SUPT6H	Transcription elongation factor SPT6	21.0144	20.9663	21.0728	21.9799	22.1328	22.0589
+	3.86888	-0.619321	Q7L2H7	Q7L2H7;J3KNJ2;E9PN86	EIF3M_HUMAN	EIF3M	Eukaryotic translation initiation factor 3 subunit M	23.9866	24.0748	23.9436	24.6531	24.5876	24.6222
+	4.52232	-1.73665	Q7Z4V5	Q7Z4V5;Q9Y3E1;Q7Z4V5-2;Q7Z4V5-3;Q7Z4V5-4;M0R0J3	HDGR2_HUMAN	HDGFL2	Hepatoma-derived growth factor-related protein 2	23.0141	22.8752	23.0565	24.8166	24.7344	24.6048
+	3.90982	0.361118	Q7Z739	Q7Z739;S4R373	YTHD3_HUMAN	YTHDF3	YTH domain-containing family protein 3	21.3812	21.3367	21.3999	21.001	21.0424	20.991
+	3.31228	0.403191	Q7Z7K6	Q7Z7K6;Q7Z7K6-3;A0A0M3HER2	CENPV_HUMAN	CENPV	Centromere protein V	21.4514	21.3689	21.4343	20.9558	21.0466	21.0427
+	2.19984	0.85151	Q86TU7	Q86TU7	SETD3_HUMAN	SETD3	Actin-histidine N-methyltransferase	18.0042	17.839	17.4756	16.8423	16.9262	16.9958
+	2.66176	-0.830699	Q86V97	Q86V97;Q8WVZ9	KBTB6_HUMAN	KBTBD6	Kelch repeat and BTB domain-containing protein 6	18.0399	17.9312	18.286	19.0219	18.8901	18.8371
+	2.47605	-0.921035	Q86W34	Q86W34;J3KRD0;J3KS38;J3KRS2;J3KSH1;J3KTM1;J3QLK6	AMZ2_HUMAN	AMZ2	Archaemetzincin-2	21.2361	21.5179	21.2879	22.4847	22.0733	22.2472
+	1.51284	-1.39913	Q86X53	Q86X53;H0YBT6;H0YB25;E5RHA3	ERIC1_HUMAN	ERICH1	Glutamate-rich protein 1	15.4364	15.4088	16.095	16.5401	16.8454	17.752
+	1.6733	1.99811	Q86Y97	Q86Y97;A0A0D9SF94	KMT5C_HUMAN	KMT5C	Histone-lysine N-methyltransferase KMT5C	17.5546	17.9956	17.8223	16.8377	15.3984	15.142
+	2.08663	0.741141	Q8N0T1	Q8N0T1	RBIS_HUMAN	RBIS	Ribosomal biogenesis factor	19.7966	19.5532	19.4883	19.0783	18.8725	18.6639
+	2.66189	-0.487902	Q8N1G4	Q8N1G4	LRC47_HUMAN	LRRC47	Leucine-rich repeat-containing protein 47	20.8787	20.7362	20.9339	21.3231	21.4077	21.2818
+	5.03545	-0.757989	Q8N3C0	Q8N3C0	ASCC3_HUMAN	ASCC3	Activating signal cointegrator 1 complex subunit 3	24.0062	24.0021	23.961	24.7167	24.7351	24.7915
+	2.20427	-2.03641	Q8N5C7	Q8N5C7;H0YMP4;H0YML0;H0YL61;H0YK73;Q8N5C7-3	DTWD1_HUMAN	DTWD1	tRNA-uridine aminocarboxypropyltransferase 1	16.4132	17.5465	16.4332	19.0095	18.6717	18.8209
+	2.53552	-1.59881	Q8N6C5;Q8N6C5-2;Q8N6C5-4	Q8N6C5;Q8N6C5-2;Q8N6C5-4;A0A494C0W8;A0A494C0K8	IGSF1_HUMAN	IGSF1	Immunoglobulin superfamily member 1	21.3202	22.0308	21.8375	23.5765	23.2379	23.1706
+	2.50646	-2.1431	Q8N6M0	Q8N6M0;A0A0C4DH76;A0A087X0W9	OTU6B_HUMAN	OTUD6B	Deubiquitinase OTUD6B	14.5884	15.3081	14.6667	17.2828	17.205	16.5046
+	3.35063	0.554821	Q8N726	Q8N726	ARF_HUMAN	CDKN2A	Isoform of P42771, Tumor suppressor ARF	20.7527	20.7266	20.6755	20.0693	20.2093	20.2118
+	2.03743	0.609081	Q8N8U2	Q8N8U2;A0A0B4J291	CDYL2_HUMAN	CDYL2	Chromodomain Y-like protein 2	18.3923	18.2341	18.2617	17.4546	17.8516	17.7546
+	3.95266	-0.754257	Q8N9N2-2	Q8N9N2;H0YER2;H0YE76;H0YCB3;A0A5F9ZH79;A0A5F9ZHP1;Q8N9N2-2	ASCC1_HUMAN	ASCC1	Isoform of Q8N9N2, Isoform 2 of Activating signal cointegrator 1 complex subunit 1	22.4841	22.4046	22.3752	23.2053	23.221	23.1005
+	2.16979	-1.28418	Q8N9N8	Q8N9N8;E9PS30;E9PS76;E9PQD0;E9PLI6	EIF1A_HUMAN	EIF1AD	Probable RNA-binding protein EIF1AD	17.5421	17.3215	17.1065	19.0387	18.3883	18.3957
+	1.44942	-1.53492	Q8NBS9	Q8NBS9	TXND5_HUMAN	TXNDC5	Thioredoxin domain-containing protein 5	15.3897	16.4374	14.9335	17.176	17.4543	16.7351
+	2.76572	0.376281	Q8NDV7-6	Q8NDV7;H3BRT3;Q8NDV7-2;Q8NDV7-5;Q8NDV7-6;H7C269	TNR6A_HUMAN	TNRC6A	Isoform of Q8NDV7, Isoform 6 of Trinucleotide repeat-containing gene 6A protein	21.4831	21.4087	21.3552	21.0448	21.0954	20.9778
+	2.17805	-1.69955	Q8NHZ8	Q8NHZ8	CDC26_HUMAN	CDC26	Anaphase-promoting complex subunit CDC26	18.2574	17.2493	17.3464	19.2529	19.2427	19.4561
+	2.26866	-1.79226	Q8TEU7;Q8TEU7-4	Q8TEU7;D6RE77;B7Z7Y1;Q8TEU7-3;Q8TEU7-4;Q8TEU7-5;Q8TEU7-2;A0A5F9ZHG7;E9PCH4	RPGF6_HUMAN	RAPGEF6	Rap guanine nucleotide exchange factor 6	15.3438	16.1281	15.1979	17.0829	17.6127	17.351
+	2.05255	4.66277	Q8WWL2;Q8WWL2-2	Q8WWL2;Q8WWL2-2;Q8WWL2-3;Q8WWL2-4	SPIR2_HUMAN	SPIRE2	Protein spire homolog 2	20.9842	20.4026	21.042	15.4896	18.0315	14.9194
+	2.93315	0.368464	Q8WWQ0	Q8WWQ0;Q9NSI6;Q9NSI6-2;Q9NSI6-3;H7BZR9;H7C409;A0A8V8TQM4;A0A8V8TQZ3;A0A8V8TPK0;A0A8V8TPV5	PHIP_HUMAN	PHIP	PH-interacting protein	21.7824	21.6949	21.7031	21.3471	21.4233	21.3046
+	1.64303	-1.56161	Q8WXE9;Q8WXE9-3	Q8WXE9;Q8WXE9-3;H0YJ05;A0A3B3IU55	STON2_HUMAN	STON2	Stonin-2	17.5558	18.4188	18.9429	19.5854	19.8898	20.1271
+	2.8029	2.54754	Q8WYQ5;Q8WYQ5-3	Q8WYQ5;Q8WYQ5-2;Q8WYQ5-3	DGCR8_HUMAN	DGCR8	Microprocessor complex subunit DGCR8	18	17.9767	18.0201	16.0433	15.4201	14.8907
+	2.26103	-0.497698	Q92541	Q92541	RTF1_HUMAN	RTF1	RNA polymerase-associated protein RTF1 homolog	21.7752	21.513	21.7621	22.2245	22.2008	22.118
+	3.68797	-1.81722	Q92665	Q92665	RT31_HUMAN	MRPS31	28S ribosomal protein S31, mitochondrial	17.5085	17.4187	17.6935	19.2364	19.5866	19.2493
+	4.70747	-1.7599	Q92688;Q92688-2	Q92688;Q92688-2	AN32B_HUMAN	ANP32B	Acidic leucine-rich nuclear phosphoprotein 32 family member B	20.9577	21.1167	21.0386	22.7421	22.7345	22.9163
+	3.30368	0.394823	Q92804;Q92804-2	Q92804;Q92804-2;A0A0J9YYE0	RBP56_HUMAN	TAF15	TATA-binding protein-associated factor 2N	22.348	22.2522	22.2243	21.8712	21.8733	21.8955
+	2.34257	0.560842	Q96BN2	Q96BN2	TADA1_HUMAN	TADA1	Transcriptional adapter 1	18.634	18.5685	18.8737	18.1906	18.1117	18.0913
+	3.29475	-3.93074	Q96BP2	Q96BP2	CHCH1_HUMAN	CHCHD1	Coiled-coil-helix-coiled-coil-helix domain-containing protein 1	14.5015	15.3774	14.1016	18.6856	18.6282	18.459
+	1.73282	-2.17324	Q96BY7	Q96BY7	ATG2B_HUMAN	ATG2B	Autophagy-related protein 2 homolog B	15.7901	15.7709	17.4462	18.5168	18.6978	18.3123
+	2.12949	-1.69106	Q96DE5	Q96DE5;A0A087WUN5	APC16_HUMAN	ANAPC16	Anaphase-promoting complex subunit 16	16.7657	17.0021	17.3366	18.4681	18.3972	19.3122
+	3.07637	-0.554004	Q96DX4	Q96DX4	RSPRY_HUMAN	RSPRY1	RING finger and SPRY domain-containing protein 1	20.0636	20.2036	20.0301	20.6455	20.71	20.6038
+	4.62569	-2.90257	Q96DX7	Q96DX7	TRI44_HUMAN	TRIM44	Tripartite motif-containing protein 44	17.4531	17.5389	17.4	20.5939	20.3358	20.17
+	2.39037	-8.51518	Q96EV2	Q96EV2;H0Y3K4	RBM33_HUMAN	RBM33	RNA-binding protein 33	18.683	14.2592	14.4907	24.3509	24.3029	24.3246
+	3.26997	-1.12277	Q96EY7	Q96EY7;Q96EY7-2	PTCD3_HUMAN	PTCD3	Pentatricopeptide repeat domain-containing protein 3, mitochondrial	18.9196	19.1975	19.2731	20.2955	20.2622	20.2008
+	1.44114	1.92873	Q96F86	Q96F86;H3BSQ0;H3BPN4	EDC3_HUMAN	EDC3	Enhancer of mRNA-decapping protein 3	17.9486	17.0329	18.4375	14.9769	16.1177	16.5382
+	4.43038	-1.1483	Q96GA3	Q96GA3	LTV1_HUMAN	LTV1	Protein LTV1 homolog	24.2904	24.1802	24.2327	25.3905	25.4616	25.2961
+	4.0491	0.329943	Q96GD4;Q96GD4-5	Q96GD4;J3KRF8;J3KRJ2;J3KTD6;Q96GD4-2;Q96GD4-3;Q96GD4-4;Q96GD4-5;J3QLN8;J3QR41	AURKB_HUMAN	AURKB	Aurora kinase B	21.3128	21.3133	21.2966	21.0148	20.9712	20.9469
+	2.06692	-2.57582	Q96I59	Q96I59;E9PRK2;A0A8Q3WLT2;A0A8Q3WKD4;A0A8Q3WKD9;A0A8Q3WKE5;A0A8Q3WKF4;A0A8Q3WKI6;A0A8Q3WLI0;A0A8Q3SIK4;A0A8Q3SHT7;A0A8Q3SHU1;A0A8Q3SHS9;A0A8Q3SHT5;A0A8Q3SHV4;A0A8Q3SHL5;A0A8Q3SHN4;A0A8Q3SHP1	SYNM_HUMAN	NARS2	Probable asparagine--tRNA ligase, mitochondrial	16.0639	14.5303	14.523	17.5416	17.391	17.912
+	2.49822	-0.461682	Q96IV0;Q96IV0-2;Q96IV0-3;Q96IV0-5	Q96IV0;A0A6Q8PF23;A0A6Q8PHJ3;Q96IV0-5;Q96IV0-2;Q96IV0-3;A0A0C4DFP4	NGLY1_HUMAN	NGLY1	Peptide-N(4)-(N-acetyl-beta-glucosaminyl)asparagine amidase	21.3904	21.4373	21.5125	21.8301	22.0343	21.8608
+	2.75643	-1.78419	Q96JG9	Q96JG9;H3BS19	ZN469_HUMAN	ZNF469	Zinc finger protein 469	19.8112	20.3963	20.5184	21.9454	22.2254	21.9077
+	3.44055	-0.522742	Q96MU7;Q96MU7-2	Q96MU7;Q96MU7-2;J3QR07	YTDC1_HUMAN	YTHDC1	YTH domain-containing protein 1	21.1884	21.089	21.0318	21.6222	21.6434	21.6118
+	4.96267	-1.47639	Q96ST2	Q96ST2;Q96ST2-2;Q96ST2-3;A0A1B0GW95;H7C0U1	IWS1_HUMAN	IWS1	Protein IWS1 homolog	24.1579	24.0042	24.0875	25.559	25.614	25.5057
+	1.75062	-1.28725	Q96TA1;Q96TA1-2	Q96TA1;Q96TA1-2	NIBA2_HUMAN	NIBAN2	Protein Niban 2	17.5285	18.2591	17.8509	19.6729	18.8578	18.9697
+	2.73187	3.20931	Q99439	Q99439;H3BVI6;B4DUT8;H3BQH0;B4DDF4;Q99439-2;K7ES69;A0A087X1X5;A0A087X271;A0A087WV51	CNN2_HUMAN	CNN2	Calponin-2	18.4968	18.5188	18.141	15.5566	15.6367	14.3354
+	5.36679	-0.584146	Q99613	Q99613;B5ME19;Q99613-2;H3BPE3	EIF3C_HUMAN	EIF3C	Eukaryotic translation initiation factor 3 subunit C	26.5267	26.522	26.5087	27.0774	27.133	27.0995
+	3.15049	0.472553	Q9BPW8	Q9BPW8;C9JDV8;H7C2U6	NIPS1_HUMAN	NIPSNAP1	Protein NipSnap homolog 1	20.1479	20.2405	20.1249	19.6521	19.7685	19.6751
+	4.47455	-0.610587	Q9BQA1	Q9BQA1;Q9BQA1-2	MEP50_HUMAN	WDR77	Methylosome protein 50	24.6599	24.5815	24.6747	25.2595	25.2532	25.2352
+	2.02801	0.881678	Q9BRR8	Q9BRR8	GPTC1_HUMAN	GPATCH1	G patch domain-containing protein 1	17.8702	17.4018	17.3035	16.7628	16.5235	16.6442
+	4.6195	-0.92605	Q9BRS2	Q9BRS2;E9PFQ8	RIOK1_HUMAN	RIOK1	Serine/threonine-protein kinase RIO1	24.1168	23.9885	24.0732	25.0059	25	24.9506
+	1.89154	-1.08939	Q9BTT0	Q9BTT0;Q5TB19;Q9BTT0-3;E9PLC4	AN32E_HUMAN	ANP32E	Acidic leucine-rich nuclear phosphoprotein 32 family member E	18.9876	19.1035	18.735	20.1599	20.3498	19.5846
+	6.257	-1.14658	Q9BVS4	Q9BVS4;Q9BVS4-2;H0Y8R4;H0Y919	RIOK2_HUMAN	RIOK2	Serine/threonine-protein kinase RIO2	22.0212	21.9705	21.994	23.1259	23.1689	23.1306
+	1.77952	2.20155	Q9BWT7	Q9BWT7	CAR10_HUMAN	CARD10	Caspase recruitment domain-containing protein 10	18.0646	17.9375	17.5468	14.6119	16.3832	15.9491
+	1.77255	0.703913	Q9BXX2	Q9BXX2;Q9BXX2-2;A0A590UK20;A0A8I5KW82	AN30B_HUMAN	ANKRD30B	Ankyrin repeat domain-containing protein 30B	20.8212	20.2827	20.6286	19.9893	19.9206	19.7108
+	1.74072	-0.720413	Q9BYC9	Q9BYC9;Q9BYC9-2;I3L2X1	RM20_HUMAN	MRPL20	39S ribosomal protein L20, mitochondrial	15.9689	16.2799	16.1957	16.9375	16.56	17.1083
+	3.13588	-0.531975	Q9H1A4	Q9H1A4;A0A2R8YF63;H0Y564	APC1_HUMAN	ANAPC1	Anaphase-promoting complex subunit 1	20.0279	19.9346	19.9319	20.4972	20.5786	20.4144
+	4.3227	-0.810081	Q9H1I8	Q9H1I8;B1AH59	ASCC2_HUMAN	ASCC2	Activating signal cointegrator 1 complex subunit 2	23.2122	23.2559	23.2928	23.9947	24.0783	24.1182
+	1.8601	-1.0409	Q9H3C7	Q9H3C7	GGNB2_HUMAN	GGNBP2	Gametogenetin-binding protein 2	18.799	18.0651	18.045	19.3236	19.3406	19.3676
+	1.37913	2.72682	Q9H3M7-2	Q9H3M7-2	TXNIP_HUMAN	TXNIP	Isoform of Q9H3M7, Isoform 2 of Thioredoxin-interacting protein	18.0974	18.6271	16.6867	13.6852	16.0832	15.4623
+	1.89766	0.805707	Q9H4F8;Q9H4F8-2	Q9H4F8;Q9H4F8-2	SMOC1_HUMAN	SMOC1	SPARC-related modular calcium-binding protein 1	17.0107	17.1686	17.179	16.66	16.0595	16.2217
+	4.21554	-0.635291	Q9H501	Q9H501;A0A087WX71	ESF1_HUMAN	ESF1	ESF1 homolog	19.1256	19.1709	19.1694	19.7423	19.8533	19.7762
+	3.12539	3.4688	Q9H773	Q9H773	DCTP1_HUMAN	DCTPP1	dCTP pyrophosphatase 1	18.8244	17.846	18.1295	14.5777	15.2673	14.5486
+	3.4	0.328458	Q9H869-3	Q3T8J9;Q9H869;Q3T8J9-2;Q3T8J9-3;A0A087WUE6;Q9H869-2;Q9H869-3;Q9H869-4;Q9H869-5;Q9H869-6;Q9H869-7;Q9H869-8;Q9H869-9	YYAP1_HUMAN	YY1AP1	Isoform of Q9H869, Isoform 3 of YY1-associated protein 1	21.2069	21.1211	21.1732	20.8665	20.8086	20.8407
+	2.23119	0.680221	Q9H981	Q9H981;Q9H981-2;Q9H981-3;H0Y849	ARP8_HUMAN	ACTR8	Actin-related protein 8	17.2254	16.88	17.0005	16.3066	16.5056	16.2531
+	1.53952	1.92924	Q9HCL3	Q9HCL3;P17039;Q9Y2G7;Q8N141;Q8TAF7;P17039-2;B4DRP8;A0A087WVP9;Q8TAF7-2	ZFP14_HUMAN	ZFP14	Zinc finger protein 14 homolog	16.5174	17.6377	17.801	14.9318	16.2153	15.0214
+	3.60352	-0.501919	Q9HD67	Q9HD67;Q9HD67-3;A0A0A0MQX1;E9PEW5	MYO10_HUMAN	MYO10	Unconventional myosin-X	18.8932	18.959	18.9836	19.4686	19.4859	19.387
+	1.74553	0.783342	Q9NQG5	Q9NQG5;A2A2M0;A0A087X2D2;A0A087WUK3	RPR1B_HUMAN	RPRD1B	Regulation of nuclear pre-mRNA domain-containing protein 1B	18.9355	19.0843	18.6429	18.4017	17.8781	18.0328
+	4.14906	-1.06894	Q9NRM2	Q9NRM2;C9J3B6;F8WBE4;C9JH62;G5E9M4	ZN277_HUMAN	ZNF277	Zinc finger protein 277	21.5444	21.5535	21.3789	22.5924	22.5064	22.5848
+	4.34312	-1.18298	Q9NRX1	Q9NRX1	PNO1_HUMAN	PNO1	RNA-binding protein PNO1	23.9888	24.166	24.0847	25.2016	25.2624	25.3245
+	3.05327	-0.565526	Q9NS91	Q9NS91;F8WE49	RAD18_HUMAN	RAD18	E3 ubiquitin-protein ligase RAD18	19.466	19.545	19.5757	20.086	20.1929	20.0044
+	1.9818	0.864673	Q9NX09	Q9NX09;A0A7P0Z4M7	DDIT4_HUMAN	DDIT4	DNA damage-inducible transcript 4 protein	16.384	16.4837	16.2296	15.6937	15.6582	15.1514
+	3.07614	0.372323	Q9NX55	Q9NX55;Q9NX55-3;J3QT56	HYPK_HUMAN	HYPK	Huntingtin-interacting protein K	20.3878	20.5031	20.4049	20.0982	20.0289	20.0516
+	3.32472	0.469022	Q9NXW2	Q9NXW2;J3KPS0;Q9NXW2-2;V9GYN7;V9GY70	DJB12_HUMAN	DNAJB12	DnaJ homolog subfamily B member 12	18.3607	18.3571	18.3426	17.9425	17.9139	17.7969
+	3.41381	0.405165	Q9NYH9	Q9NYH9	UTP6_HUMAN	UTP6	U3 small nucleolar RNA-associated protein 6 homolog	18.3452	18.3445	18.2797	17.9668	17.9229	17.8643
+	4.21287	0.442278	Q9NYL2	Q9NYL2	M3K20_HUMAN	MAP3K20	Mitogen-activated protein kinase kinase kinase 20	22.2678	22.2637	22.1956	21.8075	21.8108	21.7819
+	2.97133	0.374434	Q9NZI8	Q9NZI8	IF2B1_HUMAN	IGF2BP1	Insulin-like growth factor 2 mRNA-binding protein 1	24.1036	24.0065	24.0475	23.7326	23.6864	23.6153
+	2.31985	-0.653512	Q9P2K8;Q9P2K8-2	Q9P2K8;H0YME5;Q9P2K8-2	E2AK4_HUMAN	EIF2AK4	eIF-2-alpha kinase GCN2	18.7585	18.7733	19.1002	19.5795	19.4775	19.5356
+	3.22738	-0.567958	Q9UBQ5	Q9UBQ5;K7ES31;K7ERF1;Q9UBQ5-2	EIF3K_HUMAN	EIF3K	Eukaryotic translation initiation factor 3 subunit K	26.241	26.1467	26.3303	26.8333	26.8261	26.7624
+	3.44451	-0.850077	Q9UHB7	Q9UHB7;C9JCE0;Q9UHB7-2;Q9UHB7-3	AFF4_HUMAN	AFF4	AF4/FMR2 family member 4	19.5478	19.2898	19.4596	20.2822	20.287	20.2781
+	3.05085	-0.670131	Q9UHR5;Q9UHR5-2	Q9UHR5;Q9UHR5-2;J3QQJ0	S30BP_HUMAN	SAP30BP	SAP30-binding protein	20.7231	20.8729	20.6459	21.4883	21.3793	21.3847
+	1.5482	-1.56775	Q9UHW5;Q9UHW5-2	Q9UHW5;Q9UHW5-2;S4R3M7	GPN3_HUMAN	GPN3	GPN-loop GTPase 3	15.279	15.6562	16.7869	17.5667	17.6056	17.2532
+	1.48006	-2.28796	Q9UIF8;Q9UIF8-2;Q9UIF8-3;Q9UIF8-4;Q9UIF8-5	Q9UIF8;Q9UIF8-2;Q9UIF8-4;Q9UIF8-5;Q9UIF8-3	BAZ2B_HUMAN	BAZ2B	Bromodomain adjacent to zinc finger domain protein 2B	14.9911	17.278	16.5399	18.382	19.0386	18.2524
+	3.77878	-0.624354	Q9UJX2	Q9UJX2;Q9UJX2-3	CDC23_HUMAN	CDC23	Cell division cycle protein 23 homolog	19.1504	19.1173	19.244	19.786	19.8429	19.7559
+	5.13415	-0.659412	Q9UJX3;Q9UJX3-2	Q9UJX3;Q9UJX3-2	APC7_HUMAN	ANAPC7	Anaphase-promoting complex subunit 7	20.1835	20.1477	20.1946	20.804	20.8619	20.8382
+	2.94612	-0.736586	Q9UJX4	Q9UJX4;H0YFB5;Q9UJX4-3;F5H0F9;F5H0N1	APC5_HUMAN	ANAPC5	Anaphase-promoting complex subunit 5	18.5829	18.3023	18.3507	19.1149	19.1561	19.1746
+	3.15311	-1.01503	Q9UJX5;Q9UJX5-3	Q9UJX5;Q9UJX5-2;Q9UJX5-3	APC4_HUMAN	ANAPC4	Anaphase-promoting complex subunit 4	18.5326	18.773	18.8989	19.7498	19.758	19.7417
+	2.67928	-3.70339	Q9UKM7	Q9UKM7;H0YI64;H0YGV7;H0YGQ1;H0YG20;A0A804HHU1;A0A804HJ23;A0A804HJ66;A0A804HK01;A0A804HK86;A0A804HL61;A0A804HL65;A0A804HKS1	MA1B1_HUMAN	MAN1B1	Endoplasmic reticulum mannosyl-oligosaccharide 1,2-alpha-mannosidase	16.2269	14.6031	16.0639	19.2975	19.4898	19.2168
+	3.07674	-0.526622	Q9UKM9;Q9UKM9-2	Q9UKM9;Q9UKM9-2;Q5QPL9;Q5QPM0;Q5QPM1	RALY_HUMAN	RALY	RNA-binding protein Raly	22.6083	22.5513	22.6313	23.1283	23.2135	23.0289
+	2.71543	-1.02218	Q9UL62	Q9UL62;Q9UBN4;Q9UBN4-2;Q9UBN4-3;Q9UBN4-4;Q9UBN4-5;Q9UBN4-6	TRPC5_HUMAN	TRPC5	Short transient receptor potential channel 5	20.9303	21.319	21.2947	22.3302	22.1242	22.1561
+	1.97565	1.51489	Q9ULR0-1	Q9ULR0;Q9ULR0-1;Q9ULR0-2	ISY1_HUMAN	ISY1	Isoform of Q9ULR0, Isoform 2 of Pre-mRNA-splicing factor ISY1 homolog	20.5002	20.5358	20.9506	19.0595	18.6745	19.708
+	5.00734	-1.0237	Q9ULX3	Q9ULX3	NOB1_HUMAN	NOB1	RNA-binding protein NOB1	23.5907	23.5194	23.5701	24.5372	24.6397	24.5744
+	1.69682	-2.26734	Q9UPW5;Q9UPW5-2;Q9UPW5-3	Q9UPW5;J3KNS1;Q9UPW5-2;Q9UPW5-3	CBPC1_HUMAN	AGTPBP1	Cytosolic carboxypeptidase 1	16.5259	15.1564	14.4743	17.6809	17.7366	17.5411
+	3.10877	-0.556841	Q9Y262	Q9Y262;B0QY89;B0QY90;Q9Y262-2	EIF3L_HUMAN	EIF3L	Eukaryotic translation initiation factor 3 subunit L	25.7397	25.8164	25.8003	26.2905	26.454	26.2824
+	2.44653	-2.72665	Q9Y291	Q9Y291;C9JBY7	RT33_HUMAN	MRPS33	28S ribosomal protein S33, mitochondrial	16.6442	16.8668	15.4388	19.0572	19.0811	18.9914
+	3.29862	-1.31347	Q9Y297;Q9Y297-2	Q9Y297;B7Z3H4;Q9Y297-2	FBW1A_HUMAN	BTRC	F-box/WD repeat-containing protein 1A	15.3206	14.9111	15.0556	16.3221	16.458	16.4476
+	2.5628	0.469255	Q9Y2G9;Q9Y2G9-3	Q9Y2G9;Q9Y2G9-3;K7ES28	SBNO2_HUMAN	SBNO2	Protein strawberry notch homolog 2	21.7829	21.6953	21.7126	21.1884	21.3926	21.202
+	3.74573	-0.483335	Q9Y2R9	Q9Y2R9;J3QKW2;J3QLS3	RT07_HUMAN	MRPS7	28S ribosomal protein S7, mitochondrial	20.5235	20.5437	20.6113	21.0075	21.0897	21.0313
+	2.86957	-0.502838	Q9Y399	Q9Y399	RT02_HUMAN	MRPS2	28S ribosomal protein S2, mitochondrial	21.3286	21.2958	21.1438	21.7069	21.8001	21.7698
+	3.37906	-0.587626	Q9Y3D9	Q9Y3D9	RT23_HUMAN	MRPS23	28S ribosomal protein S23, mitochondrial	21.1909	21.2671	21.2639	21.8432	21.9037	21.7379
+	3.32005	-1.39294	Q9Y4B6	Q9Y4B6;Q9Y4B6-2;Q9Y4B6-3	DCAF1_HUMAN	DCAF1	DDB1- and CUL4-associated factor 1	18.8173	18.8519	19.2243	20.3457	20.4138	20.3128
+	2.02898	1.57491	Q9Y4K0	Q9Y4K0;H0YAP6	LOXL2_HUMAN	LOXL2	Lysyl oxidase homolog 2	17.7731	17.5417	17.7225	15.9797	16.7244	15.6084
+	4.01217	0.316622	Q9Y5Q9	Q9Y5Q9;H7C143;A0A494C1S7	TF3C3_HUMAN	GTF3C3	General transcription factor 3C polypeptide 3	20.5015	20.4696	20.5384	20.1805	20.1936	20.1855
+	3.49286	-0.414745	Q9Y5T5-2	Q9Y5T5;Q9Y5T5-2;Q9Y5T5-3;Q9Y5T5-5	UBP16_HUMAN	USP16	Isoform of Q9Y5T5, Isoform 2 of Ubiquitin carboxyl-terminal hydrolase 16	20.1538	20.0524	20.0562	20.4764	20.5065	20.5236
+	1.54051	2.15996	Q9Y5V0	Q9Y5V0	ZN706_HUMAN	ZNF706	Zinc finger protein 706	17.9956	17.7239	18.373	16.7854	14.6923	16.1349
+	3.46223	-0.461353	Q9Y676	Q9Y676;A0A0G2JIC6	RT18B_HUMAN	MRPS18B	28S ribosomal protein S18b, mitochondrial	20.4915	20.57	20.5964	20.9635	21.0478	21.0306
	0.3237	-0.126443	A0A024R4E5;C9J5E5;C9JBS3;C9JEJ8;C9JES8;C9JHN6;C9JHS7;C9JHZ8;C9JIZ1;C9JK79;C9JT62;C9JZI8	C9J5E5;C9JZI8;C9JT62;C9JK79;C9JIZ1;C9JHS7;C9JHN6;C9JHZ8;C9JBS3;C9JEJ8;C9JES8;A0A024R4E5	A0A024R4E5_HUMAN;C9J5E5_HUMAN;C9JBS3_HUMAN;C9JEJ8_HUMAN;C9JES8_HUMAN;C9JHN6_HUMAN;C9JHS7_HUMAN;C9JHZ8_HUMAN;C9JIZ1_HUMAN;C9JK79_HUMAN;C9JT62_HUMAN;C9JZI8_HUMAN	HDLBP	Isoform of Q00341, High density lipoprotein binding protein (Vigilin), isoform CRA_a	19.4486	19.2274	19.1259	19.649	19.2989	19.2333
	0.628299	0.133628	A0A024RCL3;A0A0G2JJ55;A0A0G2JK11;Q96QC4	Q96QC4;A0A024RCL3;A0A0G2JK11;A0A0G2JJ55	A0A024RCL3_HUMAN;A0A0G2JJ55_HUMAN;A0A0G2JK11_HUMAN;Q96QC4_HUMAN	MICA	Isoform of Q29983, MHC class I polypeptide-related sequence A	21.3737	21.283	21.2107	21.3215	21.0594	21.0857
	0.73314	0.502783	A0A087WZ13;E9PAU2	E9PAU2;A0A087WZ13	A0A087WZ13_HUMAN;E9PAU2_HUMAN	RAVER1	Isoform of Q8IY67, Ribonucleoprotein PTB-binding 1	16.8667	17.9322	17.2736	16.8902	16.916	16.7579
	0.606079	1.33208	A0A096LP01	A0A096LP01;A0A096LPB2;A0A096LPB8;A0A087WZV9	SIM26_HUMAN	SMIM26	Small integral membrane protein 26	16.9476	17.05	17.3058	17.1809	16.2389	13.8874
	0.35674	-0.329951	A0A0A0MSA7;A0A804HJV5	A0A0A0MSA7;A0A804HJV5	A0A0A0MSA7_HUMAN;A0A804HJV5_HUMAN	EIF4G3	Isoform of O43432, Eukaryotic translation initiation factor 4 gamma 3	16.1719	16.9823	17.3829	16.9211	17.1781	17.4278
	1.15852	-0.574207	A0A0B4J1Y8	A0A0B4J1Y8	LV949_HUMAN	IGLV9-49	Immunoglobulin lambda variable 9-49	18.3842	18.9915	18.4509	19.3225	18.9198	19.307
	0.747832	-2.29148	A0A0B4J2B4	P62841;K7EJ78;S4R417;A0A0B4J2B4;S4R456;K7ELC2;K7EM56;K7EQJ5	A0A0B4J2B4_HUMAN	RPS15	Isoform of P62841, 40S ribosomal protein S15	15.1752	19.4155	19.2741	20.6755	20.0122	20.0517
	0.373385	0.965108	A0A0B4J2F2	P57059;A0A0B4J2F2;A0A2R8Y6E4	SIK1B_HUMAN	SIK1B	Putative serine/threonine-protein kinase SIK1B	17.0712	17.9782	17.2815	14.3828	17.5124	17.5403
	0.258952	0.126326	A0A0C4DG89	A0A0C4DG89	A0A0C4DG89_HUMAN	DDX46	Isoform of Q7L014, RNA helicase	20.2844	19.9661	19.8629	19.8167	20.2001	19.7178
	0.370431	1.14733	A0A0D9SEX9	A0A0D9SEX9	A0A0D9SEX9_HUMAN	GLIS1	Isoform of Q8NBF1, Zinc finger protein GLIS1	18.1783	18.1556	18.3206	18.2403	18.4882	14.484
	0.00910847	-0.0114574	A0A0G2JQT1;A0A0G2JR96	A0A0G2JR96;A0A0G2JQT1	A0A0G2JQT1_HUMAN;A0A0G2JR96_HUMAN	CYFIP1	Isoform of Q7L576, Cytoplasmic FMR1-interacting protein 1 (Fragment)	16.8158	16.833	16.9351	16.0498	17.2399	17.3285
	0.0140955	-0.0052681	A0A0U1RQK7;A0A8I5KV92	A0A8I5QKZ5;A0A0U1RQK7;A0A8I5KV92	A0A0U1RQK7_HUMAN;A0A8I5KV92_HUMAN	EIF4G3	Isoform of O43432, Eukaryotic translation initiation factor 4 gamma 3	18.9881	18.8371	18.6483	18.7148	18.8037	18.9708
	0.597648	0.131409	A0A1B0GV68	A0A1B0GV68	A0A1B0GV68_HUMAN	FARP1	Isoform of Q9Y4F1, FERM, ARHGEF and pleckstrin domain-containing protein 1	18.4495	18.6652	18.4101	18.3342	18.492	18.3043
	0.922096	-0.104431	A0A1B0GVL4	P78312;E7EUR8;A0A1B0GVL4;P78312-2;P78312-4;P78312-5;P78312-6	A0A1B0GVL4_HUMAN	FAM193A	Isoform of P78312, Protein FAM193A	20.4403	20.3927	20.3605	20.432	20.4819	20.5929
	0.746118	-0.247192	A0A1W2PS58	A0A1W2PS58;K7EPI4	A0A1W2PS58_HUMAN	GFAP	Isoform of P14136, Glial fibrillary acidic protein (Fragment)	18.8337	19.0406	18.8161	18.9485	19.0833	19.4003
	0.0236854	-0.00729116	A0A2P0CTR9	A0A2P0CTR9	A0A2P0CTR9_HUMAN	C8orf34	Isoform of Q49A92, Uncharacterized protein C8orf34	19.2163	19.0125	19.0824	19.0053	19.0514	19.2765
	0.143442	-0.0836805	A0A2R8Y424	A0A2R8Y424	A0A2R8Y424_HUMAN	PRRC2C	Isoform of Q9Y520, Protein PRRC2C (Fragment)	19.8215	20.0571	20.3984	19.9064	20.3544	20.2672
	2.08427	0.370882	A0A2R8Y5A6;A0A2R8YDM9;A0A2R8YGV1	A0A2R8Y5A6;A0A2R8YGV1;A0A2R8YDM9	A0A2R8Y5A6_HUMAN;A0A2R8YDM9_HUMAN;A0A2R8YGV1_HUMAN	ATXN2	Isoform of Q99700, Ataxin-2	21.2211	21.0002	21.0369	20.7802	20.6981	20.6672
	0.191161	-0.133603	A0A2R8Y619	A0A2R8Y619	H2BK1_HUMAN	H2BK1	Histone H2B type 2-K1	20.1798	20.8498	21.0475	20.8315	20.9134	20.733
	0.229338	-0.0943553	A0A2R8Y623	A0A2R8Y623	A0A2R8Y623_HUMAN	RPS7	Isoform of P62081, 40S ribosomal protein S7 (Fragment)	18.411	18.3362	18.0148	18.1395	18.4832	18.4224
	0.493535	0.935925	A0A3B3IRW6	Q2KHR3;A0A3B3IRW6	A0A3B3IRW6_HUMAN	QSER1	Isoform of Q2KHR3, Glutamine and serine-rich protein 1	18.1749	18.6024	18.456	18.386	18.1954	15.8442
	0.989087	-0.147701	A0A3B3ISF0;A0A3B3ISF8;A0A3B3IT29	A0A3B3ISF0;A0A3B3ISF8;A0A3B3IT29	A0A3B3ISF0_HUMAN;A0A3B3ISF8_HUMAN;A0A3B3IT29_HUMAN	LARP1B	Isoform of Q659C4, La-related protein 1B	20.3529	20.3811	20.2694	20.5776	20.5016	20.3673
	0.521155	-0.100058	A0A494BZV2	H0Y7E2;H0Y2S9;A0A494BZV2	A0A494BZV2_HUMAN	MPRIP	Isoform of Q6WCQ1, Myosin phosphatase Rho-interacting protein	20.2083	20.0473	20.0657	20.2681	20.0728	20.2806
	0.260485	0.016784	A0A494C0R8;I3L2B0	A0A494C0R8;I3L2B0	A0A494C0R8_HUMAN;I3L2B0_HUMAN	CLUH	Isoform of O75153, Clustered mitochondria protein homolog	19.3568	19.3056	19.3055	19.3319	19.2685	19.3171
	0.0290704	0.0114657	A0A494C0Y9;A0A8V8TNY3	A0A8V8TNY3;A0A494C0Y9	A0A494C0Y9_HUMAN;A0A8V8TNY3_HUMAN	FAM120A	Isoform of Q9NZB2, Constitutive coactivator of PPAR-gamma-like protein 1 (Fragment)	19.3444	19.6928	19.4735	19.4571	19.6539	19.3653
	0.375621	0.116103	A0A4W8VX11;A0A5H1ZRS1;E7EV93;E9PGW9	A0A5H1ZRS1;E7EV93;A0A4W8VX11;E9PGW9	A0A4W8VX11_HUMAN;A0A5H1ZRS1_HUMAN;E7EV93_HUMAN;E9PGW9_HUMAN	PCM1	Isoform of Q15154, Pericentriolar material 1 protein	16.498	16.901	16.5998	16.5427	16.6343	16.4736
	1.10573	0.243988	A0A590UJ96	A0A590UJ96	A0A590UJ96_HUMAN	LOC122526780	Collagen alpha-1(I) chain-like	24.2413	24.239	24.1073	23.8889	23.8303	24.1365
	1.01849	0.27394	A0A5F9UQ55	A0A5F9UQ55	A0A5F9UQ55_HUMAN	FBXW4	Isoform of P57775, F-box/WD repeat-containing protein 4	20.1016	19.7739	19.9083	19.7403	19.7337	19.4879
	0.147301	0.104389	A0A6Q8PFE4;A0A804HKV3	A0A6Q8PFE4;A0A804HKV3	A0A6Q8PFE4_HUMAN;A0A804HKV3_HUMAN	ACTA1;ACTB	Isoform of P60709, Actin, cytoplasmic 1	20.9918	20.539	20.9477	20.8098	21.0525	20.3031
	0.623434	-1.79583	A0A7I2V3R0	Q9P0M6;A0A7I2YQD6;A0A7I2YQR8;A0A7I2V6E9;A0A7I2V2N7;A0A7I2V423;A0A7I2V3M7;A0A7I2V3R0;A0A7I2V3Z8;A0A7I2V412;A0A7I2V522	A0A7I2V3R0_HUMAN	MACROH2A2	Isoform of Q9P0M6, Histone H2A (Fragment)	15.0807	18.8649	18.8881	19.5619	19.7937	18.8656
	1.53751	0.129087	A0A7I2YQ88	P11940;Q4VXU2;E7ERJ7;E7EQV3;P11940-2;H0YAR2;H0YAP2;A0A6I8PLA1;A0A6I8PS38;A0A6Q8JFT6;Q4VXU2-2;A0A7I2YQ88;A0A7I2YQE4;A0A087WTT1;A0A7I2V4N4	A0A7I2YQ88_HUMAN	PABPC1	Isoform of P11940, Polyadenylate-binding protein	26.6186	26.6874	26.6611	26.5816	26.5311	26.4671
	0.262391	0.207878	A0A7P0T8N5	Q99996;A0A2R8Y590;Q99996-1;Q99996-3;Q99996-5;Q99996-6;A0A7P0T928;A0A7P0T8N5;A0A7P0T9A9;A0A7P0TAX3;A0A7P0TBH8;A0A7P0TBI4;A0A7P0TAD6;H7BYL6;A0A0A0MRF6;A0A7P0Z4N5;A0A7P0Z4Q5	A0A7P0T8N5_HUMAN	AKAP9	Isoform of Q99996, A-kinase anchor protein 9	18.4801	18.2156	18.9015	18.7825	18.2456	17.9454
	0.189035	-0.0615152	A0A804HKE7;E7EVA0	E7EVA0;B5MEG9;A0A804HKE7	A0A804HKE7_HUMAN;E7EVA0_HUMAN	MAP4	Isoform of P27816, Microtubule-associated protein	19.4645	19.4591	19.8168	19.5737	19.7075	19.6437
	1.44363	0.342176	A0A8C8KGQ8	A0A8C8KGQ8	A0A8C8KGQ8_HUMAN	UBAP2	Isoform of Q5T6F2, Ubiquitin-associated protein 2	17.5569	17.3786	17.3093	17.1174	17.1868	16.914
	0.300829	-0.0885894	A0A8C8NWT4	A1L390;A0A8C8NWT4;A0A0U1RR71;A1L390-3	A0A8C8NWT4_HUMAN	PLEKHG3	Isoform of A1L390, Pleckstrin homology domain-containing family G member 3	20.9691	20.7338	20.6573	20.9619	20.9366	20.7275
	0.404534	0.974856	A0A8I5KX72	A0A8I5KX72	A0A8I5KX72_HUMAN	NKRF	Isoform of O15226, NF-kappa-B-repressing factor	17.983	18.2242	18.3627	15.1841	18.2254	18.2359
	0.497842	0.152903	A0A8V8TMH5	Q99683;Q6ZN16;Q6ZN16-2;Q6ZN16-3;A0A8V8TMH5	A0A8V8TMH5_HUMAN	MAP3K5	Isoform of Q99683, Mitogen-activated protein kinase kinase kinase 5	19.7102	19.4343	19.2605	19.3714	19.2745	19.3005
	1.59579	0.446559	A0A8V8TMQ1;A0A8V8TNP6	A0A8V8TNP6;A0A8V8TMQ1	A0A8V8TMQ1_HUMAN;A0A8V8TNP6_HUMAN	FXR1	Isoform of P51114, Fragile X mental retardation, autosomal homolog 1, isoform CRA_d	20.7737	20.7238	20.7621	20.4142	20.4531	20.0527
	0.73455	-1.07142	A0A8V8TPV5	A0A8V8TPV5	A0A8V8TPV5_HUMAN	PHIP	Isoform of Q8WWQ0, PH-interacting protein	15.5334	17.3467	15.4753	16.6904	17.5857	17.2934
	0.0270886	0.0107212	A0A8V8TR54;H7C0J3	H7C3H7;H7C0J3;A0A8V8TR54	A0A8V8TR54_HUMAN;H7C0J3_HUMAN	CHD3	Isoform of Q12873, Chromodomain-helicase-DNA-binding protein 3	20.287	19.9709	19.8445	19.9937	20.055	20.0216
	1.40799	0.359973	A0AV96;A0AV96-2	A0AV96;D6RFL5;D6REZ6;D6RBP6;D6RBS9;D6RA49;D6R9M7;D6R9D6;B7Z8Z7;A0AV96-2	RBM47_HUMAN	RBM47	RNA-binding protein 47	19.2216	19.2145	19.5474	18.8883	19.0482	18.9671
	1.18777	0.165449	A0FGR8-2	A0FGR8;A0A499FIX8;H7BXI1;A0FGR8-2;A0FGR8-4;A0FGR8-6	ESYT2_HUMAN	ESYT2	Isoform of A0FGR8, Isoform 2 of Extended synaptotagmin-2	20.9456	20.8772	20.885	20.8482	20.7288	20.6345
	0.937158	1.58173	A0FGR8-6	H7BXI1;A0FGR8-6	ESYT2_HUMAN	ESYT2	Isoform of A0FGR8, Isoform 6 of Extended synaptotagmin-2	17.5477	17.9991	17.6683	16.8147	17.0479	14.6072
	0.0923603	0.177721	A0JLT2	A0JLT2;J3KR33	MED19_HUMAN	MED19	Mediator of RNA polymerase II transcription subunit 19	19.1899	19.3195	18.0842	17.6186	18.9113	19.5306
	1.18698	-0.30501	A1A4S6	A1A4S6	RHG10_HUMAN	ARHGAP10	Rho GTPase-activating protein 10	20.7996	20.6413	20.9216	20.9746	21.0349	21.2681
	0.419908	0.550099	A1L0T0	A1L0T0;M0R1B5;M0R026;E9PJS0	HACL2_HUMAN	ILVBL	2-hydroxyacyl-CoA lyase 2	16.7852	17.2124	17.018	15.3673	17.0428	16.9552
	0.353548	1.3731	A2RU49-2	A2RU49;A2RU49-2;A2RU49-3;A0A0C4DGM4	HYKK_HUMAN	HYKK	Isoform of A2RU49, Isoform 2 of Hydroxylysine kinase	17.7502	19.1173	18.9305	18.2948	19.2251	14.1588
	0.745562	-0.138613	A3KN83;A3KN83-2	A3KN83;A3KN83-2;A3KN83-3	SBNO1_HUMAN	SBNO1	Protein strawberry notch homolog 1	19.6007	19.5321	19.6768	19.6098	19.8673	19.7483
	0.597632	0.141919	A4D1E9	A4D1E9;A4D1E9-2	GTPBA_HUMAN	GTPBP10	GTP-binding protein 10	19.6606	19.8992	19.7725	19.6366	19.4949	19.775
	1.89257	0.163555	A5YKK6	A5YKK6;H3BR89;A5YKK6-4;A5YKK6-2;A5YKK6-3	CNOT1_HUMAN	CNOT1	CCR4-NOT transcription complex subunit 1	20.7949	20.8044	20.8446	20.6478	20.7133	20.5921
	1.73308	-0.604282	A6ND36	A6ND36	FA83G_HUMAN	FAM83G	Protein FAM83G	17.6366	17.4109	17.938	18.2656	18.3328	18.1999
	0.395721	2.24185	A6NE01	A6NE01;F5GYN0	F186A_HUMAN	FAM186A	Protein FAM186A	21.6333	22.2191	22.0998	14.968	22.1742	22.0845
	0.115973	-0.0671984	A6NGR9	A6NGR9	MROH6_HUMAN	MROH6	Maestro heat-like repeat-containing protein family member 6	20.3738	20.5458	21.0074	20.8947	20.6167	20.6172
	0.135326	-0.0824432	A6NHR9	A6NHR9;J3KTL8;A0A8I5KRS9;A6NHR9-2	SMHD1_HUMAN	SMCHD1	Structural maintenance of chromosomes flexible hinge domain-containing protein 1	18.3777	18.1312	17.8221	18.4965	18.11	17.9717
	0.884897	0.764483	A6NJ78	A6NJ78	MET15_HUMAN	METTL15	12S rRNA N4-methylcytidine (m4C) methyltransferase	16.5569	15.6541	16.1897	15.3209	15.9206	14.8657
	0.0437772	-0.0143337	A6NNL0;B1AL46;Q5VT03;Q8IVF1	Q8IVF1;A6NNL0;Q5VT03;B1AL46	NTM2A_HUMAN;NTM2B_HUMAN;NTM2D_HUMAN;NTM2E_HUMAN	NUTM2A;NUTM2B;NUTM2D;NUTM2E	NUT family member 2B	23.8364	23.671	23.88	23.6306	23.8666	23.9332
	0.400928	0.110715	A6ZKI3	Q9BWD3;Q17RB0;A6ZKI3	RTL8C_HUMAN	RTL8C	Isoform of O15255, Retrotransposon Gag-like protein 8C	19.2402	19.4989	19.3818	19.1032	19.4142	19.2713
	0.345407	1.16975	A7E2V4;A7E2V4-2;A7E2V4-3;A7E2V4-4;A7E2V4-5	A7E2V4;H7C453;S4R3H3;S4R3S6;S4R410;S4R3U7;S4R393;S4R3B3;A7E2V4-2;A7E2V4-3;A7E2V4-4;A7E2V4-5	ZSWM8_HUMAN	ZSWIM8	Zinc finger SWIM domain-containing protein 8	16.8587	17.7345	17.8145	17.5372	17.7969	13.5644
	0.489651	0.654713	A8K855	A8K855;A8K855-2	EFCB7_HUMAN	EFCAB7	EF-hand calcium-binding domain-containing protein 7	19.0296	20.6452	19.1082	18.5587	19.4112	18.849
	0.309383	0.369817	A8K8P3	A8K8P3;A8K8P3-2;A8K8P3-3;A8K8P3-5;A8K8P3-9;D3YTJ2;A8K8P3-10	SFI1_HUMAN	SFI1	Protein SFI1 homolog	18.1222	18.4903	19.595	18.0146	18.7242	18.3593
	0.0855412	-0.0332839	A8MWD9;P62308	A8MWD9;P62308;C9JVQ0;Q49AN9;F5H013	RUXGL_HUMAN;RUXG_HUMAN	SNRPG;SNRPGP15	Putative small nuclear ribonucleoprotein G-like protein 15	22.5355	22.4897	22.569	22.6485	22.2986	22.7469
	1.32708	0.333434	A9Z1Z3	A9Z1Z3	FR1L4_HUMAN	FER1L4	Fer-1-like protein 4	20.4298	20.1431	20.2603	20.1094	19.8453	19.8783
	0.877436	-0.20691	C4AMC7;Q6VEQ5	C4AMC7;A8K0Z3;Q6VEQ5;Q9NQA3;A8MWX3;A0A7I2YQU6	WASH2_HUMAN;WASH3_HUMAN	WASH2P;WASH3P	Putative WAS protein family homolog 3	18.2423	18.3503	18.5323	18.4437	18.6701	18.6318
	0.311928	0.119768	C9J6P4;H7C5K1	C9J6P4;H7C5K1	C9J6P4_HUMAN;H7C5K1_HUMAN	ZC3HAV1	Isoform of Q7Z2W4, Zinc finger CCCH-type antiviral protein 1	18.8284	18.8574	19.1028	18.6706	18.6883	19.0705
	0.577543	0.118578	C9JLW8	C9JLW8;I3L4Q0;I3L3A7;I3L317;I3L2L5	MCRI1_HUMAN	MCRIP1	Mapk-regulated corepressor-interacting protein 1	18.7562	18.6866	18.7244	18.483	18.778	18.5505
[truncated: 3,560 more rows]

## Sheet: acEF1B_EF1B
Significant	-LOG(P-value)	Difference	Protein.Group	Protein.Ids	Protein.Names	Genes	First.Protein.Description	acEF1B_1	acEF1B_2	acEF1B_3	EF1B_1	EF1B_2	EF1B_3
[truncated: 4,526 more rows]

[truncated: 6 more sheets: acARF1_ARF1, acGNAI3_GNAI3, acNDUF4_NDUF4_DDA, liver_acLYN_LYN, liver_acTHOC7_THOC7, acFYN_myrFYN]
