# Supplementary material for: CUL4A-DDB1-DCAF10 is an N-recognin for N-terminally acetylated Src kinases
Source: Research Square preprint supplement (doi:10.21203/rs.3.rs-6184818/v1), 2025-04-01
Supplement: Supplementary file 6 [file fcf6490a2fe4506ef5232477.xlsx]

## Sheet: zyg11B-final for paper
control (Sum intensities of fractions)	siRNA zYG11B (sum intensity of fractions)	Protein.Group	Protein.Ids	Protein.Names	Genes	First.Protein.Description
20.447	NaN	Q9C0D3	A8DPD7;Q9C0D3	ZY11B_HUMAN	ZYG11B	Protein zyg-11 homolog B
15.7047	15.075	Q8TB05	A0A075B769;K7EKR5;K7EM52;K7EM88;K7EQ49;Q8TB05	UBAD1_HUMAN	UBALD1	UBA-like domain-containing protein 1
15.7175	17.7748	Q9BPY3	J3KP39;G3V179;E9PMJ2;Q9BPY3	F118B_HUMAN	FAM118B	Protein FAM118B
16.0642	18.0287	Q9NQ92	J3QRX6;H9KV77;Q9NQ92	COPRS_HUMAN	COPRS	Coordinator of PRMT5 and differentiation stimulator
16.0652	18.2779	P49321-2	Q5T624;P49321-2;E9PRH9;E9PPQ8;E9PI86	NASP_HUMAN	NASP	Isoform of P49321, Isoform 2 of Nuclear autoantigenic sperm protein
16.0908	17.608	O60890;O60890-2	A0A7P0T9W4;A0A7P0T8V5;A0A7P0TBH4;O60890-2;A0A7P0Z4E9;O60890	OPHN1_HUMAN	OPHN1	Oligophrenin-1
16.1619	15.2746	Q96HI0;Q96HI0-2	Q96HI0-2;Q96HI0	SENP5_HUMAN	SENP5	Sentrin-specific protease 5
16.2203	15.7009	P27216;P27216-2	E5RIN3;P27216-2;P27216	ANX13_HUMAN	ANXA13	Annexin A13
16.2666	15.1851	Q92551	C9JNA8;Q92551	IP6K1_HUMAN	IP6K1	Inositol hexakisphosphate kinase 1
16.2727	17.6154	Q8N3V7;Q8N3V7-2;Q8N3V7-3	Q8N3V7-2;Q8N3V7-3;Q8N3V7	SYNPO_HUMAN	SYNPO	Synaptopodin
16.3014	15.2921	Q96GD4-4	J3KRJ2;Q96GD4-4;J3QLN8;J3QR41	AURKB_HUMAN	AURKB	Isoform of Q96GD4, Isoform 4 of Aurora kinase B
16.3228	16.5262	Q6PII3	A0A0B4J1R8;Q6PII3	CC174_HUMAN	CCDC174	Coiled-coil domain-containing protein 174
16.3294	17.6625	Q96B02;Q96B02-2;Q96B02-3	Q96B02-2;Q96B02-3;H0YB73;X6REH9;E5RG25;H3BMM0;Q96B02	UBE2W_HUMAN	UBE2W	Ubiquitin-conjugating enzyme E2 W
16.3751	17.3966	Q9HC44	Q9HC44	GPBL1_HUMAN	GPBP1L1	Vasculin-like protein 1
16.3863	17.6799	Q5SW96	Q5SW96	ARH_HUMAN	LDLRAP1	Low density lipoprotein receptor adapter protein 1
16.3865	15.995	O95425;O95425-2;O95425-3;O95425-4	O95425-2;O95425-3;O95425-4;A0A6I8PIX7;O95425	SVIL_HUMAN	SVIL	Supervillin
16.5662	17.6771	Q05823;Q05823-2	Q05823-2;Q05823	RN5A_HUMAN	RNASEL	2-5A-dependent ribonuclease
16.6214	17.3176	Q9H0V1;Q9H0V1-2	H7C268;Q9H0V1-2;Q9H0V1	TM168_HUMAN	TMEM168	Transmembrane protein 168
16.7224	18.9768	P52747;P52747-2;P52747-3	P52747-2;P52747-3;E7EN86;P52747	ZN143_HUMAN	ZNF143	Zinc finger protein 143
16.7849	17.9308	O75528;O75528-2	O75528-2;O75528	TADA3_HUMAN	TADA3	Transcriptional adapter 3
16.8024	16.583	O15265;O15265-2	O15265-2;A0A2R8YDD6;O15265	ATX7_HUMAN	ATXN7	Ataxin-7
16.8295	16.1364	Q04725;Q04725-2	Q04725-2;Q04725-3;K7EMK7;Q04725	TLE2_HUMAN	TLE2	Transducin-like enhancer protein 2
16.8396	26.8332	A5D8T8-2	A5D8T8-2	CL18A_HUMAN	CLEC18A	Isoform of A5D8T8, Isoform 2 of C-type lectin domain family 18 member A
16.8512	16.1197	Q12778	Q12778	FOXO1_HUMAN	FOXO1	Forkhead box protein O1
16.9042	15.9266	P42696	A2A2V2;P42696	RBM34_HUMAN	RBM34	RNA-binding protein 34
16.935	16.0914	Q5VWN6	A0A2R8YH03;A0A8V8TMM4;A0A8V8TMN1;A0A8Q3SI68;Q5VWN6	TASO2_HUMAN	TASOR2	Protein TASOR 2
17.001	16.1464	Q4VC05;Q4VC05-2	Q4VC05-2;Q4VC05	BCL7A_HUMAN	BCL7A	B-cell CLL/lymphoma 7 protein family member A
17.0463	17.6052	O75553;O75553-3;O75553-4;O75553-5;O75553-6	O75553-3;O75553-4;O75553-5;O75553-6;O75553	DAB1_HUMAN	DAB1	Disabled homolog 1
17.0783	19.6558	Q6Y1H2	Q6Y1H2	HACD2_HUMAN	HACD2	Very-long-chain (3R)-3-hydroxyacyl-CoA dehydratase 2
17.1076	16.1793	Q9P2D1	Q9P2D1-2;Q9P2D1-3;A0A8V8TQJ2;A0A8Q3WKT9;Q9P2D1	CHD7_HUMAN	CHD7	Chromodomain-helicase-DNA-binding protein 7
17.1362	18.1696	P07992;P07992-2	P07992-2;P07992-4;P07992	ERCC1_HUMAN	ERCC1	DNA excision repair protein ERCC-1
17.1597	19.0887	Q8TCD5	J3KRC4;J3KSY6;Q8TCD5	NT5C_HUMAN	NT5C	5'(3')-deoxyribonucleotidase, cytosolic type
17.184	19.061	Q8IUR7;Q8IUR7-2;Q8IUR7-7	C9J2I1;B7Z637;Q8IUR7-2;Q8IUR7-3;Q8IUR7-6;Q8IUR7-7;G5E9V6;G5E9V7;Q8IUR7	ARMC8_HUMAN	ARMC8	Armadillo repeat-containing protein 8
17.1965	17.3994	Q6QNK2;Q6QNK2-4	Q6QNK2-4;F5H7I3;Q6QNK2	AGRD1_HUMAN	ADGRD1	Adhesion G-protein coupled receptor D1
17.2026	17.2376	Q13214;Q13214-2	Q13214-2;A0A0C4DGV8;Q13214	SEM3B_HUMAN	SEMA3B	Semaphorin-3B
17.2363	18.0171	Q9Y580	J3KPD3;F5GY08;F5GXV8;F5H606;F5H674;Q9Y580	RBM7_HUMAN	RBM7	RNA-binding protein 7
17.2822	19.6551	A0A0G2JJB9;Q5STZ8	Q5STZ8;A0A0G2JJB9	A0A0G2JJB9_HUMAN;Q5STZ8_HUMAN	ABCF1	Isoform of Q8NE71, ATP-binding cassette sub-family F member 1 (Fragment)
17.3105	17.159	Q9P0U4;Q9P0U4-2	K7EJR0;K7EQ21;K7EQZ1;A0A669KB29;Q9P0U4-2;Q9P0U4	CXXC1_HUMAN	CXXC1	CXXC-type zinc finger protein 1
17.3145	16.3793	Q92698	V9GYD3;A0A087WV39;Q92698	RAD54_HUMAN	RAD54L	DNA repair and recombination protein RAD54-like
17.214	17.3972	Q9UJ04	Q9UJ04	TSYL4_HUMAN	TSPYL4	Testis-specific Y-encoded-like protein 4
17.4567	17.7931	P07948;P07948-2	P07948-2;E5RJ37;P07948	LYN_HUMAN	LYN	Tyrosine-protein kinase Lyn
17.4735	16.4583	Q9UGK8	H0YEL8;Q9UGK8	SRGEF_HUMAN	SERGEF	Secretion-regulating guanine nucleotide exchange factor
17.4764	17.9944	O00408;O00408-3;O00408-4;O00408-5	O00408-4;O00408-5;O00408-2;O00408-3;O00408-6;E9PEF1;O00408	PDE2A_HUMAN	PDE2A	cGMP-dependent 3',5'-cyclic phosphodiesterase
17.5077	17.7147	Q14676;Q14676-3	A2AB05;Q14676-2;Q14676-3;Q14676-4;Q14676	MDC1_HUMAN	MDC1	Mediator of DNA damage checkpoint protein 1
17.5575	16.1945	H0YDD8	H0YDD8	H0YDD8_HUMAN	RPLP2	Isoform of P05387, 60S acidic ribosomal protein P2 (Fragment)
17.6004	18.7225	G3V542	G3V542	G3V542_HUMAN	TUBB3	Isoform of Q13509, Tubulin beta 3 class III (Fragment)
17.634	17.1983	Q9H1J1;Q9H1J1-2	Q9H1J1-2;Q9H1J1	REN3A_HUMAN	UPF3A	Regulator of nonsense transcripts 3A
17.6507	17.3682	Q9UGU0;Q9UGU0-2	Q9UGU0-2;Q9UGU0	TCF20_HUMAN	TCF20	Transcription factor 20
17.6781	19.0172	O75953;O75953-4;O75953-5	O75953-4;O75953-5;A0A7I2RN43;H0YH04;H0YFL9;Q5T657;H0Y4S1;H7C5W0;O75953	DNJB5_HUMAN	DNAJB5	DnaJ homolog subfamily B member 5
17.8574	17.6792	Q9NPL8	C9JU35;Q9NPL8	TIDC1_HUMAN	TIMMDC1	Complex I assembly factor TIMMDC1, mitochondrial
17.7075	18.7373	Q9Y2H1-2	Q9Y2H1-2;Q9Y2H1	ST38L_HUMAN	STK38L	Isoform of Q9Y2H1, Isoform 2 of Serine/threonine-protein kinase 38-like
17.7251	18.4443	Q8IZ81	D6RBS5;Q8IZ81	ELMD2_HUMAN	ELMOD2	ELMO domain-containing protein 2
17.7251	18.6674	Q2TAA5	A0A7P0T8Y4;A0A3B3IS90;Q2TAA5	ALG11_HUMAN	ALG11	GDP-Man:Man(3)GlcNAc(2)-PP-Dol alpha-1,2-mannosyltransferase
17.7459	17.2579	O75781;O75781-2	O75781-2;O75781	PALM_HUMAN	PALM	Paralemmin-1
17.776	17.4394	Q9NZ43	M0QYT5;Q9NZ43	USE1_HUMAN	USE1	Vesicle transport protein USE1
17.7789	18.8151	P23511;P23511-2	P23511-2;P23511	NFYA_HUMAN	NFYA	Nuclear transcription factor Y subunit alpha
17.7951	18.5342	Q9Y2K7;Q9Y2K7-2;Q9Y2K7-3;Q9Y2K7-5	I3VM54;Q9Y2K7-2;Q9Y2K7-3;Q9Y2K7-4;Q9Y2K7-5;Q9Y2K7	KDM2A_HUMAN	KDM2A	Lysine-specific demethylase 2A
17.8004	18.812	P10646	P10646	TFPI1_HUMAN	TFPI	Tissue factor pathway inhibitor
17.8053	18.3855	O95251;O95251-2;O95251-3;O95251-4;O95251-5	E7EUP3;A0A6Q8PHH2;O95251-2;O95251-3;O95251-4;O95251-5;O95251	KAT7_HUMAN	KAT7	Histone acetyltransferase KAT7
17.8142	16.0196	Q13480;Q13480-2	B7Z3B9;Q13480-2;Q13480	GAB1_HUMAN	GAB1	GRB2-associated-binding protein 1
17.8241	24.006	P08697;P08697-2	C9JMH6;P08697-2;A0A0J9YY65;A0A0G2JPA8;P08697	A2AP_HUMAN	SERPINF2	Alpha-2-antiplasmin
17.8597	18.222	Q9BQE9;Q9BQE9-2;Q9BQE9-4	Q9BQE9-2;Q9BQE9-4;F2Z3H6;Q9BQE9	BCL7B_HUMAN	BCL7B	B-cell CLL/lymphoma 7 protein family member B
17.8606	18.3626	Q15005	E9PRB9;E9PL01;E9PI68;Q15005	SPCS2_HUMAN	SPCS2	Signal peptidase complex subunit 2
17.8692	18.4536	O75864	F5H3P7;O75864	PPR37_HUMAN	PPP1R37	Protein phosphatase 1 regulatory subunit 37
17.9125	19.6333	Q7L099;Q7L099-2;Q7L099-3;Q7L099-4	H0Y8I0;H0Y8G6;Q7L099-2;Q7L099-3;Q7L099-4;Q7L099	RUFY3_HUMAN	RUFY3	Protein RUFY3
17.9172	17.2013	A0A7I2YQV8	A0A7I2YQV8	A0A7I2YQV8_HUMAN	SYNCRIP	Isoform of O60506, Synaptotagmin binding cytoplasmic RNA interacting protein
17.9224	17.896	B2RTY4;B2RTY4-2;B2RTY4-4;B2RTY4-5	H3BV44;H3BRD5;H3BMM1;B2RTY4-2;B2RTY4-4;B2RTY4-5;B2RTY4	MYO9A_HUMAN	MYO9A	Unconventional myosin-IXa
17.9277	17.681	P10301	P10301	RRAS_HUMAN	RRAS	Ras-related protein R-Ras
17.9365	19.2186	Q8NEL9;Q8NEL9-2;Q8NEL9-3;Q8NEL9-4	A0A6E1W401;Q8NEL9-2;Q8NEL9-3;Q8NEL9-4;A0A087X0H7;A0A669KB51;A0A669KB64;Q8NEL9	DDHD1_HUMAN	DDHD1	Phospholipase DDHD1
17.9494	16.0065	Q9P2N6-3;Q9P2N6-4;Q9P2N6-5;Q9P2N6-6	Q9P2N6-3;Q9P2N6-4;Q9P2N6-5;Q9P2N6-6;A0A590UJ53;Q9P2N6	KANL3_HUMAN	KANSL3	Isoform of Q9P2N6, Isoform 3 of KAT8 regulatory NSL complex subunit 3
17.9602	NaN	Q9HBG6;Q9HBG6-10;Q9HBG6-3;Q9HBG6-4;Q9HBG6-5;Q9HBG6-6;Q9HBG6-7;Q9HBG6-8;Q9HBG6-9	Q9HBG6-10;A0A8I5QKR8;A0A8I5QKV2;A0A8I5QKV6;A0A8I5QKX8;A0A8I5QL25;A0A8I5QKJ5;Q9HBG6-3;Q9HBG6-4;Q9HBG6-5;Q9HBG6-6;Q9HBG6-7;Q9HBG6-8;Q9HBG6-9;A0A8J9A3C6;D6RIB5;H0Y978;A0A8I5KQ16;A0A8I5KP73;A0A8I5KS77;A0A8I5KSG5;A0A8I5KR03;A0A8I5KTT9;A0A8I5KSN5;A0A8I5KSV0;A0A8I5KT04;A0A8I5KTL4;A0A8I5KWK4;A0A8I5KX14;A0A8I5KX44;A0A8I5KVC7;A0A8I5KUU2;A0A8I5KUV2;A0A8I5KYB6;A0A8I5KYX1;A0A8I5KYT5;A0A8I5KXC8;A0A8I5KXT5;Q9HB…	IF122_HUMAN	IFT122	Intraflagellar transport protein 122 homolog
17.9835	16.9033	Q92817	K7EKI0;Q92817	EVPL_HUMAN	EVPL	Envoplakin
18.0091	18.3225	Q9H079	H0YNW3;H0YNG2;H0YNH1;H0YL62;H0YKW3;Q9H079	KTBL1_HUMAN	KATNBL1	KATNB1-like protein 1
18.0202	18.9443	K7EL68	K7EL68	K7EL68_HUMAN	CDC37	Isoform of Q16543, Cell division cycle 37, HSP90 cochaperone (Fragment)
18.0225	19.4252	Q8TDB6	Q8TDB6	DTX3L_HUMAN	DTX3L	E3 ubiquitin-protein ligase DTX3L
18.0541	17.6189	Q9BUR5;Q9BUR5-2	Q9BUR5-2;G3V1B6;H7C1U8;Q9BUR5	MIC26_HUMAN	APOO	MICOS complex subunit MIC26
18.0646	18.5587	A0A096LP07;A0A096LPJ3;A8K070	A0A096LP07;A0A096LPJ3;A8K070	A0A096LP07_HUMAN;A0A096LPJ3_HUMAN;A8K070_HUMAN	GPS1	Isoform of Q13098, G protein pathway suppressor 1
18.0662	18.2677	Q5THJ4;Q5THJ4-2	H3BLS7;Q5THJ4-2;Q5THJ4	VP13D_HUMAN	VPS13D	Intermembrane lipid transfer protein VPS13D
18.0712	17.9269	Q9NX14;Q9NX14-2	A0A8J8YU24;A0A8I5KQF7;A0A8I5KTD1;Q9NX14-2;Q9NX14	NDUBB_HUMAN	NDUFB11	NADH dehydrogenase [ubiquinone] 1 beta subcomplex subunit 11, mitochondrial
18.0747	18.1848	O60547;O60547-2	O60547-2;O60547	GMDS_HUMAN	GMDS	GDP-mannose 4,6 dehydratase
18.1139	18.4896	Q9H2Y7	H3BSS6;H3BNX5;Q9H2Y7	ZN106_HUMAN	ZNF106	Zinc finger protein 106
18.1204	17.7537	Q6ZXV5;Q6ZXV5-2	Q6ZXV5-2;Q6ZXV5	TMTC3_HUMAN	TMTC3	Protein O-mannosyl-transferase TMTC3
18.1228	NaN	Q9P0S2	A0A087WX56;A0A087X1F5;A0A087WYV9;Q9P0S2	COX16_HUMAN	COX16	Cytochrome c oxidase assembly protein COX16 homolog, mitochondrial
18.1263	17.6602	Q5QJE6	J3KP30;E9PRB3;Q5QJE6	TDIF2_HUMAN	DNTTIP2	Deoxynucleotidyltransferase terminal-interacting protein 2
18.1495	19.0712	Q9NYR9;Q9NYR9-2	Q9NYR9-2;K7ERG2;Q9NYR9	KBRS2_HUMAN	NKIRAS2	NF-kappa-B inhibitor-interacting Ras-like protein 2
18.1775	18.7245	Q96DT6	H7BZW5;Q96DT6	ATG4C_HUMAN	ATG4C	Cysteine protease ATG4C
18.1871	17.7233	Q8N2K1;Q8N2K1-2;Q8N2K1-3	A6NGS0;D6RD90;Q8N2K1-2;Q8N2K1-3;B1AMF0;Q8N2K1	UB2J2_HUMAN	UBE2J2	Ubiquitin-conjugating enzyme E2 J2
18.2074	17.5534	Q9H1A3;Q9H1A3-2	Q9H1A3-2;H3BQD2;H3BN86;H3BM54;Q9H1A3	METL9_HUMAN	METTL9	Protein-L-histidine N-pros-methyltransferase
18.2353	17.3865	O94868;O94868-2;O94868-3	O94868-2;O94868-3;C9JM66;E9PG19;O94868	FCSD2_HUMAN	FCHSD2	F-BAR and double SH3 domains protein 2
18.2378	17.7396	O95299	E7ESZ7;A0A7I2YQU0;A0A087WXC5;A0A7I2V3H5;A0A7I2V594;O95299	NDUAA_HUMAN	NDUFA10	NADH dehydrogenase [ubiquinone] 1 alpha subcomplex subunit 10, mitochondrial
18.2546	17.5254	Q9BW83;Q9BW83-2	Q9BW83-2;B1AH56;B1AH58;H0Y6C7;F5GZ09;Q9BW83	IFT27_HUMAN	IFT27	Intraflagellar transport protein 27 homolog
18.274	19.0066	Q9H2J7;Q9H2J7-2	Q9H2J7-2;F8VSG1;A0A7P0T9P8;A0A7P0T9Z9;A0A7P0T8B7;A0A7P0T8I1;A0A7P0TAT1;A0A7P0TAZ8;A0A7P0TBL2;A0A7P0TA72;A0A7P0TB05;A0A7P0Z4F0;Q9H2J7	S6A15_HUMAN	SLC6A15	Sodium-dependent neutral amino acid transporter B(0)AT2
18.2746	16.9889	Q92667;Q92667-2	I3L3K1;I3L364;I3L2N7;I3L2A2;I3L0K6;Q92667-2;Q92667	AKAP1_HUMAN	AKAP1	A-kinase anchor protein 1, mitochondrial
18.2819	16.4302	Q9BVW5	H3BU04;Q9BVW5	TIPIN_HUMAN	TIPIN	TIMELESS-interacting protein
18.2866	18.6464	Q9UPN4;Q9UPN4-2;Q9UPN4-3	I3L2J8;Q9UPN4-2;Q9UPN4-3;Q9UPN4	CP131_HUMAN	CEP131	Centrosomal protein of 131 kDa
18.2947	20.4818	O95104;O95104-3	O95104-2;O95104-3;O95104	SCAF4_HUMAN	SCAF4	SR-related and CTD-associated factor 4
18.2972	15.6277	Q16659	Q16659	MK06_HUMAN	MAPK6	Mitogen-activated protein kinase 6
18.3199	17.4293	O60307	A0A8V8TMW0;A0A8V8TMM3;A0A8V8TLL8;A0A8I5KST9;A0A994J700;O60307	MAST3_HUMAN	MAST3	Microtubule-associated serine/threonine-protein kinase 3
18.3423	18.2867	O95405;O95405-2;O95405-3	O95405-3;O95405-2;O95405	ZFYV9_HUMAN	ZFYVE9	Zinc finger FYVE domain-containing protein 9
18.3446	16.0051	Q5T6S3;Q5T6S3-2;Q5T6S3-3	B0QZ72;Q5T6S3-2;Q5T6S3-3;X6RER8;A0A087X169;Q5T6S3	PHF19_HUMAN	PHF19	PHD finger protein 19
18.3541	17.4984	Q53ET0	Q53ET0	CRTC2_HUMAN	CRTC2	CREB-regulated transcription coactivator 2
18.3749	17.161	Q9NZU5;Q9NZU5-2	Q9NZU5-2;B4DEY6;H7C3D2;Q9NZU5	LMCD1_HUMAN	LMCD1	LIM and cysteine-rich domains protein 1
18.3801	18.5806	Q9UF56;Q9UF56-2;Q9UF56-3	A0A6E1XD66;Q9UF56-2;Q9UF56-3;Q9UF56	FXL17_HUMAN	FBXL17	F-box/LRR-repeat protein 17
18.3854	16.286	Q15911;Q15911-2	Q15911-2;Q15911	ZFHX3_HUMAN	ZFHX3	Zinc finger homeobox protein 3
18.3933	17.9535	Q9P242	A0A8V8N5G5;Q9P242	NYAP2_HUMAN	NYAP2	Neuronal tyrosine-phosphorylated phosphoinositide-3-kinase adapter 2
18.4191	18.4758	Q06190	Q06190	P2R3A_HUMAN	PPP2R3A	Serine/threonine-protein phosphatase 2A regulatory subunit B'' subunit alpha
18.4356	20.4906	Q9NWZ8	Q9NWZ8	GEMI8_HUMAN	GEMIN8	Gem-associated protein 8
18.4528	17.8911	Q9NX63	F8WAR4;A0A286YEX5;C9JRZ6;Q9NX63	MIC19_HUMAN	CHCHD3	MICOS complex subunit MIC19
18.4569	18.2454	Q14596;Q14596-2	Q14596-2;B7Z5R6;Q14596	NBR1_HUMAN	NBR1	Next to BRCA1 gene 1 protein
18.4661	18.9653	Q9UKT7	C9J0Y7;Q9UKT7	FBXL3_HUMAN	FBXL3	F-box/LRR-repeat protein 3
18.4688	17.8925	Q3B7T1;Q3B7T1-5	Q3B7T1-5;Q3B7T1	EDRF1_HUMAN	EDRF1	Erythroid differentiation-related factor 1
18.4839	19.3802	A0A0A0MR33;A0A0C4DFM0;G3V4T6;G3V5T0	G3V5T0;G3V4T6;A0A0A0MR33;A0A0C4DFM0	A0A0A0MR33_HUMAN;A0A0C4DFM0_HUMAN;G3V4T6_HUMAN;G3V5T0_HUMAN	GSTZ1	Isoform of O43708, Glutathione S-transferase zeta 1
18.4898	NaN	Q9BUX1	Q9BUX1	CHAC1_HUMAN	CHAC1	Glutathione-specific gamma-glutamylcyclotransferase 1
18.5199	16.4043	Q8IWI9;Q8IWI9-3	Q8IWI9-3;A0A994J6L2;Q8IWI9	MGAP_HUMAN	MGA	MAX gene-associated protein
18.5364	18.65	Q86XP1;Q86XP1-2;Q86XP1-3;Q86XP1-5	A0A0D9SFR6;Q86XP1-2;Q86XP1-3;Q86XP1-5;Q86XP1	DGKH_HUMAN	DGKH	Diacylglycerol kinase eta
18.5426	16.788	Q765P7	Q765P7-2;I3L2G4;Q765P7	MTSS2_HUMAN	MTSS2	Protein MTSS 2
18.5469	NaN	Q9NTW7;Q9NTW7-2;Q9NTW7-3	Q9NTW7-2;Q9NTW7-3;A2A2N5;A2A2N6;Q9NTW7	ZF64B_HUMAN	ZFP64	Zinc finger protein 64
18.579	16.8216	P19793;P19793-2	A0A5F9ZHH6;P19793-2;P19793	RXRA_HUMAN	RXRA	Retinoic acid receptor RXR-alpha
18.5854	19.08	P15408;P15408-3	C9JCN8;P15408-3;P15408-2;P15408	FOSL2_HUMAN	FOSL2	Fos-related antigen 2
18.5904	18.7725	P06400	A0A3B3IS71;P06400	RB_HUMAN	RB1	Retinoblastoma-associated protein
18.5907	18.1744	Q8TEP8;Q8TEP8-1	Q8TEP8-1;H0Y966;A0A0A0MR42;K7ENP4;K7EPA2;Q8TEP8	CE192_HUMAN	CEP192	Centrosomal protein of 192 kDa
18.604	18.5531	P30622;P30622-1	P30622-1;F5H6A0;F5H0N7;P30622	CLIP1_HUMAN	CLIP1	CAP-Gly domain-containing linker protein 1
18.6112	NaN	Q9NYI0;Q9NYI0-2;Q9NYI0-3	Q9NYI0-2;Q9NYI0-3;H0YC20;H0YAQ7;E5RJ29;E5RJE4;E5RH02;E5RFG7;Q9NYI0	PSD3_HUMAN	PSD3	PH and SEC7 domain-containing protein 3
18.6137	19.2797	Q7Z3E5	Q7Z3E5-2;C9JW07;A0A804HI20;A0A804HJ95;A0A804HIT2;A0A804HIU9;A0A804HJ52;A0A804HHZ1;A0A804HIH2;H7BZY2;A0A804HLH5;A0A804HK42;A0A804HK85;A0A804HJI1;A0A804HL13;A0A2Q3DP09;Q7Z3E5	ARMC9_HUMAN	ARMC9	LisH domain-containing protein ARMC9
18.6203	17.5314	Q8WVM0	Q8WVM0	TFB1M_HUMAN	TFB1M	Dimethyladenosine transferase 1, mitochondrial
18.6522	18.1552	Q8IXQ6;Q8IXQ6-2;Q8IXQ6-3	Q8IXQ6-2;Q8IXQ6-3;Q8IXQ6	PARP9_HUMAN	PARP9	Protein mono-ADP-ribosyltransferase PARP9
18.6541	19.0427	Q5T5P2;Q5T5P2-3	Q5T5P2-6;Q5T5P2-7;Q5T5P2-8;Q5T5P2-9;Q5T5P2-2;Q5T5P2-3;Q5T5P2-4;A0A8Q3WMI8;Q5T5P2	SKT_HUMAN	KIAA1217	Sickle tail protein homolog
18.6542	NaN	O15061;O15061-2	O15061-2;A0A075B7B1;H0YL34;O15061	SYNEM_HUMAN	SYNM	Synemin
18.6559	17.3909	Q9UJZ1;Q9UJZ1-2	Q9UJZ1-2;A0A087WYB4;F2Z2I8;Q9UJZ1	STML2_HUMAN	STOML2	Stomatin-like protein 2, mitochondrial
18.6567	18.6559	Q8N5C6	Q8N5C6	SRBD1_HUMAN	SRBD1	S1 RNA-binding domain-containing protein 1
18.6587	19.092	H0Y400	H0Y400	H0Y400_HUMAN	DDX39B	Isoform of Q13838, DExD-box helicase 39B (Fragment)
18.6658	18.4278	O43257	O43257	ZNHI1_HUMAN	ZNHIT1	Zinc finger HIT domain-containing protein 1
18.712	18.3403	Q8NFP9	A0A8I5QKR1;A0A8I5QKR6;Q5T321;A0A8I5KTY1;A0A8I5KSX3;A0A8I5KZ13;Q8NFP9	NBEA_HUMAN	NBEA	Neurobeachin
18.7163	16.9425	Q9ULH0;Q9ULH0-2;Q9ULH0-4;Q9ULH0-5	Q9ULH0-2;Q9ULH0-4;Q9ULH0-5;A0A8I5KT58;A0A8I5KX08;Q9ULH0	KDIS_HUMAN	KIDINS220	Kinase D-interacting substrate of 220 kDa
18.7196	NaN	O15169;O15169-2	O15169-2;O15169	AXIN1_HUMAN	AXIN1	Axin-1
18.7331	19.0338	Q8IVV7	K7ELH7;K7ENE2;Q8IVV7	GID4_HUMAN	GID4	Glucose-induced degradation protein 4 homolog
18.7394	18.2729	P51617;P51617-2;P51617-3;P51617-4	P51617-2;P51617-3;P51617-4;H7C2I6;H7C224;D3YTB5;P51617	IRAK1_HUMAN	IRAK1	Interleukin-1 receptor-associated kinase 1
18.7485	18.3828	Q9H825;Q9H825-2	B5ME25;B3KW44;Q9H825-2;Q9H825	METL8_HUMAN	METTL8	tRNA N(3)-methylcytidine methyltransferase METTL8, mitochondrial
18.7517	18.5187	Q96FK6	G3V4B8;Q96FK6	WDR89_HUMAN	WDR89	WD repeat-containing protein 89
18.754	18.5074	Q6ZNE5;Q6ZNE5-2	Q6ZNE5-2;Q6ZNE5	BAKOR_HUMAN	ATG14	Beclin 1-associated autophagy-related key regulator
18.7738	18.0415	Q86VW0	Q86VW0	SESD1_HUMAN	SESTD1	SEC14 domain and spectrin repeat-containing protein 1
18.7772	16.424	Q03933;Q03933-2	Q03933-2;V9GZ44;Q03933	HSF2_HUMAN	HSF2	Heat shock factor protein 2
18.7927	17.9682	Q5VVM6;Q5VVM6-2	A0A2U3TZI4;A0A590UKA6;A0A590UK35;A0A590UJL6;A0A590UK19;A0A590UK05;A0A590UJA8;A0A590UJC1;A0A590UJ92;A0A590UJ83;A0A590UJ28;Q5VVM6-2;Q5VVM6	CCD30_HUMAN	CCDC30	Coiled-coil domain-containing protein 30
18.8025	18.6488	Q13099;Q13099-1;Q13099-3	Q13099-1;Q13099-3;F5H6C2;Q13099	IFT88_HUMAN	IFT88	Intraflagellar transport protein 88 homolog
18.8392	NaN	Q9BUN5	Q9BUN5	CC28B_HUMAN	CCDC28B	Coiled-coil domain-containing protein 28B
18.8588	17.8104	Q86YT9;Q86YT9-2;Q86YT9-3;Q86YT9-4	A0A1W2PRS4;E9PR26;E9PNS8;E9PJJ4;E9PKK2;Q86YT9-3;Q86YT9-4;Q86YT9-2;Q86YT9	JAML_HUMAN	JAML	Junctional adhesion molecule-like
18.8653	17.7267	Q96L91;Q96L91-2;Q96L91-3;Q96L91-4;Q96L91-5	Q96L91-2;Q96L91-3;Q96L91-4;Q96L91-5;Q96L91	EP400_HUMAN	EP400	E1A-binding protein p400
18.8804	20.9473	B7ZAP0;Q5R372-5;Q5R372-6;Q5R372-7;Q5R372-8	A0A0U1RQV7;B7ZAP0;Q5R372-5;Q5R372-6;Q5R372-7;Q5R372-8;A0A804HKD7;E9PS63;F5H8L0	RBG10_HUMAN;RBG1L_HUMAN	RABGAP1L	Isoform of Q5R372, Rab GTPase-activating protein 1-like, isoform 10
18.8824	16.6354	O95235;O95235-2	O95235-2;O95235	KI20A_HUMAN	KIF20A	Kinesin-like protein KIF20A
18.8841	17.4923	P51530;P51530-4	P51530-4;H0Y455;P51530	DNA2_HUMAN	DNA2	DNA replication ATP-dependent helicase/nuclease DNA2
18.8912	18.1159	Q9H4B0;Q9H4B0-2;Q9H4B0-3	E7EVL7;Q9H4B0-3;Q9H4B0-2;E5RIL9;E5RGZ1;Q9H4B0	OSGL1_HUMAN	OSGEPL1	tRNA N6-adenosine threonylcarbamoyltransferase, mitochondrial
18.8919	22.7712	Q96T58	A0A994J7B7;Q96T58	MINT_HUMAN	SPEN	Msx2-interacting protein
18.8964	19.0281	Q99574	C9JQU8;C9JDY5;Q99574	NEUS_HUMAN	SERPINI1	Neuroserpin
18.8968	20.1618	Q7Z6G8	F8VVQ4;A0A804HKX1;J3QSU0;Q7Z6G8	ANS1B_HUMAN	ANKS1B	Ankyrin repeat and sterile alpha motif domain-containing protein 1B
18.9095	18.9686	Q6ZUM4;Q6ZUM4-2;Q6ZUM4-3	A0A0G2JRG8;A0A0G2JNY3;E9PNT2;E9PNX6;E9PIR1;A0A8I5KVA8;Q6ZUM4-2;Q6ZUM4-3;A0A0C4DGE6;Q6ZUM4	RHG27_HUMAN	ARHGAP27	Rho GTPase-activating protein 27
18.9204	18.8573	Q8IWB9;Q8IWB9-2	J3KRZ8;Q8IWB9-2;Q8IWB9	TEX2_HUMAN	TEX2	Testis-expressed protein 2
18.9284	18.4641	A0AVF1;A0AVF1-2;A0AVF1-3	A0AVF1-2;A0AVF1-3;B7Z6R6;B7Z2T3;A0AVF1	IFT56_HUMAN	IFT56	Intraflagellar transport protein 56
18.9379	18.882	Q659C4;Q659C4-2;Q659C4-9	D6RJB0;D6R9W6;H0Y9K3;G3V0E9;Q659C4-2;Q659C4-3;Q659C4-9;A0A3B3ISF0;A0A3B3IT29;A0A994J4X5;A0A994J4H9;Q659C4	LAR1B_HUMAN	LARP1B	La-related protein 1B
18.9723	20.4375	Q9UER7;Q9UER7-2;Q9UER7-3;Q9UER7-4;Q9UER7-5	B4E1C1;Q9UER7-2;Q9UER7-3;Q9UER7-4;Q9UER7-5;Q9UER7	DAXX_HUMAN	DAXX	Death domain-associated protein 6
19.009	18.7019	O43187	O43187	IRAK2_HUMAN	IRAK2	Interleukin-1 receptor-associated kinase-like 2
19.0099	18.3081	Q68CL5;Q68CL5-1;Q68CL5-4	Q68CL5-1;Q68CL5-4;Q68CL5	TPGS2_HUMAN	TPGS2	Tubulin polyglutamylase complex subunit 2
19.0236	18.42	Q9Y2J4;Q9Y2J4-2;Q9Y2J4-3;Q9Y2J4-4	Q9Y2J4-2;Q9Y2J4-3;Q9Y2J4-4;Q9Y2J4	AMOL2_HUMAN	AMOTL2	Angiomotin-like protein 2
19.0252	18.119	Q96PY6;Q96PY6-2;Q96PY6-3;Q96PY6-4;Q96PY6-6	A0A8I5QL42;Q96PY6-2;Q96PY6-3;Q96PY6-4;Q96PY6-6;A0A8I5KRM5;A0A8I5KSI3;A0A8I5KUL6;Q96PY6	NEK1_HUMAN	NEK1	Serine/threonine-protein kinase Nek1
19.0366	19.9012	P25445;P25445-6	Q59FU8;P25445-6;A0A8Q3WLI5;A0A8Q3WLK1;A0A8Q3WLK6;A0A8Q3WLL4;A0A8Q3SIR6;A0A8Q3SJI5;P25445	TNR6_HUMAN	FAS	Tumor necrosis factor receptor superfamily member 6
19.0451	16.9015	P36952	P36952	SPB5_HUMAN	SERPINB5	Serpin B5
19.0539	NaN	Q9H6U8;Q9H6U8-3	A0A087WTZ3;A0A087WVC0;A0A087WX16;Q9H6U8-3;A0A087WZY8;A0A087WZ62;Q9H6U8	ALG9_HUMAN	ALG9	Alpha-1,2-mannosyltransferase ALG9
19.0583	18.5421	Q15072	Q15072	OZF_HUMAN	ZNF146	Zinc finger protein OZF
19.0794	18.5535	P25440;P25440-2;P25440-3;P25440-4	H0Y6K2;A0A140T9E9;A0A140T9I1;P25440-2;P25440-3;P25440-4;A0A0G2JK44;A0A0G2JHN8;P25440	BRD2_HUMAN	BRD2	Bromodomain-containing protein 2
19.0798	18.2117	O75828	O75828	CBR3_HUMAN	CBR3	Carbonyl reductase [NADPH] 3
19.087	19.2393	P32780;P32780-2	P32780-2;E9PM51;P32780	TF2H1_HUMAN	GTF2H1	General transcription factor IIH subunit 1
19.091	18.7641	Q9Y2H6;Q9Y2H6-2	G5E9X3;Q9Y2H6-2;Q9Y2H6	FND3A_HUMAN	FNDC3A	Fibronectin type-III domain-containing protein 3A
19.0942	19.5855	Q9P2W9	D6RF48;D6RC71;Q9P2W9	STX18_HUMAN	STX18	Syntaxin-18
19.0973	19.2577	Q9UL03;Q9UL03-3	G5E9X1;B3KU90;Q9UL03-3;Q9UL03	INT6_HUMAN	INTS6	Integrator complex subunit 6
19.1159	17.1477	P50219;P50219-2	P50219-2;P50219	MNX1_HUMAN	MNX1	Motor neuron and pancreas homeobox protein 1
19.1196	18.5613	O60237;O60237-6	O60237-3;O60237-4;O60237-6;A0A994J7P4;O60237	MYPT2_HUMAN	PPP1R12B	Protein phosphatase 1 regulatory subunit 12B
19.124	17.6968	Q9BZ95;Q9BZ95-2;Q9BZ95-4;Q9BZ95-5	Q9BZ95-2;Q9BZ95-3;Q9BZ95-4;Q9BZ95-5;Q9BZ95	NSD3_HUMAN	NSD3	Histone-lysine N-methyltransferase NSD3
19.1375	17.8682	Q96NL6;Q96NL6-2;Q96NL6-3	Q96NL6-2;Q96NL6-3;D6RBP0;D6RBA6;A0A494C0G8;Q96NL6	SCLT1_HUMAN	SCLT1	Sodium channel and clathrin linker 1
19.1528	18.5126	Q86XK3;Q86XK3-2;Q86XK3-3	Q86XK3-2;Q86XK3-3;Q86XK3	SFR1_HUMAN	SFR1	Swi5-dependent recombination DNA repair protein 1 homolog
19.1565	19.0751	Q9BW30	Q9BW30	TPPP3_HUMAN	TPPP3	Tubulin polymerization-promoting protein family member 3
19.1633	17.8959	Q9HB09;Q9HB09-3	A0A0X9JZX1;Q9HB09-3;A0A0X8AXX1;A0A0X8ASA9;A0A0X8AT42;A0A087WSV0;Q9HB09	B2L12_HUMAN	BCL2L12	Bcl-2-like protein 12
19.1798	18.3707	O00512	A0A804HI55;A0A804HIV1;O00512	BCL9_HUMAN	BCL9	B-cell CLL/lymphoma 9 protein
19.1932	NaN	Q9BWT6	A0A6Q8PFL9;A0A6Q8PF18;A0A6Q8PHG4;Q9BWT6	MND1_HUMAN	MND1	Meiotic nuclear division protein 1 homolog
19.2102	17.6615	Q16181-2	Q16181-2	SEPT7_HUMAN	SEPTIN7	Isoform of Q16181, Isoform 2 of Septin-7
19.2215	18.2551	Q9Y3E0	G3V1U5;Q9Y3E0	GOT1B_HUMAN	GOLT1B	Vesicle transport protein GOT1B
19.2241	NaN	O15439;O15439-2	O15439-2;O15439	MRP4_HUMAN	ABCC4	ATP-binding cassette sub-family C member 4
19.2254	18.8934	Q8WWN8	Q8WWN8-2;G5E9Y3;Q8WWN8	ARAP3_HUMAN	ARAP3	Arf-GAP with Rho-GAP domain, ANK repeat and PH domain-containing protein 3
19.234	19.6905	Q14542;Q14542-3	Q14542-3;Q14542-4;Q14542	S29A2_HUMAN	SLC29A2	Equilibrative nucleoside transporter 2
19.2401	19.5449	Q13188	Q13188-2;A0A087WZ06;Q13188	STK3_HUMAN	STK3	Serine/threonine-protein kinase 3
19.243	19.3626	Q9UM13	A0A286YEY6;D6RA92;D6RD74;D6R9Q5;A0A3B3ISY7;Q9UM13	APC10_HUMAN	ANAPC10	Anaphase-promoting complex subunit 10
19.2457	19.1057	Q9NVN3;Q9NVN3-1;Q9NVN3-3	Q9NVN3-1;Q9NVN3-3;F8VY51;B7WPL0;Q9NVN3	RIC8B_HUMAN	RIC8B	Synembryn-B
19.2587	19.5821	O95273;O95273-2	H3BR23;H3BQA6;O95273-2;O95273	CCDB1_HUMAN	CCNDBP1	Cyclin-D1-binding protein 1
19.2651	17.8513	Q04724	A0A669KBK8;Q04724	TLE1_HUMAN	TLE1	Transducin-like enhancer protein 1
19.266	18.7223	Q9H3F6	F5H6V0;F5H497;Q9H3F6	BACD3_HUMAN	KCTD10	BTB/POZ domain-containing adapter for CUL3-mediated RhoA degradation protein 3
19.2786	19.157	Q96L73;Q96L73-2;Q96L73-3	A0A8I5QJP2;Q96L73-3;Q96L73-2;Q96L73	NSD1_HUMAN	NSD1	Histone-lysine N-methyltransferase, H3 lysine-36 specific
19.2801	19.218	Q9NWK9	Q9NWK9-2;Q9NWK9	BCD1_HUMAN	ZNHIT6	Box C/D snoRNA protein 1
19.2878	18.7839	Q9BYW2	Q9BYW2-2;Q9BYW2-3;C9JG86;A0A1W2PPX9;A0A8I5KV15;Q9BYW2	SETD2_HUMAN	SETD2	Histone-lysine N-methyltransferase SETD2
19.2882	18.7019	Q6AWC2;Q6AWC2-4;Q6AWC2-6	Q6AWC2-2;Q6AWC2-4;Q6AWC2-5;Q6AWC2-6;Q6AWC2	WWC2_HUMAN	WWC2	Protein WWC2
19.296	19.5312	Q9NVA4	Q9NVA4	T184C_HUMAN	TMEM184C	Transmembrane protein 184C
19.3038	19.2916	Q8N9M5	Q8N9M5	TM102_HUMAN	TMEM102	Transmembrane protein 102
19.3091	18.3849	O15446;O15446-2	O15446-2;O15446	RPA34_HUMAN	POLR1G	DNA-directed RNA polymerase I subunit RPA34
19.3149	19.4208	Q6NS38;Q6NS38-2	S4R3T5;F5GZZ0;Q6NS38-2;F5H5X2;Q6NS38	ALKB2_HUMAN	ALKBH2	DNA oxidative demethylase ALKBH2
19.3241	NaN	Q9NUX5;Q9NUX5-2	A8MTK3;Q9NUX5-2;B7Z7M5;Q5MJ34;A0A590UJP0;A0A590UJF2;A0A590UJF7;Q9NUX5	POTE1_HUMAN	POT1	Protection of telomeres protein 1
19.3302	NaN	E9PMW7;E9PN91;H0YCK7	H0YCK7;E9PMW7;E9PN91	E9PMW7_HUMAN;E9PN91_HUMAN;H0YCK7_HUMAN	EEF1D	Isoform of P29692, Eukaryotic translation elongation factor 1 delta
19.3339	18.7988	P23634;P23634-2;P23634-4;P23634-6	P23634-2;P23634-3;P23634-4;P23634-5;P23634-6;P23634-7;P23634-8;P23634	AT2B4_HUMAN	ATP2B4	Plasma membrane calcium-transporting ATPase 4
19.3376	18.1664	Q16600	Q16600	ZN239_HUMAN	ZNF239	Zinc finger protein 239
19.3434	19.1975	Q9ULP9;Q9ULP9-2	A0A2R8Y518;H3BV07;Q9ULP9-2;A0A0D9SFR5;H3BQ06;Q9ULP9	TBC24_HUMAN	TBC1D24	TBC1 domain family member 24
19.3439	18.9194	Q9Y3T9	Q9Y3T9	NOC2L_HUMAN	NOC2L	Nucleolar complex protein 2 homolog
19.3805	20.3083	Q9NVI7-2;Q9NVI7-3	Q9NVI7-2;Q9NVI7-3;H0Y2W2;Q5T9A4	ATD3A_HUMAN	ATAD3A	Isoform of Q9NVI7, Isoform 2 of ATPase family AAA domain-containing protein 3A
19.3846	19.0601	Q9BW62	Q9BW62	KATL1_HUMAN	KATNAL1	Katanin p60 ATPase-containing subunit A-like 1
19.4023	20.1623	Q5VTB9;Q5VTB9-3	Q5TDE7;Q5TDE8;Q5VTB9-3;Q5VTB9	RN220_HUMAN	RNF220	E3 ubiquitin-protein ligase RNF220
19.4059	20.053	Q8N4J0	Q5T8V1;Q8N4J0	CARME_HUMAN	CARNMT1	Carnosine N-methyltransferase
19.4072	19.1639	Q8IYR2	I3L428;Q8IYR2	SMYD4_HUMAN	SMYD4	SET and MYND domain-containing protein 4
19.4206	18.9909	Q9BZF1-2	F8VUA7;F8VQX7;Q9BZF1-2;Q9BZF1-3;Q9BZF1	OSBL8_HUMAN	OSBPL8	Isoform of Q9BZF1, Isoform 2 of Oxysterol-binding protein-related protein 8
19.4305	18.3216	Q99766	A0A5K1VW60;Q99766	ATP5S_HUMAN	DMAC2L	ATP synthase subunit s, mitochondrial
19.4326	16.5688	O60308	A0A6Q8PFR4;A0A6Q8PGB3;A0A6Q8PH69;A0A6Q8PHE1;A0A6Q8PHR0;Q5SR27;J3QLL3;O60308	CE104_HUMAN	CEP104	Centrosomal protein of 104 kDa
19.4377	20.1672	Q96RR4;Q96RR4-2;Q96RR4-3;Q96RR4-4;Q96RR4-5;Q96RR4-6;Q96RR4-7	Q96RR4-2;Q96RR4-3;Q96RR4-4;Q96RR4-5;Q96RR4-6;Q96RR4-7;F5GZ00;Q96RR4	KKCC2_HUMAN	CAMKK2	Calcium/calmodulin-dependent protein kinase kinase 2
19.4472	NaN	Q9H7F0;Q9H7F0-2	A0A2R8Y635;A0A2R8YDN7;Q9H7F0-2;Q9H7F0	AT133_HUMAN	ATP13A3	Polyamine-transporting ATPase 13A3
19.4536	20.3327	Q86SF2	E9PBY3;H0YAH3;Q86SF2	GALT7_HUMAN	GALNT7	N-acetylgalactosaminyltransferase 7
19.4784	19.3619	P42568;P42568-2	P42568-2;P42568	AF9_HUMAN	MLLT3	Protein AF-9
19.4794	21.2426	Q9UPR3	Q9UPR3	SMG5_HUMAN	SMG5	Nonsense-mediated mRNA decay factor SMG5
19.4882	20.3033	Q9Y6A9	C9JBL1;A0A5F9YFS9;Q9Y6A9	SPCS1_HUMAN	SPCS1	Signal peptidase complex subunit 1
19.4885	17.3378	O76054;O76054-4;O76054-5	O76054-4;O76054-5;C9JZI9;B3KRD8;H7C417;O76054	S14L2_HUMAN	SEC14L2	SEC14-like protein 2
19.5029	18.4978	Q9NPI1;Q9NPI1-2	Q9NPI1-2;Q9NPI1	BRD7_HUMAN	BRD7	Bromodomain-containing protein 7
19.5151	20.5063	A8MXP9	A8MXP9	A8MXP9_HUMAN	MATR3	Isoform of P43243, Matrin 3
19.5205	18.3158	Q9UQR1	Q9UQR1	ZN148_HUMAN	ZNF148	Zinc finger protein 148
19.5444	18.7832	P52756	P52756	RBM5_HUMAN	RBM5	RNA-binding protein 5
19.5524	19.2534	Q96CN4-2	Q96CN4-2;M0QYX4;Q96CN4	EVI5L_HUMAN	EVI5L	Isoform of Q96CN4, Isoform 2 of EVI5-like protein
19.5666	19.4175	Q96DX7	Q96DX7	TRI44_HUMAN	TRIM44	Tripartite motif-containing protein 44
19.5698	17.004	Q9NUL5;Q9NUL5-3;Q9NUL5-4	K7EMS9;Q9NUL5-3;Q9NUL5-4;Q9NUL5	SHFL_HUMAN	SHFL	Shiftless antiviral inhibitor of ribosomal frameshifting protein
19.5889	19.4413	Q9H9A7	A0A0A0MSU3;Q9H9A7	RMI1_HUMAN	RMI1	RecQ-mediated genome instability protein 1
19.5936	18.2968	Q8TAE8	Q8TAE8	G45IP_HUMAN	GADD45GIP1	Large ribosomal subunit protein mL64
19.6016	17.6229	Q9H5Z1;Q9H5Z1-2	Q5THR1;Q9H5Z1-2;Q9H5Z1	DHX35_HUMAN	DHX35	Probable ATP-dependent RNA helicase DHX35
19.6019	17.9308	Q5VWQ0	A0A087WWP8;Q5VWQ0	RSBN1_HUMAN	RSBN1	Lysine-specific demethylase 9
19.6054	20.9005	O75379;O75379-2	O75379-2;O75379	VAMP4_HUMAN	VAMP4	Vesicle-associated membrane protein 4
19.6056	19.6793	Q6P0Q8;Q6P0Q8-2	A0A669KBJ4;Q6P0Q8-2;Q6P0Q8	MAST2_HUMAN	MAST2	Microtubule-associated serine/threonine-protein kinase 2
19.6198	18.737	Q96EY9	D6W601;C9JFC1;Q96EY9	ADAT3_HUMAN	ADAT3	Probable inactive tRNA-specific adenosine deaminase-like protein 3
19.6217	19.4874	O14653;O14653-2;O14653-3	A0A1X7SBU8;O14653-2;O14653-3;A0A1W2PPW8;A0A1W2PPP5;A0A1W2PQ06;A0A1W2PPG1;A0A1W2PQ77;A0A1W2PPG5;A0A1W2PR23;A0A1W2PQM3;A0A1W2PR02;A0A1W2PRV0;A0A1W2PS81;A0A1W2PRP7;A0A1W2PRC2;I3NI02;I3L4Z6;I3L1K7;E7EQ34;O14653	GOSR2_HUMAN	GOSR2	Golgi SNAP receptor complex member 2
19.6264	17.2511	Q8NFG4	Q8NFG4	FLCN_HUMAN	FLCN	Folliculin
19.6345	16.9751	Q86TI0;Q86TI0-2	H0YA01;H0Y8P0;C9JIE2;H7C380;H7C0Z7;A0A8V8TNS9;Q86TI0-2;Q86TI0	TBCD1_HUMAN	TBC1D1	TBC1 domain family member 1
19.6346	18.8802	Q8N1G0;Q8N1G0-2	F8WCX2;Q8N1G0-2;Q8N1G0	ZN687_HUMAN	ZNF687	Zinc finger protein 687
19.6709	19.7113	Q9HD67;Q9HD67-3	Q9HD67-3;A0A0A0MQX1;E9PEW5;Q9HD67	MYO10_HUMAN	MYO10	Unconventional myosin-X
19.6762	NaN	H7C096	H7C096	H7C096_HUMAN	BNIP2	Isoform of Q12982, BCL2 interacting protein 2
19.6763	19.2068	P05452	E9PHK0;P05452	TETN_HUMAN	CLEC3B	Tetranectin
19.6792	NaN	Q9BQ39	Q9BQ39	DDX50_HUMAN	DDX50	ATP-dependent RNA helicase DDX50
19.6876	17.6453	Q14CB8;Q14CB8-2;Q14CB8-7	Q14CB8-2;Q14CB8-3;Q14CB8-7;Q14CB8	RHG19_HUMAN	ARHGAP19	Rho GTPase-activating protein 19
19.688	19.0631	Q8WUA4	Q8WUA4-2;Q8WUA4	TF3C2_HUMAN	GTF3C2	General transcription factor 3C polypeptide 2
19.6912	18.664	P00747	P00747	PLMN_HUMAN	PLG	Plasminogen
19.6965	14.8121	Q96E29;Q96E29-2;Q96E29-3	Q96E29-2;Q96E29-3;E5RIK9;E5RIY4;Q96E29	MTEF3_HUMAN	MTERF3	Transcription termination factor 3, mitochondrial
19.7042	NaN	O43524	O43524-2;O43524	FOXO3_HUMAN	FOXO3	Forkhead box protein O3
19.7133	18.9912	Q13555-9	Q13555-9;A0A8V8TQW6;A0A8V8TQ60	KCC2G_HUMAN	CAMK2G	Isoform of Q13555, Isoform 9 of Calcium/calmodulin-dependent protein kinase type II subunit gamma
19.7207	17.3521	Q6N021;Q6N021-2;Q6N021-3	E7EPB1;E7EQS8;Q6N021-2;Q6N021-3;Q6N021	TET2_HUMAN	TET2	Methylcytosine dioxygenase TET2
19.7327	18.736	Q5T9S5;Q5T9S5-2	J3KP97;Q5T9S5-2;E9PFB9;A0A8I5KWA2;Q5T9S5	CCD18_HUMAN	CCDC18	Coiled-coil domain-containing protein 18
19.7372	18.5506	Q15283;Q15283-2	Q15283-2;Q15283	RASA2_HUMAN	RASA2	Ras GTPase-activating protein 2
19.7376	19.4879	Q5HYK7;Q5HYK7-2;Q5HYK7-3	A0A0U1RQE4;Q5HYK7-2;Q5HYK7-3;Q5HYK7-4;Q5HYK7-5;A0A494C1M0;Q5HYK7	SH319_HUMAN	SH3D19	SH3 domain-containing protein 19
19.744	19.1415	Q8WUQ7;Q8WUQ7-2	Q8WUQ7-2;Q8WUQ7	CATIN_HUMAN	CACTIN	Splicing factor Cactin
19.7449	19.1687	Q96IF1	Q96IF1	AJUBA_HUMAN	AJUBA	LIM domain-containing protein ajuba
19.7466	18.6517	Q3L8U1;Q3L8U1-2;Q3L8U1-3	H3BTW3;Q3L8U1-2;Q3L8U1-3;Q3L8U1	CHD9_HUMAN	CHD9	Chromodomain-helicase-DNA-binding protein 9
19.7598	20.1127	Q9Y3A3;Q9Y3A3-2;Q9Y3A3-3	Q9Y3A3-2;Q9Y3A3-3;S4R3N1;Q9Y3A3	PHOCN_HUMAN	MOB4	MOB-like protein phocein
19.7632	20.0851	P46821	P46821	MAP1B_HUMAN	MAP1B	Microtubule-associated protein 1B
19.7647	20.0558	O75143;O75143-2;O75143-5	H0YDR0;O75143-2;O75143-4;O75143-5;O75143	ATG13_HUMAN	ATG13	Autophagy-related protein 13
19.7657	19.6491	Q2PPJ7;Q2PPJ7-2;Q2PPJ7-3	Q2PPJ7-2;Q2PPJ7-3;H7C1F9;Q2PPJ7	RGPA2_HUMAN	RALGAPA2	Ral GTPase-activating protein subunit alpha-2
19.7686	17.8432	Q9Y546	Q9Y546	LRC42_HUMAN	LRRC42	Leucine-rich repeat-containing protein 42
19.772	18.6509	P17038;P17038-2	P17038-2;A0A0G2JQ90;A0A087WSW2;P17038	ZNF43_HUMAN	ZNF43	Zinc finger protein 43
19.7814	19.6235	Q14934;Q14934-10;Q14934-12;Q14934-13;Q14934-2;Q14934-3;Q14934-4;Q14934-5;Q14934-6;Q14934-7;Q14934-8;Q14934-9	Q14934-10;Q14934-12;Q14934-13;Q14934-19;Q14934-20;Q14934-22;Q14934-23;Q14934-2;Q14934-3;Q14934-4;Q14934-5;Q14934-6;Q14934-7;Q14934-8;Q14934-9;Q14934	NFAC4_HUMAN	NFATC4	Nuclear factor of activated T-cells, cytoplasmic 4
19.7824	19.4819	Q8IW41;Q8IW41-2	Q8IW41-2;R4GN33;Q8IW41	MAPK5_HUMAN	MAPKAPK5	MAP kinase-activated protein kinase 5
19.785	20.0682	Q6NUK4;Q6NUK4-2	A0A0U1RR85;Q6NUK4-2;Q6NUK4	REEP3_HUMAN	REEP3	Receptor expression-enhancing protein 3
19.7881	17.4443	O15164;O15164-2	O15164-2;O15164	TIF1A_HUMAN	TRIM24	Transcription intermediary factor 1-alpha
19.7889	18.3793	Q562E7;Q562E7-4	A0A0J9YXM6;I3L1G2;Q562E7-3;Q562E7-4;Q562E7	WDR81_HUMAN	WDR81	WD repeat-containing protein 81
19.7905	18.5994	Q86WP2;Q86WP2-2;Q86WP2-3	Q86WP2-3;Q86WP2-2;D4PHA4;Q86WP2	GPBP1_HUMAN	GPBP1	Vasculin
19.7963	19.1544	Q96HJ9	Q96HJ9	FMC1_HUMAN	FMC1	Protein FMC1 homolog
19.8012	19.9856	Q8WV22	H3BSL0;H3BR73;I3L1I3;Q8WV22	NSE1_HUMAN	NSMCE1	Non-structural maintenance of chromosomes element 1 homolog
19.8064	18.873	P56181-2	P56181-2	NDUV3_HUMAN	NDUFV3	Isoform of P56181, Isoform 2 of NADH dehydrogenase [ubiquinone] flavoprotein 3, mitochondrial
19.8154	19.709	D6REC4	A0A499FIZ3;D6REC4	CFA99_HUMAN	CFAP99	Cilia- and flagella-associated protein 99
19.8258	19.92	Q96EV8;Q96EV8-2	Q96EV8-2;Q96EV8	DTBP1_HUMAN	DTNBP1	Dysbindin
19.8275	18.5307	Q9Y6M7-13;Q9Y6M7-5;Q9Y6M7-6;Q9Y6M7-7;Q9Y6M7-8	Q9Y6M7-5;Q9Y6M7-6;Q9Y6M7-7;Q9Y6M7-8;H7C3C4;Q9Y6M7-13	S4A7_HUMAN	SLC4A7	Isoform of Q9Y6M7, Isoform 13 of Sodium bicarbonate cotransporter 3
19.8291	18.5964	Q5TC84	A0A3B3IRI0;Q5TC84	OGRL1_HUMAN	OGFRL1	Opioid growth factor receptor-like protein 1
19.8516	18.6762	Q9Y2R9	J3QKW2;J3QLS3;J3QQS1;Q9Y2R9	RT07_HUMAN	MRPS7	Small ribosomal subunit protein uS7m
19.8516	19.3879	O95208;O95208-2	O95208-2;O95208-3;O95208-5;E9PBC1;F6PQP6;I3L356;I3L2B2;I3L2H1;O95208	EPN2_HUMAN	EPN2	Epsin-2
19.8647	19.4155	P60033	H0YEE2;H0YDL9;H0YDJ9;A6NMH8;E9PRJ8;E9PJK1;E9PIF1;P60033	CD81_HUMAN	CD81	CD81 antigen
19.876	19.3997	Q9NWL6	C9IYZ1;U3KQP1;Q9NWL6	ASND1_HUMAN	ASNSD1	Asparagine synthetase domain-containing protein 1
19.8813	20.3556	Q8TDH9	Q8TDH9-3;Q8TDH9	BL1S5_HUMAN	BLOC1S5	Biogenesis of lysosome-related organelles complex 1 subunit 5
19.8917	19.0775	M0QY01	M0QY01	M0QY01_HUMAN	EPS15L1	Isoform of Q9UBC2, Epidermal growth factor receptor pathway substrate 15 like 1 (Fragment)
19.9111	19.6674	Q07954	Q07954	LRP1_HUMAN	LRP1	Prolow-density lipoprotein receptor-related protein 1
19.9119	20.659	Q8NHQ8;Q8NHQ8-2	Q8NHQ8-2;H0YG85;Q8NHQ8	RASF8_HUMAN	RASSF8	Ras association domain-containing protein 8
19.9253	20.698	O00767	O00767	SCD_HUMAN	SCD	Stearoyl-CoA desaturase
19.9461	19.1882	Q5MNZ9;Q5MNZ9-2	G5EA37;K7ELY0;Q5MNZ9-2;Q5MNZ9	WIPI1_HUMAN	WIPI1	WD repeat domain phosphoinositide-interacting protein 1
19.9468	18.9112	O15085;O15085-2	O15085-2;O15085	ARHGB_HUMAN	ARHGEF11	Rho guanine nucleotide exchange factor 11
19.9493	17.9757	Q9GZR2	Q9GZR2	REXO4_HUMAN	REXO4	RNA exonuclease 4
19.9618	19.3359	Q9C093;Q9C093-2	Q9C093-2;D6REZ4;A0A1B0GWD8;Q9C093	SPEF2_HUMAN	SPEF2	Sperm flagellar protein 2
19.9634	19.9554	Q9BVJ6;Q9BVJ6-3	Q9BVJ6-3;Q9BVJ6	UT14A_HUMAN	UTP14A	U3 small nucleolar RNA-associated protein 14 homolog A
19.973	19.9977	Q13627;Q13627-2;Q13627-3;Q13627-4;Q13627-5	A0A2R8Y6I6;A0A2R8Y6L5;A0A2R8Y443;Q13627-2;Q13627-3;Q13627-4;Q13627-5;A0A2R8YDF3;E7EMI5;Q13627	DYR1A_HUMAN	DYRK1A	Dual specificity tyrosine-phosphorylation-regulated kinase 1A
19.974	19.1358	Q9Y320;Q9Y320-2	Q9Y320-2;Q9Y320	TMX2_HUMAN	TMX2	Thioredoxin-related transmembrane protein 2
19.9749	18.8528	Q9UPU7;Q9UPU7-2	Q9UPU7-2;Q9UPU7	TBD2B_HUMAN	TBC1D2B	TBC1 domain family member 2B
19.9777	19.9028	Q9Y478	F5H4Y8;Q9Y478	AAKB1_HUMAN	PRKAB1	5'-AMP-activated protein kinase subunit beta-1
19.9822	20.4235	Q9BPZ7;Q9BPZ7-2;Q9BPZ7-3	Q9BPZ7-2;Q9BPZ7-3;Q9BPZ7-4;E9PGB8;B1AMA5;Q9BPZ7	SIN1_HUMAN	MAPKAP1	Target of rapamycin complex 2 subunit MAPKAP1
19.9857	19.001	Q9P209	Q9P209	CEP72_HUMAN	CEP72	Centrosomal protein of 72 kDa
19.9875	17.7907	Q99618	F8WDL1;F5GX58;Q99618	CDCA3_HUMAN	CDCA3	Cell division cycle-associated protein 3
19.9938	NaN	Q9UFF9;Q9UFF9-2;Q9UFF9-3	B7Z9U0;Q9UFF9-2;Q9UFF9-3;Q9UFF9	CNOT8_HUMAN	CNOT8	CCR4-NOT transcription complex subunit 8
19.9954	18.0283	A0A7P0Z4M5	A0A7P0Z4M5	A0A7P0Z4M5_HUMAN	CC2D1A	Isoform of Q6P1N0, Coiled-coil and C2 domain containing 1A (Fragment)
19.9971	18.9613	Q92560	F8W6N3;Q92560	BAP1_HUMAN	BAP1	Ubiquitin carboxyl-terminal hydrolase BAP1
19.9978	17.1183	O94880	O94880-1;O94880	PHF14_HUMAN	PHF14	PHD finger protein 14
20.0046	18.8584	Q13506	Q13506	NAB1_HUMAN	NAB1	NGFI-A-binding protein 1
20.0054	NaN	O00716;O00716-2	O00716-2;O00716	E2F3_HUMAN	E2F3	Transcription factor E2F3
20.0067	19.0569	P98196	H0Y547;E9PEJ6;P98196	AT11A_HUMAN	ATP11A	Phospholipid-transporting ATPase IH
20.0081	19.9781	Q5SW79-2	H0YB92;Q5SW79-2;Q5SW79-3	CE170_HUMAN	CEP170	Isoform of Q5SW79, Isoform 2 of Centrosomal protein of 170 kDa
20.0112	19.9121	Q5T5U3	A0A805TBS0;Q5JSD8;A0A1B0GV73;A0A1B0GTZ9;H0Y468;A0A7P0TAS2;A0A087WW76;Q5T5U3	RHG21_HUMAN	ARHGAP21	Rho GTPase-activating protein 21
20.0141	18.724	Q8N302	A0A2R8YFF1;Q8N302	AGGF1_HUMAN	AGGF1	Angiogenic factor with G patch and FHA domains 1
20.0171	18.9777	Q12955-6	Q12955-4;Q12955-6;Q12955-7;Q12955-5;H0Y9E9;H0Y951;H0Y3A4;A0A087WTF3;A0A087WY90;A0A087WZ65;Q12955	ANK3_HUMAN	ANK3	Isoform of Q12955, Isoform 4 of Ankyrin-3
20.0203	18.7587	Q9NVV4	Q9NVV4-2;Q9NVV4	PAPD1_HUMAN	MTPAP	Poly(A) RNA polymerase, mitochondrial
20.028	18.9542	Q96EY1;Q96EY1-2	Q96EY1-2;Q96EY1	DNJA3_HUMAN	DNAJA3	DnaJ homolog subfamily A member 3, mitochondrial
20.0328	20.747	Q5JPI3;Q5JPI3-2	Q5JPI3-2;Q5JPI3	CC038_HUMAN	C3orf38	Uncharacterized protein C3orf38
20.0388	18.6815	Q9BVV6;Q9BVV6-2;Q9BVV6-3;Q9BVV6-4	Q9BVV6-2;Q9BVV6-3;Q9BVV6-4;A0A494C0Z1;A0A494C171;A0A494C0M8;A0A494C075;A0A087WYM5;Q9BVV6	TALD3_HUMAN	KIAA0586	Protein TALPID3
20.046	17.0128	P56937;P56937-2;P56937-3	P56937-2;P56937-3;P56937	DHB7_HUMAN	HSD17B7	3-keto-steroid reductase/17-beta-hydroxysteroid dehydrogenase 7
20.0691	19.5316	Q9BZK3	Q9BZK3	NACP4_HUMAN	NACA4P	Putative nascent polypeptide-associated complex subunit alpha-like protein
20.0698	19.3788	Q5VT66;Q5VT66-2;Q5VT66-3	Q5VT66-2;Q5VT66-3;H7BYZ9;A0A8Q3SHL7;A0A8Q3SHG3;Q5VT66	MARC1_HUMAN	MTARC1	Mitochondrial amidoxime-reducing component 1
20.078	20.7724	O75352;O75352-2	J3KSI4;J3KT75;O75352-2;I3L4E0;I3L295;I3L1D2;J3QRD5;J3QS48;J3QW43;O75352	MPU1_HUMAN	MPDU1	Mannose-P-dolichol utilization defect 1 protein
20.0916	18.3413	Q86WA6;Q86WA6-2	Q86WA6-2;Q86WA6	BPHL_HUMAN	BPHL	Valacyclovir hydrolase
20.0983	19.3157	A0A024R4E5;C9J5E5;C9JBS3;C9JEJ8;C9JES8;C9JHN6;C9JHS7;C9JHZ8;C9JIZ1;C9JK79;C9JT62;C9JZI8	C9J5E5;C9JZI8;C9JT62;C9JK79;C9JIZ1;C9JHS7;C9JHN6;C9JHZ8;C9JBS3;C9JEJ8;C9JES8;A0A024R4E5	A0A024R4E5_HUMAN;C9J5E5_HUMAN;C9JBS3_HUMAN;C9JEJ8_HUMAN;C9JES8_HUMAN;C9JHN6_HUMAN;C9JHS7_HUMAN;C9JHZ8_HUMAN;C9JIZ1_HUMAN;C9JK79_HUMAN;C9JT62_HUMAN;C9JZI8_HUMAN	HDLBP	Isoform of Q00341, High density lipoprotein binding protein
20.1001	18.8327	Q5T280	Q5T280	CI114_HUMAN	SPOUT1	Putative methyltransferase C9orf114
20.1245	NaN	Q9BTC8;Q9BTC8-2	E7EV10;E7EQY4;F6RRE2;Q9BTC8-2;Q9BTC8	MTA3_HUMAN	MTA3	Metastasis-associated protein MTA3
20.1343	18.1472	Q9C035;Q9C035-2;Q9C035-3;Q9C035-4	Q9C035-2;Q9C035-3;Q9C035-4;Q9C035	TRIM5_HUMAN	TRIM5	Tripartite motif-containing protein 5
20.1594	16.0839	Q96SB3	Q96SB3	NEB2_HUMAN	PPP1R9B	Neurabin-2
20.1636	20.1348	O14972;O14972-2	A8MTY9;O14972-2;O14972	VP26C_HUMAN	VPS26C	Vacuolar protein sorting-associated protein 26C
20.1679	20.6944	Q6P4E1;Q6P4E1-2;Q6P4E1-5	H0YMR0;H0YM51;Q6P4E1-2;Q6P4E1-5;A0A3B3IRW9;Q6P4E1	GOLM2_HUMAN	GOLM2	Protein GOLM2
20.1681	19.657	A0A140TA76;K7EMZ9	A0A140TA76;K7EMZ9	A0A140TA76_HUMAN;K7EMZ9_HUMAN	LSM14A	Isoform of Q8ND56, Protein LSM14 homolog A (Fragment)
20.1685	18.0176	Q8IZE3-2	Q8IZE3-2;X6RHX1;Q8IZE3	PACE1_HUMAN	SCYL3	Isoform of Q8IZE3, Isoform 2 of Protein-associating with the carboxyl-terminal domain of ezrin
20.172	19.9487	Q7Z3B4;Q7Z3B4-2;Q7Z3B4-3	Q7Z3B4-2;Q7Z3B4-3;A0A8Q3WLY5;A0A8Q3WLP2;A0A8Q3WKJ4;A0A8Q3WKK2;A0A8Q3WKP8;A0A8Q3WL42;A0A8Q3SHX2;A0A8Z5F6C8;Q7Z3B4	NUP54_HUMAN	NUP54	Nucleoporin p54
20.1729	18.4522	O94832	J3KRL0;K7EIG7;J3QRN6;O94832	MYO1D_HUMAN	MYO1D	Unconventional myosin-Id
20.1795	20.8333	Q9P2D0;Q9P2D0-2	E7EPI0;Q9P2D0-2;Q9P2D0	IBTK_HUMAN	IBTK	Inhibitor of Bruton tyrosine kinase
20.184	19.6364	Q9Y450-2	Q9Y450-2	HBS1L_HUMAN	HBS1L	Isoform of Q9Y450, Isoform 2 of HBS1-like protein
20.1849	19.5238	A0A499FI48;C9JMN9	C9JMN9;A0A499FI48	A0A499FI48_HUMAN;C9JMN9_HUMAN	PDIA4	Isoform of P13667, Protein disulfide-isomerase
20.1978	19.1426	Q5T3I0;Q5T3I0-3	E9PAV9;F8W895;A0A0A0MRK1;Q5T3I0-3;E9PPY4;F2Z3C6;Q5T3I0	GPTC4_HUMAN	GPATCH4	G patch domain-containing protein 4
20.2003	20.0269	Q9H0J9	G5E9U9;Q9H0J9	PAR12_HUMAN	PARP12	Protein mono-ADP-ribosyltransferase PARP12
20.2013	19.7419	Q5SY16	Q5SY16	NOL9_HUMAN	NOL9	Polynucleotide 5'-hydroxyl-kinase NOL9
20.2168	NaN	Q9H6S1	Q9H6S1	AZI2_HUMAN	AZI2	5-azacytidine-induced protein 2
20.2213	19.807	O43251-6;O43251-8	O43251-6;O43251-8;A0A8Q3WKT3	RFOX2_HUMAN	RBFOX2	Isoform of O43251, Isoform 6 of RNA binding protein fox-1 homolog 2
20.2333	18.4071	O43310-2	O43310-2	CTIF_HUMAN	CTIF	Isoform of O43310, Isoform 2 of CBP80/20-dependent translation initiation factor
20.2404	19.3571	P55081	P55081	MFAP1_HUMAN	MFAP1	Microfibrillar-associated protein 1
20.2435	19.3151	Q9BUV8;Q9BUV8-2;Q9BUV8-3;Q9BUV8-4;Q9BUV8-5	Q9BUV8-2;Q9BUV8-3;Q9BUV8-4;Q9BUV8-5;Q9BUV8	RCAF1_HUMAN	RAB5IF	GEL complex subunit OPTI
20.2456	NaN	O60739	O60739	EIF1B_HUMAN	EIF1B	Eukaryotic translation initiation factor 1b
20.2458	19.5505	Q9BV73;Q9BV73-2	H7C0P0;Q9BV73-2;Q9BV73	CP250_HUMAN	CEP250	Centrosome-associated protein CEP250
20.2475	19.2917	P23434	H3BUH9;A0A1W2PQV2;P23434	GCSH_HUMAN	GCSH	Glycine cleavage system H protein, mitochondrial
20.2621	18.9524	Q9ULU4;Q9ULU4-10;Q9ULU4-11;Q9ULU4-12;Q9ULU4-13;Q9ULU4-14;Q9ULU4-16;Q9ULU4-17;Q9ULU4-19;Q9ULU4-20;Q9ULU4-21;Q9ULU4-22;Q9ULU4-23;Q9ULU4-5;Q9ULU4-7;Q9ULU4-8;Q9ULU4-9	Q9ULU4-20;Q9ULU4-21;Q9ULU4-22;Q9ULU4-23;Q9ULU4-12;Q9ULU4-13;Q9ULU4-14;Q9ULU4-10;Q9ULU4-11;Q9ULU4-16;Q9ULU4-17;Q9ULU4-19;Q9ULU4-3;Q9ULU4-4;Q9ULU4-5;Q9ULU4-6;Q9ULU4-7;Q9ULU4-8;Q9ULU4-9;H7C4X9;A0A087WV57;A0A087WVZ6;A0A087WYS3;Q9ULU4	ZMYD8_HUMAN	ZMYND8	MYND-type zinc finger-containing chromatin reader ZMYND8
20.2689	19.0826	Q9Y3B7;Q9Y3B7-2;Q9Y3B7-3	E9PQB6;Q9Y3B7-2;Q9Y3B7-3;Q9Y3B7	RM11_HUMAN	MRPL11	Large ribosomal subunit protein uL11m
20.2705	19.2955	Q8WXB1	H7BXH9;Q8WXB1	MT21A_HUMAN	METTL21A	Protein N-lysine methyltransferase METTL21A
20.2712	19.6139	Q13670	Q13670	PM2PB_HUMAN	PMS2P11	Putative postmeiotic segregation increased 2-like protein 11
20.2759	20.0104	Q9H7S9	Q9H7S9	ZN703_HUMAN	ZNF703	Zinc finger protein 703
20.282	19.2233	O95568	Q5TI78;O95568	MET18_HUMAN	METTL18	Histidine protein methyltransferase 1 homolog
20.2824	19.4395	A0A0A0MRR3	A0A0A0MRR3	A0A0A0MRR3_HUMAN	TAF8	Isoform of Q7Z7C8, Transcription initiation factor TFIID subunit 8
20.2929	NaN	Q9BXF6	A0A1B0GTL5;Q9BXF6	RFIP5_HUMAN	RAB11FIP5	Rab11 family-interacting protein 5
20.3077	22.4514	Q8TCX1;Q8TCX1-2;Q8TCX1-3	Q8TCX1-2;Q8TCX1-3;H7BYC8;Q8TCX1	DC2L1_HUMAN	DYNC2LI1	Cytoplasmic dynein 2 light intermediate chain 1
20.316	21.3463	Q8TEV9;Q8TEV9-2	Q8TEV9-2;Q8TEV9	SMCR8_HUMAN	SMCR8	Guanine nucleotide exchange protein SMCR8
20.3182	18.229	O75381;O75381-2	O75381-2;O75381	PEX14_HUMAN	PEX14	Peroxisomal membrane protein PEX14
20.3286	19.8803	Q99808;Q99808-2	Q99808-2;Q99808	S29A1_HUMAN	SLC29A1	Equilibrative nucleoside transporter 1
20.3466	20.0561	Q9UKG9;Q9UKG9-3	C9J3D7;Q9UKG9-3;Q9UKG9	OCTC_HUMAN	CROT	Peroxisomal carnitine O-octanoyltransferase
20.3487	19.1397	O43829	J3QLI2;O43829	ZBT14_HUMAN	ZBTB14	Zinc finger and BTB domain-containing protein 14
20.3497	19.8262	Q5D1E8	A0A1W2PQC8;Q5D1E8	ZC12A_HUMAN	ZC3H12A	Endoribonuclease ZC3H12A
20.3522	19.9805	Q93073;Q93073-2	Q93073-2;Q93073	SBP2L_HUMAN	SECISBP2L	Selenocysteine insertion sequence-binding protein 2-like
20.3532	19.762	Q68BL7;Q68BL7-2	Q5JTM7;Q68BL7-2;Q68BL7	OLM2A_HUMAN	OLFML2A	Olfactomedin-like protein 2A
20.3657	19.2187	Q9NZJ6	F6WGP0;Q9NZJ6	COQ3_HUMAN	COQ3	Ubiquinone biosynthesis O-methyltransferase, mitochondrial
20.3678	18.9225	Q8NB14;Q8NB14-2	A0A804HIT0;Q8NB14-2;Q8NB14	UBP38_HUMAN	USP38	Ubiquitin carboxyl-terminal hydrolase 38
20.368	19.4164	Q86W92-2	Q86W92-2	LIPB1_HUMAN	PPFIBP1	Isoform of Q86W92, Isoform 2 of Liprin-beta-1
20.3691	18.7891	Q9Y6X4	D6RB01;Q9Y6X4	F169A_HUMAN	FAM169A	Soluble lamin-associated protein of 75 kDa
20.3743	21.1227	P56277	P56277	CMC4_HUMAN	CMC4	Cx9C motif-containing protein 4
20.3749	19.3459	Q8IWP9	B4DUJ5;Q8IWP9	CC28A_HUMAN	CCDC28A	Coiled-coil domain-containing protein 28A
20.3788	NaN	Q9Y5J6	F2Z2B0;Q9Y5J6	T10B_HUMAN	TIMM10B	Mitochondrial import inner membrane translocase subunit Tim10 B
20.3796	19.2353	Q9NXF1;Q9NXF1-2	Q9NXF1-2;Q9NXF1	TEX10_HUMAN	TEX10	Testis-expressed protein 10
20.3821	20.2686	Q13137;Q13137-3;Q13137-4;Q13137-5	Q13137-3;Q13137-4;Q13137-5;D6RJE7;D6RF70;D6REB0;Q13137	CACO2_HUMAN	CALCOCO2	Calcium-binding and coiled-coil domain-containing protein 2
20.3836	19.588	Q9NSY1	H0Y9P1;Q9NSY1	BMP2K_HUMAN	BMP2K	BMP-2-inducible protein kinase
20.3902	23.1048	Q5JTW2;Q5JTW2-2;Q5JTW2-3;Q5JTW2-5	A8MST6;A0A2R8Y7U5;A0A2R8Y7A4;Q5JTW2-2;Q5JTW2-3;Q5JTW2-5;A0A2R8Y432;A0A2R8Y5W6;A0A2R8Y589;A0A2R8YCP0;A0A2U3TZI9;Q5JTW2	CEP78_HUMAN	CEP78	Centrosomal protein of 78 kDa
20.3935	19.541	Q96L93;Q96L93-2;Q96L93-4;Q96L93-6	Q96L93-2;Q96L93-4;Q96L93-5;Q96L93-6;Q96L93	KI16B_HUMAN	KIF16B	Kinesin-like protein KIF16B
20.4014	19.2124	P37275;P37275-2;P37275-3;P37275-4;P37275-5	P37275-2;P37275-3;P37275-4;P37275-5;P37275	ZEB1_HUMAN	ZEB1	Zinc finger E-box-binding homeobox 1
20.4049	20.1902	Q15061	Q15061	WDR43_HUMAN	WDR43	WD repeat-containing protein 43
20.4109	20.9055	C9J7I0	C9J7I0	UMAD1_HUMAN	UMAD1	UBAP1-MVB12-associated (UMA)-domain containing protein 1
20.4141	19.2451	Q8IVF6	Q8IVF6-2;A0A1B0GTQ5;A0A1B0GW59;R4GNB3;R4GN29;A0A8V8TRI7;A0A8V8TQR3;A0A8V8TQ86;A2A300;A0A8I5KZ96;Q8IVF6;A2A2Z9	AN18A_HUMAN	ANKRD18A	Ankyrin repeat domain-containing protein 18A
20.4186	NaN	Q9BTX7	Q9BTX7	TTPAL_HUMAN	TTPAL	Alpha-tocopherol transfer protein-like
20.4277	18.6534	Q8N4T8;Q8N4T8-2	H0Y962;Q8N4T8-2;Q8N4T8	CBR4_HUMAN	CBR4	3-oxoacyl-[acyl-carrier-protein] reductase
20.4313	22.3291	P46734	P46734-2;P46734-3;P46734	MP2K3_HUMAN	MAP2K3	Dual specificity mitogen-activated protein kinase kinase 3
20.44	18.9298	Q96ES7	Q96ES7	SGF29_HUMAN	SGF29	SAGA-associated factor 29
20.4405	19.597	Q10472	K7EJV8;Q10472	GALT1_HUMAN	GALNT1	Polypeptide N-acetylgalactosaminyltransferase 1
20.4408	19.6811	Q9H7P9;Q9H7P9-3	E7ESZ3;H7BXC7;Q9H7P9-3;Q9H7P9	PKHG2_HUMAN	PLEKHG2	Pleckstrin homology domain-containing family G member 2
20.445	NaN	Q9BXU9;Q9BXU9-1	A0A0A0MSB7;Q9BXU9-1;Q9BXU9	CABP8_HUMAN	CALN1	Calcium-binding protein 8
20.4514	21.0628	Q9BZV1;Q9BZV1-2	Q9BZV1-2;K7EP32;Q9BZV1	UBXN6_HUMAN	UBXN6	UBX domain-containing protein 6
20.4611	21.9277	Q96BH1	Q96BH1	RNF25_HUMAN	RNF25	E3 ubiquitin-protein ligase RNF25
20.4628	18.8666	Q13601	Q13601	KRR1_HUMAN	KRR1	KRR1 small subunit processome component homolog
20.4643	19.6598	Q9NV06	A0A087X1F8;A0A087WT20;Q9NV06	DCA13_HUMAN	DCAF13	DDB1- and CUL4-associated factor 13
20.4958	19.3548	Q8N4S0;Q8N4S0-2	A0A2R8Y7C3;A0A2R8Y4L3;A0A2R8YE98;A0A7P0T8E7;A0A7P0T881;A0A7P0TAG3;Q8N4S0-2;F5H777;Q8N4S0	CCD82_HUMAN	CCDC82	Coiled-coil domain-containing protein 82
20.4965	20.1371	P42336	A0A2R8Y2F6;A0A6Q8PGN9;C9JAM9;P42336	PK3CA_HUMAN	PIK3CA	Phosphatidylinositol 4,5-bisphosphate 3-kinase catalytic subunit alpha isoform
20.5101	20.5201	Q92503;Q92503-2;Q92503-3	K7EJ08;Q92503-2;Q92503-3;K7EPE4;Q92503	S14L1_HUMAN	SEC14L1	SEC14-like protein 1
20.515	20.1301	Q9H7B2	Q5VXM9;Q5VXN0;U3KQN5;Q9H7B2	RPF2_HUMAN	RPF2	Ribosome production factor 2 homolog
20.5167	19.4878	Q9P107;Q9P107-2	Q9P107-2;Q9P107	GMIP_HUMAN	GMIP	GEM-interacting protein
20.5191	20.7252	Q6NYC8	Q6NYC8-3;A0A0G2JHC2;Q6NYC8	PPR18_HUMAN	PPP1R18	Phostensin
20.5243	19.7552	Q8N5U6;Q8N5U6-2	Q8N5U6-2;H0YFN9;H0YF69;F5H510;Q8N5U6	RNF10_HUMAN	RNF10	E3 ubiquitin-protein ligase RNF10
20.5265	19.605	Q9NRW1;Q9NRW1-2	Q9NRW1-2;J3KR73;Q9NRW1	RAB6B_HUMAN	RAB6B	Ras-related protein Rab-6B
20.5271	19.7716	O95619	F8W0J4;O95619	YETS4_HUMAN	YEATS4	YEATS domain-containing protein 4
20.5297	20.4458	Q9H4L5;Q9H4L5-2;Q9H4L5-5;Q9H4L5-6	C9JZ19;Q9H4L5-2;Q9H4L5-3;Q9H4L5-4;Q9H4L5-5;Q9H4L5-6;Q9H4L5-7;Q9H4L5-8;Q9H4L5	OSBL3_HUMAN	OSBPL3	Oxysterol-binding protein-related protein 3
20.5339	NaN	Q9H5H4	H3BS42;Q9H5H4	ZN768_HUMAN	ZNF768	Zinc finger protein 768
20.5421	20.0791	Q9H0R8;Q9H0R8-2	F5GZY7;Q9H0R8-2;Q9H0R8	GBRL1_HUMAN	GABARAPL1	Gamma-aminobutyric acid receptor-associated protein-like 1
20.5422	16.9781	P55199	U3KQ90;P55199	ELL_HUMAN	ELL	RNA polymerase II elongation factor ELL
20.5431	18.7563	P0DJ07	A0A0A0MSK2;A0A8V8TLP9;P0DJ07	PT100_HUMAN	PET100	Protein PET100 homolog, mitochondrial
20.5477	20.3255	O75030-12;O75030-2;O75030-4;O75030-6;O75030-8	O75030-2;O75030-4;O75030-6;O75030-8;O75030-10;O75030-11;O75030-12;A0A8I5KRZ6;A0A8I5KTU3;A0A8I5KSZ4	MITF_HUMAN	MITF	Isoform of O75030, Isoform 12 of Microphthalmia-associated transcription factor
20.5528	20.4701	P27701;P27701-2	P27701-2;P27701	CD82_HUMAN	CD82	CD82 antigen
20.5576	19.4013	Q14687;Q14687-2;Q14687-3	H0Y613;Q14687-2;Q14687-3;Q14687	GSE1_HUMAN	GSE1	Genetic suppressor element 1
20.559	21.8586	P11166	P11166	GTR1_HUMAN	SLC2A1	Solute carrier family 2, facilitated glucose transporter member 1
20.5602	18.4913	P23229;P23229-2;P23229-3;P23229-4;P23229-5;P23229-6;P23229-7;P23229-9	P23229-2;P23229-3;P23229-4;P23229-5;P23229-6;P23229-7;P23229-9;A0A8C8KBL6;P23229	ITA6_HUMAN	ITGA6	Integrin alpha-6
20.5613	18.893	Q96PY5;Q96PY5-3	C9IZY8;Q8IVF7-2;Q8IVF7-3;Q96PY5-3;F8W1F5;Q8IVF7;Q96PY5	FMNL2_HUMAN	FMNL2	Formin-like protein 2
20.5637	31.2966	O60239;O60239-2	O60239-2;O60239	3BP5_HUMAN	SH3BP5	SH3 domain-binding protein 5
20.57	18.8462	Q9NTJ5	F8WCQ2;A0A5F9ZHN7;Q9NTJ5	SAC1_HUMAN	SACM1L	Phosphatidylinositol-3-phosphatase SAC1
20.5703	21.6282	Q96RS0	Q96RS0	TGS1_HUMAN	TGS1	Trimethylguanosine synthase
20.5755	20.3342	O75844	O75844	FACE1_HUMAN	ZMPSTE24	CAAX prenyl protease 1 homolog
20.5822	18.3344	Q96SB8	Q96SB8-2;C9JMN1;A0A0A0MRY1;Q96SB8	SMC6_HUMAN	SMC6	Structural maintenance of chromosomes protein 6
20.6009	20.2165	Q86VP1;Q86VP1-2;Q86VP1-3;Q86VP1-4	Q86VP1-2;Q86VP1-3;Q86VP1-4;B8ZZD4;H7C3L5;Q86VP1	TAXB1_HUMAN	TAX1BP1	Tax1-binding protein 1
20.608	21.2815	Q6ZNJ1;Q6ZNJ1-2;Q6ZNJ1-3	H0Y764;H7C3Y7;A0A494C1V1;Q6ZNJ1-2;Q6ZNJ1-3;Q6ZNJ1	NBEL2_HUMAN	NBEAL2	Neurobeachin-like protein 2
20.6086	17.7731	Q9H0R6	X6R772;Q9H0R6-2;Q9H0R6	GATA_HUMAN	QRSL1	Glutamyl-tRNA(Gln) amidotransferase subunit A, mitochondrial
20.6109	20.036	Q8NAV1	Q8NAV1	PR38A_HUMAN	PRPF38A	Pre-mRNA-splicing factor 38A
20.6118	20.4623	Q7L8J4;Q7L8J4-2	Q7L8J4-2;Q7L8J4	3BP5L_HUMAN	SH3BP5L	SH3 domain-binding protein 5-like
20.6171	19.7277	Q68DH5	Q68DH5	LMBD2_HUMAN	LMBRD2	G-protein coupled receptor-associated protein LMBRD2
20.621	20.4317	Q8IYU8	Q8IYU8	MICU2_HUMAN	MICU2	Calcium uptake protein 2, mitochondrial
20.625	19.1511	O75920-2	O75920-2;E5RIQ9	SERF1_HUMAN	SERF1B	Isoform of O75920, Isoform Short of Small EDRK-rich factor 1
20.6267	20.0631	Q9NZC9	C9J6I8;C9J8F8;C9JP32;C9JS37;A0A8V8TMS6;A0A8V8TLB3;A0A8V8TLD4;Q9NZC9	SMAL1_HUMAN	SMARCAL1	SWI/SNF-related matrix-associated actin-dependent regulator of chromatin subfamily A-like protein 1
20.6295	20.508	O14639;O14639-2;O14639-3;O14639-4;O14639-5	F8W8M4;A0A3B3IS55;O14639-2;O14639-3;O14639-4;O14639-5;O14639-6;O14639	ABLM1_HUMAN	ABLIM1	Actin-binding LIM protein 1
20.6305	20.4694	Q9NQ89	F5GXX6;F5H744;F5H271;Q9NQ89	CL004_HUMAN	C12orf4	Protein C12orf4
20.6315	17.8081	Q96BN2	Q96BN2	TADA1_HUMAN	TADA1	Transcriptional adapter 1
20.6545	19.4171	Q96LB3;Q96LB3-2	Q96LB3-2;Q96LB3	IFT74_HUMAN	IFT74	Intraflagellar transport protein 74 homolog
20.6618	20.4876	P57088	D6RAA6;H0Y8N0;P57088	TMM33_HUMAN	TMEM33	Transmembrane protein 33
20.6672	21.3738	Q99442	F8WF48;F8WCJ7;Q99442	SEC62_HUMAN	SEC62	Translocation protein SEC62
20.6805	19.6538	A0A494C039	A0A494C039	A0A494C039_HUMAN	HYOU1	Isoform of Q9Y4L1, Hypoxia up-regulated 1
20.6812	18.7552	Q9H875;Q9H875-2	Q9H875-2;Q9H875	PKRI1_HUMAN	PRKRIP1	PRKR-interacting protein 1
20.6823	NaN	O00221	Q7LC14;O00221	IKBE_HUMAN	NFKBIE	NF-kappa-B inhibitor epsilon
20.6839	18.297	Q9NQC7;Q9NQC7-2	J3KRR7;H3BS09;Q9NQC7-2;J3QKR2;Q9NQC7	CYLD_HUMAN	CYLD	Ubiquitin carboxyl-terminal hydrolase CYLD
20.6873	19.0352	Q9Y4F5;Q9Y4F5-2;Q9Y4F5-3	Q9Y4F5-2;Q9Y4F5-3;Q9Y4F5	C170B_HUMAN	CEP170B	Centrosomal protein of 170 kDa protein B
20.6884	19.8496	Q7Z2K8	Q7Z2K8-2;Q7Z2K8	GRIN1_HUMAN	GPRIN1	G protein-regulated inducer of neurite outgrowth 1
20.6886	20.1699	O43572	E7EMD6;O43572	AKA10_HUMAN	AKAP10	A-kinase anchor protein 10, mitochondrial
20.6895	18.2601	Q9NQY0	E5RHU4;Q9NQY0	BIN3_HUMAN	BIN3	Bridging integrator 3
20.6912	19.9441	Q13510;Q13510-2	A0A1B0GUW4;A0A1B0GV06;A0A1B0GUE3;A0A1B0GUG1;A0A1B0GUH5;A0A1B0GTZ5;A0A1B0GUA4;A0A1B0GTM3;A0A1B0GTP7;A0A1B0GW68;E7EMM4;Q13510-2;Q13510-3;Q13510	ASAH1_HUMAN	ASAH1	Acid ceramidase
20.6925	19.0182	Q99547	H3BSB3;H3BNT4;Q99547	MPH6_HUMAN	MPHOSPH6	M-phase phosphoprotein 6
20.6969	19.6064	Q969R5	H0Y5M2;Q969R5-2;Q969R5-3;Q969R5	LMBL2_HUMAN	L3MBTL2	Lethal(3)malignant brain tumor-like protein 2
20.699	19.9574	O95379	O95379	TFIP8_HUMAN	TNFAIP8	Tumor necrosis factor alpha-induced protein 8
20.7084	19.8562	Q9UHF7;Q9UHF7-2;Q9UHF7-3	Q9UHF7-2;Q9UHF7-3;E5RFF3;Q9UHF7	TRPS1_HUMAN	TRPS1	Zinc finger transcription factor Trps1
20.7137	20.1217	O00273-2	O00273-2	DFFA_HUMAN	DFFA	Isoform of O00273, Isoform DFF35 of DNA fragmentation factor subunit alpha
20.7219	17.7983	Q9NS91	C9J0Q4;F8WE49;Q9NS91	RAD18_HUMAN	RAD18	E3 ubiquitin-protein ligase RAD18
20.7356	19.8269	Q9UPT9;Q9UPT9-2	Q9UPT9-2;Q9UPT9	UBP22_HUMAN	USP22	Ubiquitin carboxyl-terminal hydrolase 22
20.7439	18.2711	Q15051;Q15051-2;Q15051-3	C9JVC4;Q15051-2;Q15051-3;Q15051	IQCB1_HUMAN	IQCB1	IQ calmodulin-binding motif-containing protein 1
20.7458	20.8381	P04424;P04424-2;P04424-3	F8W943;A0A5F9ZHM8;A0A5F9ZHC6;P04424-2;P04424-3;P04424	ARLY_HUMAN	ASL	Argininosuccinate lyase
20.7471	NaN	O15182	E5RJF8;E5RK82;O15182	CETN3_HUMAN	CETN3	Centrin-3
20.7475	20.354	Q69YQ0;Q69YQ0-2	C9J8U1;A0A494C1J1;Q69YQ0-2;F8WAN1;Q69YQ0	CYTSA_HUMAN	SPECC1L	Cytospin-A
20.7523	17.0297	Q9H040	Q9H040	SPRTN_HUMAN	SPRTN	DNA-dependent metalloprotease SPRTN
20.7606	20.0109	Q8TBZ6	D6R954;X6REK4;Q8TBZ6	TM10A_HUMAN	TRMT10A	tRNA methyltransferase 10 homolog A
20.7631	18.9707	Q15723-2;Q15723-3	Q15723-1;Q15723-2;Q15723-3;Q15723	ELF2_HUMAN	ELF2	Isoform of Q15723, Isoform 2 of ETS-related transcription factor Elf-2
20.7652	20.651	Q14766;Q14766-2;Q14766-3;Q14766-4;Q14766-5	E7EV71;Q14766-2;Q14766-3;Q14766-4;Q14766-5;C9JD84;H7C0I7;Q14766	LTBP1_HUMAN	LTBP1	Latent-transforming growth factor beta-binding protein 1
20.7699	NaN	Q9BYM8;Q9BYM8-3;Q9BYM8-4	Q9BYM8-3;Q9BYM8-4;B4DML5;H0Y4S7;A0A8V8TMZ2;A0A8V8TMQ4;G3XAG9;Q9BYM8	HOIL1_HUMAN	RBCK1	RanBP-type and C3HC4-type zinc finger-containing protein 1
20.7728	20.6351	Q9Y4I1;Q9Y4I1-2;Q9Y4I1-3	Q9Y4I1-2;Q9Y4I1-3;A0A8I5QJE6;A0A8I5QKR9;A0A8I5QKS7;E7ERV5;F8WE88;G3V394;A0A8J8YWI7;A0A8I5KV14;A0A8I5KTF1;A0A8I5KWE1;A0A8I5KX10;A0A8I5KYM3;Q9Y4I1	MYO5A_HUMAN	MYO5A	Unconventional myosin-Va
20.7775	21.9292	Q8WXE1;Q8WXE1-2	A0A0U1RQW3;A0A0U1RQR9;A0A0U1RRM7;A0A1W2PQ89;Q8WXE1-2;Q8WXE1-3;Q8WXE1	ATRIP_HUMAN	ATRIP	ATR-interacting protein
20.7828	20.2405	O95926	O95926	SYF2_HUMAN	SYF2	Pre-mRNA-splicing factor SYF2
20.7832	20.1974	O75420	O75420	GGYF1_HUMAN	GIGYF1	GRB10-interacting GYF protein 1
20.7832	19.3797	Q8NHG7	Q8NHG7	SVIP_HUMAN	SVIP	Small VCP/p97-interacting protein
20.7902	19.1449	Q9Y421;Q9Y421-2	K7EIY1;K7ELZ8;K7ENN5;Q9Y421-2;Q9Y421-3;Q9Y421	FA32A_HUMAN	FAM32A	Protein FAM32A
20.799	21.2159	Q7Z7A4;Q7Z7A4-2;Q7Z7A4-4;Q7Z7A4-5;Q7Z7A4-6;Q7Z7A4-7	H7BYG4;E9PD56;W5RWE6;Q7Z7A4-2;Q7Z7A4-4;Q7Z7A4-5;Q7Z7A4-6;Q7Z7A4-7;A0A0C4DG95;Q7Z7A4	PXK_HUMAN	PXK	PX domain-containing protein kinase-like protein
20.8056	20.0123	D6RC37	D6RC37	D6RC37_HUMAN	SUB1	Isoform of P53999, SUB1 regulator of transcription (Fragment)
20.8058	20.0266	P63146	H0Y9V2;P63146	UBE2B_HUMAN	UBE2B	Ubiquitin-conjugating enzyme E2 B
20.8065	20.431	P46939;P46939-2	Q5T097;H0Y337;P46939-2;P46939-4;P46939	UTRN_HUMAN	UTRN	Utrophin
20.8244	18.213	Q93074;Q93074-2;Q93074-3	A0A8I5QJW8;A0A8I5QJK7;A0A0A0MR79;Q93074-2;Q93074-3;A0A8I5KSA4;A0A8I5KQY2;A0A8I5KUR0;A0A8I5KW86;A0A8I5KVA6;A0A8I5KXK9;Q93074	MED12_HUMAN	MED12	Mediator of RNA polymerase II transcription subunit 12
20.8277	20.0412	Q9P2E3	Q9P2E3	ZNFX1_HUMAN	ZNFX1	NFX1-type zinc finger-containing protein 1
20.8381	20.4275	O60279	O60279	SUSD5_HUMAN	SUSD5	Sushi domain-containing protein 5
20.8503	21.3519	Q8N2Z9	Q8N2Z9-2;A0A087WT10;Q8N2Z9	CENPS_HUMAN	CENPS	Centromere protein S
20.8524	21.3721	Q9UKK3	Q9UKK3	PARP4_HUMAN	PARP4	Protein mono-ADP-ribosyltransferase PARP4
20.856	18.9834	P42356	P42356	PI4KA_HUMAN	PI4KA	Phosphatidylinositol 4-kinase alpha
20.8567	20.1311	Q8TAQ2-2;Q8TAQ2-3	F8VXC8;Q8TAQ2-2;Q8TAQ2-3	SMRC2_HUMAN	SMARCC2	Isoform of Q8TAQ2, Isoform 2 of SWI/SNF complex subunit SMARCC2
20.8584	20.115	Q92805	Q92805	GOGA1_HUMAN	GOLGA1	Golgin subfamily A member 1
20.8586	19.61	Q8NAF0	Q8NAF0	ZN579_HUMAN	ZNF579	Zinc finger protein 579
20.8744	20.5712	Q9Y592	H0YHH5;Q9Y592	CEP83_HUMAN	CEP83	Centrosomal protein of 83 kDa
20.8756	18.4214	Q9P0N9;Q9P0N9-2;Q9P0N9-3;Q9P0N9-4	Q9P0N9-2;Q9P0N9-3;Q9P0N9-4;Q9P0N9	TBCD7_HUMAN	TBC1D7	TBC1 domain family member 7
20.8774	20.2195	O00566	U3KQ48;A0A8Q3WKH7;O00566	MPP10_HUMAN	MPHOSPH10	U3 small nucleolar ribonucleoprotein protein MPP10
20.8926	20.6701	Q8NEF9	Q8NEF9	SRFB1_HUMAN	SRFBP1	Serum response factor-binding protein 1
20.8944	19.9649	Q9HAH1	A0A0C4DGQ3;Q9HAH1	ZN556_HUMAN	ZNF556	Zinc finger protein 556
20.8949	18.9423	O75147	A6NN50;O75147-1;O75147-2;O75147-4;O75147	OBSL1_HUMAN	OBSL1	Obscurin-like protein 1
20.9057	20.2357	P15529;P15529-10;P15529-11;P15529-12;P15529-13;P15529-14;P15529-15	P15529-10;P15529-11;P15529-12;P15529-13;P15529-14;P15529-15;P15529	MCP_HUMAN	CD46	Membrane cofactor protein
20.9072	NaN	Q9Y6K0	A0A8V8TRF3;A0A8V8TQL1;A0A8V8TQ23;Q9Y6K0	CEPT1_HUMAN	CEPT1	Choline/ethanolaminephosphotransferase 1
20.9137	20.2407	A2RUC4	A2RUC4-2;A2RUC4	TYW5_HUMAN	TYW5	tRNA wybutosine-synthesizing protein 5
20.9156	19.6573	Q9UQB3;Q9UQB3-2	E7EPC8;B4DRK2;Q9UQB3-2;E9PHB5;A0A994J5I1;A0A994J5V2;Q9UQB3	CTND2_HUMAN	CTNND2	Catenin delta-2
20.9164	20.1192	Q92504	A2AAT0;A0A8V8TNV9;A0A8V8TM21;Q92504	S39A7_HUMAN	SLC39A7	Zinc transporter SLC39A7
20.9226	NaN	Q9UKB1;Q9UKB1-2;Q9UKB1-3	Q9UKB1-2;Q9UKB1-3;E5RGC1;Q9UKB1	FBW1B_HUMAN	FBXW11	F-box/WD repeat-containing protein 11
20.9244	20.0019	O60551	O60551	NMT2_HUMAN	NMT2	Glycylpeptide N-tetradecanoyltransferase 2
20.9254	21.097	P01137	A0A499FJK2;A0A7I2YQL8;A0A7I2V5Z9;P01137	TGFB1_HUMAN	TGFB1	Transforming growth factor beta-1 proprotein
20.9308	19.3792	P10515	H0YDD4;A0A7P0T997;A0A7P0TAX2;A0A7P0TBE2;A0A7P0TBK2;A0A7P0TA47;A0A7P0TAG1;A0A7P0Z4G4;E9PEJ4;P10515	ODP2_HUMAN	DLAT	Dihydrolipoyllysine-residue acetyltransferase component of pyruvate dehydrogenase complex, mitochondrial
20.931	19.646	Q14689;Q14689-5;Q14689-6	A0A494C143;Q14689-2;Q14689-3;Q14689-4;Q14689-5;Q14689-6;Q14689	DIP2A_HUMAN	DIP2A	Disco-interacting protein 2 homolog A
20.9365	19.9344	Q8WUJ0	Q8WUJ0	STYX_HUMAN	STYX	Serine/threonine/tyrosine-interacting protein
20.9444	20.1948	C9J4X2	C9J4X2	C9J4X2_HUMAN	NONO	Isoform of Q15233, Non-POU domain-containing octamer-binding protein (Fragment)
20.9468	19.4684	Q8N7X0	A0A7P0T963;Q8N7X0	ADGB_HUMAN	ADGB	Androglobin
20.9509	NaN	A0A7P0T9I3;A0A994J506;A0A994J509	A0A7P0T9I3;A0A994J506;A0A994J509	A0A7P0T9I3_HUMAN;A0A994J506_HUMAN;A0A994J509_HUMAN	MBNL2	Isoform of Q5VZF2, Muscleblind like splicing regulator 2
20.9524	17.6604	Q9UJS0;Q9UJS0-2	R4GN64;Q9UJS0-2;Q9UJS0	S2513_HUMAN	SLC25A13	Electrogenic aspartate/glutamate antiporter SLC25A13, mitochondrial
20.9533	NaN	Q9BWT3;Q9BWT3-2	Q9BWT3-2;A0A0C4DH56;Q9BWT3	PAPOG_HUMAN	PAPOLG	Poly(A) polymerase gamma
20.9538	16.5021	Q9NYY8;Q9NYY8-2	Q9NYY8-2;Q9NYY8	FAKD2_HUMAN	FASTKD2	FAST kinase domain-containing protein 2, mitochondrial
20.954	21.0538	Q5TCZ1;Q5TCZ1-2;Q5TCZ1-3	Q5TCZ1-2;Q5TCZ1-3;Q5TCZ1	SPD2A_HUMAN	SH3PXD2A	SH3 and PX domain-containing protein 2A
20.9563	NaN	Q9HCP0;Q9HCP0-2	A0A0U1RR14;A0A0U1RQK2;A0A0U1RQT7;A0A0U1RQY7;A0A0U1RQH9;A0A0U1RRH5;Q9HCP0-2;Q8IXA3;U3KQA5;U3KQB3;Q9HCP0	KC1G1_HUMAN	CSNK1G1	Casein kinase I isoform gamma-1
20.9648	20.4	P53801	A8MXQ1;A8MZH8;P53801	PTTG_HUMAN	PTTG1IP	Pituitary tumor-transforming gene 1 protein-interacting protein
20.9774	20.2541	P13473	P13473	LAMP2_HUMAN	LAMP2	Lysosome-associated membrane glycoprotein 2
20.9824	19.0832	O43167;O43167-2	A0A8V8TNA6;A0A8V8TNL7;A0A8V8TLS8;A0A8V8TLT3;A0A8V8TLV5;A0A8V8TMC2;O43167-2;O43167	ZBT24_HUMAN	ZBTB24	Zinc finger and BTB domain-containing protein 24
20.9839	20.088	O14772;O14772-2	A0A0S2Z5C6;O14772-2;O14772-3;H0YDF0;Q59H18-1;Q59H18-3;Q59H18-4;E9PMK0;E9PMM4;E9PK10;E9PKE1;V9GXZ4;A6NHC7;A0A3B3ITB1;O14772	FPGT_HUMAN	FPGT	Fucose-1-phosphate guanylyltransferase
20.9842	18.7049	Q9H6X2;Q9H6X2-2;Q9H6X2-3;Q9H6X2-4;Q9H6X2-5;Q9H6X2-6	H0YC24;A0A7P0T9B0;Q9H6X2-2;Q9H6X2-3;Q9H6X2-4;Q9H6X2-5;Q9H6X2-6;A0A7P0Z463;Q9H6X2	ANTR1_HUMAN	ANTXR1	Anthrax toxin receptor 1
20.9866	18.8173	Q13017;Q13017-2	Q13017-2;Q13017	RHG05_HUMAN	ARHGAP5	Rho GTPase-activating protein 5
20.9871	NaN	Q9UBI6	Q9UBI6	GBG12_HUMAN	GNG12	Guanine nucleotide-binding protein G(I)/G(S)/G(O) subunit gamma-12
20.9894	19.1045	Q9H9L3	Q9H9L3	I20L2_HUMAN	ISG20L2	Interferon-stimulated 20 kDa exonuclease-like 2
20.9899	20.8997	Q96CM8;Q96CM8-2;Q96CM8-3;Q96CM8-4	Q96CM8-2;Q96CM8-3;Q96CM8-4;E9PF16;Q96CM8	ACSF2_HUMAN	ACSF2	Medium-chain acyl-CoA ligase ACSF2, mitochondrial
20.995	20.3303	O95613	A0A8V8TQT6;A0A8V8TQ91;A0A8Q3SHZ3;A0A8Q3SHV6;A0A8Q3SI04;O95613	PCNT_HUMAN	PCNT	Pericentrin
20.9997	18.0499	Q5SWA1	A0A8I5KSH1;Q5SWA1	PR15B_HUMAN	PPP1R15B	Protein phosphatase 1 regulatory subunit 15B
21.0006	19.0635	P20810-2	A0A6Q8PFF6;A0A6Q8PFE5;E7ES10;P20810-2;P20810-4;P20810-8;E7EQK6;D6RBZ8;E9PCH5;E9PDE4;P20810	ICAL_HUMAN	CAST	Isoform of P20810, Isoform 2 of Calpastatin
21.0037	19.6237	Q9UDY2;Q9UDY2-3;Q9UDY2-6;Q9UDY2-7	A0A2R8YDH4;A0A1B0GTW1;A0A3B3IRV6;A0A3B3ISF1;A0A3B3ISZ5;A0A3B3IT83;A0A3B3ITE1;A0A3B3IU51;A0A3B3IRI3;A0A3B3IS03;Q9UDY2-2;Q9UDY2-3;Q9UDY2-4;Q9UDY2-5;Q9UDY2-6;Q9UDY2-7;Q9UDY2	ZO2_HUMAN	TJP2	Tight junction protein ZO-2
21.0058	20.0616	P48681	P48681	NEST_HUMAN	NES	Nestin
21.0177	18.8388	Q8NF64;Q8NF64-2;Q8NF64-3	E7EWM3;Q8NF64-3;Q8NF64-2;Q8NF64	ZMIZ2_HUMAN	ZMIZ2	Zinc finger MIZ domain-containing protein 2
21.0215	19.8303	O60930	O60930	RNH1_HUMAN	RNASEH1	Ribonuclease H1
21.0269	20.698	Q96N66;Q96N66-2	Q96N66-2;Q96N66	MBOA7_HUMAN	MBOAT7	Lysophospholipid acyltransferase 7
21.0281	20.6229	Q9BW66;Q9BW66-2;Q9BW66-3	H0YN33;H0YKY0;Q9BW66-2;Q9BW66-3;Q9BW66	CINP_HUMAN	CINP	Cyclin-dependent kinase 2-interacting protein
21.0442	20.3694	Q9UKY1	Q9UKY1	ZHX1_HUMAN	ZHX1	Zinc fingers and homeoboxes protein 1
21.051	21.2985	Q9H1K0	H7C204;Q9H1K0	RBNS5_HUMAN	RBSN	Rabenosyn-5
21.0563	NaN	Q9Y2Z4	H0YHS6;Q9Y2Z4	SYYM_HUMAN	YARS2	Tyrosine--tRNA ligase, mitochondrial
21.0602	20.5084	O75503	A0A1B0GWI2;O75503	CLN5_HUMAN	CLN5	Ceroid-lipofuscinosis neuronal protein 5
21.0626	19.3727	A0A8V8TKR9;E9PNV3;E9PQ82;V9GZ54	V9GZ54;E9PQ82;E9PNV3;A0A8V8TKR9	A0A8V8TKR9_HUMAN;E9PNV3_HUMAN;E9PQ82_HUMAN;V9GZ54_HUMAN	MSN;RDX	Isoform of P26038, Moesin
21.0652	19.3739	P02100;P69891;P69892	E9PBW4;A0A2R8Y7X9;P69891;P02100;P69892	HBE_HUMAN;HBG1_HUMAN;HBG2_HUMAN	HBE1;HBG1;HBG2	Hemoglobin subunit epsilon
21.066	19.6818	Q96BD8	Q96BD8	SKA1_HUMAN	SKA1	Spindle and kinetochore-associated protein 1
21.0727	20.2802	Q9Y6B7	B1ALD0;Q9Y6B7	AP4B1_HUMAN	AP4B1	AP-4 complex subunit beta-1
21.0736	NaN	Q9H3H1;Q9H3H1-2;Q9H3H1-3;Q9H3H1-4;Q9H3H1-5;Q9H3H1-6	Q3T7B4;Q9H3H1-2;Q9H3H1-3;Q9H3H1-4;Q9H3H1-5;Q9H3H1-6;Q9H3H1	MOD5_HUMAN	TRIT1	tRNA dimethylallyltransferase
21.0973	20.7527	Q9BSU3	H0Y8T0;Q9BSU3	NAA11_HUMAN	NAA11	N-alpha-acetyltransferase 11
21.1002	21.1177	O75477	B0QZ43;O75477	ERLN1_HUMAN	ERLIN1	Erlin-1
21.1024	20.4876	Q9NVR0	Q9NVR0	KLH11_HUMAN	KLHL11	Kelch-like protein 11
21.1067	NaN	Q9NXX6	Q9NXX6	NSE4A_HUMAN	NSMCE4A	Non-structural maintenance of chromosomes element 4 homolog A
21.1076	20.4263	Q92844	E7EVA2;E7EW82;E7EWR8;E7EV32;E7ERM9;E7EQA9;Q92844-2;Q92844-3;E7EMT6;E7ENY2;E7EM55;Q92844	TANK_HUMAN	TANK	TRAF family member-associated NF-kappa-B activator
21.1172	21.8201	Q13569	G8JL98;B4E127;Q13569	TDG_HUMAN	TDG	G/T mismatch-specific thymine DNA glycosylase
21.1178	20.3534	Q7Z3K3;Q7Z3K3-2;Q7Z3K3-3;Q7Z3K3-5;Q7Z3K3-6;Q7Z3K3-7	A0A8V8TQ67;Q7Z3K3-2;Q7Z3K3-3;Q7Z3K3-5;Q7Z3K3-6;Q7Z3K3-7;Q7Z3K3	POGZ_HUMAN	POGZ	Pogo transposable element with ZNF domain
21.119	17.3618	O60658;O60658-6	O60658-2;O60658-6;O60658	PDE8A_HUMAN	PDE8A	High affinity cAMP-specific and IBMX-insensitive 3',5'-cyclic phosphodiesterase 8A
21.1206	22.9611	O14880	Q5VV89;O14880	MGST3_HUMAN	MGST3	Glutathione S-transferase 3, mitochondrial
21.1214	20.0434	P43007	P43007-2;P43007	SATT_HUMAN	SLC1A4	Neutral amino acid transporter A
21.1236	19.5342	Q5VTL8	Q5VTL8-2;Q5VTL8	PR38B_HUMAN	PRPF38B	Pre-mRNA-splicing factor 38B
21.1241	21.2407	Q8TCJ2	Q8TCJ2	STT3B_HUMAN	STT3B	Dolichyl-diphosphooligosaccharide--protein glycosyltransferase subunit STT3B
21.1281	19.3039	Q9Y6R4;Q9Y6R4-2	J3KNB8;Q9Y6R4-2;F5H4R1;F5H538;Q9Y6R4	M3K4_HUMAN	MAP3K4	Mitogen-activated protein kinase kinase kinase 4
21.1295	21.0033	Q8TB72-3;Q8TB72-4	Q8TB72-2;Q8TB72-3;Q8TB72-4;A0A0C4DG68;Q8TB72	PUM2_HUMAN	PUM2	Isoform of Q8TB72, Isoform 3 of Pumilio homolog 2
21.1334	20.2827	O14974-3	O14974-3	MYPT1_HUMAN	PPP1R12A	Isoform of O14974, Isoform 3 of Protein phosphatase 1 regulatory subunit 12A
21.1362	21.3708	Q9BQI0;Q9BQI0-2;Q9BQI0-3	Q5JUP3;Q9BQI0-2;Q9BQI0-3;Q9BQI0-4;Q9BQI0	AIF1L_HUMAN	AIF1L	Allograft inflammatory factor 1-like
21.138	20.4075	P00751	P00751-2;H7C5H1;A0A8V8TNU0;A0A8V8TMI9;A0A0G2JH38;B4E1Z4;E7ETN3;P00751	CFAB_HUMAN	CFB	Complement factor B
21.138	20.0021	Q8TCZ2;Q8TCZ2-2;Q8TCZ2-3;Q8TCZ2-5	A0A0U1RQT8;Q8TCZ2-2;Q8TCZ2-3;Q8TCZ2-5;Q8TCZ2-6;Q8TCZ2	C99L2_HUMAN	CD99L2	CD99 antigen-like protein 2
21.1448	19.6545	P46087;P46087-2;P46087-4	P46087-2;P46087-4;P46087	NOP2_HUMAN	NOP2	Probable 28S rRNA (cytosine(4447)-C(5))-methyltransferase
21.1571	20.4404	O95793;O95793-2;O95793-3	O95793-2;O95793-3;Q5JW30;O95793	STAU1_HUMAN	STAU1	Double-stranded RNA-binding protein Staufen homolog 1
21.1572	20.8171	Q9NX38	X6REY2;Q9NX38	ABITM_HUMAN	ABITRAM	Protein Abitram
21.1635	19.3859	Q86X53	H0YBT6;H0YB25;E5RHA3;Q86X53	ERIC1_HUMAN	ERICH1	Glutamate-rich protein 1
21.1668	22.9364	P02461;P02461-2	P02461-2;P02461	CO3A1_HUMAN	COL3A1	Collagen alpha-1(III) chain
21.1709	21.7386	Q9H8Y8	Q9H8Y8-2;Q9H8Y8-3;Q9H8Y8	GORS2_HUMAN	GORASP2	Golgi reassembly-stacking protein 2
21.175	20.2298	Q9Y4F1;Q9Y4F1-2	C9JME2;A0A1B0GV68;M0R262;M0QYB0;Q9Y4F1-2;Q9Y4F1	FARP1_HUMAN	FARP1	FERM, ARHGEF and pleckstrin domain-containing protein 1
21.1762	22.2393	Q14151	Q14151	SAFB2_HUMAN	SAFB2	Scaffold attachment factor B2
21.177	20.4402	Q8IY33;Q8IY33-2;Q8IY33-4	Q8IY33-2;Q8IY33-4;Q8IY33-5;Q8IY33	MILK2_HUMAN	MICALL2	MICAL-like protein 2
21.1796	20.915	Q96JJ7	Q96JJ7	TMX3_HUMAN	TMX3	Protein disulfide-isomerase TMX3
21.1833	20.0197	O75575	O75575-2;O75575-3;O75575-4;O75575	RPC9_HUMAN	CRCP	DNA-directed RNA polymerase III subunit RPC9
21.1871	NaN	Q9P031	Q9P031	TAP26_HUMAN	CCDC59	Thyroid transcription factor 1-associated protein 26
21.1883	19.4632	O14686;O14686-3	A0A804HHR9;A0A3B3ISC8;A0A8I5KSG1;O14686-3;O14686	KMT2D_HUMAN	KMT2D	Histone-lysine N-methyltransferase 2D
21.1924	18.105	Q15434	F8W1T6;Q15434	RBMS2_HUMAN	RBMS2	RNA-binding motif, single-stranded-interacting protein 2
21.1924	20.4728	Q15652;Q15652-3	H7BXU7;Q15652-2;Q15652-3;Q15652	JHD2C_HUMAN	JMJD1C	Probable JmjC domain-containing histone demethylation protein 2C
21.194	21.337	Q96BM9	Q96BM9	ARL8A_HUMAN	ARL8A	ADP-ribosylation factor-like protein 8A
21.1946	20.7292	Q9Y4C1	F8WE62;Q9Y4C1	KDM3A_HUMAN	KDM3A	Lysine-specific demethylase 3A
21.1964	20.9005	Q5VZL5;Q5VZL5-2	H7C1I7;Q5VZL5-2;Q5VZL5-3;Q5VZL5-4;Q5VZL5	ZMYM4_HUMAN	ZMYM4	Zinc finger MYM-type protein 4
21.1972	20.9438	Q8IYL3	A0A7P0T887;Q8IYL3	CA174_HUMAN	C1orf174	UPF0688 protein C1orf174
21.2007	19.4726	Q9BQT9-3	Q9BQT9-3;A0A3B3ISW0	CSTN3_HUMAN	CLSTN3	Isoform of Q9BQT9, Isoform CLSTN3beta of Calsyntenin-3
21.2015	18.8678	Q8TDJ6;Q8TDJ6-3	H0YLM8;Q8TDJ6-3;Q8TDJ6	DMXL2_HUMAN	DMXL2	DmX-like protein 2
21.2096	18.8061	P56182	P56182	RRP1_HUMAN	RRP1	Ribosomal RNA processing protein 1 homolog A
21.2189	18.0777	Q9Y232-2	Q9Y232-2;Q9Y232	CDYL_HUMAN	CDYL	Isoform of Q9Y232, Isoform 2 of Chromodomain Y-like protein
21.22	18.772	Q8WTS1	C9J1D1;A0A2R8YG22;Q8WTS1	ABHD5_HUMAN	ABHD5	1-acylglycerol-3-phosphate O-acyltransferase ABHD5
21.2238	20.566	Q96QD8	F8VUY8;Q96QD8	S38A2_HUMAN	SLC38A2	Sodium-coupled neutral amino acid symporter 2
21.2239	19.9409	O14657	O14657	TOR1B_HUMAN	TOR1B	Torsin-1B
21.2242	21.3332	Q9H6V9;Q9H6V9-2	Q9H6V9-2;B5MDU6;B4DRG3;B5MCE2;Q9H6V9	LDAH_HUMAN	LDAH	Lipid droplet-associated hydrolase
21.2356	19.6396	Q16891;Q16891-2;Q16891-3;Q16891-4	C9J406;Q16891-3;Q16891-4;Q16891-2;B9A067;H7C463;Q16891	MIC60_HUMAN	IMMT	MICOS complex subunit MIC60
21.2368	20.965	Q8WXH0;Q8WXH0-2	G3V5X4;Q8WXH0-2;Q8WXH0	SYNE2_HUMAN	SYNE2	Nesprin-2
21.2412	19.1581	Q96FF9	B5MBX0;Q96FF9	CDCA5_HUMAN	CDCA5	Sororin
21.2414	20.6123	Q9Y4E1-3	J3KP36;Q9Y4E1-4;Q9Y4E1-5;Q9Y4E1-6;Q9Y4E1-1;Q9Y4E1-2;Q9Y4E1-3;Q9Y4E1	WAC2C_HUMAN	WASHC2C	Isoform of Q9Y4E1, Isoform 4 of WASH complex subunit 2C
21.2444	18.9512	Q6Y288	Q6Y288	B3GLT_HUMAN	B3GLCT	Beta-1,3-glucosyltransferase
21.2465	20.5842	Q8TED0;Q8TED0-3	H0Y8P4;Q8TED0-3;Q8TED0	UTP15_HUMAN	UTP15	U3 small nucleolar RNA-associated protein 15 homolog
21.247	21.0026	Q68CZ6	Q68CZ6-2;A0A5F9ZHQ7;Q68CZ6	HAUS3_HUMAN	HAUS3	HAUS augmin-like complex subunit 3
21.2478	NaN	O00329	B7ZM44;F8W9P4;A0A8V8TNW9;A0A8V8TM62;A0A8V8TMM0;O00329	PK3CD_HUMAN	PIK3CD	Phosphatidylinositol 4,5-bisphosphate 3-kinase catalytic subunit delta isoform
21.2489	21.5136	P54277;P54277-3	P54277-2;P54277-4;P54277-3;B7ZAA0;P54277	PMS1_HUMAN	PMS1	PMS1 protein homolog 1
21.2552	19.3024	A0A804HKC3	A0A804HKC3	A0A804HKC3_HUMAN	PRRC2B	Isoform of Q5JSZ5, Proline rich coiled-coil 2B (Fragment)
21.2563	21.6345	Q14149	Q14149	MORC3_HUMAN	MORC3	MORC family CW-type zinc finger protein 3
21.257	20.5066	O75586;O75586-2	G3V4A5;O75586-2;A0A087WYL7;O75586	MED6_HUMAN	MED6	Mediator of RNA polymerase II transcription subunit 6
21.2572	19.0724	P42338	H0Y871;Q68DL0;P42338	PK3CB_HUMAN	PIK3CB	Phosphatidylinositol 4,5-bisphosphate 3-kinase catalytic subunit beta isoform
21.2646	18.0899	Q9Y657	Q5JUX0;Q9Y657	SPIN1_HUMAN	SPIN1	Spindlin-1
21.2653	19.737	Q9Y394;Q9Y394-2	Q9Y394-2;Q9Y394	DHRS7_HUMAN	DHRS7	Dehydrogenase/reductase SDR family member 7
21.2702	20.0945	Q9P219	Q9P219	DAPLE_HUMAN	CCDC88C	Protein Daple
21.2809	21.1843	Q96DR4	Q96DR4-2;D6REN7;D6RDM5;Q96DR4	STAR4_HUMAN	STARD4	StAR-related lipid transfer protein 4
21.2834	17.6478	Q06945	Q06945	SOX4_HUMAN	SOX4	Transcription factor SOX-4
21.2846	20.7623	Q6XUX3;Q6XUX3-2	Q6XUX3-2;Q6XUX3-4;Q6XUX3	DUSTY_HUMAN	DSTYK	Dual serine/threonine and tyrosine protein kinase
21.2857	20.6728	P42167	H0YJH7;P42167-2;G5E972;P42167	LAP2B_HUMAN	TMPO	Isoform of P42166, Lamina-associated polypeptide 2, isoforms beta/gamma
21.2869	NaN	Q9UBT6;Q9UBT6-3;Q9UBT6-8	Q9UBT6-3;Q9UBT6-8;Q9UBT6	POLK_HUMAN	POLK	DNA polymerase kappa
21.2891	18.3348	O14975;O14975-2	G3V1R7;O14975-2;O14975	S27A2_HUMAN	SLC27A2	Long-chain fatty acid transport protein 2
21.2923	21.2846	P10746	Q5T3L7;Q5T3L8;Q5T3L9;A0A3B3IS76;A0A3B3ISL9;A0A3B3ISM6;A0A3B3ISX6;A0A3B3ITJ2;A0A3B3IUC8;A0A3B3IU75;P10746	HEM4_HUMAN	UROS	Uroporphyrinogen-III synthase
21.2938	21.5341	Q7Z624	Q7Z624-2;B5MC79;B5MC16;Q7Z624	CMKMT_HUMAN	CAMKMT	Calmodulin-lysine N-methyltransferase
21.3035	19.2977	P51608-2	P51608-2;P51608	MECP2_HUMAN	MECP2	Isoform of P51608, Isoform B of Methyl-CpG-binding protein 2
21.3057	NaN	Q9NW38;Q9NW38-2	Q9NW38-2;B4DN24;B5MC31;H7C1M0;A0A8Q3WMH1;A0A8Q3WMB2;A0A8Q3WMB7;A0A8Q3WMD8;A0A8Q3WMF8;A0A8Q3WLW1;A0A8Q3WM87;A0A8Q3WLU8;A0A8Q3WM99;A0A8Q3WLF1;A0A8Q3WLE2;A0A8Q3WLF5;A0A8Q3WLH7;A0A8Q3WLA4;A0A8Q3WLA5;A0A8Q3WLB5;A0A8Q3WLB8;A0A8Q3WLD6;A0A8Q3WL63;A0A8Q3WL68;A0A8Q3WLC1;A0A8Q3WLC2;A0A8Q3WL81;A0A8Q3WL86;A0A8Q3WL92;A0A8Q3SIL3;A0A8Q3SIK5;A0A8Q3SIK6;A0A8Q3SIM1;A0A8Q3SIM8;A0A8Q3SIP2;A0A8Q3SIP3;A0A8Q3SIQ5;A0A8Q3…	FANCL_HUMAN	FANCL	E3 ubiquitin-protein ligase FANCL
21.3114	15.1458	Q86U70;Q86U70-2	A0A6E1WJ75;O43679-2;O43679-3;G5E9Y7;E9PFI4;Q86U70-2;Q86U70-3;Q86U70;O43679	LDB1_HUMAN	LDB1	LIM domain-binding protein 1
21.3124	NaN	Q9NX09	Q9NX09	DDIT4_HUMAN	DDIT4	DNA damage-inducible transcript 4 protein
21.3164	15.7893	O43741	O43741-2;O43741	AAKB2_HUMAN	PRKAB2	5'-AMP-activated protein kinase subunit beta-2
21.3197	21.774	Q92564;Q92564-3	Q92564-2;Q92564-3;D6RB33;D6RDV8;Q92564	DCNL4_HUMAN	DCUN1D4	DCN1-like protein 4
21.3223	18.8755	Q9UDY8;Q9UDY8-2	Q9UDY8-2;Q9UDY8	MALT1_HUMAN	MALT1	Mucosa-associated lymphoid tissue lymphoma translocation protein 1
21.3237	18.899	Q6QNY1	Q6QNY1	BL1S2_HUMAN	BLOC1S2	Biogenesis of lysosome-related organelles complex 1 subunit 2
21.324	20.7911	Q14CS0	H0YAX6;E5RJ36;Q14CS0	UBX2B_HUMAN	UBXN2B	UBX domain-containing protein 2B
21.3478	18.7064	P45954;P45954-2	P45954-2;P45954	ACDSB_HUMAN	ACADSB	Short/branched chain specific acyl-CoA dehydrogenase, mitochondrial
21.3513	20.2194	Q9NRA8;Q9NRA8-3	Q9NRA8-2;Q9NRA8-3;B1AKL4;Q9NRA8	4ET_HUMAN	EIF4ENIF1	Eukaryotic translation initiation factor 4E transporter
21.3521	20.9885	Q96CG3	Q96CG3	TIFA_HUMAN	TIFA	TRAF-interacting protein with FHA domain-containing protein A
21.3594	20.8351	Q15032;Q15032-2;Q15032-3	A0A804HIA8;H7C207;Q15032-2;Q15032-3;Q15032-4;Q15032	R3HD1_HUMAN	R3HDM1	R3H domain-containing protein 1
21.3635	19.6168	Q13111	K7EJF1;Q13111-2;Q13111-3;Q13111	CAF1A_HUMAN	CHAF1A	Chromatin assembly factor 1 subunit A
21.3639	NaN	Q9NRR4;Q9NRR4-2;Q9NRR4-3;Q9NRR4-4	Q9NRR4-2;Q9NRR4-3;Q9NRR4-4;Q9NRR4	RNC_HUMAN	DROSHA	Ribonuclease 3
21.3817	19.8478	P61073;P61073-2	P61073-2;A0A8Q3WLL1;A0A8Q3WL10;P61073	CXCR4_HUMAN	CXCR4	C-X-C chemokine receptor type 4
21.3826	21.1863	O43159	E9PPY3;O43159	RRP8_HUMAN	RRP8	Ribosomal RNA-processing protein 8
21.3864	19.3175	Q96C57	G5EA44;E7ENF1;F5H8B7;F5H7W8;Q96C57	CSTOS_HUMAN	CUSTOS	Protein CUSTOS
21.3879	21.0192	A0A8I5KPG1	A0A8I5KPG1	A0A8I5KPG1_HUMAN	SEC16A	Isoform of O15027, Protein transport protein sec16
21.3905	21.453	O75167;O75167-2;O75167-4;O75167-5	J3KP75;O75167-2;O75167-4;O75167-5;F5H858;H9KVA6;O75167	PHAR2_HUMAN	PHACTR2	Phosphatase and actin regulator 2
21.391	20.3726	Q8IWV8;Q8IWV8-4	Q8IWV8-4;Q8IWV8	UBR2_HUMAN	UBR2	E3 ubiquitin-protein ligase UBR2
21.4011	19.2093	Q96A33;Q96A33-2	Q96A33-2;J3QR89;Q96A33	CCD47_HUMAN	CCDC47	PAT complex subunit CCDC47
21.4042	21.8766	Q9NZD8	H0YLT5;H0YMB7;H0YKM6;H0YKB0;Q9NZD8	SPG21_HUMAN	SPG21	Maspardin
21.4081	18.9106	Q9NS69	Q9NS69	TOM22_HUMAN	TOMM22	Mitochondrial import receptor subunit TOM22 homolog
21.409	19.3958	O75683	O75683	SURF6_HUMAN	SURF6	Surfeit locus protein 6
21.421	NaN	Q9H000;Q9H000-2	C9J494;Q9H000-2;A0A7I2YQI0;A0A7I2V5D2;Q9H000	MKRN2_HUMAN	MKRN2	E3 ubiquitin-protein ligase makorin-2
21.4216	21.5268	Q96IZ7;Q96IZ7-2	Q96IZ7-2;C9JVB3;A0A804HLK3;A0A804HJC0;A0A804HJI2;H7C5Q0;Q96IZ7	RSRC1_HUMAN	RSRC1	Serine/Arginine-related protein 53
21.424	18.7703	Q15596	E7EWM1;Q15596	NCOA2_HUMAN	NCOA2	Nuclear receptor coactivator 2
21.4252	17.4071	Q14644	Q14644-2;Q14644	RASA3_HUMAN	RASA3	Ras GTPase-activating protein 3
21.4265	20.1918	Q5HYI8	F8WF50;F8WDC7;F8WAX9;C9JXM3;H7C533;Q5HYI8	RABL3_HUMAN	RABL3	Rab-like protein 3
21.434	17.4127	Q12840	J3KNA1;A0A6Q8PGN1;A0A6Q8PGJ3;A0A6Q8PGG7;A0A6Q8PEZ8;Q12840	KIF5A_HUMAN	KIF5A	Kinesin heavy chain isoform 5A
21.4428	18.8377	O75943;O75943-2	H0Y9T7;O75943-2;O75943-3;O75943-4;A0A0G2JP78;A0A0G2JP31;A0A0G2JPT5;A0A0G2JNH5;O75943	RAD17_HUMAN	RAD17	Cell cycle checkpoint protein RAD17
21.4431	18.8198	Q96RF0;Q96RF0-2;Q96RF0-3	Q96RF0-2;Q96RF0-3;Q96RF0	SNX18_HUMAN	SNX18	Sorting nexin-18
21.4439	22.4805	Q9BTL3	Q9BTL3	RAMAC_HUMAN	RAMAC	RNA guanine-N7 methyltransferase activating subunit
21.4476	NaN	O43759;O43759-2	O43759-2;O43759-3;B5MCD7;O43759	SNG1_HUMAN	SYNGR1	Synaptogyrin-1
21.4498	20.2535	Q8IWA0	Q8IWA0	WDR75_HUMAN	WDR75	WD repeat-containing protein 75
21.4526	20.0067	Q7Z434;Q7Z434-4	Q7Z434-4;Q7Z434	MAVS_HUMAN	MAVS	Mitochondrial antiviral-signaling protein
21.4546	NaN	Q9NVH2;Q9NVH2-2;Q9NVH2-3	Q9NVH2-2;Q9NVH2-3;Q9NVH2-4;Q9NVH2	INT7_HUMAN	INTS7	Integrator complex subunit 7
21.4558	20.4085	Q9NUQ6;Q9NUQ6-2;Q9NUQ6-3;Q9NUQ6-4	B8ZZZ7;Q9NUQ6-2;Q9NUQ6-3;Q9NUQ6-4;Q9NUQ6	SPS2L_HUMAN	SPATS2L	SPATS2-like protein
21.4593	19.8483	Q13164	Q13164-2;Q13164	MK07_HUMAN	MAPK7	Mitogen-activated protein kinase 7
21.4748	24.0909	O43933;O43933-2	O43933-2;A0A0C4DG33;O43933	PEX1_HUMAN	PEX1	Peroxisomal ATPase PEX1
21.4799	20.3894	Q9Y5Z9;Q9Y5Z9-2	Q9Y5Z9-2;Q9Y5Z9	UBIA1_HUMAN	UBIAD1	UbiA prenyltransferase domain-containing protein 1
21.4837	19.3624	Q9BRS8	Q9BRS8	LARP6_HUMAN	LARP6	La-related protein 6
21.4841	20.8472	Q9NYZ1	C9JYS5;J3QL47;J3QL63;Q9NYZ1	TV23B_HUMAN	TVP23B	Golgi apparatus membrane protein TVP23 homolog B
21.4891	20.5538	Q6P158	H7C109;Q6P158	DHX57_HUMAN	DHX57	Putative ATP-dependent RNA helicase DHX57
21.4959	17.7822	Q9UBP9;Q9UBP9-3;Q9UBP9-4	H0Y6R1;A0A8V8TP70;Q9UBP9-4;Q9UBP9-3;Q9UBP9	GULP1_HUMAN	GULP1	PTB domain-containing engulfment adapter protein 1
21.4983	18.851	Q9UNL2;Q9UNL2-2	Q9UNL2-2;C9JA28;Q9UNL2	SSRG_HUMAN	SSR3	Translocon-associated protein subunit gamma
21.5027	20.8846	Q52LW3	F8VWZ8;Q52LW3	RHG29_HUMAN	ARHGAP29	Rho GTPase-activating protein 29
21.5035	18.8773	P17275	P17275	JUNB_HUMAN	JUNB	Transcription factor JunB
21.5072	21.0992	P30519	A0A1B0GXH0;I3L4P8;I3L463;I3L276;I3L1F5;I3L159;P30519	HMOX2_HUMAN	HMOX2	Heme oxygenase 2
21.5133	20.7612	P31321	C9JSK5;H7BYW5;P31321	KAP1_HUMAN	PRKAR1B	cAMP-dependent protein kinase type I-beta regulatory subunit
21.515	19.6789	P05067-5;P05067-6	P05067-10;P05067-11;A0A0A0MRG2;H7C2L2;H7C0V9;E9PG40;P05067-3;P05067-4;P05067-5;P05067-6;P05067-7;P05067-8;P05067-9;P05067	A4_HUMAN	APP	Isoform of P05067, Isoform L-APP696 of Amyloid-beta precursor protein
21.5161	21.8819	Q8NFQ8	Q8NFQ8	TOIP2_HUMAN	TOR1AIP2	Torsin-1A-interacting protein 2
21.5193	20.0851	Q71SY5;Q71SY5-4;Q71SY5-5	Q71SY5-4;Q71SY5-5;Q71SY5-6;M0QZQ2;Q71SY5	MED25_HUMAN	MED25	Mediator of RNA polymerase II transcription subunit 25
21.5229	20.8358	P05496;P48201;Q06055;Q06055-2;Q06055-3	E7EPU7;E7EQ97;D6R9H7;Q06055-2;Q06055-3;I3L0Y5;Q06055;P05496;P48201	AT5G1_HUMAN;AT5G2_HUMAN;AT5G3_HUMAN	ATP5MC1;ATP5MC2;ATP5MC3	ATP synthase F(0) complex subunit C1, mitochondrial
21.5255	16.9152	Q92619;Q92619-2	Q92619-2;K7EM85;K7ES92;K7ES98;F5H1R4;Q92619	HMHA1_HUMAN	ARHGAP45	Rho GTPase-activating protein 45
21.5271	NaN	Q9NUQ7	H0YA18;H0Y9B0;Q9NUQ7	UFSP2_HUMAN	UFSP2	Ufm1-specific protease 2
21.5277	20.6206	P08648	P08648	ITA5_HUMAN	ITGA5	Integrin alpha-5
21.5318	21.0327	Q9UHB6-5	Q9UHB6-4;Q9UHB6-5	LIMA1_HUMAN	LIMA1	Isoform of Q9UHB6, Isoform 5 of LIM domain and actin-binding protein 1
21.5334	21.2022	P42694	A0A075B6R3;P42694-2;J3QS41;P42694	HELZ_HUMAN	HELZ	Probable helicase with zinc finger domain
21.5427	21.2006	O15226;O15226-2	O15226-2;A0A8I5KX72;O15226	NKRF_HUMAN	NKRF	NF-kappa-B-repressing factor
21.5429	20.5632	Q504Q3;Q504Q3-2;Q504Q3-3	Q504Q3-2;Q504Q3-3;Q504Q3	PAN2_HUMAN	PAN2	PAN2-PAN3 deadenylation complex catalytic subunit PAN2
21.5481	NaN	O00189	C9IZL5;F8WCR6;C9JWL4;C9JMG3;H0Y6K1;C9JC87;O00189	AP4M1_HUMAN	AP4M1	AP-4 complex subunit mu-1
21.5503	19.4436	Q8IYB1	Q8IYB1	M21D2_HUMAN	MB21D2	Nucleotidyltransferase MB21D2
21.5551	20.1011	Q9ULH1;Q9ULH1-2	H0YBF7;Q9ULH1-2;A0A0A0MRE5;Q9ULH1	ASAP1_HUMAN	ASAP1	Arf-GAP with SH3 domain, ANK repeat and PH domain-containing protein 1
21.5577	19.9774	Q96DM3	K7ENL9;Q96DM3	RMC1_HUMAN	RMC1	Regulator of MON1-CCZ1 complex
21.558	18.6501	Q86WG5	Q86WG5-3;A0A8I5QJN8;A0A6Q8PH87;A0A6Q8PH13;A0A6Q8PHP8;H0YD05;H0Y767;A0A8I5KQ02;A0A8I5KRP8;A0A8I5KTX3;A0A8I5KTA9;A0A8I5KVJ0;A0A8I5KWY5;A0A8I5KY55;Q86WG5	MTMRD_HUMAN	SBF2	Myotubularin-related protein 13
21.5595	18.735	Q96AY4	A0A087WW06;Q96AY4	TTC28_HUMAN	TTC28	Tetratricopeptide repeat protein 28
21.5662	NaN	Q9UQ84;Q9UQ84-4	Q9UQ84-4;Q9UQ84	EXO1_HUMAN	EXO1	Exonuclease 1
21.5678	20.8587	Q9Y2I1;Q9Y2I1-3;Q9Y2I1-4	C9J715;Q9Y2I1-3;Q9Y2I1-4;Q9Y2I1	NISCH_HUMAN	NISCH	Nischarin
21.5702	21.826	Q9NY57;Q9NY57-2	Q9NY57-2;Q9NY57	ST32B_HUMAN	STK32B	Serine/threonine-protein kinase 32B
21.5703	21.6424	Q6DHV7;Q6DHV7-2	Q6DHV7-2;Q6DHV7-3;Q6DHV7	ADAL_HUMAN	ADAL	Adenosine deaminase-like protein
21.5711	20.6318	Q8WZ82	Q8WZ82	OVCA2_HUMAN	OVCA2	Esterase OVCA2
21.5717	19.3311	E9PLY5	E9PLY5	E9PLY5_HUMAN	MACF1	Isoform of Q9UPN3, Microtubule actin crosslinking factor 1 (Fragment)
21.5724	20.5662	Q9BYT3	F8WAK5;B4DDH2;Q9BYT3-2;A0A0C4DH60;Q9BYT3	STK33_HUMAN	STK33	Serine/threonine-protein kinase 33
21.5756	NaN	Q9BVT8	C9JCW7;C9JE12;A0A590UJA9;Q9BVT8	TMUB1_HUMAN	TMUB1	Transmembrane and ubiquitin-like domain-containing protein 1
21.5767	19.0644	Q14191	Q14191	WRN_HUMAN	WRN	Bifunctional 3'-5' exonuclease/ATP-dependent helicase WRN
21.5787	19.7478	O43513	E5RIE8;O43513	MED7_HUMAN	MED7	Mediator of RNA polymerase II transcription subunit 7
21.5803	22.4065	P32322	P32322-2;J3KQ22;J3KTA8;E2QRB3;J3QL32;J3QKT3;J3QL24;J3QLK9;J3QR88;J3QRZ0;P32322	P5CR1_HUMAN	PYCR1	Pyrroline-5-carboxylate reductase 1, mitochondrial
21.5856	NaN	O00748;O00748-4	O00748-2;O00748-4;O00748-5;J3QSC0;O00748	EST2_HUMAN	CES2	Cocaine esterase
21.5901	NaN	Q9Y6X8	Q9Y6X8	ZHX2_HUMAN	ZHX2	Zinc fingers and homeoboxes protein 2
21.5917	21.0507	Q9ULJ3	Q9ULJ3-2;Q9ULJ3	ZBT21_HUMAN	ZBTB21	Zinc finger and BTB domain-containing protein 21
21.5918	20.4268	Q6UWZ7;Q6UWZ7-2	D6REL5;Q6UWZ7-2;Q6UWZ7	ABRX1_HUMAN	ABRAXAS1	BRCA1-A complex subunit Abraxas 1
21.592	17.3772	Q9BXK5	Q9BXK5-2;A0A087WX97;Q9BXK5	B2L13_HUMAN	BCL2L13	Bcl-2-like protein 13
21.5958	NaN	Q9UNK0	I3L305;Q9UNK0	STX8_HUMAN	STX8	Syntaxin-8
21.6008	17.7501	Q15059	Q15059-2;Q15059	BRD3_HUMAN	BRD3	Bromodomain-containing protein 3
21.6014	20.7519	Q9BZJ0-2	Q9BZJ0-2;Q9BZJ0-3;Q5JY65;Q9BZJ0	CRNL1_HUMAN	CRNKL1	Isoform of Q9BZJ0, Isoform 2 of Crooked neck-like protein 1
21.6046	19.4524	Q9BWE0;Q9BWE0-4	Q9BWE0-4;C9JYJ8;C9JZE3;Q9BWE0	REPI1_HUMAN	REPIN1	Replication initiator 1
21.6107	19.2903	P33527;P33527-2;P33527-4;P33527-6	P33527-2;P33527-3;P33527-4;P33527-5;P33527-6;P33527-7;P33527-8;A0A7I2V2E0;A0A7I2V4C6;P33527	MRP1_HUMAN	ABCC1	Multidrug resistance-associated protein 1
21.6124	18.6522	Q92574	A0A2R8Y6S1;A0A2R8Y5S3;A0A2R8Y5N2;A0A2R8YFV7;A0A2R8YEH9;Q92574-2;Q92574	TSC1_HUMAN	TSC1	Hamartin
21.6143	NaN	Q9Y3E5	J3KQ48;Q9Y3E5	PTH2_HUMAN	PTRH2	Peptidyl-tRNA hydrolase 2, mitochondrial
21.6216	18.9962	P62987	M0R2S1;P62987	RL40_HUMAN	UBA52	Ubiquitin-ribosomal protein eL40 fusion protein
21.6252	NaN	O15287	C9JSE3;A0A8Q3WMK6;A0A8Q3WLH9;A0A8Q3SJ04;O15287	FANCG_HUMAN	FANCG	Fanconi anemia group G protein
21.6252	NaN	Q9BY67;Q9BY67-3;Q9BY67-4;Q9BY67-5	H0YG94;A0A0A0MTJ8;A0A087X0T8;A0A087X1W8;Q9BY67-2;Q9BY67-3;Q9BY67-4;Q9BY67-5;F5H125;X5DQS5;Q9BY67	CADM1_HUMAN	CADM1	Cell adhesion molecule 1
21.6277	21.4807	Q5W0V3;Q5W0V3-2	Q5W0V3-2;Q5W0V3	FHI2A_HUMAN	FHIP2A	FHF complex subunit HOOK interacting protein 2A
21.6294	21.562	Q7Z392;Q7Z392-3;Q7Z392-4	Q7Z392-3;Q7Z392-4;Q7Z392	TPC11_HUMAN	TRAPPC11	Trafficking protein particle complex subunit 11
21.6317	NaN	Q9Y4U1	A0A0C4DGU2;Q9Y4U1	MMAC_HUMAN	MMACHC	Cyanocobalamin reductase / alkylcobalamin dealkylase
21.6332	22.0513	C9JDS9	C9JDS9	C9JDS9_HUMAN	TUBA4A	Isoform of P68366, Tubulin alpha 4a (Fragment)
21.6358	20.6513	Q9NUN5;Q9NUN5-2;Q9NUN5-3;Q9NUN5-4	A0A3F2YP66;Q9NUN5-2;Q9NUN5-3;Q9NUN5-4;A0A3B3IRS7;A0A3B3IT31;A0A3B3ITP2;A0A3B3IU68;Q9NUN5	LMBD1_HUMAN	LMBRD1	Lysosomal cobalamin transport escort protein LMBD1
21.6389	21.2079	Q5EBL4	A0A1B0GVV3;Q5EBL4-2;Q5EBL4-3;Q5EBL4	RIPL1_HUMAN	RILPL1	RILP-like protein 1
21.6416	20.2813	Q15047;Q15047-3	Q15047-3;E9PRF4;E9PQM8;A0A8I5KT93;Q15047	SETB1_HUMAN	SETDB1	Histone-lysine N-methyltransferase SETDB1
21.6458	21.2189	Q9BUE0	Q9BUE0	MED18_HUMAN	MED18	Mediator of RNA polymerase II transcription subunit 18
21.6509	19.2034	P49754;P49754-2	P49754-2;P49754-3;P49754	VPS41_HUMAN	VPS41	Vacuolar protein sorting-associated protein 41 homolog
21.6512	18.647	Q9H2H9	F8VX04;Q9H2H9	S38A1_HUMAN	SLC38A1	Sodium-coupled neutral amino acid symporter 1
21.6627	20.9742	Q9NYV4;Q9NYV4-2	Q9NYV4-2;Q9NYV4-3;J3QSD7;Q9NYV4	CDK12_HUMAN	CDK12	Cyclin-dependent kinase 12
21.6633	19.2653	O95544;O95544-2	O95544-2;O95544-3;J3KTI3;A0A0A0MR98;O95544	NADK_HUMAN	NADK	NAD kinase
21.668	22.5291	Q92575	Q92575	UBXN4_HUMAN	UBXN4	UBX domain-containing protein 4
21.6737	20.941	O95625	A0A8I5KRR0;A0A8I5KRB5;A0A994J7A5;O95625	ZBT11_HUMAN	ZBTB11	Zinc finger and BTB domain-containing protein 11
21.6873	20.5378	Q9Y6I4	H0YMI4;H0YKU8;H0YLB7;Q6JHV3;Q9Y6I4-2;Q9Y6I4	UBP3_HUMAN	USP3	Ubiquitin carboxyl-terminal hydrolase 3
21.6932	22.5282	A0A2R8Y6A3	A0A2R8Y6A3	A0A2R8Y6A3_HUMAN	TPM2	Isoform of P07951, Tropomyosin 2 (Fragment)
21.6991	NaN	Q9UHA2	Q9UHA2	S18L2_HUMAN	SS18L2	SS18-like protein 2
21.7027	NaN	Q9NSG2;Q9NSG2-2;Q9NSG2-3	Q9NSG2-2;Q9NSG2-3;Q9NSG2	FIRRM_HUMAN	FIRRM	FIGNL1-interacting regulator of recombination and mitosis
21.7041	20.4404	Q96FT9;Q96FT9-2	Q96FT9-2;Q96FT9-3;Q96FT9-4;A0A7I2V6B2;Q96FT9	IFT43_HUMAN	IFT43	Intraflagellar transport protein 43 homolog
21.7042	17.8051	Q96QD5;Q96QD5-2	Q96QD5-2;Q96QD5	DEPD7_HUMAN	DEPDC7	DEP domain-containing protein 7
21.7045	20.7976	Q13523	Q13523	PRP4B_HUMAN	PRPF4B	Serine/threonine-protein kinase PRP4 homolog
21.7058	15.9743	Q9H7C4;Q9H7C4-2	Q9H7C4-2;Q9H7C4	SYNCI_HUMAN	SYNC	Syncoilin
21.7103	20.8781	Q9Y535;Q9Y535-2	Q9Y535-2;Q9Y535	RPC8_HUMAN	POLR3H	DNA-directed RNA polymerase III subunit RPC8
21.7112	20.909	P50579-2	F8VQZ7;P50579-2	MAP2_HUMAN	METAP2	Isoform of P50579, Isoform 2 of Methionine aminopeptidase 2
21.7223	19.6203	Q6T4R5;Q6T4R5-2	Q6T4R5-2;Q6T4R5-3;Q6T4R5-4;A0A087WU78;Q6T4R5	NHS_HUMAN	NHS	Actin remodeling regulator NHS
21.7234	21.5368	Q9Y2U5	J3KRN4;Q99759-2;J3QRB6;J3QS19;Q9Y2U5;Q99759	M3K2_HUMAN	MAP3K2	Mitogen-activated protein kinase kinase kinase 2
21.727	20.861	Q8N4C8;Q8N4C8-2;Q8N4C8-3;Q8N4C8-4;Q8N4C8-5	Q8N4C8-2;Q8N4C8-3;Q8N4C8-4;Q8N4C8-5;A0A590UJE1;Q8N4C8	MINK1_HUMAN	MINK1	Misshapen-like kinase 1
21.7298	20.8065	Q96CB8	Q96CB8	INT12_HUMAN	INTS12	Integrator complex subunit 12
21.7399	20.0379	Q9Y3D9	Q9Y3D9	RT23_HUMAN	MRPS23	Small ribosomal subunit protein mS23
21.7472	20.8077	Q8IXQ4	A0A0A0MRI1;Q8IXQ4-2;Q8IXQ4-3;Q8IXQ4	GPAM1_HUMAN	GPALPP1	GPALPP motifs-containing protein 1
21.7514	NaN	A0A7P0T9K5;I3L2J0	A0A7P0T9K5;I3L2J0	A0A7P0T9K5_HUMAN;I3L2J0_HUMAN	CIC	Isoform of Q96RK0, Capicua transcriptional repressor
21.7523	20.6597	Q9UKF7;Q9UKF7-2	Q9UKF7-2;A0A0C4DGP0;Q9UKF7	PITC1_HUMAN	PITPNC1	Cytoplasmic phosphatidylinositol transfer protein 1
21.7533	19.2382	Q9UPW5;Q9UPW5-2;Q9UPW5-3	J3KNS1;Q9UPW5-2;Q9UPW5-3;Q9UPW5	CBPC1_HUMAN	AGTPBP1	Cytosolic carboxypeptidase 1
21.7561	22.2994	Q9NVJ2	Q9NVJ2	ARL8B_HUMAN	ARL8B	ADP-ribosylation factor-like protein 8B
21.7564	19.0256	Q9UHX1	H0YEM1;A0A0J9YVP6;A0A0J9YVR6;A0A0J9YWM1;A0A0J9YXC6;A0A0J9YXX5;E9PQ56;E9PN18;E9PMU7;E9PL19;Q9UHX1-2;A0A994J6K6;A0A994J6L7;Q9UHX1	PUF60_HUMAN	PUF60	Poly(U)-binding-splicing factor PUF60
21.7634	17.3471	Q9Y5B6;Q9Y5B6-2	Q9Y5B6-2;Q9Y5B6-3;Q9Y5B6-4;Q9Y5B6	PAXB1_HUMAN	PAXBP1	PAX3- and PAX7-binding protein 1
21.7679	21.1572	Q5BKY9;Q5BKY9-2	G3XAI9;Q5BKY9-2;Q5BKY9	F133B_HUMAN	FAM133B	Protein FAM133B
21.7765	19.6619	Q12873;Q12873-3	A0A5F9ZHX5;A0A8V8TR54;Q12873-2;Q12873-3;K7EPV1;Q12873	CHD3_HUMAN	CHD3	Chromodomain-helicase-DNA-binding protein 3
21.7785	19.2769	Q6ZSS7	C9J134;C9JJH2;C9JAZ7;Q6ZSS7	MFSD6_HUMAN	MFSD6	Major facilitator superfamily domain-containing protein 6
21.782	19.2225	P63316	C9JDI3;P63316	TNNC1_HUMAN	TNNC1	Troponin C, slow skeletal and cardiac muscles
21.7839	19.9916	Q9C040;Q9C040-2	C9J084;A0A6Q8PFM2;A0A6Q8PFI4;A0A6Q8PFB0;A0A6Q8PFE3;A0A6Q8PFX3;A0A6Q8PFS5;A0A6Q8PG79;A0A6Q8PFV0;A0A6Q8PG16;A0A6Q8PGL5;A0A6Q8PGE9;A0A6Q8PGG4;A0A6Q8PGR7;A0A6Q8PGS7;A0A6Q8PH39;A0A6Q8PEY7;A0A6Q8PEY9;A0A6Q8PF63;A0A6Q8PF74;A0A6Q8PF82;A0A6Q8PHP4;A0A6Q8PHG3;A0A6Q8PHE9;A0A6Q8PHR6;A0A0J9YX34;Q9C040-2;A0A6Q8PFL9;A0A6Q8PF18;A0A6Q8PH06;A0A6Q8PHG4;Q9C040	TRIM2_HUMAN	TRIM2	Tripartite motif-containing protein 2
21.7863	20.8756	Q14186	Q5JSB5;Q5JSB6;F5H452;Q14186	TFDP1_HUMAN	TFDP1	Transcription factor Dp-1
21.7951	NaN	Q9NVP2	K7ELW9;Q9NVP2	ASF1B_HUMAN	ASF1B	Histone chaperone ASF1B
21.7988	21.9448	P42574	A8MVM1;C9JXR7;P42574	CASP3_HUMAN	CASP3	Caspase-3
21.8016	19.7235	Q9HB20	Q9HB20	PKHA3_HUMAN	PLEKHA3	Pleckstrin homology domain-containing family A member 3
21.8078	NaN	Q9NV31	Q9NV31	IMP3_HUMAN	IMP3	U3 small nucleolar ribonucleoprotein protein IMP3
21.8089	20.035	A6NKT7;Q7Z3J3	J3KNE0;A0A286YES2;F8VYC4;Q7Z3J3-2;A6NKT7;Q7Z3J3;P0DJD1;P0DJD0	RGPD3_HUMAN;RGPD4_HUMAN	RGPD3;RGPD4	RanBP2-like and GRIP domain-containing protein 3
21.8101	20.3771	P32456	P32456	GBP2_HUMAN	GBP2	Guanylate-binding protein 2
21.8126	20.3872	P35749;P35749-2;P35749-3;P35749-4	P35749-2;P35749-3;P35749-4;P35749	MYH11_HUMAN	MYH11	Myosin-11
21.815	NaN	Q9NRA2;Q9NRA2-2	Q9NRA2-2;Q9NRA2	S17A5_HUMAN	SLC17A5	Sialin
21.8159	19.7015	P19022;P19022-2	C9J126;A0A6Q8PG20;A0A6Q8PF58;A0A6Q8PHJ8;C9JMH2;A0A0G2JRA4;P55283-2;P19022-2;A0A087WX99;P55283;P19022	CADH2_HUMAN	CDH2	Cadherin-2
21.8181	21.1873	Q04844	A0A3B3IRM1;Q04844	ACHE_HUMAN	CHRNE	Acetylcholine receptor subunit epsilon
21.8184	18.3526	Q9BY41;Q9BY41-4;Q9BY41-5	A6NGJ7;A6NFW1;E7EVA8;Q9BY41-4;Q9BY41-5;Q9BY41-6;A6NMT1;A0A3B3IRZ0;A0A3B3IRZ8;A0A3B3IRP8;A0A3B3IS68;A0A3B3ISJ4;A0A3B3IT04;A0A3B3ISE4;A0A3B3IT30;A0A3B3ISS7;A0A3B3IT84;A0A3B3IT95;A0A3B3IU01;A0A3B3IU62;A0A3B3ITZ3;A0A3B3IRI9;A0A3B3IRV1;Q9BY41	HDAC8_HUMAN	HDAC8	Histone deacetylase 8
21.8231	21.6304	Q9NZM3;Q9NZM3-2	Q9NZM3-2;Q9NZM3-3;Q9NZM3-4;E7EPJ2;Q9NZM3	ITSN2_HUMAN	ITSN2	Intersectin-2
21.8336	NaN	O00165;O00165-2;O00165-5	O00165-2;O00165-3;O00165-5;A0A8V8TKG6;E9PIQ7;A0A8V8TLX9;O00165	HAX1_HUMAN	HAX1	HCLS1-associated protein X-1
21.8337	19.1284	P56962	E9PQU9;E9PJV6;E9PJW1;E9PIC2;P56962	STX17_HUMAN	STX17	Syntaxin-17
21.8391	21.016	P20336	S4R3Q3;P20336	RAB3A_HUMAN	RAB3A	Ras-related protein Rab-3A
21.8486	20.9257	Q0VDG4;Q0VDG4-2	Q0VDG4-2;Q0VDG4	SCRN3_HUMAN	SCRN3	Secernin-3
21.8517	18.8841	Q8IZA0;Q8IZA0-2	Q8IZA0-2;H0Y4S8;A0A8V8TKK6;A0A8V8TKL0;A0A8V8TKL4;A0A8V8TKM4;A0A8V8TM29;A0A8V8TM39;A0A8V8TLU1;A0A8V8TLV0;B1AN15;A0A8V8TKX7;A0A8V8TKY4;A0A8V8TM14;E7EN73;Q8IZA0	K319L_HUMAN	KIAA0319L	Dyslexia-associated protein KIAA0319-like protein
21.8562	17.3044	O95297;O95297-2;O95297-4	O95297-2;O95297-4;O95297	MPZL1_HUMAN	MPZL1	Myelin protein zero-like protein 1
21.862	21.5576	Q9H4A5;Q9H4A5-2	Q9H4A5-2;Q5T5I6;Q9H4A5	GLP3L_HUMAN	GOLPH3L	Golgi phosphoprotein 3-like
21.8656	19.6964	A0A0D9SFE4	A0A0D9SFE4	A0A0D9SFE4_HUMAN	DNM1	Isoform of Q05193, dynamin GTPase
21.8679	18.5789	Q92585	Q92585	MAML1_HUMAN	MAML1	Mastermind-like protein 1
21.8698	17.02	P32004;P32004-2;P32004-3	P32004-2;P32004-3;P32004	L1CAM_HUMAN	L1CAM	Neural cell adhesion molecule L1
21.8742	20.8131	Q99633	Q5T9P7;Q5T9P8;M0R3G1;Q99633	PRP18_HUMAN	PRPF18	Pre-mRNA-splicing factor 18
21.8752	15.9947	Q7Z4L5	A0A7P0T9H7;A0A7P0T8P4;A0A7P0T962;A0A7P0T968;A0A7P0TB61;Q7Z4L5-2;A0A7P0TB56;A0A7P0TBE5;A0A7P0TBF6;A0A7P0TA66;A0A7P0TAA5;A0A7P0TAJ8;A0A7P0TAK1;A0A7P0Z487;A0A7P0Z4B3;A0A494C0N4;Q7Z4L5	TT21B_HUMAN	TTC21B	Tetratricopeptide repeat protein 21B
21.8761	20.5662	Q12959;Q12959-3;Q12959-5;Q12959-6;Q12959-7;Q12959-8;Q12959-9	E7EQD7;C9JUA9;A0A590UKA8;A0A590UJR4;A0A590UJS9;A0A590UK48;A0A590UJR5;A0A590UJX2;A0A590UK70;A0A590UK81;A0A590UJL2;A0A590UK02;A0A590UJC5;A0A590UJD9;A0A590UJ81;A0A590UJ08;A0A590UJ18;A0A590UJ25;A0A590UJ29;A0A590UJ64;A0A590UJ68;Q12959-6;Q12959-7;Q12959-8;Q12959-9;Q12959-2;Q12959-3;Q12959-4;Q12959-5;A0A0C4DFT3;Q12959	DLG1_HUMAN	DLG1	Disks large homolog 1
21.8792	20.9509	Q5VU43-13	Q5VU43-2;Q5VU43-3;Q5VU43-4;Q5VU43-6;Q5VU43-7;A0A075B749;Q5VU43-13;E9PQG4;A0A8Q3WM32;A0A8Q3SI83;A0A8Q3SI21;A0A994J5E0;A0A087WX83;Q5VU43	MYOME_HUMAN	PDE4DIP	Isoform of Q5VU43, Isoform 13 of Myomegalin
21.8804	20.88	Q9UGP4	C9JRJ5;Q9UGP4	LIMD1_HUMAN	LIMD1	LIM domain-containing protein 1
21.8821	21.3766	O95379-3	D6RCM8;O95379-2;O95379-3;O95379-4;O95379	TFIP8_HUMAN	TNFAIP8	Isoform of O95379, Isoform 3 of Tumor necrosis factor alpha-induced protein 8
21.8835	NaN	Q9BTM9;Q9BTM9-2;Q9BTM9-3	Q9BTM9-2;Q9BTM9-3;Q9BTM9	URM1_HUMAN	URM1	Ubiquitin-related modifier 1
21.8843	22.3028	Q96RL1	Q96RL1-2;Q96RL1-3;Q96RL1-4;Q96RL1	UIMC1_HUMAN	UIMC1	BRCA1-A complex subunit RAP80
21.8928	24.1787	Q9GZT3;Q9GZT3-2	Q9GZT3-2;Q9GZT3	SLIRP_HUMAN	SLIRP	SRA stem-loop-interacting RNA-binding protein, mitochondrial
21.8939	18.5599	O14593	H0YFZ0;O14593-2;O14593-3;A0A024R7P0;O14593	RFXK_HUMAN	RFXANK	DNA-binding protein RFXANK
21.8949	19.7668	Q8IZQ1;Q8IZQ1-2	H0Y9T6;Q8IZQ1-2;Q8IZQ1	WDFY3_HUMAN	WDFY3	WD repeat and FYVE domain-containing protein 3
21.8981	NaN	Q9Y520-6	Q9Y520-4;Q9Y520-6;E7EPN9;H7C5N8	PRC2C_HUMAN	PRRC2C	Isoform of Q9Y520, Isoform 6 of Protein PRRC2C
21.8984	20.0296	Q969L4	Q969L4	LSM10_HUMAN	LSM10	U7 snRNA-associated Sm-like protein LSm10
21.8985	18.6226	Q96RY7	Q96RY7	IF140_HUMAN	IFT140	Intraflagellar transport protein 140 homolog
21.9016	19.566	Q9Y679	Q9Y679-3;Q9Y679	AUP1_HUMAN	AUP1	Lipid droplet-regulating VLDL assembly factor AUP1
21.9044	19.817	Q86YB8	A0A8I5KWQ1;Q86YB8	ERO1B_HUMAN	ERO1B	ERO1-like protein beta
21.9072	21.1171	Q8IWD4;Q8IWD4-3;Q8IWD4-4	B0QYH3;Q8IWD4-2;Q8IWD4-3;Q8IWD4-4;Q8IWD4	CC117_HUMAN	CCDC117	Coiled-coil domain-containing protein 117
21.911	21.2379	Q96T23;Q96T23-2	H0YER1;H0YCN2;Q96T23-2;Q96T23-3;Q96T23	RSF1_HUMAN	RSF1	Remodeling and spacing factor 1
21.9111	20.9294	Q9NXV2	Q9NXV2	KCTD5_HUMAN	KCTD5	BTB/POZ domain-containing protein KCTD5
21.9173	21.1417	Q9UHQ1;Q9UHQ1-2;Q9UHQ1-3;Q9UHQ1-4	J3KTG5;Q9UHQ1-2;Q9UHQ1-3;Q9UHQ1-4;E7EP87;Q9H6Q4-2;Q9H6Q4-3;Q9UHQ1;Q9H6Q4	NARF_HUMAN	NARF	Nuclear prelamin A recognition factor
21.9241	20.1452	Q8TBF4	F8VXY6;Q8TBF4	ZCRB1_HUMAN	ZCRB1	Zinc finger CCHC-type and RNA-binding motif-containing protein 1
21.9258	20.9977	O43823	A0A7P0T893;A0A7P0TBC8;M0QX51;O43823	AKAP8_HUMAN	AKAP8	A-kinase anchor protein 8
21.9272	18.8488	Q14147	Q14147	DHX34_HUMAN	DHX34	Probable ATP-dependent RNA helicase DHX34
21.9285	20.0122	Q92562	A0A6Q8PG59;A0A6Q8PGC1;A0A6Q8PGY7;A0A6Q8PHA1;A0A6Q8PGW5;A0A6Q8PGP4;A0A6Q8PGW0;A0A6Q8PF27;A0A6Q8PF62;A0A6Q8PF70;A0A6Q8PHP5;A0A6Q8PHC7;A0A6Q8PHH5;H0Y6G7;Q92562	FIG4_HUMAN	FIG4	Polyphosphoinositide phosphatase
21.9319	20.553	Q5HYJ3	Q5HYJ3-2;Q5HYJ3-3;F5GX09;Q5HYJ3	FA76B_HUMAN	FAM76B	Protein FAM76B
21.9361	20.2332	Q14318;Q14318-2	Q14318-2;Q14318-3;A0A0A0MTJ1;U3KQI1;Q14318	FKBP8_HUMAN	FKBP8	Peptidyl-prolyl cis-trans isomerase FKBP8
21.9373	20.2875	P27540;P27540-3;P27540-4	P27540-2;P27540-3;P27540-4;P27540	ARNT_HUMAN	ARNT	Aryl hydrocarbon receptor nuclear translocator
21.9393	20.6471	Q13495;Q13495-3;Q13495-4	A0A8C8KAR0;A0A804HJ96;A0A804HJD4;A0A804HKM8;Q13495-3;Q13495-4;Q13495	MAMD1_HUMAN	MAMLD1	Mastermind-like domain-containing protein 1
21.9426	18.0815	Q99504;Q99504-3;Q99504-5	Q99504-2;Q99504-3;Q99504-4;Q99504-5;B1APR7;Q99504	EYA3_HUMAN	EYA3	Eyes absent homolog 3
21.9429	21.7053	Q92896;Q92896-2;Q92896-3	Q92896-2;Q92896-3;H3BRD8;H3BQU9;H3BM42;Q92896	GSLG1_HUMAN	GLG1	Golgi apparatus protein 1
21.9475	20.6172	Q13426-2	Q13426-2	XRCC4_HUMAN	XRCC4	Isoform of Q13426, Isoform 2 of DNA repair protein XRCC4
21.9477	22.2227	Q9NYD6	D6RAG4;V9GYH0;Q9NYD6	HXC10_HUMAN	HOXC10	Homeobox protein Hox-C10
21.9481	17.6876	O00268	A0A0G2JRY5;A0A8I5KRH3;O00268	TAF4_HUMAN	TAF4	Transcription initiation factor TFIID subunit 4
21.9489	17.9518	P11234;P11234-2;P11234-3	C9J6B1;C9JQB3;P11234-2;P11234-3;P11234	RALB_HUMAN	RALB	Ras-related protein Ral-B
21.9523	19.6707	Q9NXG0;Q9NXG0-2	Q9NXG0-2;Q9NXG0	CNTLN_HUMAN	CNTLN	Centlein
21.9528	18.9416	P22736;P22736-2	P22736-2;F5GXF0;P22736	NR4A1_HUMAN	NR4A1	Nuclear receptor subfamily 4 group A member 1
21.9573	19.3679	P83876	O14835;K7EJU2;K7EMX5;K7EPA6;K7ES07;P83876	TXN4A_HUMAN	TXNL4A	Thioredoxin-like protein 4A
21.9587	18.2804	Q7Z6V5	Q7Z6V5-2;Q7Z6V5	ADAT2_HUMAN	ADAT2	tRNA-specific adenosine deaminase 2
21.9592	19.7826	Q9BUB5;Q9BUB5-2;Q9BUB5-3	Q9BUB5-2;Q9BUB5-3;A0A499FJN1;A0A499FIS5;A0A499FJS1;E9PSE0;E9PLE7;E9PN34;E9PMM8;E9PIA0;Q9BUB5	MKNK1_HUMAN	MKNK1	MAP kinase-interacting serine/threonine-protein kinase 1
21.9604	19.394	Q92930	H0YNE9;Q92930	RAB8B_HUMAN	RAB8B	Ras-related protein Rab-8B
21.964	20.0369	Q9UHY8;Q9UHY8-2	Q9UHY8-2;H7C434;H7C0W1;H7C0L4;Q7Z674;Q9UHY8	FEZ2_HUMAN	FEZ2	Fasciculation and elongation protein zeta-2
21.9655	20.5656	Q14692	Q14692	BMS1_HUMAN	BMS1	Ribosome biogenesis protein BMS1 homolog
21.9661	21.2921	Q6ZSJ8	Q6ZSJ8-2;Q6ZSJ8	CA122_HUMAN	C1orf122	Uncharacterized protein C1orf122
21.9665	NaN	Q9Y666	A0A0U1RR18;A0A0G2JNW7;Q9Y666	S12A7_HUMAN	SLC12A7	Solute carrier family 12 member 7
21.9673	18.876	Q08379	Q08379-2;A0A8I5QJQ7;A0A6Q8KRG2;B7ZC06;A0A1W2PQY5;A0A8J9BZL8;A0A8I5KNZ1;A0A8I5KT73;A0A8I5KZ68;A0A087WYC0;Q08379	GOGA2_HUMAN	GOLGA2	Golgin subfamily A member 2
21.9789	NaN	Q9BUT9	Q9BUT9-2;I3L172;Q9BUT9	MCRI2_HUMAN	MCRIP2	MAPK regulated corepressor interacting protein 2
21.9804	18.8924	O00635	O00635	TRI38_HUMAN	TRIM38	E3 ubiquitin-protein ligase TRIM38
21.9829	20.7707	Q5H9K5	A0A494C0A7;Q5H9K5	ZMAT1_HUMAN	ZMAT1	Zinc finger matrin-type protein 1
21.9841	23.7749	Q15274	Q15274	NADC_HUMAN	QPRT	Nicotinate-nucleotide pyrophosphorylase [carboxylating]
21.985	18.7531	Q4LE39;Q4LE39-2;Q4LE39-3	H0Y7Y8;H7C5R6;Q4LE39-2;Q4LE39-3;Q4LE39-4;Q4LE39	ARI4B_HUMAN	ARID4B	AT-rich interactive domain-containing protein 4B
21.9866	NaN	Q9Y5U2;Q9Y5U2-2	A6NCC9;C9JJV1;C9JHT9;E9PME3;Q9Y5U2-2;Q9Y5U2	TSSC4_HUMAN	TSSC4	U5 small nuclear ribonucleoprotein TSSC4
21.9871	17.6373	Q8N3P4;Q8N3P4-3	C9JJN9;Q8N3P4-2;Q8N3P4-3;Q8N3P4	VPS8_HUMAN	VPS8	Vacuolar protein sorting-associated protein 8 homolog
21.9872	18.6005	P51159	H3BVH7;H3BU81;H3BUD9;H3BS49;H3BN55;P51159-2;P51159	RB27A_HUMAN	RAB27A	Ras-related protein Rab-27A
21.9898	21.4632	O94817	O94817	ATG12_HUMAN	ATG12	Ubiquitin-like protein ATG12
21.9936	19.2025	A0A8Q3WKT6	A0A8Q3WKT6	A0A8Q3WKT6_HUMAN	CD55	Isoform of P08174, CD55 molecule (Cromer blood group)
21.9946	22.5632	Q9NR19;Q9NR19-2	Q9NR19-2;Q9NR19	ACSA_HUMAN	ACSS2	Acetyl-coenzyme A synthetase, cytoplasmic
22.0008	21.2026	Q9ULD2;Q9ULD2-2	H0YC63;Q9ULD2-2;Q9ULD2-5;Q9ULD2	MTUS1_HUMAN	MTUS1	Microtubule-associated tumor suppressor 1
22.001	19.4522	Q96T37;Q96T37-2;Q96T37-3;Q96T37-4	A0A499FJY3;A0A494C001;Q96T37-2;Q96T37-3;Q96T37-4;A0A087WWP4;Q96T37	RBM15_HUMAN	RBM15	RNA-binding protein 15
22.0015	20.1309	Q96MF7	A0A087WTZ8;E5RHW9;E5RIM1;E5RFJ1;Q96MF7	NSE2_HUMAN	NSMCE2	E3 SUMO-protein ligase NSE2
22.0038	19.9094	Q9NYS0	G5E9P3;Q9NYS0	KBRS1_HUMAN	NKIRAS1	NF-kappa-B inhibitor-interacting Ras-like protein 1
22.0043	19.3684	Q8N157;Q8N157-2	A0A7P0T9G0;A0A7P0T9I7;A0A7P0T9M6;A0A7P0T9Q2;A0A7P0T9X6;A0A7P0T8H6;A0A7P0T959;A0A7P0T880;A0A7P0T7Z8;A0A7P0TB99;A0A7P0TBA0;A0A7P0TBL6;A0A7P0TA48;A0A7P0TAL4;Q9NQN3;E9PML3;A0A7P0Z4K9;A0A7P0Z493;Q8N157-2;Q8N157-3;E9PI51;Q8N157	AHI1_HUMAN	AHI1	Jouberin
22.0094	20.5738	A0JNW5	A0JNW5-2;A0JNW5	BLT3B_HUMAN	BLTP3B	Bridge-like lipid transfer protein family member 3B
22.0108	21.592	Q6VMQ6;Q6VMQ6-2;Q6VMQ6-4;Q6VMQ6-5	Q6VMQ6-2;Q6VMQ6-4;Q6VMQ6-5;F5GYR7;Q6VMQ6	MCAF1_HUMAN	ATF7IP	Activating transcription factor 7-interacting protein 1
22.0149	18.7177	P35240;P35240-2;P35240-3;P35240-4;P35240-5;P35240-6;P35240-8	A0A5K1VW66;P35240-2;P35240-3;P35240-4;P35240-5;P35240-6;P35240-8;P35240	MERL_HUMAN	NF2	Merlin
22.0174	21.1971	Q6ZMW3;Q6ZMW3-2	Q6ZMW3-2;A0A669KBD4;Q6ZMW3	EMAL6_HUMAN	EML6	Echinoderm microtubule-associated protein-like 6
22.0218	21.3606	H3BPS8	H3BPS8	H3BPS8_HUMAN	ALDOA	Isoform of P04075, fructose-bisphosphate aldolase (Fragment)
22.0224	21.2421	P18583;P18583-10;P18583-2;P18583-3;P18583-4;P18583-5;P18583-7;P18583-9	P18583-2;P18583-3;P18583-4;P18583-5;P18583-6;P18583-7;P18583-8;P18583-9;P18583-10;P18583	SON_HUMAN	SON	Protein SON
22.0237	18.6672	Q8IY37	F5H3Y4;Q8IY37	DHX37_HUMAN	DHX37	Probable ATP-dependent RNA helicase DHX37
22.0246	19.8045	Q9Y3S2	D6RBS7;D6RBR7;D6RCK7;D6R9C8;D6R8Y9;Q9Y3S2	ZN330_HUMAN	ZNF330	Zinc finger protein 330
22.031	18.9524	Q96RT1;Q96RT1-2;Q96RT1-3;Q96RT1-4;Q96RT1-5;Q96RT1-6;Q96RT1-7;Q96RT1-8;Q96RT1-9	Q96RT1-2;Q96RT1-3;Q96RT1-4;Q96RT1-5;Q96RT1-6;Q96RT1-7;Q96RT1-8;Q96RT1-9;H0YA04;A0A8V8TPC7;A0A8V8TPD2;A0A8V8TP04;A0A8V8TP09;A0A8V8TML0;A0A8V8TML4;A0A8V8TML6;A0A8V8TN23;Q96RT1	ERBIN_HUMAN	ERBIN	Erbin
22.0317	22.5723	Q96KA5;Q96KA5-2	G5E9Z2;Q96KA5-2;Q96KA5	CLP1L_HUMAN	CLPTM1L	Lipid scramblase CLPTM1L
22.0333	21.4937	Q7Z3J2;Q7Z3J2-2	E7EWW0;H3BVG8;F5H7K1;Q7Z3J2-2;Q7Z3J2	VP35L_HUMAN	VPS35L	VPS35 endosomal protein-sorting factor-like
22.0338	19.0654	P24539	Q5QNZ2;P24539	AT5F1_HUMAN	ATP5PB	ATP synthase F(0) complex subunit B1, mitochondrial
22.0359	19.048	Q9H7Z3	H0YJT6;Q9H7Z3	NRDE2_HUMAN	NRDE2	Nuclear exosome regulator NRDE2
22.0367	20.5934	Q9H9B1;Q9H9B1-3;Q9H9B1-4	A0A1B0GV09;A0A1B0GUD1;A0A1B0GU48;A0A1B0GW79;A0A1B0GVZ8;A0A0D9SEP2;A0A0D9SEQ1;A0A0D9SER3;A0A0D9SFX4;A0A0D9SFG7;A0A0D9SFS4;Q9H9B1-3;Q9H9B1-4;Q9H9B1	EHMT1_HUMAN	EHMT1	Histone-lysine N-methyltransferase EHMT1
22.0392	19.5058	Q14344;Q14344-2	Q14344-2;Q14344	GNA13_HUMAN	GNA13	Guanine nucleotide-binding protein subunit alpha-13
22.0392	19.1398	Q8IUF8	Q8IUF8-3;Q8IUF8	RIOX2_HUMAN	RIOX2	Ribosomal oxygenase 2
22.0417	19.4602	P40424;P40424-2;P40424-3	P40424-2;P40424-3;H0YLT4;H0YLM3;H0YKH1;H0YLD4;H0YLF5;H0YLB0;F8WA05;P40424;P40425	PBX1_HUMAN	PBX1	Pre-B-cell leukemia transcription factor 1
22.0419	18.9553	Q86WH2	A0A1B0GUG6;Q86WH2	RASF3_HUMAN	RASSF3	Ras association domain-containing protein 3
22.0445	21.5214	Q7Z3E2	H0Y7V5;Q7Z3E2	CC186_HUMAN	CCDC186	Coiled-coil domain-containing protein 186
22.0481	19.0867	Q10570	Q10570	CPSF1_HUMAN	CPSF1	Cleavage and polyadenylation specificity factor subunit 1
22.0483	21.4517	O60669	O60669	MOT2_HUMAN	SLC16A7	Monocarboxylate transporter 2
22.0504	17.8486	Q12834	Q12834	CDC20_HUMAN	CDC20	Cell division cycle protein 20 homolog
22.0512	19.8292	Q96Q45;Q96Q45-2;Q96Q45-3;Q96Q45-5	A0A087WWU1;Q96Q45-2;Q96Q45-3;Q96Q45-5;Q96Q45	TM237_HUMAN	TMEM237	Transmembrane protein 237
22.0561	20.9749	P57764	G3V1A6;E9PIB2;P57764	GSDMD_HUMAN	GSDMD	Gasdermin-D
22.0649	22.2445	Q8N668;Q8N668-2	Q8N668-2;H7C169;Q8N668	COMD1_HUMAN	COMMD1	COMM domain-containing protein 1
22.0652	19.0744	Q9H8T0;Q9H8T0-2	H3BVH0;H3BRV2;H3BNB8;H3BM79;Q9H8T0-2;Q9H8T0	AKTIP_HUMAN	AKTIP	AKT-interacting protein
22.0657	20.2059	O75190;O75190-2;O75190-3	C9J2C4;C9J2P2;F8WCZ4;C9JN01;C9JDR7;C9JDX6;C9JB42;A0A0J9YX62;O75190-2;O75190-3;E9PH18;O75190	DNJB6_HUMAN	DNAJB6	DnaJ homolog subfamily B member 6
22.0665	21.1227	P49662;P49662-2;P49662-4	P49662-2;P49662-4;E9PMT1;P49662	CASP4_HUMAN	CASP4	Caspase-4
22.0744	19.9344	Q99576-3	E7EWD5;Q5JRJ0;Q99576-3;Q99576-5;A0A8I5KT94;Q99576	T22D3_HUMAN	TSC22D3	Isoform of Q99576, Isoform 2 of TSC22 domain family protein 3
22.0798	22.818	Q86W92;Q86W92-3;Q86W92-4	Q86W92-2;Q86W92-3;Q86W92-4;H0YFE4;Q8ND30-2;Q8ND30-3;A0A804HJY3;A0A804HKA2;E9PP16;F5GZP6;Q86W92;Q8ND30	LIPB1_HUMAN	PPFIBP1	Liprin-beta-1
22.081	21.5186	Q9NP74	S4R313;Q9NP74-2;Q9NP74-3;Q9NP74	PALMD_HUMAN	PALMD	Palmdelphin
22.0819	18.7155	Q8TCT9;Q8TCT9-2;Q8TCT9-5	A0A0S2Z6F0;A0A075B6F6;Q8TCT9-4;Q8TCT9-5;Q8TCT9-2;A0A3B3IT72;A0A3B3IUB5;Q8TCT9	HM13_HUMAN	HM13	Minor histocompatibility antigen H13
22.0839	20.6648	O43402;O43402-2	O43402-2;O43402	EMC8_HUMAN	EMC8	ER membrane protein complex subunit 8
22.0899	18.1098	Q14012	H7C071;Q14012	KCC1A_HUMAN	CAMK1	Calcium/calmodulin-dependent protein kinase type 1
22.0914	21.7141	Q9HCG8	B7WP74;Q9HCG8	CWC22_HUMAN	CWC22	Pre-mRNA-splicing factor CWC22 homolog
22.0937	NaN	Q9NRG9	H3BU82;F8VZ44;Q9NRG9	AAAS_HUMAN	AAAS	Aladin
22.0942	18.9151	Q8NHU6;Q8NHU6-2	Q8NHU6-2;Q8NHU6	TDRD7_HUMAN	TDRD7	Tudor domain-containing protein 7
22.0942	20.9375	Q9BYX2;Q9BYX2-2;Q9BYX2-3	Q9BYX2-2;Q9BYX2-3;Q9BYX2	TBD2A_HUMAN	TBC1D2	TBC1 domain family member 2A
22.0987	21.6047	Q9H1P3;Q9H1P3-2	A0A2R8Y362;A0A2R8Y690;A0A2R8Y5R1;E7ET92;A0A2R8YDU7;A0A2R8YD49;A0A2R8YG59;A0A2R8YEX0;Q9H1P3-2;Q9H1P3	OSBL2_HUMAN	OSBPL2	Oxysterol-binding protein-related protein 2
22.1022	20.6735	Q9NV88;Q9NV88-2;Q9NV88-3	Q9NV88-2;Q9NV88-3;G3XAN1;Q9NV88	INT9_HUMAN	INTS9	Integrator complex subunit 9
22.105	21.1834	Q96S66;Q96S66-2;Q96S66-3;Q96S66-4	A0A6Q8PFF7;A0A6Q8PG75;A0A6Q8PG30;A0A6Q8PG14;A0A6Q8PGA4;A0A6Q8PEZ7;A0A6Q8PHQ1;Q96S66-2;Q96S66-3;Q96S66-4;A0A8I5KRC0;Q96S66	CLCC1_HUMAN	CLCC1	Chloride channel CLIC-like protein 1
22.1066	17.9809	Q9UHN6;Q9UHN6-2	B4E1B9;Q9UHN6-2;Q9UHN6	CEIP2_HUMAN	CEMIP2	Cell surface hyaluronidase
22.107	22.3314	P15529-16;P15529-2;P15529-3;P15529-4;P15529-5;P15529-6;P15529-7	P15529-16;P15529-2;P15529-3;P15529-4;P15529-5;P15529-6;P15529-7;R4GN18	MCP_HUMAN	CD46	Isoform of P15529, Isoform 3 of Membrane cofactor protein
22.1082	19.1566	Q3T8J9;Q3T8J9-2;Q3T8J9-3	Q3T8J9-2;Q3T8J9-3;A0A087WUE6;Q9H869-2;Q9H869-3;Q9H869-4;Q9H869-5;Q9H869-6;Q9H869-7;Q9H869-8;Q9H869-9;Q3T8J9;Q9H869	GON4L_HUMAN	GON4L	GON-4-like protein
22.1091	20.7475	P18440	F5H5R8;P18440	ARY1_HUMAN	NAT1	Arylamine N-acetyltransferase 1
22.1127	21.0946	Q96Q05;Q96Q05-2;Q96Q05-3	Q96Q05-2;Q96Q05-3;H0YBR0;Q96Q05	TPPC9_HUMAN	TRAPPC9	Trafficking protein particle complex subunit 9
22.1148	20.2243	P53814;P53814-5;P53814-6	P53814-5;P53814-6;A0A087X1R1;A0A087WVP4;P53814	SMTN_HUMAN	SMTN	Smoothelin
22.1155	20.6214	Q9UMX1	Q9UMX1	SUFU_HUMAN	SUFU	Suppressor of fused homolog
22.1216	18.7184	O75879	D6REA0;O75879	GATB_HUMAN	GATB	Glutamyl-tRNA(Gln) amidotransferase subunit B, mitochondrial
22.1223	21.1253	Q8N2M8;Q8N2M8-3	Q8N2M8-3;Q8N2M8-4;A0A0A0MQS2;F5H0Q6;Q8N2M8	CLASR_HUMAN	CLASRP	CLK4-associating serine/arginine rich protein
22.1233	21.7064	Q8TF01	Q8TF01-2;A0A2R8Y2Y1;A0A7P0T9Z6;A0A7P0Z4K1;Q8TF01	PNISR_HUMAN	PNISR	Arginine/serine-rich protein PNISR
22.1293	21.921	P43378	P43378	PTN9_HUMAN	PTPN9	Tyrosine-protein phosphatase non-receptor type 9
22.1308	NaN	Q9NRX1	Q9NRX1	PNO1_HUMAN	PNO1	RNA-binding protein PNO1
22.1308	21.3946	O15318	A0A7I2R591;D6RJH6;D6RIT0;D6R9U7;O15318	RPC7_HUMAN	POLR3G	DNA-directed RNA polymerase III subunit RPC7
22.1318	NaN	Q9UL18	Q5TA58;A0A6I8PTZ8;A0A8V8TQA7;A0A8V8TNY0;Q9UL18	AGO1_HUMAN	AGO1	Protein argonaute-1
22.1321	21.1354	Q8N5F7	A0A494C050;Q5M9Q1;Q8N5F7	NKAP_HUMAN	NKAP	NF-kappa-B-activating protein
22.1351	19.3394	Q9BVS5	H7C2E8;Q9BVS5	TR61B_HUMAN	TRMT61B	tRNA (adenine(58)-N(1))-methyltransferase, mitochondrial
22.1415	19.8094	Q6ZWJ1	E7EPP7;B5MCT9;Q6ZWJ1	STXB4_HUMAN	STXBP4	Syntaxin-binding protein 4
22.143	19.6952	Q92686	Q92686	NEUG_HUMAN	NRGN	Neurogranin
22.1433	17.0618	Q86US8	Q86US8-2;Q86US8-3;I3L390;Q86US8	EST1A_HUMAN	SMG6	Telomerase-binding protein EST1A
22.144	19.076	P11831	P11831	SRF_HUMAN	SRF	Serum response factor
22.1462	22.5602	Q9UPY8	Q9UPY8-2;C9JB30;Q9UPY8	MARE3_HUMAN	MAPRE3	Microtubule-associated protein RP/EB family member 3
22.1464	21.1499	O43184;O43184-2;O43184-3;O43184-4	Q5JRP2;O43184-2;O43184-3;O43184-4;O43184	ADA12_HUMAN	ADAM12	Disintegrin and metalloproteinase domain-containing protein 12
22.1479	20.5995	Q5UIP0;Q5UIP0-2	Q5UIP0-2;H7C2B5;Q5UIP0	RIF1_HUMAN	RIF1	Telomere-associated protein RIF1
22.148	NaN	Q9H579-2	Q9H579-2;Q5JYQ9;A0A8V8TLY2	MROH8_HUMAN	MROH8	Isoform of Q9H579, Isoform 2 of Protein MROH8
22.1492	19.1335	P30307	P30307-2;P30307-3;P30307-4;P30307	MPIP3_HUMAN	CDC25C	M-phase inducer phosphatase 3
22.1522	19.334	Q12872;Q12872-2	H0YFR9;Q12872-2;Q12872	SFSWA_HUMAN	SFSWAP	Splicing factor, suppressor of white-apricot homolog
22.1531	15.2691	Q9H0H0	J3KMZ7;Q9H0H0	INT2_HUMAN	INTS2	Integrator complex subunit 2
22.1558	NaN	O60499;O60499-2	Q5U8S2;K7EIY4;K7EJ05;O60499-2;K7ELY2;K7EPP9;K7EQ84;X6R2W0;O60499	STX10_HUMAN	STX10	Syntaxin-10
22.1573	21.3816	Q15287	H3BV80;H3BUL0;H3BTV0;H3BTR6;H3BUG0;H3BTY0;H3BTC0;H3BRK4;H3BP82;H3BNI3;H3BNU7;H3BMM9;Q15287	RNPS1_HUMAN	RNPS1	RNA-binding protein with serine-rich domain 1
22.1597	21.4169	P55212	D6RBM3;P55212	CASP6_HUMAN	CASP6	Caspase-6
22.1663	21.1564	Q9BXL6;Q9BXL6-2	A0A494BZY0;A0A494C1N2;A0A494C199;A0A494C0J4;I3L414;Q9BXL6-2;A0A994J6G4;Q9BXL6	CAR14_HUMAN	CARD14	Caspase recruitment domain-containing protein 14
22.171	20.2822	P41208	Q12798;P41208	CETN2_HUMAN	CETN2	Centrin-2
22.172	21.348	O96017;O96017-13;O96017-4;O96017-9	A0A7P0MUT5;O96017-11;O96017-12;O96017-13;H0Y820;H0Y4V6;O96017-3;O96017-4;O96017-9;A0A087X102;O96017	CHK2_HUMAN	CHEK2	Serine/threonine-protein kinase Chk2
22.1724	19.3144	Q8IWQ3;Q8IWQ3-2;Q8IWQ3-3;Q8IWQ3-4	Q8IWQ3-2;Q8IWQ3-3;Q8IWQ3-4;Q8IWQ3-5;Q8IWQ3-6;Q8IWQ3	BRSK2_HUMAN	BRSK2	Serine/threonine-protein kinase BRSK2
22.1757	17.5369	Q9P2B2	Q9P2B2	FPRP_HUMAN	PTGFRN	Prostaglandin F2 receptor negative regulator
22.1763	20.7239	Q86V48;Q86V48-2;Q86V48-3	Q86V48-2;Q86V48-3;Q86V48	LUZP1_HUMAN	LUZP1	Leucine zipper protein 1
22.1785	21.4881	Q86V25;Q86V25-2;Q86V25-6	Q86V25-2;Q86V25-3;Q86V25-4;Q86V25-6;Q86V25	VASH2_HUMAN	VASH2	Tubulinyl-Tyr carboxypeptidase 2
22.1792	20.2071	A5D8V6	F5H4Q5;A5D8V6	VP37C_HUMAN	VPS37C	Vacuolar protein sorting-associated protein 37C
22.1811	18.7928	Q9HAW4	E7ESG2;Q9HAW4-2;Q9HAW4-3;Q9HAW4	CLSPN_HUMAN	CLSPN	Claspin
22.1814	21.9281	Q8N3R9	Q8N3R9-2;Q8N3R9	PALS1_HUMAN	PALS1	Protein PALS1
22.1836	21.2623	P46020;P46020-2	A6NMN0;A6NIT2;P46020-2;P46020-3;P46020	KPB1_HUMAN	PHKA1	Phosphorylase b kinase regulatory subunit alpha, skeletal muscle isoform
22.1873	20.3277	O94900	O94900	TOX_HUMAN	TOX	Thymocyte selection-associated high mobility group box protein TOX
22.1898	17.2772	Q9NZM5	Q9NZM5	NOP53_HUMAN	NOP53	Ribosome biogenesis protein NOP53
22.1918	16.3091	Q00013;Q00013-2;Q00013-3	Q00013-2;Q00013-3;Q00013	EM55_HUMAN	MPP1	55 kDa erythrocyte membrane protein
22.1944	19.0643	P18074	A0A804HK53;P18074	ERCC2_HUMAN	ERCC2	General transcription and DNA repair factor IIH helicase subunit XPD
22.1959	17.6217	Q9C0E8;Q9C0E8-2;Q9C0E8-4	Q9C0E8-2;Q9C0E8-3;Q9C0E8-4;Q9C0E8	LNP_HUMAN	LNPK	Endoplasmic reticulum junction formation protein lunapark
22.1973	15.6656	Q8N201	Q8N201	INT1_HUMAN	INTS1	Integrator complex subunit 1
22.2021	20.4992	P12236	P12236	ADT3_HUMAN	SLC25A6	ADP/ATP translocase 3
22.2027	22.6685	Q5VZK9;Q5VZK9-2	A0A0U1RQQ1;Q5VZK9-2;A0A8V8TRE2;Q5VZK9	CARL1_HUMAN	CARMIL1	F-actin-uncapping protein LRRC16A
22.2029	21.4709	Q5T200-2	Q5T200-2;A0A7I2V4I5;Q5T200	ZC3HD_HUMAN	ZC3H13	Isoform of Q5T200, Isoform 2 of Zinc finger CCCH domain-containing protein 13
22.2071	20.8703	Q8N5K1	D6RCF4;Q8N5K1	CISD2_HUMAN	CISD2	CDGSH iron-sulfur domain-containing protein 2
22.2075	21.5555	Q6ZVM7;Q6ZVM7-5	B7Z2U2;Q6ZVM7-2;Q6ZVM7-3;Q6ZVM7-4;Q6ZVM7-5;F5H3S6;Q6ZVM7	TM1L2_HUMAN	TOM1L2	TOM1-like protein 2
22.2213	21.4662	Q8IUI8;Q8IUI8-2	Q8IUI8-2;Q8IUI8	CRLF3_HUMAN	CRLF3	Cytokine receptor-like factor 3
22.2236	18.5603	Q96KC8	Q96KC8	DNJC1_HUMAN	DNAJC1	DnaJ homolog subfamily C member 1
22.237	18.6984	Q86UU0;Q86UU0-2;Q86UU0-3;Q86UU0-4	Q86UU0-2;Q86UU0-3;Q86UU0-4;A0A087WZX0;Q86UU0	BCL9L_HUMAN	BCL9L	B-cell CLL/lymphoma 9-like protein
22.2406	21.9419	Q8NC51-4	Q8NC51-3;Q8NC51-4	SERB1_HUMAN	SERBP1	Isoform of Q8NC51, Isoform 4 of SERPINE1 mRNA-binding protein 1
22.242	21.9665	Q7Z4G1;Q7Z4G1-2	B0QZ40;Q7Z4G1-2;Q7Z4G1	COMD6_HUMAN	COMMD6	COMM domain-containing protein 6
22.2425	21.2246	Q9HCE5	A0A0D9SFW0;Q9HCE5	MET14_HUMAN	METTL14	N6-adenosine-methyltransferase non-catalytic subunit
22.2425	21.5958	Q03252	Q03252	LMNB2_HUMAN	LMNB2	Lamin-B2
22.2452	NaN	O15409;O15409-4;O15409-5;O15409-6;O15409-7;O15409-8;O15409-9	A8MUV4;A0A0U1RQR8;A0A0U1RQM2;A0A0U1RQY3;A0A0U1RQE0;C9JQP8;O15409-4;O15409-5;O15409-6;O15409-7;O15409-8;O15409-9;Q8N6B5;A0A994J6W1;A0A994J3Y0;O15409	FOXP2_HUMAN	FOXP2	Forkhead box protein P2
22.2519	19.621	Q6XZF7	Q6XZF7	DNMBP_HUMAN	DNMBP	Dynamin-binding protein
22.2522	21.9914	Q5JTD0;Q5JTD0-2	A0A075B6G8;Q5JTD0-2;Q5JTD0-3;E2QRK7;Q5JTD0	TJAP1_HUMAN	TJAP1	Tight junction-associated protein 1
22.2567	21.7553	Q5SYC1	Q5SYC1	CLVS2_HUMAN	CLVS2	Clavesin-2
22.2578	NaN	O15090	K7EKT4;K7EQN6;A0A994J7Z0;A0A994J5C6;O15090	ZN536_HUMAN	ZNF536	Zinc finger protein 536
22.2663	NaN	Q9H1E5	Q9H1E5	TMX4_HUMAN	TMX4	Thioredoxin-related transmembrane protein 4
22.2673	19.0878	P52739;P52739-2	P52739-2;P52739	ZN131_HUMAN	ZNF131	Zinc finger protein 131
22.2682	NaN	Q9UBN7;Q9UBN7-2	A6NDI8;A0A2R8Y6Z9;A0A2R8Y758;A0A2R8Y559;Q9UBN7-2;A0A2R8YDE6;A0A8V8TM63;A0A8V8TL08;A0A8V8TKY7;A0A8V8TLA9;Q9UBN7	HDAC6_HUMAN	HDAC6	Histone deacetylase 6
22.2707	19.6103	O75164	O75164-2;O75164	KDM4A_HUMAN	KDM4A	Lysine-specific demethylase 4A
22.2728	15.1534	Q13572	Q13572-2;G3V588;G3V5A3;Q13572	ITPK1_HUMAN	ITPK1	Inositol-tetrakisphosphate 1-kinase
22.2735	20.8873	O00479	O00479	HMGN4_HUMAN	HMGN4	High mobility group nucleosome-binding domain-containing protein 4
22.2763	19.2493	Q9NYZ3	Q9NYZ3	GTSE1_HUMAN	GTSE1	G2 and S phase-expressed protein 1
22.2772	18.026	P39060;P39060-1;P39060-2	H7BXV5;P39060-1;P39060-2;P39060	COIA1_HUMAN	COL18A1	Collagen alpha-1(XVIII) chain
22.2799	20.0839	Q5TKA1;Q5TKA1-3	C9J5J4;H0Y322;H7C4T7;Q5TKA1-2;Q5TKA1-3;Q5TKA1	LIN9_HUMAN	LIN9	Protein lin-9 homolog
22.2833	18.99	Q9Y2X9;Q9Y2X9-2	Q9Y2X9-2;Q9Y2X9	ZN281_HUMAN	ZNF281	Zinc finger protein 281
22.2839	15.7471	Q93015-2	Q93015-2;Q93015	NAA80_HUMAN	NAA80	Isoform of Q93015, Isoform 2 of N-alpha-acetyltransferase 80
22.2845	21.2802	O43422	A0A804HL83;O43422	P52K_HUMAN	THAP12	52 kDa repressor of the inhibitor of the protein kinase
22.285	21.0292	Q9UGN5;Q9UGN5-2	G3V167;Q9UGN5-2;E9PJ27;Q9UGN5	PARP2_HUMAN	PARP2	Poly [ADP-ribose] polymerase 2
22.2857	20.4223	Q12974;Q12974-3;Q93096	A0A0D9SGK2;Q12974-3;Q12974-4;Q93096;Q12974	TP4A1_HUMAN;TP4A2_HUMAN	PTP4A1;PTP4A2	Protein tyrosine phosphatase type IVA 2
22.29	20.7415	P05423	E7EQ68;E5RHT4;P05423	RPC4_HUMAN	POLR3D	DNA-directed RNA polymerase III subunit RPC4
22.2975	21.546	Q70Z53	Q70Z53-2;Q70Z53-3;Q70Z53-4;Q70Z53-5;Q70Z53	F10C1_HUMAN	FRA10AC1	Protein FRA10AC1
22.2979	20.9633	Q9H4H8;Q9H4H8-2	Q9H4H8-2;A0A087WXK8;Q9H4H8	FA83D_HUMAN	FAM83D	Protein FAM83D
22.3005	21.1374	Q5JTC6;Q5JTC6-2	Q5JTC6-2;Q5JTC6	AMER1_HUMAN	AMER1	APC membrane recruitment protein 1
22.3049	17.0864	Q9Y4E5;Q9Y4E5-2	D6RIA1;Q9Y4E5-2;E9PH99;Q9Y4E5	ZN451_HUMAN	ZNF451	E3 SUMO-protein ligase ZNF451
22.3064	23.0206	Q96JB5	Q96JB5-2;Q96JB5-3;Q96JB5-4;J3QRM1;Q96JB5	CK5P3_HUMAN	CDK5RAP3	CDK5 regulatory subunit-associated protein 3
22.3137	20.6524	Q9H4G0;Q9H4G0-2;Q9H4G0-3	A0A1B0GTW6;X6RC15;Q9H4G0-4;Q9H4G0-2;Q9H4G0-3;H7C2K6;A0A0C4DH22;Q9H4G0	E41L1_HUMAN	EPB41L1	Band 4.1-like protein 1
22.3192	NaN	O14917	A0A087WXV2;O14917	PCD17_HUMAN	PCDH17	Protocadherin-17
22.3234	20.7527	O15228;O15228-2	O15228-2;O15228	GNPAT_HUMAN	GNPAT	Dihydroxyacetone phosphate acyltransferase
22.3295	17.8186	Q9Y4A5;Q9Y4A5-2	Q9Y4A5-2;H0Y4W2;A0A994J4S5;F2Z2U4;Q9Y4A5	TRRAP_HUMAN	TRRAP	Transformation/transcription domain-associated protein
22.3311	28.4977	H7BZ55	A0A8J8ZEH8;H7BZ55	CRCC2_HUMAN	CROCC2	Ciliary rootlet coiled-coil protein 2
22.332	20.0348	Q9P1Z2;Q9P1Z2-2;Q9P1Z2-3;Q9P1Z2-4	Q9P1Z2-2;Q9P1Z2-3;Q9P1Z2-4;Q9P1Z2	CACO1_HUMAN	CALCOCO1	Calcium-binding and coiled-coil domain-containing protein 1
22.3332	19.9492	Q8TE77	C9JUG3;Q8TE77-3;Q8TE77-4;Q8TE77	SSH3_HUMAN	SSH3	Protein phosphatase Slingshot homolog 3
22.3354	20.8256	O43715	O43715	TRIA1_HUMAN	TRIAP1	TP53-regulated inhibitor of apoptosis 1
22.3383	17.7162	Q86WA8	H3BQ67;Q86WA8-2;E7EN44;Q86WA8	LONP2_HUMAN	LONP2	Lon protease homolog 2, peroxisomal
22.3387	17.1616	Q96HP4	C9JLB7;U3KQU8;Q96HP4	OXND1_HUMAN	OXNAD1	Oxidoreductase NAD-binding domain-containing protein 1
22.3396	19.1351	Q05513;Q05513-2;Q05513-3	J3KRP7;E9PBE1;D6RG01;D6RGG1;D6RBD4;D6RAU1;D6RAN5;D6RDM0;D6RC84;Q05513-2;Q05513-3;F2Z2H9;Q05513	KPCZ_HUMAN	PRKCZ	Protein kinase C zeta type
22.3404	21.3865	O60293;O60293-2	G3V1X1;O60293-2;O60293-4;O60293	ZC3H1_HUMAN	ZFC3H1	Zinc finger C3H1 domain-containing protein
22.3443	19.7975	O96005	O96005-3;O96005-4;K7EQQ1;O96005	CLPT1_HUMAN	CLPTM1	Putative lipid scramblase CLPTM1
22.3451	20.6602	P15151;P15151-2;P15151-3;P15151-4	A0A0A0MSA9;P15151-4;P15151-2;P15151-3;A0A0C4DG49;P15151	PVR_HUMAN	PVR	Poliovirus receptor
22.3466	19.0562	P60006;P60006-2	F8WDQ6;P60006-2;G5EA39;F5GXB9;F5H6E4;F5H2T3;F5H3R3;P60006	APC15_HUMAN	ANAPC15	Anaphase-promoting complex subunit 15
22.3485	20.8051	Q6STE5	C9JYI7;Q6STE5-2;Q6STE5	SMRD3_HUMAN	SMARCD3	SWI/SNF-related matrix-associated actin-dependent regulator of chromatin subfamily D member 3
22.3502	NaN	Q99942	A0A140TA09;Q99942	RNF5_HUMAN	RNF5	E3 ubiquitin-protein ligase RNF5
22.3503	20.5969	Q96CW6	Q96CW6	S7A6O_HUMAN	SLC7A6OS	Probable RNA polymerase II nuclear localization protein SLC7A6OS
22.3621	21.3096	Q0JRZ9	Q0JRZ9-3;Q0JRZ9	FCHO2_HUMAN	FCHO2	F-BAR domain only protein 2
22.3628	21.0821	Q9H063	E9PSH4;E9PR76;Q9H063	MAF1_HUMAN	MAF1	Repressor of RNA polymerase III transcription MAF1 homolog
22.3633	20.7496	Q9GZS1;Q9GZS1-1	Q9GZS1-1;Q9GZS1	RPA49_HUMAN	POLR1E	DNA-directed RNA polymerase I subunit RPA49
22.3643	19.8562	P32019;P32019-2;P32019-3	E7ESY0;P32019-2;P32019-3;P32019-4;P32019	I5P2_HUMAN	INPP5B	Type II inositol 1,4,5-trisphosphate 5-phosphatase
22.3667	25.2375	Q9UN81	Q9UN81	LORF1_HUMAN	L1RE1	LINE-1 retrotransposable element ORF1 protein
22.3679	20.4673	Q9BSY9	Q9BSY9-2;Q9BSY9	DESI2_HUMAN	DESI2	Deubiquitinase DESI2
22.3703	22.579	O15078	J3KNF5;A0A6Q8PG44;A0A6Q8PGB1;A0A6Q8PGC3;A0A6Q8PGP6;A0A6Q8PH24;A0A6Q8PH78;A0A6Q8PEZ6;A0A5F9ZHU6;A0A5K1VW81;S4R322;O15078	CE290_HUMAN	CEP290	Centrosomal protein of 290 kDa
22.3767	20.5317	Q8IVH2;Q8IVH2-2;Q8IVH2-3	B7ZBM3;Q8IVH2-2;Q8IVH2-3;Q8IVH2	FOXP4_HUMAN	FOXP4	Forkhead box protein P4
22.3806	19.024	Q8NEN9	Q8NEN9	PDZD8_HUMAN	PDZD8	PDZ domain-containing protein 8
22.3857	NaN	Q9UJT0	S4R3K3;Q9UJT0	TBE_HUMAN	TUBE1	Tubulin epsilon chain
22.3892	17.8033	P49407;P49407-2	H0YET9;P49407-2;P49407	ARRB1_HUMAN	ARRB1	Beta-arrestin-1
22.3937	NaN	O14545	F8VNX8;O14545	TRAD1_HUMAN	TRAFD1	TRAF-type zinc finger domain-containing protein 1
22.3954	18.6044	O43181	H0Y9M8;O43181	NDUS4_HUMAN	NDUFS4	NADH dehydrogenase [ubiquinone] iron-sulfur protein 4, mitochondrial
22.396	20.5102	Q5VTE6;Q5VTE6-2	Q5VTE6-2;Q5VTE6	ANGE2_HUMAN	ANGEL2	Protein angel homolog 2
22.3962	NaN	Q9NZJ9	Q9NZJ9-2;A0A024RBG1;Q9NZJ9	NUDT4_HUMAN	NUDT4	Diphosphoinositol polyphosphate phosphohydrolase 2
22.4034	21.0472	E7EQJ0	E7EQJ0	E7EQJ0_HUMAN	HNRNPH1	Isoform of P31943, Heterogeneous nuclear ribonucleoprotein H1 (Fragment)
22.408	20.789	P23610	P23610	HAP40_HUMAN	F8A3	40-kDa huntingtin-associated protein
22.4127	20.1094	P35555	P35555	FBN1_HUMAN	FBN1	Fibrillin-1
22.4127	NaN	Q9UHW5;Q9UHW5-2	Q9UHW5-2;S4R3M7;Q9UHW5	GPN3_HUMAN	GPN3	GPN-loop GTPase 3
22.4139	20.9562	Q9Y6H1	Q9Y6H1;Q5T1J5	CHCH2_HUMAN	CHCHD2	Coiled-coil-helix-coiled-coil-helix domain-containing protein 2
22.4177	15.4435	Q53H80	Q53H80	AKIR2_HUMAN	AKIRIN2	Akirin-2
22.4201	21.1055	Q8TED1	E7ETY7;Q8TED1	GPX8_HUMAN	GPX8	Probable glutathione peroxidase 8
22.4207	18.9709	Q9Y4F3;Q9Y4F3-3;Q9Y4F3-4;Q9Y4F3-5	G8JLP4;F8VVB8;Q9Y4F3-3;Q9Y4F3-4;Q9Y4F3-5;Q9Y4F3	MARF1_HUMAN	MARF1	Meiosis regulator and mRNA stability factor 1
22.4239	20.849	O95295	O95295	SNAPN_HUMAN	SNAPIN	SNARE-associated protein Snapin
22.4275	20.25	O95070	A6NGW1;C9JST7;E9PIZ0;O95070	YIF1A_HUMAN	YIF1A	Protein YIF1A
22.4326	19.2275	Q9NXN4;Q9NXN4-2	Q9NXN4-2;Q9NXN4	GDAP2_HUMAN	GDAP2	Ganglioside-induced differentiation-associated protein 2
22.4329	18.4238	Q92506	Q92506	DHB8_HUMAN	HSD17B8	(3R)-3-hydroxyacyl-CoA dehydrogenase
22.4337	21.2873	P38432	P38432	COIL_HUMAN	COIL	Coilin
22.4365	19.8009	Q13823	Q13823	NOG2_HUMAN	GNL2	Nucleolar GTP-binding protein 2
22.4368	20.9956	Q13889;Q13889-2	Q13889-2;F5GXG6;F5GX35;F5H6X0;F5GWD3;F5H4K7;Q13889	TF2H3_HUMAN	GTF2H3	General transcription factor IIH subunit 3
22.4382	22.6015	O60271-5	O60271-2;O60271-4;O60271-5;O60271-9	JIP4_HUMAN	SPAG9	Isoform of O60271, Isoform 5 of C-Jun-amino-terminal kinase-interacting protein 4
22.4394	NaN	Q9H1Z4;Q9H1Z4-2	Q9H1Z4-2;A0A087X091;Q9H1Z4	WDR13_HUMAN	WDR13	WD repeat-containing protein 13
22.4412	21.6797	Q96PC5;Q96PC5-10;Q96PC5-11;Q96PC5-14;Q96PC5-5;Q96PC5-7;Q96PC5-8;Q96PC5-9	Q96PC5-5;Q96PC5-6;Q96PC5-7;Q96PC5-8;Q96PC5-9;G3V599;Q96PC5-10;Q96PC5-11;Q96PC5-12;Q96PC5-13;Q96PC5-14;Q96RT6;Q96PC5	MIA2_HUMAN	MIA2	Melanoma inhibitory activity protein 2
22.4418	21.9422	Q9NW68	F8W6C6;E9PNA9;Q9NW68-3;Q9NW68-5;Q9NW68-7;Q9NW68-8;Q9NW68-2;Q9NW68	BSDC1_HUMAN	BSDC1	BSD domain-containing protein 1
22.4429	22.2845	Q6IQ49;Q6IQ49-2	Q6IQ49-2;Q6IQ49-3;Q6IQ49	SDE2_HUMAN	SDE2	Splicing regulator SDE2
22.4429	17.5767	Q9ULV3;Q9ULV3-5	H0Y5D5;Q5SYW2;Q9ULV3-2;Q9ULV3-5;F5H2X7;Q9ULV3	CIZ1_HUMAN	CIZ1	Cip1-interacting zinc finger protein
22.4535	NaN	Q9NUS5	Q9NUS5	AP5S1_HUMAN	AP5S1	AP-5 complex subunit sigma-1
22.4596	22.3957	Q96QG7;Q96QG7-2	Q96QG7-2;Q96QG7	MTMR9_HUMAN	MTMR9	Myotubularin-related protein 9
22.4621	NaN	Q9UBG0	E7EME3;Q9UBG0	MRC2_HUMAN	MRC2	C-type mannose receptor 2
22.4652	23.7608	P36542	P36542-2;P36542	ATPG_HUMAN	ATP5F1C	ATP synthase subunit gamma, mitochondrial
22.4664	20.6223	Q9UBV2	Q9UBV2-2;G3V3B3;Q9UBV2	SE1L1_HUMAN	SEL1L	Protein sel-1 homolog 1
22.4665	21.6317	Q9H204	H0YAA8;Q9H204	MED28_HUMAN	MED28	Mediator of RNA polymerase II transcription subunit 28
22.4671	20.2106	O15056	E7ER60;O15056-2;O15056-3;A0A1W2PR85;O15056	SYNJ2_HUMAN	SYNJ2	Synaptojanin-2
22.4717	19.7371	O96008;O96008-2	K7EJ57;O96008-2;K7EKG4;O96008	TOM40_HUMAN	TOMM40	Mitochondrial import receptor subunit TOM40 homolog
22.4719	21.7914	Q9NVM9	Q9NVM9-2;Q9NVM9	INT13_HUMAN	INTS13	Integrator complex subunit 13
22.4725	19.5992	Q9ULF5	Q9ULF5	S39AA_HUMAN	SLC39A10	Zinc transporter ZIP10
22.4737	20.4093	Q8WYP5;Q8WYP5-2;Q8WYP5-3	Q8WYP5-2;Q8WYP5-3;Q8WYP5	ELYS_HUMAN	AHCTF1	Protein ELYS
22.474	24.1654	Q7Z6M4	E7EW93;C9JX74;B5MBW3;B4DKD5;H7C316;Q7Z6M4	MTEF4_HUMAN	MTERF4	Transcription termination factor 4, mitochondrial
22.4746	18.4974	Q86Y07;Q86Y07-2;Q86Y07-3;Q86Y07-5	E7ERS5;Q86Y07-2;Q86Y07-3;Q86Y07-5;Q86Y07	VRK2_HUMAN	VRK2	Serine/threonine-protein kinase VRK2
22.476	21.0234	Q7Z401;Q7Z401-2	A0A0U1RR27;A0A7I2RAZ6;Q7Z401-2;Q7Z401	MYCPP_HUMAN	DENND4A	C-myc promoter-binding protein
22.4766	19.4699	Q8NI35;Q8NI35-2;Q8NI35-3;Q8NI35-4	Q8NI35-2;Q8NI35-3;Q8NI35-4;A0A0U1RR46;A0A2R8Y549;Q8NI35	INADL_HUMAN	PATJ	InaD-like protein
22.4783	21.2798	Q92793;Q92793-2	Q92793-2;I3L466;Q92793	CBP_HUMAN	CREBBP	CREB-binding protein
22.4792	20.0708	P62070;P62070-4	P62070-2;P62070-3;P62070-4;E9PK85;P62070	RRAS2_HUMAN	RRAS2	Ras-related protein R-Ras2
22.4796	23.4821	Q8TDY2;Q8TDY2-2	Q8TDY2-2;Q8TDY2	RBCC1_HUMAN	RB1CC1	RB1-inducible coiled-coil protein 1
22.4798	21.7961	Q14202;Q14202-2	A6NHN7;A6NHB5;Q14202-2;Q14202	ZMYM3_HUMAN	ZMYM3	Zinc finger MYM-type protein 3
22.4827	17.941	Q9H8G2	A0A3B3ISJ3;Q9H8G2	CAAP1_HUMAN	CAAP1	Caspase activity and apoptosis inhibitor 1
22.4902	19.434	Q9Y587	Q9Y587-2;Q9Y587-3;Q9Y587-4;G3V5J6;G3V3X7;G3V4P7;A0A8C8KBR5;A0A8C8KCP6;A0A5F9ZH42;A0A5F9ZI62;A0A5F9ZHV3;Q9Y587	AP4S1_HUMAN	AP4S1	AP-4 complex subunit sigma-1
22.4921	21.4389	A0A087WTE6	A0A087WTE6	A0A087WTE6_HUMAN	SRCIN1	Isoform of Q9C0H9, SRC kinase signaling inhibitor 1 (Fragment)
22.4943	21.8414	Q96GC9	K7EPE7;Q96GC9-2;Q96GC9	VMP1_HUMAN	VMP1	Vacuole membrane protein 1
22.5011	19.6869	Q6ZSZ5;Q6ZSZ5-1;Q6ZSZ5-2;Q6ZSZ5-5;Q6ZSZ5-6	A0A804CAZ4;M0QZS0;Q6ZSZ5-5;Q6ZSZ5-6;Q6ZSZ5-1;Q6ZSZ5-2;A0A3B3IPE9;A0A087WZG4;A0A590UK10;Q6ZSZ5	ARHGI_HUMAN	ARHGEF18	Rho guanine nucleotide exchange factor 18
22.5036	NaN	Q9BZE9;Q9BZE9-2	J3KRY8;Q9BZE9-2;Q9BZE9-3;Q9BZE9-4;J3QR12;Q9BZE9	ASPC1_HUMAN	ASPSCR1	Tether containing UBX domain for GLUT4
22.5094	18.2484	Q6PIJ6;Q6PIJ6-2;Q6PIJ6-3	Q6PIJ6-2;Q6PIJ6-3;Q6PIJ6	FBX38_HUMAN	FBXO38	F-box only protein 38
22.5156	18.8406	Q53T59	B5MC96;F6TR53;Q53T59	H1BP3_HUMAN	HS1BP3	HCLS1-binding protein 3
22.5236	18.1431	Q9BXV9	Q9BXV9	GON7_HUMAN	GON7	EKC/KEOPS complex subunit GON7
22.5315	22.0701	Q5VW38-2	Q5VW38-2;Q5VW38-3;G5E994;Q5VW38	GP107_HUMAN	GPR107	Isoform of Q5VW38, Isoform 2 of Protein GPR107
22.5327	21.2611	A0A087X0S7;A0A0B4J2G4	A0A0B4J2G4;A0A087X0S7	A0A087X0S7_HUMAN;A0A0B4J2G4_HUMAN	LRRC41	Isoform of Q15345, Leucine rich repeat containing 41
22.5374	19.5621	Q9HCU5	H7C2N7;Q9HCU5	PREB_HUMAN	PREB	Prolactin regulatory element-binding protein
22.5425	19.7282	Q92759	Q92759	TF2H4_HUMAN	GTF2H4	General transcription factor IIH subunit 4
22.5441	22.3638	Q5T0N5;Q5T0N5-2;Q5T0N5-3;Q5T0N5-4;Q5T0N5-5	A0A075B6Q2;Q5T0N5-2;Q5T0N5-3;Q5T0N5-4;Q5T0N5-5;Q5T0N5	FBP1L_HUMAN	FNBP1L	Formin-binding protein 1-like
22.5526	18.3641	O00462	A0A2R8Y4U7;A0A2R8Y524;A0A2R8YEC9;A0A2R8YCE9;E9PFW2;O00462	MANBA_HUMAN	MANBA	Beta-mannosidase
22.5542	21.7482	Q9H9H4	F5H4M0;F5H1F6;Q9H9H4	VP37B_HUMAN	VPS37B	Vacuolar protein sorting-associated protein 37B
22.5581	19.3169	Q14674	Q14674-2;Q14674	ESPL1_HUMAN	ESPL1	Separin
22.5584	20.4876	O95999	A0A087WWW9;O95999	BCL10_HUMAN	BCL10	B-cell lymphoma/leukemia 10
22.5603	19.4183	Q86UY8;Q86UY8-2	Q86UY8-2;Q86UY8	NT5D3_HUMAN	NT5DC3	5'-nucleotidase domain-containing protein 3
22.5626	20.2767	P04899;P04899-4	P04899-2;P04899-5;P04899-6;P04899-3;P04899-4;P04899	GNAI2_HUMAN	GNAI2	Guanine nucleotide-binding protein G(i) subunit alpha-2
22.5636	21.3814	Q9UHB7	C9JCE0;Q9UHB7-2;Q9UHB7-3;Q9UHB7	AFF4_HUMAN	AFF4	AF4/FMR2 family member 4
22.5638	20.3081	Q14457	E7EV84;K7ELY9;Q14457	BECN1_HUMAN	BECN1	Beclin-1
22.5652	NaN	Q9H0E2	E9PNS3;F2Z2Y8;Q9H0E2	TOLIP_HUMAN	TOLLIP	Toll-interacting protein
22.5655	21.0306	Q14185	A0A096LNH6;Q14185	DOCK1_HUMAN	DOCK1	Dedicator of cytokinesis protein 1
22.5688	20.7979	P36957	Q86SW4;P36957-2;P36957	ODO2_HUMAN	DLST	Dihydrolipoyllysine-residue succinyltransferase component of 2-oxoglutarate dehydrogenase complex, mitochondrial
22.5707	20.5759	P61224;P61224-3;P61224-4	E7ESV4;B7ZB78;P61224-3;P61224-4;F5GZG1;F5GX62;F5H6R7;F5H823;F5H7Y6;F5H004;P61224;A6NIZ1	RAP1B_HUMAN	RAP1B	Ras-related protein Rap-1b
22.5733	20.8062	Q8NG31;Q8NG31-2	Q8NG31-2;Q8NG31-4;H0YCZ2;Q8NG31	KNL1_HUMAN	KNL1	Kinetochore scaffold 1
22.5752	17.1582	P32519;P32519-2	A0A0U1RRL5;P32519-2;P32519	ELF1_HUMAN	ELF1	ETS-related transcription factor Elf-1
22.5752	20.4491	A7E2V4;A7E2V4-2;A7E2V4-3;A7E2V4-4;A7E2V4-5	H7BZ52;S4R3H3;S4R410;S4R393;A7E2V4-2;A7E2V4-3;A7E2V4-4;A7E2V4-5;A7E2V4	ZSWM8_HUMAN	ZSWIM8	Zinc finger SWIM domain-containing protein 8
22.5754	20.6099	Q9BT25	Q9BT25-2;Q9BT25-3;Q9BT25	HAUS8_HUMAN	HAUS8	HAUS augmin-like complex subunit 8
22.576	NaN	Q9UKL6;Q9UKL6-2	Q9UKL6-2;I3L4Z8;I3L3H0;I3L2M9;Q9UKL6	PPCT_HUMAN	PCTP	Phosphatidylcholine transfer protein
22.5767	19.6853	Q05932;Q05932-2;Q05932-3;Q05932-4	Q05932-2;Q05932-3;Q05932-4;Q5JU20;Q5JU21;Q5JU23;Q05932	FOLC_HUMAN	FPGS	Folylpolyglutamate synthase, mitochondrial
22.5774	NaN	Q9H0F6;Q9H0F6-2	Q9H0F6-2;Q9H0F6	SHRPN_HUMAN	SHARPIN	Sharpin
22.5792	21.5795	Q15637-5	Q15637-5;A0A7P0T9U7	SF01_HUMAN	SF1	Isoform of Q15637, Isoform 5 of Splicing factor 1
22.5812	20.7209	Q8N4Q0	J3KTQ8;Q8N4Q0-2;Q8N4Q0	PTGR3_HUMAN	PTGR3	Prostaglandin reductase 3
22.5842	19.0364	O95905;O95905-2;O95905-3	O95905-2;O95905-3;O95905	ECD_HUMAN	ECD	Protein ecdysoneless homolog
22.5846	18.34	Q8IVT5	A8MY87;Q8IVT5-2;Q8IVT5-3;Q8IVT5-4;A0A2R8Y5H9;A0A2R8Y4X0;A0A0A0MQW1;J3QLI1;Q8IVT5	KSR1_HUMAN	KSR1	Kinase suppressor of Ras 1
22.5849	17.4317	Q9H0S4;Q9H0S4-2	Q9H0S4-2;Q9H0S4	DDX47_HUMAN	DDX47	Probable ATP-dependent RNA helicase DDX47
22.5867	20.4371	Q8NBQ5	D6RCD0;Q8NBQ5	DHB11_HUMAN	HSD17B11	Estradiol 17-beta-dehydrogenase 11
22.5879	19.9849	Q8IZD4	Q8IZD4-2;F5GZK9;Q8IZD4	DCP1B_HUMAN	DCP1B	mRNA-decapping enzyme 1B
22.5936	25.4717	Q96F45;Q96F45-2	Q96F45-2;Q96F45	ZN503_HUMAN	ZNF503	Zinc finger protein 503
22.5952	22.4238	Q96JB2	Q96JB2-2;Q96JB2	COG3_HUMAN	COG3	Conserved oligomeric Golgi complex subunit 3
22.5987	20.5327	Q70IA6;Q70IA6-2;Q70IA6-3	Q70IA6-2;Q70IA6-3;Q70IA6	MOB2_HUMAN	MOB2	MOB kinase activator 2
22.6012	17.0652	Q9NPE2	Q9NPE2	NGRN_HUMAN	NGRN	Neugrin
22.6027	22.4666	Q12982;Q12982-2	Q12982-2;H7C096;Q12982	BNIP2_HUMAN	BNIP2	BCL2/adenovirus E1B 19 kDa protein-interacting protein 2
22.6045	NaN	Q99805	Q99805	TM9S2_HUMAN	TM9SF2	Transmembrane 9 superfamily member 2
22.6047	22.0659	Q9H501	Q9H501	ESF1_HUMAN	ESF1	ESF1 homolog
22.6047	19.487	Q5JTV8;Q5JTV8-3	J3KN66;H0Y4R4;Q5JTV8-3;Q5JTV8-4;Q5JTV8	TOIP1_HUMAN	TOR1AIP1	Torsin-1A-interacting protein 1
22.61	NaN	Q9H8M2;Q9H8M2-1;Q9H8M2-3;Q9H8M2-6	Q9H8M2-1;Q9H8M2-3;Q9H8M2-6;Q9H8M2	BRD9_HUMAN	BRD9	Bromodomain-containing protein 9
22.6101	17.5352	Q63HR2;Q63HR2-2;Q63HR2-4;Q63HR2-6	F8VV64;Q63HR2-2;Q63HR2-4;Q63HR2-5;Q63HR2-6;Q63HR2	TENS2_HUMAN	TNS2	Tensin-2
22.6112	21.1834	Q16718;Q16718-2	C9IZN5;Q16718-2;F8WAS3;H7BYD0;A0A087X1G1;A0A7I2V2W4;A0A7I2V3L8;Q16718	NDUA5_HUMAN	NDUFA5	NADH dehydrogenase [ubiquinone] 1 alpha subcomplex subunit 5
22.6169	NaN	O00522;O00522-2;O00522-3	O00522-2;O00522-3;A0A8I5KUF9;A0A8I5KW41;A0A3B3ITR4;A0A8I5KWQ7;C9JD81;O00522	KRIT1_HUMAN	KRIT1	Krev interaction trapped protein 1
22.617	20.7849	Q6ZU35	A0A2R8Y6P1;F5H1N7;Q6ZU35	CRACD_HUMAN	CRACD	Capping protein-inhibiting regulator of actin dynamics
22.6181	NaN	Q9P2K3-3	Q9P2K3-3;Q9P2K3	RCOR3_HUMAN	RCOR3	Isoform of Q9P2K3, Isoform 3 of REST corepressor 3
22.6223	21.4824	P19474	P19474	RO52_HUMAN	TRIM21	E3 ubiquitin-protein ligase TRIM21
22.6239	NaN	Q9BS16	D6RJF0;D6RHD3;Q9BS16	CENPK_HUMAN	CENPK	Centromere protein K
22.6258	19.7805	Q96BX8	Q96BX8	MOB3A_HUMAN	MOB3A	MOB kinase activator 3A
22.6301	NaN	Q9Y3E2	Q9Y3E2	BOLA1_HUMAN	BOLA1	BolA-like protein 1
22.6308	21.726	Q9BXB4	Q9BXB4	OSB11_HUMAN	OSBPL11	Oxysterol-binding protein-related protein 11
22.6309	NaN	O43716	F8VRU3;H0YIV9;O43716	GATC_HUMAN	GATC	Glutamyl-tRNA(Gln) amidotransferase subunit C, mitochondrial
22.6354	18.9766	Q15751	Q15751	HERC1_HUMAN	HERC1	Probable E3 ubiquitin-protein ligase HERC1
22.6376	19.0193	Q8TF74	A8MWR2;Q8TF74-2;Q8TF74	WIPF2_HUMAN	WIPF2	WAS/WASL-interacting protein family member 2
22.6383	22.6828	Q9H3Z4;Q9H3Z4-2	Q9H3Z4-2;Q9H3Z4	DNJC5_HUMAN	DNAJC5	DnaJ homolog subfamily C member 5
22.6394	20.2767	H0YHE0	H0YHE0	H0YHE0_HUMAN	HEATR5A	Isoform of Q86XA9, HEAT repeat containing 5A (Fragment)
22.6405	23.1412	Q9UBU8;Q9UBU8-2	H0YMJ0;H0YNE0;H0YLJ3;B3KTM8;Q9UBU8-2;Q9UBU8	MO4L1_HUMAN	MORF4L1	Mortality factor 4-like protein 1
22.6415	19.3457	Q9H6U6;Q9H6U6-2;Q9H6U6-3;Q9H6U6-7;Q9H6U6-8	K7EJH7;K7EKB0;K7EML5;Q9H6U6-2;Q9H6U6-3;Q9H6U6-6;Q9H6U6-7;Q9H6U6-8;K7ESE9;Q9H6U6	BCAS3_HUMAN	BCAS3	BCAS3 microtubule associated cell migration factor
22.6417	20.9231	Q9H1H9-3	E7ERX9;A0A1B0GUA8;Q9H1H9-2;Q9H1H9-3;Q9H1H9-4;Q9NQT8;Q9H1H9	KI13A_HUMAN	KIF13A	Isoform of Q9H1H9, Isoform 3 of Kinesin-like protein KIF13A
22.6455	21.7748	Q9NQT8	E7ERX9;Q9NQT8	KI13B_HUMAN	KIF13B	Kinesin-like protein KIF13B
22.648	18.858	Q9UP95;Q9UP95-2;Q9UP95-5;Q9UP95-6;Q9UP95-7	Q9UP95-2;Q9UP95-3;Q9UP95-4;Q9UP95-5;Q9UP95-6;Q9UP95-7;Q9UP95	S12A4_HUMAN	SLC12A4	Solute carrier family 12 member 4
22.648	22.1072	Q9ULK5	A0A8Q3SIN7;Q9ULK5	VANG2_HUMAN	VANGL2	Vang-like protein 2
22.6482	21.4717	P63218	A0A804HLA8;P63218	GBG5_HUMAN	GNG5	Guanine nucleotide-binding protein G(I)/G(S)/G(O) subunit gamma-5
22.6488	NaN	Q9BWU1;Q9BWU1-2	F6QTA4;Q9BWU1-2;Q9BWU1	CDK19_HUMAN	CDK19	Cyclin-dependent kinase 19
22.6528	18.6875	Q96FN4	Q96FN4	CPNE2_HUMAN	CPNE2	Copine-2
22.6552	22.4236	Q15170	Q15170	TCAL1_HUMAN	TCEAL1	Transcription elongation factor A protein-like 1
22.6573	20.8034	Q05086;Q05086-2;Q05086-3	A0A6Q8PHE5;A0A1B0GVL3;A0A0D9SG77;Q05086-2;Q05086-3;Q05086	UBE3A_HUMAN	UBE3A	Ubiquitin-protein ligase E3A
22.6579	NaN	Q9HBF4;Q9HBF4-3	G3V5N8;Q9HBF4-3;Q9HBF4	ZFYV1_HUMAN	ZFYVE1	Zinc finger FYVE domain-containing protein 1
22.6595	20.0879	P22695	H3BRG4;P22695	QCR2_HUMAN	UQCRC2	Cytochrome b-c1 complex subunit 2, mitochondrial
22.6632	NaN	Q9BRQ0	Q5T171;Q9BRQ0	PYGO2_HUMAN	PYGO2	Pygopus homolog 2
22.6642	20.9611	O43929	O43929-2;O43929-3;O43929	ORC4_HUMAN	ORC4	Origin recognition complex subunit 4
22.6707	16.9882	Q9BWS9;Q9BWS9-2;Q9BWS9-3	Q9BWS9-2;Q9BWS9-3;Q9BWS9	CHID1_HUMAN	CHID1	Chitinase domain-containing protein 1
22.6766	NaN	Q9UKM7	H0YI64;A0A804HJ66;A0A804HL61;Q9UKM7	MA1B1_HUMAN	MAN1B1	Endoplasmic reticulum mannosyl-oligosaccharide 1,2-alpha-mannosidase
22.6785	21.921	P21580	P21580	TNAP3_HUMAN	TNFAIP3	Tumor necrosis factor alpha-induced protein 3
22.6786	NaN	Q9BVN2-2	Q9BVN2-2;Q9BVN2-3;Q9BVN2-4;Q68CX2;A0A8Q3SIT1;A0A087WX95;A0A087WYB2;Q9BVN2	RUSC1_HUMAN	RUSC1	Isoform of Q9BVN2, Isoform 2 of AP-4 complex accessory subunit RUSC1
22.6787	21.5776	O95359;O95359-3	E9PBC6;O95359-3;E7EMZ9;O95359	TACC2_HUMAN	TACC2	Transforming acidic coiled-coil-containing protein 2
22.6809	18.9526	Q9BSV6	B0V3J0;E7EQB3;A0A590UJW4;A0A0G2JNL0;A0A0G2JNK5;A0A590UJ73;Q9BSV6	SEN34_HUMAN	TSEN34	tRNA-splicing endonuclease subunit Sen34
22.6835	17.5455	Q96JI7;Q96JI7-3	H0YLR8;H0YLK7;Q96JI7-3;A0A804HID9;A0A804HLC5;A0A804HK59;Q96JI7	SPTCS_HUMAN	SPG11	Spatacsin
22.6842	21.511	Q9H410	Q5JW53;Q9H410	DSN1_HUMAN	DSN1	Kinetochore-associated protein DSN1 homolog
22.6852	21.3596	Q15149-4	Q15149-4	PLEC_HUMAN	PLEC	Isoform of Q15149, Isoform 4 of Plectin
22.6869	20.5163	Q14112;Q14112-2	Q14112-2;Q14112	NID2_HUMAN	NID2	Nidogen-2
22.6884	22.3684	O60437	K7EKI8;K7EQ71;O60437	PEPL_HUMAN	PPL	Periplakin
22.6997	20.5747	Q96S38;Q96S38-2	F6RJM5;Q96S38-2;A0A087X1U5;F5H7T0;Q96S38	KS6C1_HUMAN	RPS6KC1	Ribosomal protein S6 kinase delta-1
22.7013	19.4888	Q9H8W4	Q9H8W4	PKHF2_HUMAN	PLEKHF2	Pleckstrin homology domain-containing family F member 2
22.7019	18.4136	A5PLN9;A5PLN9-2;A5PLN9-4;A5PLN9-5;A5PLN9-7	D6RB83;A5PLN9-2;A5PLN9-4;A5PLN9-5;A5PLN9-7;A5PLN9	TPC13_HUMAN	TRAPPC13	Trafficking protein particle complex subunit 13
22.7035	19.4905	Q15036;Q15036-2	Q15036-2;Q15036	SNX17_HUMAN	SNX17	Sorting nexin-17
22.7076	NaN	Q9UPQ3-3	A0A0U1RRF1;E7EUN2;H7C211;H7C0A7;Q9UPQ3-2;Q9UPQ3-3;X5D293;Q9UPQ3	AGAP1_HUMAN	AGAP1	Isoform of Q9UPQ3, Isoform 3 of Arf-GAP with GTPase, ANK repeat and PH domain-containing protein 1
22.7099	22.6721	O14733;O14733-2;O14733-3;O14733-4	O14733-2;O14733-3;O14733-4;O14733	MP2K7_HUMAN	MAP2K7	Dual specificity mitogen-activated protein kinase kinase 7
22.7118	NaN	Q9NPA3	Q9NPA3	M1IP1_HUMAN	MID1IP1	Mid1-interacting protein 1
22.7151	NaN	O00746;O00746-2	Q4TT34;O00746-2;A0A087WVT9;F2Z2X0;O00746	NDKM_HUMAN	NME4	Nucleoside diphosphate kinase, mitochondrial
22.7168	20.4077	Q13107;Q13107-2	Q13107-2;Q13107-3;C9JNU9;Q13107	UBP4_HUMAN	USP4	Ubiquitin carboxyl-terminal hydrolase 4
22.7204	NaN	Q9BSH5	Q9BSH5	HDHD3_HUMAN	HDHD3	Haloacid dehalogenase-like hydrolase domain-containing protein 3
22.722	NaN	A6NHL2;A6NHL2-2	A6NHL2-2;A6NHL2	TBAL3_HUMAN	TUBAL3	Tubulin alpha chain-like 3
22.7263	21.7788	Q7Z2T5	Q7Z2T5	TRM1L_HUMAN	TRMT1L	TRMT1-like protein
22.7285	18.017	A0A8V8TMN4;H0Y9S9;K7ENU7	H0Y9S9;A0A8V8TMN4;K7ENU7	A0A8V8TMN4_HUMAN;H0Y9S9_HUMAN;K7ENU7_HUMAN	PPIP5K2	Isoform of O43314, Inositol hexakisphosphate and diphosphoinositol-pentakisphosphate kinase
22.7345	18.3582	Q7Z7G8;Q7Z7G8-2;Q7Z7G8-3;Q7Z7G8-6	Q7Z7G8-2;Q7Z7G8-3;Q7Z7G8-4;Q7Z7G8-6;A0A8C8KE22;A0A804HJ62;A0A804HL73;A0A804HKG9;Q7Z7G8	VP13B_HUMAN	VPS13B	Intermembrane lipid transfer protein VPS13B
22.7359	17.9786	P16219	E9PE82;P16219	ACADS_HUMAN	ACADS	Short-chain specific acyl-CoA dehydrogenase, mitochondrial
22.7453	21.7447	O94826	O94826	TOM70_HUMAN	TOMM70	Mitochondrial import receptor subunit TOM70
22.7484	20.5292	Q9BVS4;Q9BVS4-2	Q9BVS4-2;Q9BVS4	RIOK2_HUMAN	RIOK2	Serine/threonine-protein kinase RIO2
22.7494	18.8032	O95391	E5RK41;E5RGM7;A0A0C4DGD2;O95391	SLU7_HUMAN	SLU7	Pre-mRNA-splicing factor SLU7
22.7524	21.7121	A6NLN1;K7ES59	A6NLN1;K7ES59	A6NLN1_HUMAN;K7ES59_HUMAN	PTBP1	Isoform of P26599, Polypyrimidine tract-binding protein 1
22.7528	20.5057	Q9UKI8;Q9UKI8-4;Q9UKI8-5	Q9UKI8-2;Q9UKI8-3;Q9UKI8-4;Q9UKI8-5;B3KRP1;Q9UKI8	TLK1_HUMAN	TLK1	Serine/threonine-protein kinase tousled-like 1
22.7529	NaN	Q9Y6V7	M0R0K1;M0R1S3;M0QZC0;Q9Y6V7	DDX49_HUMAN	DDX49	Probable ATP-dependent RNA helicase DDX49
22.7543	22.2553	Q6AI08	K7EIX2;Q6AI08	HEAT6_HUMAN	HEATR6	HEAT repeat-containing protein 6
22.7549	NaN	Q9H5X1;Q9H5X1-2	H0YKV4;Q9H5X1-2;Q9H5X1	CIA2A_HUMAN	CIAO2A	Cytosolic iron-sulfur assembly component 2A
22.7555	22.0812	Q9HC07	Q9HC07	TM165_HUMAN	TMEM165	Transmembrane protein 165
22.7596	20.3587	Q8NBA8	D6REE2;D6RBD8;Q8NBA8	DTWD2_HUMAN	DTWD2	tRNA-uridine aminocarboxypropyltransferase 2
22.7598	NaN	A0A499FIZ0;A0A7I2V3I7;A0A7I2YQQ9	A0A499FIZ0;A0A7I2YQQ9;A0A7I2V3I7	A0A499FIZ0_HUMAN;A0A7I2V3I7_HUMAN;A0A7I2YQQ9_HUMAN	WDR26	Isoform of Q9H7D7, WD repeat domain 26
22.761	20.0946	Q69YN4;Q69YN4-3	Q69YN4-2;Q69YN4-3;Q69YN4-4;Q69YN4	VIR_HUMAN	VIRMA	Protein virilizer homolog
22.7624	20.2022	O15173	O15173-2;O15173	PGRC2_HUMAN	PGRMC2	Membrane-associated progesterone receptor component 2
22.764	22.729	Q15025;Q15025-3;Q15025-4	E7EW15;Q15025-2;Q15025-3;Q15025-4;Q15025-5;Q15025-6;Q15025-7;Q15025-8;A0A0A0MRZ4;E7EMV7;Q15025	TNIP1_HUMAN	TNIP1	TNFAIP3-interacting protein 1
22.7662	23.1078	O60573-2	O60573-2;B4E1E4;B9A044;B9A023;B8ZZL3;B8ZZ50;A0A8I5KSA5;A0A8I5KT16;O60573	IF4E2_HUMAN	EIF4E2	Isoform of O60573, Isoform 2 of Eukaryotic translation initiation factor 4E type 2
22.7663	20.4383	O60870;O60870-2	O60870-2;O60870	KIN17_HUMAN	KIN	DNA/RNA-binding protein KIN17
22.7688	22.0906	Q8NHW5	Q8NHW5	RLA0L_HUMAN	RPLP0P6	Putative ribosomal protein uL10-like
22.771	14.3544	Q13490;Q13490-2	Q13490-2;E9PMH5;E9PIW1;Q13490	BIRC2_HUMAN	BIRC2	Baculoviral IAP repeat-containing protein 2
22.7713	19.9433	Q9BRQ8	Q9BRQ8	FSP1_HUMAN	AIFM2	Ferroptosis suppressor protein 1
22.7758	18.5565	Q9H9S4	Q5TAW7;B7ZBJ4;Q9H9S4	CB39L_HUMAN	CAB39L	Calcium-binding protein 39-like
22.776	17.1294	Q8TF46;Q8TF46-2;Q8TF46-4	Q8TF46-4;Q8TF46-2;Q8TF46	DI3L1_HUMAN	DIS3L	DIS3-like exonuclease 1
22.7777	NaN	Q9Y365	F5GY07;F5GY11;F5H8G1;F5GWK5;F5H8H3;F5H5A8;F5H3G8;F5H0V7;F5H1Z6;Q9Y365	STA10_HUMAN	STARD10	START domain-containing protein 10
22.7803	21.5079	Q99623	J3KPX7;Q99623-2;F5GY37;F5GWA7;F5H3X6;A0A7I2V5F0;Q99623	PHB2_HUMAN	PHB2	Prohibitin-2
22.7806	21.9406	Q9NQZ2	Q9NQZ2	SAS10_HUMAN	UTP3	Something about silencing protein 10
22.7812	21.532	P24386	P24386	RAE1_HUMAN	CHM	Rab proteins geranylgeranyltransferase component A 1
22.7828	18.1987	O14795;O14795-2	I6L9J0;A0A1B0GUS7;A0A1B0GVW8;O14795-2;B1AM27;O14795	UN13B_HUMAN	UNC13B	Protein unc-13 homolog B
22.7832	21.9755	Q12986	Q12986	NFX1_HUMAN	NFX1	Transcriptional repressor NF-X1
22.7841	19.1635	Q96NW4	K7ELM1;Q96NW4	ANR27_HUMAN	ANKRD27	Ankyrin repeat domain-containing protein 27
22.7852	20.9977	Q9NXW2;Q9NXW2-2	J3KPS0;Q9NXW2-2;V9GYN7;Q9NXW2	DJB12_HUMAN	DNAJB12	DnaJ homolog subfamily B member 12
22.788	20.9088	Q5XPI4	C9J266;C9JS59;Q5XPI4-2;Q5XPI4	RN123_HUMAN	RNF123	E3 ubiquitin-protein ligase RNF123
22.7881	19.7893	Q9BVC3	Q9BVC3	DCC1_HUMAN	DSCC1	Sister chromatid cohesion protein DCC1
22.7881	NaN	Q9HCE7;Q9HCE7-2	Q9HCE7-2;Q9HCE7	SMUF1_HUMAN	SMURF1	E3 ubiquitin-protein ligase SMURF1
22.7896	20.027	Q9UKA4	Q9UKA4	AKA11_HUMAN	AKAP11	A-kinase anchor protein 11
22.7916	22.8127	Q13206	A0A8I5KSH6;Q13206	DDX10_HUMAN	DDX10	Probable ATP-dependent RNA helicase DDX10
22.7919	19.731	P33316	H0YKI0;P33316	DUT_HUMAN	DUT	Deoxyuridine 5'-triphosphate nucleotidohydrolase, mitochondrial
22.7947	NaN	Q9NP66	H0YNS8;H0YMS9;H0YKM5;H0YK55;Q9NP66	HM20A_HUMAN	HMG20A	High mobility group protein 20A
22.7995	21.5472	P54278	C9J167;A0A2R8Y6S3;A0A8V8TQG9;A0A8V8TQI1;A0A8V8TQS5;A0A8V8TP84;A0A8V8TP89;A0A8V8TPE1;A0A8V8TQ50;A0A8V8TQ92;A0A8V8TNX6;A0A8V8TNY8;A0A8V8TP61;P54278	PMS2_HUMAN	PMS2	Mismatch repair endonuclease PMS2
22.8011	21.0419	Q9NRL2	Q9NRL2-2;Q9NRL2	BAZ1A_HUMAN	BAZ1A	Bromodomain adjacent to zinc finger domain protein 1A
22.8031	NaN	Q9H840	Q9H840	GEMI7_HUMAN	GEMIN7	Gem-associated protein 7
22.8032	19.0888	Q8WVK7	J3KTC5;Q8WVK7	SKA2_HUMAN	SKA2	Spindle and kinetochore-associated protein 2
22.8047	18.7319	P14927	P14927	QCR7_HUMAN	UQCRB	Cytochrome b-c1 complex subunit 7
22.8058	NaN	Q9Y3S1;Q9Y3S1-2;Q9Y3S1-4	Q9Y3S1-2;Q9Y3S1-3;Q9Y3S1-4;H0Y7T5;E9PCD1;A6PVV2;Q9Y3S1	WNK2_HUMAN	WNK2	Serine/threonine-protein kinase WNK2
22.8081	19.6324	P35226	J3KT13;Q5T8Z4;Q5T8Z6;A0A087X259;R4GMX3;P35227;P35226	BMI1_HUMAN	BMI1	Polycomb complex protein BMI-1
22.8091	20.5181	Q9NX70;Q9NX70-2	Q9NX70-2;B4DUA7;M0R3F3;Q9NX70	MED29_HUMAN	MED29	Mediator of RNA polymerase II transcription subunit 29
22.81	21.8788	P14621	F8WA34;E9PF46;P14621	ACYP2_HUMAN	ACYP2	Acylphosphatase-2
22.8112	20.7656	Q14139;Q14139-2	B7Z7P0;Q14139-2;Q14139	UBE4A_HUMAN	UBE4A	Ubiquitin conjugation factor E4 A
22.8119	20.5802	Q99081;Q99081-2;Q99081-3;Q99081-4	B4DZP2;B4DGI9;Q99081-2;Q99081-3;Q99081-4;F5GY10;Q99081	HTF4_HUMAN	TCF12	Transcription factor 12
22.8147	21.9168	P42025	P42025	ACTY_HUMAN	ACTR1B	Beta-centractin
22.816	21.5926	A0A087WWU8	A0A087WWU8	A0A087WWU8_HUMAN	TPM3	Isoform of P06753, Tropomyosin 3
22.8169	31.0438	Q14103-2;Q14103-4	D6RBQ9;Q14103-2;Q14103-4	HNRPD_HUMAN	HNRNPD	Isoform of Q14103, Isoform 2 of Heterogeneous nuclear ribonucleoprotein D0
22.8192	21.942	Q6DN12;Q6DN12-2	Q6DN12-2;Q6DN12-3;Q6DN12-4;Q6DN12	MCTP2_HUMAN	MCTP2	Multiple C2 and transmembrane domain-containing protein 2
22.8199	NaN	Q9Y303;Q9Y303-2;Q9Y303-3	H3BTZ6;H3BSV9;Q9Y303-2;Q9Y303-3;A0A3B3IU33;H3BQ15;Q9Y303	NAGA_HUMAN	AMDHD2	N-acetylglucosamine-6-phosphate deacetylase
22.82	20.9828	Q96I15	C9JNL5;A0A0A0MQU4;H7C3V9;H7C277;Q96I15-2;Q96I15	SCLY_HUMAN	SCLY	Selenocysteine lyase
22.8266	20.2489	Q08AE8;Q08AE8-2	Q08AE8-2;Q08AE8	SPIR1_HUMAN	SPIRE1	Protein spire homolog 1
22.828	22.433	Q6GMV2	Q6GMV2	SMYD5_HUMAN	SMYD5	Histone-lysine N-trimethyltransferase SMYD5
22.8326	22.5187	Q96JP5;Q96JP5-2	Q96JP5-2;A0A0A6YYC7;Q96JP5	ZFP91_HUMAN	ZFP91	E3 ubiquitin-protein ligase ZFP91
22.8346	22.9898	P53396-3	P53396-2;P53396-3	ACLY_HUMAN	ACLY	Isoform of P53396, Isoform 3 of ATP-citrate synthase
22.8365	20.8652	Q13242	H0YIB4;S4R3G0;Q13242	SRSF9_HUMAN	SRSF9	Serine/arginine-rich splicing factor 9
22.8371	17.3695	Q8N556;Q8N556-2	Q8N556-2;Q8N556	AFAP1_HUMAN	AFAP1	Actin filament-associated protein 1
22.8412	17.6562	Q5SYE7;Q5SYE7-2	Q5SYE7-2;Q5SYE7	NHSL1_HUMAN	NHSL1	NHS-like protein 1
22.8413	20.8269	Q8WUF8;Q8WUF8-3	Q8WUF8-2;Q8WUF8-3;E9PBM2;Q8WUF8	F172A_HUMAN	FAM172A	Cotranscriptional regulator FAM172A
22.8421	19.5001	Q9BYD6	H0Y8N7;Q9BYD6	RM01_HUMAN	MRPL1	Large ribosomal subunit protein uL1m
22.8428	20.9968	O95229;O95229-2	O95229-2;O95229	ZWINT_HUMAN	ZWINT	ZW10 interactor
22.8451	18.5714	Q86T24	Q86T24	KAISO_HUMAN	ZBTB33	Transcriptional regulator Kaiso
22.8484	24.0897	P53985	P53985	MOT1_HUMAN	SLC16A1	Monocarboxylate transporter 1
22.8525	19.4651	Q01167	Q01167	FOXK2_HUMAN	FOXK2	Forkhead box protein K2
22.8538	18.0967	Q9Y2I8;Q9Y2I8-2;Q9Y2I8-3	Q9Y2I8-2;Q9Y2I8-3;E7EQ49;C9JGR9;A0A3B3IT47;A0A994J4W1;A0A994J593;A0A994J4T0;A0A994J4U2;Q9Y2I8	WDR37_HUMAN	WDR37	WD repeat-containing protein 37
22.8557	20.5055	Q8IY18	Q8IY18	SMC5_HUMAN	SMC5	Structural maintenance of chromosomes protein 5
22.8558	21.0159	P00387;P00387-2;P00387-3	P00387-2;P00387-3;A0A8I5QKT9;A0A8J8Z3C6;A0A8J8YWN6;A0A8I5KPU0;A0A8I5KR71;A0A087WZB1;P00387	NB5R3_HUMAN	CYB5R3	NADH-cytochrome b5 reductase 3
22.8586	18.9956	Q9NWA0	Q9NWA0	MED9_HUMAN	MED9	Mediator of RNA polymerase II transcription subunit 9
22.8647	20.3646	O94964;O94964-2	O94964-2;O94964-4;X6R3R3;O94964	SOGA1_HUMAN	SOGA1	Protein SOGA1
22.8657	21.486	A0A140T962;A0A140T9B3;A0A140T9J9;A0A140T9M0;A0A140T9U0;A0A140T9W2;A0A1W2PNZ7;A0A1W2PR11;A0A1W2PRX1;Q53YP1;Q5QT33	O78179;A0A1W2PP77;A0A1W2PNZ7;A0A1W2PR11;A0A1W2PRX1;A0A1W2PRZ0;A0A140T9U0;A0A140T9T1;A0A140T9W2;A0A140T9M0;A0A140T9M5;A0A140T9J9;A0A140T9B3;A0A140T930;A0A140T937;A0A140T942;A0A140T962;A0A140T912;Q53YP1;Q5QT33	A0A140T962_HUMAN;A0A140T9B3_HUMAN;A0A140T9J9_HUMAN;A0A140T9M0_HUMAN;A0A140T9U0_HUMAN;A0A140T9W2_HUMAN;A0A1W2PNZ7_HUMAN;A0A1W2PR11_HUMAN;A0A1W2PRX1_HUMAN;Q53YP1_HUMAN;Q5QT33_HUMAN	HLA-C	Isoform of P10321, HLA class I histocompatibility antigen, C alpha chain
22.8668	19.805	Q99962	Q99962	SH3G2_HUMAN	SH3GL2	Endophilin-A1
22.8699	20.9633	Q969F9;Q969F9-2	G5E9V4;Q969F9-2;Q969F9	HPS3_HUMAN	HPS3	BLOC-2 complex member HPS3
22.873	20.0914	O75113	O75113	N4BP1_HUMAN	N4BP1	NEDD4-binding protein 1
22.8752	16.7344	Q92636;Q92636-2	Q92636-2;Q92636	FAN_HUMAN	NSMAF	Protein FAN
22.8759	20.4501	Q02880;Q02880-2	A0A8V8TPE3;A0A8V8TP20;A0A8V8TN33;E9PCY5;Q02880-2;Q02880	TOP2B_HUMAN	TOP2B	DNA topoisomerase 2-beta
22.8764	20.1522	Q9NXR5	S4R3R2;Q9NXR5	ANR10_HUMAN	ANKRD10	Ankyrin repeat domain-containing protein 10
22.8787	21.4812	Q9HCS7	Q9HCS7	SYF1_HUMAN	XAB2	Pre-mRNA-splicing factor SYF1
22.8806	20.6789	O43516;O43516-2;O43516-3;O43516-4	E9PB87;C9JTB9;A0A8V8TNJ8;O43516-2;O43516-3;O43516-4;O43516	WIPF1_HUMAN	WIPF1	WAS/WASL-interacting protein family member 1
22.8828	19.8302	Q6P4I2	H0YMT3;Q6P4I2	WDR73_HUMAN	WDR73	WD repeat-containing protein 73
22.8837	19.9575	Q13428-6;Q13428-7	Q13428-6;Q13428-7;E7ETY2;A0A3B3IS06	TCOF_HUMAN	TCOF1	Isoform of Q13428, Isoform 6 of Treacle protein
22.8839	19.7673	Q8N488	Q8N488	RYBP_HUMAN	RYBP	RING1 and YY1-binding protein
22.8844	20.3286	P00519;P00519-2	P00519-2;P00519	ABL1_HUMAN	ABL1	Tyrosine-protein kinase ABL1
22.8882	20.479	Q8TCU4;Q8TCU4-2;Q8TCU4-3	Q8TCU4-2;Q8TCU4-3;A0A804HJW3;A0A804HJA5;A0A804HL70;A0A804HKC0;A0A087WTU9;A0A087WV20;Q8TCU4	ALMS1_HUMAN	ALMS1	Centrosome-associated protein ALMS1
22.8897	22.346	Q96RU3;Q96RU3-2;Q96RU3-3;Q96RU3-4;Q96RU3-5	H0Y7W6;Q96RU3-2;Q96RU3-3;Q96RU3-4;Q96RU3-5;A0A8V8TQ35;A0A994J6U4;A0A994J4A3;A0A994J3U5;A0A994J3V8;Q96RU3	FNBP1_HUMAN	FNBP1	Formin-binding protein 1
22.8898	19.081	P26006	P26006-1;D6R9X8;P26006	ITA3_HUMAN	ITGA3	Integrin alpha-3
22.8928	21.4807	Q96EQ0	Q96EQ0	SGTB_HUMAN	SGTB	Small glutamine-rich tetratricopeptide repeat-containing protein beta
22.8967	20.8612	Q9NVA1;Q9NVA1-2;Q9NVA1-4	F6UTR7;Q9NVA1-2;Q9NVA1-3;Q9NVA1-4;Q9NVA1-5;B1AKV4;Q9NVA1	UQCC1_HUMAN	UQCC1	Ubiquinol-cytochrome-c reductase complex assembly factor 1
22.8993	17.9417	O95573	A0A7P0T905;A0A7P0TB52;A0A7P0TBB1;A0A7P0TBL9;A0A7P0TA76;H7BYZ7;O95573	ACSL3_HUMAN	ACSL3	Fatty acid CoA ligase Acsl3
22.9011	20.3373	Q8TBA6;Q8TBA6-2	Q8TBA6-2;Q8TBA6	GOGA5_HUMAN	GOLGA5	Golgin subfamily A member 5
22.9017	20.9314	Q9UNY4	Q9UNY4-2;Q9UNY4	TTF2_HUMAN	TTF2	Transcription termination factor 2
22.9029	22.3931	P06733-2	P06733-2	ENOA_HUMAN	ENO1	Isoform of P06733, Isoform MBP-1 of Alpha-enolase
22.9031	19.3011	Q86X02	Q86X02	CDR2L_HUMAN	CDR2L	Cerebellar degeneration-related protein 2-like
22.9066	22.1599	O15126	A0A087WU14;A0A087WXB0;O15126	SCAM1_HUMAN	SCAMP1	Secretory carrier-associated membrane protein 1
22.9076	21.0492	Q6PCB5;Q6PCB5-2	Q6PCB5-2;Q6PCB5	RSBNL_HUMAN	RSBN1L	Lysine-specific demethylase RSBN1L
22.9079	NaN	Q9P0P0	C9J391;C9J1C6;F8WBU5;H7C426;Q9P0P0	RN181_HUMAN	RNF181	E3 ubiquitin-protein ligase RNF181
22.9111	19.9109	P54259	P54259	ATN1_HUMAN	ATN1	Atrophin-1
22.9117	21.3654	Q7Z6E9;Q7Z6E9-2	A0A2R8Y880;H3BUN0;Q7Z6E9-2;Q7Z6E9-4;I3L3Y2;Q7Z6E9	RBBP6_HUMAN	RBBP6	E3 ubiquitin-protein ligase RBBP6
22.9149	22.1082	O43318;O43318-2	A0A8V8TQF2;A0A8V8TQF8;A0A8V8TQL7;A0A8V8TR17;O43318-2;O43318	M3K7_HUMAN	MAP3K7	Mitogen-activated protein kinase kinase kinase 7
22.9155	21.2755	Q9Y5N5	Q9Y5N5	N6MT1_HUMAN	N6AMT1	Methyltransferase N6AMT1
22.9172	22.8889	Q9NV35	Q9NV35	NUD15_HUMAN	NUDT15	Nucleotide triphosphate diphosphatase NUDT15
22.9249	20.7972	Q9P2Y5	E9PR71;Q9P2Y5	UVRAG_HUMAN	UVRAG	UV radiation resistance-associated gene protein
22.9254	NaN	Q9HCJ3;Q9HCJ3-2	E9PE10;Q9HCJ3-2;Q9HCJ3	RAVR2_HUMAN	RAVER2	Ribonucleoprotein PTB-binding 2
22.9256	21.1533	Q9UBS8	Q9UBS8-2;E7EP22;Q9UBS8	RNF14_HUMAN	RNF14	E3 ubiquitin-protein ligase RNF14
22.9266	23.7961	Q9UNX3	Q9UNX3	RL26L_HUMAN	RPL26L1	Ribosomal protein uL24-like
22.9301	17.159	Q9Y4E6;Q9Y4E6-2	Q9Y4E6-2;Q9Y4E6	WDR7_HUMAN	WDR7	WD repeat-containing protein 7
22.9302	20.3084	Q9BRZ2	C9JI91;Q9BRZ2-2;Q9BRZ2	TRI56_HUMAN	TRIM56	E3 ubiquitin-protein ligase TRIM56
22.9319	20.6778	Q9NZW5	C9J4Q3;C9JGI8;B8ZZG1;Q9NZW5	PALS2_HUMAN	PALS2	Protein PALS2
22.9332	22.1559	Q6I9Y2	A0A5S6STF9;Q6I9Y2	THOC7_HUMAN	THOC7	THO complex subunit 7 homolog
22.9345	19.4745	Q969T9	A6NG10;K7EIJ0;K7EIK1;K7EIN1;K7EMC9;K7ENL2;K7ESN4;Q969T9	WBP2_HUMAN	WBP2	WW domain-binding protein 2
22.9358	NaN	Q9NP81	B4DJM9;M0QWZ7;Q9NP81-2;M0R2C6;Q9NP81	SYSM_HUMAN	SARS2	Serine--tRNA ligase, mitochondrial
22.9359	27.9632	P60709	A0A6Q8PFE4;E7EVS6;A0A2R8YFE2;A0A804GS07;A6NL76;A0A804HKV3;P63267-2;I3L4N8;P62736;P68133;P63261;P60709;P63267;P68032	ACTB_HUMAN	ACTB	Actin, cytoplasmic 1
22.938	NaN	O15379;O15379-2	O15379-2;O15379	HDAC3_HUMAN	HDAC3	Histone deacetylase 3
22.9391	19.9547	Q9UMY1	Q9UMY1	NOL7_HUMAN	NOL7	Nucleolar protein 7
22.9425	20.9122	Q01082-3	Q01082-3	SPTB2_HUMAN	SPTBN1	Isoform of Q01082, Isoform 2 of Spectrin beta chain, non-erythrocytic 1
22.9451	21.6754	O14519;O14519-2	O14519-2;E9PKR4;F5GZF0;O14519;O75956	CDKA1_HUMAN	CDK2AP1	Cyclin-dependent kinase 2-associated protein 1
22.9461	18.9708	Q7Z333;Q7Z333-3;Q7Z333-4	Q7Z333-3;Q7Z333-4;X6RI79;Q7Z333	SETX_HUMAN	SETX	Probable helicase senataxin
22.9473	20.7484	Q12788	Q12788	TBL3_HUMAN	TBL3	Transducin beta-like protein 3
22.9485	20.9924	Q16254	Q16254	E2F4_HUMAN	E2F4	Transcription factor E2F4
22.9485	NaN	O00483	O00483	NDUA4_HUMAN	NDUFA4	Cytochrome c oxidase subunit NDUFA4
22.9575	20.1159	Q96JG9	H3BS19;Q96JG9	ZN469_HUMAN	ZNF469	Zinc finger protein 469
22.9673	21.2395	Q9NV96;Q9NV96-2	Q9NV96-2;Q9NV96-3;A0A669KB92;E5RG19;Q9NV96	CC50A_HUMAN	TMEM30A	Cell cycle control protein 50A
22.9691	22.3184	P31749	P31749-2;G3V3X1;G3V2I6;A0A804HJM6;A0A087WY56;P31749	AKT1_HUMAN	AKT1	RAC-alpha serine/threonine-protein kinase
22.9725	20.1529	Q92871	Q92871	PMM1_HUMAN	PMM1	Phosphomannomutase 1
22.9746	19.5356	Q13438;Q13438-2;Q13438-3;Q13438-4;Q13438-5;Q13438-6;Q13438-7;Q13438-8	Q13438-2;Q13438-3;Q13438-4;Q13438-5;Q13438-6;Q13438-7;Q13438-8;B4E321;A0A8V8TRD7;A0A8V8TRE0;A0A8V8TPZ4;A0A8V8TQI0;A0A8V8TQI2;A0A8V8TQI4;A0A8V8TQI8;A0A8V8TQI9;A0A8V8TR31;A0A8V8TR34;Q13438	OS9_HUMAN	OS9	Protein OS-9
22.9781	21.1401	Q92796;Q92796-2;Q92796-3	Q92796-2;Q92796-3;Q5JUW8;Q92796	DLG3_HUMAN	DLG3	Disks large homolog 3
22.9792	20.397	Q92625	A0A8V8TP68;A0A8V8TMV9;A0A8V8TME4;A0A3B3ISP1;Q92625	ANS1A_HUMAN	ANKS1A	Ankyrin repeat and SAM domain-containing protein 1A
22.986	20.3576	P51970	P51970	NDUA8_HUMAN	NDUFA8	NADH dehydrogenase [ubiquinone] 1 alpha subcomplex subunit 8
22.9919	20.3167	Q99985	Q99985	SEM3C_HUMAN	SEMA3C	Semaphorin-3C
22.9926	21.536	Q86XA9;Q86XA9-2	Q86XA9-2;H7C5W6;F5H619;Q86XA9	HTR5A_HUMAN	HEATR5A	HEAT repeat-containing protein 5A
22.9935	22.0595	Q96F24	Q96F24-2;Q96F24-3;Q96F24	NRBF2_HUMAN	NRBF2	Nuclear receptor-binding factor 2
22.9943	19.8524	Q6IQ26;Q6IQ26-2	A0A7P0T9H0;A0A7P0T9Z2;A0A7P0T8L1;A0A7P0T8L8;B4DFB6;A0A7P0TAF6;A0A7P0TAH5;Q6IQ26-2;A0A7P0Z4N9;Q6IQ26	DEN5A_HUMAN	DENND5A	DENN domain-containing protein 5A
22.9963	19.9638	Q01415;Q01415-2	H0YK10;B7ZAX5;Q01415-2;Q01415	GALK2_HUMAN	GALK2	N-acetylgalactosamine kinase
22.9984	NaN	Q9UET6	B7Z4K4;Q9UET6	TRM7_HUMAN	FTSJ1	Putative tRNA (cytidine(32)/guanosine(34)-2'-O)-methyltransferase
22.9988	20.672	O94905	E5RHW4;E5RJ09;O94905	ERLN2_HUMAN	ERLIN2	Erlin-2
22.9997	21.0265	Q2KHR3;Q2KHR3-2	Q2KHR3-2;A0A3B3IRW6;Q2KHR3	QSER1_HUMAN	QSER1	Glutamine and serine-rich protein 1
23.0035	20.7632	P21926	A0A2R8Y478;G8JLH6;A6NNI4;A0A087WU13;F5GXT1;A0A7I2V3T0;A0A7I2V3T7;P21926	CD9_HUMAN	CD9	CD9 antigen
23.0054	21.7161	Q5R372;Q5R372-3;Q5R372-4	A0A0U1RQY6;Q5R372-2;Q5R372-3;Q5R372-4;A0A804HKD7;A0A0C4DG54;Q5R372	RBG1L_HUMAN	RABGAP1L	Rab GTPase-activating protein 1-like
23.0056	20.7697	Q9NXA8;Q9NXA8-2;Q9NXA8-4	A0A7P0T915;Q9NXA8-2;Q9NXA8-3;Q9NXA8-4;Q9NXA8	SIR5_HUMAN	SIRT5	NAD-dependent protein deacylase sirtuin-5, mitochondrial
23.0061	22.017	Q96BP3;Q96BP3-2	D6R9Q1;H0Y8N5;Q96BP3-2;F5H7P7;Q96BP3	PPWD1_HUMAN	PPWD1	Peptidylprolyl isomerase domain and WD repeat-containing protein 1
23.0086	NaN	O43819	O43819	SCO2_HUMAN	SCO2	Protein SCO2 homolog, mitochondrial
23.0091	NaN	Q9H7N4	Q9H7N4	SFR19_HUMAN	SCAF1	Splicing factor, arginine/serine-rich 19
23.0099	21.4882	Q7Z569	J3KNN7;Q7Z569	BRAP_HUMAN	BRAP	BRCA1-associated protein
23.0111	18.8024	Q53SF7;Q53SF7-2;Q53SF7-3	A0A0X1KG75;Q53SF7-2;Q53SF7-3;A0A0D9SG04;Q53SF7	COBL1_HUMAN	COBLL1	Cordon-bleu protein-like 1
23.0117	21.0237	Q86UE8;Q86UE8-2;Q86UE8-3	J3KRK0;A0A804HIB4;Q86UE8-2;Q86UE8-3;A0A804HK10;A0A804HJX3;A0A804HJZ9;A0A804HKF1;Q86UE8	TLK2_HUMAN	TLK2	Serine/threonine-protein kinase tousled-like 2
23.0119	17.2428	O60287	O60287	NPA1P_HUMAN	URB1	Nucleolar pre-ribosomal-associated protein 1
23.013	21.4998	Q86XL3	Q86XL3-2;Q86XL3	ANKL2_HUMAN	ANKLE2	Ankyrin repeat and LEM domain-containing protein 2
23.0195	NaN	Q9NXC5	C9JTV2;C9JAQ1;Q9NXC5-2;Q9NXC5	MIO_HUMAN	MIOS	GATOR complex protein MIOS
23.0203	NaN	Q9H977;Q9H977-3;Q9H977-4	Q9H977-4;Q9H977-3;Q9H977	WDR54_HUMAN	WDR54	WD repeat-containing protein 54
23.0257	22.1696	Q9BW85	Q9BW85	YJU2_HUMAN	YJU2	Splicing factor YJU2
23.0273	21.0144	P51116	A0A994J7P9;P51116	FXR2_HUMAN	FXR2	RNA-binding protein FXR2
23.0284	22.7803	P08754	F8WE78;A0A3B3IS42;A0A3B3ITG4;A0A3B3IUA8;A0A3B3ITX3;A0A3B3IU77;A0A3B3IRK0;P04899-4;P08754;P04899;P63096	GNAI3_HUMAN	GNAI3	Guanine nucleotide-binding protein G(i) subunit alpha-3
23.0301	17.8612	Q9UL54;Q9UL54-2;Q9UL54-4	Q9UL54-2;Q9UL54-3;Q9UL54-4;Q9UL54	TAOK2_HUMAN	TAOK2	Serine/threonine-protein kinase TAO2
23.0302	22.0823	Q9NSA3	Q9NSA3	CNBP1_HUMAN	CTNNBIP1	Beta-catenin-interacting protein 1
23.0318	18.3306	P55268	P55268	LAMB2_HUMAN	LAMB2	Laminin subunit beta-2
23.0327	20.9806	Q9H3R5	H0Y9E6;B3KVZ3;Q9H3R5	CENPH_HUMAN	CENPH	Centromere protein H
23.0336	19.4702	Q9NWU1	C9J2G3;C9JQQ2;Q9NWU1-2;Q9NWU1	OXSM_HUMAN	OXSM	3-oxoacyl-[acyl-carrier-protein] synthase, mitochondrial
23.0339	20.2177	Q8TEH3;Q8TEH3-6;Q8TEH3-7	Q8TEH3-6;Q8TEH3-7;A0A0A0MS48;Q8TEH3	DEN1A_HUMAN	DENND1A	DENN domain-containing protein 1A
23.034	26.9522	P20020;P20020-1;P20020-4;P20020-6	P20020-1;P20020-2;P20020-4;P20020-5;P20020-6;P23634-2;P23634-3;P23634-4;P23634-5;P23634-6;P23634-7;P23634-8;A0A994J4Z0;P23634;P20020	AT2B1_HUMAN	ATP2B1	Plasma membrane calcium-transporting ATPase 1
23.0341	NaN	Q9NX04	V9GYI2;V9GYN4;V9GYQ8;V9GY35;Q9NX04	AIRIM_HUMAN	AIRIM	AFG2-interacting ribosome maturation factor
23.035	20.9781	Q9BW19	Q9BW19	KIFC1_HUMAN	KIFC1	Kinesin-like protein KIFC1
23.0366	22.8352	O15254	O15254-2;O15254	ACOX3_HUMAN	ACOX3	Peroxisomal acyl-coenzyme A oxidase 3
23.0381	NaN	A4D1P6;A4D1P6-2	C9J1X0;A0A804HI90;A0A804HHS8;A4D1P6-2;A4D1P6-3;A0A804HJP3;A0A804HKV2;A4D1P6	WDR91_HUMAN	WDR91	WD repeat-containing protein 91
23.0388	17.784	P53675;P53675-2	P53675-2;A0A087WV74;A0A087WXH4;P53675	CLH2_HUMAN	CLTCL1	Clathrin heavy chain 2
23.0422	18.2187	Q9Y6M5	Q9Y6M5	ZNT1_HUMAN	SLC30A1	Proton-coupled zinc antiporter SLC30A1
23.0454	18.7408	O75362	O75362	ZN217_HUMAN	ZNF217	Zinc finger protein 217
23.0469	22.5904	Q6FIF0;Q6FIF0-2	Q6FIF0-2;Q6FIF0	ZFAN6_HUMAN	ZFAND6	AN1-type zinc finger protein 6
23.0485	20.663	O14727;O14727-2;O14727-3;O14727-4;O14727-5	O14727-2;O14727-3;O14727-4;O14727-5;O14727-6;C9JLV4;O14727	APAF_HUMAN	APAF1	Apoptotic protease-activating factor 1
23.0558	21.8533	Q2NKX8	B5MDQ0;Q2NKX8	ERC6L_HUMAN	ERCC6L	DNA excision repair protein ERCC-6-like
23.0582	NaN	Q9P0L2;Q9P0L2-3	B4DIB3;A0A7I2YQC1;A0A087X0I6;A0A7I2V550;Q9P0L2-2;Q9P0L2-3;Q9P0L2	MARK1_HUMAN	MARK1	Serine/threonine-protein kinase MARK1
23.059	21.4406	Q9H6K1;Q9H6K1-2	Q5TH58;Q9H6K1-2;Q9H6K1	ILRUN_HUMAN	ILRUN	Protein ILRUN
23.0594	22.2038	Q9H467	Q9H467	CUED2_HUMAN	CUEDC2	CUE domain-containing protein 2
23.0619	18.3031	Q9UKU7;Q9UKU7-2	Q9UKU7-2;Q9UKU7	ACAD8_HUMAN	ACAD8	Isobutyryl-CoA dehydrogenase, mitochondrial
23.062	20.1232	Q8NG08	F5H1I4;Q8NG08	HELB_HUMAN	HELB	DNA helicase B
23.0686	20.7817	Q8WTW3	E9PBL8;Q8WTW3	COG1_HUMAN	COG1	Conserved oligomeric Golgi complex subunit 1
23.0693	22.1231	A0A024RA87;A0A0U1RRE1;A0A0U1RRH9;B5MCX3;B5MD47;C9IY94;C9J2Q4	C9IY94;C9J2Q4;A0A0U1RRE1;A0A0U1RRH9;B5MCX3;B5MD47;A0A024RA87	A0A024RA87_HUMAN;A0A0U1RRE1_HUMAN;A0A0U1RRH9_HUMAN;B5MCX3_HUMAN;B5MD47_HUMAN;C9IY94_HUMAN;C9J2Q4_HUMAN	SEPTIN2;SEPTIN7	Isoform of Q16181, Septin
23.072	21.159	Q16740	M0R208;Q16740	CLPP_HUMAN	CLPP	ATP-dependent Clp protease proteolytic subunit, mitochondrial
23.0727	20.5451	Q658L1;Q658L1-2	Q658L1-2;A0A804HKW2;Q658L1	SAXO2_HUMAN	SAXO2	Stabilizer of axonemal microtubules 2
23.074	19.6049	Q9NY93;Q9NY93-2	F8WDT8;G3V0G3;Q9NY93-2;H7C3E9;Q9NY93	DDX56_HUMAN	DDX56	Probable ATP-dependent RNA helicase DDX56
23.0759	19.991	Q9C0F1	Q9C0F1-2;Q9C0F1	CEP44_HUMAN	CEP44	Centrosomal protein of 44 kDa
23.0793	20.8643	Q8NHQ9	E7EX41;F5H5U2;Q8NHQ9	DDX55_HUMAN	DDX55	ATP-dependent RNA helicase DDX55
23.0806	21.1642	Q9UIM3	Q9UIM3	FKBPL_HUMAN	FKBPL	FK506-binding protein-like
23.082	20.5904	P17050	P17050	NAGAB_HUMAN	NAGA	Alpha-N-acetylgalactosaminidase
23.0843	NaN	Q9NW75	Q9NW75	GPTC2_HUMAN	GPATCH2	G patch domain-containing protein 2
23.0867	21.1745	Q9BVA0	H3BT67;H3BPK1;H3BPD8;Q9BVA0	KTNB1_HUMAN	KATNB1	Katanin p80 WD40 repeat-containing subunit B1
23.088	20.9055	P61952	P61952	GBG11_HUMAN	GNG11	Guanine nucleotide-binding protein G(I)/G(S)/G(O) subunit gamma-11
23.0917	NaN	Q9UBM7	B4E1K5;A0A804HI25;A0A804HJQ7;E9PM00;A0A8I5KRR9;Q9UBM7	DHCR7_HUMAN	DHCR7	7-dehydrocholesterol reductase
23.0949	26.5774	Q5TEC6	A0A590UJL8;Q5TEC6	H37_HUMAN	H3-7	Histone H3-7
23.0981	20.9289	O15234	J3KSY7;O15234	CASC3_HUMAN	CASC3	Protein CASC3
23.099	21.0698	Q9NQZ5	Q9NQZ5	STAR7_HUMAN	STARD7	StAR-related lipid transfer protein 7, mitochondrial
23.0992	20.264	Q15554	J3KSZ6;H3BTA7;H3BR06;U3KQ35;Q15554	TERF2_HUMAN	TERF2	Telomeric repeat-binding factor 2
23.0995	21.0335	P27816-4	E7EVA0;P27816-4;P27816-5;B5MEG9;A0A804HKE7;H7C4C5	MAP4_HUMAN	MAP4	Isoform of P27816, Isoform 4 of Microtubule-associated protein 4
23.1022	19.3932	P61966;P61966-2	P61966-2;A0A2R8YGH5;H7C1E4;P61966	AP1S1_HUMAN	AP1S1	AP-1 complex subunit sigma-1A
23.1044	20.4353	Q8NEY1;Q8NEY1-2;Q8NEY1-3;Q8NEY1-4;Q8NEY1-7	H0Y6F6;A0A0A0MRJ3;Q8NEY1-2;Q8NEY1-3;Q8NEY1-4;Q8NEY1-5;Q8NEY1-6;Q8NEY1-7;A0A8I5KSE4;Q8NEY1	NAV1_HUMAN	NAV1	Neuron navigator 1
23.1044	20.5406	Q9NPF0;Q9NPF0-2	Q9NPF0-2;Q9NPF0	CD320_HUMAN	CD320	CD320 antigen
23.1073	18.8137	Q5HYK3	B4DP72;Q5HYK3	COQ5_HUMAN	COQ5	2-methoxy-6-polyprenyl-1,4-benzoquinol methylase, mitochondrial
23.1077	20.6899	Q8IZ73;Q8IZ73-2	Q8IZ73-2;A0A087WXE2;Q8IZ73	RUSD2_HUMAN	RPUSD2	Pseudouridylate synthase RPUSD2
23.1077	19.9984	Q86WR7	D3DRR9;Q86WR7-2;Q86WR7	PRSR2_HUMAN	PROSER2	Proline and serine-rich protein 2
23.1082	20.3492	O14640;O14640-2;P54792;P54792-2	P54792-2;O14640-2;P54792;O14640	DVL1_HUMAN;DVLP1_HUMAN	DVL1;DVL1P1	Segment polarity protein dishevelled homolog DVL-1
23.1087	18.2204	Q9UIG0;Q9UIG0-2	Q9UIG0-2;Q9UIG0	BAZ1B_HUMAN	BAZ1B	Tyrosine-protein kinase BAZ1B
23.1108	19.9276	O95602	B9ZVN9;O95602	RPA1_HUMAN	POLR1A	DNA-directed RNA polymerase I subunit RPA1
23.114	20.6289	Q658P3;Q658P3-2;Q658P3-3;Q658P3-4	Q658P3-2;Q658P3-3;Q658P3-4;B8ZZX6;Q658P3	STEA3_HUMAN	STEAP3	Metalloreductase STEAP3
23.1152	20.7715	Q13496;Q13496-2	A0A8I5QJV9;A0A8I5QJL1;B7Z499;Q13496-2;A0A8I5KRS4;A0A8I5KQR6;A0A8I5KW93;A0A8I5KZ76;Q13496	MTM1_HUMAN	MTM1	Myotubularin
23.1159	22.379	Q96DX5	Q96DX5	ASB9_HUMAN	ASB9	Ankyrin repeat and SOCS box protein 9
23.1174	22.5759	O00442;O00442-2	O00442-2;O00442	RTCA_HUMAN	RTCA	RNA 3'-terminal phosphate cyclase
23.1203	21.4576	Q9H900	H3BSG1;Q9H900-2;Q9H900	ZWILC_HUMAN	ZWILCH	Protein zwilch homolog
23.1212	21.4668	Q5ZPR3;Q5ZPR3-2	H0YL10;H0YK40;H0YK59;Q5ZPR3-2;Q5ZPR3-3;Q5ZPR3-4;A0A0C4DGH0;Q5ZPR3	CD276_HUMAN	CD276	CD276 antigen
23.1257	21.887	Q9Y639;Q9Y639-1;Q9Y639-3;Q9Y639-5	Q9Y639-3;Q9Y639-5;Q9Y639-1;Q9Y639	NPTN_HUMAN	NPTN	Neuroplastin
23.1261	19.9391	P46977;P46977-2	P46977-2;P46977	STT3A_HUMAN	STT3A	Dolichyl-diphosphooligosaccharide--protein glycosyltransferase subunit STT3A
23.1276	20.3819	Q96PU5;Q96PU5-2;Q96PU5-3;Q96PU5-5	A0A6Q8PFI7;A0A6Q8PGP5;P46934-2;P46934-3;P46934-4;A0A6Q8PHJ5;Q96PU5-2;Q96PU5-3;Q96PU5-4;Q96PU5-5;Q96PU5-6;Q96PU5-7;Q96PU5-9;H0Y8X6;A0A1B0GVY1;A0A7P0Z498;P46934;Q96PU5	NED4L_HUMAN	NEDD4L	E3 ubiquitin-protein ligase NEDD4-like
23.1277	21.0013	Q86UU1;Q86UU1-2;Q86UU1-3	Q86UU1-2;Q86UU1-3;Q86UU1	PHLB1_HUMAN	PHLDB1	Pleckstrin homology-like domain family B member 1
23.1282	20.6872	O75152	E9PQ61;O75152	ZC11A_HUMAN	ZC3H11A	Zinc finger CCCH domain-containing protein 11A
23.1314	20.6788	Q92889	A0A804HKF9;Q92889	XPF_HUMAN	ERCC4	DNA repair endonuclease XPF
23.1354	21.6494	Q5T7V8	A0A8I5KSF7;A0A8I5KW97;A0A8I5KW31;Q5T7V8-2;Q5T7V8	GORAB_HUMAN	GORAB	RAB6-interacting golgin
23.1362	20.5081	Q8IX18;Q8IX18-3	Q8IX18-2;Q8IX18-3;Q8IX18-4;F5H625;Q8IX18	DHX40_HUMAN	DHX40	Probable ATP-dependent RNA helicase DHX40
23.1393	NaN	Q9NRX5	Q9NRX5	SERC1_HUMAN	SERINC1	Serine incorporator 1
23.1413	20.5481	P00167;P00167-2	P00167-2;P00167-3;P00167	CYB5_HUMAN	CYB5A	Cytochrome b5
23.1415	17.5465	P23142	B1AHL2;B1AHM7;B1AHM9;H7C1M6;P23142-2;P23142-3;P23142-4;P23142	FBLN1_HUMAN	FBLN1	Fibulin-1
23.1431	22.9767	O95149	H3BSK1;H3BTA6;H3BRI5;H3BQR0;O95149	SPN1_HUMAN	SNUPN	Snurportin-1
23.1482	20.0491	Q8WY36;Q8WY36-2	C9JA69;Q8WY36-2;Q8WY36	BBX_HUMAN	BBX	HMG box transcription factor BBX
23.1534	20.9595	Q63ZY3;Q63ZY3-2;Q63ZY3-3	Q63ZY3-2;Q63ZY3-3;K7ERU2;Q63ZY3	KANK2_HUMAN	KANK2	KN motif and ankyrin repeat domain-containing protein 2
23.1547	20.0655	Q9NX07;Q9NX07-2	Q9NX07-2;Q9NX07	TSAP1_HUMAN	TRNAU1AP	tRNA selenocysteine 1-associated protein 1
23.1547	19.6982	O95396	O95396	MOCS3_HUMAN	MOCS3	Adenylyltransferase and sulfurtransferase MOCS3
23.1555	19.8928	O75489	O75489	NDUS3_HUMAN	NDUFS3	NADH dehydrogenase [ubiquinone] iron-sulfur protein 3, mitochondrial
23.1559	NaN	A6NDR6;O00470;O00470-2;O14770;O14770-2;O14770-3;O14770-4;O14770-6;O14770-7;O14770-8;Q99687;Q99687-2;Q99687-3	O14770-2;O14770-3;O14770-4;O14770-6;O14770-7;O14770-8;H0YNY8;H0YMV2;H0YNA8;H3BLU4;O00470-2;A0A8V8TQU6;A0A8V8TPB7;U3KPR8;U3KQI2;F5GYS8;Q99687-2;Q99687-3;O00470;A6NDR6;Q99687;O14770	ME3L1_HUMAN;MEIS1_HUMAN;MEIS2_HUMAN;MEIS3_HUMAN	MEIS1;MEIS2;MEIS3;MEIS3P1	Putative homeobox protein Meis3-like 1
23.1621	19.7081	Q9Y6Q9;Q9Y6Q9-2;Q9Y6Q9-3;Q9Y6Q9-4;Q9Y6Q9-5	Q9Y6Q9-2;Q9Y6Q9-3;Q9Y6Q9-4;Q9Y6Q9-5;Q9Y6Q9	NCOA3_HUMAN	NCOA3	Nuclear receptor coactivator 3
23.1632	18.5512	O00584	D6REQ6;D6RHI9;A0A804HJZ7;A0A804HKZ2;A0A087WZM2;H0YAE9;O00584	RNT2_HUMAN	RNASET2	Ribonuclease T2
23.1637	17.7958	Q9H8M7	Q9H8M7-2;Q9H8M7	MINY3_HUMAN	MINDY3	Ubiquitin carboxyl-terminal hydrolase MINDY-3
23.1638	21.8296	Q969E4	Q969E4;Q5H9L2	TCAL3_HUMAN	TCEAL3	Transcription elongation factor A protein-like 3
23.1676	19.4918	P23497	Q9H930-1;Q9H930-2;Q9H930-3;P23497-2;P23497-3;P23497-4;P23497-5;P23497-6;P23497-7;U5Y3L1;C9JBL0;H7BYP4;E9PHV6;P23497;Q9H930	SP100_HUMAN	SP100	Nuclear autoantigen Sp-100
23.1725	20.7311	Q6PIW4;Q6PIW4-2	Q6PIW4-2;Q6PIW4	FIGL1_HUMAN	FIGNL1	Fidgetin-like protein 1
23.1738	22.3082	Q86YT6	Q86YT6	MIB1_HUMAN	MIB1	E3 ubiquitin-protein ligase MIB1
23.1766	21.6558	Q7Z6B7	Q7Z6B7-2;G5EA48;Q7Z6B7	SRGP1_HUMAN	SRGAP1	SLIT-ROBO Rho GTPase-activating protein 1
23.1797	21.735	A0A994J7X3	A0A994J7X3	A0A994J7X3_HUMAN	VASP	Isoform of P50552, Vasodilator stimulated phosphoprotein (Fragment)
23.1809	28.5272	Q71UI9-4	C9J0D1;A0A494C189;Q71UI9-2;Q71UI9-4;P0C0S5;Q71UI9	H2AV_HUMAN	H2AZ2	Isoform of Q71UI9, Isoform 4 of Histone H2A.V
23.1827	20.5103	P51884	P51884	LUM_HUMAN	LUM	Lumican
23.1829	21.2644	P31930	P31930	QCR1_HUMAN	UQCRC1	Cytochrome b-c1 complex subunit 1, mitochondrial
23.1847	20.2174	Q9UIQ6;Q9UIQ6-2;Q9UIQ6-3	Q9UIQ6-2;Q9UIQ6-3;Q9UIQ6	LCAP_HUMAN	LNPEP	Leucyl-cystinyl aminopeptidase
23.1856	21.5668	Q99856	Q99856	ARI3A_HUMAN	ARID3A	AT-rich interactive domain-containing protein 3A
23.1872	20.4727	P16591	W0S4B9;P16591-2;P16591-3;P07332-2;P07332-3;P07332-4;E7ENM8;P16591;P07332	FER_HUMAN	FER	Tyrosine-protein kinase Fer
23.1889	18.8334	O15258	Q5T091;Q5T092;A0A0A0MR06;O15258	RER1_HUMAN	RER1	Protein RER1
23.1905	20.0358	Q92540;Q92540-2;Q92540-4	Q92540-2;Q92540-4;Q92540-5;B1ALB4;E9PD50;A0A8I5KSL3;A0A8I5KYV3;Q92540	SMG7_HUMAN	SMG7	Nonsense-mediated mRNA decay factor SMG7
23.2006	19.4853	Q8IUC4	Q8IUC4-2;Q8IUC4	RHPN2_HUMAN	RHPN2	Rhophilin-2
23.2023	20.0039	Q9UL26	Q9UL26	RB22A_HUMAN	RAB22A	Ras-related protein Rab-22A
23.207	21.3093	Q96MU7;Q96MU7-2	Q96MU7-2;J3QR07;Q96MU7	YTDC1_HUMAN	YTHDC1	YTH domain-containing protein 1
23.2086	22.0093	Q92520	C9JP35;C9JMN4;Q92520	FAM3C_HUMAN	FAM3C	Protein FAM3C
23.2107	NaN	Q9NXR7	Q9NXR7	BABA2_HUMAN	BABAM2	BRISC and BRCA1-A complex member 2
23.2115	22.2372	Q96SN8;Q96SN8-2;Q96SN8-3	Q96SN8-2;Q96SN8-3;Q96SN8-4;A0A8I5QJG6;A0A8I5QKL1;F8WCI3;A0A0A0MRG9;A0A8I5KPG9;A0A8I5KRU7;A0A8I5KTP5;A0A8I5KYS3;A0A8I5KYJ8;A0A8I5KXG0;A0A8I5KXB5;Q96SN8	CK5P2_HUMAN	CDK5RAP2	CDK5 regulatory subunit-associated protein 2
23.2174	20.5904	Q4KMP7	Q4KMP7	TB10B_HUMAN	TBC1D10B	TBC1 domain family member 10B
23.2216	20.0521	Q96FZ2	D6RGK7;D6RAZ3;D6RAI0;D6R9T3;E7EMP6;Q96FZ2	HMCES_HUMAN	HMCES	Abasic site processing protein HMCES
23.2232	21.5905	Q96EV2	H0Y3K4;Q96EV2	RBM33_HUMAN	RBM33	RNA-binding protein 33
23.2234	20.3864	Q6P1L5	Q6P1L5	F117B_HUMAN	FAM117B	Protein FAM117B
23.2245	17.6197	Q9HCD6;Q9HCD6-2	Q9HCD6-2;A0A8I5KXR5;Q9HCD6	TANC2_HUMAN	TANC2	Protein TANC2
23.2268	21.927	Q9Y6D6	E5RJN9;Q9Y6D6	BIG1_HUMAN	ARFGEF1	Brefeldin A-inhibited guanine nucleotide-exchange protein 1
23.2273	21.6537	Q99674	A0A4W8W4R1;Q99674	CGRE1_HUMAN	CGREF1	Cell growth regulator with EF hand domain protein 1
23.232	16.0829	Q9BV79	Q9BV79	MECR_HUMAN	MECR	Enoyl-[acyl-carrier-protein] reductase, mitochondrial
23.2347	18.6747	O94916;O94916-2;O94916-4;O94916-5	O94916-2;O94916-4;O94916-5;O94916	NFAT5_HUMAN	NFAT5	Nuclear factor of activated T-cells 5
23.2351	23.8263	Q8N0W3;Q8N0W3-2	Q8N0W3-2;J3KSP6;Q8N0W3	FCSK_HUMAN	FCSK	L-fucose kinase
23.2358	19.8166	Q5TA45;Q5TA45-2;Q5TA45-3	C9J979;Q5TA45-2;Q5TA45-3;H0YE15;E9PNS4;E9PMA2;E9PJG0;E9PKA4;A0A087WXT8;Q5TA45	INT11_HUMAN	INTS11	Integrator complex subunit 11
23.2373	21.249	Q9NWX5	Q9NWX5	ASB6_HUMAN	ASB6	Ankyrin repeat and SOCS box protein 6
23.2383	20.1374	Q9NWT6	Q9NWT6	HIF1N_HUMAN	HIF1AN	Hypoxia-inducible factor 1-alpha inhibitor
23.239	19.7566	O95819;O95819-2;O95819-3;O95819-4;O95819-5	E7EX83;A0A0D9SEY1;O95819-2;O95819-3;O95819-4;O95819-5;H7C360;H7C0P6;E7EN19;E7ENQ1;O95819	M4K4_HUMAN	MAP4K4	Mitogen-activated protein kinase kinase kinase kinase 4
23.2391	19.866	Q15345;Q15345-3	Q15345-3;A0A0B4J2G4;A0A087X0S7;A0A087WTU1;Q15345	LRC41_HUMAN	LRRC41	Leucine-rich repeat-containing protein 41
23.2405	NaN	Q99638	Q99638	RAD9A_HUMAN	RAD9A	Cell cycle checkpoint control protein RAD9A
23.2456	22.9983	Q9NRG4	B0R0U3;Q9NRG4	SMYD2_HUMAN	SMYD2	N-lysine methyltransferase SMYD2
23.2477	NaN	A0A0S2Z377;E5RK69	A0A0S2Z377;E5RK69	A0A0S2Z377_HUMAN;E5RK69_HUMAN	ANXA6	Isoform of P08133, Annexin (Fragment)
23.2494	20.8748	Q96KR1	Q96KR1	ZFR_HUMAN	ZFR	Zinc finger RNA-binding protein
23.2554	20.498	O75449	O75449-2;O75449	KTNA1_HUMAN	KATNA1	Katanin p60 ATPase-containing subunit A1
23.2589	19.6645	O75128;O75128-2;O75128-3;O75128-7	J3KR05;O75128-2;O75128-3;O75128-4;O75128-5;O75128-7;A0A0J9YWK3;H7C1N2;A0A3B3IU00;O75128	COBL_HUMAN	COBL	Protein cordon-bleu
23.2599	20.56	A6NIH7	Q13432-2;C9JSK0;K7EJU3;K7EN86;A6NIH7;Q13432	U119B_HUMAN	UNC119B	Protein unc-119 homolog B
23.2633	21.4955	Q9H1K1;Q9H1K1-2	Q9H1K1-2;B4DNC9;B3KQ30;F5H5N2;Q9H1K1	ISCU_HUMAN	ISCU	Iron-sulfur cluster assembly enzyme ISCU
23.266	21.0909	Q9BZL4;Q9BZL4-2;Q9BZL4-3;Q9BZL4-4	K7EL81;Q9BZL4-2;Q9BZL4-3;Q9BZL4-4;Q9BZL4-5;Q9BZL4	PP12C_HUMAN	PPP1R12C	Protein phosphatase 1 regulatory subunit 12C
23.2665	23.111	Q14919;Q14919-2	Q14919-2;C9JCC6;E9PQX9;E9PNC7;Q14919	NC2A_HUMAN	DRAP1	Dr1-associated corepressor
23.2704	21.553	P08195-2	H0YH36;A0A7P0T8F1;A0A7P0T8U7;A0A7P0T853;A0A7P0TBF8;A0A7P0TAS6;P08195-2;F5GZR9;F5H867;F5H0E2	4F2_HUMAN	SLC3A2	Isoform of P08195, Isoform 2 of 4F2 cell-surface antigen heavy chain
23.2709	19.4135	O75530;O75530-2;O75530-3	E9PJK2;O75530-2;O75530-3;O75530	EED_HUMAN	EED	Polycomb protein EED
23.2736	NaN	Q9Y4Y9	B8ZZF8;Q9Y4Y9	LSM5_HUMAN	LSM5	U6 snRNA-associated Sm-like protein LSm5
23.2749	20.8685	P19447	A0A2R8Y6W8;A0A2R8Y762;A0A2R8Y5L2;A0A2R8YES7;H7C309;P19447	ERCC3_HUMAN	ERCC3	General transcription and DNA repair factor IIH helicase subunit XPB
23.2749	19.4447	Q9NVP1	Q9NVP1	DDX18_HUMAN	DDX18	ATP-dependent RNA helicase DDX18
23.2749	NaN	Q9UFG5	E7EP72;Q9UFG5	CS025_HUMAN	C19orf25	UPF0449 protein C19orf25
23.2765	19.7692	Q4G0F5	H0YCI7;Q4G0F5	VP26B_HUMAN	VPS26B	Vacuolar protein sorting-associated protein 26B
23.2769	22.0979	Q15125	Q15125	EBP_HUMAN	EBP	3-beta-hydroxysteroid-Delta(8),Delta(7)-isomerase
23.2771	15.5955	Q9H0W8	Q9H0W8-2;M0R2N0;M0QX70;M0QZC7;M0QZH1;M0QYR7;Q9H0W8	SMG9_HUMAN	SMG9	Nonsense-mediated mRNA decay factor SMG9
23.2778	21.1278	Q5TZA2	Q5TZA2	CROCC_HUMAN	CROCC	Rootletin
23.278	23.3641	Q14241	Q14241	ELOA1_HUMAN	ELOA	Elongin-A
23.2785	19.998	Q8N5C7	H0YMP4;H0YML0;H0YL61;H0YK73;Q8N5C7-3;Q8N5C7	DTWD1_HUMAN	DTWD1	tRNA-uridine aminocarboxypropyltransferase 1
23.2838	20.3234	O60294	O60294	TYW4_HUMAN	LCMT2	tRNA wybutosine-synthesizing protein 4
23.2847	NaN	Q9Y5R8	Q9Y5R8	TPPC1_HUMAN	TRAPPC1	Trafficking protein particle complex subunit 1
23.2854	20.3078	Q9BUL5;Q9BUL5-3;Q9BUL5-4	Q9BUL5-4;Q9BUL5-3;I3L1N0;Q9BUL5	PHF23_HUMAN	PHF23	PHD finger protein 23
23.2897	19.1379	Q8TDM6;Q8TDM6-4	Q8TDM6-3;Q8TDM6-4;Q8TDM6	DLG5_HUMAN	DLG5	Disks large homolog 5
23.2953	20.1288	Q9C0E2	Q9C0E2	XPO4_HUMAN	XPO4	Exportin-4
23.2976	NaN	Q9BPX7;Q9BPX7-2	Q9BPX7-2;Q9BPX7	CG025_HUMAN	C7orf25	UPF0415 protein C7orf25
23.3009	17.5068	O75964	A0A8I5KSW3;A0A8I5KT86;A0A8I5KSQ4;A0A3B3ITX4;O75964	ATP5L_HUMAN	ATP5MG	ATP synthase subunit g, mitochondrial
23.3029	NaN	O00458;O00458-2	O00458-2;O00458	IFRD1_HUMAN	IFRD1	Interferon-related developmental regulator 1
23.3123	20.7906	Q13535;Q13535-2;Q13535-3	Q13535-2;Q13535-3;A0A590UJ01;Q13535	ATR_HUMAN	ATR	Serine/threonine-protein kinase ATR
23.3136	22.2911	Q86UP3;Q86UP3-2;Q86UP3-4;Q86UP3-5	Q86UP3-2;Q86UP3-4;Q86UP3-5;E7EVZ1;Q86UP3	ZFHX4_HUMAN	ZFHX4	Zinc finger homeobox protein 4
23.3163	19.6103	O43294;O43294-2	H3BQC4;O43294-2;O43294	TGFI1_HUMAN	TGFB1I1	Transforming growth factor beta-1-induced transcript 1 protein
23.3201	19.7155	O95470	A0A8V8TLU8;A0A8V8TN35;O95470	SGPL1_HUMAN	SGPL1	Sphingosine-1-phosphate lyase 1
23.3209	21.2643	Q7RTP6	Q7RTP6	MICA3_HUMAN	MICAL3	[F-actin]-monooxygenase MICAL3
23.321	19.4814	Q969J3	G3V1P3;Q969J3	BORC5_HUMAN	BORCS5	BLOC-1-related complex subunit 5
23.321	21.1091	Q9NU22	Q9NU22	MDN1_HUMAN	MDN1	Midasin
23.3219	23.4606	Q8N573;Q8N573-5;Q8N573-8	Q8N573-5;Q8N573-8;Q8N573	OXR1_HUMAN	OXR1	Oxidation resistance protein 1
23.3227	NaN	Q9BVL4	Q9BVL4	SELO_HUMAN	SELENOO	Protein adenylyltransferase SelO, mitochondrial
23.328	20.203	Q8IV50	Q96S90;Q8IV50	LYSM2_HUMAN	LYSMD2	LysM and putative peptidoglycan-binding domain-containing protein 2
23.3294	21.4937	Q9Y244	A0A1W2PS02;A0A8V8TMM8;A0A8V8TLM3;Q9Y244	POMP_HUMAN	POMP	Proteasome maturation protein
23.3309	18.6567	Q6IQ22	A0A3B3ITT1;Q6IQ22	RAB12_HUMAN	RAB12	Ras-related protein Rab-12
23.3316	22.3543	Q8TDN6	Q8TDN6	BRX1_HUMAN	BRIX1	Ribosome biogenesis protein BRX1 homolog
23.3327	22.1371	Q8WXG6-4;Q8WXG6-5;Q8WXG6-8	Q8WXG6-2;Q8WXG6-3;Q8WXG6-4;Q8WXG6-5;Q8WXG6-6;Q8WXG6-7;Q8WXG6-8;A0A0A0MRB5;Q8WXG6	MADD_HUMAN	MADD	Isoform of Q8WXG6, Isoform 4 of MAP kinase-activating death domain protein
23.3333	21.4989	Q07092;Q07092-2	H7BZL8;Q07092-2;Q07092	COGA1_HUMAN	COL16A1	Collagen alpha-1(XVI) chain
23.3391	20.2004	Q99470	K7ELI9;Q99470	SDF2_HUMAN	SDF2	Stromal cell-derived factor 2
23.3423	21.2704	Q14050	Q14050	CO9A3_HUMAN	COL9A3	Collagen alpha-3(IX) chain
23.3463	19.9454	P52630;P52630-4	B4DLC8;A0A494C1L3;A0A494C164;A0A8V8TLG8;A0A8V8TLJ4;P52630-4;P52630	STAT2_HUMAN	STAT2	Signal transducer and activator of transcription 2
23.3486	21.2343	Q9BY77;Q9BY77-2	Q9BY77-2;F8WCX5;F6VRR5;Q9BY77	PDIP3_HUMAN	POLDIP3	Polymerase delta-interacting protein 3
23.3487	21.814	Q14517	D6RCE4;Q14517	FAT1_HUMAN	FAT1	Protocadherin Fat 1
23.35	NaN	A6NED2	G3V2I3;A6NED2	RCCD1_HUMAN	RCCD1	RCC1 domain-containing protein 1
23.3521	NaN	Q9UK99;Q9UK99-2;Q9UK99-3	B4E3U2;E9PL46;E9PJM3;Q9UK99-2;Q9UK99-3;Q9UK99	FBX3_HUMAN	FBXO3	F-box only protein 3
23.3533	18.4468	Q9HD47	Q9HD47	MOG1_HUMAN	RANGRF	Ran guanine nucleotide release factor
23.3534	19.6142	Q9H081	Q9H081	MIS12_HUMAN	MIS12	Protein MIS12 homolog
23.3563	19.0363	Q8IX90	Q8IX90	SKA3_HUMAN	SKA3	Spindle and kinetochore-associated protein 3
23.3565	22.3541	Q8N3X1;Q8N3X1-2	Q8N3X1-2;Q8N3X1	FNBP4_HUMAN	FNBP4	Formin-binding protein 4
23.3589	22.336	Q16706	Q16706	MA2A1_HUMAN	MAN2A1	Alpha-mannosidase 2
23.3589	22.4413	P01893;P30511;P30511-3	P30511-3;Q2L6G2;S6AU73;D0EV57;A0A140T9S9;A0A140T9W3;A0A140T9V0;A0A140T9Y5;A0A140T9W7;A0A140T9X6;A0A140T9C2;A0A140T9D9;A0A140T9H3;A0A140T9G0;A0A140T9A9;A0A140T9B7;A0A140T939;A0A140T953;A0A140T8X0;A0A140T997;A0A0G2JPA3;D9J307;D5H3J5;A0A0G2JH66;P30511;P01893	HLAF_HUMAN;HLAH_HUMAN	HLA-F;HLA-H	Putative HLA class I histocompatibility antigen, alpha chain H
23.3591	21.2522	Q02224;Q02224-3	Q02224-3;Q02224	CENPE_HUMAN	CENPE	Centromere-associated protein E
23.3619	20.7868	O75410;O75410-2;O75410-7;O75410-9	O75410-10;E7EVI4;E7ET87;H0YBT8;H0YAY0;B4E3H6;O75410-7;O75410-8;O75410-9;O75410-2;O75410-3;O75410-4;O75410-5;O75410-6;E5RFM9;O75410	TACC1_HUMAN	TACC1	Transforming acidic coiled-coil-containing protein 1
23.3626	22.7675	Q9UBX8;Q9UBX8-2	Q9UBX8-2;G3XA83;Q9UBX8	B4GT6_HUMAN	B4GALT6	Beta-1,4-galactosyltransferase 6
23.3627	20.1655	Q9Y4G6	H0YMT1;A0A1B0GVU7;Q9Y4G6	TLN2_HUMAN	TLN2	Talin-2
23.3628	NaN	A7E2Y1	A0A6E1W127;A7E2Y1	MYH7B_HUMAN	MYH7B	Myosin-7B
23.3631	22.9261	Q8N122	Q8N122-3;A0A8V8TMD9;Q8N122	RPTOR_HUMAN	RPTOR	Regulatory-associated protein of mTOR
23.3632	20.4712	O00423;O00423-3	O00423-3;F8W717;A0A3B3IU69;O00423	EMAL1_HUMAN	EML1	Echinoderm microtubule-associated protein-like 1
23.3633	21.7339	Q96JB1;Q96JB1-2	A0A075B6F3;H0Y7V4;Q96JB1-2;Q96JB1	DYH8_HUMAN	DNAH8	Dynein axonemal heavy chain 8
23.3655	23.2252	Q9NX24	Q9NX24	NHP2_HUMAN	NHP2	H/ACA ribonucleoprotein complex subunit 2
23.3676	21.059	P16035	P16035	TIMP2_HUMAN	TIMP2	Metalloproteinase inhibitor 2
23.3688	19.4423	Q9Y4P1;Q9Y4P1-6	C9JIK8;H0Y2Y0;Q9Y4P1-2;Q9Y4P1-6;F2Z2K8;Q9Y4P1	ATG4B_HUMAN	ATG4B	Cysteine protease ATG4B
23.369	21.8662	Q9Y3Y2;Q9Y3Y2-3;Q9Y3Y2-4	X6R700;Q9Y3Y2-3;Q9Y3Y2-4;Q9Y3Y2	CHTOP_HUMAN	CHTOP	Chromatin target of PRMT1 protein
23.3701	21.0708	Q6P1R4	H0YGW8;J3QLE4;Q6P1R4	DUS1L_HUMAN	DUS1L	tRNA-dihydrouridine(16/17) synthase [NAD(P)(+)]-like
23.3705	19.5925	Q9Y6D9;Q9Y6D9-4	Q9Y6D9-3;Q9Y6D9-4;Q9Y6D9	MD1L1_HUMAN	MAD1L1	Mitotic spindle assembly checkpoint protein MAD1
23.3706	20.2863	P35052	H7BZL4;H7C410;H7C024;P35052	GPC1_HUMAN	GPC1	Glypican-1
23.375	21.5108	Q96B97	Q5JPT2;Q96B97-2;Q96B97-3;A0A8V8TQD8;A0A8V8TQF6;A0A8V8TQG3;A0A8V8TQU1;A0A8V8TPM1;A0A8V8TQ02;A0A8V8TNW8;A0A8V8TP27;A0A8V8TP33;A0A8V8TP40;A0A8V8TP63;A0A8V8TP69;A0A8V8TNL0;A0A8V8TNP7;A0A8V8TNS8;A0A8V8TNT5;Q96B97	SH3K1_HUMAN	SH3KBP1	SH3 domain-containing kinase-binding protein 1
23.3805	21.6746	Q96JG6;Q96JG6-3	C9JA29;Q96JG6-2;Q96JG6-3;Q96JG6	VPS50_HUMAN	VPS50	Syndetin
23.3813	23.7446	O43818	O43818	U3IP2_HUMAN	RRP9	U3 small nucleolar RNA-interacting protein 2
23.3837	18.0197	O00311	O00311	CDC7_HUMAN	CDC7	Cell division cycle 7-related protein kinase
23.3899	20.1719	O95081	O95081-2;A0A0C4DG34;O95081	AGFG2_HUMAN	AGFG2	Arf-GAP domain and FG repeat-containing protein 2
23.3908	22.1876	O75947	O75947	ATP5H_HUMAN	ATP5PD	ATP synthase subunit d, mitochondrial
23.3912	20.8012	Q15811;Q15811-10;Q15811-2;Q15811-7;Q15811-8;Q15811-9	F8W7U0;H0Y7J7;Q15811-2;Q15811-3;Q15811-4;Q15811-6;Q15811-7;Q15811-8;Q15811-9;Q15811-10;Q15811-11;Q15811-12;Q15811	ITSN1_HUMAN	ITSN1	Intersectin-1
23.3925	21.3502	Q9BTE1	Q9BTE1-2;Q9BTE1-3;H3BUD2;H3BS05;H3BR94;Q9BTE1	DCTN5_HUMAN	DCTN5	Dynactin subunit 5
23.3926	19.4842	Q969S9;Q969S9-2;Q969S9-3	D6RAL1;Q969S9-2;Q969S9-3;Q969S9-4;Q969S9-5;Q969S9	RRF2M_HUMAN	GFM2	Ribosome-releasing factor 2, mitochondrial
23.3931	19.6025	Q9P2X3	J3KT25;A0A3B3ITH3;J3QRS6;Q9P2X3	IMPCT_HUMAN	IMPACT	Protein IMPACT
23.394	19.6989	O60244	O60244	MED14_HUMAN	MED14	Mediator of RNA polymerase II transcription subunit 14
23.395	NaN	Q99797	Q99797	MIPEP_HUMAN	MIPEP	Mitochondrial intermediate peptidase
23.395	19.553	Q12789;Q12789-3	Q12789-3;Q12789	TF3C1_HUMAN	GTF3C1	General transcription factor 3C polypeptide 1
23.3953	21.9351	Q9BRP8-2	Q9BRP8-2	PYM1_HUMAN	PYM1	Isoform of Q9BRP8, Isoform 2 of Partner of Y14 and mago
23.3972	19.9962	P49848;P49848-2;P49848-3	J3KR72;C9J088;C9JFL8;P49848-2;P49848-3;P49848-4;A0A8I5KRU1;A0A8I5KQQ6;P49848	TAF6_HUMAN	TAF6	Transcription initiation factor TFIID subunit 6
23.4001	19.1967	Q9ULK4;Q9ULK4-3;Q9ULK4-4;Q9ULK4-5	Q9ULK4-2;Q9ULK4-3;Q9ULK4-4;Q9ULK4-5;Q9ULK4-6;Q5JWT2;Q9ULK4	MED23_HUMAN	MED23	Mediator of RNA polymerase II transcription subunit 23
23.4021	21.9039	Q9Y5A7;Q9Y5A7-2	Q9Y5A7-2;H3BM74;H3BM14;H7C5N1;Q9Y5A7	NUB1_HUMAN	NUB1	NEDD8 ultimate buster 1
23.4024	19.3128	Q86Y37;Q86Y37-2	Q86Y37-2;Q86Y37-4;Q86Y37	CACL1_HUMAN	CACUL1	CDK2-associated and cullin domain-containing protein 1
23.4073	20.3188	Q7Z2E3;Q7Z2E3-11;Q7Z2E3-7;Q7Z2E3-8;Q7Z2E3-9	Q7Z2E3-2;Q7Z2E3-3;Q7Z2E3-4;Q7Z2E3-5;Q7Z2E3-6;Q7Z2E3-7;Q7Z2E3-8;Q7Z2E3-9;C9J8U3;A0A0A0MRW7;A0A5K1VW64;Q7Z2E3-10;Q7Z2E3-11;Q7Z2E3	APTX_HUMAN	APTX	Aprataxin
23.4078	22.3548	O43427;O43427-2	O43427-2;E9PSD3;E9PJW6;O43427	FIBP_HUMAN	FIBP	Acidic fibroblast growth factor intracellular-binding protein
23.4095	18.2189	P21359;P21359-2;P21359-6	P21359-2;P21359-6;H0Y465;A0A8I5KSM3;A0A8I5KSC3;A0A8Q3WL04;A0A8I5KWR6;A0A8I5KWT7;A0A8I5KYK6;J3QSG6;P21359	NF1_HUMAN	NF1	Neurofibromin
23.4113	NaN	Q9BWH6;Q9BWH6-2	H3BRE8;Q9BWH6-2;Q9BWH6	RPAP1_HUMAN	RPAP1	RNA polymerase II-associated protein 1
23.4125	24.1031	P25054;P25054-2	E9PFT7;P25054-2;P25054-3;P25054	APC_HUMAN	APC	Adenomatous polyposis coli protein
23.4149	21.3147	Q6ZS17;Q6ZS17-2;Q6ZS17-3;Q6ZS17-4	Q6ZS17-2;Q6ZS17-3;Q6ZS17-4;A0A0A0MTL6;Q6ZS17	RIPR1_HUMAN	RIPOR1	Rho family-interacting cell polarization regulator 1
23.4159	NaN	Q9H497	Q9H497-2;Q5W0C6;Q9H497	TOR3A_HUMAN	TOR3A	Torsin-3A
23.4172	NaN	Q9BRP1	Q9BRP1	PDD2L_HUMAN	PDCD2L	Programmed cell death protein 2-like
23.4185	22.0192	Q6EMK4	Q6EMK4	VASN_HUMAN	VASN	Vasorin
23.4199	21.0797	O94967;O94967-2;O94967-3;O94967-4	O94967-2;O94967-3;O94967-4;O94967	WDR47_HUMAN	WDR47	WD repeat-containing protein 47
23.4201	19.7676	Q8TD55	Q8TD55-2;Q8TD55	PKHO2_HUMAN	PLEKHO2	Pleckstrin homology domain-containing family O member 2
23.4221	22.6852	O00461	F8W785;O00461	GOLI4_HUMAN	GOLIM4	Golgi integral membrane protein 4
23.423	22.4781	Q92845	Q92845-2;Q92845-3;Q92845-4;Q92845	KIFA3_HUMAN	KIFAP3	Kinesin-associated protein 3
23.4243	NaN	Q9H3U1	Q9H3U1	UN45A_HUMAN	UNC45A	Protein unc-45 homolog A
23.4294	19.8676	Q4G176	A0A3B3ISK9;F5H755;F5H5A1;F5H362;Q4G176	ACSF3_HUMAN	ACSF3	Malonate--CoA ligase ACSF3, mitochondrial
23.4328	21.3671	Q9H2K8	G3V1Q8;Q9H2K8	TAOK3_HUMAN	TAOK3	Serine/threonine-protein kinase TAO3
23.4358	21.6929	Q8IWZ3-3	H3BLS9;Q8IWZ3-2;Q8IWZ3-3;E9PDP5	ANKH1_HUMAN	ANKHD1	Isoform of Q8IWZ3, Isoform 3 of Ankyrin repeat and KH domain-containing protein 1
23.4375	22.0114	P51809;P51809-3	P51809-2;P51809-3;P51809	VAMP7_HUMAN	VAMP7	Vesicle-associated membrane protein 7
23.4385	21.906	Q8IVL5;Q8IVL5-2	Q8IVL5-2;Q8IVL5	P3H2_HUMAN	P3H2	Prolyl 3-hydroxylase 2
23.4395	19.7962	Q96JC1;Q96JC1-2	Q96JC1-2;Q96JC1	VPS39_HUMAN	VPS39	Vam6/Vps39-like protein
23.4413	20.6666	Q70CQ2	Q70CQ2-2;Q70CQ2-3;A0A0C4DG73;Q70CQ2	UBP34_HUMAN	USP34	Ubiquitin carboxyl-terminal hydrolase 34
23.4439	19.4852	P05543	P05543	THBG_HUMAN	SERPINA7	Thyroxine-binding globulin
23.4455	23.4102	Q5K651	C9JKF1;Q5K651	SAMD9_HUMAN	SAMD9	Sterile alpha motif domain-containing protein 9
23.4467	20.2094	P01040	C9J0E4;P01040	CYTA_HUMAN	CSTA	Cystatin-A
23.4508	21.2459	Q9H939	Q9H939-2;Q9H939	PPIP2_HUMAN	PSTPIP2	Proline-serine-threonine phosphatase-interacting protein 2
23.451	19.8414	Q9H089	Q9H089	LSG1_HUMAN	LSG1	Large subunit GTPase 1 homolog
23.4518	21.8591	Q8IV38	G3V0G5;Q8IV38	ANKY2_HUMAN	ANKMY2	Ankyrin repeat and MYND domain-containing protein 2
23.4557	20.859	Q9BWW4;Q9BWW4-2;Q9BWW4-3	Q9BWW4-3;Q9BWW4-2;D6RAC5;P81877-2;P81877-3;P81877-4;P81877-5;Q9BWG4-2;U3KQ46;A0A087X159;A0A087WVT6;Q9BWG4;Q9BWW4;P81877	SSBP3_HUMAN	SSBP3	Single-stranded DNA-binding protein 3
23.4579	19.8715	Q86UA1	Q86UA1-2;Q86UA1	PRP39_HUMAN	PRPF39	Pre-mRNA-processing factor 39
23.4593	22.0084	Q8IYB7	Q8IYB7-2;Q8IYB7-3;Q8IYB7-4;Q8IYB7-5;C9JGP4;Q8IYB7	DI3L2_HUMAN	DIS3L2	DIS3-like exonuclease 2
23.4636	21.1833	Q9BTU6	E9PAM4;Q9BTU6	P4K2A_HUMAN	PI4K2A	Phosphatidylinositol 4-kinase type 2-alpha
23.464	20.6963	Q13315	A0A6Q8PH76;E9PIN0;Q13315	ATM_HUMAN	ATM	Serine-protein kinase ATM
23.4646	20.6881	Q13614	A0A6Q8PGS5;A0A6Q8PHL9;A0A6Q8PHS7;C9JEX3;Q13614-2;Q13614	MTMR2_HUMAN	MTMR2	Myotubularin-related protein 2
23.4656	20.8266	Q8NC96	A0A1W2PNT6;A0A1W2PR09;A0A1W2PRW5;A0A1W2PRL5;A0A1W2PRM0;F5GYH1;F5H2U7;Q8NC96	NECP1_HUMAN	NECAP1	Adaptin ear-binding coat-associated protein 1
23.4657	21.3791	Q9BTV5	M0R366;Q9BTV5	FSD1_HUMAN	FSD1	Fibronectin type III and SPRY domain-containing protein 1
23.467	18.655	P62380	Q7Z6U0;Q7Z6U1;Q7Z6U2;P62380	TBPL1_HUMAN	TBPL1	TATA box-binding protein-like 1
23.4673	20.1898	Q13190	Q13190-2;Q13190	STX5_HUMAN	STX5	Syntaxin-5
23.4683	21.4045	Q92989	Q92989-2;E9PL17;Q92989	CLP1_HUMAN	CLP1	Polyribonucleotide 5'-hydroxyl-kinase Clp1
23.4712	19.4089	Q6YHU6;Q6YHU6-3	B5MC89;B6ZDE5;Q6YHU6-3;Q6YHU6-5;Q6YHU6-6;F5H3M9;Q6YHU6	THADA_HUMAN	THADA	Thyroid adenoma-associated protein
23.4749	NaN	Q9P2N7;Q9P2N7-2;Q9P2N7-3;Q9P2N7-4;Q9P2N7-5	Q9P2N7-2;Q9P2N7-3;Q9P2N7-4;Q9P2N7-5;A0A0C4DG80;Q9P2N7;Q9P2J3	KLH13_HUMAN	KLHL13	Kelch-like protein 13
23.4813	19.8828	Q9H4X1;Q9H4X1-2	Q9H4X1-2;Q9H4X1	RGCC_HUMAN	RGCC	Regulator of cell cycle RGCC
23.4815	NaN	O00534	B4DHS6;O00534-2;O00534-3;O00534-4;O00534	VMA5A_HUMAN	VWA5A	von Willebrand factor A domain-containing protein 5A
23.4829	NaN	O00712;O00712-4;O00712-5	A0A2R8Y7V8;A0A1B0GU97;A0A1B0GTC1;A0A1B0GWI9;A0A1B0GWJ4;A0A1B0GWB8;A0A1B0GVN4;A0A1B0GW37;O00712-4;O00712-5;A0A0A0MRX8;Q5VW26;Q5VW27;Q5VW30;U3KQE8;O00712	NFIB_HUMAN	NFIB	Nuclear factor 1 B-type
23.4845	22.4431	Q8N1Q1	Q8N1Q1	CAH13_HUMAN	CA13	Carbonic anhydrase 13
23.4857	22.7863	Q8IX04;Q8IX04-6	Q8IX04-2;Q8IX04-3;Q8IX04-4;Q8IX04-6;Q8IX04	UEVLD_HUMAN	UEVLD	Ubiquitin-conjugating enzyme E2 variant 3
23.4869	23.5574	Q8NHZ8	Q8NHZ8	CDC26_HUMAN	CDC26	Anaphase-promoting complex subunit CDC26
23.4871	21.8992	Q96A73	A0A087WT18;Q96A73-2;Q96A73-3;Q96A73	P33MX_HUMAN	KIAA1191	Putative monooxygenase p33MONOX
23.4884	21.1012	Q8WVV9;Q8WVV9-4;Q8WVV9-5	C9IYN3;C9JJZ7;V9GYK2;H7BXH8;Q8WVV9-2;Q8WVV9-3;Q8WVV9-4;Q8WVV9-5;B7WPG3;Q8WVV9	HNRLL_HUMAN	HNRNPLL	Heterogeneous nuclear ribonucleoprotein L-like
23.4887	20.6967	Q6GQQ9;Q6GQQ9-2	Q8TE49-2;Q6GQQ9-2;H0YN66;H0YMI7;Q5SZ59;Q8TE49;Q6GQQ9	OTU7B_HUMAN	OTUD7B	OTU domain-containing protein 7B
23.4949	19.4375	P51649;P51649-2	C9J8Q5;A0A5F9ZI23;A0A5F9ZH98;P51649-2;P51649	SSDH_HUMAN	ALDH5A1	Succinate-semialdehyde dehydrogenase, mitochondrial
23.4952	21.1142	Q5VW36	Q5VW36	FOCAD_HUMAN	FOCAD	Focadhesin
23.496	NaN	Q9NUJ1	Q9NUJ1-2;Q9NUJ1-3;Q9NUJ1	ABHDA_HUMAN	ABHD10	Palmitoyl-protein thioesterase ABHD10, mitochondrial
23.4967	21.8382	O95825	A6NMA8;O95825	QORL1_HUMAN	CRYZL1	Quinone oxidoreductase-like protein 1
23.4968	NaN	Q9UBB6;Q9UBB6-2	Q9UBB6-2;Q9UBB6	NCDN_HUMAN	NCDN	Neurochondrin
23.4991	22.1582	Q9P2D3	Q9P2D3	HTR5B_HUMAN	HEATR5B	HEAT repeat-containing protein 5B
23.5	21.1376	Q9H3G5	H7C218;H7C0X5;Q9H3G5	CPVL_HUMAN	CPVL	Probable serine carboxypeptidase CPVL
23.5033	28.1067	Q9BVL2;Q9BVL2-3	Q5JRG1;H7BYF2;Q9BVL2-2;Q9BVL2-3;A0A8Q3WLQ2;A0A8Q3WKL7;A0A8Q3WKK3;A0A8Q3WKK5;A0A8Q3WKQ7;Q9BVL2	NUP58_HUMAN	NUP58	Nucleoporin p58/p45
23.5038	NaN	O14936;O14936-2;O14936-3;O14936-4;O14936-6	A0A2R8Y3B3;A0A2R8Y6F8;A0A7I2RJN6;A0A2R8YE77;A0A2R8YFN5;A0A2R8YEK3;A0A2U3TZN6;A0A2U3TZM1;A0A2U3TZM4;Q5JS79;O14936-2;O14936-3;O14936-4;O14936-6;O14936	CSKP_HUMAN	CASK	Peripheral plasma membrane protein CASK
23.5056	18.628	P15735;P15735-2	J3KNN3;H3BTW6;H3BP07;H3BN16;P15735-2;P15735	PHKG2_HUMAN	PHKG2	Phosphorylase b kinase gamma catalytic chain, liver/testis isoform
23.5071	21.5282	Q9UBW7	Q9UBW7	ZMYM2_HUMAN	ZMYM2	Zinc finger MYM-type protein 2
23.509	21.6078	Q92621	Q92621	NU205_HUMAN	NUP205	Nuclear pore complex protein Nup205
23.5092	20.0087	O15381	E7EWK7;O15381-5;E9PH71;E9PGD8;O15381	NVL_HUMAN	NVL	Nuclear valosin-containing protein-like
23.5092	21.586	Q96Q15;Q96Q15-2	J3KRA9;Q96Q15-2;Q96Q15-3;Q96Q15-4;Q96Q15	SMG1_HUMAN	SMG1	Serine/threonine-protein kinase SMG1
23.513	21.6893	Q9UPQ9-1	H0Y720;Q9UPQ9-1;Q9UPQ9	TNR6B_HUMAN	TNRC6B	Isoform of Q9UPQ9, Isoform 2 of Trinucleotide repeat-containing gene 6B protein
23.5143	19.0207	P31483	P31483-2;C9JTN7;F8W8I6;P31483	TIA1_HUMAN	TIA1	Cytotoxic granule associated RNA binding protein TIA1
23.5154	25.649	P34931	Q53FA3;P34931	HS71L_HUMAN	HSPA1L	Heat shock 70 kDa protein 1-like
23.5169	19.658	P20936;P20936-2;P20936-4	P20936-2;P20936-3;P20936-4;E9PGC0;P20936	RASA1_HUMAN	RASA1	Ras GTPase-activating protein 1
23.5171	21.6113	O95219	F8W9T3;O95219	SNX4_HUMAN	SNX4	Sorting nexin-4
23.519	21.5647	Q13769	Q13769	THOC5_HUMAN	THOC5	THO complex subunit 5 homolog
23.5191	20.7247	P57737-3	P57737-2;P57737-3;P57737-4;A0A0A6YYL4;P57737	CORO7_HUMAN	CORO7	Isoform of P57737, Isoform 3 of Coronin-7
23.5242	25.1413	P09104	P09104-2;F5H0C8;P09104	ENOG_HUMAN	ENO2	Gamma-enolase
23.5279	21.1537	O75676;O75676-2	A0A0A6YYC0;E9PJN1;O75676-2;O75676	KS6A4_HUMAN	RPS6KA4	Ribosomal protein S6 kinase alpha-4
23.5306	22.7502	Q96EY4	D6RC31;D6RA57;D6RE67;H0Y9X1;Q96EY4	TMA16_HUMAN	TMA16	Translation machinery-associated protein 16
23.5322	21.7814	Q92785	J3KMZ8;A0A994J6A8;A0A994J6N1;A0A994J414;A0A994J426;Q92785	REQU_HUMAN	DPF2	Zinc finger protein ubi-d4
23.534	22.4034	Q14807;Q14807-2	Q14807-2;A0A8I5QJC5;A0A8I5QJF2;A0A8I5QKY3;A0A8I5QL17;H3BTH5;H3BRB3;A0A8I5KQ45;A0A8I5KRF7;A0A8I5KSP6;A0A8I5KTF7;A0A8I5KW08;A0A8I5KXF2;A0A8I5KXF9;Q14807	KIF22_HUMAN	KIF22	Kinesin-like protein KIF22
23.5393	21.5113	Q9BZQ8	Q9BZQ8	NIBA1_HUMAN	NIBAN1	Protein Niban 1
23.5434	20.3624	P39880;P39880-2;P39880-3;P39880-4;P39880-5;P39880-6	A0A2R8Y852;A0A2R8YDI1;P39880-5;P39880-6;P39880-2;P39880-3;P39880-4;Q13948-10;Q13948-2;Q13948-9;Q13948;P39880	CUX1_HUMAN	CUX1	Homeobox protein cut-like 1
23.5461	NaN	Q9Y2Q5	Q9Y2Q5-2;Q9Y2Q5-3;Q9Y2Q5	LTOR2_HUMAN	LAMTOR2	Ragulator complex protein LAMTOR2
23.5468	22.3341	P16333	C9J869;C9J0K5;C9JVV5;C9K098;H7C5C7;P16333	NCK1_HUMAN	NCK1	Cytoplasmic protein NCK1
23.548	21.903	Q00536;Q00536-2;Q00536-3	H0YBX5;Q00536-2;Q00536-3;E5RIU4;E5RIY8;E5RJM2;E5RGN0;Q00536	CDK16_HUMAN	CDK16	Cyclin-dependent kinase 16
23.548	21.2375	O60306	O60306	AQR_HUMAN	AQR	RNA helicase aquarius
23.5484	16.8954	Q5H9L4;Q5H9L4-2;Q5H9L4-3	Q5H9L4-2;Q5H9L4-3;Q5H9L4	TAF7L_HUMAN	TAF7L	Transcription initiation factor TFIID subunit 7-like
23.5551	21.9221	Q6PD74;Q6PD74-2	Q6PD74-2;Q6PD74	AAGAB_HUMAN	AAGAB	Alpha- and gamma-adaptin-binding protein p34
23.5559	21.3601	O75385	O75385	ULK1_HUMAN	ULK1	Serine/threonine-protein kinase ULK1
23.5582	21.3271	P48382;P48382-2	F6R6G4;P48382-2;F8W689;F6S3S0;A0A0A0MSQ2;A0A0A0MT34;A0A0A0MSM9;F6X9D6;F6UE82;P48382	RFX5_HUMAN	RFX5	DNA-binding protein RFX5
23.5583	20.9211	Q8IXW5;Q8IXW5-2	Q8IXW5-2;Q8IXW5	RPAP2_HUMAN	RPAP2	Putative RNA polymerase II subunit B1 CTD phosphatase RPAP2
23.5589	21.3164	Q92997;Q92997-2	Q92997-2;Q92997	DVL3_HUMAN	DVL3	Segment polarity protein dishevelled homolog DVL-3
23.5605	22.8413	Q12899	Q12899	TRI26_HUMAN	TRIM26	Tripartite motif-containing protein 26
23.565	22.1595	Q96T17;Q96T17-2;Q96T17-4	Q96T17-2;Q96T17-3;Q96T17-4;Q96T17	MA7D2_HUMAN	MAP7D2	MAP7 domain-containing protein 2
23.5655	21.9291	O15116	O15116	LSM1_HUMAN	LSM1	U6 snRNA-associated Sm-like protein LSm1
23.5705	22.5683	O43491-4	H0Y5B0;O43491-4;E9PMG5;E9PK52;E9PHY5;A0A994J5B1	E41L2_HUMAN	EPB41L2	Isoform of O43491, Isoform 4 of Band 4.1-like protein 2
23.5707	NaN	Q9BUE6;Q9BUE6-2	Q5TBE2;Q9BUE6-2;Q9BUE6	ISCA1_HUMAN	ISCA1	Iron-sulfur cluster assembly 1 homolog, mitochondrial
23.5717	20.878	Q9Y3C1	D6RIC3;D6RC60;Q9Y3C1-2;Q9Y3C1-3;A0A0C4DGU5;Q9Y3C1	NOP16_HUMAN	NOP16	Nucleolar protein 16
23.5724	21.867	Q08188	A0A494C0J7;Q08188	TGM3_HUMAN	TGM3	Protein-glutamine gamma-glutamyltransferase E
23.5724	23.854	Q96SY0;Q96SY0-3;Q96SY0-4	B4DVT3;H3BRY6;B4DJL6;Q96SY0-3;Q96SY0-4;Q96SY0	INT14_HUMAN	INTS14	Integrator complex subunit 14
23.5745	21.1553	Q04721	Q04721	NOTC2_HUMAN	NOTCH2	Neurogenic locus notch homolog protein 2
23.5773	21.4917	Q96HN2;Q96HN2-2	Q96HN2-2;Q96HN2	SAHH3_HUMAN	AHCYL2	Adenosylhomocysteinase 3
23.5782	17.6732	Q5SRE5	Q5SRE5	NU188_HUMAN	NUP188	Nucleoporin NUP188
23.5787	21.1581	Q9NUP7	Q9NUP7	TRM13_HUMAN	TRMT13	tRNA:m(4)X modification enzyme TRM13 homolog
23.5849	18.5193	O75582	G3V2D1;O75582-2;A0A0A6YYC0;E9PJN1;A0A3B3ISL8;O75676-2;O75676;O75582	KS6A5_HUMAN	RPS6KA5	Ribosomal protein S6 kinase alpha-5
23.585	21.8224	Q9UEY8;Q9UEY8-2	Q9UEY8-2;Q9UEY8	ADDG_HUMAN	ADD3	Gamma-adducin
23.5855	17.6841	Q13049	Q13049	TRI32_HUMAN	TRIM32	E3 ubiquitin-protein ligase TRIM32
23.5859	20.3358	O94829	O94829	IPO13_HUMAN	IPO13	Importin-13
23.5873	18.0742	Q9HBD1;Q9HBD1-4;Q9HBD1-6	Q9HBD1-4;Q9HBD1-6;Q9HBD1	RC3H2_HUMAN	RC3H2	Roquin-2
23.5891	22.2332	O43164;O43164-2	O43164-2;O43164	PJA2_HUMAN	PJA2	E3 ubiquitin-protein ligase Praja-2
23.5904	21.3336	Q99496	Q99496-2;X6RFN3;Q99496	RING2_HUMAN	RNF2	E3 ubiquitin-protein ligase RING2
23.5924	23.8541	P62633;P62633-2;P62633-3;P62633-4;P62633-5;P62633-6;P62633-7;P62633-8	D6RAT4;P62633-3;P62633-4;P62633-5;P62633-6;P62633-7;P62633-8;P62633-2;P62633	CNBP_HUMAN	CNBP	CCHC-type zinc finger nucleic acid binding protein
23.5958	21.4283	Q9HD34	Q9HD34	LYRM4_HUMAN	LYRM4	LYR motif-containing protein 4
23.5973	22.1758	Q9Y2I7	Q9Y2I7-4;C9JL08;E9PDH4;Q9Y2I7	FYV1_HUMAN	PIKFYVE	1-phosphatidylinositol 3-phosphate 5-kinase
23.5987	NaN	Q9HAD4	D6RE66;D6RBY6;Q9HAD4-2;Q9HAD4	WDR41_HUMAN	WDR41	WD repeat-containing protein 41
23.6013	NaN	Q9UHJ6	A0A0B4J2A0;Q9UHJ6	SHPK_HUMAN	SHPK	Sedoheptulokinase
23.6031	22.4457	P16070;P16070-10;P16070-11;P16070-12;P16070-13;P16070-14;P16070-16;P16070-17;P16070-18;P16070-3;P16070-4;P16070-5;P16070-6;P16070-7;P16070-8	P16070-10;P16070-11;P16070-12;P16070-13;P16070-14;P16070-16;P16070-17;P16070-15;P16070-18;H0YDX6;H0YCV9;H0YDW7;H0YD13;H0YD17;H0Y5E4;H0Y2P0;P16070-3;P16070-4;P16070-5;P16070-6;P16070-7;P16070-8;P16070-9;P16070	CD44_HUMAN	CD44	CD44 antigen
23.6032	22.4925	P13497;P13497-2;P13497-4;P13497-5;P13497-6	P13497-2;P13497-4;P13497-5;P13497-6;P13497	BMP1_HUMAN	BMP1	Bone morphogenetic protein 1
23.6049	21.1805	O75376	J3KS51;O75376-2;O75376-3;E7EVU5;E7EW50;H0Y459;A0A994J5B8;O75376	NCOR1_HUMAN	NCOR1	Nuclear receptor corepressor 1
23.6072	18.2121	Q9P0J1;Q9P0J1-2	Q9P0J1-2;Q9P0J1	PDP1_HUMAN	PDP1	[Pyruvate dehydrogenase [acetyl-transferring]]-phosphatase 1, mitochondrial
23.6074	18.254	Q9BZL6;Q9BZL6-3	M0QZC2;Q9BZL6-2;Q9BZL6-3;Q9BZL6	KPCD2_HUMAN	PRKD2	Serine/threonine-protein kinase D2
23.6075	23.2608	Q9BXP5-3;Q9BXP5-4	Q9BXP5-3;Q9BXP5-4;Q9BXP5-5	SRRT_HUMAN	SRRT	Isoform of Q9BXP5, Isoform 3 of Serrate RNA effector molecule homolog
23.6076	24.7894	P35232	E7ESE2;C9JZ20;C9JW96;P35232-2;E9PCW0;P35232	PHB1_HUMAN	PHB1	Prohibitin 1
23.6087	19.6942	Q9NUD5;Q9NUD5-2	Q9NUD5-2;Q9NUD5	ZCHC3_HUMAN	ZCCHC3	Zinc finger CCHC domain-containing protein 3
23.61	20.7632	Q9BVQ7	H0YCA5;Q9BVQ7-2;Q9BVQ7	AFG2B_HUMAN	AFG2B	ATPase family gene 2 protein homolog B
23.6102	NaN	M0QZM1	M0QZM1	M0QZM1_HUMAN	HNRNPM	Isoform of P52272, Heterogeneous nuclear ribonucleoprotein M (Fragment)
23.612	19.5192	P62487	H0YEE4;E9PIU7;E9PKH3;P62487	RPB7_HUMAN	POLR2G	DNA-directed RNA polymerase II subunit RPB7
23.6131	20.2389	Q9ULJ6	Q9ULJ6	ZMIZ1_HUMAN	ZMIZ1	Zinc finger MIZ domain-containing protein 1
23.6157	19.5735	O75448;O75448-2	B9TX62;O75448-2;A0A0B4J1W0;F5GY88;O75448	MED24_HUMAN	MED24	Mediator of RNA polymerase II transcription subunit 24
23.616	23.6075	Q2KHT3;Q2KHT3-2	A0A8V8TR67;Q2KHT3-2;Q2KHT3	CL16A_HUMAN	CLEC16A	Protein CLEC16A
23.6168	22.4649	Q5VT06	H0YD38;Q5T2X4;A0A994J5T9;Q5VT06	CE350_HUMAN	CEP350	Centrosome-associated protein 350
23.6203	22.2616	Q9Y605	Q9Y605	MOFA1_HUMAN	MRFAP1	MORF4 family-associated protein 1
23.622	25.3389	P06753	A0A2R8Y5V9;P06753-6;A0A2R8YHD2;A0A494C034;A0A2R2Y2Q3;P06753	TPM3_HUMAN	TPM3	Tropomyosin alpha-3 chain
23.6223	NaN	C4AMC7;Q6VEQ5	A0A8Q3SIH9;C4AMC7;A8K0Z3;Q6VEQ5	WASH2_HUMAN;WASH3_HUMAN	WASH2P;WASH3P	Putative WAS protein family homolog 3
23.6254	22.6092	P60673	P60673	PROF3_HUMAN	PFN3	Profilin-3
23.6255	20.5467	Q99447;Q99447-3	I3L3V9;I3L1L9;Q99447-2;Q99447-3;Q99447-4;Q99447	PCY2_HUMAN	PCYT2	Ethanolamine-phosphate cytidylyltransferase
23.6282	22.887	Q8IWV7	Q8IWV7	UBR1_HUMAN	UBR1	E3 ubiquitin-protein ligase UBR1
23.6285	NaN	Q9Y383	Q9Y383-2;Q9Y383-3;Q96HJ9-2;A0A0A6YYJ8;Q9Y383	LC7L2_HUMAN	LUC7L2	Putative RNA-binding protein Luc7-like 2
23.63	21.3043	P05026;P05026-2	B7Z9S8;P05026-2;A0A8I5KNT2;P05026	AT1B1_HUMAN	ATP1B1	Sodium/potassium-transporting ATPase subunit beta-1
23.6303	NaN	Q9P2W1	Q9P2W1-2;K7EK12;K7ELD8;K7EQS1;Q9P2W1	HOP2_HUMAN	PSMC3IP	Homologous-pairing protein 2 homolog
23.6324	20.8061	Q709C8;Q709C8-3	Q709C8-2;Q709C8-3;Q709C8-4;Q709C8	VP13C_HUMAN	VPS13C	Intermembrane lipid transfer protein VPS13C
23.6361	22.8737	Q3KQU3;Q3KQU3-2;Q3KQU3-4	D3DPS3;Q3KQU3-2;Q3KQU3-3;Q3KQU3-4;Q3KQU3	MA7D1_HUMAN	MAP7D1	MAP7 domain-containing protein 1
23.6382	19.4898	Q14192	Q14192	FHL2_HUMAN	FHL2	Four and a half LIM domains protein 2
23.639	21.6045	Q7L5D6	Q7L5D6-2;C9JY46;C9JPA8;C9JHN8;Q7L5D6	GET4_HUMAN	GET4	Golgi to ER traffic protein 4 homolog
23.6395	22.9184	Q9NQP4	E9PQY2;Q9NQP4	PFD4_HUMAN	PFDN4	Prefoldin subunit 4
23.6404	NaN	A0A2R8YE82	C9J6G3;C9J7M1;A0A2R8Y7P7;A0A2R8YE82;O95749	A0A2R8YE82_HUMAN	TBCE	Isoform of Q15813, Tubulin folding cofactor E
23.6425	21.4283	Q6PJ69	H0YGS7;H0YG27;Q6PJ69	TRI65_HUMAN	TRIM65	E3 ubiquitin-protein ligase TRIM65
23.6436	20.913	Q14746;Q14746-2	Q14746-2;B7Z2Y2;Q14746	COG2_HUMAN	COG2	Conserved oligomeric Golgi complex subunit 2
23.6457	22.6723	Q9Y5Y0	Q9Y5Y0	FLVC1_HUMAN	FLVCR1	Heme transporter FLVCR1
23.6474	22.2894	Q96NU1;Q96NU1-4;Q96NU1-5;Q96NU1-6	Q96NU1-4;Q96NU1-5;Q96NU1-6;H7BY14;A0A087X223;A0A087X1J5;A0A087WU74;A0A087WX24;A0A087WXB3;A0A087WYU3;A0A087WYW1;Q96NU1	SAM11_HUMAN	SAMD11	Sterile alpha motif domain-containing protein 11
23.6518	20.2906	Q14966	Q14966-3;Q14966-5;Q14966	ZN638_HUMAN	ZNF638	Zinc finger protein 638
23.6551	20.8197	Q96EY8	S4R3P5;Q96EY8	MMAB_HUMAN	MMAB	Corrinoid adenosyltransferase MMAB
23.656	19.94	Q9Y5Q9	H7C0C0;A0A494C1S7;Q9Y5Q9	TF3C3_HUMAN	GTF3C3	General transcription factor 3C polypeptide 3
23.6603	19.2738	Q9C0B7	Q9C0B7	TNG6_HUMAN	TANGO6	Transport and Golgi organization protein 6 homolog
23.6607	21.0571	Q96B01;Q96B01-2	Q96B01-2;Q96B01-3;Q96B01	R51A1_HUMAN	RAD51AP1	RAD51-associated protein 1
23.6613	21.5717	Q96GQ7	B7Z6D5;Q96GQ7	DDX27_HUMAN	DDX27	Probable ATP-dependent RNA helicase DDX27
23.6619	21.6249	Q96QC0	Q96QC0	PP1RA_HUMAN	PPP1R10	Serine/threonine-protein phosphatase 1 regulatory subunit 10
23.662	20.6284	P16220;P16220-1	E9PAR2;P18846-2;Q03060-6;Q03060-8;Q03060-9;Q03060-21;Q03060-23;Q03060-24;Q03060-26;Q03060-31;Q03060-32;G5E998;P16220-1;P16220-3;P18846;P16220	CREB1_HUMAN	CREB1	Cyclic AMP-responsive element-binding protein 1
23.6669	21.193	P78316;P78316-2	E9PFK5;P78316-2;P78316	NOP14_HUMAN	NOP14	Nucleolar protein 14
23.6671	21.4054	Q9NVN8	A0A6I8PL80;A0A6I8PS19;Q9NVN8	GNL3L_HUMAN	GNL3L	Guanine nucleotide-binding protein-like 3-like protein
23.6694	22.0599	Q9UKT5;Q9UKT5-2	Q9UKT5-2;D6REP2;D6RAU6;D6RAJ6;Q9UKT5	FBX4_HUMAN	FBXO4	F-box only protein 4
23.671	22.1039	P11274;P11274-2	H0Y554;P11274-2;P11274	BCR_HUMAN	BCR	Breakpoint cluster region protein
23.6719	18.0595	O75191	O75191-2;A0A3B3IRM4;O75191	XYLB_HUMAN	XYLB	Xylulose kinase
23.6726	23.3021	P22694	P22694-10;P22694-2;P22694-3;P22694-4;P22694-5;P22694-6;P22694-7;P22694-9;A0A087WVC4;P22694	KAPCB_HUMAN	PRKACB	cAMP-dependent protein kinase catalytic subunit beta
23.6762	21.7394	Q06547;Q06547-2	H9ZYI9;Q06547-2;Q06547-3;Q06547-4;F5H7I4;Q06547	GABP1_HUMAN	GABPB1	GA-binding protein subunit beta-1
23.6792	19.9856	Q9NZN5	Q9NZN5-2;E9PMR6;Q9NZN5	ARHGC_HUMAN	ARHGEF12	Rho guanine nucleotide exchange factor 12
23.6843	20.3657	O43805	A0A087WV26;O43805	SSNA1_HUMAN	SSNA1	Microtubule nucleation factor SSNA1
23.6889	22.9122	Q9UKV8	Q5TA58;Q9UKV8-2;A0A6I8PTZ8;A0A8V8TNY0;Q9H9G7-2;Q9UL18;Q9UKV8;Q9H9G7	AGO2_HUMAN	AGO2	Protein argonaute-2
23.689	20.1098	P11233	C9J6B1;F8WEQ6;C9JYR1;C9JPE8;C9JQB3;H7C3P7;P11234-2;P11234-3;P11234;P11233	RALA_HUMAN	RALA	Ras-related protein Ral-A
23.6898	19.0192	Q13888;Q6P1K8	D6RJD3;D6RIT7;D6RID8;D6RGC9;D6RAW1;R4GMV2;Q13888;Q6P1K8	T2H2L_HUMAN;TF2H2_HUMAN	GTF2H2;GTF2H2C_2	General transcription factor IIH subunit 2
23.6903	20.233	Q9H2D6;Q9H2D6-2;Q9H2D6-3;Q9H2D6-5;Q9H2D6-7	H0Y5J9;F6WYE2;Q9H2D6-2;Q9H2D6-3;Q9H2D6-5;Q9H2D6-6;Q9H2D6-7;F6TR96;Q9H2D6	TARA_HUMAN	TRIOBP	TRIO and F-actin-binding protein
23.6908	21.7727	Q9H0H5	Q9H0H5	RGAP1_HUMAN	RACGAP1	Rac GTPase-activating protein 1
23.6912	20.3226	O00622	O00622	CCN1_HUMAN	CCN1	CCN family member 1
23.6918	21.0073	Q8WVT3	H7C2F7;Q8WVT3	TPC12_HUMAN	TRAPPC12	Trafficking protein particle complex subunit 12
23.6934	22.4997	P41223	C9JCD9;P41223	BUD31_HUMAN	BUD31	Protein BUD31 homolog
23.6948	20.7542	Q9UJ41;Q9UJ41-3;Q9UJ41-4	Q9UJ41-3;Q9UJ41-4;E9PFK9;Q9UJ41	RABX5_HUMAN	RABGEF1	Rab5 GDP/GTP exchange factor
23.6949	22.1782	P0CAP2	P0CAP2-3;H8Y6P7;P0CAP2	GRL1A_HUMAN	POLR2M	DNA-directed RNA polymerase II subunit GRINL1A
23.695	20.1592	Q9BQP7	Q5QPE7;Q5QPE8;Q9BQP7	MGME1_HUMAN	MGME1	Mitochondrial genome maintenance exonuclease 1
23.6953	26.2207	P18031	B4DSN5;P18031	PTN1_HUMAN	PTPN1	Tyrosine-protein phosphatase non-receptor type 1
23.7017	21.2444	Q5T447	Q5T447	HECD3_HUMAN	HECTD3	E3 ubiquitin-protein ligase HECTD3
23.7028	NaN	O60936;O60936-1;O60936-3	H3BUN4;H3BUP2;H3BM67;O60936-1;O60936-3;O60936	NOL3_HUMAN	NOL3	Nucleolar protein 3
23.703	23.6556	Q86XZ4	F8VXB3;F8VS10;Q86XZ4	SPAS2_HUMAN	SPATS2	Spermatogenesis-associated serine-rich protein 2
23.7032	19.9665	Q8N954	A0A6I8PRS5;Q8N954	GPT11_HUMAN	GPATCH11	G patch domain-containing protein 11
23.7055	21.0961	Q9H0E9-2;Q9H0E9-3;Q9H0E9-4	B5MCW3;H7C127;H7C128;H7C179;Q9H0E9-2;Q9H0E9-3;Q9H0E9-4;Q9H0E9	BRD8_HUMAN	BRD8	Isoform of Q9H0E9, Isoform 2 of Bromodomain-containing protein 8
23.7077	21.7814	O95260-2	A0A8I5QJC4;A0A8I5QKV3;A0A8I5QKM5;F8WAC9;O95260-2;A0A8I5KNT9;A0A8I5KNV5;A0A8I5KQ75;A0A8I5KS65;A0A8I5KSC8;A0A8I5KQS6;A0A8I5KT53;A0A8I5KTH0;A0A8I5KWA6;A0A8I5KWU7;A0A8I5KWF1;A0A8I5KVR2;A0A8I5KW01;A0A8I5KVF5;A0A8I5KZ10;A0A8I5KZ24;A0A8I5KZ28;A0A8I5KXF6;A0A8I5KYL1;A0A8I5KX91;A0A8I5KXC6;A0A8I5KXU0;F5GXE4;O95260	ATE1_HUMAN	ATE1	Isoform of O95260, Isoform ATE1-2 of Arginyl-tRNA--protein transferase 1
23.7093	20.6161	Q07617	Q07617-2;Q07617	SPAG1_HUMAN	SPAG1	Sperm-associated antigen 1
23.7099	18.0473	A8MPP1;Q96FC9-2;Q96FC9-3;Q96FC9-4	Q96FC9-2;Q96FC9-3;Q96FC9-4;A8MPP1;Q96FC9	D11L8_HUMAN;DDX11_HUMAN	DDX11;DDX11L8	Putative ATP-dependent RNA helicase DDX11-like protein 8
23.7101	20.186	Q6P2P2	Q6P2P2-2;Q6P2P2	ANM9_HUMAN	PRMT9	Protein arginine N-methyltransferase 9
23.7114	21.6947	A0A804HKE7;E7EVA0	E7EVA0;A0A804HKE7	A0A804HKE7_HUMAN;E7EVA0_HUMAN	MAP4	Isoform of P27816, Microtubule-associated protein
23.7166	21.4655	Q86WB0	C9J0I9;Q86WB0-2;Q86WB0	ZC3C1_HUMAN	ZC3HC1	Zinc finger C3HC-type protein 1
23.7174	NaN	A0A0C4DG89	A0A0C4DG89	A0A0C4DG89_HUMAN	DDX46	Isoform of Q7L014, RNA helicase
23.7207	21.6947	Q9Y2H0;Q9Y2H0-1;Q9Y2H0-3	F8WF49;A0A0B4J2C2;Q9Y2H0-1;Q9Y2H0-3;Q9Y2H0	DLGP4_HUMAN	DLGAP4	Disks large-associated protein 4
23.7214	24.5611	Q16629;Q16629-2;Q16629-3;Q16629-4	Q16629-2;Q16629-3;Q16629-4;C9JAB2;A0A0B4J1Z1;Q16629	SRSF7_HUMAN	SRSF7	Serine/arginine-rich splicing factor 7
23.7234	23.1398	Q8WUD4	J3KR35;C9JUN5;Q8WUD4	CCD12_HUMAN	CCDC12	Coiled-coil domain-containing protein 12
23.7236	21.4348	P16298;P16298-3;P16298-4	P16298-2;P16298-3;P16298-4;Q5F2F8;P16298	PP2BB_HUMAN	PPP3CB	Serine/threonine-protein phosphatase 2B catalytic subunit beta isoform
23.7244	20.9228	O60504;O60504-2	H0YB51;E5RIA0;E5RJP2;O60504-2;O60504	VINEX_HUMAN	SORBS3	Vinexin
23.7304	25.2359	P32754;P32754-2	P32754-2;A0A0B4J1R4;P32754	HPPD_HUMAN	HPD	4-hydroxyphenylpyruvate dioxygenase
23.7352	22.8359	Q8N3F8	B0QY86;B0QY91;A0A7P0T9P2;A0A7P0T8A6;H0Y6J8;A0A7P0Z4L3;Q8N3F8	MILK1_HUMAN	MICALL1	MICAL-like protein 1
23.7368	NaN	Q9H6Y2	D6RGJ8;Q9H6Y2	WDR55_HUMAN	WDR55	WD repeat-containing protein 55
23.7374	21.0184	O75380	O75380	NDUS6_HUMAN	NDUFS6	NADH dehydrogenase [ubiquinone] iron-sulfur protein 6, mitochondrial
23.7377	20.2992	Q9NWZ5;Q9NWZ5-4	Q9NWZ5-4;Q5JWV1;Q9NWZ5	UCKL1_HUMAN	UCKL1	Uridine-cytidine kinase-like 1
23.742	19.4844	P13716;P13716-2	P13716-2;P13716	HEM2_HUMAN	ALAD	Delta-aminolevulinic acid dehydratase
23.7426	21.4366	Q99784;Q99784-3;Q99784-5	F5H810;Q99784-3;Q99784-5;Q99784	NOE1_HUMAN	OLFM1	Noelin
23.7445	21.2893	Q15742;Q15742-3	Q15742-3;Q15742	NAB2_HUMAN	NAB2	NGFI-A-binding protein 2
23.7457	NaN	Q9Y4Z0	V9GZ56;U3KQK1;Q9Y4Z0	LSM4_HUMAN	LSM4	U6 snRNA-associated Sm-like protein LSm4
23.7476	20.9604	Q01804	Q01804-3;Q01804-5;Q01804	OTUD4_HUMAN	OTUD4	OTU domain-containing protein 4
23.7482	18.9558	Q9NQE9	Q9NQE9	HINT3_HUMAN	HINT3	Adenosine 5'-monophosphoramidase HINT3
23.7483	23.316	Q15651	A0A994J3W4;A0A087WZE9;Q15651	HMGN3_HUMAN	HMGN3	High mobility group nucleosome-binding domain-containing protein 3
23.7491	21.3747	Q58FG1	Q58FG1	HS904_HUMAN	HSP90AA4P	Putative heat shock protein HSP 90-alpha A4
23.7501	20.8464	Q9Y4B6;Q9Y4B6-2	Q9Y4B6-2;Q9Y4B6-3;Q9Y4B6	DCAF1_HUMAN	DCAF1	DDB1- and CUL4-associated factor 1
23.7536	20.956	P22670	P22670	RFX1_HUMAN	RFX1	MHC class II regulatory factor RFX1
23.7539	22.2644	Q9Y3B3	Q9Y3B3	TMED7_HUMAN	TMED7	Transmembrane emp24 domain-containing protein 7
23.7585	NaN	Q9P2D7;Q9P2D7-3;Q9P2D7-6;Q9P2D7-8	Q9P2D7-6;Q9P2D7-3;Q9P2D7-8;Q9P2D7	DYH1_HUMAN	DNAH1	Dynein axonemal heavy chain 1
23.7628	20.1305	Q49AR2	Q49AR2-2;Q49AR2-3;Q49AR2	CE022_HUMAN	C5orf22	UPF0489 protein C5orf22
23.7629	19.6347	Q13112	Q13112	CAF1B_HUMAN	CHAF1B	Chromatin assembly factor 1 subunit B
23.7636	19.4287	Q709F0;Q709F0-2	F8WEV0;D6RDI8;Q709F0-2;A0A0J9YXS1;Q709F0	ACD11_HUMAN	ACAD11	Acyl-CoA dehydrogenase family member 11
23.764	21.4353	Q9Y277;Q9Y277-2	Q9Y277-2;Q9Y277	VDAC3_HUMAN	VDAC3	Voltage-dependent anion-selective channel protein 3
23.7645	20.0762	Q02218	Q02218-2;E9PFG7;E9PCR7;E9PDF2;Q02218	ODO1_HUMAN	OGDH	2-oxoglutarate dehydrogenase complex component E1
23.7668	20.1134	Q8IY22	Q8IY22-2;Q8IY22-3;A0A087WU05;Q8IY22	CMIP_HUMAN	CMIP	C-Maf-inducing protein
23.7675	20.0685	Q9Y485	F5H269;Q9Y485	DMXL1_HUMAN	DMXL1	DmX-like protein 1
23.7677	20.8464	Q8N0Z6	Q8N0Z6	TTC5_HUMAN	TTC5	Tetratricopeptide repeat protein 5
23.7682	20.3255	O94782	C9JC88;O94782	UBP1_HUMAN	USP1	Ubiquitin carboxyl-terminal hydrolase 1
23.7692	20.7111	Q8WUB8;Q8WUB8-2	Q8WUB8-2;Q8WUB8-3;S5FZ81;Q8WUB8	PHF10_HUMAN	PHF10	PHD finger protein 10
23.7697	20.7174	Q8N4Q1-2	Q8N4Q1-2;Q8N4Q1	MIA40_HUMAN	CHCHD4	Isoform of Q8N4Q1, Isoform 2 of Mitochondrial intermembrane space import and assembly protein 40
23.7714	21.3644	Q9BQ70	H3BTU3;H3BSP8;H3BS87;H3BMJ8;Q9H7D3;Q9BQ70	TCF25_HUMAN	TCF25	Ribosome quality control complex subunit TCF25
23.7724	23.1206	Q8IVM0;Q8IVM0-2	Q8IVM0-2;Q8IVM0	CCD50_HUMAN	CCDC50	Coiled-coil domain-containing protein 50
23.773	21.2679	P32121;P32121-3;P32121-4	P32121-2;P32121-3;P32121-4;P32121-5;Q68DZ5;K7EL17;P32121	ARRB2_HUMAN	ARRB2	Beta-arrestin-2
23.773	17.7925	Q16850	A0A8I5KRT9;A0A8I5KWQ7;Q16850	CP51A_HUMAN	CYP51A1	Lanosterol 14-alpha demethylase
23.776	23.9996	Q7Z422;Q7Z422-5	Q7Z422-2;Q7Z422-3;Q7Z422-4;Q7Z422-5;Q7Z422	SZRD1_HUMAN	SZRD1	SUZ domain-containing protein 1
23.776	21.175	Q9Y5T5;Q9Y5T5-2;Q9Y5T5-3	Q9Y5T5-2;Q9Y5T5-3;Q9Y5T5-4;Q9Y5T5	UBP16_HUMAN	USP16	Ubiquitin carboxyl-terminal hydrolase 16
23.7785	22.1915	Q7Z7C8;Q7Z7C8-2;Q7Z7C8-4	A0A8I5QJI2;A0A8I5QL44;Q7Z7C8-2;Q7Z7C8-4;A0A0A0MRR3;A0A8I5KVM3;A0A8I5KXI2;Q7Z7C8	TAF8_HUMAN	TAF8	Transcription initiation factor TFIID subunit 8
23.7786	17.4964	Q7Z7K0	C9JES7;Q7Z7K0	COXM1_HUMAN	CMC1	COX assembly mitochondrial protein homolog
23.7795	21.655	Q9UJF2-2	H0Y638;Q9UJF2-2;A0A8Q3SJF6;A0A8Q3SIU1;Q9UJF2	NGAP_HUMAN	RASAL2	Isoform of Q9UJF2, Isoform 2 of Ras GTPase-activating protein nGAP
23.7809	20.6303	Q9H7E9;Q9H7E9-2	Q9H7E9-2;A0A3B3IRR6;A0A3B3ITA3;A0A3B3IT54;Q9H7E9	CH033_HUMAN	C8orf33	UPF0488 protein C8orf33
23.7819	20.9701	P49356	P49356-2;B4DL54;P49356	FNTB_HUMAN	FNTB	Protein farnesyltransferase subunit beta
23.7844	22.3236	O14662;O14662-2;O14662-4;O14662-5;O14662-6	B7ZBM4;B7ZBM5;B7ZBM8;H0YEW0;F8W9Z6;O14662-2;O14662-3;O14662-4;O14662-5;O14662-6;Q96NX8;E9PND6;H3BU86;O14662	STX16_HUMAN	STX16	Syntaxin-16
23.7861	21.7252	Q9BRT3	J3KTI2;Q9BRT3	MIEN1_HUMAN	MIEN1	Migration and invasion enhancer 1
23.7888	20.2841	P29692-4	P29692-4;E9PK06	EF1D_HUMAN	EEF1D	Isoform of P29692, Isoform 4 of Elongation factor 1-delta
23.7892	18.7631	P53778;P53778-2	P53778-2;B5MDL5;P53778	MK12_HUMAN	MAPK12	Mitogen-activated protein kinase 12
23.7904	20.1427	O60333-3	O60333-3	KIF1B_HUMAN	KIF1B	Isoform of O60333, Isoform 3 of Kinesin-like protein KIF1B
23.7906	20.7209	Q70UQ0-4	Q70UQ0-4	IKIP_HUMAN	IKBIP	Isoform of Q70UQ0, Isoform 4 of Inhibitor of nuclear factor kappa-B kinase-interacting protein
23.7922	19.943	Q6ZS30;Q6ZS30-1	A0A804HJ72;H7BZA0;A0A804HKS6;Q6ZS30-1;Q6ZS30	NBEL1_HUMAN	NBEAL1	Neurobeachin-like protein 1
23.7968	22.3295	A9UHW6	J3KSB8;J3QLJ5;J3QLD1;J3QRZ6;A9UHW6	MI4GD_HUMAN	MIF4GD	MIF4G domain-containing protein
23.8008	21.9837	Q9Y4W2;Q9Y4W2-2	Q9Y4W2-2;Q9Y4W2-3;Q9Y4W2-4;A0A7I2YQI7;A0A7I2V3Q3;A0A7I2V3R6;A0A7I2V4E5;A0A7I2V5R7;A0A7I2V653;Q9Y4W2	LAS1L_HUMAN	LAS1L	Ribosomal biogenesis protein LAS1L
23.803	19.9786	Q9UL63;Q9UL63-2	C9J7E8;Q9UL63-2;Q9UL63	MKLN1_HUMAN	MKLN1	Muskelin
23.8043	18.7915	Q9H1I8	B1AH59;Q9H1I8-3;F2Z2W4;Q9H1I8	ASCC2_HUMAN	ASCC2	Activating signal cointegrator 1 complex subunit 2
23.8045	23.3182	P48426	H7BXS3;P48426-2;P48426;P78356	PI42A_HUMAN	PIP4K2A	Phosphatidylinositol 5-phosphate 4-kinase type-2 alpha
23.8065	22.1309	Q6UVJ0	Q6UVJ0	SAS6_HUMAN	SASS6	Spindle assembly abnormal protein 6 homolog
23.8087	21.2512	Q14118	Q14118	DAG1_HUMAN	DAG1	Dystroglycan 1
23.8093	21.1681	Q9H0A0;Q9H0A0-2	Q9H0A0-2;Q9H0A0	NAT10_HUMAN	NAT10	RNA cytidine acetyltransferase
23.8096	20.161	P61964	P61964	WDR5_HUMAN	WDR5	WD repeat-containing protein 5
23.8147	20.7156	Q9H7E2-3	Q9H7E2-2;Q9H7E2-3;Q9H7E2	TDRD3_HUMAN	TDRD3	Isoform of Q9H7E2, Isoform 3 of Tudor domain-containing protein 3
23.8182	21.8805	Q8IVL6;Q8IVL6-2	Q8IVL6-2;Q8IVL6	P3H3_HUMAN	P3H3	Prolyl 3-hydroxylase 3
23.8187	22.7497	Q9H4L7-2	D6RAY8;Q9H4L7-2;Q9H4L7	SMRCD_HUMAN	SMARCAD1	Isoform of Q9H4L7, Isoform 2 of SWI/SNF-related matrix-associated actin-dependent regulator of chromatin subfamily A containing DEAD/H box 1
23.8191	19.2424	Q8IZT6	A0A7P0T8U9;A0A7P0Z4R7;A0A7P0Z491;Q8IZT6-2;Q8IZT6	ASPM_HUMAN	ASPM	Abnormal spindle-like microcephaly-associated protein
23.8239	21.91	Q8IWJ2	A0A8I5QJB7;B8ZZW2;A0A8I5KVA2;A0A8I5KW38;Q8IWJ2	GCC2_HUMAN	GCC2	GRIP and coiled-coil domain-containing protein 2
23.8265	21.3198	Q9P215	Q9P215	POGK_HUMAN	POGK	Pogo transposable element with KRAB domain
23.8266	21.2414	Q9BQS8;Q9BQS8-4	Q9BQS8-4;Q9BQS8	FYCO1_HUMAN	FYCO1	FYVE and coiled-coil domain-containing protein 1
23.831	20.1389	P07996	P07996-2;P07996	TSP1_HUMAN	THBS1	Thrombospondin-1
23.8316	21.0453	P49917	A0A0C4DGV9;P49917	DNLI4_HUMAN	LIG4	DNA ligase 4
23.8354	19.5821	Q9NXF7	Q9NXF7	DCA16_HUMAN	DCAF16	DDB1- and CUL4-associated factor 16
23.8368	18.9357	Q13356	A0A7P0T8E8;A0A7P0TAH4;A0A7P0TB19;A0A7P0TA15;Q13356-2;A0A7P0Z4K4;Q13356	PPIL2_HUMAN	PPIL2	RING-type E3 ubiquitin-protein ligase PPIL2
23.8391	22.2616	Q8NCE0;Q8NCE0-2	C9J7Z4;Q8NCE0-2;Q8NCE0-3;Q8NCE0-4;Q8NCE0-5;A0A7P0T9K6;A0A7P0T9Y6;A0A7P0T8I7;A0A7P0T8F8;A0A7P0T8K4;A0A7P0T914;A0A7P0T923;A0A7P0T8S9;A0A7P0T8W9;A0A7P0T8Z6;A0A7P0T841;A0A7P0TBE6;A0A7P0TA86;H7C2Z3;H7C301;A0A7P0Z4J6;A0A7P0Z492;Q8NCE0	SEN2_HUMAN	TSEN2	tRNA-splicing endonuclease subunit Sen2
23.8417	22.5748	Q13227;Q13227-2	Q13227-2;I3L4X7;I3L3Y9;Q13227	GPS2_HUMAN	GPS2	G protein pathway suppressor 2
23.8421	20.9983	P61009	P61009	SPCS3_HUMAN	SPCS3	Signal peptidase complex subunit 3
23.8423	21.3291	Q9UPN9	H0Y612;Q9UPN9-2;Q9UPN9	TRI33_HUMAN	TRIM33	E3 ubiquitin-protein ligase TRIM33
23.8425	22.8459	Q9NQS1	Q9NQS1	AVEN_HUMAN	AVEN	Cell death regulator Aven
23.8427	21.578	Q02241	A0A2U3TZL8;H7BYN4;Q02241-2;Q02241-3;A0A7I2V5Y5;Q02241	KIF23_HUMAN	KIF23	Kinesin-like protein KIF23
23.8429	20.9367	Q96MG8;Q96MG8-2	Q96MG8-2;Q96MG8	PCMD1_HUMAN	PCMTD1	Protein-L-isoaspartate O-methyltransferase domain-containing protein 1
23.8443	NaN	Q9H2C0	Q9H2C0	GAN_HUMAN	GAN	Gigaxonin
23.8458	20.7084	Q9UNH6;Q9UNH6-3	Q9UNH6-2;Q9UNH6-3;E9PNL2;Q9UNH6	SNX7_HUMAN	SNX7	Sorting nexin-7
23.852	21.2374	Q9UPZ3;Q9UPZ3-2	Q9UPZ3-2;Q9UPZ3	HPS5_HUMAN	HPS5	BLOC-2 complex member HPS5
23.8522	23.5545	P83916	J3KS05;B5MD17;P83916	CBX1_HUMAN	CBX1	Chromobox protein homolog 1
23.8523	21.0729	Q9ULM6	Q9ULM6	CNOT6_HUMAN	CNOT6	CCR4-NOT transcription complex subunit 6
23.8555	21.6369	Q9NUL3;Q9NUL3-2	E7EVJ4;E7EPX0;H0YBY0;Q9NUL3-2;Q9NUL3-3;Q9NUL3-4;Q9NUL3-6;Q9NUL3-7;Q9NUL3-8;E5RJ67;E5RJN7;Q9NUL3	STAU2_HUMAN	STAU2	Double-stranded RNA-binding protein Staufen homolog 2
23.8558	20.6694	Q8IUG5;Q8IUG5-3	Q8IUG5-2;Q8IUG5-3;Q8IUG5	MY18B_HUMAN	MYO18B	Unconventional myosin-XVIIIb
23.8562	19.6275	O95785-3;O95785-4	O95785-2;O95785-3;O95785-4;A0A2R8YFV2;M0QXA7;A0A669KBG4;A0A669KBH9;A0A669KAV7;B9EGQ5;O95785	WIZ_HUMAN	WIZ	Isoform of O95785, Isoform 3 of Protein Wiz
23.8593	21.2003	Q9UMR2	F6QDS0;H3BQK0;Q9UMR2-2;Q9UMR2-3;Q9UMR2-4;Q9NUU7-2;I3L352;I3L0H8;Q9UMR2;Q9NUU7	DD19B_HUMAN	DDX19B	ATP-dependent RNA helicase DDX19B
23.8597	21.8541	P0DPB6	P0DPB6	RPAC2_HUMAN	POLR1D	DNA-directed RNA polymerases I and III subunit RPAC2
23.8604	20.5895	Q9Y2L9;Q9Y2L9-2;Q9Y2L9-3	Q96II8-2;Q96II8-3;Q96II8-4;Q9Y2L9-2;Q9Y2L9-3;Q9Y2L9;Q96II8	LRCH1_HUMAN	LRCH1	Leucine-rich repeat and calponin homology domain-containing protein 1
23.8608	21.7237	P20248	P20248	CCNA2_HUMAN	CCNA2	Cyclin-A2
23.8632	23.8889	Q92979	A0A087WVM7;Q92979	NEP1_HUMAN	EMG1	Ribosomal RNA small subunit methyltransferase NEP1
23.8672	19.9215	O15014	O15014	ZN609_HUMAN	ZNF609	Zinc finger protein 609
23.8674	20.9357	Q86VF2-5	Q86VF2-5	IGFN1_HUMAN	IGFN1	Isoform of Q86VF2, Isoform 5 of Immunoglobulin-like and fibronectin type III domain-containing protein 1
23.8678	22.1	Q96NB3	Q96NB3	ZN830_HUMAN	ZNF830	Zinc finger protein 830
23.8679	19.99	O94811	O94811	TPPP_HUMAN	TPPP	Tubulin polymerization-promoting protein
23.868	21.2876	Q13423	A0A590UK29;A0A590UJI3;A0A590UK15;A0A590UJM2;E9PCX7;Q13423	NNTM_HUMAN	NNT	NAD(P) transhydrogenase, mitochondrial
23.8713	21.3737	Q6UXH1;Q6UXH1-2;Q6UXH1-3;Q6UXH1-4;Q6UXH1-5;Q6UXH1-6	Q6UXH1-2;Q6UXH1-3;Q6UXH1-4;Q6UXH1-5;Q6UXH1-6;A6PWM2;Q6UXH1	CREL2_HUMAN	CRELD2	Protein disulfide isomerase CRELD2
23.874	23.1711	Q9BYB4	C9JPQ6;Q9BYB4-2;Q9BYB4	GNB1L_HUMAN	GNB1L	Guanine nucleotide-binding protein subunit beta-like protein 1
23.8747	21.1744	P02774;P02774-3	D6RF35;D6RF20;D6RBJ7;P02774-3;P02774	VTDB_HUMAN	GC	Vitamin D-binding protein
23.8767	21.6978	P26374	P26374	RAE2_HUMAN	CHML	Rab proteins geranylgeranyltransferase component A 2
23.8799	23.5109	P53609	P53609-2;P53609	PGTB1_HUMAN	PGGT1B	Geranylgeranyl transferase type-1 subunit beta
23.8808	23.2091	O94822;O94822-3	O94822-3;O94822	LTN1_HUMAN	LTN1	E3 ubiquitin-protein ligase listerin
23.8836	21.2095	O75909;O75909-4	O75909-1;O75909-2;O75909-4;G3V5E1;G3V2Q3;G3V235;O75909	CCNK_HUMAN	CCNK	Cyclin-K
23.8844	16.6865	Q96RU2;Q96RU2-2;Q96RU2-3	H0YG96;B4E3L3;G3V1N5;Q96RU2-2;Q96RU2-3;A0A8V8TLZ9;Q96RU2	UBP28_HUMAN	USP28	Ubiquitin carboxyl-terminal hydrolase 28
23.8858	21.3416	Q96B23-2	K7EQH1;Q96B23-2;A0A087WVF1;Q96B23	ARK2N_HUMAN	ARK2N	Isoform of Q96B23, Isoform 2 of Protein ARK2N
23.886	21.2197	O00567	H0YDU4;H0Y653;A0A494C128;O00567	NOP56_HUMAN	NOP56	Nucleolar protein 56
23.8864	21.9928	O94830	O94830-2;O94830	DDHD2_HUMAN	DDHD2	Phospholipase DDHD2
23.8869	21.8834	O75955;O75955-2	O75955-2;A0A140T9W4;A0A140T9R1;A0A140T974;O75955	FLOT1_HUMAN	FLOT1	Flotillin-1
23.8878	19.6697	Q969T7	C9J758;Q969T7-2;Q969T7	5NT3B_HUMAN	NT5C3B	7-methylguanosine phosphate-specific 5'-nucleotidase
23.8889	20.736	Q92547	A0A2R8YD63;Q92547	TOPB1_HUMAN	TOPBP1	DNA topoisomerase 2-binding protein 1
23.8891	18.9597	Q13433	Q13433-2;K7EQ91;Q13433	S39A6_HUMAN	SLC39A6	Zinc transporter ZIP6
23.896	20.9258	Q5MIZ7-2;Q5MIZ7-3	Q5MIZ7-2;Q5MIZ7-3;Q5MIZ7-5;Q5MIZ7	P4R3B_HUMAN	PPP4R3B	Isoform of Q5MIZ7, Isoform 2 of Serine/threonine-protein phosphatase 4 regulatory subunit 3B
23.8962	20.0598	Q5T160	A0A8I5KPR3;A0A8I5KP51;A0A8I5KS21;A0A8I5KQS8;A0A8I5KWC6;A0A8I5KX97;Q5T160	SYRM_HUMAN	RARS2	Probable arginine--tRNA ligase, mitochondrial
23.8969	20.9722	P28702;P28702-3	P28702-3;A0A5F9ZHH6;P19793-2;A0A0G2JKR7;A0A0G2JHI1;P28702;P19793	RXRB_HUMAN	RXRB	Retinoic acid receptor RXR-beta
23.8983	19.1251	Q8IWL3	Q8IWL3	HSC20_HUMAN	HSCB	Iron-sulfur cluster co-chaperone protein HscB
23.9005	21.1865	Q68CP9;Q68CP9-3	Q68CP9-3;F8WCU9;Q68CP9	ARID2_HUMAN	ARID2	AT-rich interactive domain-containing protein 2
23.903	18.1591	Q9BXW6	Q9BXW6-2;Q9BXW6-4;J3QSB8;Q9BXW6	OSBL1_HUMAN	OSBPL1A	Oxysterol-binding protein-related protein 1
23.905	20.0226	Q96F63	Q96F63	CCD97_HUMAN	CCDC97	Coiled-coil domain-containing protein 97
23.905	22.058	Q5JPI9	G3V238;A0A494BZY7;Q5JPI9	EFMT2_HUMAN	EEF1AKMT2	EEF1A lysine methyltransferase 2
23.9056	22.1925	Q8NHP6	Q8NHP6-2;R4GMN1;R4GMW5;Q8NHP6	MSPD2_HUMAN	MOSPD2	Motile sperm domain-containing protein 2
23.9064	20.5577	P46019	P46019	KPB2_HUMAN	PHKA2	Phosphorylase b kinase regulatory subunit alpha, liver isoform
23.9069	20.7235	Q9BTD8	K7EML2;K7EQ03;K7EP90;K7ER08;Q9BTD8-2;Q9BTD8-3;Q9BTD8-4;Q9BTD8	RBM42_HUMAN	RBM42	RNA-binding protein 42
23.9086	20.6715	O00468;O00468-3;O00468-4;O00468-5;O00468-6;O00468-7	O00468-2;O00468-3;O00468-4;O00468-5;O00468-6;O00468-7;A0A494C1I6;A0A494C0G5;A0A087X208;O00468	AGRIN_HUMAN	AGRN	Agrin
23.9098	19.8694	Q12841;Q12841-2	Q12841-2;Q12841	FSTL1_HUMAN	FSTL1	Follistatin-related protein 1
23.9099	21.1148	Q9P0J7	C9J3I2;Q9P0J7	KCMF1_HUMAN	KCMF1	E3 ubiquitin-protein ligase KCMF1
23.9107	21.2248	Q8N9B5;Q8N9B5-2	Q8N9B5-2;Q8N9B5	JMY_HUMAN	JMY	Junction-mediating and -regulatory protein
23.9109	22.2274	Q13362-2	H0YNR8;H0YK25;G3V5T2;G3V2U3;Q96B13;Q13362-2;Q13362-3;Q13362	2A5G_HUMAN	PPP2R5C	Isoform of Q13362, Isoform Gamma-1 of Serine/threonine-protein phosphatase 2A 56 kDa regulatory subunit gamma isoform
23.911	22.1466	P82094	P82094-2;A0A2R8Y7M0;F8WF45;P82094	TMF1_HUMAN	TMF1	TATA element modulatory factor
23.9111	20.3855	P55011;P55011-3	P55011-3;G3XAL9;P55011	S12A2_HUMAN	SLC12A2	Solute carrier family 12 member 2
23.9112	23.2541	Q96NT1	Q96NT1	NP1L5_HUMAN	NAP1L5	Nucleosome assembly protein 1-like 5
23.9133	21.7972	O14908	O14908-2;K7EM11;O14908	GIPC1_HUMAN	GIPC1	PDZ domain-containing protein GIPC1
23.9142	17.9305	Q99653	Q99653	CHP1_HUMAN	CHP1	Calcineurin B homologous protein 1
23.9143	22.4872	F8W726;Q5VU77	F8W726;Q5VU77	F8W726_HUMAN;Q5VU77_HUMAN	UBAP2L	Isoform of Q14157, Ubiquitin associated protein 2 like
23.9147	22.5698	O43815	O43815-2;O43815	STRN_HUMAN	STRN	Striatin
23.9163	21.3185	Q6NZY4	Q6NZY4	ZCHC8_HUMAN	ZCCHC8	Zinc finger CCHC domain-containing protein 8
23.9235	20.9736	P29083	P29083	T2EA_HUMAN	GTF2E1	General transcription factor IIE subunit 1
23.9236	20.7075	P20930	P20930	FILA_HUMAN	FLG	Filaggrin
23.9244	19.855	Q96BD5;Q96BD5-2;Q96BD5-3	H0YEK2;H0YCM5;Q96BD5-2;Q96BD5-3;Q96BD5	PF21A_HUMAN	PHF21A	PHD finger protein 21A
23.9253	21.8552	Q5T7N3-2	Q5T7N3-2	KANK4_HUMAN	KANK4	Isoform of Q5T7N3, Isoform 2 of KN motif and ankyrin repeat domain-containing protein 4
23.9265	22.1416	Q9NVQ4;Q9NVQ4-2;Q9NVQ4-3	C9JDZ2;Q9NVQ4-2;Q9NVQ4-3;Q9NVQ4	FAIM1_HUMAN	FAIM	Fas apoptotic inhibitory molecule 1
23.9304	15.4033	Q96MY1	Q96MY1-2;A0A087X0N3;Q96MY1	NOL4L_HUMAN	NOL4L	Nucleolar protein 4-like
23.9306	20.5969	Q8N9N7	H3BSW0;A0A3B3ISV5;Q8N9N7	LRC57_HUMAN	LRRC57	Leucine-rich repeat-containing protein 57
23.9316	22.051	Q5JS54;Q5JS54-2	D6RB92;Q5JS54-2;Q5JS54-3;Q5JS54	PSMG4_HUMAN	PSMG4	Proteasome assembly chaperone 4
23.9319	20.1439	Q7LG56	H0YAV1;Q7LG56-5;Q7LG56-6;Q7LG56	RIR2B_HUMAN	RRM2B	Ribonucleoside-diphosphate reductase subunit M2 B
23.9373	21.5534	Q96ST3	A0A994J7C5;A0A994J7C7;Q96ST3	SIN3A_HUMAN	SIN3A	Paired amphipathic helix protein Sin3a
23.9415	20.0004	Q5VSL9	Q5VSL9-2;Q5VSL9-3;Q5VSL9	STRP1_HUMAN	STRIP1	Striatin-interacting protein 1
23.9424	19.3772	Q9UN36;Q9UN36-3	G3V5V9;G3V4S2;G3V4S9;G3V4T9;G3V552;G3V4X3;G3V5A6;G3V5B5;G3V5B7;G3V5D7;G3V5G0;G3V5G7;G3V5H8;G3V5P9;G3V5S0;G3V3P1;G3V3P6;G3V420;G3V3X2;G3V3X3;G3V2S0;G3V2T2;G3V358;G3V383;G3V2Y3;G3V392;G3V3C3;G3V3D5;G3V237;G3V239;G3V271;G3V280;G3V285;G3V2A6;G3V2I9;Q9UN36-2;Q9UN36-3;Q9UN36-4;Q9UN36-5;Q9UN36-6;Q9UN36	NDRG2_HUMAN	NDRG2	Protein NDRG2
23.9425	21.6704	Q96DH6	J3KTC1;A0A6Q8PFU8;A0A6Q8PF05;A0A6Q8PHT3;B4DHE8;J3QKT5;Q96DH6-2;Q96DH6	MSI2H_HUMAN	MSI2	RNA-binding protein Musashi homolog 2
23.9427	19.1722	P0CG29;P0CG30	Q6ICJ4;P0CG29;P0CG30	GST2_HUMAN;GSTT2_HUMAN	GSTT2;GSTT2B	Glutathione S-transferase theta-2
23.944	21.6543	P55210;P55210-3	P55210-2;P55210-3;P55210-4;Q5SVL2;A0A5F9ZHZ6;A0A0A0MRL7;P55210	CASP7_HUMAN	CASP7	Caspase-7
23.9446	19.1406	P29590;P29590-2;P29590-3;P29590-4;P29590-5;P29590-8;P29590-9	H3BUJ5;H3BT57;H3BT29;P29590-8;P29590-9;P29590-2;P29590-3;P29590-4;P29590-5;P29590-10;P29590-11;P29590-12;P29590-13;P29590-14;P29590	PML_HUMAN	PML	Protein PML
23.9447	19.8581	Q9H4Z3	Q9H4Z3	CAPAM_HUMAN	PCIF1	mRNA (2'-O-methyladenosine-N(6)-)-methyltransferase
23.9453	20.2339	O94915	A0A286YEZ9;H0Y9X0;A0A2C9F2R7;O94915	FRYL_HUMAN	FRYL	Protein furry homolog-like
23.9468	19.2154	Q8IYB8	Q8IYB8	SUV3_HUMAN	SUPV3L1	ATP-dependent RNA helicase SUPV3L1, mitochondrial
23.9494	22.5899	Q9NWZ3	Q9NWZ3-2;Q9NWZ3	IRAK4_HUMAN	IRAK4	Interleukin-1 receptor-associated kinase 4
23.9518	21.241	Q13740;Q13740-2	Q13740-2;Q13740-3;F5GXJ9;Q13740	CD166_HUMAN	ALCAM	CD166 antigen
23.9535	21.7367	O00148	A0A0D9SEM9;K7EQN7;O00148-2;O00148-3;O00148	DX39A_HUMAN	DDX39A	ATP-dependent RNA helicase DDX39A
23.9535	20.7341	Q14790;Q14790-2;Q14790-3;Q14790-4;Q14790-5;Q14790-6;Q14790-7;Q14790-8;Q14790-9	Q14790-3;Q14790-4;Q14790-5;Q14790-6;Q14790-7;Q14790-8;Q14790-9;E7EVN1;Q14790-2;E7ETB7;E7EQ01;E7EQ06;A0A8Q3WKY8;A0A8Q3SID9;A0A8Q3SI66;Q14790	CASP8_HUMAN	CASP8	Caspase-8
23.9536	21.6875	P31937	P31937	3HIDH_HUMAN	HIBADH	3-hydroxyisobutyrate dehydrogenase, mitochondrial
23.9556	21.314	P06746	E7EW18;H0YBJ0;E9PIC6;E5RIJ0;P06746	DPOLB_HUMAN	POLB	DNA polymerase beta
23.9557	21.5089	Q9BWH2	Q9BWH2	FUND2_HUMAN	FUNDC2	FUN14 domain-containing protein 2
23.9567	19.6208	Q12882	Q12882	DPYD_HUMAN	DPYD	Dihydropyrimidine dehydrogenase [NADP(+)]
23.9582	22.2237	Q7L273	K7ENB5;K7EQN1;Q7L273	KCTD9_HUMAN	KCTD9	BTB/POZ domain-containing protein KCTD9
23.9595	17.4617	Q9BW27;Q9BW27-3	J3KT10;J3QL54;J3QLD4;J3QLH0;Q9BW27-2;Q9BW27-3;F5H0W7;Q9BW27	NUP85_HUMAN	NUP85	Nuclear pore complex protein Nup85
23.9613	21.9036	Q9BZQ6-2	Q9BZQ6-2;H0Y498;A0A8J8YX80;A0A8I5KR65;A0A8I5KTR7;A0A8I5KSQ8;A0A8I5KWI4;A0A8I5KVE6;Q9BZQ6	EDEM3_HUMAN	EDEM3	Isoform of Q9BZQ6, Isoform 2 of ER degradation-enhancing alpha-mannosidase-like protein 3
23.9644	22.3102	Q9NRY2	Q9NRY2-2;Q9NRY2	SOSSC_HUMAN	INIP	SOSS complex subunit C
23.9647	21.0687	Q15208	Q15208	STK38_HUMAN	STK38	Serine/threonine-protein kinase 38
23.9647	17.7232	P14384	F8VVI6;F8W111;P14384	CBPM_HUMAN	CPM	Carboxypeptidase M
23.9658	19.1686	Q13576	Q13576-2;Q13576-3;F5H7S7;Q13576	IQGA2_HUMAN	IQGAP2	Ras GTPase-activating-like protein IQGAP2
23.967	22.0543	P61962	A0A8I5QKQ1;A0A8I5KQ63;A0A8I5KRG1;A0A8I5KTU5;A0A8I5KT41;A0A087WWI6;P61962	DCAF7_HUMAN	DCAF7	DDB1- and CUL4-associated factor 7
23.9679	19.1654	Q9NPI6;Q9NPI6-2	Q9NPI6-2;Q9NPI6	DCP1A_HUMAN	DCP1A	mRNA-decapping enzyme 1A
23.9681	19.6964	Q9BRX8;Q9BRX8-2	Q9BRX8-2;Q9BRX8	PXL2A_HUMAN	PRXL2A	Peroxiredoxin-like 2A
23.9685	20.4712	P04049;P04049-2	A0A8I5QJG5;A0A8I5QKZ6;A0A8I5QKU8;A0A0S2Z4L5;P04049-2;H7C155;A0A8I5KQ33;A0A8I5KS16;A0A8I5KSB0;A0A8I5KSI1;A0A8I5KQV4;A0A8I5KSV6;A0A8I5KT32;A0A8I5KTK4;A0A8I5KTA5;A0A8I5KW44;A0A8I5KYC4;A0A8I5KYP5;P04049	RAF1_HUMAN	RAF1	RAF proto-oncogene serine/threonine-protein kinase
23.9712	21.8963	Q96LJ7	Q96LJ7	DHRS1_HUMAN	DHRS1	Dehydrogenase/reductase SDR family member 1
23.9729	22.4284	Q9NWU2	Q9NWU2	GID8_HUMAN	GID8	Glucose-induced degradation protein 8 homolog
23.9747	23.1295	O14558	A0A1X7SC65;K7EP04;O14558	HSPB6_HUMAN	HSPB6	Heat shock protein beta-6
23.9756	20.7775	Q9H6E5	J3KN81;F8WA97;F5H0R1;H3BRB1;Q9H6E5	STPAP_HUMAN	TUT1	Speckle targeted PIP5K1A-regulated poly(A) polymerase
23.9757	17.3856	Q9H871	Q9H871-2;Q9H871	RMD5A_HUMAN	RMND5A	E3 ubiquitin-protein transferase RMND5A
23.9779	20.3203	A6NCE7;Q9GZQ8	H3BTL1;Q9H492-2;Q9GZQ8;A6NCE7;Q9H492	MLP3B_HUMAN;MP3B2_HUMAN	MAP1LC3B;MAP1LC3B2	Microtubule-associated proteins 1A/1B light chain 3 beta 2
23.9823	22.3477	P84157-2	P84157-2;P84157-3;P84157	MXRA7_HUMAN	MXRA7	Isoform of P84157, Isoform 2 of Matrix-remodeling-associated protein 7
23.9861	21.675	Q6GYQ0;Q6GYQ0-2;Q6GYQ0-5;Q6GYQ0-6;Q6GYQ0-7	H0YJB5;A0A1B0GUI1;A0A7P0TAR5;Q6GYQ0-2;Q6GYQ0-3;Q6GYQ0-4;Q6GYQ0-5;Q6GYQ0-6;Q6GYQ0-7;Q6GYQ0	RGPA1_HUMAN	RALGAPA1	Ral GTPase-activating protein subunit alpha-1
23.9876	22.809	Q9BYG3	C9J808;H7BZL0;Q9BYG3	MK67I_HUMAN	NIFK	MKI67 FHA domain-interacting nucleolar phosphoprotein
23.9877	20.5361	Q9UBB9	H0Y4U8;Q9UBB9	TFP11_HUMAN	TFIP11	Tuftelin-interacting protein 11
23.9881	22.7907	Q8N129	A0A0J9YYJ0;Q8N129	CNPY4_HUMAN	CNPY4	Protein canopy homolog 4
23.9886	21.865	Q9UKJ3;Q9UKJ3-2	Q9UKJ3-2;Q9UKJ3	GPTC8_HUMAN	GPATCH8	G patch domain-containing protein 8
23.9905	20.8676	Q8NFF5;Q8NFF5-2	Q5T196;Q8NFF5-2;Q8NFF5-3;Q8NFF5-4;Q8NFF5-5;Q8NFF5	FAD1_HUMAN	FLAD1	FAD synthase
23.9908	21.8968	Q9Y5B0	K7EJD2;A0A0J9YWB6;A0A0J9YWJ4;Q9Y5B0-4;A0A0A0MR03;Q9Y5B0	CTDP1_HUMAN	CTDP1	RNA polymerase II subunit A C-terminal domain phosphatase
23.9909	19.3739	Q96KQ7;Q96KQ7-2	A2ABF8;A2ABF9;Q96KQ7-2;A0A0G2JK64;A0A0G2JIR1;A0A0G2JIS2;Q96KQ7	EHMT2_HUMAN	EHMT2	Histone-lysine N-methyltransferase EHMT2
23.9919	23.0429	Q9P253	Q9P253	VPS18_HUMAN	VPS18	Vacuolar protein sorting-associated protein 18 homolog
23.9976	20.7842	Q56P03	G3V2W9;Q56P03	EAPP_HUMAN	EAPP	E2F-associated phosphoprotein
23.998	20.4521	Q9UBP0;Q9UBP0-3	A0A2R8Y7W6;A0A2R8Y4I8;A0A2R8YGN6;A0A2R8YCL5;A0A2R8YFW8;A0A2R8YFC9;A0A2U3TZR0;Q9UBP0-2;Q9UBP0-3;Q9UBP0-4;A0A994J6X4;Q9UBP0	SPAST_HUMAN	SPAST	Spastin
23.9989	21.8844	P23443;P23443-2;P23443-3	K7ER06;P23443-2;P23443-3;P23443-4;P23443	KS6B1_HUMAN	RPS6KB1	Ribosomal protein S6 kinase beta-1
24.0008	22.4218	Q86YP4;Q86YP4-2;Q86YP4-3	C9JVY3;C9JMI3;C9JGN4;C9JJK9;V9GY85;V9GYX5;H7C3H1;Q86YP4-3;Q86YP4-2;Q86YP4	P66A_HUMAN	GATAD2A	Transcriptional repressor p66-alpha
24.0019	21.7808	P52735-2;P52735-3	P52735-2;P52735-3;P52735	VAV2_HUMAN	VAV2	Isoform of P52735, Isoform 2 of Guanine nucleotide exchange factor VAV2
24.0028	21.4764	Q5JSZ5	Q5JSZ5-5;Q5JSZ5	PRC2B_HUMAN	PRRC2B	Protein PRRC2B
24.0037	18.4415	Q96K21;Q96K21-2	Q96K21-2;Q96K21-3;Q96K21-4;H3BRM1;H3BRF9;H3BN64;Q96K21	ANCHR_HUMAN	ZFYVE19	Abscission/NoCut checkpoint regulator
24.0042	23.2411	Q01484	A0A0U1RQN6;I6L894;D6RHE1;B7Z651;Q01484-2;Q01484-5;H0Y933;A0A5F9ZH03;A0A5F9ZH10;A0A5F9ZH17;A0A5F9ZH18;A0A5F9ZH19;A0A5F9ZGS5;A0A5F9ZGS7;A0A5F9ZH30;A0A5F9ZH34;A0A5F9ZH35;A0A5F9ZH38;A0A5F9ZH39;A0A5F9ZH58;A0A5F9ZH70;A0A5F9ZHJ6;A0A5F9ZHJ4;A0A5F9ZHL3;A0A5F9ZHL5;A0A5F9ZHL9;A0A5F9ZHM6;A0A5F9ZHN0;A0A5F9ZHN5;A0A5F9ZI08;A0A5F9ZI15;A0A5F9ZI16;A0A5F9ZI18;A0A5F9ZHQ3;A0A5F9ZHQ5;A0A5F9ZHR2;A0A5F9ZHR8;A0A5F9ZI30;A…	ANK2_HUMAN	ANK2	Ankyrin-2
24.0048	22.5153	Q8IUF1	C9J3G2;Q9BRT8-2;Q9BRT8-3;H0Y857;H0Y5V3;A0A0A0MRU4;Q5RIB0;Q5JTY5-2;A0A0A6YYH9;A0A0B4J2F1;F2Z2T4;Q8IUF1;Q5RIA9;Q9BRT8;Q4V339;Q5JTY5	ZNG1B_HUMAN	ZNG1B	Zinc-regulated GTPase metalloprotein activator 1B
24.007	21.7463	Q9NSC5;Q9NSC5-2	M0QYF9;Q9NSC5-2;Q9NSC5-5;Q9NSC5	HOME3_HUMAN	HOMER3	Homer protein homolog 3
24.0086	22.7319	Q86VN1	Q86VN1-2;A0A3B3ISW7;Q86VN1	VPS36_HUMAN	VPS36	Vacuolar protein-sorting-associated protein 36
24.012	20.073	Q9H1B7	Q9H1B7	I2BPL_HUMAN	IRF2BPL	Probable E3 ubiquitin-protein ligase IRF2BPL
24.0164	17.392	Q9Y3D2	Q9Y3D2	MSRB2_HUMAN	MSRB2	Methionine-R-sulfoxide reductase B2, mitochondrial
24.0169	19.2457	Q13395	Q13395	TARB1_HUMAN	TARBP1	Probable methyltransferase TARBP1
24.0195	17.3192	Q8IY47	Q8IY47	KBTB2_HUMAN	KBTBD2	Kelch repeat and BTB domain-containing protein 2
24.021	NaN	Q9NZQ3;Q9NZQ3-3	Q9NZQ3-2;Q9NZQ3-3;Q9NZQ3-4;Q9NZQ3-5;H7C2K2;Q9NZQ3	SPN90_HUMAN	NCKIPSD	NCK-interacting protein with SH3 domain
24.0211	21.9871	Q96JH7	Q96JH7	VCIP1_HUMAN	VCPIP1	Deubiquitinating protein VCPIP1
24.0214	19.9672	Q13368;Q13368-2	D3DX46;Q13368-2;Q13368	MPP3_HUMAN	MPP3	MAGUK p55 subfamily member 3
24.0221	21.6565	P11171;P11171-2;P11171-5	A0A2R8Y7Y3;A0A2R8YD30;A0A2U3TZH6;A0A3B3ITP0;P11171-2;P11171-3;P11171-4;P11171-5;P11171-6;P11171	EPB41_HUMAN	EPB41	Protein 4.1
24.0248	22.1698	Q9Y530	C9J5P1;C9JXC3;C9JNE2;H7C5Q1;Q9Y530	OARD1_HUMAN	OARD1	ADP-ribose glycohydrolase OARD1
24.0257	21.641	Q96GY0	H0YAP0;A0A994J7X1;A0A994J504;Q96GY0	ZC21A_HUMAN	ZC2HC1A	Zinc finger C2HC domain-containing protein 1A
24.0258	23.4187	Q9P260-2	A0A2R8Y566;Q9P260-2	RELCH_HUMAN	RELCH	Isoform of Q9P260, Isoform 2 of RAB11-binding protein RELCH
24.0266	22.0951	Q8NC60	Q8NC60	NOA1_HUMAN	NOA1	Nitric oxide-associated protein 1
24.0268	22.2834	Q14680;Q14680-2;Q14680-8	Q14680-2;Q14680-3;Q14680-4;Q14680-5;Q14680-6;Q14680-7;Q14680-8;Q14680	MELK_HUMAN	MELK	Maternal embryonic leucine zipper kinase
24.0272	20.9059	P13051	P13051-2;A0A8V8TPS1;A0A8V8TQ66;P13051	UNG_HUMAN	UNG	Uracil-DNA glycosylase
24.0272	21.7565	Q06587	Q06587	RING1_HUMAN	RING1	E3 ubiquitin-protein ligase RING1
24.0274	23.2026	Q96QR8	Q96QR8	PURB_HUMAN	PURB	Transcriptional activator protein Pur-beta
24.0284	NaN	Q9Y316;Q9Y316-3	Q9Y316-2;Q9Y316-3;Q9Y316	MEMO1_HUMAN	MEMO1	Protein MEMO1
24.0307	21.6628	Q6P6C2;Q6P6C2-1	Q6P6C2-1;Q6P6C2-3;Q6P6C2	ALKB5_HUMAN	ALKBH5	RNA demethylase ALKBH5
24.0322	18.2876	O95639;O95639-2;O95639-3	C9JEV9;O95639-2;O95639-3;O95639	CPSF4_HUMAN	CPSF4	Cleavage and polyadenylation specificity factor subunit 4
24.0323	19.5929	Q9HCC0	Q9HCC0-2;A0A804HJ24;A0A804HJ31;A0A804HJ84;A0A804HLJ9;A0A804HK37;A0A804HJC1;A0A804HJL2;A0A804HKE8;A0A804HL02;Q9HCC0	MCCB_HUMAN	MCCC2	Methylcrotonoyl-CoA carboxylase beta chain, mitochondrial
24.0338	23.962	O94808	O94808	GFPT2_HUMAN	GFPT2	Glutamine--fructose-6-phosphate aminotransferase [isomerizing] 2
24.034	19.6647	Q9UK97;Q9UK97-2;Q9UK97-3	V9GZ74;H7C4H6;Q9UK97-2;Q9UK97-3;Q9UK97	FBX9_HUMAN	FBXO9	F-box only protein 9
24.0373	NaN	A0A8I5KT99	A0A0U1RQK7;A0A8I5KT99;A0A8I5KV92	A0A8I5KT99_HUMAN	EIF4G3	Isoform of O43432, Eukaryotic translation initiation factor 4 gamma 3
24.04	20.4875	Q9NSI2;Q9NSI2-2	C9JJU7;Q9NSI2-2;Q9NSI2	SLX9_HUMAN	SLX9	Ribosome biogenesis protein SLX9 homolog
24.0427	21.3028	O94875-11	O94875-10;O94875-11;O94875-12;O94875-2;O94875-3;O94875-4;O94875-5;O94875-7;O94875-8;O94875-9;H7BXR3;H7C1R7;A0A8V8TNC1;A0A8V8TMC7;A0A8V8TMD6;A0A8Q3WLU7;A0A8Q3WKF2;A0A8Q3WKH1;A0A8Q3WKK4;O94875	SRBS2_HUMAN	SORBS2	Isoform of O94875, Isoform 11 of Sorbin and SH3 domain-containing protein 2
24.0441	22.4939	Q9NUY8;Q9NUY8-2	Q9NUY8-2;E9PGE5;Q9NUY8	TBC23_HUMAN	TBC1D23	TBC1 domain family member 23
24.0495	21.6801	O60248;O60248-2	O60248-2;O60248	SOX15_HUMAN	SOX15	Protein SOX-15
24.0501	20.1159	Q9H9C1;Q9H9C1-2	G3V4K3;Q9H9C1-2;Q9H9C1	SPE39_HUMAN	VIPAS39	Spermatogenesis-defective protein 39 homolog
24.0505	21.3492	Q9H974;Q9H974-2;Q9H974-3;Q9H974-4	Q9H974-2;Q9H974-3;Q9H974-4;Q9H974	QTRT2_HUMAN	QTRT2	Queuine tRNA-ribosyltransferase accessory subunit 2
24.0506	19.5818	Q0PNE2	C9IYN7;C9J9N8;C9J2D6;F8WE64;C9JLH5;C9JEX8;C9JA82;Q0PNE2-2;Q0PNE2	ELP6_HUMAN	ELP6	Elongator complex protein 6
24.0521	21.9741	Q9NW13	Q9NW13-2;Q9NW13	RBM28_HUMAN	RBM28	RNA-binding protein 28
24.0536	22.3413	Q9NS86	Q9NS86	LANC2_HUMAN	LANCL2	LanC-like protein 2
24.0538	22.9502	Q13685	C9JTS3;C9JG97;C9JEH3;Q13685	AAMP_HUMAN	AAMP	Angio-associated migratory cell protein
24.0541	18.708	Q9H8V3;Q9H8V3-2;Q9H8V3-3;Q9H8V3-4	Q9H8V3-2;Q9H8V3-3;Q9H8V3-4;Q9H8V3	ECT2_HUMAN	ECT2	Protein ECT2
24.0549	22.7068	Q8N6N3	Q8N6N3-2;Q8N6N3	CA052_HUMAN	C1orf52	UPF0690 protein C1orf52
24.0552	21.5819	O95819-6	E7EX83;E7ETN6;Q8N4C8-2;Q8N4C8-3;Q8N4C8-4;Q8N4C8-5;A0A0D9SEY1;O95819-2;O95819-3;O95819-4;O95819-5;O95819-6;A0A590UJE1;H7C360;G5E948;E7EN19;E7ENQ1;Q8N4C8;O95819	M4K4_HUMAN	MAP4K4	Isoform of O95819, Isoform 6 of Mitogen-activated protein kinase kinase kinase kinase 4
24.0579	22.5871	Q9BW61	Q9BW61	DDA1_HUMAN	DDA1	DET1- and DDB1-associated protein 1
24.0586	19.4886	P51946	A0A2R8YEM2;D6RG18;D6RHI7;P51946	CCNH_HUMAN	CCNH	Cyclin-H
24.0593	22.5375	Q969V6	B0QY83;B0QY84;A0A494BZX7;A0A499FIJ6;W0Z7M9;A0A8V8TPQ1;A0A087X287;A0A087WU73;Q969V6	MRTFA_HUMAN	MRTFA	Myocardin-related transcription factor A
24.0597	21.454	Q9BUH6	Q9BUH6	PAXX_HUMAN	PAXX	Protein PAXX
24.0646	NaN	Q9Y2Q9	H0YAT2;E5RK86;E5RGC7;E5RFH3;Q9Y2Q9	RT28_HUMAN	MRPS28	Small ribosomal subunit protein bS1m
24.0687	NaN	Q9UEU0	Q9UEU0	VTI1B_HUMAN	VTI1B	Vesicle transport through interaction with t-SNAREs homolog 1B
24.07	21.8463	P42330	P52895-2;B4DK69;H0Y804;A6NHU4;A0A0A0MSS8;S4R3D5;S4R3P0;S4R3Z2;P17516;P42330;Q04828;P52895	AK1C3_HUMAN	AKR1C3	Aldo-keto reductase family 1 member C3
24.0701	23.2324	Q15050	Q15050	RRS1_HUMAN	RRS1	Ribosome biogenesis regulatory protein homolog
24.0711	20.4958	Q14004-2	A0A2R8Y7W5;A0A2R8Y7Y0;A0A2R8Y4Z0;A0A2R8YCQ1;A0A2R8YD28;A0A2R8YF61;Q14004-2;Q14004	CDK13_HUMAN	CDK13	Isoform of Q14004, Isoform 2 of Cyclin-dependent kinase 13
24.0724	NaN	Q9P086	Q9P086	MED11_HUMAN	MED11	Mediator of RNA polymerase II transcription subunit 11
24.0739	21.0853	Q9BQ15	C9JT95;C9JMP5;Q9BQ15	SOSB1_HUMAN	NABP2	SOSS complex subunit B1
24.0742	23.0139	P57740	H0YG15;P57740-2;P57740-3;P57740	NU107_HUMAN	NUP107	Nuclear pore complex protein Nup107
24.0761	20.5722	P38935	A0A6Q8PFP3;A0A6Q8PGT6;A0A6Q8PGX2;A0A6Q8PEZ5;F5GX64;P38935	SMBP2_HUMAN	IGHMBP2	DNA-binding protein SMUBP-2
24.0768	21.3521	Q96EK9	A0A3B3IU88;Q96EK9	KTI12_HUMAN	KTI12	Protein KTI12 homolog
24.0817	23.4011	O15541	O15541	R113A_HUMAN	RNF113A	E3 ubiquitin-protein ligase RNF113A
24.0827	19.2753	Q96EK7	A0A0D9SEJ5;Q96EK7-2;F5GY05;Q96EK7	F120B_HUMAN	FAM120B	Constitutive coactivator of peroxisome proliferator-activated receptor gamma
24.083	NaN	Q9Y6J9	Q9Y6J9	TAF6L_HUMAN	TAF6L	TAF6-like RNA polymerase II p300/CBP-associated factor-associated factor 65 kDa subunit 6L
24.0843	19.6032	Q5W0B1	Q5W0B1	OBI1_HUMAN	OBI1	ORC ubiquitin ligase 1
24.0844	21.8689	Q8IWW6-3	Q8IWW6-2;Q8IWW6-3;Q8IWW6-4;H0Y5D8;Q1RLN5;Q8IWW6	RHG12_HUMAN	ARHGAP12	Isoform of Q8IWW6, Isoform 3 of Rho GTPase-activating protein 12
24.0874	18.1183	Q6P3X3	Q6P3X3	TTC27_HUMAN	TTC27	Tetratricopeptide repeat protein 27
24.0887	20.373	H3BVI4	H3BVI4	H3BVI4_HUMAN	LMF1	Isoform of Q96S06, Lipase maturation factor
24.0891	22.4066	Q16563-2	Q16563-2;A0A0U1RQT9;C9JYN0;A0A994J846;A0A994J5W6;A0A994J5J4;Q16563	SYPL1_HUMAN	SYPL1	Isoform of Q16563, Isoform 2 of Synaptophysin-like protein 1
24.0893	20.4579	Q53GG5-2	Q53GG5-2;A0A2U3TZH4;A0A087WYF8;Q53GG5	PDLI3_HUMAN	PDLIM3	Isoform of Q53GG5, Isoform 2 of PDZ and LIM domain protein 3
24.0913	21.946	P45880;P45880-1;P45880-2	P45880-1;P45880-2;A0A0A0MR02;P45880	VDAC2_HUMAN	VDAC2	Voltage-dependent anion-selective channel protein 2
24.0939	24.9046	P42695	E9PQA3;E9PLE0;A0A8I5KT00;P42695	CNDD3_HUMAN	NCAPD3	Condensin-2 complex subunit D3
24.0972	NaN	Q9BYG5	Q9NPB6-2;R4GMM2;Q9BYG4;Q9NPB6;Q9BYG5	PAR6B_HUMAN	PARD6B	Partitioning defective 6 homolog beta
24.0986	21.9313	Q9Y6R0	A0A0C4DGH3;Q9Y6R0	NUMBL_HUMAN	NUMBL	Numb-like protein
24.1005	22.8003	Q8IUD2	G8JLD3;A0A8J9C065;X6RM00;X6RLX0;K7EKH8;Q8IUD2-2;Q8IUD2-3;Q8IUD2-4;Q8IUD2-5;A0A8I5KS52;Q8IUD2	RB6I2_HUMAN	ERC1	ELKS/Rab6-interacting/CAST family member 1
24.1012	NaN	Q9BV38	K7EIR0;A0A0A0MQU0;U3KQC1;Q9BV38	WDR18_HUMAN	WDR18	WD repeat-containing protein 18
24.1044	20.9878	O14656	O14656	TOR1A_HUMAN	TOR1A	Torsin-1A
24.1047	21.1776	P51648;P51648-2	A0A5F9ZHI5;A0A5F9ZHN9;A0A5F9ZHP6;A0A5F9ZI12;A0A5F9ZGX4;A0A5K1VW72;J3QRD1;P51648-2;P51648	AL3A2_HUMAN	ALDH3A2	Aldehyde dehydrogenase family 3 member A2
24.1117	NaN	Q9BZG8;Q9BZG8-1;Q9BZG8-5	A0A0A0MTR4;Q9BZG8-1;Q9BZG8-5;I3L1H5;Q9BZG8	DPH1_HUMAN	DPH1	2-(3-amino-3-carboxypropyl)histidine synthase subunit 1
24.1122	22.1578	Q96CN9	Q96CN9	GCC1_HUMAN	GCC1	GRIP and coiled-coil domain-containing protein 1
24.1123	18.8024	O43924	O43924	PDE6D_HUMAN	PDE6D	Retinal rod rhodopsin-sensitive cGMP 3',5'-cyclic phosphodiesterase subunit delta
24.1138	NaN	Q9NP73	A0A096LNJ4;A0A096LNL2;A0A096LP10;A0A096LPI3;D6RE84;A0A1B0GVW6;Q9NP73-2;A0A087WTT9;A0A087WX43;Q9NP73	ALG13_HUMAN	ALG13	Putative bifunctional UDP-N-acetylglucosamine transferase and deubiquitinase ALG13
24.1165	NaN	O43708	G3V5T0;G3V4T6;G3V3B9;G3V267;A0A0A0MR33;O43708-2;O43708-3;A0A0C4DFM0;O43708	MAAI_HUMAN	GSTZ1	Maleylacetoacetate isomerase
24.1184	21.2703	Q9H0R4;Q9H0R4-2	K7EMY7;K7ER15;Q9H0R4-2;Q9H0R4	HDHD2_HUMAN	HDHD2	Haloacid dehalogenase-like hydrolase domain-containing protein 2
24.119	20.0936	Q9Y3C4	Q9Y3C4-3;Q9Y3C4	TPRKB_HUMAN	TPRKB	EKC/KEOPS complex subunit TPRKB
24.1197	21.2995	O60825;O60825-2	O60825-2;O60825	F262_HUMAN	PFKFB2	6-phosphofructo-2-kinase/fructose-2,6-bisphosphatase 2
24.1207	23.2968	O43665	O43665-1;O43665-2;O43665	RGS10_HUMAN	RGS10	Regulator of G-protein signaling 10
24.1216	22.996	Q08623;Q08623-3;Q08623-4	Q08623-2;Q08623-3;Q08623-4;A0A590UJH7;Q08623	HDHD1_HUMAN	PUDP	Pseudouridine-5'-phosphatase
24.1273	20.7501	O14717;O14717-2	O14717-2;A0A0B4J214;O14717	TRDMT_HUMAN	TRDMT1	tRNA (cytosine(38)-C(5))-methyltransferase
24.1274	22.3962	Q58WW2;Q58WW2-2;Q58WW2-3;Q58WW2-4	Q58WW2-2;Q58WW2-3;Q58WW2-4;Q58WW2	DCAF6_HUMAN	DCAF6	DDB1- and CUL4-associated factor 6
24.1298	22.2683	P49815;P49815-2;P49815-4;P49815-7	P49815-6;P49815-7;P49815-2;P49815-3;P49815-4;P49815-5;A0A2R8Y7X5;A0A2R8Y7C8;A0A2R8Y6C9;A0A2R8Y5F1;A0A2R8YGU4;A0A2R8YDZ2;A0A2R8YDR3;A0A2R8YGD6;H3BMQ0;X5D2U8;P49815	TSC2_HUMAN	TSC2	Tuberin
24.1319	20.7511	Q9HCD5	Q9HCD5	NCOA5_HUMAN	NCOA5	Nuclear receptor coactivator 5
24.1328	22.9792	Q9BQE5	B0QYK8;J3KQL8;E9PM95;Q9BQE5	APOL2_HUMAN	APOL2	Apolipoprotein L2
24.1365	22.7704	Q9UKM9;Q9UKM9-2	Q9UKM9-2;Q5QPL9;Q5QPM0;Q5QPM1;Q5QPM2;Q9UKM9	RALY_HUMAN	RALY	RNA-binding protein Raly
24.1409	21.2407	Q9UBD5;Q9UBD5-2	Q9UBD5-2;Q9UBD5-3;Q9UBD5	ORC3_HUMAN	ORC3	Origin recognition complex subunit 3
24.142	21.2596	Q96PK6	Q96PK6	RBM14_HUMAN	RBM14	RNA-binding protein 14
24.1449	20.674	Q13123	Q13123	RED_HUMAN	IK	Protein Red
24.1449	23.4955	Q08AM6	H3BUU8;H3BN23;Q08AM6	VAC14_HUMAN	VAC14	Protein VAC14 homolog
24.1452	22.9175	Q8TEU7;Q8TEU7-3;Q8TEU7-4;Q8TEU7-5	D6RE77;Q8TEU7-3;Q8TEU7-4;Q8TEU7-5;Q8TEU7-2;A0A5F9ZHG7;E9PCH4;Q8TEU7	RPGF6_HUMAN	RAPGEF6	Rap guanine nucleotide exchange factor 6
24.1452	20.8367	Q02413	Q02413	DSG1_HUMAN	DSG1	Desmoglein-1
24.1456	22.6076	O43290	E9PQI8;O43290	SNUT1_HUMAN	SART1	U4/U6.U5 tri-snRNP-associated protein 1
24.1466	22.7568	Q05682-3	E7EX44;Q05682-2;Q05682-3;Q05682-6	CALD1_HUMAN	CALD1	Isoform of Q05682, Isoform 3 of Caldesmon
24.1468	NaN	L0R6Q1	L0R6Q1	S35U4_HUMAN	SLC35A4	Isoform of Q96G79, SLC35A4 upstream open reading frame protein
24.1477	18.8994	Q9BQG0;Q9BQG0-2	Q9BQG0-2;I3L1L3;Q9BQG0	MBB1A_HUMAN	MYBBP1A	Myb-binding protein 1A
24.1478	21.8825	Q9C0D5	Q9C0D5-2;Q9C0D5	TANC1_HUMAN	TANC1	Protein TANC1
24.1497	21.7162	O00186	O00186	STXB3_HUMAN	STXBP3	Syntaxin-binding protein 3
24.1502	NaN	A6NGU5;P19440;P36268;P36268-2;P36268-3	P19440-3;B5MC34;B5MC36;A0A494C1J8;P36268-2;P36268-3;P36268;A6NGU5;Q14390;P19440;B5MD39	GGT1_HUMAN;GGT2_HUMAN;GGT3_HUMAN	GGT1;GGT2P;GGT3P	Putative glutathione hydrolase 3 proenzyme
24.1505	NaN	Q9Y5Y2	H3BQR2;B7Z6P0;Q9Y5Y2	NUBP2_HUMAN	NUBP2	Cytosolic Fe-S cluster assembly factor NUBP2
24.1513	22.6378	Q96FV9	Q96FV9	THOC1_HUMAN	THOC1	THO complex subunit 1
24.1515	22.1591	Q9NVR5	Q9NVR5-2;Q9NVR5	KTU_HUMAN	DNAAF2	Protein kintoun
24.1516	21.2427	Q9UPM8	H0YL95;H0YK95;Q9UPM8	AP4E1_HUMAN	AP4E1	AP-4 complex subunit epsilon-1
24.1529	21.1375	O95677;O95677-2;O95677-4;O95677-5	Q99502-2;Q99502-3;A6NCB9;A0A2R8Y6K4;E7ESD5;E7EQM5;A0A2R8YGM9;F8WB53;A0A2R8YET7;A0A8C8KDW0;A0A804HHY3;E9PLN6;O95677-2;O95677-4;O95677-5;F2Z2Y1;O95677;Q99502	EYA4_HUMAN	EYA4	Eyes absent homolog 4
24.1536	NaN	O14607;O14607-4;O14607-5	A0A6Q8PFK0;A0A6Q8PFD0;A0A6Q8PG92;A0A6Q8PG32;A0A6Q8PGN0;A0A096LPD8;A0A6Q8PHJ0;A0A6Q8PHB6;F8W8R6;A0A8C8KHL4;H0Y6I7;A0A804HI49;A0A804HJV1;A0A804HJA2;A0A804HKG5;O14607-2;O14607-3;O14607-4;O14607-5;A0A087X0Y2;A0A087X0R0;A0A087X248;A0A087X2I9;F5GWV3;F5H6S1;F5H8B4;F5H5V6;F5H3N7;O14607;O15550	UTY_HUMAN	UTY	Histone demethylase UTY
24.1537	18.7678	Q8WTV0-2;Q8WTV0-4	A0A0S2Z3I2;B7ZKQ9;A0A7P0T9I2;A0A7P0T913;A0A7P0T9B3;Q8WTV0-2;Q8WTV0-4;Q8WTV0-5;A0A7P0Z4E3;F5H5E8;F5H4X0;Q8WTV0	SCRB1_HUMAN	SCARB1	Isoform of Q8WTV0, Isoform 1 of Scavenger receptor class B member 1
24.1549	24.9938	Q9UHR6	Q9UHR6	ZNHI2_HUMAN	ZNHIT2	Zinc finger HIT domain-containing protein 2
24.157	22.6423	Q9UNP9;Q9UNP9-2;Q9UNP9-3	Q9UNP9-2;Q9UNP9-3;E9PK21;Q9UNP9	PPIE_HUMAN	PPIE	Peptidyl-prolyl cis-trans isomerase E
24.1589	21.8797	Q8N9N8	E9PS30;E9PS76;E9PQD0;E9PLI6;Q8N9N8	EIF1A_HUMAN	EIF1AD	Probable RNA-binding protein EIF1AD
24.1597	NaN	A0A7I2YQ88	A0A7I2YQ88	A0A7I2YQ88_HUMAN	PABPC1	Isoform of P11940, Polyadenylate-binding protein
24.1614	NaN	Q9Y446;Q9Y446-2	Q9Y446-2;Q9Y446	PKP3_HUMAN	PKP3	Plakophilin-3
24.1634	NaN	Q9NNW5	E9PDU5;A0A087X295;Q9NNW5	WDR6_HUMAN	WDR6	WD repeat-containing protein 6
24.1638	22.5905	O43172	O43172-2;O43172	PRP4_HUMAN	PRPF4	U4/U6 small nuclear ribonucleoprotein Prp4
24.1646	19.6477	O95714	A0A0J9YXQ8;O95714	HERC2_HUMAN	HERC2	E3 ubiquitin-protein ligase HERC2
24.1651	NaN	Q9BTY2	Q9BTY2-2;Q9BTY2	FUCO2_HUMAN	FUCA2	Plasma alpha-L-fucosidase
24.1668	17.7355	Q9BRT9	Q9BRT9-2;E5RH56;E5RFF9;Q9BRT9	SLD5_HUMAN	GINS4	DNA replication complex GINS protein SLD5
24.1684	30.6524	Q13618;Q13618-2	Q13618-2;Q13618-3;Q13618	CUL3_HUMAN	CUL3	Cullin-3
24.1685	22.1608	Q7Z4H7	Q7Z4H7-2;Q7Z4H7-3;Q5VY60;Q7Z4H7	HAUS6_HUMAN	HAUS6	HAUS augmin-like complex subunit 6
24.1727	22.2061	Q9UJX2	Q9UJX2-3;Q9UJX2	CDC23_HUMAN	CDC23	Cell division cycle protein 23 homolog
24.1758	24.7176	Q9BUP3	Q9BUP3-2;E9PI87;Q9BUP3	HTAI2_HUMAN	HTATIP2	Oxidoreductase HTATIP2
24.1759	21.4541	Q96EM0	D6RC46;E9PKK7;Q96EM0	T3HPD_HUMAN	L3HYPDH	Trans-3-hydroxy-L-proline dehydratase
24.179	22.7812	Q8NBJ4;Q8NBJ4-2	Q8NBJ4-2;Q8NBJ4	GOLM1_HUMAN	GOLM1	Golgi membrane protein 1
24.1809	19.3678	Q9NWQ9	Q9NWQ9	CN119_HUMAN	C14orf119	Uncharacterized protein C14orf119
24.1814	21.0251	Q8NFD5-1	A0A3F2YNW7;Q8NFD5-1;Q8NFD5-2;Q8NFD5-3;A0A1B0GV63;A0A1B0GTJ8;A0A1B0GWJ2;H0Y7H8;A0A1B0GVK1;H0Y3S9;H0Y2R3;A0A6Q8NVI4;A0A8J9GB59;Q8NFD5	ARI1B_HUMAN	ARID1B	Isoform of Q8NFD5, Isoform 1 of AT-rich interactive domain-containing protein 1B
24.1816	23.5521	Q9ULX6;Q9ULX6-2	Q9ULX6-2;A0A7P0TAE3;A0A7P0TAJ5;Q9ULX6	AKP8L_HUMAN	AKAP8L	A-kinase anchor protein 8-like
24.1823	19.7004	Q02252;Q02252-2	Q02252-2;Q02252	MMSA_HUMAN	ALDH6A1	Methylmalonate-semialdehyde dehydrogenase [acylating], mitochondrial
24.1824	27.0037	Q7L3B6	B1AL69;Q7L3B6	CD37L_HUMAN	CDC37L1	Hsp90 co-chaperone Cdc37-like 1
24.1859	19.8291	O43913;O43913-2	O43913-2;G3V0H0;O43913	ORC5_HUMAN	ORC5	Origin recognition complex subunit 5
24.1865	19.9146	Q9UL33;Q9UL33-2	H3BUK6;H3BP13;Q9UL33-2;A0A0B4J294;Q9UL33	TPC2L_HUMAN	TRAPPC2L	Trafficking protein particle complex subunit 2-like protein
24.188	21.472	Q9Y2L5	J3QQJ5;Q9Y2L5-2;Q9Y2L5	TPPC8_HUMAN	TRAPPC8	Trafficking protein particle complex subunit 8
24.1882	21.8135	O95985;O95985-2;O95985-3	O95985-2;O95985-3;C9JT00;C9JKE2;C9JEI7;F2Z2A5;O95985	TOP3B_HUMAN	TOP3B	DNA topoisomerase 3-beta-1
24.189	20.8814	Q92995;Q92995-2	Q92995-2;A0A7P0T9H6;A0A7P0T859;A0A7P0TB69;A0A7P0TB92;A0A7P0TAC6;A0A7P0TAJ9;A0A7P0TAP9;A0A7P0TB48;A0A7P0Z4P4;Q92995	UBP13_HUMAN	USP13	Ubiquitin carboxyl-terminal hydrolase 13
24.1912	20.9994	Q92854	Q92854	SEM4D_HUMAN	SEMA4D	Semaphorin-4D
24.1916	19.9601	O14832	C9JR86;B1ALH6;O14832	PAHX_HUMAN	PHYH	Phytanoyl-CoA dioxygenase, peroxisomal
24.1926	20.1697	Q8IZP0;Q8IZP0-10;Q8IZP0-12;Q8IZP0-2;Q8IZP0-3;Q8IZP0-4;Q8IZP0-5;Q8IZP0-6;Q8IZP0-7;Q8IZP0-8;Q8IZP0-9	B6VEX4;A0A0A0MRT6;Q8IZP0-10;Q8IZP0-12;Q8IZP0-2;Q8IZP0-3;Q8IZP0-4;Q8IZP0-5;Q8IZP0-6;Q8IZP0-7;Q8IZP0-8;Q8IZP0-9;Q8IZP0	ABI1_HUMAN	ABI1	Abl interactor 1
24.1947	21.843	Q9Y4C2;Q9Y4C2-2	Q9Y4C2-2;Q9Y4C2	TCAF1_HUMAN	TCAF1	TRPM8 channel-associated factor 1
24.1957	21.4082	Q15599;Q15599-2	H3BQS0;Q15599-2;Q15599-3;Q15599	NHRF2_HUMAN	NHERF2	Na(+)/H(+) exchange regulatory cofactor NHE-RF2
24.1965	21.7543	Q6UUV7;Q6UUV7-3	Q6UUV7-3;Q6UUV7	CRTC3_HUMAN	CRTC3	CREB-regulated transcription coactivator 3
24.1974	22.516	O60942	O60942-2;O60942-3;O60942-4;O60942	MCE1_HUMAN	RNGTT	mRNA-capping enzyme
24.1977	21.2069	Q15311	Q15311	RBP1_HUMAN	RALBP1	RalA-binding protein 1
24.1992	21.0439	Q9HB90	Q9HB90	RRAGC_HUMAN	RRAGC	Ras-related GTP-binding protein C
24.1999	NaN	Q9NRS6;Q9NRS6-2	Q9NRS6-2;E9PNI5;Q9NRS6	SNX15_HUMAN	SNX15	Sorting nexin-15
24.2007	NaN	Q9H5Z6-2	Q9H5Z6-2	F124B_HUMAN	FAM124B	Isoform of Q9H5Z6, Isoform 2 of Protein FAM124B
24.2014	22.1492	Q6WCQ1-2;Q6WCQ1-3	J3KSW8;A0A1W2PPU9;A0A494BZV2;Q6WCQ1-2;Q6WCQ1-3;Q6WCQ1	MPRIP_HUMAN	MPRIP	Isoform of Q6WCQ1, Isoform 2 of Myosin phosphatase Rho-interacting protein
24.2029	21.4897	Q6NXR4	E5RIH5;Q6NXR4	TTI2_HUMAN	TTI2	TELO2-interacting protein 2
24.2046	21.1804	Q96BW5;Q96BW5-2	Q96BW5-2;Q96BW5	PTER_HUMAN	PTER	Phosphotriesterase-related protein
24.2048	NaN	Q9BUI4	E9PHH9;A0A8V8TNN2;A0A8V8TM54;A0A8V8TMN9;Q9BUI4	RPC3_HUMAN	POLR3C	DNA-directed RNA polymerase III subunit RPC3
24.2052	22.1058	Q9NWH9	H7BXE3;H7C3F4;Q9NWH9	SLTM_HUMAN	SLTM	SAFB-like transcription modulator
[truncated: 3,100 more rows]
